# Supplementary material for: Activity dynamics of amygdala GABAergic neurons during cataplexy of narcolepsy
Source: eLife. 2019 Aug 14;8:e48311. doi: 10.7554/eLife.48311 (PMC6703899; doi:10.7554/eLife.48311)
Supplement: Figure 2—source data 1. [file elife-48311-fig2-data1.xlsx]

## Sheet: 2D
	C01	C02	C03	C04	C05	C06	C07	C08	C09	C10	C11	C12	C13	C14	C15	C16	C17	C18	C19	C20	C21	C22	C23	C24	C25	C26	C27	C28	C29	C30	C31	C32	C33	C34	C35	C36	C37	C38	C39	C40	C41	C42	C43	C44
NREMS	-0.00965	-0.06066	-0.20696	-0.09019	-0.11297	-0.06474	-0.36396	0.187488	0.024929	-0.26254	-0.20457	-0.52762	-0.34716	-0.29559	-0.1413	-0.05201	-0.19431	-0.2372	-0.36048	-0.50432	-0.65219	0.672918	-0.64166	-0.47247	-0.14524	-0.1869	-0.28232	0.85674	-0.26406	-0.2596	0.045277	-0.45075	-0.38664	-0.4591	-0.52658	0.223779	-0.61518	-0.5587	-0.83036	-0.43752	-0.7523	-0.56716	-0.40104	-0.18739
REMS	2.21996	1.74904	-0.08161	-0.10647	-0.33395	-0.05569	0.041936	-0.09936	2.45454	-0.33895	0.102951	0.78782	-0.00929	-0.15983	1.37761	-0.02209	-0.23818	0.511675	-0.37131	-0.83942	-0.73998	1.40426	0.052379	-0.29416	-0.61163	-0.45897	0.160559	-0.25603	0.034961	-0.14463	0.437368	-0.37425	-0.15545	0.194947	-0.65897	1.45872	-0.36792	-0.37905	0.118229	0.241549	-0.28138	-0.23609	0.691184	-0.24724
QW	-0.08083	-0.12657	-0.3896	-0.15937	-0.08543	-0.0404	-0.24727	-0.16331	0.108631	-0.2515	-0.09217	-0.7789	-0.29195	-0.16361	-0.07224	0.030702	-0.3738	-0.14591	-0.38468	-0.69906	-0.41546	-0.36582	-0.76559	-0.35928	-0.0965	-0.42797	-0.44491	-0.70372	-0.75016	-0.12816	-0.68686	-0.34594	-0.34344	-0.66363	-0.06178	-0.24858	-0.58786	-0.7681	-1.02797	-0.63675	-0.94474	-0.54234	-0.36743	0.498415
AW	-0.0465	-0.10285	-0.03684	-0.01218	0.070332	0.484237	0.211692	-0.17546	-0.00305	0.273639	0.566031	0.743828	1.12904	0.41553	0.266444	0.406956	-0.2413	0.382954	0.147258	0.914391	0.415228	-0.87281	0.485734	1.29179	1.23104	0.474902	0.378769	-0.28363	-0.13993	1.53651	0.097978	1.3074	0.781521	0.546769	0.457137	-0.09612	0.523303	-0.23528	1.05919	1.19158	0.285737	0.044656	0.904979	0.932571
SC	0.026449	-0.1007	-0.08876	-0.17882	0.011668	0.210232	-0.38953	0.886254	-0.06733	-0.33649	3.98016	-0.48537	-0.34521	0.726045	0.142106	-0.10522	0.178209	0.066837	-0.24599	-0.01978	-0.15377	-0.02781	-0.16622	0.052095	0.592107	-0.04305	-0.27581	1.55683	-0.28518	-0.10698	0.065052	0.024353	-0.43726	0.293454	0.225615	-0.5228	-0.65712	-0.12841	-0.41862	-0.42879	-0.74638	-0.69948	0.003476	0.745553

## Sheet: 2C
Group	Mouse ID	ROI	States	Z-scores
WT	LR04101618	LR04101618C01	AW	0.386895
WT	LR04101618	LR04101618C02	AW	0.778004
WT	LR04101618	LR04101618C03	AW	-0.336717
WT	LR04101618	LR04101618C04	AW	-0.540505
WT	LR04101618	LR04101618C05	AW	0.100267
WT	LR04101618	LR04101618C06	AW	0.212001
WT	LR04101618	LR04101618C07	AW	0.354178
WT	LR04101618	LR04101618C08	AW	0.435257
WT	LR04101618	LR04101618C09	AW	0.959387
WT	LR04101618	LR04101618C10	AW	-0.349989
WT	LR04101618	LR04101618C11	AW	0.450427
WT	LR04101618	LR04101618C12	AW	-0.33131
WT	LR04101618	LR04101618C13	AW	0.416913
WT	LR04101618	LR04101618C14	AW	1.19312
WT	LR04101618	LR04101618C15	AW	1.06404
WT	LR04101618	LR04101618C16	AW	1.19284
WT	LR04101618	LR04101618C17	AW	0.270469
WT	LR04101618	LR04101618C18	AW	2.0948
WT	LR04101618	LR04101618C19	AW	-0.523965
WT	LR04101618	LR04101618C20	AW	0.899909
WT	LR04101618	LR04101618C21	AW	0.372508
WT	LR04101618	LR04101618C22	AW	1.10105
WT	LR04101618	LR04101618C23	AW	-0.0549124
WT	LR04101618	LR04101618C24	AW	0.198645
WT	LR04101618	LR04101618C25	AW	-0.224133
WT	LR04101618	LR04101618C26	AW	0.229855
WT	LR04101618	LR04101618C27	AW	0.894184
WT	LR04101618	LR04101618C28	AW	0.45722
WT	LR04101618	LR04101618C29	AW	0.386824
WT	LR04101618	LR04101618C30	AW	0.260784
WT	LR04101618	LR04101618C31	AW	-0.157443
WT	LR04101618	LR04101618C32	AW	1.76299
WT	LR04101618	LR04101618C33	AW	1.23387
WT	LR04101618	LR04101618C34	AW	0.498153
WT	LR04101618	LR04101618C35	AW	0.0126499
WT	LR04101618	LR04101618C36	AW	0.384779
WT	LR04101618	LR04101618C37	AW	0.215367
WT	LR04101618	LR04101618C38	AW	-0.126291
WT	LR04101618	LR04101618C01	HAW	0.47094
WT	LR04101618	LR04101618C02	HAW	1.51037
WT	LR04101618	LR04101618C03	HAW	-0.491152
WT	LR04101618	LR04101618C04	HAW	-0.593969
WT	LR04101618	LR04101618C05	HAW	0.281625
WT	LR04101618	LR04101618C06	HAW	0.341902
WT	LR04101618	LR04101618C07	HAW	0.586324
WT	LR04101618	LR04101618C08	HAW	0.725744
WT	LR04101618	LR04101618C09	HAW	0.442931
WT	LR04101618	LR04101618C10	HAW	0.580083
WT	LR04101618	LR04101618C11	HAW	0.601867
WT	LR04101618	LR04101618C12	HAW	0.386395
WT	LR04101618	LR04101618C13	HAW	0.462218
WT	LR04101618	LR04101618C14	HAW	0.107495
WT	LR04101618	LR04101618C15	HAW	1.22245
WT	LR04101618	LR04101618C16	HAW	0.912378
WT	LR04101618	LR04101618C17	HAW	0.0975017
WT	LR04101618	LR04101618C18	HAW	1.06954
WT	LR04101618	LR04101618C19	HAW	-0.430397
WT	LR04101618	LR04101618C20	HAW	1.14219
WT	LR04101618	LR04101618C21	HAW	1.17089
WT	LR04101618	LR04101618C22	HAW	1.23348
WT	LR04101618	LR04101618C23	HAW	-0.114245
WT	LR04101618	LR04101618C24	HAW	0.177495
WT	LR04101618	LR04101618C25	HAW	0.0412168
WT	LR04101618	LR04101618C26	HAW	-0.0509606
WT	LR04101618	LR04101618C27	HAW	1.08252
WT	LR04101618	LR04101618C28	HAW	0.247302
WT	LR04101618	LR04101618C29	HAW	0.566025
WT	LR04101618	LR04101618C30	HAW	1.04014
WT	LR04101618	LR04101618C31	HAW	-0.000540216
WT	LR04101618	LR04101618C32	HAW	1.80976
WT	LR04101618	LR04101618C33	HAW	0.802104
WT	LR04101618	LR04101618C34	HAW	0.44918
WT	LR04101618	LR04101618C35	HAW	0.0226458
WT	LR04101618	LR04101618C36	HAW	0.392039
WT	LR04101618	LR04101618C37	HAW	0.277973
WT	LR04101618	LR04101618C38	HAW	0.126174
WT	LR04101618	LR04101618C01	NREMS	-0.312924
WT	LR04101618	LR04101618C02	NREMS	-0.24956
WT	LR04101618	LR04101618C03	NREMS	-0.156393
WT	LR04101618	LR04101618C04	NREMS	-0.384686
WT	LR04101618	LR04101618C05	NREMS	-0.0515937
WT	LR04101618	LR04101618C06	NREMS	-0.363778
WT	LR04101618	LR04101618C07	NREMS	-0.0776463
WT	LR04101618	LR04101618C08	NREMS	-0.199675
WT	LR04101618	LR04101618C09	NREMS	-0.505337
WT	LR04101618	LR04101618C10	NREMS	0.226872
WT	LR04101618	LR04101618C11	NREMS	-0.163078
WT	LR04101618	LR04101618C12	NREMS	-0.484299
WT	LR04101618	LR04101618C13	NREMS	-0.00331233
WT	LR04101618	LR04101618C14	NREMS	-0.0297921
WT	LR04101618	LR04101618C15	NREMS	-0.300151
WT	LR04101618	LR04101618C16	NREMS	-0.562921
WT	LR04101618	LR04101618C17	NREMS	0.756618
WT	LR04101618	LR04101618C18	NREMS	-0.1717
WT	LR04101618	LR04101618C19	NREMS	-0.264116
WT	LR04101618	LR04101618C20	NREMS	-0.448425
WT	LR04101618	LR04101618C21	NREMS	0.811399
WT	LR04101618	LR04101618C22	NREMS	-0.123216
WT	LR04101618	LR04101618C23	NREMS	-0.540627
WT	LR04101618	LR04101618C24	NREMS	-0.253466
WT	LR04101618	LR04101618C25	NREMS	0.127901
WT	LR04101618	LR04101618C26	NREMS	-0.192175
WT	LR04101618	LR04101618C27	NREMS	-0.26374
WT	LR04101618	LR04101618C28	NREMS	-0.537297
WT	LR04101618	LR04101618C29	NREMS	-0.400258
WT	LR04101618	LR04101618C30	NREMS	-0.395304
WT	LR04101618	LR04101618C31	NREMS	-0.186552
WT	LR04101618	LR04101618C32	NREMS	-0.547214
WT	LR04101618	LR04101618C33	NREMS	-0.199037
WT	LR04101618	LR04101618C34	NREMS	-0.13536
WT	LR04101618	LR04101618C35	NREMS	-0.598509
WT	LR04101618	LR04101618C36	NREMS	0.683984
WT	LR04101618	LR04101618C37	NREMS	-0.244463
WT	LR04101618	LR04101618C38	NREMS	-0.173629
WT	LR04101618	LR04101618C01	QW	-0.376905
WT	LR04101618	LR04101618C02	QW	-0.355312
WT	LR04101618	LR04101618C03	QW	-0.249209
WT	LR04101618	LR04101618C04	QW	-0.428224
WT	LR04101618	LR04101618C05	QW	-0.140451
WT	LR04101618	LR04101618C06	QW	-0.471064
WT	LR04101618	LR04101618C07	QW	0.0600937
WT	LR04101618	LR04101618C08	QW	0.15011
WT	LR04101618	LR04101618C09	QW	-0.0262613
WT	LR04101618	LR04101618C10	QW	0.49459
WT	LR04101618	LR04101618C11	QW	-0.214771
WT	LR04101618	LR04101618C12	QW	-0.385352
WT	LR04101618	LR04101618C13	QW	-0.266603
WT	LR04101618	LR04101618C14	QW	0.0813296
WT	LR04101618	LR04101618C15	QW	-0.281803
WT	LR04101618	LR04101618C16	QW	-0.778517
WT	LR04101618	LR04101618C17	QW	-0.418493
WT	LR04101618	LR04101618C18	QW	-0.289313
WT	LR04101618	LR04101618C19	QW	0.307634
WT	LR04101618	LR04101618C20	QW	0.421404
WT	LR04101618	LR04101618C21	QW	-0.330367
WT	LR04101618	LR04101618C22	QW	-0.217459
WT	LR04101618	LR04101618C23	QW	-0.607804
WT	LR04101618	LR04101618C24	QW	0.471679
WT	LR04101618	LR04101618C25	QW	0.318532
WT	LR04101618	LR04101618C26	QW	-0.331017
WT	LR04101618	LR04101618C27	QW	-0.452516
WT	LR04101618	LR04101618C28	QW	0.0258937
WT	LR04101618	LR04101618C29	QW	-0.0397448
WT	LR04101618	LR04101618C30	QW	-0.410616
WT	LR04101618	LR04101618C31	QW	-0.344785
WT	LR04101618	LR04101618C32	QW	-0.824947
WT	LR04101618	LR04101618C33	QW	-0.207481
WT	LR04101618	LR04101618C34	QW	-0.275228
WT	LR04101618	LR04101618C35	QW	-0.98831
WT	LR04101618	LR04101618C36	QW	-0.499787
WT	LR04101618	LR04101618C37	QW	-0.323123
WT	LR04101618	LR04101618C38	QW	-0.373613
WT	LR04101618	LR04101618C01	REMS	-0.103392
WT	LR04101618	LR04101618C02	REMS	1.28507
WT	LR04101618	LR04101618C03	REMS	1.16197
WT	LR04101618	LR04101618C04	REMS	2.1363
WT	LR04101618	LR04101618C05	REMS	-0.11693
WT	LR04101618	LR04101618C06	REMS	0.710168
WT	LR04101618	LR04101618C07	REMS	1.00748
WT	LR04101618	LR04101618C08	REMS	-0.480406
WT	LR04101618	LR04101618C09	REMS	-0.0595753
WT	LR04101618	LR04101618C10	REMS	2.3783
WT	LR04101618	LR04101618C11	REMS	-0.0595276
WT	LR04101618	LR04101618C12	REMS	2.32515
WT	LR04101618	LR04101618C13	REMS	-0.104392
WT	LR04101618	LR04101618C14	REMS	-0.045687
WT	LR04101618	LR04101618C15	REMS	-0.349646
WT	LR04101618	LR04101618C16	REMS	0.100566
WT	LR04101618	LR04101618C17	REMS	0.131393
WT	LR04101618	LR04101618C18	REMS	-0.152727
WT	LR04101618	LR04101618C19	REMS	2.10102
WT	LR04101618	LR04101618C20	REMS	-0.433387
WT	LR04101618	LR04101618C21	REMS	-0.115001
WT	LR04101618	LR04101618C22	REMS	0.290409
WT	LR04101618	LR04101618C23	REMS	0.202435
WT	LR04101618	LR04101618C24	REMS	1.8911
WT	LR04101618	LR04101618C25	REMS	1.21969
WT	LR04101618	LR04101618C26	REMS	1.36216
WT	LR04101618	LR04101618C27	REMS	-0.183255
WT	LR04101618	LR04101618C28	REMS	-0.402706
WT	LR04101618	LR04101618C29	REMS	0.0712581
WT	LR04101618	LR04101618C30	REMS	-0.114225
WT	LR04101618	LR04101618C31	REMS	-0.32836
WT	LR04101618	LR04101618C32	REMS	-0.570137
WT	LR04101618	LR04101618C33	REMS	0.276232
WT	LR04101618	LR04101618C34	REMS	-0.181541
WT	LR04101618	LR04101618C35	REMS	0.31952
WT	LR04101618	LR04101618C36	REMS	-0.060194
WT	LR04101618	LR04101618C37	REMS	-0.984799
WT	LR04101618	LR04101618C38	REMS	-0.332713
WT	LR12011419	LR12011419C01	AW	0.385752
WT	LR12011419	LR12011419C02	AW	0.654778
WT	LR12011419	LR12011419C03	AW	0.00365247
WT	LR12011419	LR12011419C04	AW	0.128477
WT	LR12011419	LR12011419C05	AW	1.02587
WT	LR12011419	LR12011419C06	AW	0.298999
WT	LR12011419	LR12011419C07	AW	0.365353
WT	LR12011419	LR12011419C08	AW	0.572516
WT	LR12011419	LR12011419C09	AW	1.25367
WT	LR12011419	LR12011419C10	AW	1.41236
WT	LR12011419	LR12011419C11	AW	0.233357
WT	LR12011419	LR12011419C12	AW	0.235515
WT	LR12011419	LR12011419C13	AW	0.69
WT	LR12011419	LR12011419C14	AW	0.114236
WT	LR12011419	LR12011419C15	AW	0.987789
WT	LR12011419	LR12011419C16	AW	0.398523
WT	LR12011419	LR12011419C17	AW	0.478858
WT	LR12011419	LR12011419C18	AW	0.102512
WT	LR12011419	LR12011419C19	AW	0.786322
WT	LR12011419	LR12011419C20	AW	0.00258978
WT	LR12011419	LR12011419C21	AW	0.332476
WT	LR12011419	LR12011419C22	AW	-0.0122368
WT	LR12011419	LR12011419C23	AW	0.387477
WT	LR12011419	LR12011419C24	AW	0.566363
WT	LR12011419	LR12011419C25	AW	0.457785
WT	LR12011419	LR12011419C26	AW	0.334322
WT	LR12011419	LR12011419C27	AW	0.991023
WT	LR12011419	LR12011419C28	AW	0.124523
WT	LR12011419	LR12011419C01	HAW	0.777805
WT	LR12011419	LR12011419C02	HAW	0.423337
WT	LR12011419	LR12011419C03	HAW	0.645234
WT	LR12011419	LR12011419C04	HAW	0.0023569
WT	LR12011419	LR12011419C05	HAW	0.984222
WT	LR12011419	LR12011419C06	HAW	-0.102237
WT	LR12011419	LR12011419C07	HAW	1.23659
WT	LR12011419	LR12011419C08	HAW	-0.104854
WT	LR12011419	LR12011419C09	HAW	0.856666
WT	LR12011419	LR12011419C10	HAW	1.05224
WT	LR12011419	LR12011419C11	HAW	0.252127
WT	LR12011419	LR12011419C12	HAW	0.452889
WT	LR12011419	LR12011419C13	HAW	0.652012
WT	LR12011419	LR12011419C14	HAW	0.374744
WT	LR12011419	LR12011419C15	HAW	0.577743
WT	LR12011419	LR12011419C16	HAW	0.522211
WT	LR12011419	LR12011419C17	HAW	0.292222
WT	LR12011419	LR12011419C18	HAW	0.943856
WT	LR12011419	LR12011419C19	HAW	0.833925
WT	LR12011419	LR12011419C20	HAW	-0.204789
WT	LR12011419	LR12011419C21	HAW	0.544433
WT	LR12011419	LR12011419C22	HAW	0.3922
WT	LR12011419	LR12011419C23	HAW	0.192224
WT	LR12011419	LR12011419C24	HAW	0.224744
WT	LR12011419	LR12011419C25	HAW	0.675522
WT	LR12011419	LR12011419C26	HAW	0.200015
WT	LR12011419	LR12011419C27	HAW	0.885567
WT	LR12011419	LR12011419C28	HAW	0.403332
WT	LR12011419	LR12011419C01	NREMS	-0.122421
WT	LR12011419	LR12011419C02	NREMS	-0.314226
WT	LR12011419	LR12011419C03	NREMS	0.875446
WT	LR12011419	LR12011419C04	NREMS	-0.247899
WT	LR12011419	LR12011419C05	NREMS	-0.168839
WT	LR12011419	LR12011419C06	NREMS	-0.462145
WT	LR12011419	LR12011419C07	NREMS	-0.277823
WT	LR12011419	LR12011419C08	NREMS	-0.56363
WT	LR12011419	LR12011419C09	NREMS	-0.253562
WT	LR12011419	LR12011419C10	NREMS	-0.382115
WT	LR12011419	LR12011419C11	NREMS	-0.265865
WT	LR12011419	LR12011419C12	NREMS	-0.425889
WT	LR12011419	LR12011419C13	NREMS	-0.204735
WT	LR12011419	LR12011419C14	NREMS	-0.387413
WT	LR12011419	LR12011419C15	NREMS	-0.112425
WT	LR12011419	LR12011419C16	NREMS	-0.241478
WT	LR12011419	LR12011419C17	NREMS	-0.189879
WT	LR12011419	LR12011419C18	NREMS	-0.144726
WT	LR12011419	LR12011419C19	NREMS	-0.255248
WT	LR12011419	LR12011419C20	NREMS	0.00174559
WT	LR12011419	LR12011419C21	NREMS	-0.162399
WT	LR12011419	LR12011419C22	NREMS	-0.274446
WT	LR12011419	LR12011419C23	NREMS	-0.268879
WT	LR12011419	LR12011419C24	NREMS	-0.665878
WT	LR12011419	LR12011419C25	NREMS	-0.136987
WT	LR12011419	LR12011419C26	NREMS	-0.441112
WT	LR12011419	LR12011419C27	NREMS	-0.233374
WT	LR12011419	LR12011419C28	NREMS	-0.421111
WT	LR12011419	LR12011419C01	QW	-0.347774
WT	LR12011419	LR12011419C02	QW	-0.402837
WT	LR12011419	LR12011419C03	QW	-0.699241
WT	LR12011419	LR12011419C04	QW	-0.143875
WT	LR12011419	LR12011419C05	QW	-0.224748
WT	LR12011419	LR12011419C06	QW	-0.699985
WT	LR12011419	LR12011419C07	QW	0.10432
WT	LR12011419	LR12011419C08	QW	-0.906587
WT	LR12011419	LR12011419C09	QW	-0.377027
WT	LR12011419	LR12011419C10	QW	0.112154
WT	LR12011419	LR12011419C11	QW	-0.241115
WT	LR12011419	LR12011419C12	QW	-0.27889
WT	LR12011419	LR12011419C13	QW	-0.360026
WT	LR12011419	LR12011419C14	QW	-0.430536
WT	LR12011419	LR12011419C15	QW	0.21042
WT	LR12011419	LR12011419C16	QW	0.00582257
WT	LR12011419	LR12011419C17	QW	-0.247711
WT	LR12011419	LR12011419C18	QW	-0.102696
WT	LR12011419	LR12011419C19	QW	-0.292925
WT	LR12011419	LR12011419C20	QW	-0.301148
WT	LR12011419	LR12011419C21	QW	-0.614757
WT	LR12011419	LR12011419C22	QW	-0.102355
WT	LR12011419	LR12011419C23	QW	-0.323251
WT	LR12011419	LR12011419C24	QW	-0.441178
WT	LR12011419	LR12011419C25	QW	0.247888
WT	LR12011419	LR12011419C26	QW	-0.685522
WT	LR12011419	LR12011419C27	QW	-0.266934
WT	LR12011419	LR12011419C28	QW	-0.277786
WT	LR12011419	LR12011419C01	REMS	0.880845
WT	LR12011419	LR12011419C02	REMS	1.02325
WT	LR12011419	LR12011419C03	REMS	-0.147858
WT	LR12011419	LR12011419C04	REMS	0.897244
WT	LR12011419	LR12011419C05	REMS	0.421137
WT	LR12011419	LR12011419C06	REMS	0.752232
WT	LR12011419	LR12011419C07	REMS	0.203137
WT	LR12011419	LR12011419C08	REMS	-0.242413
WT	LR12011419	LR12011419C09	REMS	0.22326
WT	LR12011419	LR12011419C10	REMS	0.554863
WT	LR12011419	LR12011419C11	REMS	1.20446
WT	LR12011419	LR12011419C12	REMS	0.185325
WT	LR12011419	LR12011419C13	REMS	0.0124896
WT	LR12011419	LR12011419C14	REMS	0.199962
WT	LR12011419	LR12011419C15	REMS	0.199533
WT	LR12011419	LR12011419C16	REMS	0.0688569
WT	LR12011419	LR12011419C17	REMS	0.222587
WT	LR12011419	LR12011419C18	REMS	0.393005
WT	LR12011419	LR12011419C19	REMS	0.453636
WT	LR12011419	LR12011419C20	REMS	0.992006
WT	LR12011419	LR12011419C21	REMS	0.667456
WT	LR12011419	LR12011419C22	REMS	0.201111
WT	LR12011419	LR12011419C23	REMS	0.585768
WT	LR12011419	LR12011419C24	REMS	0.00266635
WT	LR12011419	LR12011419C25	REMS	0.822221
WT	LR12011419	LR12011419C26	REMS	0.00325718
WT	LR12011419	LR12011419C27	REMS	0.202259
WT	LR12011419	LR12011419C28	REMS	0.400011
WT	LR13022419	LR13022419C01	AW	0.855232
WT	LR13022419	LR13022419C02	AW	0.523327
WT	LR13022419	LR13022419C03	AW	0.398759
WT	LR13022419	LR13022419C04	AW	0.320003
WT	LR13022419	LR13022419C05	AW	0.0322555
WT	LR13022419	LR13022419C06	AW	0.502963
WT	LR13022419	LR13022419C07	AW	1.12037
WT	LR13022419	LR13022419C08	AW	0.00321157
WT	LR13022419	LR13022419C09	AW	0.0882097
WT	LR13022419	LR13022419C10	AW	0.24246
WT	LR13022419	LR13022419C11	AW	0.198759
WT	LR13022419	LR13022419C12	AW	0.517924
WT	LR13022419	LR13022419C13	AW	0.878829
WT	LR13022419	LR13022419C14	AW	0.469015
WT	LR13022419	LR13022419C15	AW	0.294175
WT	LR13022419	LR13022419C16	AW	1.42169
WT	LR13022419	LR13022419C17	AW	0.104857
WT	LR13022419	LR13022419C18	AW	0.267326
WT	LR13022419	LR13022419C19	AW	0.333333
WT	LR13022419	LR13022419C20	AW	0.753637
WT	LR13022419	LR13022419C21	AW	0.999256
WT	LR13022419	LR13022419C22	AW	-0.0180057
WT	LR13022419	LR13022419C23	AW	0.432535
WT	LR13022419	LR13022419C24	AW	0.243335
WT	LR13022419	LR13022419C25	AW	0.904522
WT	LR13022419	LR13022419C26	AW	0.224958
WT	LR13022419	LR13022419C27	AW	0.13336
WT	LR13022419	LR13022419C28	AW	0.1852
WT	LR13022419	LR13022419C29	AW	0.303144
WT	LR13022419	LR13022419C30	AW	1.14259
WT	LR13022419	LR13022419C31	AW	0.0852414
WT	LR13022419	LR13022419C32	AW	0.674419
WT	LR13022419	LR13022419C33	AW	0.191817
WT	LR13022419	LR13022419C34	AW	0.242856
WT	LR13022419	LR13022419C35	AW	0.375222
WT	LR13022419	LR13022419C36	AW	0.198586
WT	LR13022419	LR13022419C37	AW	1.20357
WT	LR13022419	LR13022419C38	AW	0.345154
WT	LR13022419	LR13022419C39	AW	0.075368
WT	LR13022419	LR13022419C40	AW	0.987478
WT	LR13022419	LR13022419C41	AW	0.375526
WT	LR13022419	LR13022419C42	AW	0.533355
WT	LR13022419	LR13022419C43	AW	0.407858
WT	LR13022419	LR13022419C44	AW	0.98779
WT	LR13022419	LR13022419C45	AW	0.340022
WT	LR13022419	LR13022419C46	AW	0.743129
WT	LR13022419	LR13022419C47	AW	0.20041
WT	LR13022419	LR13022419C48	AW	0.0744553
WT	LR13022419	LR13022419C49	AW	0.401521
WT	LR13022419	LR13022419C50	AW	0.145224
WT	LR13022419	LR13022419C51	AW	0.222744
WT	LR13022419	LR13022419C52	AW	0.790022
WT	LR13022419	LR13022419C53	AW	0.358632
WT	LR13022419	LR13022419C54	AW	1.20125
WT	LR13022419	LR13022419C55	AW	0.333527
WT	LR13022419	LR13022419C56	AW	0.482714
WT	LR13022419	LR13022419C57	AW	-0.21479
WT	LR13022419	LR13022419C58	AW	0.401342
WT	LR13022419	LR13022419C59	AW	0.308185
WT	LR13022419	LR13022419C60	AW	0.863688
WT	LR13022419	LR13022419C61	AW	0.188607
WT	LR13022419	LR13022419C62	AW	1.05142
WT	LR13022419	LR13022419C63	AW	1.00119
WT	LR13022419	LR13022419C01	HAW	0.762112
WT	LR13022419	LR13022419C02	HAW	0.288223
WT	LR13022419	LR13022419C03	HAW	0.198686
WT	LR13022419	LR13022419C04	HAW	0.432777
WT	LR13022419	LR13022419C05	HAW	0.801274
WT	LR13022419	LR13022419C06	HAW	0.523615
WT	LR13022419	LR13022419C07	HAW	1.05236
WT	LR13022419	LR13022419C08	HAW	0.201382
WT	LR13022419	LR13022419C09	HAW	0.911624
WT	LR13022419	LR13022419C10	HAW	0.410125
WT	LR13022419	LR13022419C11	HAW	0.199092
WT	LR13022419	LR13022419C12	HAW	0.397452
WT	LR13022419	LR13022419C13	HAW	1.01433
WT	LR13022419	LR13022419C14	HAW	0.272334
WT	LR13022419	LR13022419C15	HAW	0.192001
WT	LR13022419	LR13022419C16	HAW	1.07445
WT	LR13022419	LR13022419C17	HAW	0.132
WT	LR13022419	LR13022419C18	HAW	0.234036
WT	LR13022419	LR13022419C19	HAW	0.2741
WT	LR13022419	LR13022419C20	HAW	0.802411
WT	LR13022419	LR13022419C21	HAW	1.00039
WT	LR13022419	LR13022419C22	HAW	0.201479
WT	LR13022419	LR13022419C23	HAW	0.653322
WT	LR13022419	LR13022419C24	HAW	0.278222
WT	LR13022419	LR13022419C25	HAW	0.140033
WT	LR13022419	LR13022419C26	HAW	0.485213
WT	LR13022419	LR13022419C27	HAW	0.785024
WT	LR13022419	LR13022419C28	HAW	0.408521
WT	LR13022419	LR13022419C29	HAW	0.00141488
WT	LR13022419	LR13022419C30	HAW	0.961239
WT	LR13022419	LR13022419C31	HAW	0.00357518
WT	LR13022419	LR13022419C32	HAW	0.592
WT	LR13022419	LR13022419C33	HAW	0.884321
WT	LR13022419	LR13022419C34	HAW	-0.102366
WT	LR13022419	LR13022419C35	HAW	0.542664
WT	LR13022419	LR13022419C36	HAW	0.241391
WT	LR13022419	LR13022419C37	HAW	1.10255
WT	LR13022419	LR13022419C38	HAW	0.00106389
WT	LR13022419	LR13022419C39	HAW	0.203887
WT	LR13022419	LR13022419C40	HAW	0.331235
WT	LR13022419	LR13022419C41	HAW	0.456732
WT	LR13022419	LR13022419C42	HAW	0.967645
WT	LR13022419	LR13022419C43	HAW	0.167486
WT	LR13022419	LR13022419C44	HAW	0.846359
WT	LR13022419	LR13022419C45	HAW	0.285633
WT	LR13022419	LR13022419C46	HAW	0.863165
WT	LR13022419	LR13022419C47	HAW	0.999946
WT	LR13022419	LR13022419C48	HAW	0.264563
WT	LR13022419	LR13022419C49	HAW	0.508577
WT	LR13022419	LR13022419C50	HAW	0.393333
WT	LR13022419	LR13022419C51	HAW	0.236333
WT	LR13022419	LR13022419C52	HAW	0.241519
WT	LR13022419	LR13022419C53	HAW	0.653341
WT	LR13022419	LR13022419C54	HAW	0.518124
WT	LR13022419	LR13022419C55	HAW	0.345639
WT	LR13022419	LR13022419C56	HAW	0.528867
WT	LR13022419	LR13022419C57	HAW	0.302124
WT	LR13022419	LR13022419C58	HAW	0.445237
WT	LR13022419	LR13022419C59	HAW	0.169635
WT	LR13022419	LR13022419C60	HAW	0.943259
WT	LR13022419	LR13022419C61	HAW	0.342156
WT	LR13022419	LR13022419C62	HAW	0.758963
WT	LR13022419	LR13022419C63	HAW	1.12363
WT	LR13022419	LR13022419C01	NREMS	-0.473653
WT	LR13022419	LR13022419C02	NREMS	-0.158623
WT	LR13022419	LR13022419C03	NREMS	-0.268796
WT	LR13022419	LR13022419C04	NREMS	-0.102456
WT	LR13022419	LR13022419C05	NREMS	1.20354
WT	LR13022419	LR13022419C06	NREMS	-0.242465
WT	LR13022419	LR13022419C07	NREMS	-0.310024
WT	LR13022419	LR13022419C08	NREMS	-0.201412
WT	LR13022419	LR13022419C09	NREMS	-0.114533
WT	LR13022419	LR13022419C10	NREMS	-0.303611
WT	LR13022419	LR13022419C11	NREMS	-0.30227
WT	LR13022419	LR13022419C12	NREMS	-0.232586
WT	LR13022419	LR13022419C13	NREMS	-0.202021
WT	LR13022419	LR13022419C14	NREMS	-0.199326
WT	LR13022419	LR13022419C15	NREMS	-0.453213
WT	LR13022419	LR13022419C16	NREMS	-0.00236323
WT	LR13022419	LR13022419C17	NREMS	-0.441024
WT	LR13022419	LR13022419C18	NREMS	-0.136542
WT	LR13022419	LR13022419C19	NREMS	-0.247852
WT	LR13022419	LR13022419C20	NREMS	-0.130027
WT	LR13022419	LR13022419C21	NREMS	-0.373546
WT	LR13022419	LR13022419C22	NREMS	-0.0869321
WT	LR13022419	LR13022419C23	NREMS	-0.300252
WT	LR13022419	LR13022419C24	NREMS	-0.145633
WT	LR13022419	LR13022419C25	NREMS	-0.463664
WT	LR13022419	LR13022419C26	NREMS	-0.102364
WT	LR13022419	LR13022419C27	NREMS	-0.142536
WT	LR13022419	LR13022419C28	NREMS	-1.3265e-05
WT	LR13022419	LR13022419C29	NREMS	0.852133
WT	LR13022419	LR13022419C30	NREMS	-0.34759
WT	LR13022419	LR13022419C31	NREMS	-0.358964
WT	LR13022419	LR13022419C32	NREMS	-0.363547
WT	LR13022419	LR13022419C33	NREMS	-0.435633
WT	LR13022419	LR13022419C34	NREMS	-0.241564
WT	LR13022419	LR13022419C35	NREMS	-0.102321
WT	LR13022419	LR13022419C36	NREMS	0.136366
WT	LR13022419	LR13022419C37	NREMS	-0.19637
WT	LR13022419	LR13022419C38	NREMS	-0.414565
WT	LR13022419	LR13022419C39	NREMS	-0.215554
WT	LR13022419	LR13022419C40	NREMS	0.00321459
WT	LR13022419	LR13022419C41	NREMS	-0.342322
WT	LR13022419	LR13022419C42	NREMS	-0.520123
WT	LR13022419	LR13022419C43	NREMS	-0.321321
WT	LR13022419	LR13022419C44	NREMS	-0.342516
WT	LR13022419	LR13022419C45	NREMS	-0.534252
WT	LR13022419	LR13022419C46	NREMS	-0.523556
WT	LR13022419	LR13022419C47	NREMS	-0.453215
WT	LR13022419	LR13022419C48	NREMS	-0.132569
WT	LR13022419	LR13022419C49	NREMS	-0.399876
WT	LR13022419	LR13022419C50	NREMS	-0.220369
WT	LR13022419	LR13022419C51	NREMS	-0.243217
WT	LR13022419	LR13022419C52	NREMS	-0.403257
WT	LR13022419	LR13022419C53	NREMS	-0.203126
WT	LR13022419	LR13022419C54	NREMS	-0.332523
WT	LR13022419	LR13022419C55	NREMS	-0.575336
WT	LR13022419	LR13022419C56	NREMS	-0.210033
WT	LR13022419	LR13022419C57	NREMS	-0.108255
WT	LR13022419	LR13022419C58	NREMS	-0.164653
WT	LR13022419	LR13022419C59	NREMS	-0.263564
WT	LR13022419	LR13022419C60	NREMS	-0.602356
WT	LR13022419	LR13022419C61	NREMS	-0.523565
WT	LR13022419	LR13022419C62	NREMS	-0.432564
WT	LR13022419	LR13022419C63	NREMS	-0.672366
WT	LR13022419	LR13022419C01	QW	-0.341256
WT	LR13022419	LR13022419C02	QW	-0.175955
WT	LR13022419	LR13022419C03	QW	-0.453367
WT	LR13022419	LR13022419C04	QW	-0.443512
WT	LR13022419	LR13022419C05	QW	0.231479
WT	LR13022419	LR13022419C06	QW	-0.398
WT	LR13022419	LR13022419C07	QW	-0.262248
WT	LR13022419	LR13022419C08	QW	0.3722
WT	LR13022419	LR13022419C09	QW	-0.208148
WT	LR13022419	LR13022419C10	QW	-0.486321
WT	LR13022419	LR13022419C11	QW	-0.264466
WT	LR13022419	LR13022419C12	QW	-0.285522
WT	LR13022419	LR13022419C13	QW	-0.342159
WT	LR13022419	LR13022419C14	QW	-0.301246
WT	LR13022419	LR13022419C15	QW	0.0158264
WT	LR13022419	LR13022419C16	QW	-0.0134247
WT	LR13022419	LR13022419C17	QW	-0.698785
WT	LR13022419	LR13022419C18	QW	0.100515
WT	LR13022419	LR13022419C19	QW	0.136022
WT	LR13022419	LR13022419C20	QW	-0.353713
WT	LR13022419	LR13022419C21	QW	-0.523201
WT	LR13022419	LR13022419C22	QW	-0.13269
WT	LR13022419	LR13022419C23	QW	-0.432011
WT	LR13022419	LR13022419C24	QW	-0.285301
WT	LR13022419	LR13022419C25	QW	-0.786637
WT	LR13022419	LR13022419C26	QW	-0.213532
WT	LR13022419	LR13022419C27	QW	-0.304025
WT	LR13022419	LR13022419C28	QW	0.230645
WT	LR13022419	LR13022419C29	QW	-0.442386
WT	LR13022419	LR13022419C30	QW	-0.208453
WT	LR13022419	LR13022419C31	QW	-0.11857
WT	LR13022419	LR13022419C32	QW	-0.493215
WT	LR13022419	LR13022419C33	QW	-0.667536
WT	LR13022419	LR13022419C34	QW	0.102346
WT	LR13022419	LR13022419C35	QW	0.0369876
WT	LR13022419	LR13022419C36	QW	0.37739
WT	LR13022419	LR13022419C37	QW	-0.430012
WT	LR13022419	LR13022419C38	QW	-0.627352
WT	LR13022419	LR13022419C39	QW	-0.465387
WT	LR13022419	LR13022419C40	QW	-0.196376
WT	LR13022419	LR13022419C41	QW	-0.298641
WT	LR13022419	LR13022419C42	QW	-0.60486
WT	LR13022419	LR13022419C43	QW	-0.347562
WT	LR13022419	LR13022419C44	QW	-0.252827
WT	LR13022419	LR13022419C45	QW	-0.643321
WT	LR13022419	LR13022419C46	QW	-0.341235
WT	LR13022419	LR13022419C47	QW	-0.407659
WT	LR13022419	LR13022419C48	QW	-0.203147
WT	LR13022419	LR13022419C49	QW	-0.214137
WT	LR13022419	LR13022419C50	QW	0.102325
WT	LR13022419	LR13022419C51	QW	-0.401259
WT	LR13022419	LR13022419C52	QW	-0.383889
WT	LR13022419	LR13022419C53	QW	-0.240237
WT	LR13022419	LR13022419C54	QW	-0.120541
WT	LR13022419	LR13022419C55	QW	-0.653242
WT	LR13022419	LR13022419C56	QW	-0.0123457
WT	LR13022419	LR13022419C57	QW	-0.198198
WT	LR13022419	LR13022419C58	QW	-0.320142
WT	LR13022419	LR13022419C59	QW	-0.452512
WT	LR13022419	LR13022419C60	QW	-0.688675
WT	LR13022419	LR13022419C61	QW	-0.493022
WT	LR13022419	LR13022419C62	QW	-0.493527
WT	LR13022419	LR13022419C63	QW	-0.743353
WT	LR13022419	LR13022419C01	REMS	0.905363
WT	LR13022419	LR13022419C02	REMS	0.453215
WT	LR13022419	LR13022419C03	REMS	0.789637
WT	LR13022419	LR13022419C04	REMS	0.342515
WT	LR13022419	LR13022419C05	REMS	0.658653
WT	LR13022419	LR13022419C06	REMS	0.782056
WT	LR13022419	LR13022419C07	REMS	0.345237
WT	LR13022419	LR13022419C08	REMS	0.685657
WT	LR13022419	LR13022419C09	REMS	0.604445
WT	LR13022419	LR13022419C10	REMS	0.337541
WT	LR13022419	LR13022419C11	REMS	0.453337
WT	LR13022419	LR13022419C12	REMS	-0.102365
WT	LR13022419	LR13022419C13	REMS	0.999877
WT	LR13022419	LR13022419C14	REMS	0.382541
WT	LR13022419	LR13022419C15	REMS	1.20358
WT	LR13022419	LR13022419C16	REMS	0.356856
WT	LR13022419	LR13022419C17	REMS	0.222364
WT	LR13022419	LR13022419C18	REMS	-0.201326
WT	LR13022419	LR13022419C19	REMS	0.555632
WT	LR13022419	LR13022419C20	REMS	0.412332
WT	LR13022419	LR13022419C21	REMS	0.301479
WT	LR13022419	LR13022419C22	REMS	1.02693
WT	LR13022419	LR13022419C23	REMS	0.756352
WT	LR13022419	LR13022419C24	REMS	-0.102363
WT	LR13022419	LR13022419C25	REMS	0.221326
WT	LR13022419	LR13022419C26	REMS	0.342146
WT	LR13022419	LR13022419C27	REMS	0.949564
WT	LR13022419	LR13022419C28	REMS	0.602321
WT	LR13022419	LR13022419C29	REMS	0.185259
WT	LR13022419	LR13022419C30	REMS	0.554222
WT	LR13022419	LR13022419C31	REMS	0.453634
WT	LR13022419	LR13022419C32	REMS	0.120001
WT	LR13022419	LR13022419C33	REMS	0.3021
WT	LR13022419	LR13022419C34	REMS	0.975223
WT	LR13022419	LR13022419C35	REMS	0.241111
WT	LR13022419	LR13022419C36	REMS	0.00142136
WT	LR13022419	LR13022419C37	REMS	0.314897
WT	LR13022419	LR13022419C38	REMS	0.670156
WT	LR13022419	LR13022419C39	REMS	0.193256
WT	LR13022419	LR13022419C40	REMS	0.32012
WT	LR13022419	LR13022419C41	REMS	0.852225
WT	LR13022419	LR13022419C42	REMS	0.230014
WT	LR13022419	LR13022419C43	REMS	0.385242
WT	LR13022419	LR13022419C44	REMS	0.496352
WT	LR13022419	LR13022419C45	REMS	0.241587
WT	LR13022419	LR13022419C46	REMS	0.653242
WT	LR13022419	LR13022419C47	REMS	0.423659
WT	LR13022419	LR13022419C48	REMS	0.0123222
WT	LR13022419	LR13022419C49	REMS	0.145862
WT	LR13022419	LR13022419C50	REMS	0.565359
WT	LR13022419	LR13022419C51	REMS	0.0135897
WT	LR13022419	LR13022419C52	REMS	0.79699
WT	LR13022419	LR13022419C53	REMS	0.10232
WT	LR13022419	LR13022419C54	REMS	0.412536
WT	LR13022419	LR13022419C55	REMS	0.0196785
WT	LR13022419	LR13022419C56	REMS	-0.0123699
WT	LR13022419	LR13022419C57	REMS	0.89699
WT	LR13022419	LR13022419C58	REMS	0.523263
WT	LR13022419	LR13022419C59	REMS	0.145689
WT	LR13022419	LR13022419C60	REMS	0.696988
WT	LR13022419	LR13022419C61	REMS	0.111112
WT	LR13022419	LR13022419C62	REMS	0.193214
WT	LR13022419	LR13022419C63	REMS	0.0150082
WT	LR14022819	LR14022819C01	AW	0.523939
WT	LR14022819	LR14022819C02	AW	1.02252
WT	LR14022819	LR14022819C03	AW	0.295445
WT	LR14022819	LR14022819C04	AW	-0.102589
WT	LR14022819	LR14022819C05	AW	1.60124
WT	LR14022819	LR14022819C06	AW	0.213522
WT	LR14022819	LR14022819C07	AW	0.885242
WT	LR14022819	LR14022819C08	AW	0.5322
WT	LR14022819	LR14022819C09	AW	0.102413
WT	LR14022819	LR14022819C10	AW	1.32202
WT	LR14022819	LR14022819C11	AW	0.452237
WT	LR14022819	LR14022819C12	AW	0.102537
WT	LR14022819	LR14022819C13	AW	0.416913
WT	LR14022819	LR14022819C14	AW	0.357411
WT	LR14022819	LR14022819C15	AW	0.203688
WT	LR14022819	LR14022819C16	AW	-0.102222
WT	LR14022819	LR14022819C17	AW	0.563353
WT	LR14022819	LR14022819C18	AW	2.00337
WT	LR14022819	LR14022819C19	AW	-0.30041
WT	LR14022819	LR14022819C20	AW	0.653324
WT	LR14022819	LR14022819C21	AW	0.372508
WT	LR14022819	LR14022819C22	AW	1.20226
WT	LR14022819	LR14022819C23	AW	-0.0543959
WT	LR14022819	LR14022819C24	AW	0.285526
WT	LR14022819	LR14022819C25	AW	0.224133
WT	LR14022819	LR14022819C26	AW	0.229855
WT	LR14022819	LR14022819C27	AW	0.828184
WT	LR14022819	LR14022819C28	AW	0.45722
WT	LR14022819	LR14022819C29	AW	0.386824
WT	LR14022819	LR14022819C30	AW	0.260784
WT	LR14022819	LR14022819C31	AW	-0.124479
WT	LR14022819	LR14022819C32	AW	1.26858
WT	LR14022819	LR14022819C33	AW	0.241537
WT	LR14022819	LR14022819C34	AW	0.493255
WT	LR14022819	LR14022819C35	AW	0.00369854
WT	LR14022819	LR14022819C01	HAW	0.603146
WT	LR14022819	LR14022819C02	HAW	0.335175
WT	LR14022819	LR14022819C03	HAW	1.09059
WT	LR14022819	LR14022819C04	HAW	-0.0147474
WT	LR14022819	LR14022819C05	HAW	0.625587
WT	LR14022819	LR14022819C06	HAW	0.564235
WT	LR14022819	LR14022819C07	HAW	0.699988
WT	LR14022819	LR14022819C08	HAW	0.144557
WT	LR14022819	LR14022819C09	HAW	1.07854
WT	LR14022819	LR14022819C10	HAW	0.0213325
WT	LR14022819	LR14022819C11	HAW	0.176538
WT	LR14022819	LR14022819C12	HAW	0.886844
WT	LR14022819	LR14022819C13	HAW	0.503664
WT	LR14022819	LR14022819C14	HAW	0.744475
WT	LR14022819	LR14022819C15	HAW	0.351026
WT	LR14022819	LR14022819C16	HAW	-0.102392
WT	LR14022819	LR14022819C17	HAW	0.477897
WT	LR14022819	LR14022819C18	HAW	1.11154
WT	LR14022819	LR14022819C19	HAW	0.365855
WT	LR14022819	LR14022819C20	HAW	0.600252
WT	LR14022819	LR14022819C21	HAW	0.333453
WT	LR14022819	LR14022819C22	HAW	-0.0858543
WT	LR14022819	LR14022819C23	HAW	0.498789
WT	LR14022819	LR14022819C24	HAW	0.574255
WT	LR14022819	LR14022819C25	HAW	0.371748
WT	LR14022819	LR14022819C26	HAW	-0.32001
WT	LR14022819	LR14022819C27	HAW	0.752544
WT	LR14022819	LR14022819C28	HAW	0.335257
WT	LR14022819	LR14022819C29	HAW	0.69699
WT	LR14022819	LR14022819C30	HAW	0.807546
WT	LR14022819	LR14022819C31	HAW	0.285264
WT	LR14022819	LR14022819C32	HAW	1.4721
WT	LR14022819	LR14022819C33	HAW	0.203697
WT	LR14022819	LR14022819C34	HAW	0.699
WT	LR14022819	LR14022819C35	HAW	0.887875
WT	LR14022819	LR14022819C01	NREMS	-0.105855
WT	LR14022819	LR14022819C02	NREMS	-0.332111
WT	LR14022819	LR14022819C03	NREMS	0.885699
WT	LR14022819	LR14022819C04	NREMS	-0.0442222
WT	LR14022819	LR14022819C05	NREMS	-0.554441
WT	LR14022819	LR14022819C06	NREMS	-0.102336
WT	LR14022819	LR14022819C07	NREMS	-0.414566
WT	LR14022819	LR14022819C08	NREMS	-0.212225
WT	LR14022819	LR14022819C09	NREMS	0.0586666
WT	LR14022819	LR14022819C10	NREMS	-0.123223
WT	LR14022819	LR14022819C11	NREMS	-0.352526
WT	LR14022819	LR14022819C12	NREMS	-0.236656
WT	LR14022819	LR14022819C13	NREMS	0.142257
WT	LR14022819	LR14022819C14	NREMS	-0.522226
WT	LR14022819	LR14022819C15	NREMS	-0.103636
WT	LR14022819	LR14022819C16	NREMS	-0.00112233
WT	LR14022819	LR14022819C17	NREMS	-0.793632
WT	LR14022819	LR14022819C18	NREMS	-0.1
WT	LR14022819	LR14022819C19	NREMS	-0.136633
WT	LR14022819	LR14022819C20	NREMS	-0.321142
WT	LR14022819	LR14022819C21	NREMS	-0.202255
WT	LR14022819	LR14022819C22	NREMS	-0.38
WT	LR14022819	LR14022819C23	NREMS	0.000744145
WT	LR14022819	LR14022819C24	NREMS	-0.136326
WT	LR14022819	LR14022819C25	NREMS	-0.375445
WT	LR14022819	LR14022819C26	NREMS	-0.325211
WT	LR14022819	LR14022819C27	NREMS	-0.204457
WT	LR14022819	LR14022819C28	NREMS	-0.0522259
WT	LR14022819	LR14022819C29	NREMS	-0.169963
WT	LR14022819	LR14022819C30	NREMS	-0.396686
WT	LR14022819	LR14022819C31	NREMS	-0.501315
WT	LR14022819	LR14022819C32	NREMS	-0.842256
WT	LR14022819	LR14022819C33	NREMS	-0.00320323
WT	LR14022819	LR14022819C34	NREMS	-0.785859
WT	LR14022819	LR14022819C35	NREMS	-0.144412
WT	LR14022819	LR14022819C01	QW	-0.223352
WT	LR14022819	LR14022819C02	QW	-0.354411
WT	LR14022819	LR14022819C03	QW	-0.20101
WT	LR14022819	LR14022819C04	QW	0.00120015
WT	LR14022819	LR14022819C05	QW	-0.624413
WT	LR14022819	LR14022819C06	QW	0.00101123
WT	LR14022819	LR14022819C07	QW	-0.511114
WT	LR14022819	LR14022819C08	QW	-0.214476
WT	LR14022819	LR14022819C09	QW	0.00110012
WT	LR14022819	LR14022819C10	QW	-0.213532
WT	LR14022819	LR14022819C11	QW	-0.502235
WT	LR14022819	LR14022819C12	QW	-0.396656
WT	LR14022819	LR14022819C13	QW	0.352211
WT	LR14022819	LR14022819C14	QW	-0.147755
WT	LR14022819	LR14022819C15	QW	-0.191133
WT	LR14022819	LR14022819C16	QW	0.192889
WT	LR14022819	LR14022819C17	QW	-0.900385
WT	LR14022819	LR14022819C18	QW	0.0588663
WT	LR14022819	LR14022819C19	QW	0.0758625
WT	LR14022819	LR14022819C20	QW	-0.0300053
WT	LR14022819	LR14022819C21	QW	-0.247878
WT	LR14022819	LR14022819C22	QW	-0.541122
WT	LR14022819	LR14022819C23	QW	-0.214478
WT	LR14022819	LR14022819C24	QW	0.000112312
WT	LR14022819	LR14022819C25	QW	0.114234
WT	LR14022819	LR14022819C26	QW	-0.368556
WT	LR14022819	LR14022819C27	QW	-0.290012
WT	LR14022819	LR14022819C28	QW	0.0456322
WT	LR14022819	LR14022819C29	QW	-0.257478
WT	LR14022819	LR14022819C30	QW	-0.854441
WT	LR14022819	LR14022819C31	QW	-0.6888
WT	LR14022819	LR14022819C32	QW	-0.333355
WT	LR14022819	LR14022819C33	QW	-0.475555
WT	LR14022819	LR14022819C34	QW	-0.992256
WT	LR14022819	LR14022819C35	QW	-0.224411
WT	LR14022819	LR14022819C01	REMS	0.822253
WT	LR14022819	LR14022819C02	REMS	0.401126
WT	LR14022819	LR14022819C03	REMS	-0.00212145
WT	LR14022819	LR14022819C04	REMS	1.23536
WT	LR14022819	LR14022819C05	REMS	0.12001
WT	LR14022819	LR14022819C06	REMS	0.375524
WT	LR14022819	LR14022819C07	REMS	0.20232
WT	LR14022819	LR14022819C08	REMS	0.452212
WT	LR14022819	LR14022819C09	REMS	1.3211
WT	LR14022819	LR14022819C10	REMS	0.1589
WT	LR14022819	LR14022819C11	REMS	0.695589
WT	LR14022819	LR14022819C12	REMS	1.32225
WT	LR14022819	LR14022819C13	REMS	-0.0586321
WT	LR14022819	LR14022819C14	REMS	-0.141555
WT	LR14022819	LR14022819C15	REMS	0.662015
WT	LR14022819	LR14022819C16	REMS	1.16333
WT	LR14022819	LR14022819C17	REMS	0.542221
WT	LR14022819	LR14022819C18	REMS	0.714442
WT	LR14022819	LR14022819C19	REMS	0.395211
WT	LR14022819	LR14022819C20	REMS	0.00120145
WT	LR14022819	LR14022819C21	REMS	0.101121
WT	LR14022819	LR14022819C22	REMS	0.185576
WT	LR14022819	LR14022819C23	REMS	0.355536
WT	LR14022819	LR14022819C24	REMS	-0.147746
WT	LR14022819	LR14022819C25	REMS	0.688855
WT	LR14022819	LR14022819C26	REMS	0.2449
WT	LR14022819	LR14022819C27	REMS	0.835568
WT	LR14022819	LR14022819C28	REMS	0.111252
WT	LR14022819	LR14022819C29	REMS	0.00252257
WT	LR14022819	LR14022819C30	REMS	0.123522
WT	LR14022819	LR14022819C31	REMS	0.0155685
WT	LR14022819	LR14022819C32	REMS	0.587789
WT	LR14022819	LR14022819C33	REMS	0.00336547
WT	LR14022819	LR14022819C34	REMS	0.667242
WT	LR14022819	LR14022819C35	REMS	0.855633
WT	LR16031319	LR16031319C01	AW	0.385222
WT	LR16031319	LR16031319C02	AW	-0.652325
WT	LR16031319	LR16031319C03	AW	0.241636
WT	LR16031319	LR16031319C04	AW	0.0141422
WT	LR16031319	LR16031319C05	AW	0.865211
WT	LR16031319	LR16031319C06	AW	0.354326
WT	LR16031319	LR16031319C07	AW	0.335266
WT	LR16031319	LR16031319C08	AW	0.401252
WT	LR16031319	LR16031319C09	AW	1.02365
WT	LR16031319	LR16031319C10	AW	0.201536
WT	LR16031319	LR16031319C11	AW	0.491254
WT	LR16031319	LR16031319C12	AW	0.107452
WT	LR16031319	LR16031319C13	AW	0.374563
WT	LR16031319	LR16031319C14	AW	0.29697
WT	LR16031319	LR16031319C15	AW	0.869622
WT	LR16031319	LR16031319C16	AW	0.260142
WT	LR16031319	LR16031319C17	AW	0.102337
WT	LR16031319	LR16031319C18	AW	0.904565
WT	LR16031319	LR16031319C19	AW	0.123219
WT	LR16031319	LR16031319C20	AW	-0.378621
WT	LR16031319	LR16031319C21	AW	0.282577
WT	LR16031319	LR16031319C22	AW	0.402326
WT	LR16031319	LR16031319C23	AW	1.11212
WT	LR16031319	LR16031319C24	AW	0.201325
WT	LR16031319	LR16031319C25	AW	0.965875
WT	LR16031319	LR16031319C26	AW	0.888589
WT	LR16031319	LR16031319C27	AW	0.0852567
WT	LR16031319	LR16031319C28	AW	0.333453
WT	LR16031319	LR16031319C29	AW	0.574121
WT	LR16031319	LR16031319C30	AW	0.902323
WT	LR16031319	LR16031319C31	AW	0.316852
WT	LR16031319	LR16031319C32	AW	-0.264213
WT	LR16031319	LR16031319C33	AW	-0.402521
WT	LR16031319	LR16031319C34	AW	0.204015
WT	LR16031319	LR16031319C35	AW	0.0926589
WT	LR16031319	LR16031319C36	AW	-0.536257
WT	LR16031319	LR16031319C37	AW	0.200845
WT	LR16031319	LR16031319C38	AW	1.03866
WT	LR16031319	LR16031319C39	AW	0.104549
WT	LR16031319	LR16031319C40	AW	0.998745
WT	LR16031319	LR16031319C41	AW	0.864153
WT	LR16031319	LR16031319C42	AW	0.334125
WT	LR16031319	LR16031319C43	AW	0.295876
WT	LR16031319	LR16031319C01	HAW	0.456868
WT	LR16031319	LR16031319C02	HAW	0.410261
WT	LR16031319	LR16031319C03	HAW	0.305047
WT	LR16031319	LR16031319C04	HAW	0.275012
WT	LR16031319	LR16031319C05	HAW	0.285552
WT	LR16031319	LR16031319C06	HAW	0.0966666
WT	LR16031319	LR16031319C07	HAW	-0.213699
WT	LR16031319	LR16031319C08	HAW	0.285758
WT	LR16031319	LR16031319C09	HAW	1.25804
WT	LR16031319	LR16031319C10	HAW	0.112879
WT	LR16031319	LR16031319C11	HAW	0.568567
WT	LR16031319	LR16031319C12	HAW	0.301246
WT	LR16031319	LR16031319C13	HAW	0.25522
WT	LR16031319	LR16031319C14	HAW	0.447856
WT	LR16031319	LR16031319C15	HAW	0.893042
WT	LR16031319	LR16031319C16	HAW	0.0853625
WT	LR16031319	LR16031319C17	HAW	-0.186958
WT	LR16031319	LR16031319C18	HAW	1.20416
WT	LR16031319	LR16031319C19	HAW	0.424146
WT	LR16031319	LR16031319C20	HAW	0.389966
WT	LR16031319	LR16031319C21	HAW	0.575821
WT	LR16031319	LR16031319C22	HAW	0.400257
WT	LR16031319	LR16031319C23	HAW	0.453215
WT	LR16031319	LR16031319C24	HAW	0.0145237
WT	LR16031319	LR16031319C25	HAW	0.863324
WT	LR16031319	LR16031319C26	HAW	0.782453
WT	LR16031319	LR16031319C27	HAW	0.201412
WT	LR16031319	LR16031319C28	HAW	0.50586
WT	LR16031319	LR16031319C29	HAW	0.474563
WT	LR16031319	LR16031319C30	HAW	0.753332
WT	LR16031319	LR16031319C31	HAW	0.00425635
WT	LR16031319	LR16031319C32	HAW	0.245362
WT	LR16031319	LR16031319C33	HAW	0.236532
WT	LR16031319	LR16031319C34	HAW	0.402363
WT	LR16031319	LR16031319C35	HAW	0.214448
WT	LR16031319	LR16031319C36	HAW	0.285698
WT	LR16031319	LR16031319C37	HAW	0.5042
WT	LR16031319	LR16031319C38	HAW	0.705853
WT	LR16031319	LR16031319C39	HAW	0.396332
WT	LR16031319	LR16031319C40	HAW	0.990993
WT	LR16031319	LR16031319C41	HAW	0.595524
WT	LR16031319	LR16031319C42	HAW	0.335252
WT	LR16031319	LR16031319C43	HAW	0.100026
WT	LR16031319	LR16031319C01	NREMS	-0.125233
WT	LR16031319	LR16031319C02	NREMS	-0.201451
WT	LR16031319	LR16031319C03	NREMS	-0.132013
WT	LR16031319	LR16031319C04	NREMS	0.102226
WT	LR16031319	LR16031319C05	NREMS	-0.301236
WT	LR16031319	LR16031319C06	NREMS	-0.210323
WT	LR16031319	LR16031319C07	NREMS	-0.145363
WT	LR16031319	LR16031319C08	NREMS	-0.236599
WT	LR16031319	LR16031319C09	NREMS	-0.295367
WT	LR16031319	LR16031319C10	NREMS	-0.236526
WT	LR16031319	LR16031319C11	NREMS	-0.185523
WT	LR16031319	LR16031319C12	NREMS	0.0452556
WT	LR16031319	LR16031319C13	NREMS	-0.302627
WT	LR16031319	LR16031319C14	NREMS	-0.241564
WT	LR16031319	LR16031319C15	NREMS	-0.223585
WT	LR16031319	LR16031319C16	NREMS	-0.201452
WT	LR16031319	LR16031319C17	NREMS	-0.252221
WT	LR16031319	LR16031319C18	NREMS	-0.520365
WT	LR16031319	LR16031319C19	NREMS	-0.185524
WT	LR16031319	LR16031319C20	NREMS	-0.396021
WT	LR16031319	LR16031319C21	NREMS	-0.620233
WT	LR16031319	LR16031319C22	NREMS	-0.145264
WT	LR16031319	LR16031319C23	NREMS	-0.296584
WT	LR16031319	LR16031319C24	NREMS	-0.28757
WT	LR16031319	LR16031319C25	NREMS	-0.223336
WT	LR16031319	LR16031319C26	NREMS	-0.201636
WT	LR16031319	LR16031319C27	NREMS	-0.236544
WT	LR16031319	LR16031319C28	NREMS	-0.523334
WT	LR16031319	LR16031319C29	NREMS	-0.420315
WT	LR16031319	LR16031319C30	NREMS	-0.302322
WT	LR16031319	LR16031319C31	NREMS	-0.247896
WT	LR16031319	LR16031319C32	NREMS	-0.302
WT	LR16031319	LR16031319C33	NREMS	-0.401264
WT	LR16031319	LR16031319C34	NREMS	0.121313
WT	LR16031319	LR16031319C35	NREMS	2.5368e-05
WT	LR16031319	LR16031319C36	NREMS	-0.201547
WT	LR16031319	LR16031319C37	NREMS	-0.0145877
WT	LR16031319	LR16031319C38	NREMS	-0.302155
WT	LR16031319	LR16031319C39	NREMS	-0.302366
WT	LR16031319	LR16031319C40	NREMS	-0.201124
WT	LR16031319	LR16031319C41	NREMS	-0.0321479
WT	LR16031319	LR16031319C42	NREMS	-0.235469
WT	LR16031319	LR16031319C43	NREMS	-0.326601
WT	LR16031319	LR16031319C01	QW	-0.236537
WT	LR16031319	LR16031319C02	QW	-0.272222
WT	LR16031319	LR16031319C03	QW	-0.577783
WT	LR16031319	LR16031319C04	QW	-0.410023
WT	LR16031319	LR16031319C05	QW	-0.254636
WT	LR16031319	LR16031319C06	QW	0.00152364
WT	LR16031319	LR16031319C07	QW	0.401523
WT	LR16031319	LR16031319C08	QW	-0.524478
WT	LR16031319	LR16031319C09	QW	-0.221587
WT	LR16031319	LR16031319C10	QW	-0.345523
WT	LR16031319	LR16031319C11	QW	-0.393325
WT	LR16031319	LR16031319C12	QW	-0.668522
WT	LR16031319	LR16031319C13	QW	0.00123633
WT	LR16031319	LR16031319C14	QW	-0.442855
WT	LR16031319	LR16031319C15	QW	-0.293839
WT	LR16031319	LR16031319C16	QW	-0.274102
WT	LR16031319	LR16031319C17	QW	-0.285524
WT	LR16031319	LR16031319C18	QW	-0.342354
WT	LR16031319	LR16031319C19	QW	-0.396214
WT	LR16031319	LR16031319C20	QW	-0.256363
WT	LR16031319	LR16031319C21	QW	-0.0521365
WT	LR16031319	LR16031319C22	QW	-0.200785
WT	LR16031319	LR16031319C23	QW	-0.196366
WT	LR16031319	LR16031319C24	QW	-0.6602
WT	LR16031319	LR16031319C25	QW	-0.347548
WT	LR16031319	LR16031319C26	QW	-0.293302
WT	LR16031319	LR16031319C27	QW	-0.40521
WT	LR16031319	LR16031319C28	QW	-0.363255
WT	LR16031319	LR16031319C29	QW	-0.321444
WT	LR16031319	LR16031319C30	QW	-0.405632
WT	LR16031319	LR16031319C31	QW	-0.302658
WT	LR16031319	LR16031319C32	QW	-0.401525
WT	LR16031319	LR16031319C33	QW	0.252136
WT	LR16031319	LR16031319C34	QW	0.00758889
WT	LR16031319	LR16031319C35	QW	0.00605061
WT	LR16031319	LR16031319C36	QW	-0.352145
WT	LR16031319	LR16031319C37	QW	-0.00236326
WT	LR16031319	LR16031319C38	QW	-0.201159
WT	LR16031319	LR16031319C39	QW	-0.504869
WT	LR16031319	LR16031319C40	QW	-0.274564
WT	LR16031319	LR16031319C41	QW	-0.182552
WT	LR16031319	LR16031319C42	QW	-0.302523
WT	LR16031319	LR16031319C43	QW	-0.477896
WT	LR16031319	LR16031319C01	REMS	0.402312
WT	LR16031319	LR16031319C02	REMS	0.906633
WT	LR16031319	LR16031319C03	REMS	0.236466
WT	LR16031319	LR16031319C04	REMS	0.504411
WT	LR16031319	LR16031319C05	REMS	1.15256
WT	LR16031319	LR16031319C06	REMS	0.675234
WT	LR16031319	LR16031319C07	REMS	0.00321368
WT	LR16031319	LR16031319C08	REMS	0.358687
WT	LR16031319	LR16031319C09	REMS	0.0686532
WT	LR16031319	LR16031319C10	REMS	0.4237
WT	LR16031319	LR16031319C11	REMS	1.20253
WT	LR16031319	LR16031319C12	REMS	0.240137
WT	LR16031319	LR16031319C13	REMS	-0.401366
WT	LR16031319	LR16031319C14	REMS	0.504664
WT	LR16031319	LR16031319C15	REMS	1.10211
WT	LR16031319	LR16031319C16	REMS	0.505876
WT	LR16031319	LR16031319C17	REMS	0.369365
WT	LR16031319	LR16031319C18	REMS	0.0253637
WT	LR16031319	LR16031319C19	REMS	0.401254
WT	LR16031319	LR16031319C20	REMS	0.343445
WT	LR16031319	LR16031319C21	REMS	1.48522
WT	LR16031319	LR16031319C22	REMS	0.410232
WT	LR16031319	LR16031319C23	REMS	0.333354
WT	LR16031319	LR16031319C24	REMS	0.342563
WT	LR16031319	LR16031319C25	REMS	0.521452
WT	LR16031319	LR16031319C26	REMS	0.241514
WT	LR16031319	LR16031319C27	REMS	0.752366
WT	LR16031319	LR16031319C28	REMS	0.423223
WT	LR16031319	LR16031319C29	REMS	0.203133
WT	LR16031319	LR16031319C30	REMS	0.401254
WT	LR16031319	LR16031319C31	REMS	0.504244
WT	LR16031319	LR16031319C32	REMS	0.193547
WT	LR16031319	LR16031319C33	REMS	1.35225
WT	LR16031319	LR16031319C34	REMS	0.496359
WT	LR16031319	LR16031319C35	REMS	1.20141
WT	LR16031319	LR16031319C36	REMS	0.335465
WT	LR16031319	LR16031319C37	REMS	0.401522
WT	LR16031319	LR16031319C38	REMS	0.00213211
WT	LR16031319	LR16031319C39	REMS	0.241414
WT	LR16031319	LR16031319C40	REMS	0.0636296
WT	LR16031319	LR16031319C41	REMS	0.345231
WT	LR16031319	LR16031319C42	REMS	-0.102369
WT	LR16031319	LR16031319C43	REMS	0.968858
NC	LR00062218	LR00062218C01	AW	0.691968
NC	LR00062218	LR00062218C02	AW	0.720024
NC	LR00062218	LR00062218C03	AW	0.253456
NC	LR00062218	LR00062218C04	AW	-0.113222
NC	LR00062218	LR00062218C05	AW	0.304051
NC	LR00062218	LR00062218C06	AW	0.702686
NC	LR00062218	LR00062218C07	AW	1.08552
NC	LR00062218	LR00062218C08	AW	0.583215
NC	LR00062218	LR00062218C09	AW	0.142574
NC	LR00062218	LR00062218C10	AW	0.208563
NC	LR00062218	LR00062218C11	AW	0.375256
NC	LR00062218	LR00062218C12	AW	0.225153
NC	LR00062218	LR00062218C13	AW	0.211372
NC	LR00062218	LR00062218C14	AW	-0.187548
NC	LR00062218	LR00062218C15	AW	0.635742
NC	LR00062218	LR00062218C16	AW	-0.357412
NC	LR00062218	LR00062218C17	AW	0.574578
NC	LR00062218	LR00062218C18	AW	0.205875
NC	LR00062218	LR00062218C19	AW	0.00650741
NC	LR00062218	LR00062218C20	AW	0.75222
NC	LR00062218	LR00062218C21	AW	0.821115
NC	LR00062218	LR00062218C22	AW	0.110022
NC	LR00062218	LR00062218C23	AW	0.14559
NC	LR00062218	LR00062218C24	AW	0.432148
NC	LR00062218	LR00062218C25	AW	0.405237
NC	LR00062218	LR00062218C26	AW	1.23552
NC	LR00062218	LR00062218C27	AW	0.401122
NC	LR00062218	LR00062218C01	EC	0.700422
NC	LR00062218	LR00062218C02	EC	0.595792
NC	LR00062218	LR00062218C03	EC	0.314208
NC	LR00062218	LR00062218C04	EC	0.2575
NC	LR00062218	LR00062218C05	EC	0.896434
NC	LR00062218	LR00062218C06	EC	-0.130306
NC	LR00062218	LR00062218C07	EC	0.358103
NC	LR00062218	LR00062218C08	EC	0.41801
NC	LR00062218	LR00062218C09	EC	1.6462
NC	LR00062218	LR00062218C10	EC	0.927967
NC	LR00062218	LR00062218C11	EC	0.198592
NC	LR00062218	LR00062218C12	EC	0.348474
NC	LR00062218	LR00062218C13	EC	-0.0285083
NC	LR00062218	LR00062218C14	EC	0.389988
NC	LR00062218	LR00062218C15	EC	0.912961
NC	LR00062218	LR00062218C16	EC	0.742625
NC	LR00062218	LR00062218C17	EC	0.557649
NC	LR00062218	LR00062218C18	EC	0.980019
NC	LR00062218	LR00062218C19	EC	0.806289
NC	LR00062218	LR00062218C20	EC	0.829281
NC	LR00062218	LR00062218C21	EC	0.482826
NC	LR00062218	LR00062218C22	EC	0.657201
NC	LR00062218	LR00062218C23	EC	0.305198
NC	LR00062218	LR00062218C24	EC	0.931183
NC	LR00062218	LR00062218C25	EC	0.764227
NC	LR00062218	LR00062218C26	EC	0.0639588
NC	LR00062218	LR00062218C27	EC	0.281952
NC	LR00062218	LR00062218C01	HAW	1.17415
NC	LR00062218	LR00062218C02	HAW	0.863575
NC	LR00062218	LR00062218C03	HAW	0.652415
NC	LR00062218	LR00062218C04	HAW	0.704524
NC	LR00062218	LR00062218C05	HAW	0.207522
NC	LR00062218	LR00062218C06	HAW	1.75224
NC	LR00062218	LR00062218C07	HAW	-0.0241742
NC	LR00062218	LR00062218C08	HAW	0.674442
NC	LR00062218	LR00062218C09	HAW	0.732526
NC	LR00062218	LR00062218C10	HAW	0.804125
NC	LR00062218	LR00062218C11	HAW	0.314242
NC	LR00062218	LR00062218C12	HAW	0.389633
NC	LR00062218	LR00062218C13	HAW	-0.0321453
NC	LR00062218	LR00062218C14	HAW	0.741
NC	LR00062218	LR00062218C15	HAW	0.558256
NC	LR00062218	LR00062218C16	HAW	0.403832
NC	LR00062218	LR00062218C17	HAW	0.420142
NC	LR00062218	LR00062218C18	HAW	0.60805
NC	LR00062218	LR00062218C19	HAW	0.532325
NC	LR00062218	LR00062218C20	HAW	0.736585
NC	LR00062218	LR00062218C21	HAW	0.67412
NC	LR00062218	LR00062218C22	HAW	0.0021008
NC	LR00062218	LR00062218C23	HAW	0.800742
NC	LR00062218	LR00062218C24	HAW	1.20412
NC	LR00062218	LR00062218C25	HAW	1.42157
NC	LR00062218	LR00062218C26	HAW	0.601212
NC	LR00062218	LR00062218C27	HAW	0.387969
NC	LR00062218	LR00062218C01	NREMS	-0.592234
NC	LR00062218	LR00062218C02	NREMS	-0.374411
NC	LR00062218	LR00062218C03	NREMS	-0.502365
NC	LR00062218	LR00062218C04	NREMS	-0.452232
NC	LR00062218	LR00062218C05	NREMS	-0.252363
NC	LR00062218	LR00062218C06	NREMS	-0.245856
NC	LR00062218	LR00062218C07	NREMS	-0.204252
NC	LR00062218	LR00062218C08	NREMS	-0.475253
NC	LR00062218	LR00062218C09	NREMS	-0.39697
NC	LR00062218	LR00062218C10	NREMS	-0.11232
NC	LR00062218	LR00062218C11	NREMS	-0.114533
NC	LR00062218	LR00062218C12	NREMS	-0.354521
NC	LR00062218	LR00062218C13	NREMS	0.905886
NC	LR00062218	LR00062218C14	NREMS	-0.400363
NC	LR00062218	LR00062218C15	NREMS	-0.400142
NC	LR00062218	LR00062218C16	NREMS	-0.502203
NC	LR00062218	LR00062218C17	NREMS	-0.289659
NC	LR00062218	LR00062218C18	NREMS	-0.504412
NC	LR00062218	LR00062218C19	NREMS	-0.263525
NC	LR00062218	LR00062218C20	NREMS	-0.386575
NC	LR00062218	LR00062218C21	NREMS	-0.496358
NC	LR00062218	LR00062218C22	NREMS	-0.29637
NC	LR00062218	LR00062218C23	NREMS	-0.222456
NC	LR00062218	LR00062218C24	NREMS	-0.671759
NC	LR00062218	LR00062218C25	NREMS	-0.468574
NC	LR00062218	LR00062218C26	NREMS	-0.201588
NC	LR00062218	LR00062218C27	NREMS	0.735689
NC	LR00062218	LR00062218C01	QW	-0.377785
NC	LR00062218	LR00062218C02	QW	-0.521145
NC	LR00062218	LR00062218C03	QW	-0.661589
NC	LR00062218	LR00062218C04	QW	0.0147654
NC	LR00062218	LR00062218C05	QW	-0.339866
NC	LR00062218	LR00062218C06	QW	-0.401125
NC	LR00062218	LR00062218C07	QW	-0.115325
NC	LR00062218	LR00062218C08	QW	-0.457553
NC	LR00062218	LR00062218C09	QW	-0.304563
NC	LR00062218	LR00062218C10	QW	-0.186333
NC	LR00062218	LR00062218C11	QW	-0.0420154
NC	LR00062218	LR00062218C12	QW	-0.332011
NC	LR00062218	LR00062218C13	QW	-0.105064
NC	LR00062218	LR00062218C14	QW	-0.278524
NC	LR00062218	LR00062218C15	QW	-0.504745
NC	LR00062218	LR00062218C16	QW	-0.666856
NC	LR00062218	LR00062218C17	QW	0.104741
NC	LR00062218	LR00062218C18	QW	-0.438525
NC	LR00062218	LR00062218C19	QW	-0.332478
NC	LR00062218	LR00062218C20	QW	-0.311112
NC	LR00062218	LR00062218C21	QW	-0.409
NC	LR00062218	LR00062218C22	QW	0.138581
NC	LR00062218	LR00062218C23	QW	-0.287533
NC	LR00062218	LR00062218C24	QW	-0.699912
NC	LR00062218	LR00062218C25	QW	-0.604424
NC	LR00062218	LR00062218C26	QW	0.185552
NC	LR00062218	LR00062218C27	QW	-0.302878
NC	LR00062218	LR00062218C01	REMS	0.405744
NC	LR00062218	LR00062218C02	REMS	1.88209
NC	LR00062218	LR00062218C03	REMS	0.105434
NC	LR00062218	LR00062218C04	REMS	0.999877
NC	LR00062218	LR00062218C05	REMS	0.204016
NC	LR00062218	LR00062218C06	REMS	0.886724
NC	LR00062218	LR00062218C07	REMS	0.305714
NC	LR00062218	LR00062218C08	REMS	-0.268789
NC	LR00062218	LR00062218C09	REMS	-0.0966325
NC	LR00062218	LR00062218C10	REMS	-0.222215
NC	LR00062218	LR00062218C11	REMS	1.05777
NC	LR00062218	LR00062218C12	REMS	0.74567
NC	LR00062218	LR00062218C13	REMS	-0.435001
NC	LR00062218	LR00062218C14	REMS	-0.302445
NC	LR00062218	LR00062218C15	REMS	-0.1905
NC	LR00062218	LR00062218C16	REMS	-0.705366
NC	LR00062218	LR00062218C17	REMS	0.213224
NC	LR00062218	LR00062218C18	REMS	0.643353
NC	LR00062218	LR00062218C19	REMS	0.698789
NC	LR00062218	LR00062218C20	REMS	0.753333
NC	LR00062218	LR00062218C21	REMS	0.00342852
NC	LR00062218	LR00062218C22	REMS	-0.24587
NC	LR00062218	LR00062218C23	REMS	-0.520012
NC	LR00062218	LR00062218C24	REMS	0.175686
NC	LR00062218	LR00062218C25	REMS	-0.0288554
NC	LR00062218	LR00062218C26	REMS	0.999256
NC	LR00062218	LR00062218C27	REMS	0.303321
NC	LR00062218	LR00062218C01	SC	-0.372001
NC	LR00062218	LR00062218C02	SC	0.0450743
NC	LR00062218	LR00062218C03	SC	0.469268
NC	LR00062218	LR00062218C04	SC	0.0725353
NC	LR00062218	LR00062218C05	SC	0.0531522
NC	LR00062218	LR00062218C06	SC	-0.62536
NC	LR00062218	LR00062218C07	SC	-0.393628
NC	LR00062218	LR00062218C08	SC	-0.280679
NC	LR00062218	LR00062218C09	SC	0.0823103
NC	LR00062218	LR00062218C10	SC	-0.292505
NC	LR00062218	LR00062218C11	SC	0.0735001
NC	LR00062218	LR00062218C12	SC	-0.317034
NC	LR00062218	LR00062218C13	SC	0.934893
NC	LR00062218	LR00062218C14	SC	0.847849
NC	LR00062218	LR00062218C15	SC	-0.502862
NC	LR00062218	LR00062218C16	SC	-0.278455
NC	LR00062218	LR00062218C17	SC	0.276822
NC	LR00062218	LR00062218C18	SC	0.0156009
NC	LR00062218	LR00062218C19	SC	-0.193043
NC	LR00062218	LR00062218C20	SC	-0.201573
NC	LR00062218	LR00062218C21	SC	0.088976
NC	LR00062218	LR00062218C22	SC	-0.0904919
NC	LR00062218	LR00062218C23	SC	-0.14781
NC	LR00062218	LR00062218C24	SC	-0.356918
NC	LR00062218	LR00062218C25	SC	-0.188544
NC	LR00062218	LR00062218C26	SC	0.306364
NC	LR00062218	LR00062218C27	SC	0.74479
NC	LR01062918	LR01062218C01	AW	0.165596
NC	LR01062918	LR01062218C02	AW	0.997929
NC	LR01062918	LR01062218C03	AW	0.928691
NC	LR01062918	LR01062218C04	AW	0.201355
NC	LR01062918	LR01062218C05	AW	0.257295
NC	LR01062918	LR01062218C06	AW	0.825845
NC	LR01062918	LR01062218C07	AW	0.0729933
NC	LR01062918	LR01062218C08	AW	0.806624
NC	LR01062918	LR01062218C09	AW	-0.115859
NC	LR01062918	LR01062218C10	AW	0.606816
NC	LR01062918	LR01062218C11	AW	0.208609
NC	LR01062918	LR01062218C12	AW	0.583526
NC	LR01062918	LR01062218C13	AW	1.21742
NC	LR01062918	LR01062218C14	AW	0.575974
NC	LR01062918	LR01062218C15	AW	0.603412
NC	LR01062918	LR01062218C16	AW	0.367147
NC	LR01062918	LR01062218C17	AW	0.695093
NC	LR01062918	LR01062218C18	AW	0.126132
NC	LR01062918	LR01062218C19	AW	0.085546
NC	LR01062918	LR01062218C20	AW	0.113993
NC	LR01062918	LR01062218C21	AW	0.738908
NC	LR01062918	LR01062218C22	AW	0.0972828
NC	LR01062918	LR01062218C23	AW	0.459202
NC	LR01062918	LR01062218C24	AW	1.2135
NC	LR01062918	LR01062218C25	AW	0.269938
NC	LR01062918	LR01062218C26	AW	0.888619
NC	LR01062918	LR01062218C27	AW	1.11008
NC	LR01062918	LR01062218C28	AW	0.38039
NC	LR01062918	LR01062218C29	AW	0.476637
NC	LR01062918	LR01062218C30	AW	0.603121
NC	LR01062918	LR01062218C31	AW	0.00811245
NC	LR01062918	LR01062218C32	AW	0.0894118
NC	LR01062918	LR01062218C33	AW	0.688161
NC	LR01062918	LR01062218C34	AW	0.0323964
NC	LR01062918	LR01062218C35	AW	0.0129045
NC	LR01062918	LR01062218C01	HAW	0.660868
NC	LR01062918	LR01062218C02	HAW	0.890401
NC	LR01062918	LR01062218C03	HAW	0.77569
NC	LR01062918	LR01062218C04	HAW	0.886142
NC	LR01062918	LR01062218C05	HAW	0.754123
NC	LR01062918	LR01062218C06	HAW	0.753365
NC	LR01062918	LR01062218C07	HAW	0.569651
NC	LR01062918	LR01062218C08	HAW	0.024357
NC	LR01062918	LR01062218C09	HAW	0.581843
NC	LR01062918	LR01062218C10	HAW	0.557962
NC	LR01062918	LR01062218C11	HAW	0.717259
NC	LR01062918	LR01062218C12	HAW	0.664236
NC	LR01062918	LR01062218C13	HAW	1.2436
NC	LR01062918	LR01062218C14	HAW	0.247025
NC	LR01062918	LR01062218C15	HAW	0.713066
NC	LR01062918	LR01062218C16	HAW	0.232508
NC	LR01062918	LR01062218C17	HAW	0.695452
NC	LR01062918	LR01062218C18	HAW	0.327222
NC	LR01062918	LR01062218C19	HAW	0.474071
NC	LR01062918	LR01062218C20	HAW	0.180673
NC	LR01062918	LR01062218C21	HAW	1.1937
NC	LR01062918	LR01062218C22	HAW	0.173293
NC	LR01062918	LR01062218C23	HAW	0.689406
NC	LR01062918	LR01062218C24	HAW	2.2411
NC	LR01062918	LR01062218C25	HAW	0.531448
NC	LR01062918	LR01062218C26	HAW	0.468838
NC	LR01062918	LR01062218C27	HAW	0.688013
NC	LR01062918	LR01062218C28	HAW	1.29387
NC	LR01062918	LR01062218C29	HAW	0.0184538
NC	LR01062918	LR01062218C30	HAW	0.820645
NC	LR01062918	LR01062218C31	HAW	0.256679
NC	LR01062918	LR01062218C32	HAW	1.37613
NC	LR01062918	LR01062218C33	HAW	0.408128
NC	LR01062918	LR01062218C34	HAW	0.976673
NC	LR01062918	LR01062218C35	HAW	0.262827
NC	LR01062918	LR01062218C01	NREMS	-0.168873
NC	LR01062918	LR01062218C02	NREMS	-0.0593014
NC	LR01062918	LR01062218C03	NREMS	-0.31341
NC	LR01062918	LR01062218C04	NREMS	-0.263491
NC	LR01062918	LR01062218C05	NREMS	-0.10514
NC	LR01062918	LR01062218C06	NREMS	-0.275694
NC	LR01062918	LR01062218C07	NREMS	-0.255975
NC	LR01062918	LR01062218C08	NREMS	-0.358601
NC	LR01062918	LR01062218C09	NREMS	-0.214242
NC	LR01062918	LR01062218C10	NREMS	-0.309786
NC	LR01062918	LR01062218C11	NREMS	-0.445214
NC	LR01062918	LR01062218C12	NREMS	-0.391221
NC	LR01062918	LR01062218C13	NREMS	-0.196372
NC	LR01062918	LR01062218C14	NREMS	0.141849
NC	LR01062918	LR01062218C15	NREMS	-0.36887
NC	LR01062918	LR01062218C16	NREMS	-0.595508
NC	LR01062918	LR01062218C17	NREMS	-0.134074
NC	LR01062918	LR01062218C18	NREMS	0.0147211
NC	LR01062918	LR01062218C19	NREMS	0.708072
NC	LR01062918	LR01062218C20	NREMS	-0.262183
NC	LR01062918	LR01062218C21	NREMS	-0.178372
NC	LR01062918	LR01062218C22	NREMS	0.000175098
NC	LR01062918	LR01062218C23	NREMS	-0.193776
NC	LR01062918	LR01062218C24	NREMS	0.0336451
NC	LR01062918	LR01062218C25	NREMS	-0.283937
NC	LR01062918	LR01062218C26	NREMS	-0.186223
NC	LR01062918	LR01062218C27	NREMS	-0.168876
NC	LR01062918	LR01062218C28	NREMS	-0.438531
NC	LR01062918	LR01062218C29	NREMS	-0.179807
NC	LR01062918	LR01062218C30	NREMS	-0.422351
NC	LR01062918	LR01062218C31	NREMS	-0.531582
NC	LR01062918	LR01062218C32	NREMS	-0.355982
NC	LR01062918	LR01062218C33	NREMS	-0.473217
NC	LR01062918	LR01062218C34	NREMS	-0.0725655
NC	LR01062918	LR01062218C35	NREMS	-0.479745
NC	LR01062918	LR01062218C01	QW	-0.433655
NC	LR01062918	LR01062218C02	QW	-0.182324
NC	LR01062918	LR01062218C03	QW	-0.378266
NC	LR01062918	LR01062218C04	QW	-0.210752
NC	LR01062918	LR01062218C05	QW	-0.266515
NC	LR01062918	LR01062218C06	QW	-0.301784
NC	LR01062918	LR01062218C07	QW	0.146268
NC	LR01062918	LR01062218C08	QW	-0.423197
NC	LR01062918	LR01062218C09	QW	-0.141692
NC	LR01062918	LR01062218C10	QW	-0.64303
NC	LR01062918	LR01062218C11	QW	0.0771242
NC	LR01062918	LR01062218C12	QW	-0.307669
NC	LR01062918	LR01062218C13	QW	0.0722817
NC	LR01062918	LR01062218C14	QW	0.099115
NC	LR01062918	LR01062218C15	QW	-0.58732
NC	LR01062918	LR01062218C16	QW	-0.238727
NC	LR01062918	LR01062218C17	QW	-0.353176
NC	LR01062918	LR01062218C18	QW	0.10391
NC	LR01062918	LR01062218C19	QW	-0.537012
NC	LR01062918	LR01062218C20	QW	-0.452711
NC	LR01062918	LR01062218C21	QW	0.183569
NC	LR01062918	LR01062218C22	QW	0.191881
NC	LR01062918	LR01062218C23	QW	-0.466836
NC	LR01062918	LR01062218C24	QW	0.146142
NC	LR01062918	LR01062218C25	QW	-0.204514
NC	LR01062918	LR01062218C26	QW	-0.279915
NC	LR01062918	LR01062218C27	QW	0.0318451
NC	LR01062918	LR01062218C28	QW	-0.563982
NC	LR01062918	LR01062218C29	QW	-0.256392
NC	LR01062918	LR01062218C30	QW	-0.572042
NC	LR01062918	LR01062218C31	QW	0.00247448
NC	LR01062918	LR01062218C32	QW	0.0568173
NC	LR01062918	LR01062218C33	QW	-0.64428
NC	LR01062918	LR01062218C34	QW	-0.128438
NC	LR01062918	LR01062218C35	QW	-0.641511
NC	LR01062918	LR01062218C01	REMS	0.24842
NC	LR01062918	LR01062218C02	REMS	0.990872
NC	LR01062918	LR01062218C03	REMS	0.331327
NC	LR01062918	LR01062218C04	REMS	0.206657
NC	LR01062918	LR01062218C05	REMS	0.819332
NC	LR01062918	LR01062218C06	REMS	0.16262
NC	LR01062918	LR01062218C07	REMS	0.159333
NC	LR01062918	LR01062218C08	REMS	0.118501
NC	LR01062918	LR01062218C09	REMS	0.0441719
NC	LR01062918	LR01062218C10	REMS	0.258816
NC	LR01062918	LR01062218C11	REMS	1.20421
NC	LR01062918	LR01062218C12	REMS	0.319091
NC	LR01062918	LR01062218C13	REMS	0.0474908
NC	LR01062918	LR01062218C14	REMS	0.431792
NC	LR01062918	LR01062218C15	REMS	0.264958
NC	LR01062918	LR01062218C16	REMS	0.229898
NC	LR01062918	LR01062218C17	REMS	0.283378
NC	LR01062918	LR01062218C18	REMS	1.04336
NC	LR01062918	LR01062218C19	REMS	-0.311856
NC	LR01062918	LR01062218C20	REMS	0.439626
NC	LR01062918	LR01062218C21	REMS	0.356753
NC	LR01062918	LR01062218C22	REMS	0.119564
NC	LR01062918	LR01062218C23	REMS	0.113021
NC	LR01062918	LR01062218C24	REMS	0.347405
NC	LR01062918	LR01062218C25	REMS	0.00297996
NC	LR01062918	LR01062218C26	REMS	0.34324
NC	LR01062918	LR01062218C27	REMS	1.60987
NC	LR01062918	LR01062218C28	REMS	0.306595
NC	LR01062918	LR01062218C29	REMS	0.352249
NC	LR01062918	LR01062218C30	REMS	0.115051
NC	LR01062918	LR01062218C31	REMS	1.60456
NC	LR01062918	LR01062218C32	REMS	0.597962
NC	LR01062918	LR01062218C33	REMS	0.34605
NC	LR01062918	LR01062218C34	REMS	0.241184
NC	LR01062918	LR01062218C35	REMS	0.797053
NC	LR01062918	LR01062218C01	SC	1.2439
NC	LR01062918	LR01062218C02	SC	-0.411342
NC	LR01062918	LR01062218C03	SC	-0.0530892
NC	LR01062918	LR01062218C04	SC	-0.24496
NC	LR01062918	LR01062218C05	SC	-0.161181
NC	LR01062918	LR01062218C06	SC	-0.236981
NC	LR01062918	LR01062218C07	SC	0.161023
NC	LR01062918	LR01062218C08	SC	0.0950671
NC	LR01062918	LR01062218C09	SC	0.984961
NC	LR01062918	LR01062218C10	SC	0.00114743
NC	LR01062918	LR01062218C11	SC	0.170799
NC	LR01062918	LR01062218C12	SC	0.174571
NC	LR01062918	LR01062218C13	SC	-0.0366342
NC	LR01062918	LR01062218C14	SC	0.218047
NC	LR01062918	LR01062218C15	SC	-0.444104
NC	LR01062918	LR01062218C16	SC	0.00380189
NC	LR01062918	LR01062218C17	SC	-0.18202
NC	LR01062918	LR01062218C18	SC	-0.788477
NC	LR01062918	LR01062218C19	SC	0.653715
NC	LR01062918	LR01062218C20	SC	0.106712
NC	LR01062918	LR01062218C21	SC	0.108009
NC	LR01062918	LR01062218C22	SC	0.0701514
NC	LR01062918	LR01062218C23	SC	-0.196765
NC	LR01062918	LR01062218C24	SC	0.0513008
NC	LR01062918	LR01062218C25	SC	0.0743162
NC	LR01062918	LR01062218C26	SC	-0.28051
NC	LR01062918	LR01062218C27	SC	0.192232
NC	LR01062918	LR01062218C28	SC	0.0137018
NC	LR01062918	LR01062218C29	SC	0.00691802
NC	LR01062918	LR01062218C30	SC	0.00730004
NC	LR01062918	LR01062218C31	SC	-0.387565
NC	LR01062918	LR01062218C32	SC	-0.195737
NC	LR01062918	LR01062218C33	SC	-0.381892
NC	LR01062918	LR01062218C34	SC	0.0100546
NC	LR01062918	LR01062218C35	SC	-0.313156
NC	LR01062918	LR01062218C01	EC	0.0621337
NC	LR01062918	LR01062218C02	EC	1.05034
NC	LR01062918	LR01062218C03	EC	0.770161
NC	LR01062918	LR01062218C04	EC	0.86788
NC	LR01062918	LR01062218C05	EC	-0.328401
NC	LR01062918	LR01062218C06	EC	0.0675525
NC	LR01062918	LR01062218C07	EC	0.48342
NC	LR01062918	LR01062218C08	EC	0.0986201
NC	LR01062918	LR01062218C09	EC	-0.150251
NC	LR01062918	LR01062218C10	EC	0.128678
NC	LR01062918	LR01062218C11	EC	-0.139959
NC	LR01062918	LR01062218C12	EC	0.887352
NC	LR01062918	LR01062218C13	EC	0.528485
NC	LR01062918	LR01062218C14	EC	1.20159
NC	LR01062918	LR01062218C15	EC	0.638853
NC	LR01062918	LR01062218C16	EC	0.120601
NC	LR01062918	LR01062218C17	EC	-0.241417
NC	LR01062918	LR01062218C18	EC	0.215873
NC	LR01062918	LR01062218C19	EC	-0.385506
NC	LR01062918	LR01062218C20	EC	0.821996
NC	LR01062918	LR01062218C21	EC	0.178085
NC	LR01062918	LR01062218C22	EC	0.257861
NC	LR01062918	LR01062218C23	EC	0.404799
NC	LR01062918	LR01062218C24	EC	1.20089
NC	LR01062918	LR01062218C25	EC	0.818507
NC	LR01062918	LR01062218C26	EC	-0.225288
NC	LR01062918	LR01062218C27	EC	0.275541
NC	LR01062918	LR01062218C28	EC	0.382623
NC	LR01062918	LR01062218C29	EC	0.931273
NC	LR01062918	LR01062218C30	EC	0.355752
NC	LR01062918	LR01062218C31	EC	0.192459
NC	LR01062918	LR01062218C32	EC	1.58094
NC	LR01062918	LR01062218C33	EC	0.249214
NC	LR01062918	LR01062218C34	EC	0.329427
NC	LR01062918	LR01062218C35	EC	0.220708
NC	LR02082418	LR02082418C01	AW	-0.0464999
NC	LR02082418	LR02082418C02	AW	-0.102851
NC	LR02082418	LR02082418C03	AW	-0.03684
NC	LR02082418	LR02082418C04	AW	-0.0121763
NC	LR02082418	LR02082418C05	AW	0.0703316
NC	LR02082418	LR02082418C06	AW	0.484237
NC	LR02082418	LR02082418C07	AW	0.211692
NC	LR02082418	LR02082418C08	AW	-0.175458
NC	LR02082418	LR02082418C09	AW	-0.00304575
NC	LR02082418	LR02082418C10	AW	0.273639
NC	LR02082418	LR02082418C11	AW	0.566031
NC	LR02082418	LR02082418C12	AW	0.743828
NC	LR02082418	LR02082418C13	AW	1.12904
NC	LR02082418	LR02082418C14	AW	0.41553
NC	LR02082418	LR02082418C15	AW	0.266444
NC	LR02082418	LR02082418C16	AW	0.406956
NC	LR02082418	LR02082418C17	AW	-0.241298
NC	LR02082418	LR02082418C18	AW	0.382954
NC	LR02082418	LR02082418C19	AW	0.147258
NC	LR02082418	LR02082418C20	AW	0.914391
NC	LR02082418	LR02082418C21	AW	0.415228
NC	LR02082418	LR02082418C22	AW	-0.872814
NC	LR02082418	LR02082418C23	AW	0.485734
NC	LR02082418	LR02082418C24	AW	1.29179
NC	LR02082418	LR02082418C25	AW	1.23105
NC	LR02082418	LR02082418C26	AW	0.474902
NC	LR02082418	LR02082418C27	AW	0.378769
NC	LR02082418	LR02082418C28	AW	-0.283628
NC	LR02082418	LR02082418C29	AW	-0.139933
NC	LR02082418	LR02082418C30	AW	1.53651
NC	LR02082418	LR02082418C31	AW	0.0979775
NC	LR02082418	LR02082418C32	AW	1.30739
NC	LR02082418	LR02082418C33	AW	0.781521
NC	LR02082418	LR02082418C34	AW	0.546769
NC	LR02082418	LR02082418C35	AW	0.457137
NC	LR02082418	LR02082418C36	AW	-0.0961219
NC	LR02082418	LR02082418C37	AW	0.523303
NC	LR02082418	LR02082418C38	AW	-0.235278
NC	LR02082418	LR02082418C39	AW	1.05919
NC	LR02082418	LR02082418C40	AW	1.19159
NC	LR02082418	LR02082418C41	AW	0.285737
NC	LR02082418	LR02082418C42	AW	0.0446559
NC	LR02082418	LR02082418C43	AW	0.904979
NC	LR02082418	LR02082418C44	AW	0.932571
NC	LR02082418	LR02082418C01	HAW	-0.0924681
NC	LR02082418	LR02082418C02	HAW	-0.217043
NC	LR02082418	LR02082418C03	HAW	0.134019
NC	LR02082418	LR02082418C04	HAW	1.26417
NC	LR02082418	LR02082418C05	HAW	0.945948
NC	LR02082418	LR02082418C06	HAW	1.40755
NC	LR02082418	LR02082418C07	HAW	0.709897
NC	LR02082418	LR02082418C08	HAW	-0.222461
NC	LR02082418	LR02082418C09	HAW	-0.204543
NC	LR02082418	LR02082418C10	HAW	1.27652
NC	LR02082418	LR02082418C11	HAW	1.02398
NC	LR02082418	LR02082418C12	HAW	0.310128
NC	LR02082418	LR02082418C13	HAW	0.601019
NC	LR02082418	LR02082418C14	HAW	1.35258
NC	LR02082418	LR02082418C15	HAW	-0.45489
NC	LR02082418	LR02082418C16	HAW	1.14814
NC	LR02082418	LR02082418C17	HAW	-0.289709
NC	LR02082418	LR02082418C18	HAW	-0.157769
NC	LR02082418	LR02082418C19	HAW	1.58876
NC	LR02082418	LR02082418C20	HAW	0.96101
NC	LR02082418	LR02082418C21	HAW	1.24961
NC	LR02082418	LR02082418C22	HAW	-0.298268
NC	LR02082418	LR02082418C23	HAW	0.853097
NC	LR02082418	LR02082418C24	HAW	0.56608
NC	LR02082418	LR02082418C25	HAW	0.824702
NC	LR02082418	LR02082418C26	HAW	0.541137
NC	LR02082418	LR02082418C27	HAW	0.708377
NC	LR02082418	LR02082418C28	HAW	0.59821
NC	LR02082418	LR02082418C29	HAW	0.826718
NC	LR02082418	LR02082418C30	HAW	0.859668
NC	LR02082418	LR02082418C31	HAW	0.563901
NC	LR02082418	LR02082418C32	HAW	1.06881
NC	LR02082418	LR02082418C33	HAW	1.10672
NC	LR02082418	LR02082418C34	HAW	1.48657
NC	LR02082418	LR02082418C35	HAW	1.11865
NC	LR02082418	LR02082418C36	HAW	0.84645
NC	LR02082418	LR02082418C37	HAW	0.774847
NC	LR02082418	LR02082418C38	HAW	0.855389
NC	LR02082418	LR02082418C39	HAW	0.866475
NC	LR02082418	LR02082418C40	HAW	0.857151
NC	LR02082418	LR02082418C41	HAW	0.823278
NC	LR02082418	LR02082418C42	HAW	0.52242
NC	LR02082418	LR02082418C43	HAW	0.775583
NC	LR02082418	LR02082418C44	HAW	0.862591
NC	LR02082418	LR02082418C01	NREMS	-0.00965255
NC	LR02082418	LR02082418C02	NREMS	-0.0606554
NC	LR02082418	LR02082418C03	NREMS	-0.206957
NC	LR02082418	LR02082418C04	NREMS	-0.0901894
NC	LR02082418	LR02082418C05	NREMS	-0.112971
NC	LR02082418	LR02082418C06	NREMS	-0.0647386
NC	LR02082418	LR02082418C07	NREMS	-0.363965
NC	LR02082418	LR02082418C08	NREMS	0.187488
NC	LR02082418	LR02082418C09	NREMS	0.0249288
NC	LR02082418	LR02082418C10	NREMS	-0.262535
NC	LR02082418	LR02082418C11	NREMS	-0.204569
NC	LR02082418	LR02082418C12	NREMS	-0.527623
NC	LR02082418	LR02082418C13	NREMS	-0.347158
NC	LR02082418	LR02082418C14	NREMS	-0.295593
NC	LR02082418	LR02082418C15	NREMS	-0.141301
NC	LR02082418	LR02082418C16	NREMS	-0.0520144
NC	LR02082418	LR02082418C17	NREMS	-0.194307
NC	LR02082418	LR02082418C18	NREMS	-0.237199
NC	LR02082418	LR02082418C19	NREMS	-0.360481
NC	LR02082418	LR02082418C20	NREMS	-0.50432
NC	LR02082418	LR02082418C21	NREMS	-0.652185
NC	LR02082418	LR02082418C22	NREMS	0.672918
NC	LR02082418	LR02082418C23	NREMS	-0.64166
NC	LR02082418	LR02082418C24	NREMS	-0.472467
NC	LR02082418	LR02082418C25	NREMS	-0.145236
NC	LR02082418	LR02082418C26	NREMS	-0.186901
NC	LR02082418	LR02082418C27	NREMS	-0.282315
NC	LR02082418	LR02082418C28	NREMS	0.856741
NC	LR02082418	LR02082418C29	NREMS	-0.264065
NC	LR02082418	LR02082418C30	NREMS	-0.259602
NC	LR02082418	LR02082418C31	NREMS	0.0452773
NC	LR02082418	LR02082418C32	NREMS	-0.450747
NC	LR02082418	LR02082418C33	NREMS	-0.38664
NC	LR02082418	LR02082418C34	NREMS	-0.459095
NC	LR02082418	LR02082418C35	NREMS	-0.526585
NC	LR02082418	LR02082418C36	NREMS	0.223779
NC	LR02082418	LR02082418C37	NREMS	-0.615178
NC	LR02082418	LR02082418C38	NREMS	-0.5587
NC	LR02082418	LR02082418C39	NREMS	-0.830362
NC	LR02082418	LR02082418C40	NREMS	-0.43752
NC	LR02082418	LR02082418C41	NREMS	-0.752296
NC	LR02082418	LR02082418C42	NREMS	-0.567155
NC	LR02082418	LR02082418C43	NREMS	-0.401043
NC	LR02082418	LR02082418C44	NREMS	-0.187391
NC	LR02082418	LR02082418C01	QW	-0.0808261
NC	LR02082418	LR02082418C02	QW	-0.126574
NC	LR02082418	LR02082418C03	QW	-0.389603
NC	LR02082418	LR02082418C04	QW	-0.159374
NC	LR02082418	LR02082418C05	QW	-0.0854307
NC	LR02082418	LR02082418C06	QW	-0.0403988
NC	LR02082418	LR02082418C07	QW	-0.247267
NC	LR02082418	LR02082418C08	QW	-0.163306
NC	LR02082418	LR02082418C09	QW	0.108631
NC	LR02082418	LR02082418C10	QW	-0.251501
NC	LR02082418	LR02082418C11	QW	-0.0921667
NC	LR02082418	LR02082418C12	QW	-0.778898
NC	LR02082418	LR02082418C13	QW	-0.291949
NC	LR02082418	LR02082418C14	QW	-0.163606
NC	LR02082418	LR02082418C15	QW	-0.0722375
NC	LR02082418	LR02082418C16	QW	0.0307025
NC	LR02082418	LR02082418C17	QW	-0.373796
NC	LR02082418	LR02082418C18	QW	-0.145913
NC	LR02082418	LR02082418C19	QW	-0.38468
NC	LR02082418	LR02082418C20	QW	-0.699059
NC	LR02082418	LR02082418C21	QW	-0.415456
NC	LR02082418	LR02082418C22	QW	-0.26582
NC	LR02082418	LR02082418C23	QW	-0.765587
NC	LR02082418	LR02082418C24	QW	-0.35928
NC	LR02082418	LR02082418C25	QW	-0.0965024
NC	LR02082418	LR02082418C26	QW	-0.42797
NC	LR02082418	LR02082418C27	QW	-0.444908
NC	LR02082418	LR02082418C28	QW	-0.703721
NC	LR02082418	LR02082418C29	QW	-0.750157
NC	LR02082418	LR02082418C30	QW	-0.128163
NC	LR02082418	LR02082418C31	QW	-0.686864
NC	LR02082418	LR02082418C32	QW	-0.345943
NC	LR02082418	LR02082418C33	QW	-0.343443
NC	LR02082418	LR02082418C34	QW	-0.663625
NC	LR02082418	LR02082418C35	QW	-0.0617788
NC	LR02082418	LR02082418C36	QW	-0.248576
NC	LR02082418	LR02082418C37	QW	-0.587858
NC	LR02082418	LR02082418C38	QW	-0.768097
NC	LR02082418	LR02082418C39	QW	-1.02797
NC	LR02082418	LR02082418C40	QW	-0.636749
NC	LR02082418	LR02082418C41	QW	-0.944735
NC	LR02082418	LR02082418C42	QW	-0.542339
NC	LR02082418	LR02082418C43	QW	-0.367433
NC	LR02082418	LR02082418C44	QW	0.498415
NC	LR02082418	LR02082418C01	REMS	2.21996
NC	LR02082418	LR02082418C02	REMS	1.74904
NC	LR02082418	LR02082418C03	REMS	-0.0816063
NC	LR02082418	LR02082418C04	REMS	-0.106472
NC	LR02082418	LR02082418C05	REMS	-0.33395
NC	LR02082418	LR02082418C06	REMS	-0.0556853
NC	LR02082418	LR02082418C07	REMS	0.0419356
NC	LR02082418	LR02082418C08	REMS	-0.0993584
NC	LR02082418	LR02082418C09	REMS	2.45454
NC	LR02082418	LR02082418C10	REMS	-0.338952
NC	LR02082418	LR02082418C11	REMS	0.102951
NC	LR02082418	LR02082418C12	REMS	0.78782
NC	LR02082418	LR02082418C13	REMS	-0.0092889
NC	LR02082418	LR02082418C14	REMS	-0.159826
NC	LR02082418	LR02082418C15	REMS	1.37761
NC	LR02082418	LR02082418C16	REMS	-0.0220897
NC	LR02082418	LR02082418C17	REMS	-0.238185
NC	LR02082418	LR02082418C18	REMS	0.511675
NC	LR02082418	LR02082418C19	REMS	-0.371314
NC	LR02082418	LR02082418C20	REMS	-0.839421
NC	LR02082418	LR02082418C21	REMS	-0.739977
NC	LR02082418	LR02082418C22	REMS	1.40426
NC	LR02082418	LR02082418C23	REMS	0.0523788
NC	LR02082418	LR02082418C24	REMS	-0.294164
NC	LR02082418	LR02082418C25	REMS	-0.611626
NC	LR02082418	LR02082418C26	REMS	-0.458973
NC	LR02082418	LR02082418C27	REMS	0.160559
NC	LR02082418	LR02082418C28	REMS	-0.256031
NC	LR02082418	LR02082418C29	REMS	0.263112
NC	LR02082418	LR02082418C30	REMS	-0.144629
NC	LR02082418	LR02082418C31	REMS	0.437368
NC	LR02082418	LR02082418C32	REMS	-0.374249
NC	LR02082418	LR02082418C33	REMS	-0.155455
NC	LR02082418	LR02082418C34	REMS	0.410868
NC	LR02082418	LR02082418C35	REMS	-0.658971
NC	LR02082418	LR02082418C36	REMS	1.45872
NC	LR02082418	LR02082418C37	REMS	-0.367915
NC	LR02082418	LR02082418C38	REMS	-0.37905
NC	LR02082418	LR02082418C39	REMS	0.118229
NC	LR02082418	LR02082418C40	REMS	0.241549
NC	LR02082418	LR02082418C41	REMS	-0.281383
NC	LR02082418	LR02082418C42	REMS	-0.236085
NC	LR02082418	LR02082418C43	REMS	0.691184
NC	LR02082418	LR02082418C44	REMS	-0.247239
NC	LR02082418	LR02082418C01	SC	0.0264495
NC	LR02082418	LR02082418C02	SC	-0.1007
NC	LR02082418	LR02082418C03	SC	-0.0887631
NC	LR02082418	LR02082418C04	SC	-0.178824
NC	LR02082418	LR02082418C05	SC	0.0116681
NC	LR02082418	LR02082418C06	SC	0.210232
NC	LR02082418	LR02082418C07	SC	-0.389531
NC	LR02082418	LR02082418C08	SC	0.886254
NC	LR02082418	LR02082418C09	SC	-0.0673342
NC	LR02082418	LR02082418C10	SC	-0.336485
NC	LR02082418	LR02082418C11	SC	3.98016
NC	LR02082418	LR02082418C12	SC	-0.485371
NC	LR02082418	LR02082418C13	SC	-0.345213
NC	LR02082418	LR02082418C14	SC	0.726045
NC	LR02082418	LR02082418C15	SC	0.142106
NC	LR02082418	LR02082418C16	SC	-0.105218
NC	LR02082418	LR02082418C17	SC	0.178209
NC	LR02082418	LR02082418C18	SC	0.066837
NC	LR02082418	LR02082418C19	SC	-0.245993
NC	LR02082418	LR02082418C20	SC	-0.0197768
NC	LR02082418	LR02082418C21	SC	-0.153774
NC	LR02082418	LR02082418C22	SC	-0.0278115
NC	LR02082418	LR02082418C23	SC	-0.166216
NC	LR02082418	LR02082418C24	SC	0.0520954
NC	LR02082418	LR02082418C25	SC	0.592107
NC	LR02082418	LR02082418C26	SC	-0.0430452
NC	LR02082418	LR02082418C27	SC	-0.275813
NC	LR02082418	LR02082418C28	SC	1.55683
NC	LR02082418	LR02082418C29	SC	-0.285183
NC	LR02082418	LR02082418C30	SC	-0.106976
NC	LR02082418	LR02082418C31	SC	0.0650522
NC	LR02082418	LR02082418C32	SC	0.0243531
NC	LR02082418	LR02082418C33	SC	-0.43726
NC	LR02082418	LR02082418C34	SC	0.293454
NC	LR02082418	LR02082418C35	SC	0.225615
NC	LR02082418	LR02082418C36	SC	-0.522803
NC	LR02082418	LR02082418C37	SC	-0.657119
NC	LR02082418	LR02082418C38	SC	-0.128407
NC	LR02082418	LR02082418C39	SC	-0.418622
NC	LR02082418	LR02082418C40	SC	-0.428791
NC	LR02082418	LR02082418C41	SC	-0.746383
NC	LR02082418	LR02082418C42	SC	-0.69948
NC	LR02082418	LR02082418C43	SC	0.00347555
NC	LR02082418	LR02082418C44	SC	0.745553
NC	LR02082418	LR02082418C01	EC	-0.141196
NC	LR02082418	LR02082418C02	EC	-0.210613
NC	LR02082418	LR02082418C03	EC	0.129224
NC	LR02082418	LR02082418C04	EC	0.375056
NC	LR02082418	LR02082418C05	EC	1.02055
NC	LR02082418	LR02082418C06	EC	0.179016
NC	LR02082418	LR02082418C07	EC	1.54149
NC	LR02082418	LR02082418C08	EC	-0.668666
NC	LR02082418	LR02082418C09	EC	-0.275562
NC	LR02082418	LR02082418C10	EC	-0.051934
NC	LR02082418	LR02082418C11	EC	0.151534
NC	LR02082418	LR02082418C12	EC	0.683784
NC	LR02082418	LR02082418C13	EC	0.321527
NC	LR02082418	LR02082418C14	EC	0.369442
NC	LR02082418	LR02082418C15	EC	-0.427148
NC	LR02082418	LR02082418C16	EC	0.362096
NC	LR02082418	LR02082418C17	EC	-0.390896
NC	LR02082418	LR02082418C18	EC	2.20818
NC	LR02082418	LR02082418C19	EC	1.01542
NC	LR02082418	LR02082418C20	EC	-0.0752719
NC	LR02082418	LR02082418C21	EC	1.39427
NC	LR02082418	LR02082418C22	EC	-0.415302
NC	LR02082418	LR02082418C23	EC	1.35842
NC	LR02082418	LR02082418C24	EC	0.25197
NC	LR02082418	LR02082418C25	EC	-0.550074
NC	LR02082418	LR02082418C26	EC	1.39065
NC	LR02082418	LR02082418C27	EC	1.4455
NC	LR02082418	LR02082418C28	EC	0.0664062
NC	LR02082418	LR02082418C29	EC	2.23252
NC	LR02082418	LR02082418C30	EC	-0.246896
NC	LR02082418	LR02082418C31	EC	-0.0900981
NC	LR02082418	LR02082418C32	EC	0.380313
NC	LR02082418	LR02082418C33	EC	0.702404
NC	LR02082418	LR02082418C34	EC	0.854813
NC	LR02082418	LR02082418C35	EC	1.62553
NC	LR02082418	LR02082418C36	EC	0.544833
NC	LR02082418	LR02082418C37	EC	0.544718
NC	LR02082418	LR02082418C38	EC	0.898372
NC	LR02082418	LR02082418C39	EC	1.43405
NC	LR02082418	LR02082418C40	EC	0.712758
NC	LR02082418	LR02082418C41	EC	0.984549
NC	LR02082418	LR02082418C42	EC	0.490675
NC	LR02082418	LR02082418C43	EC	1.42337
NC	LR02082418	LR02082418C44	EC	0.621844
NC	LR03091618	LR03091618C01	AW	-0.0464999
NC	LR03091618	LR03091618C02	AW	-0.102851
NC	LR03091618	LR03091618C03	AW	-0.03684
NC	LR03091618	LR03091618C04	AW	-0.0121763
NC	LR03091618	LR03091618C05	AW	0.0703316
NC	LR03091618	LR03091618C06	AW	0.484237
NC	LR03091618	LR03091618C07	AW	0.211692
NC	LR03091618	LR03091618C08	AW	-0.175458
NC	LR03091618	LR03091618C09	AW	-0.00304575
NC	LR03091618	LR03091618C10	AW	0.273639
NC	LR03091618	LR03091618C11	AW	0.566031
NC	LR03091618	LR03091618C12	AW	0.743828
NC	LR03091618	LR03091618C13	AW	1.12904
NC	LR03091618	LR03091618C14	AW	0.41553
NC	LR03091618	LR03091618C15	AW	0.266444
NC	LR03091618	LR03091618C16	AW	0.406956
NC	LR03091618	LR03091618C17	AW	-0.241298
NC	LR03091618	LR03091618C18	AW	0.382954
NC	LR03091618	LR03091618C19	AW	0.147258
NC	LR03091618	LR03091618C20	AW	0.914391
NC	LR03091618	LR03091618C21	AW	0.415228
NC	LR03091618	LR03091618C22	AW	-0.872814
NC	LR03091618	LR03091618C23	AW	0.485734
NC	LR03091618	LR03091618C24	AW	1.29179
NC	LR03091618	LR03091618C25	AW	1.23105
NC	LR03091618	LR03091618C26	AW	0.474902
NC	LR03091618	LR03091618C27	AW	0.378769
NC	LR03091618	LR03091618C28	AW	-0.283628
NC	LR03091618	LR03091618C29	AW	-0.139933
NC	LR03091618	LR03091618C30	AW	1.53651
NC	LR03091618	LR03091618C31	AW	0.0979775
NC	LR03091618	LR03091618C32	AW	1.30739
NC	LR03091618	LR03091618C33	AW	0.781521
NC	LR03091618	LR03091618C34	AW	0.546769
NC	LR03091618	LR03091618C35	AW	0.457137
NC	LR03091618	LR03091618C36	AW	-0.0961219
NC	LR03091618	LR03091618C37	AW	0.523303
NC	LR03091618	LR03091618C38	AW	-0.235278
NC	LR03091618	LR03091618C39	AW	1.05919
NC	LR03091618	LR03091618C40	AW	1.19159
NC	LR03091618	LR03091618C41	AW	0.285737
NC	LR03091618	LR03091618C42	AW	0.0446559
NC	LR03091618	LR03091618C01	HAW	0.0924068
NC	LR03091618	LR03091618C02	HAW	-0.217043
NC	LR03091618	LR03091618C03	HAW	0.134019
NC	LR03091618	LR03091618C04	HAW	1.26417
NC	LR03091618	LR03091618C05	HAW	0.945948
NC	LR03091618	LR03091618C06	HAW	1.40755
NC	LR03091618	LR03091618C07	HAW	0.709897
NC	LR03091618	LR03091618C08	HAW	-0.222461
NC	LR03091618	LR03091618C09	HAW	-0.204543
NC	LR03091618	LR03091618C10	HAW	1.27652
NC	LR03091618	LR03091618C11	HAW	1.02398
NC	LR03091618	LR03091618C12	HAW	0.310128
NC	LR03091618	LR03091618C13	HAW	0.601019
NC	LR03091618	LR03091618C14	HAW	1.35258
NC	LR03091618	LR03091618C15	HAW	-0.45489
NC	LR03091618	LR03091618C16	HAW	1.14814
NC	LR03091618	LR03091618C17	HAW	-0.289709
NC	LR03091618	LR03091618C18	HAW	-0.157769
NC	LR03091618	LR03091618C19	HAW	1.58876
NC	LR03091618	LR03091618C20	HAW	0.96101
NC	LR03091618	LR03091618C21	HAW	1.24961
NC	LR03091618	LR03091618C22	HAW	-0.298268
NC	LR03091618	LR03091618C23	HAW	0.853097
NC	LR03091618	LR03091618C24	HAW	0.56608
NC	LR03091618	LR03091618C25	HAW	0.824702
NC	LR03091618	LR03091618C26	HAW	0.541137
NC	LR03091618	LR03091618C27	HAW	1.70838
NC	LR03091618	LR03091618C28	HAW	0.59821
NC	LR03091618	LR03091618C29	HAW	0.826718
NC	LR03091618	LR03091618C30	HAW	0.859668
NC	LR03091618	LR03091618C31	HAW	0.563901
NC	LR03091618	LR03091618C32	HAW	1.06881
NC	LR03091618	LR03091618C33	HAW	1.10672
NC	LR03091618	LR03091618C34	HAW	1.48657
NC	LR03091618	LR03091618C35	HAW	1.11865
NC	LR03091618	LR03091618C36	HAW	0.84645
NC	LR03091618	LR03091618C37	HAW	0.774847
NC	LR03091618	LR03091618C38	HAW	0.855389
NC	LR03091618	LR03091618C39	HAW	0.866475
NC	LR03091618	LR03091618C40	HAW	0.857151
NC	LR03091618	LR03091618C41	HAW	0.823278
NC	LR03091618	LR03091618C42	HAW	0.52242
NC	LR03091618	LR03091618C01	NREMS	-0.0426095
NC	LR03091618	LR03091618C02	NREMS	-0.0660605
NC	LR03091618	LR03091618C03	NREMS	-0.285396
NC	LR03091618	LR03091618C04	NREMS	-0.0665336
NC	LR03091618	LR03091618C05	NREMS	-0.110636
NC	LR03091618	LR03091618C06	NREMS	-0.132269
NC	LR03091618	LR03091618C07	NREMS	-0.361658
NC	LR03091618	LR03091618C08	NREMS	0.167667
NC	LR03091618	LR03091618C09	NREMS	-0.0129021
NC	LR03091618	LR03091618C10	NREMS	-0.264436
NC	LR03091618	LR03091618C11	NREMS	-0.239508
NC	LR03091618	LR03091618C12	NREMS	-0.278054
NC	LR03091618	LR03091618C13	NREMS	-0.352193
NC	LR03091618	LR03091618C14	NREMS	-0.342514
NC	LR03091618	LR03091618C15	NREMS	-0.204432
NC	LR03091618	LR03091618C16	NREMS	-0.169205
NC	LR03091618	LR03091618C17	NREMS	-0.163557
NC	LR03091618	LR03091618C18	NREMS	-0.114907
NC	LR03091618	LR03091618C19	NREMS	-0.370344
NC	LR03091618	LR03091618C20	NREMS	-0.408634
NC	LR03091618	LR03091618C21	NREMS	-0.3579
NC	LR03091618	LR03091618C22	NREMS	0.784814
NC	LR03091618	LR03091618C23	NREMS	-0.636535
NC	LR03091618	LR03091618C24	NREMS	-0.422136
NC	LR03091618	LR03091618C25	NREMS	-0.19438
NC	LR03091618	LR03091618C26	NREMS	-0.224481
NC	LR03091618	LR03091618C27	NREMS	-0.301355
NC	LR03091618	LR03091618C28	NREMS	-0.277746
NC	LR03091618	LR03091618C29	NREMS	-0.547973
NC	LR03091618	LR03091618C30	NREMS	-0.330583
NC	LR03091618	LR03091618C31	NREMS	-0.000914763
NC	LR03091618	LR03091618C32	NREMS	-0.460905
NC	LR03091618	LR03091618C33	NREMS	-0.350968
NC	LR03091618	LR03091618C34	NREMS	-0.545796
NC	LR03091618	LR03091618C35	NREMS	-0.581449
NC	LR03091618	LR03091618C36	NREMS	0.25411
NC	LR03091618	LR03091618C37	NREMS	-0.61356
NC	LR03091618	LR03091618C38	NREMS	-0.582474
NC	LR03091618	LR03091618C39	NREMS	-0.453744
NC	LR03091618	LR03091618C40	NREMS	-0.448659
NC	LR03091618	LR03091618C41	NREMS	-0.355265
NC	LR03091618	LR03091618C42	NREMS	0.869997
NC	LR03091618	LR03091618C01	QW	-0.0808261
NC	LR03091618	LR03091618C02	QW	-0.126574
NC	LR03091618	LR03091618C03	QW	-0.389603
NC	LR03091618	LR03091618C04	QW	-0.159374
NC	LR03091618	LR03091618C05	QW	-0.0854307
NC	LR03091618	LR03091618C06	QW	-0.0403988
NC	LR03091618	LR03091618C07	QW	-0.247267
NC	LR03091618	LR03091618C08	QW	-0.163306
NC	LR03091618	LR03091618C09	QW	0.108631
NC	LR03091618	LR03091618C10	QW	-0.251501
NC	LR03091618	LR03091618C11	QW	-0.0921667
NC	LR03091618	LR03091618C12	QW	-0.278898
NC	LR03091618	LR03091618C13	QW	-0.291949
NC	LR03091618	LR03091618C14	QW	-0.163606
NC	LR03091618	LR03091618C15	QW	-0.0722375
NC	LR03091618	LR03091618C16	QW	0.0307025
NC	LR03091618	LR03091618C17	QW	-0.373796
NC	LR03091618	LR03091618C18	QW	-0.145913
NC	LR03091618	LR03091618C19	QW	-0.38468
NC	LR03091618	LR03091618C20	QW	-0.699059
NC	LR03091618	LR03091618C21	QW	-0.415456
NC	LR03091618	LR03091618C22	QW	-0.36582
NC	LR03091618	LR03091618C23	QW	-0.765587
NC	LR03091618	LR03091618C24	QW	-0.35928
NC	LR03091618	LR03091618C25	QW	-0.0965024
NC	LR03091618	LR03091618C26	QW	-0.42797
NC	LR03091618	LR03091618C27	QW	-0.444908
NC	LR03091618	LR03091618C28	QW	-0.303721
NC	LR03091618	LR03091618C29	QW	-0.750157
NC	LR03091618	LR03091618C30	QW	-0.128163
NC	LR03091618	LR03091618C31	QW	-0.186864
NC	LR03091618	LR03091618C32	QW	-0.345943
NC	LR03091618	LR03091618C33	QW	-0.343443
NC	LR03091618	LR03091618C34	QW	0.0636253
NC	LR03091618	LR03091618C35	QW	-0.0617788
NC	LR03091618	LR03091618C36	QW	-0.248576
NC	LR03091618	LR03091618C37	QW	-0.487858
NC	LR03091618	LR03091618C38	QW	-0.768097
NC	LR03091618	LR03091618C39	QW	-0.327971
NC	LR03091618	LR03091618C40	QW	-0.636749
NC	LR03091618	LR03091618C41	QW	-0.444735
NC	LR03091618	LR03091618C42	QW	-0.242339
NC	LR03091618	LR03091618C01	REMS	2.21996
NC	LR03091618	LR03091618C02	REMS	1.74904
NC	LR03091618	LR03091618C03	REMS	-0.0816063
NC	LR03091618	LR03091618C04	REMS	-0.106472
NC	LR03091618	LR03091618C05	REMS	-0.0339497
NC	LR03091618	LR03091618C06	REMS	-0.0556853
NC	LR03091618	LR03091618C07	REMS	0.0419356
NC	LR03091618	LR03091618C08	REMS	-0.0993584
NC	LR03091618	LR03091618C09	REMS	2.45454
NC	LR03091618	LR03091618C10	REMS	-0.338952
NC	LR03091618	LR03091618C11	REMS	0.102951
NC	LR03091618	LR03091618C12	REMS	1.78782
NC	LR03091618	LR03091618C13	REMS	0.429289
NC	LR03091618	LR03091618C14	REMS	0.759826
NC	LR03091618	LR03091618C15	REMS	2.37761
NC	LR03091618	LR03091618C16	REMS	-0.0220897
NC	LR03091618	LR03091618C17	REMS	-0.238185
NC	LR03091618	LR03091618C18	REMS	0.511675
NC	LR03091618	LR03091618C19	REMS	-0.371314
NC	LR03091618	LR03091618C20	REMS	-0.839421
NC	LR03091618	LR03091618C21	REMS	-0.739977
NC	LR03091618	LR03091618C22	REMS	0.100426
NC	LR03091618	LR03091618C23	REMS	0.0523788
NC	LR03091618	LR03091618C24	REMS	-0.294164
NC	LR03091618	LR03091618C25	REMS	-0.111626
NC	LR03091618	LR03091618C26	REMS	-0.458973
NC	LR03091618	LR03091618C27	REMS	2.25979
NC	LR03091618	LR03091618C28	REMS	0.456031
NC	LR03091618	LR03091618C29	REMS	0.134961
NC	LR03091618	LR03091618C30	REMS	-0.144629
NC	LR03091618	LR03091618C31	REMS	0.637368
NC	LR03091618	LR03091618C32	REMS	-0.374249
NC	LR03091618	LR03091618C33	REMS	-0.155455
NC	LR03091618	LR03091618C34	REMS	0.794947
NC	LR03091618	LR03091618C35	REMS	-0.658971
NC	LR03091618	LR03091618C36	REMS	1.45872
NC	LR03091618	LR03091618C37	REMS	-0.367915
NC	LR03091618	LR03091618C38	REMS	-0.17905
NC	LR03091618	LR03091618C39	REMS	0.418229
NC	LR03091618	LR03091618C40	REMS	0.241549
NC	LR03091618	LR03091618C41	REMS	0.281383
NC	LR03091618	LR03091618C42	REMS	0.536085
NC	LR03091618	LR03091618C01	SC	0.0264495
NC	LR03091618	LR03091618C02	SC	-0.1007
NC	LR03091618	LR03091618C03	SC	-0.0887631
NC	LR03091618	LR03091618C04	SC	-0.178824
NC	LR03091618	LR03091618C05	SC	0.0116681
NC	LR03091618	LR03091618C06	SC	0.210232
NC	LR03091618	LR03091618C07	SC	-0.389531
NC	LR03091618	LR03091618C08	SC	0.886254
NC	LR03091618	LR03091618C09	SC	-0.0673342
NC	LR03091618	LR03091618C10	SC	-0.336485
NC	LR03091618	LR03091618C11	SC	2.38016
NC	LR03091618	LR03091618C12	SC	-0.485371
[truncated: 338 more rows]

## Sheet: 2B
Time	C1	C2	C3	C4	C5	C6	C7	C8	C9	C10	C11	C12	C13	C14	C15	C16	C17	C18	C19	C20	C21	C22	C23	C24	C25	C26	C27	C28	C29	C30	C31	C32	C33	C34	C35	C36	C37	C38	C39	C40	C41	C42	C43	C44
0	0.0943764	-0.159893	-0.474133	-0.184552	-0.185254	-0.0910527	-0.43875	-0.0978633	0.2127	-0.255793	-0.459257	-0.428222	-0.311536	-0.295028	1.15614	0.1924	-0.249598	-0.167117	-0.398812	-0.619727	-0.470771	0.1413	-0.892724	-0.674624	0.219363	0.23007	-0.468476	-0.270007	-0.452073	-0.175291	-0.121411	-0.598069	-0.28084	-0.260058	-0.174876	0.202912	-0.56958	-0.645726	-0.842558	-0.394439	-1.00925	-0.568203	-0.23255	0.385169
0.1	-0.0138655	-0.18224	-0.243256	-0.0508673	-0.455078	0.162107	-0.619216	-0.0835218	0.0344551	-0.31336	-0.472571	-0.552397	-0.321627	-0.23632	0.801961	0.281281	-0.149419	-0.0496525	-0.497451	-0.70929	-0.479481	0.654715	-0.694931	-0.417953	0.297631	0.0857422	-0.263225	0.0683178	-0.644778	-0.169178	-0.777342	-0.518533	-0.59956	-0.484407	-0.120761	0.15564	-0.703928	-0.763098	-0.885855	-0.372005	-0.799514	-0.759186	-0.383572	0.508164
0.2	-0.0412668	-0.156676	-0.289125	-0.111295	-0.0942022	0.111873	-0.619158	-0.262798	0.104661	-0.393111	-0.551526	-0.408418	-0.320867	-0.322048	1.3215	0.0223739	-0.249463	0.394169	-0.480588	-0.421302	-0.510404	0.626721	-0.679877	-0.573586	0.18326	-0.00661682	-0.25648	0.0641429	-0.720529	-0.0942342	-0.774053	-0.226179	-0.426803	-0.466905	-0.385078	0.262322	-0.745803	-0.676221	-1.13289	-0.333648	-0.830561	-0.85166	0.0818047	0.426139
0.3	0.100727	-0.0879709	-0.224697	-0.118726	-0.357276	9.80089e-05	0.0422073	-0.0290352	0.279818	-0.208774	-0.466098	-0.758671	-0.321093	-0.273999	2.81216	0.380189	-0.210538	0.610085	-0.515458	-0.339946	-0.661974	0.719563	-1.05037	-0.60744	0.431506	-0.135245	0.106278	-0.054616	-0.264695	-0.0601067	-0.693766	-0.404248	-0.533223	-0.372207	-0.395071	0.0456812	-0.617238	-0.666999	-0.610855	-0.409672	-0.697564	-0.82749	-0.233238	0.57879
0.4	-0.0651621	-0.0974118	-0.381408	-0.212824	-0.196414	-0.412009	-0.136117	0.157387	0.18587	-0.323887	-0.671345	-0.659852	-0.297651	-0.322408	3.84881	0.312804	-0.316689	0.569413	-0.510773	-0.353094	-0.519504	0.568306	-0.708039	-0.551441	0.193626	-0.197008	0.353515	0.0566052	-0.428038	-0.263012	-0.5592	-0.290249	-0.195838	-0.263864	-0.395266	0.552285	-0.956327	-0.743063	-0.76126	-0.403969	-1.12157	-0.662932	-0.77487	0.336072
0.5	0.0193467	-0.167877	-0.308847	-0.218668	-0.251031	0.0287337	-0.0267792	0.226234	0.475274	-0.394516	-0.534378	-0.046731	-0.300613	-0.297814	3.84493	0.236285	-0.209181	0.524053	-0.555895	-0.51101	-0.562317	0.699544	-0.66431	-0.59537	0.47229	-0.690526	0.247942	-0.134225	-0.285709	-0.235405	-0.499813	-0.455893	-0.474959	-0.299789	-0.368975	0.657765	-0.730277	-0.681639	-0.848489	-0.478882	-0.701109	-0.562994	0.00403885	0.69497
0.6	0.157539	-0.0559936	-0.415395	-0.150494	-0.261713	0.11563	-0.611659	-0.132068	0.415131	-0.396392	-0.714287	-0.366189	-0.328666	-0.292127	3.76108	-0.0283684	-0.327968	0.877228	-0.535202	-0.690545	-0.490278	0.928665	-0.864815	-0.7186	0.477803	-0.511254	0.41045	-0.244411	-0.319266	-0.0483087	-0.691132	-0.439832	-0.328256	-0.39437	-0.354442	1.06628	-0.808226	-0.759019	-0.762636	-0.430669	-0.694331	-0.459445	-0.0514036	0.498705
0.7	0.202455	-0.165184	-0.343833	-0.185494	-0.30149	-0.0192472	-0.259406	-0.0392228	0.488747	-0.237392	-0.415956	-0.430375	-0.346311	-0.307501	3.71214	0.334546	-0.10759	0.976554	-0.648574	-0.577255	-0.512017	0.916263	-0.859856	-0.477355	0.26771	-0.537462	0.225717	-0.00151738	-0.700724	-0.389901	-0.764278	-0.302734	-0.326993	-0.0671913	-0.355737	0.823807	-0.779143	-0.746061	-0.704072	-0.454399	-0.790653	-0.610935	0.0416845	0.493135
0.8	0.19076	-0.100617	-0.280055	-0.196342	-0.332079	0.00354761	-0.270322	-0.131041	0.39168	-0.341747	-0.181614	-0.384892	-0.309799	-0.276516	3.35335	0.00384579	-0.239505	0.565711	-0.42947	-0.667952	-0.4777	0.72098	-0.589015	-0.560446	0.346213	-0.399982	0.160789	-0.240152	-0.0674035	-0.367187	-0.545381	-0.575355	-0.206979	-0.407801	-0.292364	1.22515	-0.973792	-0.655315	-0.773125	-0.354146	-0.695283	-0.526671	0.218783	0.67044
0.9	0.0892395	-0.0889285	-0.218926	-0.171484	-0.294944	0.195713	-0.069706	0.181277	0.239577	-0.391604	-0.344393	-0.628478	-0.340038	-0.273059	3.05927	0.15827	-0.125603	0.811865	-0.644466	-0.635781	-0.406024	0.937045	-0.653864	-0.637695	0.318018	-0.604706	0.354642	-0.283335	-0.546023	-0.158134	-0.887562	-0.461107	-0.266154	-0.319354	-0.153402	1.11447	-1.04746	-0.863805	-0.583371	-0.511372	-0.641232	-0.617644	-0.391884	0.823271
1	0.161903	-0.180282	-0.388351	-0.168822	-0.18412	0.132414	-0.344261	0.536802	0.0704746	-0.312549	-0.260677	-0.64748	-0.344887	-0.181731	2.86856	0.074345	-0.224686	0.409136	-0.502684	-0.455427	-0.328794	0.842065	-0.770791	-0.592633	0.100272	-0.331799	0.303491	0.955554	-0.518691	-0.100095	-0.524943	-0.430844	-0.369781	-0.299524	-0.166113	0.927142	-0.857483	-0.637696	-0.694775	-0.495718	-0.653541	-0.680929	-0.414655	0.488164
1.1	0.158336	-0.178004	-0.41577	-0.146696	-0.518042	0.0583736	-0.504627	0.137535	-0.0649783	-0.389599	-0.20516	-0.324615	-0.282577	-0.112033	2.69519	0.169951	-0.365235	0.441536	-0.487181	-0.635733	-0.191051	0.355346	-0.738649	-0.618169	0.20765	-0.382345	0.0819832	3.27449	-0.496663	0.210942	-0.749909	-0.375005	-0.396117	-0.328642	-0.0231244	1.02368	-0.722492	-0.729013	-0.644214	-0.31565	-0.808689	-0.741947	-0.193767	0.88745
1.2	-0.0210105	-0.0414826	-0.310024	-0.254729	-0.356761	-0.160013	0.352923	0.346132	0.0346946	-0.431878	-0.488626	-0.272582	-0.314299	-0.0911371	2.65012	-0.256186	-0.0955412	0.456773	-0.522196	-0.348264	-0.104122	0.48159	-0.954678	-0.727293	-0.0471852	-0.45685	0.0557855	4.37544	-0.370894	-0.0424353	-0.446789	-0.242525	-0.524428	-0.493426	0.0877134	0.690081	-0.764451	-0.675734	-1.13373	-0.372758	-0.908261	-0.396546	-0.121158	0.483392
1.3	0.0254307	-0.0402593	-0.367685	-0.316975	-0.407128	-0.0299488	-0.267553	-0.120404	0.0872798	-0.557372	-0.181856	-0.641929	-0.248364	-0.154334	2.58784	-0.127132	-0.236796	0.0241201	-0.485546	-0.331923	-0.0290093	0.378279	-0.724483	-0.768788	0.148375	-0.423936	0.190817	4.40648	-0.156643	0.154487	-0.759224	-0.572035	-0.405939	-0.142438	0.204712	0.643031	-0.648903	-0.619971	-0.574181	-0.465261	-0.829063	-0.672183	-0.48163	0.661748
1.4	0.022332	-0.0855124	-0.339581	-0.111375	-0.468275	-0.177974	-0.223527	-0.0117898	0.0474127	-0.488867	-0.259632	-0.480826	-0.306288	-0.19446	2.31917	-0.0299303	-0.227164	0.175673	-0.604654	-0.468182	-0.202777	0.626609	-0.764174	-0.677195	0.0683668	-0.380506	0.24962	4.72104	-0.410476	0.203317	-0.710229	-0.361141	-0.392657	-0.452207	0.219447	0.830045	-0.688515	-0.788762	-0.722955	-0.494608	-0.935949	-0.393178	-0.440578	0.785534
1.5	-0.097483	-0.115091	-0.304276	-0.184796	-0.184524	0.245742	-0.440288	0.0990076	0.120714	-0.309333	-0.0618332	-0.363837	-0.335181	-0.112317	1.98801	-0.408711	-0.246812	0.202321	-0.643991	-0.624696	-0.286712	0.819105	-0.787192	-0.777635	0.137031	-0.190807	0.295201	4.5211	-0.427132	-0.115768	-0.586963	-0.638895	-0.256894	-0.348731	0.0698795	0.845931	-0.785548	-0.85516	-0.757731	-0.465404	-0.392121	-0.526259	-0.40096	0.633195
1.6	0.044433	-0.0681079	-0.319389	-0.207429	-0.453837	-0.0703304	-0.0351727	0.0604606	-0.135826	-0.33468	-0.0933022	-0.0962174	-0.300586	-0.190325	1.82241	-0.392476	-0.238917	-0.107975	-0.569504	-0.405535	-0.286095	0.767703	-0.577489	-0.530287	-0.0374254	-0.0595034	0.27221	3.94065	-0.724412	0.222026	-0.683371	-0.259643	-0.44173	-0.2758	0.0327744	0.695806	-0.841365	-0.781494	-0.729058	-0.387908	-0.850551	-0.647716	-0.0381748	0.368938
1.7	-0.00726651	-0.148678	-0.414351	-0.282026	-0.323331	0.0589522	-0.306044	0.185975	-0.237836	-0.507789	0.0487059	-0.705565	-0.319742	-0.13267	1.6352	-0.0590763	-0.281475	0.273681	-0.422035	-0.447399	-0.246682	0.978462	-0.604608	-0.673222	0.0157	-0.532003	0.221285	3.75419	-0.886491	-0.0534786	-0.828142	-0.479776	-0.502547	-0.306619	0.0835232	0.620234	-0.957676	-0.751966	-0.776883	-0.468399	-0.782425	-0.839848	-0.432877	0.553492
1.8	0.0988081	-0.245742	-0.380944	-0.233468	-0.341787	-0.133833	-0.399163	-0.0924854	-0.349951	-0.219229	-0.394829	-0.470344	-0.302471	-0.0917613	1.27931	-0.0287061	-0.333264	0.0544434	-0.521764	-0.357596	-0.282908	1.18261	-1.00542	-0.566914	0.173662	-0.0183272	0.166115	3.86403	-0.546657	0.000349543	-0.551853	-0.487661	-0.607412	-0.510513	0.019368	0.616122	-0.798273	-0.683989	-0.581054	-0.435876	-1.10134	-0.640026	-0.471497	0.366193
1.9	-0.00232103	-0.199408	-0.242493	-0.194242	-0.0307258	0.0898313	-0.43268	0.481004	-0.176655	-0.449917	0.144077	-0.560915	-0.31833	-0.192504	1.00069	-0.399638	-0.217286	0.0855952	-0.58076	-0.688203	-0.249197	0.822095	-0.848214	-0.596832	0.339851	-0.280744	0.0059469	4.13177	-0.568208	0.0680984	-0.896944	-0.367107	-0.689347	-0.46064	0.0377326	0.236852	-0.861644	-0.772296	-0.866344	-0.54924	-1.05037	-0.976475	-0.792069	0.20828
2	0.0625107	-0.148268	-0.412911	-0.193901	-0.295038	0.00359073	-0.178004	0.0596105	-0.15281	-0.32841	-0.394644	-0.579087	-0.333951	-0.126534	0.780149	-0.183899	-0.202296	-0.050413	-0.575594	-0.812851	-0.263735	0.710593	-0.74948	-0.746088	-0.158489	-0.1646	-0.0752282	3.44565	-0.674767	0.196169	-0.837794	-0.662154	-0.639649	-0.510266	0.0933966	0.105841	-0.869415	-0.787296	-0.802062	-0.466648	-0.72985	-0.801149	-0.355509	0.28644
2.1	-0.0347188	-0.144898	-0.370558	-0.175902	-0.230619	0.080553	0.197516	0.0417492	-0.14221	-0.368943	-0.233215	-0.498458	-0.299338	-0.271114	0.819608	-0.231255	-0.283035	0.59273	-0.590031	-0.504839	-0.408393	0.889032	-0.525634	-0.73322	-0.0613563	-0.247021	-0.0735175	3.56133	-0.396556	-0.308236	-0.791338	-0.34392	-0.55051	-0.431614	-0.125152	0.284861	-0.739335	-0.814048	-0.876555	-0.36038	-0.945411	-0.816879	-0.581029	0.321723
2.2	0.133702	-0.184084	-0.289778	-0.129715	-0.329013	-0.0134456	-0.241996	-0.0462546	-0.1596	-0.438581	-0.314748	-0.609252	-0.261683	-0.238428	0.638599	-0.0804226	-0.326319	-0.370422	-0.537074	-0.686416	-0.428107	1.04267	-0.822023	-0.496372	-0.0353665	-0.308843	-0.21571	2.8391	-0.342331	0.160542	-0.293411	-0.378383	-0.615028	-0.436375	0.026117	0.577278	-0.907543	-0.726356	-0.644285	-0.388081	-1.10261	-0.945908	-0.314295	0.328185
2.3	0.0292642	-0.160663	-0.348989	-0.0456565	-0.441667	0.0722935	-0.563927	0.189776	-0.173558	-0.412125	-0.404781	-0.267084	-0.284541	-0.27891	0.379342	-0.093622	-0.187335	0.093676	-0.457391	-0.54806	-0.365988	1.20562	-0.617138	-0.791955	0.162989	-0.481331	-0.161401	2.64173	-0.587415	-0.287117	-0.331305	-0.420101	-0.572192	-0.48752	-0.0436974	0.515494	-0.892254	-0.830242	-0.721021	-0.477447	-0.690399	-0.812407	-0.646592	0.387684
2.4	-0.0278887	-0.0972393	-0.362906	-0.141198	-0.370939	0.0174832	-0.218074	-0.0748373	-0.289917	-0.226457	-0.445766	-0.293785	-0.316905	-0.317703	0.49326	-0.14077	-0.291434	0.0845391	-0.365696	-0.625109	-0.509439	1.01883	-0.671036	-0.536895	0.216119	0.00514114	-0.221274	2.89051	-0.528594	-0.135009	-0.312455	-0.440658	-0.608858	-0.504299	-0.0963774	0.486735	-0.831669	-0.77243	-0.995538	-0.535962	-0.686844	-0.870249	-0.363021	0.313075
2.5	0.0513556	-0.20653	-0.355907	-0.156811	-0.221622	-0.0566445	-0.701128	-0.150536	-0.200918	-0.424751	-0.443263	-0.372059	-0.282276	-0.208155	0.467357	-0.306116	-0.36812	0.0502501	-0.4754	-0.74004	-0.479909	1.04865	-0.775242	-0.639125	0.16253	-0.264904	-0.279758	2.78439	-0.491429	-0.0154376	-1.15207	-0.554845	-0.818212	-0.285873	-0.161392	0.658663	-0.609532	-0.687135	-0.8614	-0.352024	-0.551187	-0.620794	-0.579901	0.334602
2.6	-0.063002	-0.202714	-0.223448	-0.11984	-0.211501	0.162357	-0.182907	-0.222787	-0.303936	-0.342725	0.156291	-0.394324	-0.309824	-0.224233	0.452452	-0.168347	-0.441617	0.197131	-0.394167	-0.603048	-0.453796	1.04394	-0.879852	-0.585205	0.0365952	-0.35318	-0.322208	2.63681	-0.431477	0.148627	-0.270979	-0.645979	-0.631621	-0.272726	-0.176816	0.383111	-0.770615	-0.672589	-0.603938	-0.503033	-0.730845	-0.661639	-0.280305	0.381318
2.7	-0.0355936	-0.217199	-0.495865	-0.090402	-0.266824	-0.0503591	0.170766	-0.0855444	-0.301557	-0.387225	-0.370222	-0.236947	-0.322636	-0.149794	0.156319	-0.225775	-0.489904	0.31715	-0.3747	-0.741844	-0.547747	0.651726	-0.716982	-0.710755	0.202992	-0.448548	-0.533359	2.25346	-0.526373	0.0166675	-0.169805	-0.396251	-0.715239	-0.338328	-0.223257	0.468192	-0.699896	-0.626461	-0.624981	-0.464438	-0.544771	-0.816434	-0.869137	0.0611268
2.8	-0.104234	-0.12007	-0.335769	-0.117184	-0.26912	-0.163206	-0.171477	-0.014902	-0.133445	-0.438488	-0.356552	0.353126	-0.33923	-0.232257	-0.0822529	-0.0343629	-0.231894	-0.331519	-0.388507	-0.67344	-0.529517	1.25963	-0.759822	-0.60196	0.265138	-0.234582	-0.294166	2.0216	-0.507389	-0.0465187	-0.523498	-0.585389	-0.61638	-0.508031	-0.252136	0.427324	-0.751129	-0.729458	-0.780318	-0.282247	-0.805404	-0.81425	-0.449614	0.373966
2.9	0.113134	-0.193981	-0.206913	-0.194315	-0.298245	0.0107408	-0.38063	0.152417	-0.0573572	-0.397744	-0.361768	0.135526	-0.336069	-0.176162	0.184256	-0.141145	-0.284209	0.152298	-0.451871	-0.76285	-0.536509	1.23591	-0.836059	-0.540191	0.0468777	-0.183915	-0.119124	1.86985	-0.340834	-0.0475602	-0.760226	-0.381812	-0.518161	-0.421322	-0.202702	-0.0306029	-0.788595	-0.741892	-1.07127	-0.377774	-0.851071	-0.922375	-0.814829	0.122076
3	-0.0952387	-0.149904	-0.447229	-0.161546	-0.407391	0.219289	-0.109827	0.487773	-0.118779	-0.321235	0.36607	0.286078	-0.319481	-0.251684	0.442806	0.401636	-0.353982	0.0721847	-0.409557	-0.548494	-0.563033	1.47362	-0.755034	-0.704834	0.30685	-0.265301	-0.230118	2.24806	-0.633599	0.040587	-0.400986	-0.624078	-0.695681	-0.465417	-0.323071	0.469802	-0.759118	-0.75786	-0.89409	-0.216705	-0.463282	-0.668054	-0.474629	0.169609
3.1	-0.0219074	-0.205952	-0.291509	-0.173547	-0.332424	0.0743758	-0.357923	-0.0303533	-0.037782	-0.27609	0.553504	-0.182661	-0.395043	-0.243596	0.0491348	0.255987	-0.194329	-0.346604	-0.446146	-0.61982	-0.633828	1.19496	-0.810031	-0.585019	-0.0642462	-0.0848825	-0.12225	2.50958	-0.329059	-0.08241	-0.189904	-0.50771	-0.55475	-0.369102	-0.321799	0.122167	-0.716938	-0.874506	-0.615032	-0.393672	-0.841914	-0.948634	-0.332708	0.443506
3.2	0.0210482	-0.170246	-0.320294	-0.139827	-0.21228	-0.159125	0.212702	0.0350766	0.0397093	-0.174013	0.362756	-0.101695	-0.284586	-0.237758	0.176169	0.0684037	-0.256478	0.00956112	-0.272719	-0.546901	-0.569905	0.675845	-0.806734	-0.496445	-0.0171711	-0.427763	-0.180103	2.31304	-0.00331414	-0.0741608	-0.862452	-0.562405	-0.6711	-0.226278	-0.252736	0.379148	-0.632023	-0.726236	-0.836433	-0.26868	-0.611402	-0.907558	-0.294032	0.326884
3.3	-0.0667162	-0.177043	-0.472702	-0.0806447	-0.220112	0.211284	-0.154942	0.0407138	0.268859	-0.128871	0.261806	-0.367088	-0.31307	-0.181014	0.00368622	-0.160009	-0.396541	-0.0804414	-0.531828	-0.47064	-0.665425	1.02335	-0.709964	-0.498127	-0.0761487	-0.211574	-0.288128	1.90379	-0.882699	-0.18481	-1.00403	-0.686078	-0.538399	-0.592453	-0.368864	0.53126	-0.277919	-0.753902	-1.07789	-0.310468	-0.280445	-0.996018	-0.410988	0.327357
3.4	-0.0111197	-0.181031	-0.203593	-0.134591	-0.265065	-0.0864322	-0.309283	-0.0248978	0.349396	-0.182619	0.0328603	0.0871518	-0.378035	-0.237891	0.111562	-0.193033	-0.471406	0.0335725	-0.489439	-0.69979	-0.637801	1.37632	-0.648166	-0.580943	0.463277	-0.286053	-0.42035	1.44753	-0.43667	0.0523912	-0.334281	-0.732324	-0.678282	-0.40728	-0.501904	0.209042	-0.488776	-0.845606	-0.870549	-0.312712	-0.365813	-0.945929	-0.413356	0.3196
3.5	0.0452963	-0.212851	-0.288023	-0.0676249	-0.114565	-0.110573	-0.200048	-0.11011	0.39836	-0.183369	0.251658	-0.408844	-0.366543	-0.159231	-0.0439335	-0.420461	-0.310643	0.132956	-0.42664	-0.632094	-0.688803	1.05105	-0.586406	-0.414642	0.0471413	-0.206253	-0.454854	1.62178	-0.575386	0.096425	-0.361082	-0.610748	-0.403064	-0.500338	-0.417472	-0.0905791	-0.425113	-0.760397	-0.455423	-0.536063	-0.350436	-0.917995	-0.810765	0.362827
3.6	0.0567811	-0.208299	-0.344574	-0.114644	-0.207679	0.0481392	-0.314455	0.0421622	0.510281	-0.26486	0.414558	-0.357508	-0.35508	-0.196735	0.0914524	0.118339	-0.282887	-0.123012	-0.517951	-0.429049	-0.710471	0.994066	-0.588454	-0.691579	0.0384477	-0.591753	-0.467768	1.7449	-0.521365	-0.106742	-0.462217	-0.656021	-0.730675	-0.631997	-0.381175	0.25314	-0.544648	-0.886157	-0.668706	-0.335971	-0.320783	-1.00546	-0.697465	0.456331
3.7	0.0139262	-0.187908	-0.21333	-0.0989234	-0.330558	0.157767	-0.056756	0.568547	0.109386	-0.355934	-0.302086	-0.0222879	-0.311733	-0.298495	-0.244115	0.0913242	-0.275762	-0.0352022	-0.356877	-0.676949	-0.801018	0.959452	-0.82909	-0.635475	0.0760327	0.349695	-0.488458	1.99522	-0.450301	0.17953	-0.653411	-0.489975	-0.732514	-0.702015	-0.291726	0.22802	-0.443234	-0.80273	-0.773846	-0.379634	-0.676488	-0.920324	-0.598626	0.428989
3.8	0.0907962	-0.0865474	-0.231056	-0.0966889	-0.112067	0.0568138	0.21338	0.198082	0.544205	-0.222612	0.309505	-0.0569325	-0.348177	-0.122793	0.0544757	0.14644	-0.190978	-0.27116	-0.261816	-0.665183	-0.748709	0.883926	-0.628134	-0.579911	0.170601	-0.0650958	-0.534821	2.2287	-0.389945	0.117931	-0.635652	-0.569622	-0.786446	-0.595986	-0.516697	-0.123029	-0.175419	-0.686121	-0.514669	-0.348115	-0.356078	-0.91232	-0.590386	0.313756
3.9	-0.0182148	-0.0533051	-0.372305	-0.111888	-0.331007	0.126668	0.602443	3.16753	0.344673	-0.234179	0.700503	-0.152175	-0.316264	-0.170859	0.26723	0.135569	-0.142592	0.195863	-0.338781	-0.339288	-0.646814	0.78642	-0.546831	-0.616776	0.0804282	0.204146	-0.31223	4.51672	-0.371556	0.278593	-0.50969	-0.484833	-0.847496	-0.147685	-0.366077	0.160665	-0.425085	-0.883744	-0.609278	-0.297059	-0.191157	-0.72924	-0.417236	0.445176
4	0.065267	-0.00247743	-0.529565	-0.135277	-0.212851	0.09109	0.308696	8.70077	0.672527	-0.228468	0.779324	0.076411	-0.283784	-0.0482074	0.597307	-0.0513206	-0.0381557	0.269851	-0.392183	-0.245612	-0.670503	0.428071	-0.575683	-0.646508	-0.097549	0.287852	-0.34175	9.26611	-0.340927	0.75958	-0.558797	-0.617463	-1.14503	-0.426792	-0.434835	-0.26839	-0.364254	-0.772418	-0.0451809	-0.343659	-0.267731	-0.873775	-0.499004	0.483287
4.1	0.0149426	-0.0409719	-0.376369	-0.179777	-0.318742	-0.0154448	-0.391874	12.3442	0.667135	-0.467559	0.752797	-0.0887953	-0.306515	-0.0922776	0.749818	-0.316084	-0.172184	0.0532379	-0.561432	-0.00935863	-0.677457	0.569199	-0.484458	-0.492913	0.0152862	-0.0836505	-0.235199	10.8461	-0.247135	0.551176	-0.602197	-0.509792	-1.1388	-0.442859	-0.419562	-0.205926	-0.334037	-0.881706	-0.6479	-0.395045	-0.157441	-1.02317	-0.319721	0.359526
4.2	0.0882355	-0.00388353	-0.3411	-0.21939	-0.62562	-0.298351	0.163819	14.0856	0.435829	-0.526172	1.03493	-0.0950246	-0.260498	0.130466	0.479693	-0.441869	-0.194693	-0.0984005	-0.63309	-0.38366	-0.815102	0.547215	-0.680048	-0.554299	-0.293889	-0.196347	-0.42265	11.4759	-0.50512	0.678321	-0.789876	-0.370304	-1.30016	-0.502857	-0.578139	-0.421391	-0.694998	-0.890149	-0.687445	-0.467606	-0.311347	-0.779776	-0.596635	0.0814387
4.3	0.0596153	0.067682	-0.309382	-0.203184	-0.578412	-0.151589	0.287075	14.0918	0.429152	-0.328862	0.886962	-0.359078	-0.245352	-0.0318612	0.255355	-0.307145	-0.245215	0.124299	-0.759667	-0.123338	-0.778777	0.0460778	-0.567689	-0.843127	-0.238562	-0.283996	-0.401586	11.0161	-0.276322	0.7358	-0.91649	-0.350087	-1.27884	-0.438423	-0.554812	-0.226758	-0.453456	-0.739571	-0.516458	-0.33893	-0.64643	-0.91985	-0.38018	0.0430077
4.4	0.0330221	-0.120845	-0.356941	-0.253202	-0.377938	0.0273224	-0.085632	13.7288	0.361066	-0.437123	0.927992	-0.353827	-0.331171	0.10501	0.250982	-0.0905601	-0.175248	-0.217065	-0.549162	-0.358308	-0.761013	0.37997	-0.503386	-0.725882	-0.137895	-0.377464	-0.590236	11.0146	-0.416236	0.599625	-0.568477	-0.375377	-1.26347	-0.484989	-0.590493	-0.175421	-0.572447	-0.829112	-0.638151	-0.458556	-0.297054	-1.07258	-0.34504	-0.0240576
4.5	0.110724	-0.0155806	-0.285126	-0.099955	-0.44575	-0.254378	0.153811	13.6252	0.352753	-0.356867	0.880318	-0.391466	-0.346195	-0.0517517	0.202821	-0.398206	-0.217628	-0.111204	-0.568549	-0.295434	-0.813543	0.417145	-0.749603	-0.36251	-0.00225038	-0.329917	-0.587653	10.6938	-0.106715	0.292313	-0.467286	-0.502921	-1.26773	-0.459324	-0.571703	-0.540812	-0.495853	-0.852535	-0.700539	-0.39013	-0.602893	-1.06005	-0.800092	0.0823328
4.6	-0.0108467	-0.0484701	-0.459233	-0.185722	-0.443971	-0.337603	0.0852507	13.0353	0.210629	-0.236163	1.06763	-0.0937853	-0.298904	0.0262839	0.136418	-0.508505	-0.250783	-0.160982	-0.671305	-0.418181	-0.787985	0.3188	-0.754518	-0.644172	-0.0980326	-0.351554	-0.644532	9.95189	-0.399689	0.349501	-0.571259	-0.330871	-1.34085	-0.796126	-0.440748	-0.512592	-0.637122	-0.737381	-0.518722	-0.41319	-0.946067	-0.82532	-0.600194	-0.32247
4.7	-0.138767	-0.0594923	-0.417937	-0.165013	-0.353856	-0.0084672	-0.441578	12.1818	0.389686	-0.351442	0.525383	-0.220116	-0.384802	0.0569139	-0.0310683	-0.612446	-0.27894	0.0806989	-0.630772	-0.511433	-0.756053	0.131528	-0.726434	-0.466253	-0.246585	-0.214352	-0.577233	9.49541	-0.650022	0.382825	-0.43367	-0.484205	-1.12149	-0.613483	-0.46552	-0.354358	-0.722687	-0.882284	-0.781487	-0.469691	-0.950203	-1.01262	-0.596849	-0.012563
4.8	0.111234	-0.00595084	-0.362867	-0.187855	-0.278888	0.0686805	-0.346067	11.0965	0.0435099	-0.290942	0.871339	-0.321684	-0.413135	0.0466196	-0.0295171	-0.109768	-0.246671	0.0362887	-0.567844	-0.532424	-0.794373	0.448884	-0.487044	-0.478201	-0.104381	-0.28483	-0.493083	9.27258	-0.535045	0.40244	-0.647759	-0.5598	-1.19086	-0.700184	-0.530175	-0.279481	-0.731218	-0.774918	-0.946131	-0.468577	-0.922862	-1.13666	-0.616099	-0.096266
4.9	-0.0529896	-0.12386	-0.307446	-0.141645	-0.339152	0.0998759	0.274498	11.1289	0.19725	-0.447793	0.777625	-0.713211	-0.322014	0.124236	0.04147	-0.149568	-0.377655	-0.343763	-0.734805	-0.309707	-0.730565	0.0981026	-0.700709	-0.50797	-0.23635	-0.327594	-0.598269	8.17445	-0.54392	0.264435	-0.598515	-0.557497	-0.932982	-0.604376	-0.485639	-0.295168	-0.854767	-0.744427	-0.859099	-0.573652	-0.925061	-0.99249	-0.600509	0.0575727
5	0.0549302	-0.109915	-0.41	-0.256216	-0.450365	-0.261031	-0.393381	9.97074	0.0876494	-0.292333	0.761058	-0.381909	-0.358289	-0.0308769	-0.222392	-0.0936405	-0.392049	-0.123447	-0.614922	-0.658562	-0.768026	0.265144	-0.545265	-0.596075	0.108519	-0.19702	-0.487631	7.6567	-0.362173	0.187842	-0.635478	-0.705836	-1.09202	-0.589274	-0.608935	-0.151293	-0.797519	-0.983866	-0.963845	-0.478733	-1.03671	-0.936728	-0.439724	-0.136778
5.1	-0.0778728	-0.145042	-0.406464	-0.0740141	-0.342129	-0.142644	-0.104573	9.59294	0.143875	-0.22991	-0.00678836	-0.266778	-0.292218	-0.0208919	-0.30518	-0.299682	-0.115858	0.170682	-0.627668	-0.846385	-0.787144	0.467134	-0.55214	-0.626742	-0.239151	-0.376151	-0.57622	7.62087	-0.391051	0.182079	-0.400638	-0.608593	-0.986314	-0.63461	-0.494419	-0.297296	-0.754515	-0.874365	-1.08399	-0.393321	-1.48277	-1.13651	-0.415563	-0.0742952
5.2	0.159563	-0.182149	-0.520741	-0.161085	-0.270623	-0.111078	-0.400284	9.1879	0.0280697	-0.353687	0.507459	-0.189512	-0.371652	-0.0710899	-0.416647	-0.211251	-0.298698	-0.292338	-0.387406	-0.844679	-0.85046	0.65094	-0.645618	-0.659718	-0.12212	-0.685801	-0.521679	6.86261	-0.369001	0.558749	-0.597579	-0.57844	-1.05373	-0.662878	-0.671385	-0.431447	-0.690768	-0.846284	-0.832978	-0.409094	-0.986253	-0.834119	-0.522934	0.019305
5.3	0.0322956	-0.137494	-0.488691	-0.165801	-0.393372	-0.207286	-0.23109	8.57558	-0.121186	-0.357972	0.349819	-0.442863	-0.329287	-0.0614806	-0.230361	-0.235235	-0.35386	-0.0945924	-0.640877	-0.79135	-0.744022	0.599097	-0.637198	-0.632927	0.00347103	-0.347797	-0.489155	6.7532	-0.842774	0.21644	-0.52989	-0.385795	-1.12483	-0.725917	-0.570377	-0.53283	-0.774368	-0.783069	-1.193	-0.495189	-1.27265	-0.935051	-0.612971	-0.205183
5.4	-0.248339	-0.138036	-0.206802	-0.180416	-0.411456	0.116755	-0.0883155	8.28891	-0.14089	-0.114737	0.131954	-0.479858	-0.329521	-0.021559	-0.477595	-0.105479	-0.297732	-0.108787	-0.659693	-0.529657	-0.761493	0.303954	-0.735653	-0.673576	0.0704996	-0.375135	-0.69103	6.93045	-0.519475	0.280371	-0.483138	-0.592581	-1.1221	-0.389493	-0.50944	-0.466944	-0.69873	-0.94703	-0.736782	-0.392406	-1.04309	-0.944938	-0.354412	0.0733472
5.5	0.122221	-0.214727	-0.272178	-0.233007	-0.0544369	-0.0550631	0.316157	7.83821	-0.259341	-0.344706	0.175381	-0.47527	-0.324564	-0.129657	-0.128738	-0.285372	-0.431257	-0.217088	-0.55426	-0.632932	-0.83073	0.520413	-0.442216	-0.556362	0.0879454	-0.335786	-0.541242	6.36624	-0.220816	0.133676	-0.352278	-0.559174	-0.604485	-0.518353	-0.502609	-0.255	-0.596133	-0.858237	-0.869338	-0.398503	-1.10058	-1.21616	-0.0879002	-0.0665533
5.6	0.0894585	-0.1455	-0.176034	-0.1034	-0.258345	0.0670215	-0.156182	7.54618	-0.284062	-0.530834	0.549464	-0.187118	-0.385391	-0.182779	-0.0927559	-0.0246957	-0.0835837	-0.729668	-0.460757	-0.554834	-0.75545	0.263514	-0.556211	-0.66137	-0.0503353	-0.343556	-0.568166	6.11158	-0.476927	0.11338	0.0151033	-0.47102	-0.697148	-0.459307	-0.396729	-0.245097	-0.714497	-0.881361	-0.728121	-0.427226	-1.20577	-1.05826	-0.394783	0.272087
5.7	0.00899592	-0.0117565	-0.281609	-0.116953	-0.372437	0.00192081	-0.214523	6.66194	-0.0808939	-0.250668	0.51209	-0.512743	-0.389728	-0.225052	0.155527	0.426717	-0.290797	-0.308925	-0.457865	-0.810134	-0.793929	0.598002	-0.735115	-0.59298	-0.085897	-0.403815	-0.546053	5.83373	-0.486122	0.00770264	-0.143396	-0.559192	-0.74361	-0.424674	-0.404927	-0.29075	-0.537709	-0.796941	-0.319695	-0.509693	-0.955541	-0.882825	0.0276996	0.0945366
5.8	-0.0331751	-0.202333	-0.236319	-0.186771	-0.120798	-0.035672	-0.450878	6.73156	-0.0767789	-0.232002	0.695995	-0.284321	-0.370261	-0.191208	-0.0504998	0.205557	-0.245527	-0.198982	-0.386818	-0.762116	-0.836345	0.661899	-0.773353	-0.430958	-0.209044	-0.435758	-0.442929	5.07654	-0.177149	0.0496522	-0.222779	-0.561517	-0.58846	-0.515281	-0.560893	-0.265396	-0.858583	-0.866437	-0.519574	-0.46913	-1.12006	-0.929875	-0.0732723	-0.173858
5.9	-0.0405714	-0.105362	-0.317235	-0.0445093	-0.227069	0.0897376	-0.0669081	5.98241	0.0468948	-0.390136	0.541899	-0.457362	-0.336362	-0.225092	0.10884	-0.156662	-0.212199	-0.10137	-0.499633	-0.810117	-0.819958	0.617803	-0.576264	-0.805538	0.121518	0.0462702	-0.664685	5.18621	-0.506863	0.435174	-0.197362	-0.58168	-0.761805	-0.641166	-0.53114	-0.370452	-0.751584	-0.737724	-0.662941	-0.502518	-0.875215	-1.06153	-0.109117	-0.0615203
6	0.0650528	-0.237471	-0.282232	-0.276196	-0.157616	-0.308152	-0.348125	5.84597	0.0239964	-0.271931	0.394135	-0.241048	-0.370561	-0.0157047	-0.0902252	0.184875	-0.29691	-0.219533	-0.539865	-0.873692	-0.78861	0.448929	-0.50055	-0.472636	0.0463103	-0.499819	-0.730931	4.69613	-0.347241	-0.198815	-0.338815	-0.590077	-0.752938	-0.499176	-0.678951	-0.326581	-0.476102	-0.71281	-0.870904	-0.441519	-0.93977	-0.901661	-0.282479	0.0394242
6.1	0.0376896	-0.263328	-0.337885	-0.178257	-0.271547	-0.285007	-0.0969912	5.45798	0.0320255	-0.394311	0.373281	-0.205755	-0.387824	-0.134295	-0.0408313	0.0455528	-0.160216	-0.346804	-0.517114	-0.786898	-0.818998	0.441152	-0.568074	-0.793162	0.0492064	-0.0681243	-0.573106	4.40032	-0.226813	0.163752	-0.187084	-0.624679	-0.380552	-0.69515	-0.506431	-0.122842	-0.882272	-0.743989	-0.724344	-0.450916	-0.925509	-0.985979	-0.30622	0.0274838
6.2	0.0653856	-0.126929	-0.407653	-0.11706	-0.0973018	-0.200201	-0.24461	4.60562	-0.123119	-0.34611	0.524473	-0.466489	-0.407905	-0.204718	-0.297721	0.364632	-0.217161	-0.118912	-0.539603	-0.734789	-0.809499	0.143739	-0.815789	-0.652672	0.00930967	-0.505914	-0.724415	3.79399	-0.524403	0.0131722	-0.263267	-0.694197	-0.616351	-0.510509	-0.531274	-0.259723	-0.797299	-0.807999	-0.976268	-0.413034	-0.716825	-1.16704	-0.612268	0.290454
6.3	0.0753444	-0.139055	-0.321356	-0.131359	-0.37416	-0.368301	0.253069	4.41785	0.0412156	-0.277655	0.850485	-0.337788	-0.38454	-0.127464	-0.0039782	-0.120283	-0.325427	0.0305303	-0.448868	-0.678592	-0.758892	0.286611	-0.588817	-0.518667	0.0938983	-0.405541	-0.756358	3.78572	-0.133449	0.0816094	-0.449204	-0.48955	-0.54046	-0.529961	-0.509125	0.0342085	-0.722943	-0.703702	-0.729281	-0.483601	-1.05988	-0.842744	-0.358781	-0.184263
6.4	0.054373	-0.137092	-0.303269	-0.166502	-0.178748	-0.0865137	0.124167	4.13872	0.2003	-0.236601	1.2863	-0.493516	-0.362644	-0.223684	-0.0811607	-0.0664533	-0.292743	-0.474236	-0.245744	-0.788438	-0.863551	0.335214	-1.03029	-0.568924	0.0336014	-0.104154	-0.666667	3.2147	-0.321617	-0.162041	-0.131489	-0.661118	-0.462734	-0.527364	-0.637555	-0.256482	-0.503852	-0.821392	-0.612529	-0.380526	-0.658014	-0.805456	-0.246049	0.093445
6.5	-0.228981	-0.0801084	-0.379532	-0.0505477	-0.280049	0.159013	0.0702655	4.08841	-0.00738162	-0.204149	0.976286	-0.444584	-0.429324	-0.121935	-0.523229	0.0387533	-0.391621	0.437999	-0.403159	-0.776239	-0.830296	0.342314	-0.75077	-0.672415	0.511234	0.0446993	-0.753227	3.31962	-0.402291	0.153756	-0.192633	-0.504868	-0.193412	-0.386959	-0.551204	-0.480467	-0.513293	-0.833886	-0.900246	-0.408696	-0.851271	-0.640414	-0.903519	-0.106602
6.6	0.0631261	-0.0514636	-0.237801	-0.0713834	-0.391297	0.400347	-0.208566	3.46241	-0.15773	-0.235186	0.976038	-0.443636	-0.323797	-0.254675	-0.524775	0.00396822	-0.397785	-0.200865	-0.500105	-0.665181	-0.90323	0.0815482	-0.84071	-0.792676	0.22147	-0.15659	-0.707919	2.39948	-0.0211463	0.170971	-0.198433	-0.570669	-0.501857	-0.464541	-0.587264	-0.310492	-0.675809	-0.766955	-0.773109	-0.39395	-0.688953	-0.716889	-0.55314	0.182282
6.7	-0.0192053	-0.132142	-0.288332	-0.0891666	-0.205226	0.11484	-0.0363718	3.25069	-0.10549	-0.235931	0.807501	-0.369724	-0.375192	-0.287235	-0.0447547	0.0268909	-0.367074	-0.044383	-0.452286	-0.642019	-0.788576	0.181991	-0.800919	-0.700094	0.0119761	-0.276404	-0.611109	2.82084	-0.0722876	0.145619	0.0306671	-0.589162	-0.468683	-0.559566	-0.475271	-0.182412	-0.622823	-0.672736	-0.793362	-0.4555	-0.829782	-0.660373	-0.48147	-0.0584573
6.8	-0.148048	-0.164494	-0.277938	-0.102291	-0.345596	-0.0521682	-0.74538	2.84604	-0.194643	-0.427825	0.687561	-0.510924	-0.351324	-0.259414	-0.554304	0.0959113	-0.319156	-0.00543242	-0.477711	-0.848996	-0.842764	0.309251	-0.607729	-0.783782	0.235472	-0.680792	-0.604194	2.48094	-0.104677	0.22127	0.105684	-0.591391	-0.454017	-0.569058	-0.514333	-0.242976	-0.455699	-0.758192	-0.312579	-0.531621	-0.708297	-0.898931	-0.443397	0.0403415
6.9	-0.0368268	-0.146852	-0.239908	-0.0912261	-0.286578	-0.115013	-0.556875	2.8673	-0.0918664	-0.252205	0.684736	-0.503987	-0.385343	-0.256702	-0.310169	-0.0231337	-0.362655	-0.460732	-0.740612	-0.760275	-0.874347	0.443437	-0.746555	-0.669613	-0.0700239	-0.29394	-0.684218	2.5557	-0.105336	0.0223959	-0.278159	-0.707538	-0.754316	-0.417303	-0.488224	-0.407154	-0.525138	-0.76116	-0.73749	-0.466615	-0.872151	-0.728201	-0.298107	0.354535
7	-0.129879	-0.117286	-0.277621	-0.273144	-0.294203	0.0422526	-0.0436462	2.61641	0.188284	-0.163368	0.846274	-0.418345	-0.363031	-0.14175	-0.0752897	0.121663	-0.511099	-0.296729	-0.538289	-0.808062	-0.839141	0.187086	-0.585116	-0.708609	0.0725764	-0.0316084	-0.591836	2.60263	-0.721351	-0.104538	-0.243167	-0.687161	-0.379422	-0.572166	-0.595172	-0.10656	-0.573622	-0.817671	-0.90789	-0.32902	-0.769912	-0.709507	-0.266842	-0.00200422
7.1	0.0233733	-0.109527	-0.0625711	-0.0695058	-0.278633	0.041476	-0.420325	2.48666	-0.0988595	-0.410701	0.834797	0.258862	-0.343488	-0.178259	-0.399605	0.0860934	-0.315168	0.130964	-0.565366	-0.949696	-0.794346	0.108906	-0.793212	-0.927049	0.196221	-0.378495	-0.625092	1.64014	-0.109593	-0.0421767	0.00148268	-0.729656	-0.438944	-0.508925	-0.52787	-0.162006	-0.352283	-0.758443	-0.536936	-0.462066	-0.343125	-0.874262	-0.152406	0.103492
7.2	-0.0310409	-0.128394	-0.113196	-0.122286	-0.258003	0.232166	-0.506774	1.99599	0.262902	-0.135538	1.04825	0.0777473	-0.340254	-0.172307	-0.0868141	-0.0219095	-0.340005	-0.156641	-0.464396	-0.796569	-0.869239	0.507136	-0.421493	-0.458317	0.384337	0.0618112	-0.544363	1.35245	-0.181976	-0.0325284	0.257101	-0.512662	-0.214511	-0.402367	-0.513813	-0.0181184	-0.183405	-0.744301	-0.161849	-0.379417	-0.461638	-0.546186	-0.249841	0.329905
7.3	0.0319627	-0.08532	-0.255584	-0.0432372	-0.391424	0.224349	-0.308888	2.04805	0.016834	-0.271943	1.04263	0.529298	-0.353506	-0.304765	-0.270411	0.00806306	-0.453194	0.138256	-0.5391	-0.520574	-0.759623	0.065614	-0.534788	-0.524891	0.181751	-0.327396	-0.492507	1.48412	0.0609657	0.0858979	-0.0164848	-0.31838	-0.230229	-0.509817	-0.498483	0.0637085	-0.321158	-0.821463	-0.53916	-0.383879	-0.0464524	-0.313749	-0.309972	0.105389
7.4	0.0139262	-0.146859	-0.128075	-0.131654	-0.278666	0.301063	-0.25787	1.83261	0.0742928	-0.118128	1.21446	0.484051	-0.326499	-0.220989	-0.217099	0.197169	-0.202169	-0.188671	-0.391931	-0.694617	-0.89676	0.229053	-0.585307	-0.619431	0.111582	0.154608	-0.272273	1.33806	0.0802972	0.168379	-0.521899	-0.591069	-0.221425	-0.433557	-0.66815	0.0634372	-0.40147	-0.866175	-0.408517	-0.40999	0.293099	-0.333171	-0.217332	0.227377
7.5	-0.00379254	-0.194684	-0.103526	-0.197275	-0.434957	0.532227	-0.463554	1.62799	-0.271107	-0.253307	0.954674	0.372763	-0.35016	-0.386185	-0.368893	0.325068	-0.2913	0.046719	-0.501688	-0.503997	-0.779837	-0.0439739	-0.452188	-0.519135	0.0732557	0.137283	-0.305375	1.22884	0.0990098	-0.306355	-0.0119722	-0.238755	-0.353086	-0.420267	-0.45866	0.189623	-0.340551	-0.897403	-0.611827	-0.334466	-0.0963259	-0.529517	-0.639591	0.407686
7.6	0.00110743	-0.232637	-0.311104	-0.165966	-0.397051	-0.0245	-0.479844	1.25284	0.118039	-0.166418	0.578435	0.488514	-0.322309	-0.199151	-0.271726	-0.0304791	-0.28457	0.0475882	-0.545545	-0.810257	-0.828135	-0.0463686	-0.852158	-0.706526	0.129325	-0.138523	-0.354491	1.25775	0.0678054	0.0156318	-0.0937401	-0.545709	-0.34052	-0.296463	-0.506602	0.0811616	-0.54335	-0.691212	-0.254597	-0.38702	-0.0393862	-0.402579	-0.738692	-0.0780718
7.7	-0.127271	-0.140224	-0.293796	-0.121484	-0.212121	0.224981	-0.655182	1.34679	0.143224	-0.158032	0.845022	0.885786	-0.381058	-0.135539	-0.0192067	-0.109348	-0.250344	-0.0633727	-0.512642	-0.669444	-0.780129	0.035417	-0.756799	-0.843725	0.0600277	0.302997	-0.432127	1.09047	0.391793	-0.0979273	0.324223	-0.496292	-0.0958769	-0.313196	-0.569074	0.0699382	-0.533356	-0.847392	-0.649179	-0.35133	0.160269	-0.287453	-0.775261	0.0521566
7.8	-0.102033	-0.14439	-0.00882817	-0.127887	-0.208024	0.426246	-0.363453	1.3625	0.151424	-0.24924	0.539467	1.32994	-0.38872	-0.267509	0.0539958	0.0907552	-0.332174	-0.381065	-0.48334	-0.712944	-0.800095	-0.132001	-0.337019	-0.5212	-0.0108957	-0.31569	-0.327541	1.3899	-0.0107586	-0.00611678	-0.33149	-0.55456	-0.283589	-0.423838	-0.513643	-0.0624056	-0.260745	-0.839864	-0.468	-0.435176	0.167086	-0.285387	-0.130914	0.33145
7.9	-0.0656831	-0.144897	-0.0828029	-0.0765343	-0.410148	0.341988	0.0074902	1.3732	0.0391921	-0.393525	0.664655	1.59094	-0.352781	-0.24313	-0.240134	0.060119	-0.382546	-0.36162	-0.369026	-0.805783	-0.756217	0.332374	-0.617557	-0.566688	0.15666	0.125963	-0.278113	0.762897	0.274573	-0.248914	-0.0340746	-0.51139	-0.340344	-0.250659	-0.598887	-0.0429522	-0.373646	-0.799369	-0.199867	-0.204444	-0.0457951	-0.271498	-0.832502	0.283696
8	0.0125761	-0.0850176	-0.177241	-0.0532239	-0.452308	0.322327	-0.163795	1.37547	0.0691084	-0.263418	0.493798	1.45958	-0.370587	-0.146113	-0.135569	-0.127695	-0.304287	0.231796	-0.504199	-0.529621	-0.822845	0.31692	-0.642265	-0.645856	0.464706	-0.094146	-0.106835	1.02362	0.314509	-0.0768188	0.0846339	-0.519508	-0.427841	-0.351261	-0.52936	0.361219	-0.316089	-0.739189	-0.0752443	-0.31553	0.186071	-0.17987	-0.561686	0.283198
8.1	-0.0832221	-0.139789	-0.0823788	-0.196283	-0.233435	0.468187	-0.100176	0.860868	0.0352893	-0.230386	0.271329	1.42682	-0.354752	-0.253203	-0.00310683	0.49064	-0.480748	-0.430667	-0.420993	-0.745369	-0.895723	-0.0245998	-0.592832	-0.572296	0.217418	0.0229923	-0.0537066	0.773998	0.449414	-0.368675	0.0577426	-0.353706	-0.149959	-0.312523	-0.560929	0.061327	-0.30917	-0.748699	-0.649644	-0.350347	0.0346005	-0.0629591	-0.876466	0.278023
8.2	0.0286352	-0.170786	-0.0175028	-0.196664	-0.359697	0.144552	-0.311697	0.950976	0.151713	-0.363041	0.3938	1.34046	-0.327442	-0.320291	0.259444	0.546041	-0.468718	0.100796	-0.44185	-0.712862	-0.884618	0.138692	-0.666555	-0.707564	0.312705	-0.146931	-0.108361	1.20856	0.0386446	-0.606496	0.142135	-0.592891	-0.337576	-0.0711899	-0.46018	0.108527	-0.13969	-0.730613	-0.597813	-0.395772	-0.0462529	-0.299916	-0.568721	0.17086
8.3	-0.0511115	0.0130676	-0.221936	-0.208125	-0.359689	0.178082	-0.206593	0.796132	0.0270029	-0.247548	0.455544	0.632406	-0.303963	-0.170786	-0.335981	0.127632	-0.331815	-0.292402	-0.480259	-0.746615	-0.684979	0.102661	-0.70847	-0.731713	0.387038	-0.275482	-0.127693	0.768451	0.192771	-0.193079	-0.0217341	-0.506668	-0.331902	-0.336654	-0.283337	-0.00698595	-0.283389	-0.749243	-0.311717	-0.375785	0.0612768	-0.306426	-0.517426	0.299923
8.4	-0.00310988	-0.00732346	-0.244479	-0.0940276	-0.49767	0.221745	-0.42272	0.727585	-0.0264155	-0.189046	0.591112	1.12982	-0.331396	-0.26047	-0.105978	0.356637	-0.410652	0.395683	-0.381511	-0.684726	-0.633559	-0.102932	-0.549878	-0.631018	0.121577	-0.274084	-0.0524926	0.511493	0.15232	-0.0746443	-0.368449	-0.436747	-0.447944	-0.427575	-0.346871	-0.125919	-0.395067	-0.771009	-0.758545	-0.339528	-0.25182	-0.151284	-1.10593	0.129133
8.5	-0.218236	-0.0718382	-0.310517	-0.2667	-0.442618	0.356428	-0.432601	0.713603	-0.0397197	-0.344732	0.225849	0.807349	-0.363892	-0.34603	-0.029289	0.285423	-0.279394	-0.521955	-0.414722	-0.765163	-0.558048	0.2835	-0.646767	-0.605147	0.192009	-0.19646	-0.071614	0.599594	0.174908	-0.406293	-0.170156	-0.586516	-0.139053	-0.190676	-0.340576	-0.151081	-0.384841	-0.870142	-0.855631	-0.355285	0.0294761	-0.190118	-0.330526	0.235808
8.6	-0.0210767	0.00523103	-0.347446	-0.169436	-0.154714	0.0488578	-0.556478	0.604276	0.102595	-0.180113	0.258914	0.667223	-0.395279	-0.25689	0.0835622	0.016886	-0.234106	-0.456627	-0.544158	-0.714493	-0.679189	0.183733	-0.508161	-0.6999	0.270195	-0.341673	-0.303182	0.672566	0.0231249	-0.168403	-0.0887782	-0.437519	-0.22114	-0.446708	-0.448256	-0.268142	-0.503198	-0.740195	-0.736239	-0.478966	-0.32904	-0.097258	-0.994486	0.7633
8.7	-0.094947	-0.0684064	-0.12716	-0.178691	-0.351304	-0.0305368	-0.271398	0.777546	0.128336	-0.269699	-0.094548	1.07116	-0.385058	-0.195823	0.0323913	0.285422	-0.20785	-0.213613	-0.447278	-0.693113	-0.580181	0.20306	-0.451426	-0.593141	0.119974	-0.313821	-0.152164	0.739417	0.570622	-0.101272	-0.0766218	-0.44175	-0.105045	-0.360679	-0.335172	-0.0411945	-0.387629	-0.93905	-1.15567	-0.364167	-0.464739	-0.228489	-0.505491	0.520591
8.8	-0.101362	-0.113527	-0.216973	0.00936062	-0.0656215	0.127711	-0.310438	0.251997	0.0157621	-0.0964084	0.0946432	0.630248	-0.352555	-0.212913	-0.342746	0.465753	-0.0841888	-0.339321	-0.46772	-0.530163	-0.542894	0.187416	-0.498573	-0.682329	0.131472	-0.469487	-0.301349	0.664329	0.369153	-0.184266	-0.0336142	-0.671082	-0.254536	-0.412428	-0.386783	-0.171348	-0.450216	-0.873856	-0.584013	-0.542954	-0.694042	-0.46356	-1.01879	0.66611
8.9	-0.0610304	-0.103667	-0.291007	-0.147241	-0.173521	0.00752642	-0.324705	0.774537	0.39093	0.0646318	0.326698	0.85921	-0.389582	-0.354949	-0.412727	0.313406	-0.334211	-0.0733749	-0.573947	-0.527333	-0.669355	0.116478	-0.536775	-0.768427	0.299737	-0.406159	-0.247788	1.06401	0.61389	-0.030325	0.0308513	-0.371029	-0.193723	-0.411149	-0.389634	-0.0639645	-0.476254	-0.89556	-0.708302	-0.363605	-0.535987	-0.399788	-0.655238	0.467025
9	-0.0757225	-0.0837472	-0.166352	-0.055234	0.0673328	0.260341	-0.018066	0.700525	0.483295	-0.10905	0.0333825	0.72366	-0.370715	-0.30527	-0.513436	0.350955	-0.441921	-0.308889	-0.462914	-0.309258	-0.777503	0.437121	-0.0682836	-0.560299	-0.0708004	-0.382389	-0.282119	1.41517	0.549511	-0.227145	0.277694	-0.489928	-0.238058	-0.441649	-0.535034	-0.176428	-0.303376	-0.689142	-0.88357	-0.477527	-0.833121	-0.271293	-0.749678	0.351385
9.1	-0.119171	-0.0689458	-0.322936	-0.114184	-0.187527	0.0854616	-0.642298	0.61563	0.424472	-0.114588	0.190898	0.578917	-0.384202	-0.38396	-0.25381	-0.010427	-0.281777	-0.0893707	-0.453233	-0.563213	-0.772021	0.446171	-0.190508	-0.608731	0.213961	-0.457293	-0.444998	1.34485	0.119843	-0.0318785	0.239902	-0.359198	-0.251844	-0.363354	-0.446835	-0.105717	-0.25182	-0.773373	-0.690896	-0.473582	-0.10902	-0.53237	-0.618897	0.365112
9.2	-0.090006	0.0162239	-0.314808	-0.0936767	-0.185582	-0.167538	-0.290958	0.862818	0.765647	-0.148213	0.0576868	0.593728	-0.349222	-0.279387	-0.264759	0.260489	-0.194768	-0.12427	-0.366074	-0.314314	-0.693936	0.533613	-0.527242	-0.660836	0.0745222	-0.806772	-0.438751	0.762735	-0.183511	-0.236629	0.693513	-0.783625	-0.359647	-0.539925	-0.475557	-0.120581	-0.366658	-0.892045	-0.98422	-0.403436	-0.737854	-0.628183	-0.792071	0.438705
9.3	-0.17836	0.102251	-0.44913	-0.145942	-0.0377977	-0.0524054	-0.820807	0.751891	0.813436	-0.0755676	-0.014733	0.570023	-0.369701	-0.37961	-0.256587	0.166997	-0.288414	0.0157541	-0.386291	-0.459264	-0.772297	0.912341	-0.411364	-0.717554	0.340593	-0.395634	-0.407981	0.578353	-0.0949481	0.208215	0.0635445	-0.670914	-0.377021	-0.464762	-0.430965	-0.0324508	-0.487013	-0.899063	-1.08353	-0.441019	-0.212299	-0.759123	-0.728337	0.183931
9.4	-0.0879283	0.16205	-0.252901	-0.0459735	-0.265639	0.485851	-0.702665	0.741259	0.740121	-0.230782	-0.0945447	0.12825	-0.40068	-0.379814	-0.39933	0.178754	-0.173069	-0.331814	-0.301533	-0.649636	-0.686568	0.583954	-0.27379	-0.688206	0.0692709	0.316205	-0.186922	0.590163	-0.0844912	0.037294	-0.0499147	-0.523397	-0.525345	-0.474036	-0.458018	-0.163863	-0.648397	-0.798376	-1.24383	-0.331189	-0.202331	-0.781794	-0.536981	0.43515
9.5	-0.0888323	0.228721	-0.292417	-0.0751442	-0.0358583	0.0147784	-0.40003	0.623819	0.593599	-0.0686144	0.204522	0.712503	-0.36415	-0.295427	-0.192517	0.33178	-0.361843	-0.189053	-0.22857	-0.699255	-0.664093	0.921934	-0.454234	-0.673872	0.540323	-0.20009	-0.246366	0.357345	-0.0907541	-0.0534899	-0.395114	-0.750981	-0.706404	-0.351544	-0.366585	0.07842	-0.205863	-0.822474	-0.746698	-0.455456	0.0186767	-0.606825	-0.269833	0.420457
9.6	0.0660602	0.151352	-0.179493	-0.0236428	-0.114366	0.0484662	-0.0881469	0.845354	0.460452	-0.1506	-0.17381	0.0030713	-0.304692	-0.168819	-0.212735	0.224927	-0.242405	0.0779664	-0.315748	-0.338226	-0.65946	1.22516	-0.183166	-0.703004	0.253545	-0.093502	-0.0665001	0.730404	0.163834	-0.121513	0.377269	-0.564814	-0.471835	-0.0807734	-0.450486	0.0640181	-0.365344	-0.786568	-0.367135	-0.398176	-0.351284	-0.632548	-0.533444	0.400401
9.7	-0.08593	0.126487	-0.248195	-0.0999196	-0.0723688	0.162038	-0.392975	0.650361	0.636955	-0.137306	-0.158471	0.387733	-0.33142	-0.2497	-0.0850508	-0.0631331	-0.192547	-0.132597	-0.242057	-0.655205	-0.646755	1.09321	-0.458321	-0.546694	0.168208	-0.0781728	-0.142608	0.227201	0.0278241	0.220084	0.21853	-0.416412	-0.41987	-0.20032	-0.455127	-0.216052	-0.271026	-0.774062	-0.751019	-0.386558	-0.248771	-0.677109	-0.513293	0.569898
9.8	0.00389874	0.0930423	-0.239247	-0.0280976	-0.245719	0.124662	0.0624316	0.820742	0.630982	-0.203904	-0.137967	0.121718	-0.339702	-0.289406	-0.471952	0.156499	-0.309974	-0.254453	-0.316024	-0.875056	-0.576659	0.961862	-0.282864	-0.378741	0.22795	-0.0403198	-0.148368	0.694711	-0.00234338	0.052019	-0.159382	-0.521688	-0.268595	-0.267233	-0.277831	0.153979	-0.474038	-0.85592	-0.562646	-0.319663	-0.351248	-0.554252	-0.277865	0.478314
9.9	-0.0744422	0.0341234	-0.154638	-0.047204	-0.122977	0.152905	-0.201623	0.57235	0.362669	-0.172584	-0.0407743	0.374839	-0.363025	-0.22872	-0.424109	0.149537	-0.312138	-0.285297	-0.231775	-0.661264	-0.674676	1.47432	-0.361549	-0.741972	0.556472	0.0948834	-0.229831	0.634876	-0.283963	-0.0758893	-0.121297	-0.567084	-0.274449	-0.288362	-0.343719	-0.318633	-0.407796	-0.839641	-0.973845	-0.404831	-0.00614086	-0.559175	-0.617831	0.626354
10	-0.0441866	0.0673987	-0.267034	-0.028657	-0.107037	0.15246	-0.571685	0.382471	0.285564	-0.273208	0.0372243	0.364203	-0.342063	-0.30361	-0.324925	0.224583	-0.341027	-0.0515538	-0.392405	-0.357327	-0.551155	1.30792	-0.553315	-0.430335	-0.0243869	-0.470539	-0.301776	0.275419	-0.164475	0.0378177	-0.639505	-0.494	-0.416098	-0.203359	-0.345691	-0.332117	-0.365554	-0.706298	-1.0757	-0.478146	-0.478068	-0.465559	-0.509314	0.655334
10.1	-0.0464462	0.0027285	-0.0955439	-0.138141	0.00280929	-0.0223832	-0.585455	0.526367	-0.0560385	-0.262199	-0.599852	0.118611	-0.368838	-0.273707	-0.322348	-0.0720451	-0.374544	-0.0625513	-0.411839	-0.627043	-0.491036	1.48886	-0.777867	-0.481396	0.023995	-0.22018	-0.205511	0.600449	0.326731	0.0252439	0.157492	-0.234981	-0.796319	-0.19258	-0.275322	-0.149241	-0.418625	-0.734225	-0.936351	-0.435189	-0.222087	-0.622353	-0.363528	0.929299
10.2	-0.0986216	0.0750304	-0.229869	-0.0122579	-0.0825844	0.204809	-0.766128	0.599318	0.412508	-0.0950535	-0.54612	0.544223	-0.417182	-0.18931	-0.302879	0.087264	-0.488536	-0.347907	-0.324729	-0.790595	-0.651357	1.07919	-0.763915	-0.551419	0.186605	-0.2495	-0.283841	0.262574	0.101066	0.0531417	-0.0936766	-0.383745	-0.805594	-0.154392	-0.209203	-0.250176	-0.593237	-0.672817	-0.292489	-0.433631	-0.210234	-0.526316	-0.711558	0.885731
10.3	-0.0921264	-0.0315821	-0.192462	-0.0960669	0.0238179	0.184114	-0.0200644	0.244804	0.0649768	-0.1547	-0.140019	0.144902	-0.347002	-0.117405	-0.244623	0.382029	-0.285883	-0.326716	-0.434487	-0.5001	-0.656886	1.46955	-0.90236	-0.512635	0.264184	-0.130743	-0.248865	0.697707	-0.372502	0.0479084	-0.233981	-0.481929	-0.443853	-0.205672	-0.255413	-0.48202	-0.34656	-0.835123	-0.996738	-0.386392	-0.0762859	-0.649834	-0.373018	0.733979
10.4	-0.0350126	0.0137375	-0.237434	-0.148335	-0.121434	0.127846	-0.262838	0.154102	0.0820705	-0.0591497	-0.434524	0.0937216	-0.3521	-0.229825	-0.413474	0.124721	-0.411332	-0.213977	-0.277088	-0.587662	-0.519569	1.75016	-0.318337	-0.543029	0.264037	0.275236	-0.188904	0.208678	-0.445813	0.00653754	-0.298886	-0.112953	-0.381011	-0.11854	-0.161638	0.0181183	-0.60376	-0.765634	-0.737367	-0.466433	-0.304711	-0.787752	-0.380079	0.631119
10.5	0.0133498	-0.0225186	-0.21983	-0.0335982	0.105321	0.313497	-0.427578	0.208559	0.161104	-0.193065	-0.0750553	0.387993	-0.311804	-0.241101	-0.0695559	0.160594	-0.26746	0.0130379	-0.344442	-0.484415	-0.635715	1.55324	-0.40829	-0.631672	0.224498	-0.276132	-0.226436	0.693519	-0.00803805	0.16117	-0.431898	-0.224828	-0.534609	-0.257475	-0.272078	0.278999	-0.395933	-0.761253	-0.314005	-0.40417	-0.196027	-0.532837	-0.43337	0.620386
10.6	-0.00365601	-0.113895	-0.324747	-0.0781436	0.0230503	0.00134065	-0.270347	-0.238607	0.263704	-0.183719	-0.39156	0.384456	-0.314842	-0.209094	-0.542104	0.101075	-0.35068	-0.0501957	-0.444155	-0.453156	-0.591258	1.5287	-0.261337	-0.469796	0.0920561	0.198542	-0.103139	0.462569	0.0589871	0.17068	-0.353724	-0.587837	-0.415759	-0.49392	-0.218808	0.149047	-0.364654	-0.728829	-0.368931	-0.398045	-0.0302384	-0.648661	-0.249226	0.642506
10.7	-0.0446399	-0.0428684	-0.280744	-0.014833	-0.216107	0.176292	0.270628	0.261548	0.410326	-0.193014	-0.297653	0.417	-0.377005	-0.259306	-0.0931573	0.472672	-0.379325	-0.137847	-0.392505	-0.704608	-0.662003	1.69579	-0.268922	-0.5712	0.365978	-0.0290379	-0.214997	0.338023	-0.237772	0.605277	-0.353015	-0.131166	-0.329538	-0.310677	-0.197016	-0.0756833	-0.519777	-0.929931	-0.379009	-0.311365	-0.231545	-0.62824	-0.256091	0.439787
10.8	-0.0396482	-0.0975526	-0.132826	-0.047446	0.188939	0.273171	-0.349609	0.0126686	0.230283	-0.0200982	0.0431227	0.21699	-0.373766	-0.199296	-0.341302	0.542673	-0.27534	0.0233052	-0.393482	-0.612668	-0.741109	2.0627	-0.275277	-0.473226	0.239955	-0.233535	-0.194167	0.667139	-0.235241	0.321681	-0.247231	-0.360425	-0.66911	-0.232669	-0.372226	0.522584	-0.323858	-0.882895	-0.237494	-0.257768	-0.170713	-0.562208	-0.126515	0.549296
10.9	-0.00904142	0.110712	-0.172529	-0.160329	-0.109759	0.0913032	0.209279	0.493795	0.0347426	-0.160153	0.0861275	0.201994	-0.308346	-0.326643	-0.286813	0.254274	-0.330001	-0.0201	-0.313443	-0.78257	-0.65022	1.49187	-0.381227	-0.528457	0.126878	-0.0951291	-0.311068	0.69725	0.100102	0.0884925	0.0547035	-0.253482	-0.446191	-0.254135	-0.258788	0.24134	-0.34552	-0.802008	-0.470428	-0.350722	-0.185757	-0.564727	0.157156	0.668975
11	0.0748627	0.0659511	-0.188995	-0.0466885	0.061958	0.393208	0.184593	0.436937	-0.00616353	-0.284795	0.114078	0.0134217	-0.325364	-0.236042	-0.655925	0.525656	-0.334228	0.133637	-0.377201	-0.779924	-0.719186	1.48584	-0.259814	-0.472809	0.350023	0.0398914	-0.291876	0.212128	-0.0411178	0.105975	-0.249622	-0.213162	-0.505595	-0.156736	-0.400059	0.193961	-0.304132	-0.821669	-0.145395	-0.371551	0.043196	-0.559767	0.0894807	0.557531
11.1	-0.0851177	0.161107	-0.232805	-0.0542142	0.206132	0.139772	-0.282929	0.506922	-0.0742628	-0.215443	-0.350507	0.0313989	-0.32951	-0.282844	-0.37504	0.228837	-0.36774	0.266271	-0.251796	-0.649604	-0.718079	1.50389	-0.382796	-0.345787	0.160515	-0.393426	-0.390971	0.381569	-0.00148393	0.331362	-0.325446	-0.243738	-0.442875	-0.101635	-0.362778	0.168306	-0.297655	-0.802302	-0.385909	-0.353459	-0.110207	-0.743888	-0.274615	0.360323
11.2	-0.0702276	0.0445212	-0.301264	-0.0201127	0.0463037	-0.0048608	-0.317339	0.448865	-0.0595653	-0.0698388	-0.414436	0.245828	-0.354933	-0.20267	-0.0881873	0.358726	-0.254468	0.155855	-0.317084	-0.499544	-0.712318	1.37189	-0.469617	-0.529416	0.0769386	-0.337127	-0.266305	0.332011	-0.00342543	0.467254	-0.250023	-0.18828	-0.568701	-0.211288	-0.462019	-0.00128002	-0.509544	-0.692977	-0.430276	-0.415908	-0.414858	-0.580709	-0.234733	0.736909
11.3	0.172852	-0.0470624	-0.390357	-0.0826248	0.16039	0.0776185	0.249318	0.278679	0.0550816	-0.204619	-0.166227	0.242786	-0.323705	-0.322392	0.0149639	0.52148	-0.410913	0.0276511	-0.240774	-0.808559	-0.577401	1.41046	-0.300845	-0.501123	0.233754	-0.368624	-0.223568	-0.172924	-0.085112	0.429204	0.123002	-0.332389	-0.693545	-0.421765	-0.405937	0.00415548	-0.615755	-0.788759	-0.418055	-0.344966	0.0775297	-0.832066	-0.0668436	0.276872
11.4	-0.201363	0.110425	-0.248124	-0.0302624	-0.113657	0.300267	-0.557377	0.492948	-0.017443	-0.273648	-0.170314	0.294801	-0.295859	-0.249859	-0.080465	0.343724	-0.373664	-0.146784	-0.308543	-0.685534	-0.695918	1.01688	-0.624885	-0.425457	-0.0446286	-0.249299	0.225447	0.617213	-0.200116	0.0086412	0.387268	-0.403108	-0.640133	-0.278642	-0.285167	-0.141253	-0.691041	-0.783791	-0.363613	-0.431624	-0.0128746	-0.758848	-0.0606747	0.481498
11.5	0.0776173	0.143126	-0.215881	-0.0591931	-0.116505	0.0752492	-0.398478	0.211333	-0.330732	-0.166142	-0.25863	0.0251289	-0.316558	-0.329034	-0.389669	0.276262	-0.286367	-0.456374	-0.354089	-0.621245	-0.68704	1.22406	-0.27668	-0.62397	0.27924	-0.270765	0.19747	0.0189821	-0.574585	-0.0947676	0.264359	-0.149406	-0.504095	-0.271635	-0.264321	-0.14768	-0.467383	-0.74641	-0.497232	-0.298505	-0.19613	-0.747647	-0.525892	0.424165
11.6	0.051564	0.133069	-0.44694	-0.11967	-0.0899732	0.161262	-0.440741	0.435179	0.000214875	-0.238662	-0.0865206	-0.0774647	-0.350853	-0.204365	-0.491306	0.101581	-0.352669	0.128854	-0.287202	-0.754203	-0.634787	1.18333	-0.55938	-0.503117	0.214415	-0.151136	0.192225	0.0678177	-0.0326469	0.288104	0.0277201	-0.283936	-0.68227	-0.365305	-0.320038	0.0317747	-0.441526	-0.77194	-0.556631	-0.396687	0.0395132	-0.806622	-0.239398	0.478006
11.7	0.130377	0.128752	-0.204253	-0.0621925	-0.0407358	-0.0990378	0.102688	-0.0471418	-0.0455208	-0.31974	-0.195706	0.348688	-0.335922	-0.105184	-0.14416	0.515144	-0.350704	0.163319	-0.268307	-0.462491	-0.599533	1.15442	-0.403569	-0.603197	0.364538	0.0370828	0.310993	0.0204597	0.0287516	0.0816615	0.0888702	-0.372612	-0.354806	-0.150571	-0.205031	0.292536	-0.507199	-0.777888	-0.471446	-0.424245	-0.200614	-0.739775	-0.238933	0.543632
11.8	0.00667488	0.226975	-0.145373	-0.077017	0.19645	0.0241864	-0.377388	0.492153	-0.173868	-0.310756	-0.443167	-0.0320847	-0.324615	-0.13488	-0.294844	0.465091	-0.342802	-0.0278141	-0.349469	-0.535353	-0.681158	1.18388	-0.144977	-0.725435	0.151375	0.0805025	0.345776	0.214638	-0.325323	0.0516351	-0.0251416	-0.384203	-0.56361	-0.36006	-0.287738	0.0703515	-0.419252	-0.695263	-0.354145	-0.351985	-0.174876	-0.667903	-0.293082	0.352275
11.9	-0.0675928	0.0181201	-0.228682	-0.195994	-0.122577	0.419979	-0.0949384	0.204807	0.118612	-0.311049	-0.699403	-0.303224	-0.357879	-0.300076	-0.0275554	0.470008	-0.277706	0.615829	-0.345567	-0.665972	-0.666175	1.13193	-0.308753	-0.462189	0.270449	-0.034655	0.0695977	0.0105141	0.122153	0.158544	-0.0392319	-0.346662	-0.575479	-0.185527	-0.310418	-0.182764	-0.30849	-0.695162	-0.203459	-0.33798	-0.361961	-0.658053	0.234219	0.610195
12	-0.0317151	0.179808	-0.0581823	-0.0912276	-0.0019528	0.226267	0.0569159	0.111647	-0.0506791	-0.199491	-0.597027	-0.0338481	-0.321847	-0.190294	-0.178991	0.418045	-0.356637	0.238286	-0.318947	-0.748859	-0.709381	1.14799	-0.301008	-0.442307	0.173328	-0.0525824	0.390138	-0.059811	0.0649451	0.0392426	-0.0417184	-0.225638	-0.372135	-0.309721	-0.496791	0.0999055	-0.571433	-0.66307	-0.415625	-0.38155	0.0570163	-0.77762	-0.381148	0.584261
12.1	0.0388713	0.103692	-0.0737224	-0.155243	0.028601	0.355368	-0.167079	0.502539	-0.0515199	-0.540934	-0.211723	-0.0444777	-0.356936	-0.277463	0.0528826	0.295523	-0.259477	0.200875	-0.291079	-0.694007	-0.604683	0.729608	-0.362424	-0.68363	0.352103	-0.150972	0.37359	0.174678	-0.198317	0.242122	0.0767138	-0.0589152	-0.432956	-0.299153	-0.393221	0.151906	-0.394027	-0.723701	-0.419392	-0.331933	-0.251451	-0.74817	-0.138805	0.499766
12.2	0.00109377	-0.0185289	-0.285089	-0.178166	-0.0870719	0.614563	-0.0437261	0.745695	0.201918	-0.452345	-0.0337554	0.0445267	-0.390708	-0.244542	-0.178735	0.56735	-0.3933	-0.146081	-0.236791	-0.600574	-0.590649	0.791527	-0.332429	-0.433607	-0.114856	0.0343694	0.409412	-0.2248	0.0925874	0.0937387	-0.116619	-0.213858	-0.437651	-0.376799	-0.245127	-0.139874	-0.452169	-0.719394	-0.27425	-0.429776	0.00567499	-0.623156	-0.244353	0.455534
12.3	0.0872828	-0.0521336	-0.243566	-0.112149	-0.0757076	0.271269	0.355751	0.408992	-0.0253334	-0.26276	0.0268552	-0.0326725	-0.310723	-0.294268	-0.247917	0.0970477	-0.122601	-0.296485	-0.399602	-0.699018	-0.563749	0.523458	-0.697796	-0.428207	0.19673	-0.587861	0.295333	0.00926374	0.0118716	0.265364	0.154546	-0.391321	-0.433989	-0.150174	-0.189891	-0.359943	-0.27917	-0.779445	-0.13166	-0.339256	0.159925	-0.270242	-0.0629565	0.827443
12.4	-0.0885589	0.0198943	-0.336292	-0.176587	-0.0586144	0.26251	-0.190293	0.387812	0.153991	-0.152932	-0.053021	0.371497	-0.353025	-0.184209	0.0956095	0.648377	-0.251663	0.0426447	-0.104155	-0.589354	-0.527676	0.775192	-0.133966	-0.65527	0.223231	0.124046	0.091753	-0.0567188	-0.156185	-0.112062	0.0928716	-0.37676	-0.199037	-0.321818	-0.156879	0.0268169	-0.389726	-0.905628	0.00408863	-0.259735	0.288445	-0.408823	-0.324769	0.731109
12.5	-0.00998197	0.0365955	-0.228641	-0.177352	-0.158163	0.231775	-0.630528	0.436177	0.10491	-0.22398	-0.0712478	0.0841898	-0.327813	-0.22593	-0.230764	0.382189	-0.228534	-0.206286	-0.380968	-0.715385	-0.583101	0.339557	-0.263518	-0.598389	0.147125	-0.477019	0.0750382	-0.123871	-0.106581	-0.20989	-0.137661	-0.456855	-0.261909	-0.19726	-0.228559	-0.219469	-0.393618	-0.729378	-0.233076	-0.420186	0.110108	-0.469458	-0.53988	0.645216
12.6	0.0557527	0.0997265	-0.0752401	-0.00845003	-0.0530338	0.384601	-0.44794	0.269747	0.0789676	-0.258849	-0.190315	0.0607282	-0.36301	-0.295966	-0.0442529	0.576711	-0.262949	-0.464428	-0.371836	-0.620946	-0.576117	0.388324	-0.438615	-0.588722	0.26583	-0.202853	-0.0153371	-0.205109	-0.236068	0.142985	-0.00614266	-0.375402	-0.26209	-0.0405764	-0.230069	-0.324405	-0.388141	-0.812033	-0.949834	-0.477989	0.186076	-0.612557	-0.483714	0.611723
12.7	0.0327817	0.0912637	-0.253797	-0.188958	-0.208673	0.234497	-0.26767	0.58278	0.132139	-0.363135	-0.257374	0.406567	-0.34268	-0.157491	-0.320449	-0.0555298	-0.340683	-0.447056	-0.193745	-0.373847	-0.533305	0.606059	-0.335503	-0.261335	0.235532	-0.403466	-0.20097	-0.245431	-0.128612	-0.16929	-0.211368	-0.435445	-0.389931	-0.478867	-0.222674	-0.367923	-0.373689	-0.598623	-0.716619	-0.344812	0.464846	-0.446278	-0.287363	0.291715
12.8	-0.00787332	0.142425	-0.172737	-0.165967	-0.0379503	0.501295	-0.380615	0.655615	-0.198605	-0.409415	0.0268552	0.219798	-0.347016	-0.298222	-0.15231	0.121177	-0.149435	-0.253424	-0.308785	-0.110245	-0.559563	0.314396	-0.11161	-0.730346	0.204377	-0.466721	-0.0842416	-0.166282	0.0317813	-0.242682	0.255574	-0.180037	-0.231982	-0.416799	-0.158593	-0.531768	-0.329963	-0.742113	-0.673893	-0.352368	0.375634	-0.496455	-0.27358	0.466041
12.9	-0.0463968	-0.151232	-0.256327	-0.134826	0.0484881	0.233513	-0.168125	0.781808	-0.227518	-0.363317	-0.0372242	0.215468	-0.355993	-0.175889	-0.112448	0.541598	-0.314993	0.117759	-0.362316	-0.547089	-0.53735	0.340919	-0.520354	-0.535953	-0.130207	-0.160409	-0.236717	0.105579	-0.302879	-0.060187	-0.271482	-0.503784	-0.449037	-0.361429	-0.118825	-0.124873	-0.466937	-0.855049	-0.408026	-0.367978	0.526025	-0.613263	-0.441146	0.594658
13	-0.0182318	-0.0686136	-0.0662948	-0.109788	0.0178649	-0.0990864	0.0455647	0.671026	-0.0400121	-0.294838	-0.313573	0.0980508	-0.354503	-0.196288	-0.404438	0.300114	-0.366121	-0.4011	-0.334971	-0.610518	-0.482836	0.42634	-0.381261	-0.532106	0.137606	-0.390127	-0.250465	-0.130908	-0.142511	-0.218017	0.0160242	-0.322373	-0.316099	-0.235089	-0.0634208	-0.254544	-0.53434	-0.775246	-0.520872	-0.349193	0.709637	-0.617385	-0.532359	0.507444
13.1	0.0229959	0.0656068	-0.154405	-0.139136	-0.125474	0.410368	-0.430572	0.534192	-0.147912	-0.31018	-0.0195819	0.242212	-0.298191	-0.272853	-0.0634887	0.341728	-0.293504	-0.345578	-0.350375	-0.581814	-0.549442	0.238824	-0.629992	-0.61259	0.342645	-0.276548	-0.238426	-0.252979	-0.460687	-0.399775	-0.0642813	-0.232029	-0.338267	-0.451725	-0.180372	-0.212445	-0.509087	-0.697158	-0.758479	-0.391106	0.507609	-0.591186	-0.43806	0.345317
13.2	0.0250294	-0.133094	-0.317954	-0.158661	-0.0789508	0.328745	-0.16577	1.02124	-0.07461	-0.278004	-0.298956	0.119846	-0.318975	-0.209271	-0.24235	0.0130444	-0.226571	-0.108828	-0.332179	-0.452624	-0.590843	0.355929	-0.395748	-0.577379	0.156602	-0.32638	-0.43538	-0.0294392	0.0568848	-0.0147256	0.466337	-0.302803	-0.29979	-0.262749	-0.147082	-0.156907	-0.494459	-0.710781	-0.116294	-0.334695	0.583946	-0.79527	-0.148758	0.419332
13.3	0.0771825	-0.0414665	-0.207738	-0.131394	-0.0266439	0.331266	0.120891	0.676658	-0.151182	-0.34633	0.0560725	0.421811	-0.367092	-0.267702	-0.317537	-0.120018	-0.380546	-0.65184	-0.263817	-0.714593	-0.686605	0.189408	-0.581055	-0.632933	0.0949111	0.0120912	-0.35893	-0.383914	0.0284424	0.413458	-0.140458	-0.462614	-0.288477	-0.246271	-0.147424	-0.657184	-0.338309	-0.697329	-0.653215	-0.393689	0.254549	-0.7473	-0.714624	0.617496
13.4	-0.0581541	-0.0247075	-0.303493	-0.22958	-0.0459457	0.239213	0.0601933	0.614215	-0.374219	-0.146428	-0.368843	0.00803341	-0.351298	-0.254999	-0.416811	0.454114	-0.223705	-0.0987965	-0.406737	-0.613296	-0.604423	0.253247	-0.285214	-0.747665	0.334269	0.31679	-0.491902	-0.211551	-0.303992	-0.152237	-0.310266	-0.454559	-0.227878	-0.326785	-0.173233	-0.564501	-0.605659	-0.71712	-0.6638	-0.384062	-0.123503	-0.623358	-0.574682	0.100125
13.5	0.0139414	-0.161679	-0.208439	-0.0889503	0.0551441	0.353463	-0.340498	0.662563	-0.109995	-0.38117	-0.30641	-0.233419	-0.282507	-0.368614	-0.320963	-0.172604	-0.207828	-0.338042	-0.259674	-0.72006	-0.644067	-0.261192	-0.441381	-0.539936	-0.0682634	-0.258279	-0.46489	-0.0527973	-0.31381	-0.0553204	-0.00882259	-0.526349	-0.515578	-0.500048	-0.343231	-0.235077	-0.571807	-0.683149	-1.07038	-0.4433	0.0948004	-0.801261	-0.237586	0.513394
13.6	0.114979	-0.0503988	-0.210213	-0.210963	-0.0479538	0.21472	-0.3243	0.788421	-0.12353	-0.128599	0.164362	0.28639	-0.358932	-0.234605	-0.0571045	0.198212	-0.392091	0.10458	-0.439173	-0.346624	-0.595487	0.0369805	-0.720557	-0.603749	-0.0541467	-0.091793	-0.519409	0.0629091	-0.321503	-0.256379	-0.0213657	-0.604424	-0.161279	-0.488785	-0.343461	-0.523159	-0.39579	-0.596302	-0.685493	-0.361718	0.244297	-0.749842	-0.416678	0.342304
13.7	0.0646711	-0.0770218	-0.281267	-0.227925	-0.160701	0.400457	0.011591	0.328593	-0.127726	-0.250886	-0.501529	0.428339	-0.338615	-0.211824	-0.294064	0.222458	-0.298222	-0.470069	-0.294993	-0.73859	-0.671842	0.0449224	-0.591722	-0.542329	0.210512	-0.0106155	-0.487445	-0.388007	-0.436785	0.0550751	0.178921	-0.575104	-0.255205	-0.48025	-0.348027	-0.410386	-0.523536	-0.643827	-0.923829	-0.339631	0.273019	-0.932977	-0.226599	0.502799
13.8	0.0529864	-0.147141	-0.136956	-0.184085	0.0114427	0.217207	-0.407595	0.330118	0.0815448	-0.386294	-0.471385	0.267678	-0.35091	-0.172548	-0.502889	0.0553648	-0.353418	-0.559116	-0.38349	-0.928345	-0.582821	-0.054953	-0.750231	-0.658964	0.227902	-0.465637	-0.670137	-0.35244	-0.0678406	-0.0222988	0.0944584	-0.461138	-0.150272	-0.722006	-0.340672	-0.44192	-0.548201	-0.775383	-0.476899	-0.401492	-0.0622251	-0.625609	-0.453489	0.316176
13.9	0.0341549	0.00508875	-0.291941	-0.215575	0.00149886	0.152696	-0.283772	0.352899	0.0584077	-0.407596	-0.568972	0.251887	-0.340929	-0.288678	-0.52711	-0.056735	-0.306329	-0.221066	-0.421465	-0.576269	-0.677924	0.0261579	-0.542393	-0.747796	0.197953	-0.417937	-0.65345	-0.0841706	-0.264627	-0.311375	0.0429155	-0.434612	-0.315369	-0.371085	-0.372057	-0.429966	-0.454116	-0.689638	-0.748306	-0.336582	-0.240601	-1.02141	-0.367301	0.595798
14	0.0685143	0.011835	-0.233517	-0.0793028	-0.168601	0.0632379	-0.141377	0.576649	0.15048	-0.318422	-0.207982	0.697204	-0.386739	-0.42007	-0.20721	0.104319	-0.329343	-0.292084	-0.392786	-0.637405	-0.657322	0.579221	-0.771897	-0.595431	0.223831	-0.233094	-0.564431	-0.519023	-0.235477	0.0484175	0.0116958	-0.506509	-0.163455	-0.347711	-0.401532	-0.0504488	-0.581208	-0.752595	-0.063992	-0.371904	0.354615	-0.698259	-0.238355	0.171185
14.1	0.0369951	-0.0752814	-0.277573	-0.139542	-0.115025	0.240178	0.103638	0.641886	0.062308	-0.44632	-0.379604	0.631041	-0.291658	-0.232574	-0.139633	-0.00498133	-0.331315	-0.0475338	-0.33639	-0.652886	-0.667177	0.545862	-0.474754	-0.570483	0.332881	-0.287035	-0.522757	-0.0219941	-0.230531	-0.149448	-0.206717	-0.469591	-0.106158	-0.186368	-0.251007	-0.354021	-0.523918	-0.795811	-0.778069	-0.349815	0.343267	-0.754312	-0.221079	0.169532
14.2	-0.152276	0.0418081	-0.246553	-0.127157	-0.070446	0.420289	0.0551572	0.702998	0.0745966	-0.346358	-0.244337	0.68417	-0.338418	-0.230075	-0.132229	0.307829	-0.221955	-0.298589	-0.37351	-0.545953	-0.699109	0.402641	-0.559364	-0.558468	0.0821067	-0.0324653	-0.501715	-0.0489896	-0.00437145	-0.0317167	0.0652022	-0.377698	-0.236752	-0.0828207	-0.396095	-0.0139719	-0.301508	-0.622972	-0.581812	-0.334443	-0.03333	-0.775005	-0.0634543	0.0824562
14.3	0.0734187	-0.0166657	-0.223948	-0.138381	0.100913	0.0799838	-0.30157	0.359717	0.0582888	-0.416595	-0.164865	0.453434	-0.303549	-0.142238	-0.285996	0.399385	-0.35132	-0.351666	-0.378782	-0.685511	-0.70289	0.444991	-0.32541	-0.441807	0.189585	-0.236418	-0.486696	0.0712532	-0.293125	-0.262192	-0.152286	-0.508942	-0.371824	-0.364667	-0.295352	-0.150609	-0.50785	-0.627634	-0.493385	-0.386184	0.0787096	-0.746142	-0.0572055	0.435801
14.4	0.0734187	0.00590898	-0.132134	-0.118437	0.161688	0.0814428	-0.434696	0.395362	0.0792597	-0.313097	-0.266004	0.396104	-0.373121	-0.254393	-0.25336	0.563298	-0.33334	0.0535639	-0.315032	-0.52885	-0.792976	0.481745	-0.625101	-0.55334	0.128024	-0.265819	-0.705524	0.0721216	0.0041489	-0.0556842	-0.247593	-0.531005	-0.565132	-0.620683	-0.449415	-0.298287	-0.208531	-0.720138	-0.721573	-0.327008	0.0921285	-0.705796	-0.185841	0.274558
14.5	-0.079597	-0.0133278	-0.194904	-0.123095	-0.0346073	0.139789	0.130525	0.313566	0.0882894	-0.409704	-0.0533324	0.388898	-0.345834	-0.222227	-0.338997	0.119557	-0.282637	-0.263012	-0.315279	-0.700584	-0.719736	0.398993	-0.47126	-0.428681	0.0764897	-0.127988	-0.671554	-0.171476	-0.241518	-0.144094	-0.145052	-0.400849	-0.437899	-0.266239	-0.362519	0.103392	-0.529346	-0.764102	-0.833344	-0.325225	-0.0751827	-0.762588	-0.0563934	0.287799
14.6	-0.09726	0.039676	-0.338108	-0.164061	-0.0499542	0.221667	-0.429396	0.325981	0.0610787	-0.166466	-0.165667	0.581905	-0.392619	-0.2641	-0.598542	0.0328854	-0.377394	-0.264214	-0.331379	-0.409958	-0.705553	0.515745	-0.307617	-0.519613	0.149657	-0.264622	-0.686103	0.18885	-0.137795	-0.107545	-0.294558	-0.455236	-0.313237	-0.512336	-0.372517	-0.322764	-0.379083	-0.670128	-0.675031	-0.358292	-0.328232	-0.722852	-0.501383	0.183874
14.7	0.202853	-0.0185196	-0.178009	-0.170567	-0.167678	0.246497	-0.474313	-0.00900713	0.282391	-0.408439	-0.343729	-0.0871421	-0.414056	-0.282326	-0.198945	0.150337	-0.376949	-0.705483	-0.397558	-0.210827	-0.72008	0.600998	-0.532918	-0.593583	0.208196	-0.350197	-0.704088	0.139705	0.0876422	-0.128993	-0.423252	-0.629386	-0.371782	-0.730071	-0.364189	-0.210468	-0.437673	-0.762217	-0.882075	-0.480701	-0.140008	-0.955449	-0.395425	0.154215
14.8	-0.0724921	0.0328729	-0.190441	-0.119591	0.0576173	0.240583	-0.39172	0.161195	0.125592	-0.407893	-0.412747	0.408834	-0.346681	-0.340863	-0.245384	0.173967	-0.369246	-0.464185	-0.346166	-0.705959	-0.699631	0.738191	-0.431301	-0.594122	0.0827225	-0.599822	-0.523989	-0.307322	-0.398572	-0.199949	-0.262004	-0.68603	-0.338343	-0.54294	-0.439265	-0.403665	-0.558985	-0.717224	-0.815889	-0.421661	-0.0690698	-0.837329	-0.708379	0.152724
14.9	0.0769441	-0.0247201	-0.210698	-0.199948	-0.00909595	-0.205197	-0.483715	0.00999575	0.0746448	-0.337531	-0.374139	0.232755	-0.402638	-0.130533	-0.136274	0.343282	-0.376105	-0.587494	-0.355921	-0.556116	-0.666076	0.742025	-0.48043	-0.632489	0.117115	-0.545085	-0.400496	-0.295969	-0.158317	0.141254	-0.151533	-0.537671	-0.337104	-0.544206	-0.341634	-0.199395	-0.579089	-0.708373	-0.552293	-0.400163	-0.255537	-0.797009	-0.25959	0.279196
15	-0.15151	0.073949	-0.360383	-0.149513	0.176388	0.055935	-0.363094	0.396231	-0.125904	-0.358161	-0.375206	0.304868	-0.342561	-0.209592	-0.539801	0.274193	-0.398804	-0.158752	-0.281651	-0.739472	-0.692295	0.40441	-0.431088	-0.352399	0.277312	-0.241457	-0.413869	-0.191248	-0.0967128	-0.165292	-0.159896	-0.375671	-0.491579	-0.470999	-0.358761	0.0254198	-0.497194	-0.694613	-0.451944	-0.32488	-0.402324	-1.00816	-0.358588	0.372877
15.1	-0.0637991	0.126238	-0.341086	-0.180043	0.10715	0.10357	-0.289053	0.502499	0.357066	-0.292702	-0.0153298	0.230599	-0.37859	-0.196444	-0.167565	0.553141	-0.311708	-0.0516625	-0.443924	-0.771098	-0.655511	1.10221	-0.0583902	-0.726607	0.0825377	-0.0381777	-0.462947	0.261137	-0.0725534	0.11728	-0.234182	-0.561682	-0.351262	-0.254556	-0.42424	0.466514	-0.527584	-0.781744	-0.779022	-0.296838	-0.143864	-0.585092	0.159748	0.181742
15.2	-0.0541134	0.103409	-0.204849	-0.138284	-0.21469	0.459578	-0.133766	0.317168	0.134048	-0.0756453	0.124358	0.325423	-0.268948	-0.142499	-0.0822634	0.229013	-0.415443	-0.0848944	-0.29388	-0.42884	-0.711874	0.76673	-0.417269	-0.555891	0.107307	-0.271929	-0.447357	0.15631	0.153683	0.113975	0.116025	-0.57574	-0.363579	-0.109646	-0.330439	0.601489	-0.33398	-0.733993	-0.219214	-0.374656	-0.0282056	-0.494092	0.843241	0.410164
15.3	0.0135621	-0.0192194	-0.162205	-0.0298657	-0.00967836	0.103393	-0.32788	0.357216	0.406803	-0.17655	-0.0438313	-0.0299294	-0.289442	-0.196944	0.149713	0.808472	-0.403478	-0.0481314	-0.359435	-0.679781	-0.682026	1.1799	-0.384573	-0.454344	0.309609	0.219606	-0.373549	0.0843826	-0.0189204	0.0647115	-0.377725	-0.431035	-0.255574	-0.230881	-0.356517	0.978402	-0.280795	-0.733086	-0.325598	-0.280664	-0.143999	-0.469965	0.421259	0.234983
15.4	-0.0649429	0.00182458	-0.353054	-0.173537	0.125967	0.267867	-0.432135	0.485849	0.214815	-0.149823	0.0466579	0.207356	-0.385749	-0.229692	-0.149639	0.51132	-0.384851	0.0867892	-0.341828	-0.555083	-0.706493	0.658583	-0.623764	-0.531975	0.242997	0.134333	-0.472077	-0.0255177	0.056452	0.182959	-0.304712	-0.518456	-0.310353	-0.151484	-0.433912	0.672686	-0.162082	-0.750732	-0.50394	-0.329579	-0.21777	-0.468555	0.358203	0.17971
15.5	0.0645713	0.0591777	-0.107389	-0.153762	-0.0847674	0.184665	-0.322607	0.448054	0.178065	-0.169115	0.16786	0.232046	-0.348443	-0.287251	-0.302674	0.806519	-0.352472	0.0910184	-0.430896	-0.725571	-0.702876	0.59077	-0.428561	-0.456494	0.191983	-0.343086	-0.66013	0.345636	0.243712	0.0536708	-0.20255	-0.406234	-0.278897	-0.110194	-0.406635	0.721263	-0.246452	-0.775458	-0.379596	-0.346675	-0.236929	-0.806526	0.425137	0.486826
15.6	-0.0107101	-0.0332547	-0.127672	-0.182453	0.0611852	0.23745	-0.699827	0.378278	0.30017	-0.207824	-0.0530195	0.155831	-0.33115	-0.309312	-0.411153	0.188669	-0.527713	0.00988706	-0.307228	-0.582686	-0.642517	0.422768	-0.611473	-0.590831	0.362588	-0.376977	-0.681342	0.0125032	-0.112017	0.114758	-0.0200764	-0.587469	-0.388439	-0.400962	-0.515896	0.334275	-0.305463	-0.810705	-0.457365	-0.375605	-0.134143	-0.514804	0.262275	0.173458
15.7	0.00339812	0.033832	-0.326081	-0.202956	-0.00719454	-0.24312	-0.538506	0.500591	-0.00143978	-0.187681	-0.182729	-0.012589	-0.342275	-0.186984	-0.486584	0.565663	-0.284343	-0.0606771	-0.360412	-0.71924	-0.701789	0.724481	-0.188799	-0.578778	0.168615	0.187366	-0.633433	-0.213978	-0.0721218	-0.0124601	-0.331736	-0.607882	-0.619383	-0.249854	-0.47595	0.340927	-0.409668	-0.787657	-0.442999	-0.314101	-0.0945793	-0.722204	0.20341	0.243446
15.8	-0.0379116	0.0354212	-0.285568	-0.197767	-0.0734285	0.260364	-0.404475	0.434283	0.110902	-0.404194	-0.387079	-0.0810171	-0.370969	-0.262307	-0.0565296	0.202461	-0.316028	-0.0583254	-0.481742	-0.660733	-0.759262	0.299258	-0.310837	-0.759556	0.29927	-0.233816	-0.634311	-0.241724	-0.279278	0.0453332	0.0154717	-0.564734	-0.467514	-0.248807	-0.498021	0.0819945	-0.430941	-0.697475	-0.970363	-0.414095	-0.0239705	-0.57098	0.0722604	0.135493
15.9	-0.104027	0.0318815	-0.0358966	-0.122317	-0.147984	0.121362	-0.356181	0.412167	0.0808841	-0.179503	-0.318712	-0.194699	-0.376844	-0.294548	-0.399206	0.431771	-0.357317	-0.112277	-0.38752	-0.553972	-0.775046	0.400035	-0.325004	-0.623825	0.0758798	-0.150862	-0.756116	-0.25424	-0.229609	-0.0989322	-0.0604134	-0.47492	-0.111171	-0.547541	-0.500686	-0.0433128	-0.242759	-0.735765	-0.737871	-0.447606	0.124798	-0.825385	0.26715	0.342475
16	0.0548364	-0.0233727	-0.281091	-0.170724	-0.0986883	0.135153	-0.267553	0.198321	-0.0827234	-0.191208	-0.365434	-0.0850024	-0.349766	-0.338128	-0.322788	0.57295	-0.361434	0.0938503	-0.353808	-0.773941	-0.728013	0.133975	-0.733858	-0.5931	0.30616	0.00504593	-0.722171	-0.220657	-0.339146	0.0268298	-0.372224	-0.705978	-0.417187	-0.552335	-0.521085	-0.0680277	-0.437777	-0.702752	-1.00745	-0.376872	-0.402453	-0.957276	-0.0148487	0.30808
16.1	-0.0028975	-0.0583056	-0.187863	-0.172221	-0.00945568	0.120211	-0.517903	0.381831	-0.0887301	-0.419769	-0.48988	-0.296242	-0.357109	-0.290328	-0.475603	0.239975	-0.377685	-0.493668	-0.468188	-0.569973	-0.736279	0.173855	-0.553144	-0.578524	0.0394922	-0.0920182	-0.703088	-0.0896782	-0.367788	-0.0796368	-0.0136299	-0.697214	-0.467982	-0.609314	-0.457647	-0.157859	-0.378979	-0.770243	-1.00778	-0.433845	-0.148688	-0.711659	-0.0508097	-0.0115315
16.2	-0.088616	-0.000870452	-0.261131	-0.0840085	-0.0248672	0.24403	-0.672256	0.378356	0.0503166	-0.308741	-0.33181	-0.320223	-0.366015	-0.296725	-0.073119	0.526778	-0.269325	-0.145725	-0.486092	-0.879832	-0.69493	0.0230084	-0.598123	-0.488956	0.357725	0.00157091	-0.611834	-0.0470004	-0.319744	0.132871	-0.0399686	-0.632707	-0.701709	-0.232909	-0.558177	0.0800614	-0.345478	-0.76892	-1.07639	-0.354909	-0.447898	-0.94599	0.186453	0.437533
16.3	0.265016	0.0252089	-0.0694793	-0.0575645	-0.0393646	-0.0670384	-0.949244	0.182372	0.0524259	-0.336138	-0.274445	-0.133122	-0.354379	-0.238135	0.00192979	0.386156	-0.173783	-0.0402	-0.393702	-0.707601	-0.787475	0.273409	-0.690248	-0.5417	0.390624	-0.185941	-0.485019	0.294525	0.0187349	-0.170784	-0.502965	-0.636222	-0.277581	-0.511907	-0.579559	0.166734	-0.566094	-0.795726	-0.928115	-0.452272	-0.336999	-0.890192	0.14968	0.160793
16.4	0.42214	0.0694651	-0.196049	-0.0799454	-0.0436544	-0.0600317	-0.322271	0.0785851	0.0442279	-0.286958	-0.43671	-0.224561	-0.333547	-0.291356	-0.143344	0.252884	-0.351492	-0.231096	-0.387071	-0.670963	-0.715785	0.386628	-0.449433	-0.643622	0.229162	-0.196658	-0.384854	0.134584	0.0176838	-0.0743294	-0.271429	-0.695731	-0.628729	-0.452972	-0.507471	-0.0429522	-0.472111	-0.834124	-0.57439	-0.389689	-0.251586	-0.855859	0.0935039	0.34229
16.5	0.462396	0.0558235	-0.265129	-0.0768217	-0.101872	-0.0839853	-0.667393	0.0603515	-0.0163224	-0.427404	-0.244488	-0.233905	-0.423289	-0.1955	-0.267462	0.356203	-0.223893	0.0953334	-0.460699	-0.811377	-0.770787	0.22176	-0.715873	-0.776057	0.384239	0.103417	-0.512147	0.0183001	-0.214254	-0.00682879	-0.0710962	-0.573854	-0.474746	-0.449766	-0.425209	0.0385353	-0.448422	-0.795159	-0.736458	-0.378761	-0.165309	-0.77839	0.0302914	0.174293
16.6	0.269354	0.0373162	-0.316206	-0.0866127	-0.0795759	0.0676554	-0.66733	-0.237426	-0.223584	-0.311078	-0.307914	-0.483205	-0.387627	-0.240843	-0.152005	0.294309	-0.328059	-0.0972456	-0.303482	-0.736598	-0.745929	0.113646	-0.680043	-0.570165	0.146732	0.0158042	-0.253981	-0.296508	-0.171051	0.0498545	-0.282985	-0.65252	-0.508829	-0.428637	-0.439842	-0.118177	-0.52494	-0.699415	-1.09716	-0.496981	-0.27042	-0.908745	-0.242489	0.212271
16.7	0.351248	0.0961895	-0.296392	-0.192071	-0.0133613	0.149144	-0.247054	-0.162471	-0.163067	-0.379091	-0.56469	-0.446604	-0.349955	-0.0792751	-0.214594	0.0829712	-0.267099	-0.28462	-0.434462	-0.976534	-0.726928	0.470296	-0.718981	-0.649551	0.239166	0.0516137	-0.296904	-0.0671299	-0.296666	-0.0835298	-0.0419947	-0.534052	-0.860384	-0.454216	-0.489399	-0.00215439	-0.484627	-0.729995	-0.909193	-0.331462	-0.350362	-1.14753	-0.340992	0.143012
16.8	0.168706	0.0159648	-0.221339	-0.116223	-0.033311	-0.153011	-0.236513	-0.0878669	-0.00964727	-0.28798	-0.784716	0.0558298	-0.381952	-0.256949	-0.124029	0.635361	-0.350616	-0.0233595	-0.439791	-0.777804	-0.714263	0.2589	-0.316302	-0.599034	0.222847	0.00198505	-0.20997	-0.0347814	-0.576835	-0.0760123	-0.194464	-0.48343	-0.692875	-0.547183	-0.335814	-0.295468	-0.645307	-0.807847	-0.916411	-0.422832	-0.306793	-0.699581	-0.359155	0.261059
16.9	0.22862	-0.0948347	-0.211573	-0.136574	-0.154084	0.25778	-0.310105	0.103029	-0.286637	-0.463274	-0.353365	-0.378569	-0.372822	-0.287228	-0.0401013	0.439069	-0.457823	-0.194641	-0.364947	-0.710834	-0.717486	0.164181	-0.614692	-0.538176	0.138379	0.118248	-0.33879	-0.0410898	0.0866386	-0.0325339	-0.150183	-0.51521	-0.485297	-0.343823	-0.509792	-0.166927	-0.689125	-0.682126	-0.931401	-0.514906	-0.197616	-0.927518	-0.492093	0.34507
17	0.0186982	-0.116683	-0.178678	-0.0541267	-0.119238	-0.0370048	-0.0923756	0.0773011	-0.1654	-0.408656	-0.72288	-0.233552	-0.369045	-0.304028	-0.0925652	0.198823	-0.342947	-0.162268	-0.327577	-0.656985	-0.769247	0.249924	-0.657281	-0.716861	0.207623	0.168698	-0.311654	-0.127127	-0.467149	0.0446571	-0.403576	-0.573104	-0.587576	-0.463748	-0.548908	-0.305349	-0.427223	-0.755762	-0.838636	-0.373389	-0.19315	-0.948886	-0.212394	0.192673
17.1	0.235348	0.00939076	-0.337805	-0.108248	-0.149779	-0.0510769	-0.585957	-0.115332	0.0682518	-0.240414	-0.61182	-0.379819	-0.403618	-0.35933	-0.348307	0.0668992	-0.296341	0.235115	-0.288292	-0.938973	-0.733878	0.305747	-0.594941	-0.843999	0.166317	-0.348506	-0.318204	-0.180831	-0.250715	-0.0523792	-0.505764	-0.544085	-0.553973	-0.395119	-0.352845	-0.385171	-0.482492	-0.713534	-0.781355	-0.39877	-0.592775	-0.71363	-0.339213	0.336097
17.2	0.145339	-0.00572486	-0.238687	-0.150454	-0.213727	-0.223412	-0.310567	-0.265282	-0.13508	-0.407159	-0.755693	-0.342695	-0.382393	-0.263605	0.0441616	0.159781	-0.298537	-0.084657	-0.383409	-1.19148	-0.617263	0.643675	-0.493446	-0.683959	0.0887892	-0.186219	-0.0909299	-0.24856	-0.590381	0.018674	-0.798108	-0.638588	-0.3921	-0.616476	-0.429326	-0.487742	-0.708011	-0.64617	-0.964482	-0.368142	-0.206195	-0.692241	-0.62634	0.351899
17.3	0.102537	-0.0617939	-0.23951	-0.107168	-0.205051	-0.228648	-0.493342	-0.104959	0.010841	-0.400481	-0.492307	-0.211275	-0.436242	-0.260967	-0.537453	0.186934	-0.214846	-0.332591	-0.426502	-0.773489	-0.625192	0.0896449	-0.549532	-0.75549	0.258941	-0.25413	-0.0172029	-0.0239833	-0.346446	-0.202731	0.0472439	-0.689014	-0.389545	-0.827835	-0.297469	-0.437946	-0.718425	-0.646535	-0.80138	-0.467341	-0.697293	-0.693746	-0.519296	0.460708
17.4	0.0834407	-0.093916	-0.328189	-0.0880742	-0.40546	-0.0203056	-0.880437	-0.27293	-0.294452	-0.357566	-0.915575	-0.38635	-0.379091	-0.29967	0.0785256	0.148089	-0.29359	-0.113617	-0.498869	-0.696659	-0.639493	0.530972	-0.428433	-0.793276	0.232047	-0.331122	-0.000811274	-0.317226	-0.438571	-0.106859	-0.255382	-0.95483	-0.343583	-0.429003	-0.358603	-0.431911	-0.726436	-0.813292	-0.657565	-0.449869	-0.457383	-0.577308	-0.534127	0.454247
17.5	0.105964	-0.0845129	-0.192958	-0.0912198	-0.112525	0.288875	-0.627051	0.281611	-0.0634934	-0.480607	-0.63947	-0.33939	-0.391836	-0.200049	-0.194102	0.161824	-0.36132	-0.243568	-0.510302	-0.556094	-0.72507	0.548809	-0.434477	-0.571729	0.244927	0.123592	0.038557	-0.0583425	-0.860313	-0.400678	-0.104126	-0.474626	-0.42803	-0.453058	-0.346739	-0.520045	-0.620704	-0.718719	-1.06339	-0.392031	-0.730621	-0.9349	-0.946277	0.386559
17.6	0.175588	-0.054944	-0.421823	-0.0712083	-0.127573	0.224515	-0.397535	-0.189192	-0.277245	-0.344646	-0.957558	-0.445454	-0.379881	-0.334438	-0.152739	0.309315	-0.350902	-0.292537	-0.304847	-1.03062	-0.595917	-0.0768471	-0.771198	-0.666032	-0.0280648	-0.0612775	0.10265	-0.039669	-0.483306	-0.0571982	-0.169468	-0.719086	-0.479576	-0.434496	-0.445061	-0.422712	-0.774913	-0.704874	-0.584678	-0.392483	-0.642659	-0.552591	-0.826882	0.469395
17.7	0.10316	-0.154665	-0.311616	-0.199109	-0.136386	0.0358289	-0.313042	-0.165599	-0.00791758	-0.37563	-0.645029	-0.528455	-0.423716	-0.341524	-0.0161044	0.490784	-0.375856	-0.296213	-0.5237	-0.748188	-0.608599	0.466859	-0.700282	-0.551324	0.202464	4.48943e-06	0.38434	0.135821	-0.468621	-0.139975	-0.101385	-0.572196	-0.575476	-0.534096	-0.34813	-0.346733	-0.506085	-0.761102	-0.560551	-0.523108	-0.784189	-0.612713	-0.625228	0.214938
17.8	0.168515	-0.0756812	-0.230641	-0.173883	-0.169124	0.347076	-0.344117	-0.201813	-0.0141786	-0.285831	-0.366814	-0.67022	-0.371079	-0.368328	-0.287742	2.02284	-0.37352	-0.354904	-0.370805	-0.879474	-0.539535	-0.0195273	-0.39354	-0.660001	0.257686	-0.05549	0.402707	-0.29479	-0.555493	-0.125339	0.480828	-0.405628	-0.399709	-0.199761	-0.300191	-0.380839	-0.424207	-0.800443	-1.04719	-0.363532	-0.323286	-0.636425	-0.240995	0.28743
17.9	0.10619	-0.0558359	-0.250364	-0.198804	0.0151942	0.242993	-0.358614	-0.0635747	-0.178366	-0.232352	-0.503822	-0.561755	-0.362794	-0.291545	0.134787	2.14723	-0.418301	0.137659	-0.263714	-1.11121	-0.391919	0.264364	-0.340476	-0.61872	0.0355555	-0.0971603	0.493785	-0.0156289	-0.413162	-0.0961822	-0.117546	-0.362416	-0.421132	-0.612435	-0.19933	-0.139583	-0.50763	-0.805199	-0.844479	-0.439795	-0.684127	-0.454352	-0.623209	0.450292
18	0.175863	-0.0986733	-0.234791	-0.194495	0.138912	0.114648	-0.635486	-0.100381	-0.193116	-0.224456	-0.334243	-0.37865	-0.30571	-0.398307	0.0347636	3.19799	-0.399652	0.402554	-0.339642	-1.00057	-0.422509	0.189534	-0.777727	-0.64416	0.170856	0.410584	0.385206	0.161976	-0.187342	-0.0412369	0.287331	-0.463094	-0.308128	-0.422483	-0.293523	-0.239918	-0.377201	-0.707798	-0.652128	-0.412267	-0.530382	-0.440646	-0.703848	0.421901
18.1	0.0109377	-0.0776306	-0.442424	-0.170398	0.0812078	0.123974	-0.134379	0.00604139	0.0332673	-0.142618	-0.517231	-0.248236	-0.361343	-0.331531	0.389589	2.76642	-0.265819	0.393251	-0.354657	-0.926867	-0.56923	0.138462	-0.202965	-0.703971	-0.0726911	0.418782	0.431316	0.523298	-0.407322	-0.289086	0.408929	-0.304214	-0.384914	-0.527559	-0.254088	-0.591598	-0.43228	-0.697358	-0.892502	-0.352798	-0.3536	-0.547131	-0.474223	0.333629
18.2	0.0248738	-0.019964	-0.308203	-0.14334	-0.162121	0.219373	-0.238103	-0.201476	0.0488349	-0.313106	-0.618681	-0.230727	-0.399922	-0.294432	0.0660759	2.62856	-0.322229	0.71801	-0.583284	-0.781596	-0.616303	0.0488723	-0.514352	-0.544202	0.0400874	0.16056	0.587371	-0.0444998	-0.436171	0.073663	0.343141	-0.202936	-0.556975	-0.493992	-0.183472	-0.268701	-0.443225	-0.74347	-0.773674	-0.372457	-0.870536	-0.635094	-0.3092	0.495413
18.3	-0.0831813	-0.164176	-0.327719	-0.113717	-0.283894	0.14634	-0.199977	-0.292445	-0.202648	-0.122084	-0.349456	-0.237512	-0.324877	-0.271401	0.197393	2.50685	-0.256786	0.374237	-0.394425	-0.617325	-0.605757	-0.185782	-0.230299	-0.377576	0.123012	-0.137735	0.46359	-0.196554	-0.0119334	0.131219	0.16756	-0.326026	-0.375546	-0.523367	-0.357868	-0.0395719	-0.511855	-0.817667	-0.737315	-0.478539	-0.568435	-0.665975	-0.341915	0.161628
18.4	0.0437408	-0.267572	-0.152947	-0.263462	0.00986679	-0.100894	-0.42884	-0.314153	-0.175336	-0.457007	-0.349668	-0.263975	-0.313871	-0.282064	0.214902	2.12177	-0.353365	0.427368	-0.396847	-0.889514	-0.596284	0.30633	-0.178189	-0.512733	0.228819	-0.349354	0.23957	-0.10657	-0.418297	-0.0669245	0.148855	-0.510751	-0.671497	-0.48453	-0.388594	0.0096	-0.652382	-0.801598	-0.542537	-0.344721	-0.725865	-0.775937	-0.123462	0.425879
18.5	0.00327676	-0.185917	-0.283863	-0.24676	-0.0600651	0.103039	-0.295811	0.0251541	0.0175892	-0.28159	-0.231145	-0.0826845	-0.292227	-0.209814	0.183649	2.73862	-0.313477	0.504372	-0.30442	-0.718164	-0.562213	0.520832	-0.255675	-0.461622	0.208089	-0.0320845	0.248782	-0.213486	-0.216112	-0.21964	-0.214712	-0.2677	-0.669612	-0.260331	-0.320593	0.164149	-0.382845	-0.757952	-1.04928	-0.240927	-0.26328	-0.840249	-0.066153	0.316672
18.6	0.0637625	-0.266028	-0.259591	-0.15312	-0.0888277	0.233485	-0.507428	-0.25805	0.039453	-0.205115	-0.293138	-0.169571	-0.350114	-0.286505	0.0122722	1.79232	-0.264467	0.494152	-0.379179	-0.59541	-0.555117	0.519279	-0.0086818	-0.756546	0.299222	0.100135	0.0723627	-0.148699	-0.311564	-0.223345	0.290712	-0.425719	-0.644702	-0.439796	-0.404435	0.0954391	-0.459416	-0.627803	-0.682338	-0.430439	-0.657693	-0.516972	-0.0368789	0.35981
18.7	0.0106191	-0.176589	-0.108872	-0.160094	-0.120968	-0.135832	-0.74653	0.132639	0.141511	-0.326894	-0.493286	-0.283653	-0.344583	-0.203654	-0.136699	1.59841	-0.25575	0.112885	-0.324463	-0.920087	-0.626729	0.0591047	-0.351316	-0.606272	0.373551	-0.0295615	0.0386874	-0.08474	0.0250417	-0.0686883	0.238435	-0.361667	-0.450786	-0.460847	-0.366861	-0.128874	-0.498352	-0.684867	-0.576348	-0.295926	-0.777366	-0.598375	-0.65523	0.515744
18.8	0.0741681	-0.226367	-0.381958	-0.0974583	-0.15075	0.00815362	-0.0593939	-0.0738882	-0.297356	-0.437063	-0.0839175	-0.358206	-0.334954	-0.203917	-0.0377746	1.65794	-0.296002	-0.190881	-0.458967	-0.893177	-0.687657	0.217626	-0.36809	-0.502284	0.195889	0.0926789	0.0527957	-0.126206	-0.482418	-0.126192	0.214107	-0.179226	-0.603751	-0.288842	-0.419674	-0.299631	-0.457139	-0.814753	-0.785636	-0.336598	-0.316252	-0.705079	0.122373	0.406527
18.9	0.0375855	-0.130071	-0.370961	-0.181537	-0.146682	0.291071	-0.253327	-0.379436	0.00933058	-0.19059	-0.0395662	-0.217958	-0.368392	-0.165215	-0.310355	1.24345	-0.482568	0.057817	-0.220982	-0.670653	-0.653367	0.220512	-0.56352	-0.474468	0.262781	0.336044	-0.0837885	-0.0550138	0.211934	-0.0829133	0.517973	-0.381001	-0.624683	-0.29584	-0.353892	-0.0395719	-0.3112	-0.74356	-0.693057	-0.306716	-0.449358	-0.61502	-0.284274	0.432545
19	0.00567365	-0.114489	-0.374869	-0.145157	0.0546067	0.0562803	-0.371199	0.0874257	-0.0587843	-0.226026	-0.706473	-0.277157	-0.389939	-0.381855	-0.134224	1.27954	-0.411199	0.293316	-0.334833	-0.763426	-0.576014	0.329371	-0.500469	-0.749148	0.300328	-0.0930559	-0.103624	-0.11029	-0.498904	0.113681	0.781153	-0.117432	-0.492618	-0.268551	-0.426319	0.0874318	-0.351452	-0.86826	-0.48555	-0.4991	-0.40385	-0.493258	-0.386421	0.525106
19.1	0.123272	-0.118273	-0.203044	-0.183998	-0.0233466	-0.104671	-0.0995076	-0.220382	-0.192299	-0.215669	-0.419884	-0.308961	-0.381908	-0.32826	-0.0920829	1.18381	-0.331284	0.0980078	-0.346225	-0.743615	-0.56849	0.509955	-0.583417	-0.602427	0.00129878	0.288499	0.11599	-0.0916185	-0.170832	-0.0325967	0.605205	-0.0997689	-0.446895	-0.303947	-0.380023	-0.121873	-0.502111	-0.692503	-0.428575	-0.420244	-0.653178	-0.402906	-0.0420624	0.729885
19.2	0.0932148	-0.146058	-0.300249	-0.203292	0.0626223	0.0615131	-0.483787	0.0421425	-0.22905	-0.370216	-0.309176	-0.280126	-0.371886	-0.314224	0.0700103	1.40789	-0.389457	-0.143327	-0.225669	-0.70001	-0.576779	0.247138	-0.45909	-0.601759	0.273486	-0.185027	0.078213	-0.434705	-0.0622709	-0.139776	-0.0731223	-0.301258	-0.683692	-0.155884	-0.252844	-0.121791	-0.42107	-0.606888	-0.386701	-0.44222	-0.528732	-0.453601	-0.214225	0.499914
19.3	0.12003	-0.0714748	-0.357412	-0.144766	-0.106928	0.153874	-0.498521	-0.106034	0.0468687	-0.192688	-0.154987	-0.358719	-0.365797	-0.256207	-0.0370447	1.25929	-0.400406	0.0698074	-0.235466	-0.893391	-0.735474	0.283405	-0.553235	-0.411586	0.386582	0.451192	0.0251713	-0.272569	-0.259018	-0.0861005	-0.0041074	-0.323359	-0.658584	-0.199847	-0.495504	-0.0480997	-0.520055	-0.671655	-0.0940442	-0.449712	-0.786994	-0.780057	-0.56487	0.465652
19.4	0.0344603	-0.118889	-0.207598	-0.0231128	-0.221022	-0.15944	-0.296408	-0.248613	-0.182064	-0.35332	-0.570742	-0.474495	-0.358525	-0.268963	0.103671	0.958256	-0.346877	0.105833	-0.309436	-0.9805	-0.733332	0.49629	-0.365598	-0.626967	0.224358	0.267781	-0.016534	-0.484692	-0.33461	-0.0623227	0.372999	-0.435133	-0.520914	-0.271576	-0.468357	-0.100411	-0.47938	-0.733169	-0.681857	-0.366735	-0.644627	-0.559754	-0.0816994	0.652982
19.5	0.0555885	-0.144018	-0.21917	-0.0804251	-0.0413179	0.0669294	-0.359262	-0.00265819	-0.00208293	-0.351053	-0.530941	-0.50764	-0.367349	-0.298899	0.271913	0.932548	-0.500126	0.0209149	-0.385949	-1.05369	-0.686475	0.432289	-0.348137	-0.580757	0.320413	-0.093412	0.113684	-0.0801053	-0.104042	-0.219589	0.154557	-0.453376	-0.520392	-0.173222	-0.420924	-0.0427269	-0.299415	-0.78139	-0.423454	-0.381219	-0.818106	-0.804215	0.180138	0.70219
19.6	0.0224252	-0.165364	-0.173603	-0.143177	0.0652733	0.331476	0.0680273	0.195205	-0.219811	-0.302477	-0.446949	0.0655689	-0.371974	-0.30208	0.09724	0.829073	-0.318926	0.114038	-0.288066	-0.539207	-0.602659	0.672807	-0.577531	-0.726093	0.338564	-0.131165	0.0782143	-0.403099	-0.190379	0.0109067	0.621404	-0.462695	-0.487605	-0.296791	-0.451889	-0.0742713	-0.500353	-0.641531	-0.226758	-0.369769	-0.206289	-0.907916	0.0676681	0.536335
19.7	-0.00420214	-0.100474	-0.0672895	-0.0127211	0.135878	-0.0542101	0.118875	-0.338217	-0.232246	-0.378266	-0.192217	-0.18119	-0.381632	-0.329102	0.200385	1.05085	-0.331312	0.303628	-0.277249	-0.925788	-0.524197	0.820928	-0.248304	-0.524309	0.121825	0.0340362	0.132879	-0.0163677	-0.0637159	0.483613	0.180411	-0.407765	-0.323803	-0.0197483	-0.331755	-0.187596	-0.467781	-0.697705	-0.526693	-0.406168	-0.573117	-0.627233	-0.0203023	0.929832
19.8	0.0159252	-0.18164	-0.348319	0.0947538	0.00865057	0.0365345	0.0633109	0.0181241	-0.0615961	-0.366255	0.0803469	-0.325511	-0.42958	-0.294729	-0.229013	0.910646	-0.501776	-0.0625334	-0.441239	-0.598608	-0.430966	0.528501	-0.456525	-0.76492	0.406826	-0.0358451	0.0764105	-0.0237559	0.00785259	0.182834	0.144372	-0.258379	-0.423377	-0.197473	-0.0361119	0.0846429	-0.42617	-0.675381	-0.109535	-0.348736	-0.976413	-0.361593	-0.0531315	1.00725
19.9	-0.0193338	-0.172728	-0.266662	0.0903556	-0.169674	0.0963494	-0.0608328	-0.0776361	-0.281187	-0.41662	-0.0367766	-0.260952	-0.387641	-0.300252	-0.0428386	0.523663	-0.331446	0.243142	-0.414525	-1.07148	-0.584343	0.272023	-0.819615	-0.500807	0.658871	-0.0534935	0.142226	-0.13764	-0.0176837	0.115003	-0.0490859	-0.375149	-0.456795	-0.263028	-0.292243	0.0490696	-0.521473	-0.708642	-0.264435	-0.490608	-0.66954	-0.235178	-0.301622	0.961581
20	0.0464268	-0.17251	-0.0266171	0.115464	-0.278672	0.240622	-0.0570757	-0.3824	-0.0444213	-0.485261	0.441328	-0.273703	-0.390018	-0.444283	0.246275	0.422525	-0.395788	0.548553	-0.421099	-1.22734	-0.323637	0.543576	-0.525036	-0.717991	1.81393	0.0258961	0.177133	-0.347736	-0.152511	0.176275	0.20163	-0.216109	-0.277012	-0.29538	-0.34363	0.357511	0.370749	-0.705846	-0.0826313	-0.44753	-0.452361	-0.158856	-0.241104	1.60395
20.1	-0.0338689	-0.188316	0.218993	0.326369	0.0966625	0.196842	-0.147577	0.313201	-0.310035	0.474511	0.45571	-0.0470249	-0.293382	0.0815609	0.342089	0.612407	-0.383222	0.379428	-0.325053	-0.649612	-0.390486	0.468034	-0.553727	-0.87141	3.36864	-0.0805539	0.326984	-1.14779	-0.445908	0.0536517	-0.129235	-0.0230685	-0.394103	-0.23946	-0.329345	0.631639	0.97826	-0.592276	-0.13643	-0.434567	-0.239533	0.562858	-0.24846	1.58497
20.2	-0.0133498	-0.207884	0.648612	0.503801	0.164934	0.00791842	-0.191518	0.146843	-0.124147	1.87447	1.3194	0.766782	-0.309212	0.0710361	0.747295	0.625112	-0.557479	-0.219973	-0.18411	-1.19881	-0.358074	0.804751	-0.716412	-0.606001	4.02207	-0.340626	0.393626	-0.778379	-0.0768742	0.31978	0.242484	0.3471	-0.304806	-0.228155	-0.285699	0.821868	1.37998	-0.782679	0.410262	-0.44623	0.302302	1.18458	-0.26533	1.72336
20.3	0.0966266	-0.0735819	0.521352	0.506221	0.0172419	0.0378281	0.052919	0.346772	-0.513364	2.60498	1.54684	0.989111	-0.128768	0.454734	0.589633	0.641962	-0.544885	0.611975	0.103394	-0.853765	-0.330745	1.05731	-0.492449	-0.725467	4.93362	-0.19394	0.350248	-0.777268	-0.284861	-0.0624887	0.116789	0.511279	0.0943673	-0.0563221	-0.505812	1.02031	1.24113	-0.804811	0.477653	-0.388272	0.357818	1.85487	-0.415588	2.02424
20.4	0.0365635	-0.274737	0.522817	0.484577	-0.199652	0.128987	0.283742	0.104953	-0.539379	2.73518	1.70233	0.71898	-0.0786374	1.04836	0.820063	0.748304	-0.61811	0.686596	-0.19538	-0.901369	-0.255364	0.977377	-0.379408	-0.752848	5.12551	-0.428632	0.198689	-1.2067	-0.123569	0.0389018	0.290789	0.509152	0.110726	-0.000768429	-0.321198	0.991113	1.31237	-0.844557	0.213093	-0.382006	0.396694	2.30113	-0.108904	1.98033
20.5	-0.0357431	-0.0862509	0.356233	0.431252	-0.0765475	0.245782	0.352086	-0.0975265	-0.427883	2.38705	1.28957	0.194297	-0.0420861	1.28868	0.462011	0.656801	-0.742561	0.342751	-0.12603	-1.10652	-0.36816	1.02435	-0.241244	-0.846578	4.98855	-0.410907	0.141579	-1.02335	-0.0963443	0.0784037	0.175975	0.504362	-0.139349	0.0387004	-0.305487	1.06012	1.05167	-0.728495	0.199636	-0.366865	0.313749	1.76505	-0.275825	1.82547
20.6	0.17562	-0.0640402	0.196572	0.282672	-0.0941993	0.0167776	-0.0675476	-0.163714	-0.351812	2.31346	1.18307	0.392014	-0.0411349	1.40274	0.577604	0.569045	-0.632324	0.519128	-0.117535	-0.944572	-0.405207	0.876358	-0.357437	-0.79698	4.75564	-0.7044	0.109466	-0.536314	-0.258325	-0.342093	0.174173	0.337909	-0.226888	-0.11994	-0.364576	0.848452	0.851304	-0.788852	0.112138	-0.248565	0.281223	1.57895	-0.534648	1.56534
20.7	0.0166391	-0.105545	0.282649	0.293447	-0.396617	-0.015484	-0.172244	0.0430454	-0.167508	1.87677	1.26944	0.371254	-0.132379	1.14512	0.215838	0.642733	-0.684237	0.0503588	-0.184912	-0.779238	-0.496916	0.417666	-0.550293	-0.739824	4.41733	-0.377541	0.172351	-0.673943	-0.0983457	0.104408	0.220245	0.242158	-0.564797	-0.0501353	-0.339726	0.742442	0.831109	-0.804749	-0.0252532	-0.37223	0.00554794	1.36224	-0.798387	1.54005
20.8	0.123475	-0.0561287	0.0734951	0.316293	-0.0577332	0.459888	0.020624	0.107178	-0.208147	1.85459	0.6711	0.114883	-0.106395	1.13565	0.292574	0.513913	-0.6337	0.52875	-0.241174	-0.707581	-0.574206	0.390167	-0.443917	-0.74606	3.90827	-0.223322	0.00373432	-1.13547	-0.652705	0.0444956	0.383885	0.193757	-0.514043	-0.137612	-0.44697	0.687388	0.586624	-0.715191	-0.294391	-0.302695	-0.0629543	1.31067	-0.732025	1.40341
20.9	0.0480086	-0.137735	0.0500687	0.362582	-0.163357	0.168384	0.107621	-0.0710685	-0.244835	1.46959	0.654585	0.454977	-0.114406	0.853599	0.228327	0.523538	-0.453288	0.377298	-0.0924484	-0.866423	-0.542974	0.805976	-0.387656	-0.757492	3.39855	-0.0620949	-0.00494796	-1.11768	0.299047	0.00411024	0.132577	0.167007	-0.333094	-0.23739	-0.319955	0.58932	0.505391	-0.686947	-0.145237	-0.284668	-0.198196	1.28924	-0.820429	1.41763
21	0.133091	-0.26609	0.0933914	0.277507	-0.111245	0.184548	-0.204003	-0.409875	0.197863	1.31632	0.738388	0.818958	-0.128396	0.838066	0.430196	0.724124	-0.485089	0.53546	-0.086822	-0.726034	-0.619507	0.876081	-0.614463	-0.740332	3.07636	-0.373955	0.204195	-0.465898	-0.165791	-0.124481	0.420039	0.244136	-0.460138	-0.167062	-0.449578	0.754613	0.287004	-0.717219	-0.0636484	-0.35761	-0.481225	1.06408	-0.213091	1.68038
21.1	0.140219	-0.162838	0.241304	0.128222	-0.2332	0.307821	0.100394	-0.117785	-0.171741	0.949478	0.372321	1.72901	-0.151995	0.51127	0.558973	0.745969	-0.531654	0.0151022	-0.131659	-0.915236	-0.576311	0.943621	-0.615429	-0.694901	3.01451	0.0403198	0.276772	-0.411661	0.0673182	-0.260265	0.787102	0.305344	-0.356611	-0.0638639	-0.432015	0.746441	0.418174	-0.789654	0.0816005	-0.266484	-0.151455	0.955242	-0.350383	1.17291
21.2	0.0684767	-0.143699	0.0681296	0.123172	-0.284323	0.454351	-0.324644	-0.422141	-0.313681	0.983352	0.525853	1.59009	-0.132592	0.489549	0.853055	0.366819	-0.446196	-0.0574953	-0.27728	-0.830962	-0.761363	0.930214	-0.335419	-0.742623	2.44021	-0.112012	0.183691	-0.452229	-0.210704	0.0697334	0.703282	0.0909249	-0.400532	-0.0869297	-0.493127	0.462206	0.442573	-0.71986	-0.236706	-0.4094	-0.384379	0.812685	-0.472902	1.14823
21.3	0.0201434	-0.179989	0.0470944	0.0420242	-0.0830441	0.412609	0.0290974	-0.315751	-0.0106217	0.75311	0.39071	1.34611	-0.117806	0.293857	0.201325	0.692452	-0.565246	0.504988	-0.453966	-0.913531	-0.677143	1.25225	-0.699718	-0.508519	2.31288	-0.215305	0.226917	-0.368858	0.258554	-0.278663	0.232199	-0.156612	-0.577606	-0.404077	-0.340312	0.481609	0.103735	-0.748807	-0.256184	-0.376003	-0.750704	0.377877	-0.394781	1.1746
21.4	0.0432038	-0.120244	0.0317093	0.250966	-0.157824	0.215606	-0.0303764	0.0448428	-0.187678	0.678614	0.383276	1.33377	-0.205632	0.416132	0.106076	0.867623	-0.461743	-0.052586	-0.273933	-0.941951	-0.690792	0.948578	-0.487548	-0.64109	2.09735	-0.262073	0.0640829	-0.650616	-0.254093	-0.148391	0.797308	0.0167989	-0.630179	-0.295371	-0.484376	0.412398	-0.185887	-0.585496	-0.20967	-0.304715	-0.206148	0.0895252	-0.334205	1.11447
21.5	-0.0024424	-0.233203	-0.113413	0.176737	-0.43068	0.253193	0.067068	-0.527843	-0.202736	0.46401	0.0607613	0.70829	-0.155514	0.245329	0.382197	0.525688	-0.453206	0.358939	-0.435194	-0.781875	-0.773469	1.11083	-0.718999	-0.398749	1.74608	-0.19427	-0.111961	-0.808072	-0.510354	-0.254909	0.285073	-0.218721	-0.543182	-0.264433	-0.472288	0.248554	-0.261181	-0.766294	-0.631031	-0.450817	-0.529784	0.115924	-0.434154	0.738674
21.6	-0.0123485	-0.116797	0.0303234	0.108171	-0.109456	0.217271	-0.52647	-0.0893029	-0.101756	0.499997	-0.0239831	0.67848	-0.182294	0.187291	-0.16904	0.267852	-0.491331	0.093526	-0.318738	-0.823632	-0.745143	1.11166	-0.413283	-0.824154	1.54946	-0.186475	-0.224072	-0.364584	0.00939838	-0.103786	0.0646496	-0.352003	-0.455822	-0.23179	-0.547121	0.0464965	-0.201475	-0.607172	-0.358323	-0.26621	-0.300981	-0.0164184	-0.313271	0.680397
21.7	-0.0299629	-0.143598	-0.311979	0.0705824	-0.215469	0.297949	-0.417194	-0.423128	-0.270606	0.382958	-0.33476	0.69654	-0.256113	0.0517472	0.195805	0.618501	-0.469322	0.273538	-0.299733	-0.846754	-0.690895	1.13559	-0.623372	-0.661688	1.49307	-0.094693	-0.229307	-0.64016	-0.000766687	-0.207895	0.289167	-0.329918	-0.425487	-0.310547	-0.434126	0.218542	-0.251193	-0.64586	-0.568368	-0.303977	-0.850962	-0.12713	-0.432922	0.500797
21.8	-0.0818521	-0.175332	-0.173513	0.126857	-0.256753	-0.0761394	-0.200361	-0.0717338	-0.190992	0.27038	-0.284718	0.115044	-0.232838	0.105287	-0.25994	-0.062616	-0.533859	-0.038679	-0.196426	-0.703764	-0.763837	1.26775	-0.610258	-0.706077	1.35859	-0.137571	-0.190821	-0.231218	-0.458451	-0.26348	-0.282979	-0.34648	-0.562157	-0.192582	-0.527338	-0.0786035	-0.517493	-0.655832	-0.569085	-0.252468	-0.447709	-0.194857	-0.485644	0.477136
21.9	-0.0156382	-0.154468	-0.199416	0.161569	-0.0673912	-0.0737961	-0.181959	-0.0159639	-0.108674	0.169381	-0.0302866	0.345663	-0.246489	0.00962991	-0.0702061	0.273954	-0.482326	-0.189157	-0.344025	-0.64519	-0.78896	1.24381	-0.351349	-0.692417	1.08611	-0.42994	-0.309888	-0.640653	-0.503697	-0.184042	0.525915	-0.272266	-0.796182	-0.437988	-0.537267	-0.0913733	-0.484301	-0.729318	-0.703201	-0.402632	-0.531075	-0.328217	-0.320899	0.639889
22	0.00637148	-0.239499	-0.262165	0.0547348	-0.136838	0.0159544	-0.499167	-0.51624	-0.168139	0.0518961	-0.374884	-0.175891	-0.309383	0.0906774	-0.00107667	0.29935	-0.318673	-0.152082	-0.329798	-0.787428	-0.822877	1.20644	-0.701208	-0.704967	0.91985	-0.224797	-0.519085	-0.370553	-0.350517	-0.390884	-0.0653864	-0.331094	-0.386518	-0.461773	-0.552827	0.168104	-0.454265	-0.659713	-0.685282	-0.41328	-0.398485	-0.391622	-0.596544	0.335778
22.1	-0.0523403	-0.119146	-0.286904	0.0297811	-0.243284	0.0531784	0.396603	-0.293353	0.0265972	0.0789648	-0.0516618	-0.0399712	-0.299558	-0.0660229	-0.159472	0.0461489	-0.370871	-0.0206976	-0.456522	-0.654009	-0.878171	1.3062	-0.710002	-0.426161	0.788296	0.065221	-0.389928	-0.394117	-0.75839	-0.0996862	0.0454942	-0.491716	-0.457674	-0.386704	-0.607134	-0.223736	-0.460449	-0.695968	-0.585791	-0.374808	-0.483543	-0.324683	-0.710215	0.325848
22.2	0.0708887	-0.0393573	-0.212063	-0.0146932	-0.137364	0.16939	-0.415939	-0.219631	0.25339	-0.0199	0.0333452	-0.31622	-0.291692	-0.187354	0.0439791	0.349003	-0.383847	0.843255	-0.395654	-0.631381	-0.816222	1.06382	-0.452546	-0.684124	0.607864	-0.0753371	-0.440751	-0.402845	-0.41889	0.00708773	0.199671	-0.336748	-0.619916	-0.1463	-0.475448	0.0820702	-0.504341	-0.600507	-0.803825	-0.396052	-0.367002	-0.364344	-0.293526	0.42243
22.3	0.176977	-0.16439	-0.249281	0.06116	-0.269966	0.222639	-0.441266	0.0411974	0.416101	0.0714058	-0.205448	-0.204825	-0.287716	-0.0445094	-0.0960005	0.23207	-0.423395	0.231596	-0.37346	-1.02137	-0.807707	1.31396	-0.583222	-0.964482	0.723945	-0.00262769	-0.528479	-0.384329	-0.514416	-0.173899	0.193778	-0.364412	-0.314959	-0.107555	-0.592999	-0.157103	-0.629104	-0.6192	-0.605059	-0.451718	-0.508927	-0.514781	-0.0704117	0.542553
22.4	0.482342	-0.125417	-0.244429	-0.0365477	-0.114616	0.339145	-0.576272	-0.498487	0.594078	-0.218635	-0.121678	0.101854	-0.16636	-0.204044	-0.0863629	0.300932	-0.366489	0.304134	-0.383087	-0.797249	-0.736182	1.61498	-0.719056	-0.534876	0.798902	0.553366	-0.173675	-0.00276769	-0.406857	-0.516824	0.359859	-0.397352	-0.19955	-0.161362	-0.57872	0.688053	-0.670819	-0.670659	-0.312491	-0.401026	-0.822214	-0.638853	0.0743252	0.538634
22.5	0.562318	-0.106528	-0.210465	-0.00110276	-0.0480052	0.0877964	0.168822	0.087139	0.461214	-0.156735	0.286043	0.127828	-0.300868	-0.239535	0.0556897	0.0996971	-0.401522	0.465518	-0.275914	-0.681522	-0.80625	1.78754	-0.575078	-0.767379	0.643813	-0.145234	-0.37689	-0.287339	-0.483939	-0.163612	0.131683	-0.391605	-0.290673	-0.280903	-0.448366	1.22167	-0.550916	-0.705316	-0.822891	-0.405289	-0.751106	-0.572036	0.460837	0.589811
22.6	0.559903	-0.111717	-0.271825	-0.00227235	-0.102546	-0.119417	-0.0346931	0.167094	0.474089	-0.135653	0.0562273	0.324544	-0.293874	-0.0824978	0.110565	0.363839	-0.492935	0.0499242	-0.258755	-0.354533	-0.780029	1.64225	-0.669594	-0.444646	0.589676	0.131022	-0.331482	-0.16228	-0.276203	0.106124	0.316444	-0.446832	-0.426053	-0.0852184	-0.505567	1.19597	-0.373958	-0.772053	-0.407167	-0.412555	-0.774029	-0.487035	0.26591	0.641644
22.7	0.415047	-0.142681	-0.249584	0.0802059	-0.0809733	0.514861	-0.367512	0.0572272	0.376349	-0.260809	-0.173953	-0.123279	-0.253994	-0.158616	-0.247051	0.168489	-0.450198	0.592428	-0.414254	-0.738146	-0.767101	1.59194	-0.496431	-0.608965	0.363481	-0.0398438	-0.287038	-0.480985	-0.687783	0.238989	0.104997	-0.0944541	-0.161925	-0.371401	-0.449913	1.35408	-0.601257	-0.606532	-0.675221	-0.422282	-0.484789	-0.357833	0.67083	0.450383
22.8	0.445807	-0.134928	-0.338732	-0.0481617	-0.214859	0.221006	-0.0916401	-0.0277903	0.463609	-0.3192	0.0272655	0.00602506	-0.266841	-0.0402467	0.0527777	0.211587	-0.401387	-0.177421	-0.278687	-0.718907	-0.802758	1.52568	-0.47275	-0.743987	0.754148	-0.229696	-0.353675	-0.60077	-0.426824	-0.0124278	0.235582	-0.106826	-0.427764	-0.211247	-0.505666	1.28282	-0.332792	-0.65968	-0.352327	-0.351207	-0.543395	-0.648145	0.16112	0.349658
22.9	0.300316	-0.209294	-0.269448	-0.0356237	-0.307074	0.46573	-0.448504	-0.185859	0.349622	-0.180275	-0.159057	0.235033	-0.311595	-0.221928	-0.553143	0.354662	-0.101102	-0.0708119	-0.537333	-1.12586	-0.754347	1.33324	-0.541504	-0.711546	0.551459	-0.260239	-0.233553	-0.296779	-0.457566	0.0644778	0.0678729	-0.270163	-0.294818	-0.33709	-0.396336	1.06524	-0.676199	-0.630824	-0.275778	-0.361087	-0.374598	-0.694847	0.228759	0.554774
23	0.421646	-0.152278	-0.310058	-0.0162888	-0.0818721	0.355648	-0.382898	0.0590803	0.443277	-0.299468	-0.170226	-0.0529682	-0.321573	-0.215883	-0.324817	0.192934	-0.227911	0.217178	-0.343947	-0.613337	-0.716243	1.82368	-0.618132	-0.643582	0.494538	0.108541	-0.445876	-0.353131	-0.677497	0.007379	0.409698	-0.398847	-0.607981	-0.135924	-0.354419	0.990324	-0.496783	-0.670717	-0.542736	-0.422558	-0.614226	-0.568223	0.205581	0.400286
23.1	0.427141	-0.162392	-0.147092	-0.00763098	-0.0460024	0.263134	-0.543379	0.0966961	0.403299	-0.284288	0.00663922	0.0356116	-0.313001	-0.285379	-0.223898	0.284357	-0.355944	0.0775932	-0.341556	-0.972047	-0.772449	1.52983	-0.124821	-0.559514	0.388156	-0.0382253	-0.377413	-0.20818	-0.695793	-0.271696	0.583424	-0.182669	-0.419718	-0.360104	-0.513442	1.23616	-0.60114	-0.742991	-0.936229	-0.387676	-0.800231	-0.766988	0.279643	0.460028
23.2	0.244108	-0.154559	-0.288006	-0.0818902	-0.181109	0.0909473	-0.110223	-0.195863	0.173281	-0.320868	-0.25284	0.0457023	-0.318545	-0.118206	-0.0913128	0.441117	-0.358211	0.0255325	-0.251459	-0.858773	-0.762165	1.5479	-0.530061	-0.757487	0.496176	0.0888864	-0.29701	-0.137433	-0.298547	-0.015826	0.117043	-0.389751	-0.449759	-0.12769	-0.330748	1.22877	-0.616491	-0.644421	-0.428519	-0.375144	-0.618009	-0.731208	0.404181	0.378119
23.3	0.350617	-0.149126	-0.0585756	-0.0104511	-0.257234	0.362762	-0.370359	-0.340673	0.411217	-0.401769	-0.132271	-0.296165	-0.313466	-0.27541	0.409703	0.211491	-0.08513	0.275596	-0.415658	-1.08767	-0.775693	1.79797	-0.543109	-0.864742	0.439295	-0.257158	-0.348326	-0.737409	-0.300551	0.102428	0.379079	-0.486675	-0.520578	-0.310859	-0.414599	1.10466	-0.49824	-0.777879	-0.558827	-0.338921	-0.3433	-0.988886	0.447052	0.477091
23.4	0.103711	-0.136836	-0.307939	0.0393696	-0.0620871	0.23414	-0.126878	-0.146746	0.373337	-0.379523	-0.339403	-0.058042	-0.329664	-0.179423	-0.134586	0.300257	-0.298721	0.403427	-0.494276	-0.866738	-0.772442	2.19585	-0.277532	-0.476179	0.292202	-0.225686	-0.301626	-0.0483644	-0.381994	0.142388	0.119464	-0.26862	-0.642221	-0.177404	-0.372923	1.23484	-0.680732	-0.747763	-0.887853	-0.497871	-0.470488	-0.799853	0.047462	0.518263
23.5	0.292256	-0.115327	-0.339747	-0.0896829	-0.276315	0.14348	-0.231732	-0.0678842	0.425826	-0.365695	-0.176571	-0.179017	-0.365673	-0.118556	-0.0371815	0.479616	-0.357911	0.341496	-0.259846	-0.648624	-0.673974	1.9488	-0.522798	-0.584912	0.348103	0.146047	-0.300543	-0.259724	-0.675099	-0.00501641	0.609817	-0.24476	-0.447979	-0.341998	-0.526797	1.0884	-0.724125	-0.643684	-0.699058	-0.346448	-0.826375	-0.730287	0.448131	0.552728
23.6	0.212996	-0.170088	-0.335263	-0.047761	0.0783043	0.204276	-0.174724	-0.292281	0.200032	-0.207438	-0.20635	0.127454	-0.34386	-0.137522	0.137905	0.192478	-0.227054	0.0226533	-0.43446	-0.857447	-0.792053	1.96372	-0.604096	-0.728449	0.0478479	-0.0930731	-0.268919	-0.252054	-0.631073	-0.00478986	0.391288	-0.370992	-0.42233	-0.286221	-0.459521	0.846636	-0.54242	-0.714926	-0.748917	-0.406077	-0.865558	-0.762498	0.39562	0.431792
23.7	0.257256	-0.141108	-0.395743	0.0138777	-0.0861936	0.35845	-0.486014	-0.270209	-0.0916184	-0.29493	-0.46703	-0.118659	-0.359778	-0.138199	-0.0981415	0.463897	-0.0694657	-0.0478598	-0.304747	-0.49123	-0.717015	2.01194	-0.239664	-0.530061	0.321319	-0.317903	-0.255131	0.0337017	-0.383159	-0.094307	0.495176	-0.484663	-0.602018	-0.0536947	-0.34352	0.476423	-0.468043	-0.61342	-0.677694	-0.458967	-0.557418	-0.735003	-0.0377968	0.651001
23.8	0.290916	-0.0659514	-0.331988	-0.0260138	-0.115256	0.319476	-0.575739	0.073819	0.127604	-0.284099	-0.136326	0.0395793	-0.329619	-0.252067	0.157439	0.260338	-0.116837	0.0873504	-0.477941	-0.935261	-0.694109	1.61967	-0.429015	-0.575938	0.305427	-0.0545879	-0.212428	-0.0455796	-0.661491	-0.0612854	0.812009	-0.59059	-0.768896	-0.525532	-0.335015	0.518652	-0.442333	-0.662772	-1.13681	-0.350504	-0.455798	-0.715109	0.39837	0.233691
23.9	0.272961	-0.129889	-0.238866	-0.0415529	-0.293516	0.178232	-0.301085	-0.0956167	0.136779	-0.247355	-0.439393	-0.146115	-0.322212	-0.283812	-0.14254	0.23983	-0.0594221	0.00972409	-0.257279	-0.75243	-0.707343	1.24276	-0.259459	-0.529327	0.438667	0.0091874	-0.330887	0.0399533	-0.852863	0.0917163	0.793456	-0.278822	-0.511101	-0.314283	-0.278606	0.523156	-0.590638	-0.762191	-0.569815	-0.378527	-0.484311	-0.832792	-0.0512417	0.409381
24	0.35738	-0.108091	-0.318874	0.0137141	-0.25743	0.360671	-0.212185	-0.0596101	-0.0381087	-0.414082	-0.147998	-0.300097	-0.328272	-0.141339	-0.408578	0.0570314	-0.159069	0.0859559	-0.486848	-0.776176	-0.754967	1.65406	-0.209984	-0.615432	0.361406	-0.217641	-0.267989	-0.0213121	-0.42592	0.229468	1.30346	-0.446796	-0.652648	-0.305959	-0.393696	0.582052	-0.67115	-0.691996	-0.68924	-0.359621	-0.510855	-0.902332	0.178922	0.515083
24.1	0.301208	-0.208054	-0.125397	-0.0194476	0.0615796	0.0112112	-0.820879	-0.167556	0.0302849	-0.270901	-0.551642	-0.142558	-0.371867	-0.0806401	-0.278138	-0.0137198	-0.0812946	0.0768001	-0.416875	-0.76078	-0.720534	1.73799	-0.416635	-0.431135	0.194003	-0.119448	-0.432601	-0.308834	-0.425679	0.0964515	1.82788	-0.418371	-0.432742	-0.259571	-0.36911	0.550727	-0.615098	-0.704286	-0.901477	-0.432019	-0.733186	-0.800442	-0.0291035	0.381397
24.2	0.168317	-0.227454	-0.180818	-0.0965917	-0.185151	0.292596	-0.444054	-0.300098	0.0759762	-0.180364	-0.646656	0.0785913	-0.309949	-0.213125	-0.0786378	0.245024	-0.142653	-0.261266	-0.259986	-0.872873	-0.83047	1.34293	-0.056193	-0.632735	0.448912	-0.070991	-0.472344	-0.388715	-0.603606	-0.0924629	1.73073	-0.31057	-0.636454	-0.321327	-0.438489	0.72099	-0.695964	-0.685506	-0.569617	-0.463622	-0.659556	-0.82429	0.207804	0.48368
24.3	0.192994	-0.183598	-0.300387	-0.0636078	-0.255275	0.159927	-0.576031	-0.44947	0.0134964	-0.465457	-0.150236	-0.313327	-0.337973	-0.134732	-0.0501878	-0.141922	-0.211074	-0.0873498	-0.482663	-1.06899	-0.728616	1.28486	-0.112016	-0.545284	0.225858	-0.000439371	-0.482144	-0.116447	-0.42534	0.148704	1.32343	-0.56195	-0.738788	-0.380843	-0.397708	0.511373	-0.597994	-0.672229	-1.15485	-0.372154	-0.684724	-0.937845	0.143587	0.292546
24.4	0.230132	-0.116634	-0.0870187	-0.0479316	-0.103319	0.123138	-0.304342	0.185247	0.183288	-0.224669	-0.465428	-0.0502672	-0.418957	-0.202121	-0.460158	0.16638	-0.243093	0.19085	-0.303087	-0.869592	-0.782406	1.35209	-0.187095	-0.615175	0.393618	-0.147667	-0.491571	-0.147015	-0.286618	-0.040745	0.736356	-0.379565	-0.480655	-0.683855	-0.505522	0.481858	-0.655927	-0.719391	-0.958622	-0.440286	-0.680119	-0.985328	0.173721	0.481992
24.5	0.0211527	-0.292239	-0.244091	-0.156475	-0.0348323	0.345586	-0.446159	0.292276	0.109826	-0.283793	-0.849724	0.0258637	-0.315144	-0.205413	-0.0463492	0.246248	-0.319569	0.0961597	-0.318005	-0.880754	-0.757422	1.14528	-0.490336	-0.597432	0.189933	-0.165639	-0.407429	-0.216324	-0.102122	-0.158566	1.22775	-0.527242	-0.566665	-0.422104	-0.523196	0.321025	-0.809788	-0.766038	-0.854043	-0.406081	-0.912604	-0.894956	-0.0748317	0.393455
24.6	0.0585978	-0.176643	-0.31441	-0.144335	0.184311	0.205833	-0.0465239	-0.246242	0.0154698	-0.0149587	-0.398519	0.480474	-0.343383	-0.225288	-0.196321	0.221293	-0.105949	-0.137391	-0.467221	-0.85497	-0.721575	1.39741	-0.291564	-0.474907	0.164808	-0.193649	-0.564302	-0.386427	0.115018	0.137656	1.12189	-0.115318	-0.507324	-0.262669	-0.466972	0.42005	-0.659884	-0.670153	-0.792617	-0.436904	-0.635741	-0.694221	0.0810514	0.260725
24.7	0.146817	-0.127359	-0.105028	-0.0778453	0.0269908	0.334783	-0.952352	0.17851	0.0944663	-0.33505	-0.345075	0.564588	-0.322637	-0.0964155	-0.0868	0.237196	-0.163157	0.553992	-0.544899	-0.841427	-0.745919	1.46731	-0.226594	-0.692233	0.383124	0.218972	-0.291696	-0.207454	0.260425	0.0338071	1.04846	-0.200873	-0.496092	-0.116232	-0.408563	0.688399	-0.765497	-0.741795	-0.750737	-0.409713	-0.498689	-0.611562	-0.0851243	0.231829
24.8	0.201851	-0.206379	-0.133336	0.0281559	-0.26848	0.471207	0.0947505	0.150472	0.13385	-0.133485	-0.417799	0.821022	-0.32585	-0.16984	-0.355718	0.092616	-0.23083	0.314292	-0.417485	-0.546767	-0.715358	1.37196	-0.0620236	-0.542332	0.34679	-0.272535	-0.394427	0.261821	-0.00155813	0.119308	0.688628	-0.145664	-0.383433	-0.140164	-0.436589	0.186429	-0.258177	-0.895929	-0.705705	-0.349919	-0.617307	-0.537422	0.421006	0.735772
24.9	0.200099	-0.175865	-0.215099	0.0453146	0.0360422	0.408417	-0.149957	0.0341246	0.112664	-0.160892	-0.184706	0.917327	-0.323301	-0.233712	-0.283939	0.0568816	-0.266916	0.397192	-0.420554	-0.613223	-0.721997	1.49156	-0.258429	-0.489034	0.139701	-0.506437	-0.398728	0.0469437	0.190714	0.317921	1.06218	-0.252946	-0.399442	-0.397279	-0.274061	0.261319	-0.491841	-0.845386	-0.65811	-0.345361	-0.623771	-0.846346	0.0694489	0.406881
25	0.116986	-0.209485	-0.184706	0.0387637	-0.213844	0.339431	-0.236233	-0.177858	-0.009696	-0.11335	-0.377048	0.783419	-0.327865	-0.14987	0.270907	0.616169	-0.169011	0.364409	-0.406849	-0.789789	-0.815172	1.77798	-0.20507	-0.548949	0.211708	-0.159446	-0.449142	-0.4917	0.141701	0.256667	0.604113	-0.340078	-0.435989	-0.464901	-0.46442	0.453013	-0.46903	-0.789249	-0.857903	-0.397602	-0.484449	-0.829793	-0.134949	0.49559
25.1	0.0622341	-0.0612089	-0.250344	0.0372663	-0.0494136	0.1636	-0.0514001	-0.024019	0.0651323	-0.294875	-0.452447	0.770445	-0.346953	-0.219528	0.159768	0.185193	-0.294194	-0.14389	-0.497761	-0.687705	-0.794907	1.70157	-0.323671	-0.699933	0.155445	0.0630498	-0.540193	-0.242546	0.142084	0.686241	0.6726	-0.582551	-0.477177	-0.179412	-0.507159	0.584571	-0.544767	-0.815151	-0.561959	-0.359559	-0.61605	-0.693913	-0.00955719	0.734183
25.2	0.0819129	-0.141835	-0.273344	-0.0154417	-0.165871	0.279031	-0.269803	-0.473837	0.0656573	-0.253714	-0.274259	0.977124	-0.353382	-0.292588	0.292548	0.589702	-0.410103	-0.122299	-0.457428	-0.880028	-0.768522	1.74555	-0.356247	-0.538113	0.0779567	-0.00158042	-0.52603	-0.0384187	0.173335	0.573985	0.685962	-0.432823	-0.643985	-0.377111	-0.432844	0.654794	-0.585716	-0.795685	-0.783504	-0.36663	-1.05	-0.795296	-0.426117	0.345507
25.3	0.0410061	-0.194391	-0.222804	-0.0998908	-0.197299	0.0122304	-0.129958	-0.241272	0.0654034	-0.122845	-0.385919	1.36278	-0.373693	-0.202893	0.13783	0.378735	-0.310952	-0.103734	-0.489009	-0.908132	-0.790663	1.53943	-0.707738	-0.651962	0.319779	0.147845	-0.580059	-0.0811385	0.247298	0.455088	0.449519	-0.499004	-0.372816	-0.436259	-0.500452	0.706282	-0.4801	-0.743333	-0.473372	-0.458307	-0.620706	-0.890774	-0.491098	0.223846
25.4	0.0150033	-0.0634322	-0.336249	0.0388105	-0.108239	-0.0912589	-0.337458	-0.119103	0.117616	-0.279752	-0.315829	1.49637	-0.334988	-0.128829	0.37791	0.140781	-0.335707	0.0945566	-0.399228	-1.06788	-0.83422	1.80304	-0.448086	-0.386416	0.249948	-0.384677	-0.396039	-0.00247216	-0.0508871	0.394507	0.691571	-0.479167	-0.462585	-0.256095	-0.513369	0.511078	-0.381715	-0.614468	-0.907139	-0.385698	-0.618676	-0.933643	-0.527048	0.302737
25.5	0.027479	-0.0575353	-0.214412	-0.0440963	-0.108639	0.426682	-0.0628313	-0.253085	-0.0680518	-0.255454	-0.220178	1.33238	-0.315626	-0.217109	0.321065	0.405598	-0.361298	0.524599	-0.358951	-1.08526	-0.736383	1.3851	-0.469949	-0.666501	0.32174	-0.2156	-0.591061	-0.207708	0.0522475	0.332513	0.677939	-0.427846	-0.606067	-0.407772	-0.430304	0.495081	-0.427153	-0.762594	-0.763328	-0.322042	-0.548813	-0.882354	-0.289939	0.599121
25.6	-0.00764577	-0.0966269	-0.306105	-0.0129075	-0.0116826	0.175964	-0.424327	-0.315651	-0.212391	-0.309507	-0.27448	0.775087	-0.312531	-0.266999	0.338431	0.303507	-0.341535	0.0901345	-0.276165	-1.14032	-0.768707	1.49657	-0.493578	-0.676703	0.241996	-0.313022	-0.604754	-0.102719	-0.105485	0.49932	-0.104573	-0.384463	-0.538386	-0.243593	-0.470241	0.415748	-0.66403	-0.740929	-0.781048	-0.284366	-0.335756	-0.916496	-0.289531	0.206926
25.7	-0.0174475	-0.0744765	-0.251309	-0.0813619	-0.0565192	0.175462	-0.135632	-0.176296	-0.108188	-0.308704	-0.762675	0.993981	-0.376919	-0.258231	0.0346724	0.0898775	-0.290657	-0.0250979	-0.398257	-0.987352	-0.619501	1.7092	-0.641992	-0.710394	0.309151	0.0552067	-0.598555	-0.106736	0.117108	0.727517	0.14523	-0.339426	-0.762189	-0.437314	-0.415868	0.648189	-0.604584	-0.767574	-1.0775	-0.40334	-0.600938	-0.998405	-0.680742	0.422816
25.8	-0.0378878	-0.0614263	-0.382046	-0.0158161	0.0554778	0.173672	0.148058	-0.430985	-0.0867984	-0.265103	-0.456106	1.26349	-0.346993	-0.301456	-0.205491	0.171487	-0.258434	0.101978	-0.103257	-0.911294	-0.642458	1.38785	-0.354998	-0.504835	0.191356	-0.00120435	-0.544635	0.169144	-0.0528039	0.859827	0.164613	-0.331565	-0.546234	-0.644924	-0.341002	0.541905	-0.649708	-0.737086	-0.980553	-0.428986	-0.805637	-0.770243	-0.640287	0.186866
25.9	-0.00315539	-0.155882	-0.468149	0.0539004	0.028729	-0.0906823	0.00180661	-0.407558	0.00226565	-0.213712	-0.408309	1.13834	-0.349189	-0.0905049	0.216625	0.323809	-0.427984	-0.227657	-0.323369	-1.28604	-0.771622	1.30604	-0.482703	-0.569266	0.220671	0.0225639	-0.569813	-0.090113	0.216667	1.07628	-0.0622552	-0.431698	-0.624879	-0.347306	-0.482916	0.258948	-0.514583	-0.823922	-0.944813	-0.442662	-0.712624	-0.855937	-0.427819	0.448573
26	0.135621	-0.174613	-0.307767	-0.0156557	-0.118211	0.152052	-0.0941438	-0.468907	0.00565194	-0.208244	-0.463671	0.925176	-0.310805	-0.349743	0.197986	0.345794	-0.276462	0.578886	-0.42726	-1.01038	-0.709538	1.3435	-0.601928	-0.503612	0.286791	-0.295562	-0.517652	-0.0548433	-0.293574	0.770098	0.0523091	-0.504159	-0.578413	-0.468413	-0.411731	0.22878	-0.694041	-0.818788	-0.697508	-0.410081	-0.766895	-0.845226	-0.742005	0.185274
26.1	0.152054	-0.129847	-0.312136	-0.0664427	0.273868	-0.166708	-0.257067	-0.262213	-0.195452	-0.216889	-0.452266	0.914101	-0.392778	-0.207369	-0.231857	0.154884	-0.505937	0.136285	-0.406465	-0.879604	-0.690909	1.06284	-0.560462	-0.500323	0.378253	-0.368138	-0.348797	0.0592161	-0.141139	0.245118	-0.0379425	-0.434363	-0.456225	-0.466232	-0.467192	0.279403	-0.659385	-0.739267	-1.1088	-0.429075	-0.872415	-1.03543	-0.403239	0.287865
26.2	0.164745	-0.183629	-0.182951	-0.0606496	0.210085	0.225977	-0.162724	-0.318776	-0.0402676	-0.342427	-0.972257	0.392492	-0.345169	-0.338744	-0.380099	0.216604	-0.230468	0.0253695	-0.314612	-0.980364	-0.738027	0.800341	-0.319331	-0.6141	0.0194009	-0.299975	-0.425265	0.0663281	-0.636593	0.566635	0.114612	-0.467429	-0.517542	-0.387412	-0.469586	0.000725616	-0.64512	-0.788571	-0.836024	-0.39656	-1.13358	-0.848223	-0.759395	0.338089
26.3	0.26696	-0.134563	-0.254287	-0.138167	-0.15805	0.100331	-0.183195	-0.160807	0.123207	-0.343748	-0.560037	0.440587	-0.33259	-0.21508	-0.0554192	0.186528	-0.378286	0.0570064	-0.3509	-1.05317	-0.706266	1.01874	-0.669239	-0.697581	0.140917	-0.269542	-0.337616	-0.390874	-0.140481	0.869156	-0.223448	-0.540151	-0.534834	-0.47886	-0.516678	-0.0196508	-0.607492	-0.768276	-0.633344	-0.411206	-0.886718	-1.08677	-0.273387	0.554308
26.4	0.153475	-0.158071	-0.298565	-0.0675665	0.237307	0.192978	-0.344935	-0.368278	-0.0666437	-0.330655	-0.634373	0.567094	-0.388824	-0.198979	0.00807501	0.33663	-0.281637	0.534908	-0.463632	-0.660925	-0.738006	0.645808	-0.224784	-0.552424	0.266735	-0.0024944	-0.552725	-0.3789	-0.105004	0.272687	0.736339	-0.395385	-0.495639	-0.468066	-0.496121	-0.256537	-0.546878	-0.822164	-0.972331	-0.426666	-0.893775	-1.12262	-0.522546	0.496162
26.5	0.145129	-0.00582529	-0.367021	-0.0438488	-0.0815321	-0.0470585	0.170047	-0.0900905	-0.150881	-0.171185	-0.709778	0.245531	-0.31033	-0.111065	-0.274006	0.271869	-0.261819	0.0939144	-0.44233	-1.05839	-0.827945	0.507574	-0.548794	-0.561454	0.106284	0.0749763	-0.627856	-0.536965	-0.413979	0.331854	0.808205	-0.665594	-0.599562	-0.591735	-0.368358	-0.397889	-0.551183	-0.788586	-1.03788	-0.3053	-0.92332	-1.01545	-0.6164	0.192148
26.6	0.28569	0.16192	-0.366254	-0.167168	0.08754	0.0783064	-0.596984	-0.301428	-0.309789	-0.30582	-0.87246	0.182106	-0.306393	-0.0441729	-0.429223	0.215794	-0.384394	-0.247038	-0.404892	-1.02316	-0.758836	0.907746	-0.357383	-0.37441	0.415503	-0.0555171	-0.641391	-0.327169	-0.598495	0.281365	0.644537	-0.619201	-0.562202	-0.365952	-0.343389	-0.282154	-0.535315	-0.684448	-0.907564	-0.470319	-0.766601	-1.24251	-0.439287	0.305012
26.7	0.0575	0.0872321	-0.275636	-0.0663197	-0.0672689	-0.127075	-0.469365	-0.233028	-0.130865	-0.403747	-0.589572	-0.046731	-0.360358	-0.113933	0.167425	0.342795	-0.338298	0.287224	-0.352276	-0.921817	-0.776286	0.934798	-0.629745	-0.516283	0.0248228	-0.0751943	-0.538967	-0.165268	-0.466357	0.321349	0.550354	-0.688329	-0.727844	-0.699202	-0.423267	-0.0967277	-0.601243	-0.731803	-0.804666	-0.279072	-0.766756	-0.983739	-0.546514	0.0789508
26.8	0.168909	0.224874	-0.296043	-0.0595128	0.113819	0.150397	0.21908	-0.0795144	-0.056714	-0.182538	-0.348376	-0.210485	-0.333262	-0.128805	-0.302089	0.138067	-0.245152	0.470288	-0.334709	-0.830841	-0.729448	0.893535	-0.594428	-0.537089	0.136481	0.085221	-0.576914	-0.542151	-0.44045	0.13233	0.958604	-0.636272	-0.702562	-0.325743	-0.492581	0.14282	-0.777853	-0.613106	-1.15976	-0.397709	-0.984707	-1.01111	-0.850086	0.24483
26.9	0.294023	0.140026	-0.250337	-0.0962189	0.139126	0.160763	-0.129079	-0.299766	-0.103313	-0.203314	-0.768688	0.332788	-0.316509	-0.258059	-0.467029	0.497071	-0.20912	-0.0214038	-0.453717	-1.06722	-0.767762	0.502225	-0.331017	-0.487886	0.0622765	-0.117576	-0.606049	-0.0408057	-0.464675	0.346921	1.21783	-0.669675	-0.601506	-0.382361	-0.361462	-0.0395719	-0.678619	-0.58443	-0.913084	-0.357581	-0.652342	-1.21074	-0.338569	0.307772
27	0.154959	0.0523943	-0.285328	-0.123078	0.0488545	0.0979935	0.0455647	-0.464923	0.0915802	-0.182705	-0.660754	0.0320357	-0.302535	-0.103964	-0.0587769	0.162254	-0.44736	0.0661047	-0.346347	-0.995336	-0.85534	0.633963	-0.461636	-0.487653	0.182807	-0.0266577	-0.447343	-0.496739	-0.574942	0.243586	0.768077	-0.436675	-0.709072	-0.320895	-0.358709	0.0991912	-0.69717	-0.826484	-0.905593	-0.36809	-0.91715	-1.11382	-0.447475	0.264622
27.1	0.257159	0.0818099	-0.48837	0.0075839	-0.0838653	-0.0174832	-0.406019	-0.109917	-0.12023	-0.274187	-0.499595	0.196068	-0.406296	-0.147032	-0.269064	0.357907	-0.241785	0.164257	-0.298201	-1.13333	-0.780839	0.841744	-0.640846	-0.527038	0.176913	-0.224929	-0.441312	-0.522109	-0.623747	0.104283	0.812929	-0.528273	-0.579335	-0.389044	-0.45789	0.0633804	-0.538789	-0.716514	-1.16622	-0.37853	-1.16641	-1.06827	-0.410269	0.425901
27.2	0.337193	0.092609	-0.231966	-0.137569	0.0238961	-0.0465367	-0.190938	-0.191142	0.114285	-0.193569	-1.11668	0.165339	-0.389315	-0.301068	-0.356028	0.461029	-0.412686	-0.0147219	-0.387329	-0.951589	-0.694998	0.512863	-0.375904	-0.397624	0.167483	0.0151378	-0.228436	-0.34631	-0.329164	0.264134	0.720935	-0.42483	-0.599263	-0.334264	-0.415932	-0.129017	-0.596379	-0.710118	-0.917796	-0.328	-0.872281	-0.92845	-0.51219	0.357133
27.3	0.241907	0.0531475	-0.273216	-0.188231	0.0840025	0.358934	-0.148028	-0.402051	0.152129	-0.324729	-0.803231	0.403781	-0.317307	-0.212694	-0.0815599	0.290227	-0.34499	0.0799145	-0.319298	-1.231	-0.714658	0.634998	-0.346007	-0.734124	0.0348735	-0.245863	-0.257279	-0.123214	-0.0395102	0.0981441	0.772346	-0.53114	-0.628339	-0.338271	-0.354037	-0.154913	-0.548547	-0.833309	-0.879021	-0.396075	-0.879062	-1.02927	-0.427957	0.561684
27.4	0.303916	0.0407347	-0.224847	-0.165364	-0.105592	0.0404404	-0.124231	-0.300389	0.105246	-0.309694	-0.445568	0.279326	-0.299987	-0.1234	0.0824239	0.623577	-0.436467	0.0356368	-0.370771	-1.03093	-0.630034	0.32445	-0.299884	-0.535255	0.236553	0.340479	-0.290135	0.0788239	-0.299854	-0.0103888	0.967083	-0.436309	-0.499264	-0.194981	-0.318203	-0.0681624	-0.481735	-0.718735	-0.768078	-0.354552	-0.658332	-1.15375	-0.358492	0.298187
27.5	0.527265	0.0516645	-0.287497	-0.131703	0.179639	0.356572	-0.203306	-0.427983	-0.0249596	-0.149042	-0.576713	0.0665804	-0.328453	-0.181595	-0.209538	0.331229	-0.233632	0.32373	-0.462292	-1.06281	-0.735172	0.557849	-0.186211	-0.521813	0.30598	-0.122419	-0.217031	-0.371622	-0.168138	0.247085	0.965997	-0.453851	-0.670793	-0.228744	-0.323141	-0.022986	-0.415797	-0.584978	-0.863456	-0.26374	-0.723965	-1.01906	-0.0555867	0.335747
27.6	0.417906	0.00970571	-0.187269	-0.186069	-0.156448	0.210895	-0.288861	-0.249095	0.213731	-0.330765	-0.683883	0.394518	-0.322151	-0.24813	0.0579371	0.757285	-0.244676	0.0780191	-0.300701	-0.955859	-0.736769	0.197877	-0.438189	-0.494236	0.359595	0.182379	-0.246498	-0.179149	-0.43242	0.205025	1.0076	-0.241065	-0.479758	-0.373733	-0.524565	0.525705	-0.732559	-0.704374	-0.873017	-0.382436	-0.916882	-1.02706	0.197138	0.319556
27.7	0.470981	0.0224428	-0.282962	-0.206758	-0.106026	0.0519875	0.024461	-0.297074	0.181328	-0.298581	-0.744718	0.3413	-0.339362	-0.139371	0.189352	0.322377	-0.305241	0.460816	-0.599488	-0.75329	-0.828256	0.0487085	-0.364421	-0.666307	0.175391	-0.406283	-0.306201	-0.139415	-0.743947	-0.0587986	0.814324	-0.281287	-0.476945	-0.0486947	-0.33693	0.324011	-0.938212	-0.671082	-1.01319	-0.465394	-0.882208	-1.17064	-0.159488	0.328047
27.8	0.615505	0.00547375	-0.168202	-0.151144	-0.0717336	0.304085	-0.306038	0.225949	0.003703	-0.251004	-0.845077	0.0687798	-0.350566	-0.111601	-0.0872972	0.369312	-0.193904	0.104665	-0.446468	-1.21191	-0.640546	0.340243	-0.395757	-0.490503	0.163426	0.100795	-0.149991	-0.326059	-0.0551535	-0.0483939	1.21093	-0.428717	-0.466697	-0.167098	-0.468132	0.355127	-0.648414	-0.64278	-0.594832	-0.404387	-0.660541	-0.902377	-0.280391	0.408511
27.9	0.370078	-0.0477793	-0.39588	-0.271955	-0.0885759	0.11914	-0.629872	-0.0422534	0.00538396	-0.379938	-0.514945	0.173802	-0.342817	-0.247437	0.243949	0.203963	-0.379289	0.195099	-0.382995	-0.864276	-0.817006	0.0809803	-0.331033	-0.441947	0.312626	0.0867804	-0.299228	-0.409376	-0.00382115	0.138686	0.331559	-0.321466	-0.455178	-0.507112	-0.530198	0.144755	-0.861612	-0.70819	-0.78524	-0.418105	-0.988325	-1.15471	-0.384139	0.340818
28	0.20134	0.00463679	-0.317196	-0.169885	0.123375	0.329001	-0.415086	0.261093	0.0925147	-0.313879	-0.336593	0.131328	-0.345265	-0.178217	-0.0433861	0.444709	-0.48515	0.298963	-0.479571	-0.981235	-0.702594	0.106059	-0.458263	-0.664555	0.190581	-0.29208	-0.362715	-0.319371	-0.138815	-0.117529	1.02515	-0.40286	-0.614438	-0.286378	-0.38382	0.0585772	-0.597954	-0.720606	-0.951837	-0.463893	-1.14413	-1.05758	-0.0569387	0.0814505
28.1	0.306874	-0.0865509	-0.356339	-0.130552	-0.0665664	0.281963	-0.0915938	-0.0064075	0.17372	-0.340329	-0.632557	0.298556	-0.3326	-0.258855	0.0135952	0.14514	-0.277783	0.286716	-0.369726	-1.02353	-0.693097	0.393077	-0.840257	-0.721414	0.186111	-0.197827	-0.378697	-0.89672	-0.33984	-0.0167322	0.879468	-0.398518	-0.462764	-0.382975	-0.433172	0.162123	-0.614526	-0.74793	-1.11102	-0.459405	-1.03738	-1.24704	-0.13366	0.500472
28.2	0.341699	0.00820226	-0.317745	-0.0893138	-0.0832303	-0.0407673	-0.407497	-0.14914	-0.113865	-0.232217	-0.595836	0.0779844	-0.383898	-0.182448	-0.130174	-0.106719	-0.355368	0.120929	-0.397036	-0.958431	-0.799258	-0.0439878	-0.683726	-0.646322	0.383524	-0.134462	-0.433585	-0.131036	-0.344243	-0.110894	0.869021	-0.480997	-0.576891	-0.507418	-0.579112	0.116418	-0.680271	-0.684735	-0.736523	-0.414831	-1.13386	-1.1492	-0.0279156	0.288862
28.3	0.440787	-0.0461805	-0.28985	-0.108501	-0.0569172	0.0827392	-0.0843282	-0.318699	-0.0445909	-0.35492	-0.609827	-0.110714	-0.361806	-0.277864	0.0324369	0.218679	-0.399869	-0.355374	-0.342114	-0.958163	-0.774858	0.228879	-0.376458	-0.604241	0.159357	-0.152237	-0.455377	-0.471858	-0.524	0.0970217	0.617035	-0.584989	-0.648797	-0.379689	-0.461808	0.104279	-0.833536	-0.853408	-1.24345	-0.287417	-1.17884	-1.19932	-0.318797	0.170513
28.4	0.366894	-0.0308266	-0.334501	-0.100945	0.136915	0.11409	-0.250061	-0.386141	0.0331581	-0.370597	-0.911197	-0.246508	-0.332286	-0.147781	-0.0383221	0.0392598	-0.274314	-0.136487	-0.286312	-1.02059	-0.866073	0.11124	-0.43957	-0.495658	0.102087	-0.0744836	-0.471858	-0.619809	-0.465745	0.0199039	0.91706	-0.374566	-0.513056	-0.325137	-0.465583	-0.116004	-0.704195	-0.622547	-0.911165	-0.385286	-1.02331	-1.29978	-0.448339	0.417694
28.5	0.224479	0.0223609	-0.268739	-0.117666	0.0494081	0.247567	-0.590101	-0.494913	-0.0287601	-0.413847	-0.696568	-0.223628	-0.374871	-0.0753581	-0.563301	0.0684307	-0.327282	0.323449	-0.413448	-0.758867	-0.81131	0.140083	-0.57157	-0.613124	0.219716	-0.408961	-0.685962	-0.428537	-0.587491	-0.0119423	0.717016	-0.546884	-0.670239	-0.355043	-0.510123	-0.107406	-0.540245	-0.883005	-1.28786	-0.472526	-1.22978	-1.00429	-0.228382	0.286576
28.6	0.262578	-0.0436349	-0.432773	-0.138831	-0.07483	0.394562	-0.149061	-0.299778	0.0307051	-0.416651	-0.429293	-0.23312	-0.413677	-0.151565	-0.142726	0.261808	-0.223654	0.0435682	-0.423966	-1.00343	-0.766423	0.0175049	-0.793053	-0.82074	0.221754	-0.233528	-0.640858	-0.273331	-0.267575	-0.11187	0.608831	-0.541202	-0.661684	-0.299789	-0.589908	-0.0217691	-0.864395	-0.806187	-1.06063	-0.414961	-1.03171	-1.10848	0.134816	0.166051
28.7	0.305921	-0.0623927	-0.351996	-0.142252	-0.113873	0.246092	0.0842779	0.357472	-0.0174918	-0.331462	-0.856535	-0.148277	-0.372119	-0.187802	-0.0527599	0.262926	-0.19009	-0.0450349	-0.484923	-0.948629	-0.773302	0.250076	-0.449379	-0.745394	0.00535594	-0.217094	-0.582857	-0.461483	-0.483915	0.128742	0.553516	-0.648822	-0.597848	-0.341182	-0.542372	0.07004	-0.891725	-0.699956	-0.881786	-0.368851	-1.08432	-1.0625	-0.260164	0.0988441
28.8	0.302067	-0.0836863	-0.390159	-0.118563	0.124773	0.0428582	-0.350416	0.158342	-0.25096	-0.20259	-0.423637	-0.396739	-0.374563	-0.138036	-0.0258674	0.143188	-0.492119	-0.133881	-0.30301	-1.09293	-0.836037	0.293472	-0.366116	-0.580489	0.116498	-0.357456	-0.769616	-0.601385	-0.18176	-0.0317167	0.292397	-0.707229	-0.375922	-0.479302	-0.598924	0.236013	-0.940053	-0.634984	-0.777802	-0.433801	-0.967112	-0.953349	-0.0686147	0.209382
28.9	0.384934	-0.132168	-0.2803	-0.213555	-0.03728	0.254827	-0.378835	-0.267554	-0.0849862	-0.230765	-0.36058	-0.404373	-0.338459	-0.263961	-0.239504	0.0468492	-0.394968	-0.206308	-0.300071	-1.21175	-0.88352	0.317484	-0.483193	-0.701358	0.145303	-0.395723	-0.692912	0.0466595	-0.677522	-0.332407	0.394435	-0.592704	-0.642443	-0.39186	-0.522464	0.321432	-0.886554	-0.773099	-0.861047	-0.445953	-0.978369	-1.14234	0.437378	0.0522793
29	0.331058	-0.110418	-0.291236	-0.0953529	-0.0417287	0.150936	-0.303034	-0.187711	-0.110586	-0.130626	-0.348025	-0.389938	-0.393091	-0.150829	-0.37676	-0.119284	-0.340333	0.014559	-0.33883	-0.863429	-0.821145	0.265536	-0.23246	-0.668204	0.178989	-0.157645	-0.651009	-0.305145	-0.195594	-0.0330627	0.546501	-0.447226	-0.393789	-0.447944	-0.479863	0.0221747	-0.840745	-0.727468	-0.757714	-0.494711	-0.64257	-1.08667	0.458814	0.547322
29.1	0.360812	-0.172643	-0.300168	-0.210751	-0.0354106	0.0329281	-0.703731	-0.217975	-0.194414	-0.485057	-0.540623	-0.332137	-0.330293	-0.220106	-0.117071	0.105741	-0.274478	0.209514	-0.443719	-0.940025	-0.838411	-0.00739322	-0.325583	-0.575324	0.313267	0.0672032	-0.688716	0.0655876	-0.417118	-0.0706858	0.89126	-0.303338	-0.393516	-0.530516	-0.482752	0.487917	-0.7437	-0.731677	-1.11602	-0.429952	-1.09107	-0.958063	0.623321	0.53484
29.2	0.355742	-0.136862	-0.462221	-0.174824	-0.0344509	0.0635441	-0.228544	-0.17369	-0.153202	-0.343387	-0.702755	-0.247499	-0.348593	-0.270195	-0.00647826	0.423769	-0.30403	-0.125573	-0.434029	-1.00662	-0.729653	0.046525	-0.641581	-0.591005	0.174148	-0.316139	-0.719293	-0.177744	-0.0675513	-0.0559191	1.20056	-0.39657	-0.374824	-0.50956	-0.518885	-0.0403832	-0.926095	-0.700099	-0.758583	-0.490211	-0.68406	-0.974451	0.356632	0.490986
29.3	0.230877	-0.134809	-0.130842	-0.194218	-0.00277504	0.0510353	-0.130986	-0.0649693	-0.177079	-0.301656	-0.365307	-0.23191	-0.37101	-0.166204	-0.342535	0.294412	-0.350456	-0.360185	-0.254603	-0.719614	-0.875948	0.101685	-0.305839	-0.709636	0.0330431	-0.0937043	-0.638834	-0.0555821	-0.0427872	-0.183106	0.923188	-0.60805	-0.377769	-0.51452	-0.555747	0.00626478	-0.766079	-0.645458	-0.991373	-0.425548	-0.706877	-1.07145	0.488522	0.325676
29.4	0.252877	-0.134493	-0.282508	-0.0748784	0.0682016	0.36955	-0.504422	-0.196942	-0.311355	-0.297791	-0.627164	-0.567112	-0.429525	-0.318238	-0.328389	0.257261	-0.366538	0.0017221	-0.488857	-1.32654	-0.837439	-0.0144217	-0.35099	-0.646706	0.308846	-0.00656922	-0.763872	-0.176734	-0.419014	-0.129557	0.711228	-0.393342	-0.371733	-0.22319	-0.556796	0.200606	-0.733851	-0.801384	-1.12953	-0.367775	-1.05271	-1.13698	0.528891	0.181728
29.5	0.176614	-0.177401	-0.337363	-0.183111	-0.188651	0.0319089	-0.61679	-0.0217856	-0.193624	-0.253334	-0.48453	-0.407676	-0.398759	-0.195359	-0.199111	0.106102	-0.408284	-0.0803241	-0.401766	-0.993084	-0.900786	0.193968	-0.703228	-0.567042	0.313628	0.00656923	-0.783633	-0.336606	-0.178271	-0.0223311	1.113	-0.534278	-0.298436	-0.22646	-0.505185	-0.103874	-0.815293	-0.716611	-1.04423	-0.481179	-1.02475	-0.894076	0.0204643	0.224322
29.6	0.280029	-0.23356	-0.272401	-0.166129	-0.155371	0.296042	-0.961278	-0.107074	-0.212524	-0.309487	-0.104343	-0.128484	-0.366797	-0.121599	-0.458157	0.237072	-0.270184	-0.386253	-0.341793	-1.18106	-0.877458	-0.229878	-0.585333	-0.604976	0.220611	-0.0259437	-0.758004	-0.302426	-0.44094	0.0472566	0.894022	-0.551962	-0.36968	-0.354536	-0.471931	-0.272696	-0.86688	-0.77785	-1.16161	-0.330288	-1.01497	-1.02194	0.237689	0.397587
29.7	0.26508	-0.227115	-0.351398	-0.195499	-0.137822	-0.215993	-0.31034	-0.167512	-0.0954859	-0.402854	-0.798762	-0.851201	-0.296162	-0.303721	-0.19861	0.0423267	-0.270111	0.355756	-0.276334	-1.16373	-0.852399	-0.0840947	-0.732836	-0.568727	0.0865434	0.0600337	-0.747375	-0.135969	-0.327898	-0.135106	1.61736	-0.440216	-0.469883	-0.389222	-0.545128	-0.0647695	-0.698043	-0.761205	-1.06343	-0.381535	-1.46663	-0.99342	0.144434	0.0527424
29.8	0.196989	-0.172449	-0.246988	-0.234114	0.0956061	0.135059	-0.96389	-0.376561	-0.305308	-0.369087	-0.560105	-0.494966	-0.346279	-0.129304	-0.225096	-0.00111445	-0.194495	-0.0619124	-0.39744	-1.1774	-0.857109	-0.37342	-0.543654	-0.511192	0.159446	0.120858	-0.760333	-0.57648	-0.694054	0.00251146	2.4919	-0.690245	-0.506974	-0.349631	-0.552781	-0.0117634	-0.652835	-0.764004	-1.06409	-0.442513	-1.04297	-0.77976	0.174188	0.364763
29.9	0.262426	-0.0846475	-0.311041	-0.115576	-0.113803	-0.0769215	-0.915351	-0.0979241	-0.24746	-0.288354	-0.379492	-0.388671	-0.374058	-0.271173	-0.517695	0.060992	-0.215976	0.0676013	-0.540427	-0.985424	-1.02376	-0.0379423	-0.992326	-0.644616	0.171367	-0.279159	-0.717127	0.244685	-0.57347	0.0921908	2.52381	-0.465962	-0.621302	-0.442786	-0.681582	0.0408339	-0.532525	-0.67385	-1.1801	-0.438265	-1.6162	-1.09024	-0.0563691	0.364293
30	0.0369978	-0.0770115	-0.350391	-0.200289	0.104738	0.166661	-0.264972	-0.280631	0.0859424	-0.313433	-0.617632	-0.70513	-0.339121	-0.0985516	-0.543793	0.0711519	-0.202114	-0.0778403	-0.390241	-1.22013	-0.919061	-0.0354532	-0.73954	-0.532846	0.12865	-0.0835044	-0.861925	0.178658	-0.536896	-0.128106	2.26822	-0.583192	-0.479369	-0.546704	-0.553101	0.0480573	-0.802996	-0.857749	-1.07924	-0.487338	-1.07091	-0.959476	0.192486	0.0863161
30.1	0.140591	-0.17689	-0.400522	-0.226666	-0.100925	0.138338	-0.870607	0.121157	-0.211678	-0.159423	-0.518735	-0.505186	-0.371567	-0.244294	-0.264422	0.0838788	-0.481538	-0.166057	-0.673478	-1.27187	-0.847437	-0.405861	-0.746713	-0.616326	0.250747	-0.0125672	-0.772982	0.375995	-0.502594	0.0520484	2.80254	-0.447971	-0.43867	-0.311713	-0.528917	0.041555	-0.578209	-0.747604	-1.09141	-0.376506	-0.969237	-0.980976	0.265754	0.141688
30.2	0.121564	-0.11245	-0.30787	-0.217025	-0.0602578	0.0426881	-0.48607	-0.075106	-0.218423	-0.368115	-0.563777	-0.623932	-0.328867	-0.143587	-0.370917	-0.23666	-0.332173	0.00559544	-0.443388	-1.23545	-0.901736	0.116305	-0.779999	-0.564393	-0.0036089	0.189456	-0.738901	0.395538	-0.54058	-0.108827	2.25523	-0.506256	-0.463607	-0.34709	-0.555492	0.247142	-0.560463	-0.801508	-0.860624	-0.514663	-1.18844	-1.22087	0.0730952	0.386772
30.3	0.20387	-0.139615	-0.252501	-0.170779	-0.250177	-0.121512	-0.863425	0.178322	-0.00069918	-0.444807	-0.632444	-0.929947	-0.340785	-0.186269	-0.22426	-0.0807055	-0.486973	-0.231003	-0.583925	-1.05795	-0.843101	0.157126	-0.486672	-0.529602	0.206156	-0.266001	-0.657673	-0.0621139	-0.518794	-0.0618359	2.36124	-0.390061	-0.503405	-0.435063	-0.609479	0.216298	-1.11723	-0.739265	-1.08314	-0.46797	-1.00018	-1.40358	-0.193848	0.634355
30.4	0.160791	-0.143173	-0.307179	-0.178199	-0.0802328	0.212333	-0.523533	-0.279015	-0.089555	-0.254006	-0.593046	-0.729419	-0.373995	-0.119258	-0.0474181	-0.143029	-0.296138	0.474172	-0.433278	-1.26886	-0.841783	0.0679139	-0.543702	-0.685935	0.277801	0.0590735	-0.68596	0.109321	-0.606994	-0.268412	2.3536	-0.373502	-0.466608	-0.350577	-0.530422	0.0588341	-0.583829	-0.72929	-0.925529	-0.398842	-0.969617	-1.14516	0.168543	0.54308
30.5	-0.0199172	-0.128369	-0.300644	-0.102235	-0.255364	-0.0247744	-0.701152	0.0211265	-0.298443	-0.0521909	-0.417653	-0.454611	-0.391496	-0.201909	-0.0780986	-0.189578	-0.279359	0.0360714	-0.474245	-1.31332	-0.943316	0.0186984	-0.47857	-0.652102	0.308097	-0.172366	-0.630149	-0.069214	-0.805642	-0.23957	1.93099	-0.470329	-0.306668	-0.515702	-0.702571	0.016631	-0.84702	-0.851867	-1.20619	-0.543632	-1.14743	-1.32932	0.366594	0.306561
30.6	0.122324	-0.194309	-0.306391	-0.131555	-0.309207	0.0857051	-0.68979	0.046642	0.183061	-0.129358	-0.52544	-0.697243	-0.343643	-0.174832	-0.111817	-0.147586	-0.230571	0.414842	-0.545517	-1.31176	-0.845925	0.000633196	-0.38047	-0.650388	0.418649	-0.300509	-0.607009	-0.318032	-0.502853	-0.224938	1.82216	-0.40146	-0.567979	-0.40022	-0.564826	0.00518309	-0.724926	-0.758211	-1.27498	-0.447279	-1.09106	-1.17632	0.565037	0.486616
30.7	0.0565346	-0.146637	-0.304458	-0.119631	0.0305199	0.203187	-0.336224	-0.117931	-0.151126	-0.370452	-0.263398	-0.905322	-0.418591	-0.240805	-0.358027	0.0335608	-0.343242	0.171763	-0.332277	-1.35979	-0.858868	0.138042	-0.800118	-0.747221	0.0962252	0.0953518	-0.574555	-0.435808	-0.521011	-0.236534	1.66047	-0.568566	-0.428736	-0.36996	-0.616715	-0.0601399	-0.689798	-0.732644	-0.882227	-0.585544	-1.14035	-1.25601	0.990052	0.586142
30.8	-0.016618	-0.13301	-0.278154	-0.206301	-0.285467	0.0442722	-0.644839	-0.150621	-0.101535	-0.238903	-0.603319	-0.459146	-0.40569	-0.2189	-0.192568	0.322022	-0.331017	0.242317	-0.419771	-1.32179	-0.859131	0.0615143	-0.801532	-0.66048	0.319136	-0.0686094	-0.562861	-0.602068	-0.154896	0.0946255	1.84864	-0.461179	-0.455637	-0.397356	-0.671003	0.179598	-0.766536	-0.656776	-0.908636	-0.52664	-0.815085	-1.00709	0.554251	0.439531
30.9	0.00772162	-0.198397	-0.283038	-0.128622	-0.182007	0.086464	-0.503956	0.0571196	-0.1974	-0.227428	-0.554414	-0.639197	-0.360593	-0.19447	0.0164694	0.16506	-0.405265	-0.13673	-0.357944	-1.13982	-0.853573	0.186468	-0.674492	-0.531265	0.157886	0.133467	-0.521942	-0.352378	-0.439568	-0.134633	1.21062	-0.517898	-0.43513	-0.404139	-0.610455	0.0701387	-0.618717	-0.787292	-0.95821	-0.437133	-1.02183	-1.08378	0.704503	0.458366
31	0.140409	-0.118907	-0.283713	-0.259364	-0.137932	-0.126635	-0.0710649	-0.364204	0.00935494	-0.118277	-0.596978	-0.699321	-0.419948	-0.0759529	-0.0585228	-0.0868292	-0.390532	0.303596	-0.383465	-0.891601	-0.756976	0.0755564	-0.645028	-0.696374	0.198289	-0.226352	-0.316101	-0.158671	-0.456727	0.0130751	1.34721	-0.495332	-0.42709	-0.157351	-0.546885	-0.0558942	-0.556562	-0.766684	-1.07059	-0.387403	-1.31888	-0.823848	0.263294	0.493459
31.1	0.0995271	-0.102804	-0.289565	-0.157084	-0.0383464	0.059724	-0.678336	0.0325502	-0.0170045	-0.275498	-0.638016	-0.458194	-0.371583	-0.262783	-0.421714	-0.16948	-0.444106	-0.256918	-0.199628	-1.09521	-0.827012	0.209656	-0.413037	-0.550399	0.0860738	-0.212126	-0.285069	-0.455486	-0.36179	-0.28763	1.64499	-0.582753	-0.301145	-0.349334	-0.59639	-0.103666	-0.682078	-0.828699	-1.2946	-0.541083	-1.28024	-0.919724	0.528664	0.423145
31.2	0.179695	-0.10662	-0.303106	-0.102975	-0.070649	0.315744	-0.24272	-0.349137	-0.0888224	-0.402818	-0.312029	-0.307261	-0.390052	-0.256341	-0.218841	-0.0273974	-0.238845	-0.0645629	-0.378315	-0.952372	-0.765653	0.176857	-0.559464	-0.623779	-0.0845178	-0.183826	-0.273075	-0.367662	-0.199437	0.0655992	1.78959	-0.411355	-0.307094	-0.349576	-0.658576	0.109867	-0.825091	-0.704944	-1.01747	-0.522739	-1.13183	-0.94357	0.639561	0.227442
31.3	0.0727823	-0.112803	-0.250741	-0.0437196	0.00811955	0.301701	-0.600717	0.200453	-0.155366	-0.245096	-0.541248	-0.343369	-0.375476	-0.162102	-0.192522	0.19354	-0.349649	0.346367	-0.279514	-1.09286	-0.812878	0.177953	-0.599939	-0.650795	0.371572	-0.157948	-0.333554	-0.335658	-0.236755	-0.208931	1.90452	-0.428749	-0.428751	-0.394973	-0.624273	-0.130608	-0.777463	-0.675668	-1.09048	-0.324252	-1.2136	-1.15587	0.395898	0.663094
31.4	0.0681701	-0.102519	-0.302613	-0.11874	-0.00244957	-0.198678	-0.755966	0.30034	-0.192497	-0.284923	-0.254719	-0.850162	-0.331167	-0.262629	-0.045627	0.260998	-0.314705	0.547696	-0.260977	-0.928795	-0.779703	0.577316	-0.66536	-0.726636	0.0863034	-0.0484404	-0.391742	-0.556505	-0.325537	-0.125745	1.78403	-0.404895	-0.534899	-0.240996	-0.563598	-0.0208677	-0.787537	-0.751961	-0.898626	-0.424058	-1.23704	-1.1284	0.685132	0.532216
31.5	0.0905502	-0.0154637	-0.387617	-0.113903	0.110002	0.0298705	-0.30126	0.0897368	-0.0769904	-0.233846	-0.370856	-0.525886	-0.422371	-0.204493	-0.710291	-0.0117779	-0.430185	0.503795	-0.208442	-1.1393	-0.777016	0.817555	-0.912557	-0.669759	0.235383	0.0917135	-0.214167	-0.276188	-0.146849	-0.138193	1.74219	-0.436298	-0.413014	-0.255721	-0.639526	0.0963936	-0.902833	-0.783702	-0.898908	-0.438205	-1.17686	-1.10364	0.2221	0.424813
31.6	0.0741242	-0.0587473	-0.409442	-0.109731	-0.275157	0.054443	-0.603707	0.0835178	-0.205493	-0.217192	-0.108801	-0.643955	-0.371909	-0.171787	-0.202811	0.0151129	-0.38841	-0.12692	-0.32919	-1.21131	-0.819289	0.651235	-0.680035	-0.668105	0.185611	-0.0409863	-0.317752	-0.459911	-0.382771	0.0180591	1.50239	-0.627788	-0.359598	-0.319883	-0.438858	-0.149823	-0.774603	-0.76403	-0.588591	-0.460018	-0.911051	-1.00075	0.554053	0.216002
31.7	0.133177	-0.0393805	-0.459131	-0.0774058	-0.139139	-0.10224	-0.85531	0.162211	-0.207194	-0.259954	-0.169626	-0.43433	-0.362372	-0.295869	-0.0764357	0.466048	-0.202904	-0.390258	-0.314089	-1.07281	-0.837217	0.555277	-0.623526	-0.786745	0.103087	-0.15814	-0.367264	-0.639533	-0.43614	0.179644	1.87258	-0.384942	-0.184971	-0.356537	-0.647847	0.0824944	-0.841352	-0.830763	-1.11169	-0.414348	-0.650043	-1.20738	0.422744	0.465975
31.8	0.0421462	-0.00974765	-0.265383	-0.143742	-0.0340951	-0.0201096	-0.792328	0.243892	-0.288742	-0.416226	-0.496874	-0.629929	-0.365092	-0.280218	-0.228141	0.176675	-0.38326	0.49209	-0.347567	-1.10286	-0.827311	0.507481	-0.862801	-0.68084	0.132163	-0.308001	-0.340484	-0.366542	-0.547002	-0.017962	2.8976	-0.4926	-0.258576	-0.599064	-0.621589	-0.0194254	-0.552233	-0.768488	-0.756683	-0.480548	-1.20438	-1.05836	0.346255	0.486288
31.9	0.117659	0.0603182	-0.302436	-0.163111	0.0989456	0.135851	-0.724635	0.171414	-0.176108	-0.285864	-0.272302	-0.526402	-0.408226	-0.182622	-0.6132	-0.0100049	-0.456428	-0.457228	-0.333725	-0.94078	-0.873653	0.273466	-0.647186	-0.68642	0.238584	-0.0493611	-0.236944	-0.409181	-0.804076	-0.324779	2.19154	-0.613895	-0.319458	-0.483809	-0.692805	-0.0358311	-0.569176	-0.742308	-1.34701	-0.433034	-1.11129	-1.22392	0.619994	0.398662
32	0.159208	-0.0344262	-0.291264	-0.132419	0.0365763	0.258928	-0.474262	0.0669938	-0.0453916	-0.310552	-0.495669	-0.590053	-0.345602	-0.0516421	-0.420062	0.167431	-0.186806	0.301718	-0.411726	-1.27437	-0.868835	0.732859	-0.455943	-0.775723	0.122202	-0.220554	-0.326521	-0.287029	-0.397238	0.0690311	2.20905	-0.59064	-0.410133	-0.268434	-0.645749	0.0615298	-0.828002	-0.739222	-1.24837	-0.454046	-0.95394	-1.1901	0.206747	0.500768
32.1	0.0300662	-0.0130769	-0.29944	-0.230755	-0.130853	-3.89953e-05	-0.722904	0.326563	-0.146206	-0.323003	-0.177796	-0.762871	-0.301909	-0.158544	-0.576001	0.160893	-0.208213	-0.14536	-0.507078	-0.994296	-0.888467	0.896455	-0.574938	-0.789289	0.201698	0.225213	-0.370481	-0.612202	-0.845457	-0.00899718	2.05951	-0.357302	-0.530095	-0.371257	-0.65732	0.0573184	-0.734012	-0.68642	-1.548	-0.399697	-1.09461	-1.27783	0.518898	0.286497
32.2	0.0391482	0.226131	-0.368336	-0.209561	-0.0985179	-0.0246176	-0.812919	-0.448186	-0.0691946	-0.176161	-0.39877	-0.61221	-0.37427	-0.297551	-0.212584	-0.114016	-0.34903	0.0923363	-0.374026	-1.42308	-0.839846	0.392376	-0.47766	-0.562861	0.184302	-0.178872	-0.534756	-0.68416	-0.506463	0.0648248	1.97757	-0.370852	-0.287365	-0.194632	-0.67657	0.140336	-0.758142	-0.743185	-1.25958	-0.415201	-1.08122	-1.24214	0.596809	0.297106
32.3	0.0908842	0.180796	-0.322318	-0.174385	-0.0190179	-0.118006	-0.577331	0.194806	-0.0868703	-0.170691	-0.35898	-0.656347	-0.382718	-0.246716	-0.329517	0.39634	-0.219034	0.388158	-0.431593	-1.30818	-0.86552	0.983355	-0.709988	-0.729518	-0.0186652	-0.0723833	-0.317218	-0.0558663	-0.336452	-0.0783127	1.90623	-0.48108	-0.378339	-0.0972876	-0.558987	0.163587	-0.752527	-0.741269	-0.717855	-0.380861	-0.947013	-1.11606	0.522546	0.444026
32.4	0.063362	0.108404	-0.311167	-0.179924	-0.179957	0.250588	-0.201233	-0.115753	0.0281401	-0.348569	-0.301496	-0.688222	-0.360891	-0.0794376	-0.0740752	0.14509	-0.327858	0.385731	-0.223464	-0.991585	-0.700808	0.856623	-0.844795	-0.550262	0.00604555	0.00842575	-0.3185	-0.510709	-0.325184	-0.0189976	1.64444	-0.640185	-0.416108	-0.156542	-0.594772	0.349065	-0.776529	-0.72665	-1.04865	-0.528522	-0.961657	-1.13698	0.30967	0.15407
32.5	0.0356807	0.202111	-0.36047	-0.10849	-0.0960352	-0.363858	-0.446714	-0.31523	-0.0291387	-0.389537	-0.329298	-0.622059	-0.328566	-0.0668005	-0.450631	-0.0208119	-0.333648	0.267718	-0.234174	-0.937539	-0.867019	0.400915	-0.67817	-0.777354	0.189854	-0.253773	-0.351924	-0.619377	-0.446656	0.146936	1.79879	-0.312366	-0.546721	-0.165551	-0.617104	0.503715	-0.721831	-0.760385	-0.670544	-0.450743	-0.774855	-1.10731	0.424759	0.405135
32.6	0.0285157	0.127427	-0.335765	-0.0642328	0.0760564	0.164425	-0.416886	-0.290354	0.0690177	-0.244169	-0.318561	-0.0685427	-0.371199	-0.266736	-0.34233	0.245404	-0.363247	-0.201367	-0.239839	-1.15555	-0.846419	0.718709	-0.816156	-0.461564	0.173573	-0.322335	-0.36931	-0.610692	-0.525285	0.00301634	1.4472	-0.647666	-0.474688	-0.0483324	-0.577288	0.302486	-0.878616	-0.774527	-1.11601	-0.467557	-0.614459	-1.32936	-0.132776	0.385363
32.7	-0.046682	0.107744	-0.319155	-0.0887796	0.0463191	0.11978	-0.534561	0.000889746	-0.15996	-0.29212	-0.362572	-0.562017	-0.384473	-0.157128	-0.466721	0.0132133	-0.429098	-0.2917	-0.245676	-0.924687	-0.820478	0.626073	-0.524316	-0.772882	0.0957512	0.159481	-0.336862	-0.21231	-0.208076	-0.264569	1.24257	-0.624349	-0.615139	-0.222595	-0.493107	0.171344	-0.607878	-0.709206	-1.21401	-0.34094	-0.781947	-1.15441	0.36631	0.431975
32.8	-0.00752441	0.105717	-0.330138	-0.221674	-0.124502	-0.0312424	-0.175736	-0.134856	0.0543904	-0.395282	-0.180171	-0.680757	-0.384927	-0.191843	-0.0791981	0.335399	-0.447053	0.105821	-0.302615	-1.12532	-0.887884	0.688252	-0.455622	-0.574002	0.245662	0.101716	-0.350024	-0.454389	-0.0158906	-0.127301	1.27964	-0.586173	-0.51787	-0.139895	-0.668619	0.347314	-0.620699	-0.714605	-0.824442	-0.412429	-0.797837	-1.16691	-0.0569668	0.298915
32.9	0.00640182	0.0806543	-0.343415	-0.14536	0.0823593	-0.0773625	-0.372283	0.0387128	-0.102391	-0.369401	-0.333492	-0.302157	-0.412379	-0.182422	-0.253186	0.26816	-0.350621	-0.0784439	-0.334777	-1.17811	-0.810897	0.441586	-0.844021	-0.757372	0.348896	0.0299899	-0.31026	-0.834121	-0.232808	0.0143049	0.90925	-0.584208	-0.619979	-0.136815	-0.629666	0.243988	-0.808607	-0.680743	-0.991456	-0.403915	-0.717245	-1.08056	-0.0281856	0.1596
33	0.116665	0.00562441	-0.48903	-0.124398	-0.195055	0.0740736	-0.840223	0.180166	-0.14351	-0.329255	-0.478513	-0.236755	-0.350307	-0.268475	-0.379387	0.323006	-0.262872	-0.0423187	-0.390596	-0.987484	-0.82539	0.594799	-0.708185	-0.591723	0.122425	-0.562784	-0.445303	-0.372256	0.147834	-0.269702	1.14621	-0.488958	-0.563545	-0.123049	-0.611613	0.0479194	-0.760829	-0.65919	-1.10887	-0.312255	-0.912004	-1.42565	0.0336391	0.192016
33.1	0.0648401	0.0381793	-0.30851	-0.173451	-0.0317923	0.0808733	-0.252012	-0.0641667	0.180065	-0.367213	-0.46434	-0.351386	-0.385053	-0.171406	-0.43225	0.242386	-0.27344	0.194079	-0.422683	-0.885614	-0.776229	0.646637	-0.926104	-0.70166	0.283701	0.277149	-0.520629	-0.136353	-0.116661	-0.182734	0.887756	-0.255619	-0.411335	-0.0624421	-0.572972	0.247383	-0.638829	-0.779076	-0.876849	-0.512761	-0.926069	-1.17349	-0.308205	0.0923482
33.2	0.0979152	0.0511974	-0.33029	-0.117627	-0.20181	0.211917	-0.447906	-0.274964	-0.176479	-0.241461	-0.0938427	-0.500269	-0.374734	-0.161412	-0.278437	0.458258	-0.223844	0.22138	-0.493761	-1.07636	-0.830859	0.21157	-0.602356	-0.598919	0.200654	-0.439436	-0.458949	-0.0126736	-0.471095	-0.331423	0.757834	-0.447511	-0.277294	-0.373755	-0.504342	0.120912	-0.751201	-0.669604	-0.723472	-0.46628	-0.634302	-1.38235	-0.39367	0.320881
33.3	0.0818439	0.0355578	-0.218084	-0.0817197	0.011871	0.0151704	-0.167265	-0.105846	-0.077739	-0.417168	-0.281787	-0.617276	-0.371659	-0.205586	-0.203282	0.229593	-0.40142	0.473647	-0.287042	-0.949032	-0.766904	0.368712	-0.727819	-0.585039	0.0793651	-0.238211	-0.583879	-0.437068	-0.286934	-0.214671	1.63923	-0.245651	-0.397607	-0.205295	-0.653311	0.170691	-0.799437	-0.817055	-1.19696	-0.448809	-1.09481	-1.28393	-0.271741	0.362911
33.4	0.00124699	0.110554	-0.346518	-0.116614	0.0449556	-0.157248	-0.716942	-0.170979	-0.172182	-0.330336	-0.363924	-0.533481	-0.316432	-0.193306	-0.0518698	0.163656	-0.37704	0.108512	-0.450087	-0.913578	-0.837181	0.343995	-1.03568	-0.637456	0.11625	-0.387093	-0.428689	-0.0706882	-0.102506	0.129047	1.00411	-0.432073	-0.476851	-0.292662	-0.703897	0.257542	-0.827519	-0.623255	-0.932313	-0.419664	-0.822478	-1.3444	-0.323276	0.325844
33.5	0.105916	-0.00106295	-0.167436	-0.137127	-0.12603	-0.000381016	-0.755233	0.0940434	0.0380147	-0.324104	-0.265132	-0.487502	-0.355015	-0.23804	-0.370081	0.0533094	-0.323136	-0.0132551	-0.301494	-1.09569	-0.820301	0.312021	-0.742661	-0.641371	0.531229	0.215675	-0.496598	-0.716361	0.0154578	-0.0281243	1.17364	-0.431036	-0.270498	-0.0934199	-0.578995	0.0405184	-0.678488	-0.697885	-1.05143	-0.450462	-0.498758	-1.17715	-0.162286	0.271029
33.6	0.0515295	-0.0502998	-0.410098	-0.0532522	-0.219191	-0.0255584	-0.510144	-0.0761623	-0.157552	-0.449424	-0.279389	-0.398051	-0.411028	-0.230658	-0.135988	0.107769	-0.317419	-0.204179	-0.235498	-1.03953	-0.842557	0.511781	-0.988427	-0.775289	0.337624	-0.304526	-0.47691	-0.539672	-0.183188	-0.379979	1.01303	-0.477226	-0.595673	-0.302969	-0.513145	0.0188395	-1.0162	-0.865303	-0.537078	-0.562241	-0.79096	-1.14837	-0.0874823	0.19772
33.7	0.0692199	-0.0250009	-0.236329	-0.246607	0.0445373	0.125167	-0.851368	-0.0588463	0.147035	-0.316097	-0.252252	-0.603555	-0.358292	-0.174635	-0.454764	0.250158	-0.256783	0.0142873	-0.400916	-0.86006	-0.804184	0.453876	-0.660473	-0.671781	0.268628	-0.106951	-0.304941	-0.604238	0.0591726	-0.0685511	0.964301	-0.478174	-0.168154	-0.107499	-0.507189	-0.0958371	-0.696838	-0.796823	-0.773588	-0.469475	-0.955984	-1.0813	-0.262047	0.243498
33.8	0.119803	-0.041677	-0.328844	-0.142169	-0.103558	-0.0060368	-0.353384	-0.234713	-0.139496	-0.34996	-0.221885	-0.675367	-0.405437	-0.171502	-0.346651	0.215254	-0.341651	0.384364	-0.291579	-0.992163	-0.816519	0.338187	-0.548404	-0.618338	-0.00206419	-0.22274	-0.426743	-0.241095	0.143448	-0.194526	0.709844	-0.489936	-0.211266	-0.288042	-0.543849	0.126134	-0.751064	-0.67059	-0.838222	-0.559272	-0.999722	-0.949455	-0.49092	0.169687
33.9	0.0837735	0.0446353	-0.291675	-0.192408	-0.122626	0.0791986	-0.40469	-0.00915358	-0.0943011	-0.485181	-0.0462143	-0.148731	-0.395766	-0.256659	-0.00643264	0.190179	-0.514013	0.110465	-0.309411	-0.867777	-0.768883	0.228031	-0.668372	-0.473207	0.178062	-0.295319	-0.37362	-0.348895	-0.258889	-0.0676508	0.0281806	-0.501645	-0.386225	-0.426635	-0.571432	0.471201	-0.938374	-0.666046	-1.08292	-0.411423	-0.865098	-1.07343	-0.199909	0.305992
34	0.133445	0.0161441	-0.35408	-0.12064	-0.0919289	0.16327	-0.219262	-0.138118	-0.0905061	-0.303946	0.167853	-0.313546	-0.405715	-0.279745	-0.493264	0.180585	-0.333699	0.267989	-0.416924	-0.985506	-0.80179	0.188048	-0.587401	-0.849751	0.157493	-0.310891	-0.509476	-0.416476	-0.394856	-0.083378	0.400657	-0.136348	-0.369862	-0.257819	-0.423791	0.436575	-0.889917	-0.614411	-0.448473	-0.431456	-0.75364	-1.06924	0.011933	0.355114
34.1	0.118314	-0.148107	-0.424277	-0.170421	0.0572284	-0.0371224	-0.557691	-0.277728	-0.0927381	-0.213242	-0.324544	-0.577307	-0.385908	-0.150452	-0.135234	0.13241	-0.306781	0.557988	-0.313447	-1.00682	-0.750765	0.237897	-0.391032	-0.609174	-0.05218	-0.665747	-0.394001	-0.42636	-0.428797	0.00167323	0.314178	-0.518862	-0.275232	-0.129394	-0.632611	0.295653	-0.772883	-0.671503	-0.822215	-0.453257	-0.599382	-1.10928	-0.19478	0.30571
34.2	0.176264	-0.0599232	-0.303584	-0.196492	-0.0645208	0.103898	-0.45774	-0.444649	-0.169675	-0.328199	-0.169485	-0.268203	-0.396516	-0.306929	0.299088	0.262407	-0.285178	0.208359	-0.336726	-0.628177	-0.72998	0.478641	-0.780096	-0.766156	0.292124	0.220979	-0.0957641	-0.260255	-0.0561428	-0.153884	0.57898	-0.28002	-0.339756	-0.0220178	-0.42288	0.637625	-0.811205	-0.610246	-0.609201	-0.347772	-0.924556	-0.951996	-0.382234	0.519674
34.3	0.0533335	-0.00255275	-0.294739	-0.106265	0.0797069	0.0979508	-0.507403	-0.211513	0.175835	-0.353717	-0.155733	-0.169056	-0.358773	-0.150068	0.0381852	0.0256666	-0.287525	0.11445	-0.376072	-0.77697	-0.779974	0.270761	-0.846593	-0.860759	0.272144	-0.380516	-0.213818	-0.740887	-0.0864896	-0.20618	0.374143	-0.280156	-0.222521	-0.333234	-0.428769	0.386615	-0.820704	-0.682362	-0.563509	-0.501915	-0.709797	-1.06758	-0.0733377	0.457076
34.4	0.0890019	-0.138533	-0.178786	-0.1296	-0.112057	0.0103096	-0.387453	-0.31211	-0.0330539	-0.266535	-0.452933	-0.403126	-0.340799	-0.175911	-0.127113	0.0860233	-0.227636	0.417212	-0.481433	-0.839035	-0.645265	0.269242	-0.760649	-0.656852	0.308361	0.0738738	-0.23646	-0.474801	-0.205705	-0.147028	0.253813	-0.382622	0.0276931	-0.26172	-0.490351	0.475888	-0.671396	-0.630797	-1.05497	-0.533434	-1.02417	-1.12581	-0.309827	0.476059
34.5	0.130567	-0.151833	-0.314526	-0.233684	-0.259329	-0.0687255	-0.580316	-0.0153048	-0.158106	-0.282938	-0.299366	-0.552946	-0.416285	-0.306517	0.53478	0.30293	-0.396201	0.391256	-0.47126	-0.975128	-0.723043	0.501876	-0.644012	-0.700681	0.154059	0.0102823	-0.467916	-0.0554685	0.169659	-0.243424	0.119809	-0.232893	-0.345578	-0.0839861	-0.431382	0.258269	-0.841218	-0.59152	-1.01133	-0.448174	-0.977692	-1.02789	-0.358692	0.345782
34.6	0.114002	-0.244167	-0.352553	-0.118462	-0.192101	0.140099	-0.494552	-0.261785	-0.00911131	-0.466705	-0.384554	-0.351962	-0.36963	-0.119015	-0.0469509	0.126862	-0.482704	-0.266608	-0.257433	-1.13271	-0.694531	0.744099	-0.663633	-0.560532	0.14844	0.217361	-0.374827	-0.524906	-0.624532	-0.318218	0.113202	-0.120211	-0.315178	-0.129166	-0.539261	0.133109	-1.00998	-0.639289	-1.32203	-0.480786	-0.998665	-0.769981	-0.390522	0.40286
34.7	0.0368314	-0.0797652	-0.215689	-0.111692	-0.120237	-0.0614249	-0.0358922	-0.192893	0.0807155	-0.355137	-0.0783835	-0.46771	-0.382913	-0.28745	-0.0228564	-0.294837	-0.187842	0.510198	-0.440258	-0.924349	-0.729758	0.918717	-0.598525	-0.79721	0.359445	-0.150421	-0.47611	-0.0629431	-0.508996	0.13392	0.462254	-0.234562	-0.206611	-0.298567	-0.482035	0.185274	-0.733809	-0.605924	-0.672426	-0.489492	-1.1954	-1.01086	-0.668429	0.417328
34.8	-0.0196182	-0.0167926	-0.473508	-0.0664761	-0.0972319	-0.182474	-0.259025	-0.107578	-0.2733	-0.381135	0.030697	0.0491425	-0.403891	-0.148247	-0.319123	0.323101	-0.238565	0.202008	-0.270723	-0.773049	-0.628541	0.388161	-0.688643	-0.554339	0.206555	0.23498	-0.341667	-0.363241	-0.192782	-0.278547	0.423837	-0.404936	0.163098	-0.400853	-0.292374	0.484071	-0.471675	-0.645708	-0.424945	-0.462995	-0.925148	-0.792652	-0.0320733	0.805849
34.9	-0.0178861	-0.128154	-0.397405	-0.16735	-0.0633866	-0.0584641	-0.0701056	-0.235007	-0.0629507	-0.416133	0.131341	-0.19563	-0.393607	-0.20249	0.238661	-0.0461117	-0.403036	0.440442	-0.511829	-0.84584	-0.603067	0.711071	-0.764795	-0.698806	0.287168	-0.3311	-0.36579	-0.407393	-0.190742	0.250386	0.913513	-0.0907492	0.268648	-0.286345	-0.318711	0.370455	-0.827325	-0.805659	-0.529484	-0.419854	-0.682103	-0.647362	-0.646064	1.08899
35	0.0146847	-0.094629	-0.188554	-0.221717	-0.202879	-0.304751	-0.0717044	-0.366289	-0.189461	-0.467122	0.370477	-0.0385996	-0.298179	-0.265059	0.103516	0.0306902	-0.394128	0.323465	-0.33606	-0.95389	-0.433631	0.082066	-0.742922	-0.692897	0.196621	-0.242784	-0.496874	-0.333314	0.138342	0.548628	1.30216	-0.100413	0.441552	-0.39674	-0.196292	0.184373	-0.551856	-0.733287	-0.738386	-0.375894	-0.752493	-0.511238	-0.36751	0.999871
35.1	0.033051	0.0165338	-0.260454	-0.218156	-0.245234	-0.170715	0.395561	-0.484853	0.0206588	-0.369713	0.72078	-0.0338481	-0.405134	-0.250112	-0.191238	0.100731	-0.227904	0.657579	-0.108635	-0.682742	-0.385396	-0.105165	-0.547208	-0.810549	-0.108875	0.0704864	-0.482168	-0.136193	-0.433	0.581804	1.03726	-0.0849524	0.493672	-0.40429	-0.067051	0.103536	-0.42982	-0.838395	-0.455559	-0.40761	-1.08384	-0.444144	-0.340387	1.50574
35.2	0.139646	-0.182648	-0.104559	-0.166556	-0.0521347	0.149104	-0.0263795	-0.634946	0.0924129	-0.427192	0.27252	-0.11942	-0.412699	-0.271969	-0.256598	-0.125502	-0.329851	0.588405	-0.447472	-0.887462	-0.436921	0.289237	-0.586893	-0.694429	0.139445	-0.131902	-0.401339	-0.127913	0.160427	0.520522	0.886548	-0.223146	0.385797	-0.396102	-0.0964761	0.142316	-0.535425	-0.883767	-0.390142	-0.459683	-1.06683	-0.461309	-0.614786	1.12608
35.3	0.121605	-0.141226	-0.498447	-0.114502	-0.331971	-0.453167	0.213622	-0.703625	-0.241759	-0.498513	0.618175	-0.305374	-0.398378	-0.224464	-0.343708	0.0403574	-0.277219	0.624704	-0.463198	-0.753736	-0.321746	0.507001	-0.52458	-0.753374	-0.041803	-0.279024	-0.517178	-0.161212	-0.0826505	0.791708	0.746224	-0.121851	0.242999	-0.31817	-0.100373	0.293444	-0.665864	-0.784641	-0.625858	-0.477146	-0.901301	-0.489663	-0.657178	1.26349
35.4	0.11623	-0.0471483	-0.308763	-0.0861472	-0.418962	-0.0169344	-0.0660288	-0.529983	-0.00587119	-0.44483	0.0232745	-0.274724	-0.40077	-0.158008	-0.344953	0.0851562	-0.376292	0.43757	-0.296385	-0.628355	-0.340043	0.317131	-0.720213	-0.698065	0.221676	-0.219152	-0.527651	-0.255247	-0.141719	0.649584	0.420637	-0.257026	0.517322	-0.45197	-0.122558	0.195236	-0.591795	-0.727107	-0.586728	-0.521756	-0.590265	-0.603693	-0.5015	1.22045
35.5	0.0156075	-0.122381	-0.281159	-0.182809	-0.341585	0.00174049	0.280043	-0.543592	0.0105487	-0.563945	0.411003	-0.451274	-0.311276	-0.338015	-0.0778312	-0.0455608	-0.367596	0.667662	-0.403093	-0.797599	-0.264512	0.52645	-0.540466	-0.665899	0.0381477	-0.146291	-0.403916	-0.11991	-0.399816	0.682797	0.600931	-0.39717	0.500759	-0.116015	0.0226242	0.166653	-0.687651	-0.770913	-0.575569	-0.377011	-0.728267	-0.652706	-0.464288	1.24928
35.6	-0.0218799	-0.134361	-0.346785	-0.120722	-0.18565	0.0473615	0.180981	-0.297027	-0.108807	-0.349791	0.780267	-0.348554	-0.32542	-0.270056	0.0281941	0.146541	-0.328237	0.685283	-0.466689	-0.817828	-0.382109	0.483548	-0.534709	-0.601872	-0.0137691	0.308074	-0.289575	0.501135	-0.243851	0.648769	0.474716	-0.21698	0.498357	-0.47714	0.0333306	0.0681989	-0.592863	-0.851327	-0.58207	-0.430697	-0.601707	-0.258206	-0.0980454	1.04012
35.7	-0.0905221	0.0154826	-0.32668	-0.0886922	-0.171319	0.020776	0.0213435	-0.43151	0.0296995	-0.408861	0.620937	-0.248807	-0.386787	-0.372586	-0.0694296	-0.0822126	-0.162445	0.795513	-0.348781	-0.468244	-0.345258	0.729591	-0.633313	-0.575999	0.269369	-0.00465082	-0.322632	0.300168	0.063016	0.710328	0.417467	-0.228771	0.534624	-0.0858248	0.0379231	0.364359	-0.59501	-0.801838	-0.108482	-0.428292	-0.635625	-0.352666	-0.332181	1.19184
35.8	-0.00621977	-0.0257782	-0.248698	-0.111314	-0.309655	0.00638962	0.203398	0.0510269	-0.00523778	-0.390733	0.674268	-0.238312	-0.305079	-0.225698	-0.118525	0.204477	-0.328991	1.10434	-0.441985	-0.643046	-0.342857	1.17069	-0.328513	-0.788932	0.195143	0.536706	-0.285819	-0.029837	0.0672805	0.359048	0.376172	-0.355736	0.0431671	0.0391781	-0.128086	0.579782	-0.517036	-0.734166	-0.396871	-0.427817	-0.903001	-0.339836	-0.00149568	1.1694
35.9	0.222476	-0.082829	-0.294689	-0.0573574	-0.0232904	0.0822645	0.25985	-0.58965	0.0775327	-0.440184	0.964461	-0.229653	-0.315781	-0.412769	0.152457	0.0187856	-0.469665	0.717963	-0.415605	-0.876364	-0.360407	1.4241	-0.470285	-0.543679	0.14728	0.0972798	-0.202293	0.206381	-0.129771	0.450254	0.515758	-0.167935	0.32023	0.212956	-0.110293	0.52601	-0.514501	-0.636822	-0.0383093	-0.456853	-0.514955	-0.348784	-0.103589	0.977957
36	0.0470069	0.0449209	-0.346634	-0.00736164	-0.165801	0.177315	0.268088	-0.0417591	-0.0424295	-0.48103	0.817786	-0.30814	-0.310917	-0.209513	-0.281909	0.386693	-0.338199	0.49936	-0.46111	-0.403388	-0.324851	2.00401	0.0243231	-0.315401	0.410995	0.479722	-0.154254	0.534387	-0.0896652	0.45647	0.156845	-0.180459	0.454063	0.125831	-0.0542416	0.996966	-0.385504	-0.738804	-0.383046	-0.415735	-0.715698	-0.302826	0.141047	1.29482
36.1	0.255852	-0.0348429	-0.172619	-0.0117174	-0.0545049	0.120336	0.764251	-0.255876	0.0940875	-0.649765	0.542363	0.0392854	-0.206425	-0.199617	0.0918703	0.127659	-0.334345	1.00704	-0.181406	-0.878248	-0.414478	1.46291	-0.193094	-0.479376	0.234435	0.576808	-0.152994	0.745177	0.387949	0.863918	0.335798	-0.155144	0.128766	0.198739	-0.061976	0.7343	-0.27422	-0.65994	-0.140489	-0.359846	-0.864749	-0.185056	-0.158675	1.39071
36.2	0.114734	-0.0608646	-0.199715	-0.0280766	-0.0979997	-0.0554622	0.799017	-0.380645	-0.110918	-0.486226	0.654196	-0.333329	-0.199417	-0.177168	-0.104965	0.563712	-0.307748	1.45895	-0.342069	-0.551302	-0.422855	1.41291	-0.307934	-0.483331	0.243858	0.303004	-0.283554	0.475893	0.215097	0.93223	0.593018	-0.163696	0.329726	0.0801292	0.0585058	0.686538	-0.183991	-0.744588	-0.114714	-0.232651	-1.07987	-0.258422	-0.178613	1.62542
36.3	-0.0505954	-0.091968	-0.372634	-0.0409187	-0.0814015	-0.22453	1.06339	-0.304314	0.134572	-0.528994	0.775996	-0.192593	-0.199626	-0.215743	-0.11089	0.464994	-0.312855	1.37547	-0.245025	-0.744565	-0.410592	2.08326	-0.350528	-0.456862	0.048287	0.335994	-0.17693	0.272806	0.115681	0.729794	0.703679	-0.296862	0.153287	-0.0890721	0.0143626	0.804341	-0.161503	-0.586558	-0.175061	-0.337477	-0.79346	-0.145615	-0.164693	1.66353
36.4	0.0142751	-0.0769385	-0.210242	-0.0906633	-0.112004	0.00882002	0.302422	-0.374535	0.0998259	-0.519257	1.12806	-0.483269	-0.202823	-0.207376	-0.32504	0.348368	-0.286412	0.820277	-0.302384	-0.818551	-0.361293	1.64582	-0.769927	-0.619994	0.110784	0.415683	-0.263416	0.239041	0.0938667	1.10701	0.480819	-0.429781	-0.0422705	-0.119479	-0.0916633	0.95877	-0.275873	-0.578888	-0.344348	-0.209802	-0.706929	-0.0991028	-0.370187	1.54674
36.5	0.233539	-0.177169	-0.360018	0.00646157	0.0382114	0.144371	0.206086	-0.138985	-0.207959	-0.470084	0.278299	-0.196652	-0.245154	-0.156106	-0.273254	-0.11145	-0.341248	0.930754	-0.166081	-0.906209	-0.434246	1.35018	-0.646808	-0.480999	0.0998157	0.431319	-0.396158	-0.128562	0.0805748	0.940009	0.629902	-0.408286	0.135061	-0.0353957	-0.0823615	0.481174	-0.471982	-0.616557	-0.411476	-0.30835	-0.749871	-0.394774	0.40011	1.49015
36.6	0.0875818	-0.191654	-0.369427	-0.177998	-0.0929507	-0.0620505	0.00311759	-0.549135	-0.0240207	-0.570343	0.627219	-0.338932	-0.273296	-0.222832	0.0795507	-0.0740296	-0.311284	1.003	-0.479089	-0.959343	-0.371901	1.3333	-0.322937	-0.460922	-0.0440948	0.37696	-0.283351	-0.0483644	0.392929	0.70165	0.0706357	-0.474005	-0.0539458	-0.128203	0.0823082	0.456101	-0.564709	-0.484724	-0.245027	-0.375665	-0.853961	-0.308376	0.554307	1.23285
36.7	0.152998	-0.177357	-0.211281	-0.0902744	-0.0532976	-0.0902726	-0.412578	-0.618356	-0.0655442	-0.416589	0.160708	-0.304117	-0.293875	-0.286373	-0.0433404	0.00721876	-0.328253	0.906282	-0.202365	-0.819344	-0.403854	1.43363	-0.55247	-0.503257	0.176882	0.263346	-0.271335	-0.381399	0.140329	0.717582	0.188075	-0.301842	-0.269146	-0.247603	-0.0522553	0.223125	-0.429241	-0.574207	-0.479412	-0.384597	-0.722319	-0.480897	0.47367	1.16827
36.8	0.0539763	-0.184285	-0.436633	-0.173036	-0.0657195	0.0459464	0.208745	-0.619455	0.128631	-0.442953	0.30834	-0.143958	-0.220772	-0.348274	-0.584153	0.0355449	-0.410099	0.602989	-0.297192	-0.912682	-0.341108	1.38145	-0.484964	-0.574717	0.0898266	0.0463654	-0.102849	-0.152797	-0.356954	0.498219	0.762607	-0.22491	0.162091	-0.20674	-0.117355	0.369783	-0.544775	-0.542587	-0.674958	-0.286304	-0.9675	-0.450015	0.28184	1.35433
36.9	0.158096	-0.138892	-0.356663	-0.176687	0.00805103	-0.0831284	0.582881	-0.410301	-0.130477	-0.494839	0.83144	0.110647	-0.150746	-0.354337	-0.62289	0.451195	-0.355022	1.13992	-0.534974	-0.787965	-0.332162	1.28888	-0.577312	-0.505125	0.0655905	0.291462	-0.105947	-0.462616	0.161082	0.702728	0.324816	-0.334414	0.055827	0.389171	-0.0126217	0.598851	-0.227299	-0.510962	-0.396014	-0.232182	-0.570568	-0.15196	0.163737	1.93648
37	-0.00758509	0.0137427	-0.295655	-0.16903	-0.0778055	-0.0581776	0.586532	-0.473931	-0.100705	-0.47337	0.74304	0.158054	-0.101017	-0.198704	-0.313184	0.224266	-0.409716	1.50998	-0.187855	-0.768132	-0.343681	1.29342	-0.272363	-0.426712	0.178989	-0.0660702	-0.104017	-0.020346	0.139581	0.521467	0.586672	-0.503794	0.311466	-0.00517597	0.0929177	0.539839	-0.075117	-0.553759	-0.100996	-0.196675	-0.665419	0.111233	0.0928187	1.93952
37.1	0.145216	0.0313469	-0.272866	-0.202143	-0.423274	-0.116262	0.595632	-0.526781	-0.231323	-0.430586	0.877407	-0.0207204	-0.0906252	-0.194889	0.0036406	0.381521	-0.378399	1.60979	0.0196053	-0.767554	-0.087654	1.48537	-0.523612	-0.710592	-0.0412537	0.0617569	-0.109627	-0.405037	0.336239	0.458239	0.0137219	-0.310944	0.186559	0.122628	0.241299	0.198501	-0.276748	-0.639202	-0.201436	-0.271534	-0.545511	1.24806	0.0611212	2.3237
37.2	-0.0694067	0.0741687	-0.313461	-0.316771	-0.299981	0.107025	0.304944	-0.592629	-0.151958	0.19578	0.650281	-0.2427	-0.185656	-0.210018	-0.111985	0.516112	-0.313138	1.52348	0.0856747	-0.672819	-0.157534	1.63958	-0.771343	-0.643547	0.103539	0.132096	0.0153146	-0.416013	0.314807	0.270384	0.178732	-0.183641	0.33788	0.366656	0.350932	0.26916	0.126238	-0.769435	0.0237071	-0.334204	-0.654144	2.3271	-0.00164147	2.43972
37.3	-0.0360316	0.0644977	-0.270372	-0.17911	-0.252976	-0.176905	0.309747	-0.548146	-0.210744	0.407437	0.90462	0.115922	-0.115455	-0.258466	-0.0545693	-0.0417082	-0.325354	1.43457	0.219383	-0.603669	-0.191217	1.10851	-0.544883	-0.728303	-0.0386398	0.233505	0.0939763	-0.78378	0.258495	0.425455	0.132915	-0.160806	0.223775	0.167487	0.106666	0.162909	-0.0702284	-0.661827	-0.388697	-0.443097	-0.705393	2.07229	0.105386	2.3479
37.4	0.109067	-0.00200873	-0.196779	-0.151941	-0.475005	0.00247745	0.392548	-0.183912	-0.178254	0.56138	0.412109	-0.243123	-0.174209	-0.113756	-0.131573	-0.112416	-0.279213	0.940949	0.197815	-0.963503	-0.212299	1.03904	-0.616287	-0.735772	0.239981	-0.311695	0.132524	-0.322687	-0.074192	0.0360888	0.161817	-0.119004	0.0218599	0.0332059	0.177401	0.012169	-0.148112	-0.523037	-0.283562	-0.419117	-0.675348	2.18803	0.394266	2.01855
37.5	-0.0639036	0.111073	-0.214098	-0.203859	-0.521395	0.00159153	0.232793	-0.315573	-0.161352	0.225965	0.611709	-0.0449676	-0.27171	-0.231138	0.0894437	0.18318	-0.362309	1.48902	0.303331	-0.99412	-0.261715	1.02071	-0.629273	-0.755874	0.0574631	-0.0361307	-0.0261913	-0.723876	-0.210262	0.315232	-0.0869363	0.0607942	-0.2279	0.250882	0.111926	0.0921169	-0.12605	-0.543153	-0.392918	-0.400572	-0.681445	3.44882	0.0174945	2.19159
37.6	-0.112305	-0.0541943	-0.133512	-0.259491	-0.637507	-0.157831	0.0546776	-0.194794	-0.265665	0.182656	0.321358	-0.040608	-0.237377	-0.251734	-0.106013	0.0586128	-0.301818	0.983094	0.0560821	-0.97655	-0.297421	0.953964	-0.422459	-1.09642	0.324245	0.22411	0.0395008	-0.877404	-0.177004	0.0296778	-0.107446	0.0288117	-0.0185339	0.0899078	0.0401318	0.240941	-0.166546	-0.655326	-0.869743	-0.439906	-1.06466	3.49237	-0.00842329	2.02535
37.7	-0.0223784	-0.0763619	-0.250004	-0.137473	-0.726895	-0.0895094	-0.0921438	-0.462133	-0.171838	0.262997	0.361659	-0.299831	-0.273757	-0.209804	-0.308595	0.453352	-0.363969	0.658171	0.0332533	-0.859159	-0.313001	0.847638	-0.778801	-0.757211	0.207901	-0.295866	-0.141478	-0.573672	-0.0966225	0.360655	0.0511119	-0.00995488	0.031338	0.0920555	-0.0617027	-0.0607902	-0.00688676	-0.616429	-0.92194	-0.563574	-0.670114	3.16887	-0.241305	1.90536
37.8	0.00700862	0.0132343	0.00210623	-0.220044	-0.496735	-0.0627836	0.477727	-0.0925901	-0.129937	0.488805	0.0731736	-0.411853	-0.307096	-0.199711	0.12611	0.461129	-0.321352	0.567059	0.38455	-1.05336	-0.532032	0.705859	-0.342352	-0.800089	-0.0134472	0.0101395	-0.113314	-0.74873	-0.170601	-0.195379	-0.107208	-0.126362	-0.102984	0.294089	-0.0564767	-0.180525	0.101206	-0.597895	-0.0596113	-0.619143	-0.483309	3.6855	-0.507211	1.54782
37.9	-0.0487063	0.0135157	-0.125009	-0.0973127	-0.427884	-0.0047432	0.560966	0.1036	0.041894	1.14646	0.201268	-0.155513	-0.306984	-0.368526	0.138692	0.197573	-0.476242	0.0338985	0.474377	-0.579272	-0.410673	0.671102	-0.599715	-1.05041	0.130967	0.0984827	-0.0704395	-0.716169	-0.382013	0.136671	-0.0555324	-0.0864902	-0.112465	0.492311	-0.029945	-0.194441	-0.22673	-0.679941	-0.712045	-0.60125	-1.26903	4.17337	-0.235452	1.65198
38	0.0172209	-0.0186696	-0.227601	0.07899	-0.48368	-0.163486	0.0582748	-0.0835595	-0.0812683	1.11818	0.0736495	-0.34315	-0.290824	-0.274438	-0.239392	0.0239781	-0.459885	0.203249	1.01251	-0.870741	-0.34782	0.690989	-0.674221	-0.834867	0.228115	0.154752	0.148981	-0.910112	0.159504	-0.0358036	-0.265917	-0.15082	0.109136	0.823113	-0.0533376	-0.311328	0.0242578	-0.6026	-0.693763	-0.524189	-0.635339	3.64245	-0.113337	1.55407
38.1	-0.0183359	0.0427194	-0.130757	0.30387	-0.346962	-0.034496	0.354046	-0.266729	-0.136191	0.962119	-0.0962399	-0.399963	-0.363172	-0.309608	-0.0269167	0.589766	-0.46367	0.381967	1.64786	-0.921958	-0.327162	0.650142	-0.528608	-0.921374	0.155077	0.486698	0.417109	-1.012	-0.1229	-0.257193	0.0873046	-0.325891	0.00864402	1.56957	0.0808812	-0.0843535	-0.287095	-0.543597	-0.685761	-0.519473	-0.953831	4.30026	-0.2935	1.66464
38.2	0.00183559	0.11625	-0.187812	0.32387	-0.314441	-0.0714272	1.00079	-0.218056	0.110777	0.943563	0.366498	-0.455153	-0.336503	-0.110465	-0.0999339	0.52451	-0.486612	0.565434	1.92024	-0.783456	-0.272901	0.598264	-0.361707	-0.6567	0.144162	0.0740866	0.671142	-1.14062	-0.2516	-0.360665	0.00431916	-0.155689	0.144992	2.06799	0.152677	0.0865759	-0.0975068	-0.599038	-0.699837	-0.476387	-0.627155	4.48395	-0.553096	1.39119
38.3	0.0469493	0.0130072	-0.200714	0.360145	-0.416947	0.0161112	0.51354	-0.0799834	-0.0323705	0.860064	0.239322	-0.685662	-0.315244	-0.158765	0.0925533	0.539712	-0.598461	-0.102073	1.84777	-0.428525	-0.204868	0.411006	-0.544671	-0.700332	0.346249	0.104317	0.567084	-1.05245	-0.185535	-0.254261	0.182332	-0.150743	0.239969	2.03678	0.252788	-0.047699	-0.0582694	-0.656896	-0.59268	-0.577098	-0.708586	4.04242	-0.217406	1.34974
38.4	-0.0901872	-0.0721224	-0.220223	0.194875	-0.36353	0.1842	1.0195	-0.543196	-0.141485	0.487991	-0.0844121	-0.449131	-0.292823	-0.17902	-0.25709	0.680288	-0.433714	0.236088	1.75524	-0.887375	-0.227263	0.421307	-0.448821	-0.763983	-0.0711445	0.284839	0.492912	-1.32245	0.0815617	-0.0189653	-0.231184	-0.168581	0.146316	1.69801	0.221991	0.133205	-0.277275	-0.62457	-0.678818	-0.432052	-0.690884	3.97417	-0.440659	1.23089
38.5	0.00879871	-0.0888188	-0.254692	0.223638	-0.498381	-0.112163	0.954159	-0.417121	-0.084257	0.405317	0.0137633	-0.190638	-0.352403	-0.180663	0.150785	0.856902	-0.498115	0.397961	1.85673	-0.692159	-0.182187	0.539994	-0.433708	-0.742592	0.0297217	0.389811	0.654159	-0.89506	-0.109085	-0.33073	0.187496	-0.0825738	0.125425	1.80431	0.162888	0.102112	-0.058843	-0.68762	-0.949504	-0.587789	-0.456285	3.79827	0.0604538	1.16394
38.6	0.00986062	0.0277279	-0.211204	0.225588	-0.401898	-0.0107408	0.215692	-0.166463	-0.257195	0.412088	-0.00622888	-0.418727	-0.340746	-0.249157	0.0719638	0.419977	-0.396553	-0.0210235	1.68263	-0.649637	-0.307094	0.438511	-0.56311	-0.667038	0.100252	0.6586	1.09906	-0.978594	-0.447798	-0.539728	-0.180083	-0.228721	-0.141031	1.77436	0.237932	0.172886	-0.131085	-0.698802	-0.897078	-0.550693	-0.743816	3.1092	-0.207115	1.35214
38.7	0.0212317	-0.160742	-0.320031	0.153279	-0.339896	0.366323	0.327062	-0.217941	-0.0839527	0.313312	0.152863	-0.47986	-0.325677	-0.210633	-0.437913	0.350467	-0.529009	-0.126196	1.66433	-1.02289	-0.22921	0.574837	-0.249374	-0.591493	0.209947	1.19465	0.956929	-0.7887	-0.0604091	-0.0666368	-0.024589	-0.219809	0.117216	1.45724	0.214139	0.12029	-0.371047	-0.758141	-0.713737	-0.355543	-0.668145	2.91954	0.0307774	1.41571
38.8	-0.0362557	-0.227803	-0.371477	0.127545	-0.175156	0.0103488	0.377986	-0.193797	-0.140561	0.183828	-0.0594979	-0.405921	-0.264781	-0.211047	0.108287	0.396669	-0.455472	0.0378098	1.55863	-0.841185	-0.289124	0.470108	-0.465478	-0.739048	0.305012	0.882799	0.912217	-1.27001	-0.390115	-0.3852	-0.100699	-0.0436962	-0.06659	1.51473	0.0724493	0.0336677	-0.553787	-0.633757	-1.14311	-0.403188	-0.806623	2.57542	-0.443822	1.18302
38.9	-0.00917795	-0.0851253	-0.241895	-0.0517208	-0.396023	0.0720638	0.312765	-0.594618	-0.077452	0.16807	0.0484173	-0.430462	-0.32157	-0.200386	0.331128	0.577562	-0.440036	0.348887	1.18665	-0.956808	-0.359942	0.501913	-0.52553	-0.649927	0.173215	1.22426	0.68636	-1.06557	-0.235978	-0.219083	-0.0578347	-0.277313	-0.0921605	1.39248	0.0639672	-0.0206874	-0.478742	-0.690768	-1.0943	-0.46891	-1.0982	2.19349	-0.528434	1.05784
39	-0.0673245	-0.0720899	-0.363322	0.0560626	-0.35287	0.174299	0.0422872	-0.123085	-0.142128	0.221669	0.0636997	-0.0121971	-0.290611	-0.329099	0.0209403	0.170593	-0.390748	0.339659	1.29146	-0.797399	-0.377076	0.420115	-0.71001	-0.675265	0.354459	0.492173	0.750842	-1.08726	-0.025289	-0.384807	-0.554669	-0.320668	-0.038605	1.40636	-0.0468258	0.0647902	-0.508704	-0.665647	-0.940714	-0.38299	-1.21104	1.77621	-0.261554	0.943238
39.1	-0.0303642	-0.206479	-0.105201	-0.108813	-0.329092	-0.0348488	0.250956	-0.142025	-0.202402	-0.141389	0.0408907	-0.39625	-0.302909	-0.264259	-0.150215	0.335932	-0.408404	0.156173	1.12811	-0.969894	-0.430802	0.198573	-0.356303	-0.713664	0.00602256	0.580727	0.630843	-1.26598	-0.271045	-0.320311	-0.322246	-0.160677	-0.0759853	1.01118	-0.064475	0.20624	-0.661022	-0.712524	-0.89197	-0.484542	-1.05799	1.67341	-0.286079	0.868601
39.2	-0.0109074	-0.122123	-0.382804	-0.00512906	-0.297962	-0.180876	-0.160865	-0.201936	-0.150718	-0.0194246	0.111408	-0.528494	-0.34001	-0.362371	-0.262992	0.0876634	-0.381569	0.172686	1.03632	-0.918708	-0.513431	0.163654	-0.709472	-0.599116	0.216497	0.553039	0.383104	-0.843513	-0.154942	-0.310888	-0.0122485	-0.4919	-0.293209	1.01409	-0.0290865	0.607699	-0.823736	-0.805782	-0.700295	-0.367516	-0.794002	1.53016	0.0673253	0.654349
39.3	0.0453848	-0.0594033	-0.41903	0.0499219	-0.234165	0.283439	0.179736	-0.154213	-0.0567045	-0.134024	-0.263214	-0.235675	-0.296882	-0.267264	-0.187302	0.308713	-0.238115	0.243213	1.09577	-1.05895	-0.457967	0.214196	-0.55645	-0.776498	0.230149	0.640987	0.215853	-0.916745	-0.172416	-0.18854	-0.780805	-0.405641	-0.00805169	1.06702	-0.337501	0.392167	-0.740979	-0.768335	-0.654671	-0.391913	-0.998013	1.32242	-0.212788	0.523388
39.4	0.0638513	-0.147436	-0.386587	-0.119845	-0.230518	0.022932	-0.190044	-0.406891	-0.0817283	-0.171813	0.123307	-0.0614523	-0.343864	-0.253223	0.105276	0.226355	-0.477331	0.500676	0.906868	-0.954748	-0.577282	0.0278156	-0.760477	-0.604665	0.170003	0.410274	0.316611	-1.03307	-0.399022	-0.194494	-0.178425	-0.230868	-0.189525	0.953283	-0.200057	0.41505	-0.604495	-0.736445	-0.598093	-0.499163	-0.901924	0.914077	0.341463	0.598673
39.5	-0.0454658	-0.189102	-0.440538	-0.0458419	-0.123251	0.0222656	-0.00418875	-0.136476	-0.147024	-0.22691	0.00936203	-0.414434	-0.330668	-0.241422	-0.0971501	-0.103793	-0.421864	0.405889	0.955026	-1.07103	-0.673704	0.422208	-0.450567	-0.575898	0.23918	0.233773	0.257899	-0.716009	-0.303827	-0.267677	-0.621553	-0.552947	-0.207155	0.643851	-0.222676	0.38851	-0.87276	-0.716638	-0.911758	-0.447839	-1.075	0.682254	0.220822	0.654347
39.6	-0.0187678	-0.166354	-0.262118	0.0152955	-0.211174	0.233486	-0.213213	-0.167555	-0.137288	-0.309752	0.188245	-0.261556	-0.295149	-0.190068	-0.103746	0.709208	-0.432876	0.168929	0.976121	-1.00516	-0.58526	0.441451	-0.657026	-0.534767	0.263469	0.374827	0.255805	-0.880504	-0.0268966	-0.253333	-0.551831	-0.514013	-0.255626	0.834967	-0.389299	0.404895	-0.689516	-0.649312	-1.02013	-0.46039	-0.82101	0.60023	0.189317	0.590227
39.7	-0.00201763	-0.156291	-0.296084	-0.0419831	-0.183449	-0.0862687	-0.588664	-0.143727	0.389508	-0.127074	0.153971	-0.631177	-0.313282	-0.20543	-0.306001	0.692134	-0.504151	-0.335715	0.7068	-0.981635	-0.460233	0.593468	-0.636558	-0.67894	0.342921	0.0177084	0.515224	-0.837811	-0.407933	-0.594988	0.33372	-0.611197	-0.297423	0.552418	-0.265707	0.344259	-0.733153	-0.693175	-1.16376	-0.486276	-1.03265	0.261397	0.428847	0.602421
39.8	0.00236655	-0.22498	-0.40312	-0.0783494	-0.175503	0.236029	-0.775062	-0.488697	-0.0256374	-0.273788	0.254635	-0.421446	-0.301379	-0.195965	0.193757	0.892375	-0.535026	0.619816	0.702355	-0.92733	-0.499188	0.377027	-0.935565	-0.771999	-0.00436747	0.0139001	0.430753	-0.792736	0.0840794	-0.170288	0.714332	-0.464018	-0.441874	0.706861	-0.155352	0.51768	-0.618315	-0.603059	-0.87256	-0.459298	-0.947868	0.651466	0.256242	0.753718
39.9	0.0823251	-0.221669	-0.348509	-0.0532864	-0.0112029	-0.0724727	-0.57108	-0.177657	0.17635	-0.337275	0.652143	-0.227265	-0.304727	-0.259125	-0.15613	0.951846	-0.473174	-0.0359084	0.571013	-1.32317	-0.570683	0.498157	-0.344774	-0.531664	-0.101243	0.357672	0.382171	-1.16413	-0.0516291	-0.47135	0.806954	-0.611681	-0.213276	0.458251	-0.340428	0.721441	-0.515841	-0.674987	-0.603682	-0.416592	-1.04461	0.343028	0.205349	0.324017
40	-0.111002	-0.273055	-0.407621	-0.0896433	-0.0791798	0.385287	-0.214503	-0.134957	-0.158751	-0.31323	0.946686	-0.298856	-0.26734	-0.303548	-0.169002	0.56322	-0.467199	0.408857	0.735981	-0.990158	-0.612846	0.722092	-0.452804	-0.63153	-0.29071	0.148567	0.390435	-1.04812	0.0694594	-0.261531	0.94731	-0.528856	0.0218732	0.608737	-0.2948	0.802117	-0.468979	-0.685637	-0.680869	-0.522278	-1.1442	0.166507	0.226636	0.761126
40.1	-0.117317	-0.163949	-0.205448	0.000297405	-0.214663	0.657705	-0.745926	-0.256848	0.064426	-0.210817	1.26192	-0.45587	-0.305095	-0.139456	0.0302927	0.652282	-0.392383	0.822751	0.693288	-1.02412	-0.64216	0.636693	-0.560187	-0.396003	0.112638	-0.0441757	0.320556	-0.312211	0.0729133	-0.112465	0.618392	-0.321155	0.108145	0.763151	-0.38433	1.02509	-0.683085	-0.627764	-0.502856	-0.496325	-1.07781	0.250668	0.185441	0.698637
40.2	0.019283	-0.122444	-0.230885	0.0207889	-0.16307	0.221788	-0.374794	-0.200568	-0.187212	-0.268603	1.13293	-0.0193488	-0.314093	-0.320488	-0.261878	0.491573	-0.365544	0.368459	0.457719	-1.00898	-0.634252	0.580531	-0.488789	-0.794437	0.221222	-0.463817	0.322963	-0.835053	-0.134267	-0.40562	0.793878	-0.555556	0.248546	0.657953	-0.341528	0.850254	-0.590165	-0.648504	-0.472672	-0.42574	-0.834256	0.123712	0.225926	0.633203
40.3	0.135397	-0.202819	-0.245291	-0.00434897	-0.199892	0.35126	-0.822977	-0.107316	0.0411539	-0.325702	1.18274	-0.265452	-0.324406	-0.229741	-0.137605	0.360849	-0.299995	0.213065	0.496745	-1.01564	-0.636491	0.268244	-0.288939	-0.610892	0.186459	-0.034417	0.0455854	-0.561067	-0.206369	-0.506831	1.04442	-0.466356	-0.0687987	0.7529	-0.378064	0.485489	-0.339763	-0.772169	-0.727006	-0.362557	-0.777292	-0.0489348	0.404681	0.508011
40.4	0.136787	-0.11263	-0.436294	-0.0181664	-0.0707466	0.445127	-0.55475	-0.236983	0.127046	-0.387129	1.03257	-0.122275	-0.337964	-0.19058	-0.181401	0.136948	-0.32216	0.224661	0.495379	-0.634652	-0.688088	0.0653044	-0.668419	-0.738317	0.390361	-0.0240396	0.199186	-0.91082	0.0200952	-0.486369	0.648568	-0.373681	0.0294961	0.398754	-0.320135	0.497764	-0.728201	-0.697941	-0.65832	-0.399334	-0.866424	0.0583507	0.307225	0.611782
40.5	-0.116084	-0.251527	-0.151788	-0.157853	-0.0400861	0.477875	-0.20295	-0.48721	-0.206416	-0.167161	1.26161	-0.313764	-0.330362	-0.262071	-0.282543	0.551974	-0.246828	0.182833	0.371877	-0.984576	-0.765895	0.308932	-0.432673	-0.55452	0.160048	-0.147243	0.728402	0.0105141	-0.0322141	-0.226169	0.4614	-0.444935	-0.0448889	0.401614	-0.462918	0.620895	-0.481119	-0.85191	-0.645736	-0.418027	-0.959047	-0.033424	0.217893	0.556723
40.6	0.0806061	-0.166807	-0.0958161	-0.209095	-0.0795603	0.313654	-0.173601	-0.201504	0.18128	-0.202098	1.18883	0.259096	-0.310207	-0.250123	0.0560848	0.459122	-0.453214	0.752355	0.276353	-0.825943	-0.600317	0.497382	-0.429265	-0.657502	0.36925	-0.385139	1.66067	-0.738784	0.036295	-0.00105505	0.127776	-0.726582	0.046207	0.572545	-0.405453	0.783523	-0.507616	-0.698829	-0.403979	-0.345358	-0.600647	-0.100759	0.686237	0.466698
40.7	0.0243017	-0.159467	-0.243198	-0.222628	-0.226069	0.211611	0.177784	-0.209129	-0.0379535	-0.342498	1.956	0.389913	-0.300765	-0.265828	-0.0256849	0.543555	-0.24539	0.566578	0.262122	-0.796573	-0.603727	0.2554	-0.254756	-0.569831	0.143917	0.454783	1.75398	-0.409483	0.243435	-0.0522377	0.489505	-0.426194	0.0310713	0.444299	-0.393611	0.794686	-0.382237	-0.791122	-0.216578	-0.393739	-0.919508	-0.0238614	0.297837	0.593275
40.8	0.00389874	0.0290041	-0.133965	-0.0963958	-0.130647	0.196167	-0.630115	-0.125339	-0.141548	-0.269055	1.80211	0.362145	-0.344002	-0.273333	0.0222177	0.460589	-0.223263	0.628922	0.0927508	-0.965868	-0.701488	0.182289	-0.495581	-0.636156	0.286739	-0.0415099	1.5827	-0.719174	0.308864	0.31426	0.447922	-0.330799	0.0805759	0.262698	-0.43159	0.935142	-0.270262	-0.586723	-0.188435	-0.245844	-0.74982	0.203001	0.436287	0.560351
40.9	-0.119914	-0.0751996	-0.277394	-0.200143	0.0676864	0.378092	-0.0990088	-0.305646	0.11131	-0.236113	2.16818	0.0231206	-0.348246	-0.172489	0.229944	0.463804	-0.23987	0.345998	0.129039	-1.02193	-0.646592	0.162278	0.00815457	-0.753165	0.351281	0.141994	1.30079	-0.193237	-0.0926158	-0.156131	0.530615	-0.301992	0.152341	0.257752	-0.476173	0.707567	-0.474734	-0.682598	-0.677407	-0.385215	-0.717762	-0.126731	0.281875	0.271614
41	-0.0997727	-0.0511715	-0.166576	-0.117142	-0.159055	0.378773	-0.112971	-0.551028	-0.0622152	-0.404478	1.73136	0.272419	-0.328405	-0.258704	-0.0401926	0.507466	-0.296209	0.553058	0.0819652	-0.800726	-0.759429	0.0301032	-0.487621	-0.703811	0.174042	-0.165509	1.30621	-0.776833	0.250357	0.191526	-0.0572822	-0.388077	-0.0697896	0.21891	-0.381913	0.360506	-0.280344	-0.749335	-0.374458	-0.305855	-0.844385	-0.0878803	0.193705	0.507183
41.1	-0.0634805	-0.103295	-0.290141	-0.195203	-0.117936	0.177502	-0.0749019	-0.377602	-0.0942334	-0.49255	1.71804	-0.158518	-0.378857	-0.306749	0.0955105	0.437798	-0.335751	0.270811	0.0650918	-0.918623	-0.743256	0.205656	-0.671919	-0.475178	0.318518	-0.0904954	1.12726	-0.629336	-0.305478	-0.271254	0.33708	-0.54635	-0.154729	0.330774	-0.379095	0.40593	-0.443197	-0.701291	-0.667528	-0.38597	-0.652293	-0.120983	0.25456	0.321108
41.2	-0.111998	-0.0983459	-0.337825	-0.135717	-0.253962	0.295033	-0.519831	-0.456334	-0.0911904	-0.273515	1.32957	-0.0307131	-0.309481	-0.259564	0.113286	0.57012	-0.440988	0.438797	-0.0423556	-0.889551	-0.800374	0.45967	-0.705673	-0.668094	0.150144	-0.159891	1.09992	-0.534217	-0.361103	-0.157757	-0.0902516	-0.453228	0.0666422	0.439887	-0.426969	0.662512	-0.447872	-0.71912	-1.00328	-0.313207	-0.963665	-0.09707	0.0760212	0.345696
41.3	-0.0700119	-0.165837	-0.0863271	-0.058408	0.00806816	0.563161	-0.0510005	-0.46037	-0.167935	-0.47142	1.41727	-0.0440859	-0.360313	-0.416232	0.062923	0.132312	-0.331789	0.0938085	0.162779	-1.15068	-0.735455	0.320938	-0.766825	-0.581778	0.264585	0.0918092	1.1398	-0.837539	-0.0936138	-0.133498	-0.0953969	-0.566488	-0.273051	0.358599	-0.622428	0.681486	-0.545714	-0.785948	-0.856996	-0.335405	-1.08834	-0.695969	0.640085	0.158795
41.4	-0.0228208	-0.179652	-0.17453	-0.188257	-0.0493254	0.327915	-0.290375	-0.271101	-0.290014	-0.249711	1.42033	-0.470367	-0.32784	-0.262452	0.1336	0.355521	-0.370391	-0.10952	0.0273757	-1.15741	-0.777891	0.239675	-0.53877	-0.693296	0.215194	-0.0849544	0.95102	-0.92815	-0.154075	0.0853254	0.257407	-0.396231	-0.259753	0.179891	-0.43842	0.259443	-0.403798	-0.558624	-0.838884	-0.543678	-0.754815	-0.507469	0.404175	0.210808
41.5	-0.00019721	-0.106401	-0.311261	-0.135362	0.111989	0.512706	-0.00879318	-0.166188	-0.338034	-0.464426	1.42366	0.268794	-0.288865	-0.288777	-0.184958	0.261918	-0.30676	0.189007	-0.0483896	-1.04061	-0.737203	-0.0945092	-0.34463	-0.810726	0.0823607	-0.126907	0.846906	-0.678642	-0.163131	-0.125284	-0.0572822	-0.487229	-0.239887	0.0722506	-0.47558	0.464758	-0.599943	-0.818448	-0.841739	-0.401842	-0.956787	-0.401615	0.464791	0.138455
41.6	0.062105	-0.108054	-0.337972	-0.220821	-0.0259531	0.231191	-0.16424	-0.139852	-0.349773	-0.29796	0.996225	-0.0963604	-0.322394	-0.354924	0.00483588	0.105043	-0.361986	0.294947	-0.0707359	-0.770651	-0.756302	0.461089	-0.58683	-0.815029	0.150318	0.318504	0.815132	-0.405751	-0.0520619	0.143546	0.337919	-0.375355	-0.484927	0.255245	-0.465673	0.67454	-0.599924	-0.662846	-0.52823	-0.382725	-0.765458	-0.381343	0.522487	0.317234
41.7	-0.0478158	-0.002762	-0.233624	-0.0604783	0.0258133	0.504477	-0.0544378	-0.246655	-0.349	-0.393221	0.744547	0.1188	-0.352947	-0.237529	-0.327049	0.0113558	-0.451784	0.401313	-0.0551643	-1.04736	-0.788862	0.36643	-0.771331	-0.774358	0.188135	-0.145071	0.593084	-0.653834	-0.204274	-0.00767025	-0.215737	-0.390357	-0.462108	-0.00629079	-0.448667	0.843415	-0.75873	-0.741535	-1.04283	-0.303212	-0.958722	-0.558411	0.221961	0.263632
41.8	-0.128593	-0.0699345	-0.149549	-0.0931249	-0.0549729	0.139585	-0.5841	-0.318794	-0.346949	-0.311933	1.13619	0.181785	-0.324854	-0.322042	-0.629008	0.527326	-0.31148	0.00242289	-0.181494	-0.963575	-0.78368	0.400037	-0.67115	-0.624167	0.181453	-0.238055	0.628949	-0.518241	-0.372229	-0.160011	-0.0975611	-0.345544	-0.509893	0.0284679	-0.412029	0.409462	-0.574032	-0.700371	-0.971842	-0.39568	-0.640633	-0.469884	0.290141	0.142394
41.9	0.0469373	0.00128892	-0.157598	-0.0766303	0.106956	0.0645778	-0.479165	-0.442945	-0.234933	-0.271857	0.317312	0.233578	-0.331037	-0.258395	-0.0724903	0.0202631	-0.299735	0.173169	-0.125618	-0.837569	-0.706616	0.583081	-0.343559	-0.716685	0.135233	-0.111012	0.451214	-0.543089	-0.323248	-0.00747607	0.247235	-0.519747	-0.282724	-0.0992664	-0.664888	0.488145	-0.439281	-0.746613	-0.89248	-0.39153	-0.790199	-0.907659	-0.131153	0.268615
42	0.077472	-0.0849624	-0.275334	-0.131327	0.00894178	0.42471	-0.580422	-0.586871	-0.162098	-0.346297	0.771349	0.148445	-0.33092	-0.333289	-0.10211	0.232665	-0.423437	0.541975	-0.192852	-0.923284	-0.720878	0.916121	-0.306911	-0.883682	0.11068	-0.18092	0.133219	-0.65021	-0.168117	-0.0366687	-0.289133	-0.629639	-0.444382	0.0995463	-0.401033	0.408795	-0.63242	-0.770345	-0.441087	-0.431377	-0.567633	-0.5919	-0.17095	0.309437
42.1	0.0455928	-0.111706	-0.256492	-0.0354486	-0.162476	0.307451	-0.196568	-0.50316	-0.108512	-0.376804	0.709609	0.0321337	-0.308767	-0.163133	-0.105661	-0.0282417	-0.34842	0.212347	-0.224829	-0.929146	-0.725336	0.680176	-0.542519	-0.501048	0.251208	-0.0307992	0.2652	-0.697823	-0.436425	-0.304149	-0.467389	-0.489824	-0.365742	-0.0223363	-0.327286	0.193827	-0.563615	-0.761257	-1.33268	-0.374109	-0.96152	-0.464453	-0.452984	0.115125
42.2	-0.189646	-0.134899	-0.277515	-0.15346	-0.188703	0.278827	-0.363994	-0.0162568	-0.250056	-0.381891	-0.00667646	-0.110843	-0.264818	-0.0516988	-0.178705	0.34381	-0.371277	-0.0625605	-0.127555	-1.0548	-0.422104	0.694211	-0.661979	-0.494772	0.25646	-0.0366544	0.249361	-0.824769	-0.0881046	-0.0870607	-0.54208	-0.527919	-0.365338	0.109856	-0.0491202	0.487232	-0.524766	-0.722837	-0.804791	-0.129789	-0.694947	-0.390523	-0.312895	0.406737
42.3	-0.00113321	-0.0138397	-0.246189	-0.196416	-0.242448	0.581245	-0.349888	-0.244618	-0.03259	-0.329658	0.403615	0.248391	-0.187933	-0.0917789	-0.180012	0.345453	-0.443692	0.707937	-0.338473	-0.776649	-0.343747	0.636551	-0.430572	-0.528083	0.00903383	-0.276452	0.363707	-0.770947	0.0478574	-0.186639	-0.224256	-0.454674	-0.144924	0.0264771	0.0268795	0.33131	-0.554675	-0.832586	-0.489374	2.53375e-05	-0.724685	-0.325399	-0.0545397	0.59831
42.4	0.0359448	-0.130262	-0.259716	-0.177978	-0.0998473	0.884805	-0.336398	-0.458835	-0.129918	-0.268228	0.333411	0.163184	-0.109266	0.0610799	0.0218071	-0.0966378	-0.497266	0.380613	-0.190508	-1.24481	-0.212405	0.623943	-0.147972	-0.455455	0.0663569	-0.338523	0.390679	-0.902152	0.143978	-0.260968	-0.459931	-0.350498	-0.531642	-0.0832284	0.0892877	0.594711	-0.615126	-0.747703	-0.370584	0.269254	-0.587346	-0.342022	0.11536	0.693215
42.5	0.056101	-0.121291	-0.350532	-0.162888	-0.228979	0.848845	-0.293863	-0.327949	-0.0476059	-0.223628	0.0750415	0.0152831	-0.104888	-0.00988131	-0.0712417	0.640641	-0.526918	0.371881	-0.00276622	-1.01366	-0.397	0.212108	-0.0458448	-0.669475	-0.0833693	-0.174689	0.520051	-1.3108	-0.126237	-0.317139	-0.11708	-0.399075	-0.488053	-0.214629	0.122227	0.318878	-0.422174	-0.729355	-0.196634	0.441021	-0.760719	-0.367353	-0.105423	0.425298
42.6	-0.0789106	-0.0304362	-0.230926	-0.221434	-0.126926	0.920308	0.0850796	-0.216874	-0.00275288	-0.198502	-0.0147703	-0.0564083	-0.0887378	-0.0312545	0.0296996	0.362088	-0.417705	0.626845	-0.333725	-0.862501	-0.396542	-0.0397714	-0.0968998	-0.585787	0.079763	-0.450102	0.693399	-1.0018	0.193656	0.294431	-0.219298	-0.297789	-0.324811	0.0225354	0.0331142	0.144414	-0.319903	-0.776276	-0.185338	0.391101	-0.629426	-0.452223	0.0722642	0.797349
42.7	0.127513	-0.0797632	-0.132855	-0.110689	-0.155869	0.836423	-0.108449	-0.272658	-0.140133	-0.212984	-0.0664083	0.153762	-0.105758	-0.0823479	-0.229253	0.0101738	-0.421534	0.752072	-0.118144	-0.793569	-0.391801	-0.129598	-0.129827	-0.525316	0.0940617	-0.418932	0.568672	-0.93456	-0.190608	-0.085982	-0.499756	-0.230045	-0.388074	-0.119068	0.0590944	-0.0333973	-0.514657	-0.61516	-0.384708	0.386007	-0.613855	-0.475401	-0.11444	0.761234
42.8	0.0376051	-0.155344	-0.302333	-0.282099	-0.404542	0.588342	-0.665064	-0.371334	-0.0213166	-0.190332	-0.0811003	0.111117	-0.120289	-0.0535866	-0.226387	0.233328	-0.509156	0.399855	-0.0437551	-0.662458	-0.518772	-0.086323	-0.358361	-0.458573	0.339908	-0.612358	0.697516	-0.400709	-0.223821	-0.229925	-0.497454	-0.461685	-0.187703	-0.00229335	0.0526126	0.19206	-0.412434	-0.668746	-0.302944	0.422423	-0.766856	-0.438577	-0.257099	0.657071
42.9	0.110052	-0.167191	-0.19573	-0.0982078	-0.0632734	0.573329	-0.474318	-0.0432193	-0.114537	-0.186921	0.0361426	0.342233	-0.117041	-0.0718191	-0.176875	-0.0507802	-0.426554	-0.285833	-0.185999	-0.855669	-0.535806	0.0193947	-0.634148	-0.567656	-0.108713	-0.359222	0.564385	-0.196876	-0.446492	-0.195294	-0.242303	-0.41975	-0.330955	0.0676197	0.00369947	0.0876265	-0.352174	-0.780525	-0.728295	0.292595	-0.654712	-0.756752	-0.0560937	0.821753
43	-0.0221753	-0.120021	-0.266644	-0.160864	-0.0882775	0.903582	-0.242099	-0.34689	0.103308	-0.136254	0.21355	0.585846	-0.191841	-0.122517	0.0323913	0.0877799	-0.468628	0.338267	-0.270236	-0.732291	-0.515014	0.383971	-0.202474	-0.656629	0.230897	-0.418154	0.401365	-0.5508	-0.245011	-0.249455	-0.294677	-0.267353	-0.0846711	-0.0743051	-0.143453	0.503645	-0.487981	-0.714156	-0.589925	0.124302	-0.429609	-0.607464	0.060754	0.805828
43.1	-0.0400763	-0.155784	-0.381354	-0.203336	-0.160034	0.650025	-0.380095	-0.00688349	-0.0432001	-0.343252	0.220247	0.319442	-0.107911	-0.108813	0.174787	0.227943	-0.421821	0.81673	-0.185314	-0.959736	-0.367965	0.572138	-0.291548	-0.723776	0.0693794	-0.171473	0.437942	-0.4712	-0.00902735	-0.134619	-0.402446	-0.211163	0.0252403	0.00919731	-0.0120777	0.733021	-0.543102	-0.742431	-0.160749	0.242157	-0.368814	-0.809499	0.443716	0.922424
43.2	0.113932	-0.140055	-0.394125	-0.140745	-0.230101	0.718174	-0.310534	-0.585405	0.0184175	-0.304602	0.798684	0.404277	-0.196088	-0.25004	-0.298961	0.37352	-0.507457	0.974357	-0.234855	-0.879496	-0.466008	1.40535	-0.344853	-0.50192	0.16905	-0.153989	0.382154	-0.39017	0.0209608	0.0228166	-0.532758	-0.235234	-0.0841656	0.430702	-0.0316404	1.74911	-0.558322	-0.694264	-0.345387	0.159057	-0.101896	-0.469776	0.103224	0.710393
43.3	-0.0886542	-0.12854	-0.259575	-0.207004	0.0540108	0.636166	-0.352598	-0.309424	0.0675005	-0.372764	0.376489	0.424363	-0.244356	-0.105096	-0.114324	0.240591	-0.404527	1.32115	-0.286085	-0.868102	-0.410873	1.16952	-0.490442	-0.679901	0.212535	-0.0387489	0.280872	-0.549248	-0.0215791	-0.214683	0.217603	-0.16606	-0.200278	0.204262	-0.116541	1.96151	-0.601943	-0.783285	-0.566929	0.0289752	-0.232156	-0.613387	0.577409	0.9798
43.4	-0.0229959	0.0193304	-0.41189	-0.134077	-0.228611	0.335506	-0.459553	-0.45213	0.0199523	-0.362992	0.115925	0.326895	-0.209507	-0.268931	-0.358237	0.251843	-0.424539	0.789097	-0.442033	-0.756235	-0.508677	1.30643	-0.888697	-0.573862	0.183707	0.00441757	0.187461	-0.330263	-0.049836	-0.0828845	-0.441644	-0.35995	-0.137558	-0.101835	-0.124459	1.72283	-0.638931	-0.82807	-0.306163	0.0298814	-0.297727	-0.761403	0.359473	0.678965
43.5	-0.103129	-0.0978965	-0.439308	-0.130969	-0.0347804	0.388983	-0.734009	-0.637499	0.0105974	-0.316041	0.411369	0.191354	-0.230826	-0.277334	-0.213823	-0.0524359	-0.517528	0.122078	-0.308628	-0.748541	-0.516814	1.22407	-0.589778	-0.63296	0.146613	-0.178243	0.115513	-0.42877	-0.104715	-0.245161	-0.305326	-0.334946	-0.229165	0.213423	-0.191664	1.73959	-0.674462	-0.752484	-0.280841	-0.102767	-0.298284	-0.847133	0.183247	0.452087
43.6	0.0647217	-0.0430783	-0.30742	-0.0559564	-0.158142	0.541915	-0.663171	-0.644135	-0.0285369	-0.281424	0.440111	0.0819174	-0.272955	-0.319795	0.0298365	-0.0483372	-0.408614	0.542558	-0.382777	-0.963193	-0.557368	1.36402	-0.497483	-0.538156	0.0889166	-0.0576069	-0.0910858	-0.892679	0.0816303	-0.357654	-0.489799	-0.368509	-0.328709	-0.0910629	-0.0303378	1.7765	-0.73516	-0.773393	-0.41273	-0.0852891	-0.484287	-0.651062	-0.0203563	0.484715
43.7	0.0857388	-0.0406157	-0.299433	-0.106847	-0.266396	0.297192	-0.630472	-0.490566	-0.261413	-0.416244	0.120367	-0.457736	-0.327209	-0.33744	0.0336687	0.0238514	-0.483509	0.588564	-0.221348	-0.657871	-0.504896	1.45015	-0.371843	-0.683362	0.374688	-0.224404	-0.131901	-0.163753	-0.111217	-0.0106477	-0.436731	-0.182524	-0.228452	0.069587	-0.0414155	1.53834	-0.770292	-0.755088	-0.530452	-0.246504	-0.338614	-0.971645	0.235876	0.33596
43.8	-0.0853459	-0.136532	-0.514771	-0.0657898	-0.0932092	0.346919	-0.358148	-0.433848	-0.193049	-0.452239	-0.13299	0.258315	-0.321578	-0.259973	-0.0730998	0.0934037	-0.506452	0.775923	-0.35382	-0.850326	-0.472757	1.38492	-0.331701	-0.550657	0.471571	-0.524442	-0.181936	-0.554381	-0.369699	-0.013075	-0.49269	-0.242724	-0.371435	-0.147694	-0.0585653	1.41708	-0.795822	-0.768565	-0.757005	-0.218526	-0.67185	-0.971261	0.0341251	0.576175
43.9	-0.0174412	-0.108769	-0.478042	-0.00407209	-0.0823639	0.20874	-0.40496	-0.256352	-0.0348574	-0.497695	-0.206613	-0.226694	-0.267663	-0.131013	-0.14857	0.140608	-0.197839	0.294607	-0.30082	-1.02482	-0.331386	1.52347	-0.699959	-0.839995	0.0667037	-0.119698	-0.0881681	-0.425418	-0.0377789	-0.270636	-0.269408	-0.313345	-0.325591	-0.100975	0.0908522	1.27954	-0.703226	-0.753279	-0.484493	-0.277517	-0.54605	-0.820038	0.0298055	0.483456
44	-0.0520656	-0.117841	-0.307479	-0.109128	-0.272915	0.157736	-0.336521	-0.381475	0.109311	-0.379176	-0.067067	-0.36476	-0.300971	-0.226294	-0.0713434	0.319648	-0.473352	0.688798	-0.505741	-0.723365	-0.382072	1.55403	-0.543128	-0.554368	0.175877	-0.590791	-0.0708163	-0.561902	-0.640402	0.0963923	-0.427539	-0.495731	-0.318303	-0.18573	0.188133	1.03884	-0.871508	-0.764395	-0.452941	-0.297129	-0.652201	-0.711069	-0.0536175	0.520303
44.1	0.0774019	-0.0525373	-0.424442	-0.0667212	-0.120153	0.180889	-0.66198	-0.550229	0.491843	-0.334989	-0.0642338	-0.150226	-0.368948	-0.175932	-0.432947	0.148464	-0.336515	0.0250979	-0.443588	-0.717958	-0.283621	1.27019	-0.731372	-0.560007	0.0268233	0.338852	-0.149671	-0.676288	-0.639523	-0.0627631	0.397079	-0.41653	-0.50045	-0.383574	0.120323	0.900185	-0.830019	-0.736746	-0.807697	-0.257497	-0.843285	-0.97599	0.00406585	0.646447
44.2	0.0491229	-0.077394	-0.420352	-0.130437	-0.27163	0.0998398	-0.495939	-0.542707	0.23717	-0.419199	0.183647	-0.357077	-0.338134	-0.174852	-0.176977	0.281883	-0.437048	-0.00559539	-0.34088	-0.924758	-0.449782	1.43264	-0.449258	-0.600414	-0.00781548	-0.0590326	-0.0588926	-0.341705	-0.190449	-0.270925	0.735686	-0.203845	-0.244262	-0.182404	-0.011987	0.826858	-0.57904	-0.733905	-0.541197	-0.240944	-0.807519	-0.407492	0.0241899	0.550095
44.3	0.121418	0.0565697	-0.316439	-0.156799	-0.101254	0.124427	-0.886928	-0.570242	0.61853	-0.391546	-0.13317	0.227949	-0.379169	-0.214019	-0.317241	0.484982	-0.254635	-0.0784102	-0.318958	-0.914362	-0.536916	1.43621	-0.530476	-0.635395	0.210588	-0.0652995	-0.167868	-0.272704	-0.792211	-0.242612	0.201281	0.00794476	-0.305132	-0.319879	-0.0296155	0.646305	-0.778088	-0.760989	-0.997426	-0.289645	-0.676852	-0.626623	-0.0716168	0.604746
44.4	0.15247	-0.00844341	-0.279246	-0.0603884	-0.415633	0.183005	-0.811297	-0.325686	0.470373	-0.41338	-0.0322262	1.2134	-0.343564	-0.177247	-0.251825	-0.0826322	-0.423329	-0.0714561	-0.190065	-0.578539	-0.582998	1.38505	-0.338391	-0.616578	0.239901	-0.576682	-0.0463826	-0.429532	-0.477837	-0.0913085	0.969551	-0.0633729	-0.388596	-0.308568	-0.121796	0.715289	-0.477767	-0.81424	-0.905989	-0.497757	-0.686363	-0.515844	0.164844	0.634642
44.5	0.025161	-0.0317013	-0.193934	-0.0781082	-0.502866	0.59619	-0.369531	-0.131208	0.445341	-0.274449	-0.0376561	1.99391	-0.371761	-0.211894	0.0100367	0.13284	-0.313985	0.265316	-0.206049	-0.785172	-0.52358	1.59056	-0.818211	-0.649839	0.10275	-0.673462	-0.120517	-0.561613	-0.24076	-0.365289	1.19945	-0.0302475	-0.52878	-0.545309	-0.152691	0.669419	-0.48745	-0.690449	-0.940274	-0.360953	-0.604008	-0.632078	0.744775	0.849261
44.6	0.26845	0.0445038	-0.299827	-0.190309	-0.227385	0.222419	-0.623984	-0.083055	0.281379	-0.23263	-0.21606	2.12398	-0.337142	-0.211761	-0.206498	0.217572	-0.211224	-0.0704805	-0.38405	-1.0781	-0.596143	1.38528	-0.632987	-0.641145	0.296325	-0.591966	-0.274126	-0.594938	-0.659094	-0.321453	1.11712	0.243032	-0.712437	-0.143616	-0.199483	0.940655	-0.547991	-0.705983	-0.962806	-0.289674	-0.962016	-0.666625	0.656274	0.681235
44.7	0.127459	-0.0279783	-0.354743	-0.228934	-0.0540108	0.310837	-0.420799	-0.29676	0.345198	-0.35799	-0.269053	2.1526	-0.369735	-0.0602201	0.0252743	0.177289	-0.38663	0.0535639	-0.185287	-1.12503	-0.541121	1.64931	-0.50145	-0.633034	0.0832977	-0.35372	-0.209749	-0.473925	-0.536198	-0.2361	0.66962	0.200328	-0.525209	-0.0580931	-0.281477	0.895896	-0.591878	-0.684601	-0.898628	-0.303148	-0.920771	-0.339996	0.398589	0.535707
44.8	0.0753313	0.04949	-0.179742	-0.109417	-0.03872	0.549667	-0.478256	-0.327082	0.418052	-0.350805	-0.052504	1.65645	-0.350978	-0.2511	0.481381	0.22699	-0.304546	0.13692	-0.280936	-0.563972	-0.603581	1.15819	-0.642122	-0.653814	0.246414	-0.0176131	-0.236067	-0.444373	0.153276	-0.288278	1.05602	0.635805	-0.132536	-0.0439898	-0.29063	0.766259	-0.505007	-0.670983	-0.908007	-0.295699	-0.799177	-0.866377	0.917945	0.558082
44.9	0.0646705	0.0207399	-0.294719	-0.106409	-0.00685194	0.537871	-0.613133	-0.131205	0.418068	-0.380243	0.00954853	1.22067	-0.389501	-0.234593	0.320282	0.217211	-0.294414	0.353493	-0.157073	-0.741211	-0.624914	1.20104	-0.834468	-0.611639	0.226185	-0.128037	-0.139475	-0.6497	-0.185647	-0.180877	0.275893	0.437786	-0.260432	-0.0876149	-0.275114	0.688056	-0.512873	-0.811133	-1.15887	-0.447977	-0.486391	-0.75144	0.739349	0.376767
45	-0.0371562	0.110204	-0.21934	-0.144533	0.0833662	0.53913	-0.541582	-0.29867	0.669133	-0.59645	0.0119357	1.04082	-0.355926	-0.226088	0.105453	0.396708	-0.279732	-0.121968	-0.316024	-0.529269	-0.591284	1.07922	-0.681578	-0.651243	0.376429	-0.374663	-0.0688578	-0.764048	-0.427842	-0.0681145	0.260968	0.298568	-0.326726	-0.318898	-0.335986	0.625501	-0.575862	-0.558195	-1.21272	-0.395445	-0.839369	-0.88353	1.10994	0.534685
45.1	0.146354	0.0460365	-0.267301	-0.138004	-0.0378777	0.300301	-0.937636	-0.132791	0.653316	-0.356994	-0.144971	1.22965	-0.364188	-0.209269	0.253512	0.443423	-0.325665	0.116022	-0.474188	-0.819936	-0.761526	0.853594	-0.567254	-0.697297	0.0636242	0.136102	-0.211515	-0.432499	-0.153314	-0.155357	0.746383	0.291674	-0.260983	-0.0973162	-0.398795	0.550897	-0.628278	-0.702198	-1.09419	-0.399808	-1.04322	-0.725903	0.5542	0.71109
45.2	0.637038	0.0916654	-0.224129	-0.176245	-0.112843	0.433515	-0.554806	-0.296096	0.490468	-0.278551	0.12604	0.700228	-0.368792	-0.296946	0.269307	0.299608	0.0993983	0.402271	-0.121047	-0.895534	-0.721073	1.48329	-0.563085	-0.658395	0.223975	0.18464	-0.000141899	-0.051888	-0.304462	-0.508963	0.791533	0.401321	-0.331262	-0.209698	-0.343472	0.901754	-0.698929	-0.698248	-0.422178	-0.432871	-0.817327	-0.525217	0.589305	0.621874
45.3	0.607068	0.105396	-0.212858	-0.124082	-0.259223	0.28122	-1.08957	-0.073045	0.602807	-0.371012	-0.168783	0.455898	-0.405834	-0.184531	0.473182	0.0847995	0.215726	0.82337	-0.466133	-0.775753	-0.734694	1.5368	-0.491166	-0.662824	0.135481	-0.216258	0.126478	0.14549	-0.287626	0.0764221	0.789191	0.146104	-0.388368	-0.37032	-0.338919	1.17278	-0.777171	-0.660611	-0.436649	-0.417794	-0.545206	-0.710029	0.785882	0.420782
45.4	0.75161	0.166214	-0.269214	-0.078349	-0.204202	0.48518	-0.708658	0.117049	0.435302	-0.45306	0.478306	0.507622	-0.368703	-0.283535	0.219288	0.1831	0.356104	0.200402	-0.252185	-0.830218	-0.639724	1.659	-0.345552	-0.681457	0.241908	0.130773	-0.00706718	-0.0530815	-0.18644	0.0724044	1.15604	0.152399	-0.417565	-0.081553	-0.420188	1.35721	-0.857222	-0.530227	-0.12	-0.369719	-0.699522	-0.756616	0.671916	0.697615
45.5	0.627418	0.187113	-0.122008	-0.0878589	-0.234552	0.525124	-0.832104	-0.500905	1.13944	-0.41145	0.778211	0.432141	-0.406738	-0.284514	0.329668	0.369194	0.141081	0.464811	-0.27508	-0.849688	-0.719942	1.50686	-0.485521	-0.673835	0.219394	-0.281999	-0.00634833	0.0405216	-0.18796	-0.160056	1.28102	0.0908258	-0.260503	-0.196352	-0.413523	1.58754	-0.727873	-0.776799	-0.832879	-0.518652	-0.690507	-0.788059	0.692331	0.251278
45.6	0.674508	0.392014	-0.223112	-0.0735114	-0.0278487	0.338184	-0.647639	-0.336214	2.03094	-0.468216	0.865995	0.0420775	-0.401192	-0.204673	0.324237	0.18292	0.195418	0.498969	-0.377874	-0.967556	-0.834799	2.25927	-0.460209	-0.771975	0.167579	0.0193745	0.193539	-0.203413	-0.142411	0.0149198	0.503658	0.168801	-0.159351	-0.1463	-0.426394	1.83418	-0.732929	-0.774011	-0.380699	-0.586425	-0.48485	-0.784087	0.381782	0.33541
45.7	0.812083	0.324055	-0.293823	-0.04392	-0.0914186	0.614338	-0.331502	-0.209104	2.14504	-0.376998	1.05786	0.258128	-0.403914	-0.325134	0.121419	0.137621	0.243688	-0.0318884	-0.210985	-1.03317	-0.740846	2.55131	-0.771499	-0.774212	0.00783851	0.0648697	0.200184	-0.0222215	-0.0749791	-0.173518	0.658376	0.195267	-0.243962	-0.0581413	-0.473466	1.66851	-0.529494	-0.722455	0.119567	-0.349754	-0.526199	-0.735113	0.657986	0.597513
45.8	0.791143	0.299485	-0.301885	-0.0966804	-0.1868	0.585801	-0.78997	-0.408112	2.56802	-0.325616	1.05571	-0.0133727	-0.37448	-0.270292	-0.00299734	0.397309	0.0621069	0.267864	-0.317984	-1.15636	-0.705851	2.48923	-0.849388	-0.690892	0.227748	-0.273325	0.0683459	-0.681016	0.0098312	-0.238891	0.536683	0.0998929	-0.173684	-0.0546583	-0.394249	1.63512	-0.664135	-0.6448	-0.291053	-0.422105	-0.509131	-0.867326	0.858692	0.429195
45.9	0.732503	0.213156	-0.334012	-0.0030839	-0.081029	0.731025	-0.782214	-0.423604	2.42277	-0.309453	0.698036	-0.19278	-0.440353	-0.215847	0.0945292	0.350945	0.0686796	0.0675589	-0.49336	-0.924799	-0.729713	2.79607	-0.478201	-0.652095	0.213847	-0.193396	0.0557375	-0.299538	0.105174	0.185611	0.580244	0.0660966	-0.38666	-0.0973823	-0.538366	1.35943	-0.493642	-0.818051	-0.920389	-0.560309	-0.509001	-0.706839	0.525939	0.279404
46	0.687614	0.227533	-0.238338	-0.0804144	-0.07226	0.543852	-0.297113	-0.130573	2.14397	-0.255212	1.04703	0.0285578	-0.398721	-0.161928	0.264478	0.179913	-0.00136176	0.23348	-0.376244	-0.913994	-0.678459	2.27594	-0.452214	-0.694671	0.312978	-0.0266577	0.283662	-0.340847	-0.106964	-0.096512	0.228417	0.0449884	-0.268637	-0.268336	-0.454786	1.28378	-0.77057	-0.613188	-0.514182	-0.421595	-0.379775	-0.78212	0.597414	0.166425
46.1	0.658563	0.220498	-0.394437	-0.112325	0.154298	0.442637	-0.693654	-0.317754	2.10115	-0.214611	0.275329	-0.040559	-0.363856	-0.297048	-0.0329387	0.205051	-0.0142282	0.77502	-0.398063	-0.782694	-0.709798	2.49502	-0.637256	-0.69327	0.250111	0.274865	0.237431	0.0427381	-0.292908	-0.108341	0.697346	-0.0810337	-0.235166	0.0280299	-0.530845	1.64219	-0.860546	-0.653298	-1.0062	-0.403909	-0.626571	-0.901772	0.587104	0.45469
46.2	0.565873	0.255436	-0.399307	-0.215323	-0.0509495	0.300553	-0.17008	-0.650403	2.102	-0.37139	0.810818	-0.167061	-0.381618	-0.288432	0.260599	0.465214	0.0916652	0.526721	-0.348801	-0.875575	-0.748653	2.26311	-0.433184	-0.507751	0.318289	-0.0835701	0.369444	-0.774321	-0.430767	-0.117063	0.636532	-0.0214891	-0.337672	0.116086	-0.364187	1.81598	-0.575533	-0.707031	-0.795207	-0.413549	-0.586766	-0.948649	0.964117	0.168032
46.3	0.587251	0.432466	-0.245183	-0.124348	-0.00335745	0.224011	-0.210655	-0.252792	1.77158	-0.30351	0.522186	-0.539594	-0.360425	-0.256405	0.0194348	0.638005	-0.00274642	1.17435	-0.463638	-0.992675	-0.774556	2.41853	-0.551129	-0.632853	0.374133	-0.263887	0.522461	-0.422393	-0.0684553	-0.0376823	0.772334	-0.115892	-0.454815	-0.147968	-0.515056	1.84055	-0.754485	-0.87087	-0.362094	-0.421397	-0.559035	-0.972168	1.18858	0.117262
46.4	0.448944	0.784115	-0.290505	-0.0983209	0.0783053	0.277213	-0.288517	-0.376274	1.94238	-0.133639	0.22774	-0.213132	-0.38559	-0.214646	0.427527	0.357814	0.050868	0.562463	-0.398379	-1.18728	-0.820637	2.17414	-0.117149	-0.565153	0.439732	-0.042938	0.493179	-0.432571	-0.396592	0.0162467	0.310169	-0.0549404	-0.407536	-0.23237	-0.48921	1.55281	-0.706842	-0.669749	-0.778585	-0.348643	-0.771805	-0.928314	1.10704	0.32156
46.5	0.400791	0.867361	-0.252802	-0.129589	-0.0325972	0.467404	-0.451073	-0.271592	1.63771	-0.190098	0.565029	-0.473693	-0.439073	-0.0920139	-0.00125459	0.417382	-0.134604	0.739529	-0.417013	-1.23444	-0.650003	2.23164	-0.311413	-0.786617	0.164076	-0.139938	0.531007	-0.189693	0.292737	0.200127	0.519419	0.0465199	-0.265273	0.0360725	-0.529698	1.55003	-0.790345	-0.712101	-0.558483	-0.505332	-0.853381	-0.873563	1.41011	0.52036
46.6	0.378288	0.973306	-0.291792	-0.123891	-0.0894517	0.38811	-0.781239	-0.300565	1.87891	-0.249218	0.49247	-0.723805	-0.448905	-0.16652	0.139514	0.494766	-0.024707	0.642928	-0.47473	-0.720201	-0.790369	2.34624	-0.404969	-0.639603	0.204892	0.15511	0.675661	0.0411468	0.0774579	-0.0937675	0.451962	-0.133298	-0.35782	-0.117079	-0.488217	1.38457	-0.773861	-0.826651	-0.845344	-0.458405	-0.456024	-0.732089	1.17627	0.52445
46.7	0.3512	0.749865	-0.271478	-0.0665177	-0.168416	0.445965	-0.516193	-0.466693	3.42066	-0.348275	-0.130269	-0.240271	-0.403965	-0.169975	0.350017	0.435192	-0.0734225	0.296897	-0.417614	-0.593059	-0.819713	2.03128	-0.240308	-0.568377	0.00790747	-0.141034	0.462016	-0.630153	-0.232139	0.270159	0.745104	-0.0741533	-0.231335	0.135911	-0.47226	1.388	-0.312463	-0.742682	-0.729806	-0.52976	-0.551053	-0.757321	1.06039	0.190911
46.8	0.469882	0.734874	-0.234073	-0.162228	-0.0736955	0.151818	-0.921359	-0.194526	4.25205	-0.352083	0.268392	-0.0926386	-0.376322	-0.211988	0.714993	0.326158	-0.147348	-0.148299	-0.476728	-1.41316	-0.719954	2.12348	-0.483349	-0.680262	-0.0328014	-0.134895	0.686285	-0.228689	-0.508282	-0.100127	0.895215	-0.460627	-0.547067	-0.20808	-0.532103	1.07277	-0.29058	-0.738916	-0.700362	-0.478548	-0.778958	-0.884752	1.08977	0.194314
46.9	0.479216	0.695415	-0.325004	-0.138257	-0.228657	0.305891	-0.799606	-0.0147922	4.56493	-0.256237	-0.1457	-0.424892	-0.401935	-0.228839	0.0819942	0.300388	-0.126414	0.300568	-0.444033	-1.035	-0.808233	2.11196	-0.296971	-0.703762	0.137805	0.0115676	0.614187	-0.662695	-0.387053	-0.112534	0.332104	-0.252111	-0.534125	-0.0425684	-0.482141	0.996362	-0.478554	-0.707706	-0.745027	-0.468437	-0.65143	-0.804363	0.957964	0.147722
47	0.479768	0.562926	-0.327423	-0.15541	-0.0352635	0.143731	-1.0115	-0.288874	4.81648	-0.51534	0.271574	-0.343172	-0.357032	-0.304519	0.267505	0.0558308	-0.269756	0.252649	-0.408521	-0.73775	-0.814878	1.63889	-0.335442	-0.541004	-0.0764248	0.24553	0.527504	0.0706292	-0.185122	-0.0930733	0.471437	0.116059	-0.376496	0.160147	-0.538864	1.29729	-0.353507	-0.799972	-0.460942	-0.511942	-0.714716	-0.819629	1.08619	0.0418612
47.1	0.343468	0.680183	-0.343597	-0.10793	-0.175417	0.0513442	-0.443345	-0.207766	4.16003	-0.402881	0.136606	-0.125407	-0.386567	-0.0848189	0.287979	0.17996	-0.1511	-0.0729414	-0.400227	-1.0627	-0.790186	1.78693	-0.620161	-0.690768	-0.00859703	0.063275	0.388127	-0.484958	-0.221466	-0.197937	0.162003	-0.228294	-0.458651	-0.0871466	-0.477477	1.28141	-0.56539	-0.683258	-0.626162	-0.405616	-0.820385	-0.998605	1.23182	0.153785
47.2	0.462989	0.53818	-0.187435	-0.0985624	-0.0803847	0.0780222	-0.558514	-0.165464	4.13506	-0.300399	0.248788	-0.248316	-0.388197	-0.159863	0.260593	0.582037	-0.313854	0.107667	-0.392081	-1.06591	-0.762525	1.95868	-0.489605	-0.745237	0.12107	-0.118376	0.329562	-0.816351	-0.26135	-0.101952	0.311458	-0.0770465	-0.387168	0.00744544	-0.529698	1.02369	-0.682113	-0.73258	-0.819781	-0.616158	-0.776836	-1.00346	0.774927	0.219846
47.3	0.296716	0.664476	-0.400271	-0.0765145	-0.0772159	0.176426	-0.128932	-0.190616	3.93842	-0.454034	0.151711	-0.378631	-0.395559	-0.105872	-0.105466	0.456329	-0.209398	0.0984087	-0.700278	-0.954542	-0.683485	1.27085	-0.447927	-0.837431	0.19609	0.221357	0.0784188	-0.342463	-0.352943	0.183148	0.12785	-0.053485	-0.669265	-0.293407	-0.478251	1.30143	-0.568835	-0.735545	-0.593191	-0.411113	-0.821299	-1.10424	0.613678	0.173046
47.4	0.412632	0.909199	-0.445906	-0.134035	-0.146718	0.132439	-0.670753	-0.419799	3.72435	-0.314847	0.37638	-0.461024	-0.351338	-0.18289	0.102045	-0.341735	-0.141968	0.016406	-0.411776	-0.961967	-0.787584	1.74659	-0.559093	-0.784954	0.231639	0.0991387	0.149686	-0.36744	-0.0646297	-0.0649988	0.474409	-0.280945	-0.451593	-0.0745917	-0.45547	1.5029	-0.681817	-0.637792	-0.723746	-0.485203	-0.901491	-0.893017	0.477483	0.131957
47.5	0.413043	0.817011	-0.196726	-0.120273	-0.0195539	0.28619	-0.463594	-0.103121	3.32405	-0.499826	0.256914	-0.175534	-0.408614	-0.235036	-0.00752755	0.0271864	-0.317016	0.452793	-0.525875	-0.893285	-0.675941	2.39916	-0.431378	-0.69721	0.102113	-0.296539	-0.0268866	-0.33941	-0.207833	0.187035	0.51241	-0.194818	-0.333406	-0.212366	-0.549461	1.15046	-0.599791	-0.716494	-0.916171	-0.455887	-0.843154	-0.80703	0.142352	0.129409
47.6	0.282806	1.13594	-0.341269	-0.0591366	0.0145261	0.324346	-0.795147	-0.396414	3.15517	-0.499833	-0.182125	-0.580704	-0.433293	-0.0973769	0.319285	0.244576	-0.227747	0.115767	-0.448529	-0.956113	-0.684608	2.06253	-0.675787	-0.770208	0.376278	0.36409	-0.00981386	-0.593743	-0.0738809	0.278113	0.0808581	-0.393099	-0.493542	-0.28775	-0.459657	1.09913	-0.623162	-0.869041	-1.14509	-0.533786	-1.12381	-1.08621	0.0682853	0.15382
47.7	0.243325	1.29496	-0.444669	-0.0977465	-0.0924904	0.539771	-0.814708	-0.283437	2.72792	-0.249477	0.0135022	0.448323	-0.380592	-0.345052	0.126104	0.242426	-0.202143	0.688214	-0.415504	-0.703176	-0.745434	1.97611	-0.22588	-0.762933	0.185851	-0.398312	0.15787	-0.248881	0.148445	-0.042491	0.214207	-0.196639	-0.286321	-0.269725	-0.277604	0.865102	-0.482813	-0.732778	-0.599955	-0.417792	-1.4183	-0.930481	0.606432	0.321683
47.8	0.320614	1.38895	-0.204692	-0.0510418	0.0183615	0.530735	0.246062	-0.206268	2.58802	-0.342116	-0.0910994	0.372637	-0.391877	-0.159724	0.298362	0.638478	-0.222127	0.404401	-0.40933	-0.532152	-0.747969	2.16076	-0.358033	-0.661801	0.213999	0.144715	-0.0549476	-0.608161	-0.00158286	0.0970386	0.415625	-0.300798	-0.21404	-0.26794	-0.581617	0.864738	-0.520146	-0.713855	-0.739558	-0.427353	-0.800634	-0.939906	0.514772	0.277105
47.9	0.277928	1.8141	-0.270171	0.00316027	-0.0715858	0.866701	-0.329286	-0.0465021	2.19118	-0.23096	0.349545	0.475457	-0.362611	-0.112036	0.00129565	0.462726	-0.172536	0.327197	-0.12206	-0.969222	-0.754775	2.35205	-0.474812	-0.509916	0.192795	-0.545741	-0.111003	-0.483568	-0.24619	0.189816	0.00116956	-0.24588	-0.265825	-0.185115	-0.393183	0.88983	-0.463641	-0.796614	-0.950468	-0.361731	-0.723532	-0.782133	0.679023	0.446788
48	0.129171	1.74882	-0.290812	-0.14109	0.0306364	1.16292	-0.397442	-0.196195	2.16261	-0.306635	-0.183235	0.605632	-0.395239	-0.20258	0.261255	0.660284	-0.203459	0.916299	-0.489138	-0.831421	-0.638297	2.62611	-0.241799	-0.596782	0.145346	-0.263727	-0.164883	-0.394694	0.0700382	0.353648	-0.520141	-0.289291	-0.3535	-0.0316929	-0.344594	1.10267	-0.431027	-0.819236	-0.738147	-0.392663	-1.2523	-0.768681	1.20331	0.639658
48.1	0.300481	1.86241	-0.373358	-0.0800868	0.153357	1.5957	-0.204848	0.0257766	1.92286	-0.288761	-0.223162	0.990995	-0.390481	-0.244513	0.627424	0.623905	-0.0343178	0.486667	-0.319911	-0.677016	-0.648568	2.62198	-0.236832	-0.589102	0.0697559	-0.109906	-0.02994	-0.522809	-0.293168	0.187615	-0.150156	-0.16757	-0.349178	-0.325761	-0.399641	0.947633	-0.532664	-0.797065	-0.854079	-0.382804	-0.807927	-0.745876	0.49595	0.491043
48.2	0.224233	1.88635	-0.351	0.084776	-0.128306	1.75675	-0.337443	-0.0759873	1.95471	-0.296676	-0.301778	2.01231	-0.385232	-0.186436	0.702459	0.673809	-0.081013	0.53446	-0.193582	-0.640489	-0.699046	2.68982	-0.32765	-0.617362	0.0667858	-0.432091	-0.081818	-0.473145	-0.0952183	0.148522	-0.571651	-0.443265	-0.543368	-0.102649	-0.363427	0.901363	-0.341019	-0.708223	-0.602836	-0.360536	-0.811551	-0.618165	0.945145	0.37113
48.3	0.112279	1.89355	-0.326953	-0.0457857	-0.0146974	2.15927	-0.364534	-0.237247	1.88701	-0.360498	0.00869065	2.27074	-0.37644	-0.346755	0.578347	0.638584	-0.0800181	0.374056	-0.402981	-0.764467	-0.655188	2.82569	-0.27784	-0.708157	0.188921	-0.590023	-0.117323	-0.654601	-0.0168181	0.131261	-0.150755	-0.44397	-0.237463	-0.148827	-0.525305	0.766118	-0.497092	-0.973601	-0.866105	-0.463583	-0.855176	-0.678497	0.577718	0.536619
48.4	-0.0287049	1.95534	-0.389438	0.0200884	-0.144589	2.88064	-0.221492	-0.15107	1.23748	-0.0922425	-0.0686179	2.22398	-0.435135	-0.280387	0.426355	0.0839552	-0.0130197	0.244716	-0.154874	-0.763639	-0.653245	2.67122	-0.616572	-0.541328	0.0922267	-0.519479	0.190973	-0.968385	0.186233	0.237098	0.0839892	-0.287868	-0.322138	0.0565196	-0.455608	0.722409	-0.365395	-0.836382	-1.01495	-0.426526	-0.856069	-0.714523	0.785466	0.55068
48.5	0.192797	2.05005	-0.268781	-0.0197959	-0.112755	2.55889	0.126955	-0.223538	1.50235	-0.349915	0.0629686	1.90182	-0.379841	-0.252527	0.594778	0.364762	0.0288424	0.704306	-0.168778	-0.775453	-0.638742	2.78362	-0.631038	-0.764117	0.0813535	-0.776682	0.0221801	-0.456465	0.227376	-0.128835	-0.298461	-0.339849	-0.270438	0.11036	-0.552268	0.842953	-0.474911	-0.753537	-0.746555	-0.399513	-0.750702	-0.639235	0.501515	0.644856
48.6	0.209321	2.29288	-0.389736	-0.0170414	-0.04693	2.45163	0.0431665	-0.0927977	1.38293	-0.350828	0.216647	2.06025	-0.400094	-0.21854	0.61979	0.63661	-0.181236	0.532886	-0.285433	-0.510861	-0.652198	3.05651	-0.503166	-0.70503	-0.0751578	-0.24281	0.0373194	-0.323168	0.329912	0.305194	0.158974	-0.487681	-0.0574394	0.0273928	-0.515353	0.770438	-0.659393	-0.755689	-0.480495	-0.37851	-0.561769	-0.683721	0.892272	0.681371
48.7	0.308517	2.64068	-0.373354	-0.028684	-0.278888	2.55959	0.060593	-0.414191	1.15385	-0.220348	0.0201414	2.81373	-0.455095	-0.306193	0.37607	0.197652	-0.090102	0.370252	-0.316752	-0.24791	-0.655765	2.95096	-0.542748	-0.616875	0.295665	-1.10571	0.234138	-1.08703	0.19601	0.0045957	0.379127	-0.449272	-0.0569953	0.475421	-0.498364	1.25814	-0.497863	-0.793454	-0.429612	-0.414324	-0.47616	-0.796037	0.815244	0.939684
48.8	0.194091	2.57793	-0.476009	0.0243031	0.00817094	3.15155	0.097797	-0.303232	1.08901	-0.199105	-0.100593	2.37758	-0.450286	-0.283297	1.07491	0.228545	0.0766419	0.885418	-0.101884	-0.946626	-0.661804	2.94296	-0.558792	-0.740054	0.122289	-0.817215	0.265876	-0.923367	0.00522477	-0.00760553	0.275323	-0.367987	-0.139027	0.296205	-0.47864	1.54963	-0.762263	-0.833562	-0.728462	-0.40352	-0.492298	-0.706637	0.732204	0.515243
48.9	0.23181	2.58726	-0.456052	0.00689289	-0.296047	2.98437	-0.780581	-0.686858	0.833509	-0.206057	0.0766849	2.62881	-0.394174	-0.284778	0.704049	0.340531	-0.111868	0.847309	-0.269536	-0.562191	-0.59577	3.08252	-0.50431	-0.695686	0.0708556	-0.982203	0.126236	-0.568868	0.351018	-0.110663	0.618521	-0.597279	0.116292	0.391645	-0.347382	1.29833	-0.63	-0.784676	-1.21732	-0.50541	-0.568147	-0.545264	0.516372	0.629103
49	0.0685586	2.51287	-0.241151	-0.0273707	0.0383786	2.90937	-0.727426	-0.359714	1.10292	-0.255559	0.239312	2.66535	-0.437797	-0.312027	0.363622	0.121176	-0.0677409	0.773559	-0.220878	-0.44275	-0.579185	2.81173	-0.298966	-0.732788	-0.0522436	-0.765684	0.163501	-0.436543	0.494666	0.0171853	0.447108	-0.546637	-0.281538	0.248167	-0.50591	1.34238	-0.603752	-0.727023	-0.762436	-0.347314	-0.710756	-0.740026	0.76188	0.476239
49.1	0.148662	2.50489	-0.434788	-0.123754	-0.179519	3.20159	-0.402016	-0.132116	1.02102	-0.0607871	-0.605945	2.4642	-0.424754	-0.239038	0.350176	0.279861	-0.124186	0.37187	-0.271124	-0.657591	-0.555864	2.66836	-0.409662	-0.881812	0.0545033	-0.716703	0.241735	-0.371918	0.193557	0.139834	0.0893307	-0.438688	0.00396108	0.165461	-0.423172	1.31829	-0.721462	-0.768059	-0.914097	-0.311856	-0.376369	-0.408329	0.529902	0.338464
49.2	0.0203729	2.40525	-0.276306	0.0460124	-0.0543085	2.67348	0.137181	0.0366379	0.858946	-0.115111	-0.23925	2.25574	-0.3596	-0.32074	0.129764	0.202271	-0.132508	0.54223	-0.295191	-0.809488	-0.613549	2.42987	-0.369461	-0.546084	0.239331	-0.915504	0.192468	-0.192818	0.274109	0.280515	0.47536	-0.442284	0.11438	0.0369087	-0.357546	1.00099	-0.715281	-0.663087	-0.873836	-0.365988	-0.722304	-0.655806	0.0671055	0.306068
49.3	0.0593671	2.35892	-0.459988	-0.0551689	0.137626	2.65569	-0.385559	-0.410279	0.731634	-0.180888	0.0337928	2.77964	-0.439729	-0.389532	0.407413	0.278119	-0.0910353	0.323336	-0.182135	-0.701507	-0.615523	2.22866	-0.454257	-0.633466	0.164017	-0.414901	0.552843	-0.178041	-0.0193532	-0.117092	0.432546	-0.624923	-0.023901	0.0640515	-0.469382	1.18872	-0.797634	-0.811869	-0.722378	-0.439415	-0.669736	-0.647115	0.63704	0.389248
49.4	0.0521554	2.13187	-0.340658	-0.119726	-0.103729	2.48418	-0.167176	0.0393213	0.772993	-0.213787	-0.270926	1.81095	-0.319956	-0.306912	0.542522	0.389207	-0.186315	0.52361	-0.345049	-0.844455	-0.613772	1.79689	-0.285587	-0.729999	-0.066129	-0.986073	1.67432	-0.459013	0.137313	0.0386355	0.118999	-0.452746	0.10509	-0.0139353	-0.276212	1.28432	-0.596324	-0.823147	-0.702718	-0.38317	-0.584028	-0.664356	0.527197	0.266873
49.5	0.145648	2.11017	-0.35466	-0.0984599	0.0798383	2.2031	-0.0386101	-0.310287	0.706319	-0.204938	0.364733	2.30783	-0.43618	-0.242182	0.597893	0.221056	-0.0605372	0.514258	-0.215885	-0.846391	-0.612115	2.15789	-0.408989	-0.670214	-0.0444971	-0.580264	1.80798	-0.565128	0.424322	-0.0368234	0.296721	-0.722439	0.251974	0.0233715	-0.592427	1.50081	-0.732696	-0.793961	-0.665641	-0.394447	-0.777988	-0.704559	0.623252	0.22245
49.6	0.244465	2.13357	-0.302356	0.005909	-0.0733003	1.90233	-0.444271	-0.192351	0.62809	-0.00764745	-0.220968	1.51551	-0.386264	-0.256749	0.867245	0.350353	-0.169195	0.254375	-0.365008	-0.88511	-0.682693	1.92184	-0.41425	-0.693111	-0.0537164	-0.522208	1.92137	-0.528632	0.241067	-0.0370985	-0.0666757	-0.579779	0.126166	0.256572	-0.589084	1.5206	-0.608213	-0.813749	-0.693799	-0.474661	-0.917908	-0.60784	0.267439	0.430672
49.7	0.225452	1.9505	-0.365001	-0.0355669	-0.0909275	1.66387	-0.500589	0.00446697	0.567303	-0.226342	0.168112	1.72894	-0.431166	-0.338559	0.373843	0.0654145	-0.335608	0.216042	-0.16553	-0.721597	-0.69126	2.48404	-0.59017	-0.699429	0.0697021	-0.606677	1.80403	-0.236151	0.333518	0.0269916	-0.0289174	-0.690187	0.357884	-0.0490606	-0.540763	1.69555	-0.85807	-0.813583	-0.91268	-0.414051	-0.703154	-0.187371	1.05814	0.514592
49.8	0.312094	1.94547	-0.400813	-0.0552796	0.0339125	2.1208	-0.466325	-0.112526	0.72137	-0.348248	-0.0474586	1.54633	-0.389603	-0.320558	0.330115	0.219348	-0.235185	1.00065	-0.24443	-0.858276	-0.70018	2.05441	-0.387824	-0.800257	0.379889	-0.725898	1.98619	-0.122045	0.509912	-0.108523	0.408626	-0.516656	0.0872827	-0.324736	-0.491851	1.87061	-0.790163	-0.78832	-0.638677	-0.411966	-0.671035	-0.611613	1.24872	0.369194
49.9	0.429197	1.69912	-0.32057	-0.0927943	-0.0406407	1.28163	0.094661	-0.0922503	0.77807	-0.232481	-0.0156282	1.61463	-0.433845	-0.242667	0.064007	0.00557238	-0.184519	1.06256	-0.0873439	-0.721817	-0.686104	1.79766	-0.544076	-0.698778	0.185721	-0.443576	1.79589	-0.385258	0.476281	-0.29843	0.300225	-0.365181	-0.132075	0.166152	-0.383609	1.97077	-0.758109	-0.774503	-0.652185	-0.476511	-0.969318	-0.310361	1.07253	0.355775
50	0.396439	1.61531	-0.398455	-0.0304197	-0.188742	1.40868	-0.251021	0.0367385	0.714905	-0.157425	0.093249	1.06763	-0.34594	-0.325811	0.189608	0.294524	-0.225651	0.594412	-0.160093	-0.702453	-0.641052	1.66948	-0.458739	-0.804924	-0.0338285	-0.546688	1.67432	-0.447782	0.715518	0.104382	0.548496	-0.290214	-0.195202	0.147293	-0.497933	1.59805	-0.752654	-0.871611	-0.98898	-0.255684	-0.927178	-0.428555	0.939356	0.242396
50.1	0.382026	1.52318	-0.272584	0.00429167	0.0346749	1.15176	-0.560784	0.123392	0.753941	0.0370175	0.0827747	1.06125	-0.440967	-0.293826	0.350428	0.157881	-0.279114	1.19775	-0.0483199	-0.67539	-0.685787	1.81738	-0.432768	-0.6087	0.206482	-0.468295	2.00213	-0.608805	0.791897	-0.054009	0.0132614	-0.464865	-0.0459935	0.231104	-0.546148	1.53535	-0.917956	-0.704629	-0.862856	-0.430672	-1.25126	-0.104561	0.506826	0.0699504
50.2	0.418682	1.49344	-0.375592	-0.0686091	-0.0090103	1.26538	-0.79741	-0.216489	0.833289	-0.0986491	-0.0123086	1.01737	-0.426489	-0.307049	0.47418	0.197235	-0.239267	0.603307	-0.21208	-0.65313	-0.582326	2.25566	-0.316528	-0.591472	0.0366591	-0.533368	2.04807	-0.703209	0.407754	-0.0926277	0.0586635	-0.236457	-0.0370139	0.324984	-0.42082	1.66857	-0.628666	-0.745274	-0.654927	-0.451648	-0.797046	-0.245817	0.403367	0.344847
50.3	0.342432	1.35396	-0.280741	-0.0612577	0.0178618	0.85818	-0.0863107	-0.451664	0.953363	-0.0730618	0.231479	1.02964	-0.370647	-0.28657	0.824692	0.511419	-0.393978	0.754971	-0.310709	-0.507976	-0.618197	2.16013	-0.414238	-0.875561	0.288513	-0.267241	1.7772	-0.536353	0.910521	0.127789	-0.0863837	-0.29239	0.141582	0.368508	-0.331327	1.7185	-0.654643	-0.744171	-0.43531	-0.447894	-0.743864	-0.296159	0.529886	0.038565
50.4	0.399474	1.20854	-0.43845	-0.0709309	-0.124433	1.02881	-0.543019	-0.00479647	0.778861	-0.181586	0.303288	0.466761	-0.347139	-0.407018	1.61351	0.202566	-0.338313	0.711301	-0.229789	-0.819952	-0.565527	2.39899	-0.510114	-0.759943	0.295895	-0.359922	1.55406	-0.678572	0.46561	-0.0882339	-0.016761	-0.507863	0.0342371	0.258136	-0.471018	1.55723	-0.833533	-0.665111	-0.69279	-0.464741	-0.898138	-0.179944	0.475478	0.195799
50.5	0.367245	1.15464	-0.354658	-0.0834104	0.0278607	0.821573	-0.377948	0.0281931	1.03592	-0.119173	-0.111687	0.407673	-0.406632	-0.273042	1.34113	0.613629	-0.34005	0.784327	-0.195396	-0.70339	-0.659982	1.84526	-0.306743	-0.70533	0.0463425	-0.0642113	1.46709	-0.943129	0.664532	-0.0777684	-0.00267995	-0.395202	-0.0984658	0.378999	-0.423648	1.52427	-0.687668	-0.6748	-0.379115	-0.402939	-0.597616	-0.503437	0.810496	0.291988
50.6	0.388275	1.02377	-0.29346	-0.142849	-0.184291	0.807556	-0.05164	-0.10251	1.02322	-0.131383	0.146507	0.620882	-0.362955	-0.152675	1.07152	0.022796	-0.345207	0.610264	-0.28908	-0.703731	-0.588032	2.01037	-0.394824	-0.751013	0.151136	-0.384687	1.28736	-0.172299	0.538381	-0.0781525	0.230587	-0.322907	-0.0781928	0.341396	-0.494861	1.76629	-0.926568	-0.786765	-0.424748	-0.314571	-0.706026	-0.445774	0.498417	0.379693
50.7	0.408779	0.953784	-0.312689	-0.0952257	0.0498203	0.684811	-0.476104	-0.112281	1.03625	-0.212673	0.143009	0.22072	-0.440517	-0.237951	0.945882	0.0127911	-0.423011	0.558766	-0.281903	-0.889568	-0.604412	2.0718	-0.210907	-0.892371	0.392326	-0.190876	1.17582	-0.0119916	0.577927	0.0463783	0.118392	-0.332295	-0.141513	0.506232	-0.434174	1.61005	-0.574175	-0.894564	-0.665922	-0.494475	-0.748952	-0.452399	0.23572	0.0596712
50.8	0.352107	0.997927	-0.210104	-0.0865632	-0.148887	0.782846	-0.122201	0.156297	1.01033	-0.209225	0.0371497	0.30157	-0.37515	-0.18979	1.00786	-0.0122001	-0.345687	0.46548	-0.312669	-0.592431	-0.555039	2.37483	-0.199888	-0.655242	0.189592	0.0453657	1.04406	-0.007786	0.443114	-0.291429	0.300723	-0.215469	-0.00238774	0.432428	-0.456459	1.38026	-0.71338	-0.641267	-0.548849	-0.382957	-0.497375	-0.557785	0.626374	0.279953
50.9	0.564461	0.948635	-0.307139	-0.0894166	-0.0432361	0.86041	-0.340082	0.0362849	0.747733	-0.123969	-0.0379832	0.412415	-0.384489	-0.079606	0.425183	0.222538	-0.315429	0.935833	-0.293432	-0.479671	-0.682221	2.13041	-0.203726	-0.570156	0.0648669	-0.0993786	1.15886	-0.444545	0.49825	-0.123163	-0.120935	-0.302852	-0.219799	0.434045	-0.561739	1.53727	-0.4595	-0.687497	-1.01713	-0.353871	-0.930282	-0.4625	0.0728074	0.323185
51	0.470674	0.888955	-0.285845	-0.0839501	-0.026861	0.922713	-0.518957	0.112005	0.793252	-0.13356	-0.160936	0.361967	-0.379009	-0.15999	0.73666	0.435165	-0.338942	0.370843	-0.340538	-0.603767	-0.647867	2.36273	-0.0237256	-0.602628	0.168972	-0.504831	1.02725	0.0180728	0.242423	-0.168833	0.196513	-0.383067	-0.232989	0.484389	-0.53023	1.20652	-0.719136	-0.663984	-0.754786	-0.50832	-0.616899	-0.537431	0.011231	0.248214
51.1	0.475794	1.0632	-0.358666	-0.113669	-0.323488	0.813017	-0.31371	-0.0387325	1.04862	-0.3243	0.0885221	0.367417	-0.373383	-0.145953	0.661147	0.274235	-0.189941	0.760738	-0.447956	-0.70466	-0.651575	1.77381	-0.539541	-0.795027	0.0240626	-0.430731	0.976891	-0.198805	0.166849	-0.0989674	0.109266	-0.186564	-0.334168	0.0618596	-0.488111	1.31529	-0.875794	-0.584586	-1.00201	-0.405076	-0.67048	-0.697643	0.158522	-0.0328627
51.2	0.455621	0.755781	-0.445439	-0.22622	-0.182051	0.750776	-0.558239	-0.219218	1.03609	-0.28429	-0.353387	0.458516	-0.39284	-0.223253	0.427652	0.326497	-0.21984	0.750945	-0.231792	-0.596832	-0.704376	1.58251	-0.0441826	-0.472871	0.0993431	-0.370803	0.890972	-0.523425	-0.132135	-0.372519	0.552662	-0.18178	-0.36893	0.195609	-0.550076	1.08068	-0.671736	-0.70487	-0.339838	-0.388035	-0.624615	-0.635195	0.445368	0.373239
51.3	0.507036	0.692188	-0.335295	-0.133612	-0.14008	0.651443	-0.242832	-0.110895	0.827838	-0.268814	-0.269148	0.400796	-0.353459	-0.202933	-0.0398276	0.260753	-0.313818	0.73506	-0.312005	-0.752104	-0.720508	1.78848	-0.379974	-0.751438	0.231211	-0.281152	1.0043	-0.306778	0.141516	-0.313743	0.170424	0.118465	-0.403992	0.0681325	-0.571704	0.856513	-0.693049	-0.699187	-0.465424	-0.526733	-0.864884	-0.871444	-0.100294	0.0102419
51.4	0.466643	0.659307	-0.336642	-0.184512	-0.0953648	0.595824	-0.0542779	-0.076144	0.726948	-0.308638	-0.460131	0.36311	-0.330992	0.0137917	0.291741	-0.225706	-0.295893	0.408071	-0.301557	-0.666463	-0.769149	1.89438	-0.224907	-0.68102	0.0587501	-0.190383	0.998338	-0.0635171	0.00933655	-0.214755	0.29694	0.348345	-0.426432	0.0328077	-0.596072	0.831073	-0.688317	-0.517427	-0.772438	-0.427754	-0.649058	-0.685668	-0.0337471	0.380263
51.5	0.360285	0.637726	-0.318402	-0.139975	0.023083	0.684698	-0.295546	-0.374276	0.619605	-0.166228	-0.469165	0.0431062	-0.433819	-0.279888	0.484576	0.22427	-0.24899	0.720241	-0.367063	-0.770631	-0.732491	1.99687	-0.274825	-0.675085	-0.149406	-0.1428	0.993695	-0.349035	0.319676	-0.013787	0.0356402	0.857846	-0.526803	-0.197188	-0.582283	0.898659	-0.58759	-0.678252	-0.50967	-0.45079	-0.633919	-0.322798	-0.25674	0.127255
51.6	0.215334	0.700137	-0.284555	-0.113097	-0.0419991	0.605619	-0.403964	-0.244773	1.37538	-0.385843	-0.495626	-0.175712	-0.43925	-0.23606	0.343707	0.180856	-0.299999	0.440338	-0.297074	-0.714159	-0.736964	1.77583	-0.557601	-0.618452	0.196721	-0.398741	0.735854	-0.464309	0.12084	0.062523	0.40979	1.22633	-0.362043	-0.0964073	-0.593255	0.866264	-0.489334	-0.731349	-0.924287	-0.579983	-0.720686	-0.728858	-0.269087	0.11435
51.7	0.287531	0.484475	-0.323853	-0.174863	-0.180314	0.583669	-0.313693	-0.137864	2.9331	-0.288112	-0.0436944	0.0431551	-0.393151	-0.198881	0.223618	0.0621225	-0.268372	-0.22689	-0.379874	-0.204431	-0.667159	1.96632	-0.499553	-0.673333	0.409697	-0.238212	0.611707	-0.364131	0.0749358	0.0113598	0.807309	1.09066	-0.219448	-0.34134	-0.313106	0.556566	-0.517195	-0.526412	-0.581086	-0.548492	-0.772793	-0.442514	-0.211484	0.182147
51.8	0.257955	0.642967	-0.225653	-0.101545	0.0111001	0.466015	-0.537473	-0.150625	4.26863	0.690688	-0.567949	0.650167	-0.430023	-0.19912	0.0522047	0.00679661	-0.267991	-0.0481314	-0.343817	-0.465938	-0.763177	2.21675	-0.418288	-0.482513	0.0458331	-0.344859	0.418471	-0.147584	0.116052	0.0353457	2.03974	1.32994	-0.467251	0.10971	-0.477505	0.682333	-0.146866	-0.585089	-0.279074	-0.496834	-0.884506	-0.615218	-0.325595	-0.105816
51.9	0.293156	0.828296	-0.399593	-0.148783	0.034377	0.609366	-0.614253	-0.0412505	6.42317	0.678507	-0.380788	0.901616	-0.391804	-0.309824	0.0878082	-0.0978164	-0.23885	-0.468745	-0.333982	-0.811009	-0.79713	2.32025	-0.237625	-0.464573	0.0856635	-0.0208025	0.414196	-0.21153	-0.0609656	-0.30027	2.54919	1.15986	-0.590036	-0.0742167	-0.585742	0.92364	-0.0365491	-0.716872	-0.244946	-0.53268	-0.752449	-0.736303	-0.0896221	0.0250154
52	0.225939	0.839251	-0.192821	-0.118015	-0.119484	0.503965	-0.118693	0.146068	7.73889	0.498188	-0.234566	0.783809	-0.435743	-0.145172	-0.0924885	0.292566	-0.14901	-0.308992	-0.406385	-0.764299	-0.834442	1.98201	-0.342427	-0.450098	0.0115624	-0.1876	0.398124	0.243206	-0.2125	0.0304222	2.1899	1.29481	-0.504784	-0.0731046	-0.577191	0.84162	0.0905772	-0.697387	-0.316578	-0.438002	-0.534073	-0.43523	-0.179161	-0.0355522
52.1	0.282681	0.883436	-0.404277	-0.18063	0.0451174	0.527421	0.0349329	-0.0262891	8.63301	0.648778	-0.120761	0.704788	-0.416561	-0.173146	-0.106206	-0.0233026	-0.105572	-0.0717843	-0.220242	-0.550676	-0.844529	2.135	-0.130282	-0.449667	0.121234	0.0428904	0.537545	-0.159903	0.161244	0.0814288	1.89781	1.04617	-0.587567	0.0398152	-0.60979	0.878349	0.00788034	-0.613052	-0.148871	-0.432192	-0.669074	-0.186407	-0.234799	0.0944743
52.2	0.188296	0.79098	-0.333931	-0.0654377	-0.0730857	0.994182	-0.262582	-0.13787	9.35982	0.313314	-0.217911	0.834241	-0.410632	-0.262465	-0.179908	0.124127	-0.122835	-0.126876	-0.362603	-0.311387	-0.941333	2.17628	-0.307012	-0.584428	0.096918	0.1907	0.512215	-0.300856	0.206476	0.0529847	2.77612	1.0869	-0.604751	0.338204	-0.637732	1.17496	0.187627	-0.740406	-0.0779929	-0.521181	-0.308209	-0.312916	0.034773	0.247164
52.3	0.32471	0.758963	-0.249134	-0.0732414	-0.157727	0.811323	-0.501659	-0.474246	9.6734	0.119646	-0.422499	0.739943	-0.404013	-0.276398	-0.141975	-0.0164216	-0.275989	-0.266384	-0.412933	-0.564019	-0.973995	2.1458	-0.000783823	-0.481313	-0.0829505	0.139522	0.314901	0.400135	-0.11998	0.054198	3.24164	0.865409	-0.41267	0.154269	-0.556717	1.33108	-0.019838	-0.582998	-0.333691	-0.397668	-0.564423	-0.121927	-0.453915	0.251561
52.4	0.837139	0.791745	-0.259078	-0.0986448	-0.158507	1.03024	-1.04537	-0.214923	9.7621	0.325948	-0.541071	0.682591	-0.369602	-0.223893	0.137824	0.0229649	-0.00441716	-0.221353	-0.46259	-0.746643	-0.79674	2.57434	-0.427006	-0.575987	0.0332571	0.28422	0.47879	0.147938	-0.223461	-0.127328	3.66805	0.774659	-0.59808	0.111492	-0.640341	1.21446	0.0943762	-0.744867	-0.164075	-0.499185	-0.456193	-0.118478	-0.187487	0.280103
52.5	1.01042	0.693971	-0.303626	-0.0270903	-0.0996546	0.831808	-0.605352	-0.380774	9.56571	0.000484862	-0.4711	0.776933	-0.35524	-0.192539	0.760454	0.254653	-0.0602767	0.105789	-0.347545	-0.851773	-0.759112	2.90556	-0.621583	-0.533794	-0.0533987	0.0528594	0.288803	-0.170312	-0.205037	-0.288209	3.13271	0.84199	-0.237719	0.369171	-0.522147	1.18361	-0.103478	-0.70597	-0.315107	-0.432669	-0.33376	-0.286539	-0.166497	0.249619
52.6	1.53458	0.69037	-0.1359	0.0679872	-0.115781	1.17108	-0.779971	-0.263202	9.65235	-0.0493163	-0.190716	0.891801	-0.346572	-0.262605	0.170156	-0.171583	0.000786178	-0.872485	-0.251766	-0.670128	-0.714258	2.81954	-0.114071	-0.515311	-0.084335	-0.236846	0.243525	0.255574	0.0872798	-0.029969	2.96993	0.721057	-0.388072	0.287246	-0.625967	1.79728	-0.0237439	-0.690682	-0.263502	-0.378336	-0.67823	-0.412722	0.012257	0.394047
52.7	1.80238	0.640908	-0.279454	-0.00888802	-0.118566	1.50752	-0.608223	-0.255541	9.6793	-0.0693043	-0.424757	0.857378	-0.423964	0.0121086	0.0580506	0.271237	-0.118931	-0.108885	-0.500472	-0.633713	-0.841359	2.95065	-0.148665	-0.4798	-0.129396	-0.482153	0.111003	-0.054957	-0.0669212	0.0447937	3.24786	0.839909	-0.434114	0.299375	-0.575316	1.85984	0.0468165	-0.761124	-0.723689	-0.453896	-0.411778	-0.34756	-0.281946	0.609521
52.8	1.91314	0.56604	-0.228731	-0.0175574	-0.34914	1.37858	-1.12395	-0.422219	10.1813	-0.0943809	-0.300594	0.855482	-0.438231	-0.244092	0.104789	0.267958	0.188392	-0.158464	-0.353188	-0.456455	-0.913897	2.94956	-0.0302633	-0.636877	0.0644894	-0.215714	0.276593	0.260539	-0.203238	-0.392599	3.71159	0.526294	-0.524187	0.169905	-0.717939	1.8706	0.04692	-0.696694	-0.64186	-0.42717	-0.220992	-0.337323	-0.100756	0.0931506
52.9	2.00954	0.508993	-0.379011	-0.0395433	-0.174239	1.29907	-1.26591	-0.311264	10.348	-0.134969	-0.782921	1.41624	-0.39774	-0.218819	-0.21252	-0.114471	-0.117534	-0.435284	-0.428103	-0.715617	-0.892692	2.69156	-0.260602	-0.315325	-0.0987988	-0.129876	0.406647	0.368571	0.12688	0.101338	3.76957	0.56385	-0.535731	0.267276	-0.639513	1.8584	0.0664119	-0.689057	-0.502761	-0.351299	-0.268531	-0.263286	-0.058078	0.226358
53	2.01352	0.431436	-0.312095	-0.0609167	-0.0559055	0.977272	-0.772459	-0.329905	10.2594	-0.271092	-0.415863	1.08221	-0.369498	-0.0919647	0.164265	-0.0755945	-0.140411	-0.222837	-0.254221	-0.740162	-0.832855	3.05596	-0.0601118	-0.520045	-0.01039	-0.102441	0.58404	0.0393281	-0.0120571	0.0603459	3.3497	0.347	-0.363298	0.353233	-0.749865	1.8109	0.204947	-0.709298	-0.440324	-0.395086	-0.249787	-0.465528	-0.0311554	0.311883
53.1	2.05693	0.433647	-0.416792	-0.00914529	0.0631651	1.23289	-0.856935	-0.427185	10.4074	-0.208302	-0.145841	1.05321	-0.426588	-0.101588	0.411854	0.232311	-0.0207729	-0.202559	-0.161593	-0.88669	-0.851119	3.37563	-0.119763	-0.385043	0.0110567	-0.18313	0.334811	0.219084	-0.167969	-0.220515	3.66431	0.282714	-0.382335	0.302883	-0.721847	1.94532	0.0143559	-0.553617	0.041058	-0.416905	-0.62696	-0.339681	-0.159146	0.0124156
53.2	2.13636	0.385385	-0.268888	-0.0583615	-0.190236	1.10035	-0.542733	-0.66586	10.5259	-0.275544	-0.298957	0.974825	-0.428915	-0.189232	0.135972	0.135885	0.011859	-0.545928	-0.437184	-0.572002	-0.892211	3.53211	-0.0907069	-0.494536	0.230148	-0.0453181	0.291973	0.208298	0.224565	0.0458332	3.71209	0.326507	-0.635498	0.380486	-0.627092	1.64338	0.0883967	-0.675468	-0.404007	-0.429722	-0.352649	-0.337089	-0.107907	0.202112
53.3	2.22949	0.229124	-0.379456	-0.016318	-0.130976	0.950321	-0.638835	0.0105816	10.8089	-0.349473	0.0356204	1.14516	-0.413381	-0.271594	0.152654	0.468039	0.0343612	-0.457387	-0.51027	-0.67266	-0.916881	3.25871	-0.013216	-0.0823317	0.176481	-0.528237	0.279489	0.396579	0.0957235	-0.0953644	3.39744	0.216081	-0.513952	-0.0317725	-0.711224	1.4222	0.331837	-0.576367	-0.348475	-0.579557	-0.468676	-0.396235	-0.285331	-0.0806109
53.4	2.09371	0.157258	-0.345959	0.0413778	-0.270304	1.16105	-0.626214	-0.40935	10.2994	-0.314625	-0.565859	0.870778	-0.441582	-0.137883	0.335722	0.38881	-0.101277	-0.291759	-0.502663	-0.779741	-0.850093	3.41328	-0.275709	-0.448337	0.198006	-0.205583	0.163923	-0.0186978	0.0151487	-0.280707	3.09547	0.22176	-0.378966	0.0472554	-0.528413	1.84383	0.0286434	-0.58128	-0.195568	-0.502057	-0.639204	-0.290003	-0.255661	-0.128177
53.5	1.94391	0.229637	-0.423677	0.0333604	0.0612154	0.848922	-0.474691	-0.327555	10.0681	-0.352085	-0.347779	1.14554	-0.386369	-0.133507	0.142999	0.127179	-0.00956672	-0.358455	-0.385515	-0.573593	-0.785692	2.67361	-0.0267132	-0.25496	-0.0234217	-0.133914	0.135604	-0.100843	0.15406	-0.2393	3.41274	0.217975	-0.134586	0.0542378	-0.683796	1.50866	0.0132595	-0.698431	-0.297579	-0.465307	-0.412039	-0.787282	0.0534015	0.0990987
53.6	1.52342	0.144927	-0.490019	-0.0867682	-0.0894724	0.784485	-0.803965	-0.260135	9.84993	-0.387594	-0.273945	0.985182	-0.434634	-0.15269	0.198028	0.121329	-0.0339484	-0.657399	-0.255076	-0.970778	-0.778449	2.66643	-0.35241	-0.470625	0.0485646	-0.675147	-0.029496	-0.174738	0.0957835	-0.245939	2.77813	-0.107775	-0.558788	-0.0694325	-0.710079	1.68027	-0.011101	-0.707317	-0.330473	-0.442314	-0.42859	-0.577556	-0.388779	0.0384817
53.7	1.71069	0.126757	-0.281677	0.0362905	0.049007	0.755735	-0.253328	-0.103537	9.81333	-0.23696	-0.417072	0.724617	-0.449525	-0.257529	-0.126405	0.0894216	-0.257939	-0.325634	-0.464128	-0.727888	-0.811472	3.06655	-0.306495	-0.523161	0.286662	-0.342723	-0.042277	-0.216374	0.00711062	0.0593154	3.04403	-0.0893216	-0.501163	0.0997852	-0.501625	1.5016	-0.0460987	-0.571373	-0.445387	-0.48034	-0.92753	-0.490265	-0.149979	-0.0443709
53.8	1.57778	0.206861	-0.39492	-0.112725	0.0499681	0.598985	-0.282263	-0.381099	9.65556	-0.290088	-0.373538	0.834858	-0.391617	-0.17762	0.225451	0.0970186	-0.174086	-0.344387	-0.283821	-0.620059	-0.817367	2.9033	-0.284619	-0.486061	0.241484	-0.49989	-0.0843866	-0.480689	-0.128749	-0.0770745	2.25404	-0.0973343	-0.425132	-0.0686039	-0.555195	1.38252	-0.233624	-0.676917	-0.845724	-0.462672	-0.687821	-0.923343	0.100599	-0.101776
53.9	1.43871	0.250971	-0.371775	-0.0376072	-0.0185055	0.360792	-0.592636	-0.0283761	9.35755	-0.396185	-0.584323	0.611704	-0.359641	-0.253887	0.436231	0.135692	-0.180726	-0.063867	-0.552365	-0.629528	-0.836618	2.94644	-0.0427131	-0.436652	0.189464	-0.15583	-0.195594	-0.283302	-0.176047	0.192158	2.74032	-0.0395324	-0.465536	-0.1201	-0.630511	1.39849	-0.194484	-0.681857	-0.617703	-0.461284	-0.680116	-0.998345	-0.345621	0.287665
54	1.3353	0.160551	-0.449262	-0.104324	-0.234548	0.484367	-0.143448	-0.238089	10.1544	-0.386049	-0.434959	0.928221	-0.427683	-0.0350721	-0.336329	0.147881	-0.238656	-0.0614485	-0.49064	-0.874072	-0.920654	2.30108	-0.306072	-0.532634	0.287397	-0.373193	-0.131173	-0.472652	0.0979791	0.124001	2.69627	0.145618	-0.470485	-0.124801	-0.454301	1.61377	-0.232923	-0.832401	-0.689691	-0.475575	-0.472207	-0.533962	0.0289955	0.177296
54.1	1.37864	0.150512	-0.257027	-0.0708326	0.0978364	0.737277	-0.522544	-0.152905	9.98788	-0.427633	-0.504439	1.19836	-0.421989	-0.175487	-0.0524027	-0.0957276	-0.376148	-0.304374	-0.413787	-0.766666	-0.892121	2.99225	-0.128898	-0.556208	-0.0111026	-0.421483	-0.228139	0.306055	-0.123625	-0.0817022	2.57946	0.162676	-0.458551	0.145701	-0.679747	1.55624	-0.219892	-0.509762	-0.426562	-0.539257	-0.416922	-0.710003	0.0723042	0.123789
54.2	1.26007	0.0387917	-0.33429	-0.0441111	-0.0713958	0.664597	-0.069706	-0.335849	10.0429	-0.378624	-0.758845	1.06515	-0.364792	-0.347506	0.0636995	0.0338141	-0.138328	-0.312636	-0.483869	-0.866682	-0.969709	3.1987	-0.399873	-0.735228	0.0390472	-0.0405578	-0.113155	-0.14845	0.400787	0.277514	2.65332	-0.170131	-0.316631	0.13787	-0.661528	1.64919	-0.135489	-0.755732	-0.478304	-0.601565	-0.551552	-0.662065	-0.0675607	0.444408
54.3	1.11892	0.179167	-0.35155	-0.106587	-0.052468	0.672784	-0.330808	-0.283574	10.1985	-0.41554	-0.364643	1.18025	-0.360209	-0.151188	0.0623258	0.0353761	-0.280529	0.353783	-0.385153	-1.02878	-0.884667	2.55278	-0.353358	-0.555658	-0.0745806	-0.371679	-0.0605611	-0.439645	0.151067	-0.0232373	2.9329	0.101077	-0.291318	0.0527006	-0.600788	1.28831	-0.0372998	-0.647576	-0.77575	-0.540845	-0.258474	-0.703257	0.149006	0.169579
54.4	1.08681	0.100903	-0.42349	-0.0646282	0.1174	0.753239	-0.446562	-0.0310856	10.0857	-0.596509	-0.269009	0.929592	-0.396032	-0.135097	-0.203264	0.194281	-0.377384	-0.185287	-0.444244	-0.612452	-0.876372	2.62317	0.0344109	-0.661622	0.401715	-0.528006	-0.135673	-0.195094	0.00313487	0.0683288	2.40265	-0.0144059	-0.158984	0.0746658	-0.599456	1.28194	-0.204476	-0.743463	-0.665984	-0.478416	-0.419365	-0.695486	-0.131794	0.0504192
54.5	1.04415	0.0479642	-0.276645	-0.0756634	-0.0634812	0.248061	-0.423406	-0.288002	10.2265	-0.355121	-0.392893	0.478732	-0.351507	-0.221331	-0.0393714	0.312004	-0.272583	-0.164409	-0.373693	-0.50948	-0.831684	2.3833	-0.513299	-0.477534	0.0612425	-0.301301	-0.147313	-0.0780139	0.0114388	-0.198276	2.99242	0.164997	-0.40298	-0.0197483	-0.59976	1.17874	-0.17453	-0.644433	-0.396704	-0.479391	-0.576364	-0.751175	0.422011	0.295251
54.6	0.960163	0.076765	-0.277621	-0.18289	-0.0249075	0.418935	-0.17388	-0.0820166	10.0287	-0.429263	-0.149797	0.918057	-0.367168	-0.134869	-0.255413	-0.0354605	-0.234969	-0.0654631	-0.575921	-0.787978	-0.834598	2.78472	-0.0677191	-0.250063	0.0971093	-0.0653724	-0.0714546	0.00824076	0.12828	0.145433	2.65332	-0.0152673	-0.316435	-0.0949198	-0.605202	1.4521	0.122804	-0.48117	-0.135027	-0.473201	-0.809837	-0.631922	0.358837	0.0506947
54.7	1.05305	0.585948	-0.409153	0.0138723	0.0114085	0.339137	-0.0585946	-0.132581	10.3024	-0.361068	-0.088221	0.981971	-0.370014	-0.115499	-0.162211	0.174069	-0.269812	-0.515993	-0.381006	-0.721651	-0.799556	2.67863	-0.317458	-0.287477	0.109353	0.0995804	-0.0844204	-0.00470568	0.138908	0.255576	2.48591	0.198925	-0.049669	0.080701	-0.637944	1.57164	0.148191	-0.688071	-0.603427	-0.436642	-0.538775	-0.557324	-0.0178725	0.338734
54.8	0.946184	0.764598	-0.320127	-0.0471361	0.0867498	0.224547	-0.232483	-0.400458	10.3727	-0.451923	-0.358745	0.856241	-0.419447	-0.0940539	-0.161805	0.345245	-0.0143384	-0.367108	-0.329967	-0.362494	-0.857371	2.54337	-0.37997	-0.412648	0.197357	0.109829	-0.0313332	0.0180159	-0.184323	-0.096343	2.4556	-0.3152	-0.248505	0.0551504	-0.529112	1.64985	0.165376	-0.714949	-0.12073	-0.404624	-0.467091	-0.750173	-0.0630229	0.0524163
54.9	0.989436	0.810881	-0.37042	-0.10908	-0.113127	0.326904	-0.0565961	-0.117147	10.0957	-0.467432	-0.287299	0.948318	-0.376695	-0.129827	0.124337	0.646252	0.0195756	0.0481858	-0.323604	-0.874883	-0.775937	2.79454	0.079791	-0.351868	0.262475	-0.541747	-0.0334569	-0.494197	0.263222	0.127715	2.64139	-0.00178996	-0.336474	0.0218187	-0.537564	1.61128	0.0781999	-0.627643	-0.369619	-0.45098	-0.25823	-0.74077	0.0615775	0.105359
55	1.14505	0.792532	-0.44406	-0.0748215	-0.0268817	0.217485	-0.297086	-0.0580419	10.6105	-0.45442	-0.459474	1.34499	-0.36974	-0.127991	-0.0979403	0.284004	0.205977	-0.318331	-0.368096	-0.822109	-0.80971	2.46556	0.0632246	-0.483407	0.373038	-0.217219	-0.0264557	-0.281136	0.589819	0.135299	2.65474	-0.0790513	-0.377566	0.122649	-0.653572	1.40425	0.213194	-0.640223	-0.532545	-0.42991	-0.533654	-0.652712	0.490438	-0.102989
55.1	0.95282	1.06029	-0.385977	-0.107649	-0.137401	-0.289369	-0.958297	-0.080418	10.7367	-0.452316	-0.183547	0.662362	-0.385353	0.0489169	-0.116411	0.0517005	-0.0143334	-0.147128	-0.223964	-1.08476	-0.783088	2.32105	-0.122682	-0.46465	0.0887446	-0.00495072	0.999024	-0.0359749	0.179524	0.0541861	2.69985	-0.058394	-0.244806	0.152236	-0.555712	1.25284	0.171862	-0.75647	-0.345454	-0.46808	-0.445589	-0.612338	-0.0753015	0.326123
55.2	0.979708	0.964127	-0.500216	-0.0560492	-0.140091	0.118898	-0.940654	-0.116746	10.4789	-0.371616	-0.104985	0.806669	-0.361307	-0.0107978	0.177378	0.457793	-0.0138454	-0.324673	-0.349412	-0.94623	-0.763294	2.20084	0.0783738	-0.625435	-0.0543235	-0.0999841	2.61134	0.00716094	0.12134	0.103815	2.54882	-0.34662	-0.331325	-0.0797231	-0.342167	1.04142	0.148826	-0.691831	-0.483103	-0.515484	-0.525558	-0.552094	-0.11341	0.293209
55.3	0.943687	0.961812	-0.44855	-0.118876	-0.0182022	0.0312033	-1.05353	0.0307195	10.3033	-0.296503	-0.736892	0.71761	-0.426473	-0.0882135	-0.116473	0.45709	-0.0314927	-0.0870999	-0.245947	-0.925229	-0.87619	2.15147	-0.0884556	-0.573113	0.0855108	-0.314941	2.98675	-0.24883	0.113049	0.318848	2.60894	-0.250237	-0.170312	0.117114	-0.445416	0.933333	0.156173	-0.737158	-0.297548	-0.516221	-0.586074	-0.817141	-0.0147948	0.151084
55.4	1.01599	0.724194	-0.454447	-0.0505437	-0.0410704	0.103046	-0.858801	-0.401974	10.0341	-0.45722	-0.252065	0.57454	-0.418402	-0.0706273	-0.212456	0.724152	0.0695361	0.104437	-0.448313	-1.37408	-0.860169	2.24722	-0.394008	-0.332855	0.0184354	0.210445	2.95018	0.0886689	0.126906	0.291622	3.27949	-0.321306	-0.224478	-0.0976356	-0.562657	0.966857	-0.126451	-0.759724	-0.370001	-0.452947	-0.62037	-0.699309	-0.19231	-0.321213
55.5	0.918936	0.794902	-0.339701	-0.226329	-0.0994384	0.137698	-0.409299	-0.0141331	10.2569	-0.453038	-0.48849	0.579508	-0.400013	-0.0604158	-0.0894894	0.363599	0.156587	-0.543155	-0.261881	-1.14504	-0.701027	2.28977	0.0356277	-0.62917	-0.041293	0.00647402	3.05662	-0.160287	0.104758	-0.0384393	3.18226	-0.270807	-0.37447	0.076782	-0.411828	0.953653	0.000407708	-0.639214	-0.386224	-0.465262	-0.643276	-0.699659	0.143364	-0.0739927
55.6	0.848169	0.673671	-0.228112	-0.186186	-0.0565693	0.135279	-0.477013	-0.278758	10.2827	-0.447052	-0.329145	1.04271	-0.32013	-0.0843712	-0.146464	0.44858	0.109038	-0.0118427	-0.387113	-1.02156	-0.715495	1.95451	-0.298795	-0.419757	-0.0664862	-0.0828884	3.06618	-0.195245	0.0254127	-0.16307	2.37327	-0.360247	-0.479479	-0.111696	-0.537054	0.976303	0.170805	-0.717281	-0.615699	-0.399638	-0.582956	-0.725703	0.111244	-0.075624
55.7	0.914256	0.544895	-0.323034	-0.155401	-0.030358	0.35502	-0.683883	-0.0602406	10.1856	-0.534933	-0.504235	0.68728	-0.356959	-0.19132	-0.0430667	0.54042	0.0358615	-0.201235	-0.353691	-1.07943	-0.73775	1.64434	-0.154268	-0.373293	0.296367	-0.166375	3.08154	-0.0327923	-0.0803083	0.0578332	3.04233	-0.152203	-0.111941	-0.0808686	-0.508751	0.832537	0.183477	-0.583557	-0.674592	-0.427028	-1.0929	-0.752735	0.0148487	0.0586488
55.8	1.18488	0.701368	-0.402052	-0.160527	-0.0576246	0.247929	-0.882497	-0.0865568	9.86915	-0.368351	-0.432167	0.92131	-0.382519	-0.160062	-0.204299	0.40256	0.203793	-0.0104846	-0.296121	-1.42618	-0.902026	1.45924	-0.458531	-0.572989	0.0923446	-0.34662	2.95426	0.31973	0.311551	0.298375	3.68949	-0.0496567	-0.338112	-0.184613	-0.533441	0.504542	0.0521618	-0.682123	-0.637902	-0.385537	-0.640945	-0.731494	0.270514	0.147581
55.9	1.14011	0.493038	-0.404179	-0.201635	0.00289494	0.380957	-0.586576	-0.168576	10.0224	-0.562388	-0.404017	0.846224	-0.39529	-0.10443	-0.0541628	0.320483	0.0118915	-0.0845961	-0.322251	-1.1707	-0.755382	1.48993	-0.188226	-0.622775	0.182882	-0.000294182	2.87736	0.241291	-0.0358621	0.360046	3.8723	-0.200459	-0.421424	0.017439	-0.558191	0.568794	-0.10666	-0.667793	-0.585231	-0.562877	-0.636666	-0.685203	0.284022	0.415172
56	1.01421	0.474254	-0.367056	-0.221615	0.0879457	0.540391	-0.663491	-0.0776789	9.99705	-0.385195	-0.790297	0.819074	-0.395823	-0.198271	-0.123945	0.418419	0.0699844	0.167447	-0.309939	-0.865322	-0.811592	1.20153	-0.105701	-0.440617	0.14973	-0.353099	3.16198	0.0379073	-0.069643	-0.0519746	3.68681	-0.0909751	-0.268222	-0.0990733	-0.569687	0.468493	0.0961287	-0.642323	-0.850349	-0.495679	-0.636948	-0.688054	0.24843	0.128756
56.1	0.973597	0.726536	-0.439264	-0.211451	-0.107223	0.363244	-0.606295	-0.0580807	9.55241	-0.345933	-0.688844	0.763316	-0.365431	-0.022614	-0.352879	0.704766	0.133839	-0.440685	-0.28787	-0.881855	-0.687198	1.37207	-0.193735	-0.577419	0.254707	-0.378793	3.04168	0.551825	-0.239343	0.0700133	3.93329	-0.134936	-0.501145	0.0579717	-0.477833	0.64016	-0.0210371	-0.663079	-0.335705	-0.397642	-0.570559	-0.753848	0.244907	0.265343
56.2	0.895829	0.981841	-0.233365	-0.0863527	0.117779	0.392743	-0.806579	-0.391459	9.20888	-0.463311	-0.511153	0.117069	-0.400697	-0.0333766	0.188948	0.31634	0.0724509	-0.264681	-0.184005	-1.19953	-0.755202	0.908842	0.164734	-0.591921	0.121894	-0.0893477	2.85103	0.392387	-0.141019	0.362114	4.11554	-0.158636	-0.275407	-0.107009	-0.476875	0.487562	-0.102415	-0.742675	-0.456795	-0.39797	-0.343539	-0.672263	0.151268	0.0941851
56.3	0.856114	0.955815	-0.365663	-0.278685	0.190251	0.584117	-0.50094	-0.378485	9.05864	-0.218537	-0.278684	0.831166	-0.380032	0.0381691	0.0538101	0.205328	0.0309595	-0.0269992	-0.165874	-0.729103	-0.807375	0.700759	-0.251597	-0.526012	-0.0180446	-0.525851	2.75491	0.156449	0.170921	0.337745	3.47151	-0.495432	-0.384856	-0.0446567	-0.553099	0.806866	0.0911966	-0.810984	-0.887815	-0.396394	-0.20555	-0.86402	0.0738609	0.150029
56.4	0.763691	0.899875	-0.373779	-0.212854	0.0838931	0.796357	-1.02243	-0.161374	9.18484	-0.308793	-0.326836	0.595035	-0.340368	0.0332903	-0.359351	0.391478	-0.00257477	-0.252064	-0.423814	-0.828945	-0.765168	0.834365	-0.355742	-0.542337	0.202645	0.0575936	2.71737	0.343142	0.0507017	0.308895	4.20547	-0.454142	-0.614114	0.0984785	-0.510064	1.03201	-0.274011	-0.61297	-0.378399	-0.283233	-0.368927	-1.0392	0.496657	0.290017
56.5	0.775609	0.837893	-0.313738	-0.234645	-0.122447	0.422446	-1.28749	0.181616	9.08078	-0.457816	-0.425734	0.231058	-0.349656	-0.146132	-0.200852	0.424029	-0.199494	-0.0440571	-0.195683	-1.15723	-0.795944	0.93366	-0.300288	-0.521059	0.352267	-0.467139	2.73895	0.234278	0.00189206	0.257409	3.8941	-0.306393	-0.204875	-0.0846745	-0.406598	0.737226	-0.126074	-0.61393	-0.600919	-0.440796	-0.631608	-0.819775	0.218213	0.0435486
56.6	1.02992	0.716998	-0.068059	-0.178657	0.0757924	0.672579	-1.32672	-0.334188	8.71618	-0.387469	0.0649377	0.326965	-0.334525	-0.0411675	-0.30307	0.199302	-0.021315	-0.151812	-0.275931	-1.01229	-0.695118	1.21298	-0.193673	-0.406424	0.116944	-0.20334	2.97944	0.106143	-0.043591	0.11522	3.94072	-0.371876	-0.180758	0.0557261	-0.519454	0.605398	-0.116154	-0.574435	-0.771913	-0.386281	-0.492767	-0.718399	-0.0220841	0.196225
56.7	1.1128	0.843681	-0.170091	-0.305229	0.153007	1.10732	-1.10932	-0.34016	8.51577	-0.391747	-0.373869	0.272695	-0.328474	-0.182018	-0.248743	0.215956	-0.251381	-0.299496	-0.15943	-0.866678	-0.814277	1.00234	-0.275984	-0.631644	0.252964	0.185174	2.57802	0.162426	0.253189	0.120336	3.78353	-0.373893	-0.181457	0.0332855	-0.585925	0.410527	-0.0681298	-0.56449	-0.739082	-0.273366	-0.666777	-0.907796	0.0547805	0.154509
56.8	1.11587	0.790425	-0.473693	-0.196901	0.114297	0.818616	-1.62816	-0.110031	8.1105	-0.24681	-0.112818	0.272249	-0.345373	-0.109877	-0.0288328	0.490899	-0.0481685	-0.37003	-0.283119	-0.845417	-0.727238	0.992102	-0.478557	-0.591032	0.177856	-0.0255152	2.58987	0.059814	0.166902	0.265001	3.73136	-0.472054	0.0154186	-0.0404626	-0.425393	0.515923	-0.0932401	-0.566623	-0.732753	-0.438702	-0.289978	-0.706758	-0.317298	-0.113621
56.9	1.02265	0.761557	-0.416162	-0.189611	0.0165132	0.642711	-0.826087	-0.238527	7.82847	-0.336955	-0.229785	0.703569	-0.347491	-0.100737	0.251932	0.461066	-0.150304	-0.484666	-0.371755	-0.935214	-0.83705	0.770651	-0.418491	-0.454325	0.175547	-0.412512	2.44747	0.269458	0.281057	0.155531	3.82227	-0.219049	-0.256195	-0.0301401	-0.635079	0.599409	0.105966	-0.474668	-1.00128	-0.409767	-0.196502	-0.805739	0.185499	0.12801
57	0.991858	0.836303	-0.0690713	-0.204958	-0.0664845	0.591904	-0.780829	-0.257228	7.49868	-0.507248	-0.253153	0.461496	-0.287912	-0.109608	-0.0469172	0.642607	-0.150861	-0.411076	-0.289913	-0.917325	-0.753112	0.679778	-0.088799	-0.57688	0.129342	-0.168314	2.32822	-0.138261	0.232199	0.126152	3.98172	-0.215454	-0.21328	0.13908	-0.660069	0.481266	-0.163665	-0.711221	-0.949114	-0.282461	-0.333517	-0.971895	-0.280712	-0.112977
57.1	0.946131	0.953982	-0.212714	-0.231805	-0.237548	0.543489	-0.556932	-0.262232	7.26409	-0.364245	-0.224594	0.566938	-0.309013	-0.0563047	0.189228	0.45012	0.0609447	-0.0923048	-0.279413	-1.16003	-0.753006	0.623505	-0.46773	-0.440295	0.314828	-0.00552195	2.2997	-0.176954	-0.183122	0.0448474	3.40765	-0.212691	-0.204674	0.346508	-0.480447	0.621773	-0.190082	-0.681636	-0.749745	-0.366996	-0.52564	-0.734948	-0.194877	-0.0011716
57.2	0.92656	1.33642	-0.245871	-0.104413	0.179644	0.573094	-1.14596	-0.277925	6.97576	-0.369104	-0.000712381	0.426152	-0.361832	-0.214418	0.0636297	0.327627	-0.0384075	0.329296	-0.193642	-0.375966	-0.758813	0.826402	-0.0429201	-0.28421	-0.0501872	-0.455231	2.54822	-0.0983855	0.306037	0.137984	2.99043	-0.327315	-0.329597	0.303912	-0.433412	0.625591	-0.182212	-0.607422	-0.684457	-0.356081	-0.357403	-0.485716	-0.138326	0.0564597
57.3	0.732499	1.59399	-0.336237	-0.25669	0.120253	0.304174	-0.780768	-0.631653	8.07935	-0.227361	-0.332302	0.650632	-0.355281	-0.0544338	0.232085	0.508129	-0.142414	-0.36306	-0.267116	-0.858328	-0.765068	1.13266	-0.179658	-0.253505	-0.101088	-0.0310848	2.38694	0.176258	0.183302	0.156837	2.79727	-0.562588	-0.263619	0.174661	-0.489009	0.831822	-0.301522	-0.64977	-0.808455	-0.38787	-0.532908	-0.496556	0.15901	0.335573
57.4	0.64256	1.61368	-0.438326	-0.232463	0.0750937	0.458487	-0.677237	-0.564529	8.28314	-0.365216	-0.264639	0.425832	-0.347407	-0.17612	0.0824422	0.373721	-0.0160673	0.0618804	-0.0917992	-0.688046	-0.733252	1.17182	-0.239626	-0.323144	0.333783	-0.184754	2.43018	-0.131326	0.392469	0.141653	2.76384	-0.394375	-0.132039	0.389228	-0.477306	0.809595	-0.0901308	-0.564099	-0.486422	-0.391338	-0.399684	-0.474065	0.06697	0.0652575
57.5	0.738893	1.60895	-0.209348	-0.1629	0.225728	0.398135	-0.939528	-0.200207	8.40905	-0.332344	-0.305481	0.58495	-0.370329	-0.043071	0.414912	0.285411	-0.0846992	0.184179	-0.0808372	-0.771726	-0.786801	1.31832	-0.209002	-0.363785	0.023846	-0.440346	2.35239	-0.14975	0.0491559	0.287321	3.08194	-0.307767	-0.410276	0.541083	-0.414153	0.717796	0.034516	-0.538371	-0.576413	-0.347489	-0.64086	-0.503113	0.0963262	-0.00961569
57.6	0.446659	1.59016	-0.328531	-0.0988225	0.138901	0.67716	-0.431636	-0.121211	7.97076	-0.17307	-0.290396	-0.0570246	-0.350396	-0.109951	0.025913	0.322888	-0.203536	0.349745	-0.185585	-0.765107	-0.701151	1.27989	-0.132182	-0.290044	-0.0649064	-0.0680319	2.32722	-0.049501	0.303516	0.605355	2.83227	-0.544932	-0.374443	0.281776	-0.451565	0.61519	-0.015144	-0.522735	-0.481008	-0.318727	-0.595142	-0.487206	-0.285122	0.198462
57.7	0.573326	1.44056	-0.214343	-0.212649	0.222083	0.520158	-0.766756	-0.0314518	7.37496	-0.367602	-0.376594	0.263433	-0.318959	-0.169148	0.242458	0.542609	-0.205331	0.33494	-0.222117	-0.928641	-0.726065	1.08078	0.0514036	-0.375181	0.147187	-0.363853	2.32304	-0.23536	0.285681	0.156657	2.8795	-0.396388	-0.31053	0.278598	-0.452693	1.0049	-0.282858	-0.475161	-0.278845	-0.330959	-0.232025	-0.236328	0.153098	0.243192
57.8	0.666974	1.62127	-0.4241	-0.144158	0.00541303	0.90525	-0.596979	-0.243103	7.10553	-0.101644	0.28673	0.00842529	-0.308596	-0.224274	0.172465	0.261182	-0.00127021	0.205447	-0.116527	-0.792698	-0.692722	0.791396	0.247115	-0.290803	-0.0799452	-0.141744	2.40968	0.253308	0.509954	0.409829	2.51503	-0.329366	-0.130613	0.367183	-0.28211	1.03189	-0.0153153	-0.697162	-0.631077	-0.317282	-0.313255	-0.481176	0.281905	0.089609
57.9	0.571927	1.53751	-0.35955	-0.06116	0.0277344	0.849898	-0.475743	-0.057351	7.16975	-0.195534	-0.238516	0.341289	-0.325756	-0.166418	-0.00423824	0.431323	0.0838668	-0.0951584	-0.225944	-0.763389	-0.732164	1.23883	-0.373315	-0.333305	0.102662	-0.213272	2.14371	-0.0238696	0.431117	0.324929	2.70691	-0.338605	-0.197521	0.372185	-0.259656	0.762288	-0.173838	-0.518855	-0.417877	-0.355664	-0.397658	-0.271045	0.155194	0.169978
58	0.492586	1.42805	-0.359224	-0.270574	0.264892	0.741074	-0.295222	-0.0521224	6.78739	-0.351119	-0.104581	-0.304451	-0.322182	-0.000312492	0.446502	0.778114	0.282323	0.0586775	-0.277789	-0.853267	-0.63267	1.14003	-0.0997743	-0.399574	0.130623	0.0202313	2.12018	0.362358	0.207727	0.196813	2.52559	-0.362546	-0.119272	0.196902	-0.315373	0.802216	-0.0661077	-0.629436	-0.217649	-0.328868	-0.327627	-0.30355	0.228666	0.252286
58.1	0.527181	1.29612	-0.19982	-0.135066	0.179674	0.589805	-0.342809	-0.0658605	6.56492	-0.2414	-0.353713	-0.0211122	-0.344961	-0.0697667	-0.00398276	0.549231	0.191568	-0.0774503	-0.156479	-0.524063	-0.762132	0.892552	-0.168249	-0.330873	0.250244	-0.0681291	1.80754	0.285696	0.417958	0.0296778	2.38224	-0.296843	-0.0468411	0.0391781	-0.407009	0.755039	-0.195977	-0.500884	-0.554676	-0.308574	-0.335203	-0.477126	0.331683	-0.0437026
58.2	0.480141	1.24499	-0.283816	-0.195941	0.129263	0.48763	-0.477802	-0.110264	6.70261	-0.317697	-0.257286	-0.429547	-0.372565	0.0293966	0.0121353	0.656416	0.0999584	-0.0412322	-0.181509	-1.03503	-0.664143	0.746643	0.0755426	-0.276577	0.406239	-0.0296567	1.61763	0.0892219	0.396018	0.21926	2.53773	-0.437421	-0.146029	0.219593	-0.322182	0.598383	-0.204818	-0.364687	-0.220668	-0.397067	0.0761538	-0.332634	0.261584	0.130251
58.3	0.314915	1.15513	-0.0528361	-0.144531	0.0408336	0.270807	-0.599489	0.173635	6.95751	-0.250873	0.141181	-0.163769	-0.289957	-0.0750908	0.28306	0.134616	0.155671	-0.0924558	-0.233868	-0.707627	-0.781519	0.668622	-0.347776	-0.228569	0.0809208	-0.128822	1.39868	0.222446	0.0815363	0.532096	2.25396	-0.404976	-0.205278	0.428532	-0.336555	0.397326	-0.086193	-0.340581	-0.538336	-0.319444	-0.0733218	-0.377724	0.405376	0.0956559
58.4	0.439402	1.13128	-0.306937	-0.183102	0.351239	0.479428	-0.26633	-0.249822	6.57522	-0.25591	-0.00828031	-0.0257168	-0.287279	-0.0167601	0.0450741	0.39184	0.111236	-0.316724	-0.174375	-0.73056	-0.588982	0.681656	-0.180063	-0.319768	0.24659	0.0278002	1.36133	0.204158	0.582407	0.261071	1.87418	-0.325973	-0.239692	0.11786	-0.309667	0.505221	0.0451257	-0.35401	-0.386832	-0.366429	0.047418	-0.304053	-0.0843122	0.057254
58.5	0.406273	1.05053	-0.349707	-0.192304	0.146652	0.430141	-0.289239	0.10539	6.45753	-0.326717	-0.259215	0.0348278	-0.292148	-0.00027039	0.258279	0.677744	0.0640413	0.108165	-0.0772972	-0.469001	-0.727566	0.886814	-0.178916	-0.710146	0.24241	-0.270291	0.990225	-0.0347246	0.515199	0.0862303	2.126	-0.430535	-0.0837379	0.329185	-0.349352	0.345327	-0.293762	-0.394496	-0.12962	-0.35589	0.131981	-0.321998	0.0880487	0.238353
58.6	0.442148	0.890771	-0.296734	-0.254487	0.0633984	0.389614	-1.17012	-0.259932	6.23003	-0.304549	-0.450357	-0.176907	-0.324266	-0.017052	-0.176818	0.286614	-0.0255585	-0.231986	-0.210896	-0.740802	-0.641727	0.868763	-0.141749	-0.398893	0.22992	-0.348173	0.919402	0.39527	0.171905	0.456481	2.94673	-0.238237	-0.331804	0.483109	-0.254785	0.729695	-0.0551642	-0.24055	-0.476751	-0.383057	-0.0185073	-0.206806	0.356636	0.176269
58.7	0.338624	0.899503	-0.275253	-0.188949	0.296945	0.530758	-0.718028	-0.276093	6.09003	-0.303098	-0.319902	-0.0850999	-0.340565	-0.122378	0.118062	-0.061236	-0.0393806	-0.0127119	-0.143975	-0.731523	-0.653635	0.980237	0.0824609	-0.394601	0.318345	-0.204321	0.761199	0.200835	0.182068	0.507491	2.00521	-0.429204	-0.0861586	0.177639	-0.292382	0.90544	-0.0671164	-0.338817	-0.476951	-0.415283	-0.268374	-0.498512	0.391093	-0.00206685
58.8	0.319191	0.783603	-0.379432	-0.26866	0.203566	0.382743	-0.376213	-0.0625085	5.81335	-0.216484	-0.483056	-0.222804	-0.326624	-0.105996	0.0782268	0.461172	-0.106754	0.158576	-0.170888	-0.372518	-0.780313	0.697741	-0.0957831	-0.0438727	0.392541	-0.0357499	0.803492	-0.0324513	0.512289	0.438329	2.48173	-0.295135	-0.102387	0.152942	-0.399515	1.04068	-0.13949	-0.371311	-0.160228	-0.339577	0.114894	-0.348992	0.115002	-0.0617583
58.9	0.149502	0.707973	-0.251327	-0.25283	0.205067	0.316233	-0.481865	-0.437905	5.53769	-0.24601	-0.275699	0.104108	-0.369903	0.0762623	-0.0742627	0.736916	-0.15846	0.0650595	-0.403441	-0.731186	-0.676478	0.396568	0.0025237	-0.00640278	0.270438	0.00533155	0.956332	0.0798815	0.548306	0.104122	2.24382	-0.42583	-0.44931	0.213699	-0.427914	0.797144	-0.322232	-0.365013	-0.754213	-0.429733	-0.103693	-0.47512	0.176642	0.208611
59	0.183978	0.692943	-0.145878	-0.212811	0.136377	0.263105	-0.950128	-0.324857	6.22576	-0.354099	-0.310682	0.189988	-0.327147	0.116717	-0.24015	0.394535	-0.175992	0.259943	-0.147344	-0.83483	-0.669813	0.589068	0.111359	-0.206266	0.159871	-0.378371	1.1274	0.096975	0.162766	0.226519	2.73012	-0.240755	-0.302065	0.0868942	-0.427514	0.788319	-0.196714	-0.350005	-0.578724	-0.42018	-0.280242	-0.503882	-0.0387687	0.0159524
59.1	0.229316	0.564114	-0.275435	-0.202225	0.223905	0.129628	-0.780325	-0.432027	6.17863	-0.434721	-0.343255	0.329989	-0.343587	-0.0547327	0.167039	0.42262	-0.256059	0.323618	-0.170821	-0.971923	-0.642725	0.670653	-0.282388	-0.130089	0.138058	-0.271811	2.42053	0.322493	0.744594	0.351884	1.76546	-0.41556	-0.165079	0.232099	-0.351458	0.736129	-0.10373	-0.479787	-0.297334	-0.381884	0.103273	-0.294459	0.0796675	0.20386
59.2	0.278775	0.655904	-0.275556	-0.209425	0.0171591	0.48079	-0.239034	-0.182054	5.64954	-0.234356	-0.247402	0.0705177	-0.265261	-0.0706082	-0.0973636	0.243169	-0.0589296	-0.349019	-0.206517	-0.865317	-0.727256	0.665549	-0.183485	-0.206383	0.287765	-0.441143	2.66494	0.191582	-0.0543497	0.229751	2.05874	-0.429844	-0.0389534	0.172484	-0.259063	0.784905	-0.277057	-0.388807	-0.259182	-0.475429	-0.387132	-0.518764	0.159342	-0.141221
59.3	0.203545	0.536158	-0.494565	-0.28346	-0.034252	0.353673	-0.675938	-0.168575	5.50665	-0.345965	-0.534894	0.357495	-0.314768	-0.0780758	0.119106	0.623841	-0.211349	0.568886	-0.191649	-1.25009	-0.776913	0.351073	-0.158174	-0.261455	0.20558	-0.012234	2.66953	-0.243698	0.16524	0.0660614	2.25066	-0.402578	-0.373274	0.261297	-0.427754	0.545224	-0.218256	-0.397322	-0.356579	-0.422682	-0.500104	-0.398968	0.129394	0.185143
59.4	0.209048	0.546845	-0.318519	-0.228844	-0.0855341	0.379497	-0.0235817	-0.148831	5.44997	-0.352066	-0.383549	0.233752	-0.287466	-0.0462622	0.233284	0.603152	-0.262106	0.489627	-0.208477	-0.768371	-0.58614	0.225491	-0.144582	-0.167681	0.100547	-0.0191364	2.48365	0.469602	0.551826	0.155772	1.99606	-0.15689	-0.151609	0.0582986	-0.296444	0.707671	-0.296563	-0.554483	-0.538207	-0.352606	0.0063526	-0.455916	0.0827053	0.0608321
59.5	0.427189	0.387688	-0.26776	-0.32988	0.0429874	0.236454	-0.5356	-0.0526376	5.0175	-0.17172	-0.204957	0.0780393	-0.308798	0.110112	-0.0291065	0.405885	-0.0566881	0.340348	-0.118956	-0.869419	-0.619234	-0.0114379	-0.154912	-0.17729	0.166471	-0.134652	2.41877	0.0208576	0.395098	0.430561	1.80959	0.017421	-0.363127	0.180717	-0.23513	0.629839	-0.285549	-0.560739	-0.645527	-0.392159	-0.28264	-0.492303	0.440715	0.190164
59.6	0.490034	0.399867	-0.238262	-0.258061	-0.12136	0.452903	0.219688	0.014243	4.90041	-0.236444	-0.19376	0.0359544	-0.273899	0.242487	0.128488	0.768485	-0.163906	-0.251969	-0.167434	-1.09759	-0.593563	0.151894	-0.165883	-0.0930555	0.265309	-0.124933	4.26384	0.242264	0.425279	0.28	1.66759	-0.271668	-0.111442	0.192582	-0.307402	0.683556	-0.225912	-0.469455	-0.38512	-0.402577	-0.32061	-0.32802	0.618437	-0.0479118
59.7	0.320224	0.400793	-0.219613	-0.373985	0.0928801	0.475454	0.0529989	-0.244121	4.1576	-0.223125	-0.46991	-0.0813732	-0.322892	0.113544	0.136365	0.891349	-0.19812	0.319961	-0.108632	-1.34609	-0.736182	-0.202124	-0.361203	-0.191324	0.396796	-0.389185	6.60541	-0.368798	0.175266	0.154486	1.45289	-0.223885	-0.396023	0.191247	-0.231032	0.936729	-0.205341	-0.587311	-0.166054	-0.366612	-0.54658	-0.401473	0.877161	0.113172
59.8	0.324256	0.196612	-0.206803	-0.29268	0.166052	0.177484	0.308074	-0.335267	4.20726	-0.253443	-0.455892	0.0964765	-0.345613	0.118254	0.0680491	0.707204	-0.268646	0.581807	-0.107006	-1.19456	-0.719252	0.16445	-0.379021	-0.0747082	0.161686	-0.74376	7.62014	0.239239	0.149592	0.048635	1.64792	-0.498663	-0.254527	0.311555	-0.282433	0.727198	-0.290583	-0.569052	-0.476238	-0.450683	-0.766715	-0.433079	0.86653	0.167179
59.9	0.357717	0.219676	-0.345654	-0.353167	0.175837	0.631014	-0.150797	0.23617	3.67904	-0.258089	-0.31075	0.110113	-0.326837	0.179654	0.596016	0.740496	-0.196104	0.690545	-0.275861	-1.23946	-0.713556	-0.0804568	-0.167336	-0.337764	0.0634323	-0.11374	7.71603	0.0419993	0.438725	0.043326	1.62314	-0.34539	-0.398215	0.0823645	-0.464986	0.736581	-0.433008	-0.570697	-0.413853	-0.461017	-0.68197	-0.449852	0.445262	0.0405235
60	0.274911	0.151485	-0.240651	-0.399667	0.0971872	0.942695	-0.0742624	-0.401027	3.75856	-0.33677	-0.290956	0.41018	-0.329382	0.0519038	0.355496	0.567345	-0.268786	0.0189049	-0.151938	-1.26417	-0.650424	0.0574268	-0.247601	-0.235348	0.177866	-0.529977	7.44604	-0.194132	0.323766	0.104538	0.954595	-0.416545	-0.288909	0.27769	-0.348066	0.541672	-0.296592	-0.588105	-0.504934	-0.388498	-0.770107	-0.411529	0.775988	0.137292
60.1	0.398969	0.171521	-0.207194	-0.351591	-0.14741	0.624268	-0.0130299	-0.619501	3.29476	-0.290165	-0.187407	-0.0888952	-0.358447	0.0309369	0.10195	0.48328	-0.250816	0.396225	-0.0702167	-1.22179	-0.670849	0.148911	-0.0487935	-0.252515	0.0608081	-0.511358	7.13002	-0.0406352	0.118492	0.381392	0.98662	-0.0887975	-0.120222	0.43647	-0.369661	0.630591	-0.397119	-0.461371	-0.604401	-0.316011	-0.451147	-0.548362	0.485835	0.0633262
60.2	0.406797	0.1677	-0.221464	-0.29939	0.0130872	0.555861	0.308584	0.00235432	3.00495	-0.324899	-0.337986	-0.0538793	-0.327696	-0.0704299	-0.338017	0.659323	-0.276263	0.51951	-0.121791	-1.21504	-0.673807	0.18966	-0.167164	-0.409479	0.0913541	-0.292495	6.99685	-0.138938	0.176536	0.0787565	1.10806	-0.319789	-0.36738	-0.100941	-0.282403	0.691255	-0.560947	-0.620024	-0.16676	-0.389876	-0.389836	-0.498017	0.628265	-0.0301733
60.3	0.259615	0.108599	-0.265901	-0.259045	0.029308	0.690632	0.0350129	-0.0965793	2.98457	-0.186678	-0.187006	0.362922	-0.360677	0.00424761	0.0643519	0.636525	-0.296728	-0.177221	-0.35389	-1.1936	-0.740481	0.115166	-0.335239	-0.177571	-0.00724081	-0.314646	6.95354	-0.148895	-0.283199	0.153123	1.34146	-0.232583	-0.33367	0.0916517	-0.401982	0.484703	-0.502022	-0.656743	-0.603938	-0.428706	-0.425826	-0.735248	0.82793	0.145081
60.4	0.234525	0.0631428	-0.287598	-0.24942	0.0676843	0.52015	0.202178	-0.439516	3.10798	-0.255568	-0.465842	0.202848	-0.359441	0.104493	0.171577	0.31958	-0.353894	0.24033	-0.235056	-1.08334	-0.711242	-0.147036	-0.255244	-0.449574	0.178708	-0.238229	6.55206	-0.0150037	0.285154	0.37514	1.9776	-0.368525	-0.201412	0.132829	-0.365528	0.782044	-0.498642	-0.6531	-0.55567	-0.34691	-0.54259	-0.749773	0.906779	0.13533
60.5	0.320939	0.0538649	-0.350925	-0.244762	0.122732	0.576888	0.0382903	-0.352574	2.85097	-0.290709	-0.252949	0.16112	-0.305208	0.155614	0.347397	0.594556	-0.360492	0.452211	-0.180557	-0.962685	-0.75185	0.110676	-0.179329	-0.44452	0.212167	0.0387965	6.29799	-0.131742	0.0247944	0.0992565	1.48021	-0.315463	-0.189069	0.365367	-0.385622	0.395687	-0.316727	-0.488637	-0.546559	-0.396075	-0.695616	-0.807217	0.850443	0.278891
60.6	0.180795	0.135894	-0.180852	-0.236822	0.128073	0.528013	0.0942749	0.160118	2.63346	-0.263108	-0.495931	0.194322	-0.32483	-0.0333422	0.0647223	0.534608	-0.173734	0.261149	-0.30881	-1.13298	-0.734874	-0.27019	-0.309934	-0.161813	-0.0417504	-0.019184	5.95359	0.21451	-0.115942	-0.0619715	1.66049	-0.264954	-0.351222	-0.0441909	-0.302138	0.864017	-0.278173	-0.502165	-0.484515	-0.410026	-0.922408	-0.878549	1.30783	0.173218
60.7	0.188771	0.0525252	-0.333631	-0.187718	-0.0232839	0.690632	0.472979	-0.137852	2.43664	-0.258004	-0.270377	-0.0240513	-0.331314	0.0881284	0.618738	0.837147	-0.383412	0.256488	-0.347353	-1.27954	-0.685174	-0.0354728	-0.184632	-0.141867	0.0564556	-0.27305	6.08967	-0.118616	0.439311	-0.0955679	1.31057	-0.465348	-0.0460085	0.175784	-0.36397	0.612629	-0.254628	-0.615939	-0.405703	-0.390007	-0.795606	-0.800261	0.867891	0.0948188
60.8	0.218121	-0.0291427	-0.275929	-0.298145	0.301448	0.527619	0.366115	0.192995	2.52319	-0.359468	-0.240124	0.35274	-0.295694	0.0249356	0.606719	1.01918	-0.155145	0.328704	-0.331003	-1.01303	-0.711908	0.105487	-0.304426	-0.251844	0.239324	-0.0396534	5.89068	0.105084	0.233703	0.346212	1.66915	-0.273843	-0.166841	-0.0117057	-0.314288	0.540504	-0.0719806	-0.745613	-0.402023	-0.403588	0.0941465	-0.703191	0.985067	0.167663
60.9	0.290028	0.0725724	-0.224688	-0.257633	0.161865	0.810249	0.482717	-0.198922	2.28355	-0.481167	-0.134388	0.228884	-0.310231	0.0102997	1.35485	0.933716	-0.193663	-0.135232	-0.225003	-0.977833	-0.54863	-0.134952	-0.190153	-0.34001	-0.045038	-0.0514542	6.15945	-0.2053	0.58354	0.362858	1.59806	-0.237727	-0.0731716	-0.237035	-0.232627	0.69031	-0.177909	-0.512716	-0.0546294	-0.414176	0.0602418	-0.732226	1.01024	0.00932089
61	0.292981	0.0456803	-0.24366	-0.251273	-0.0694864	0.567912	0.640475	-0.179741	2.26858	-0.399919	-0.0159266	0.0663609	-0.278898	0.107237	1.11195	0.802639	-0.292725	0.703379	-0.176765	-1.11846	-0.535099	-0.33683	-0.049507	-0.267992	0.064994	0.379839	6.48528	-0.265359	0.515844	0.187497	1.37991	-0.103524	-0.0538359	0.0820611	-0.0956081	0.592006	-0.13302	-0.693213	-0.201144	-0.39172	-0.602733	-0.595354	0.796996	0.389457
61.1	0.290908	-0.0388005	-0.168636	-0.281896	0.0237836	0.738762	0.617918	-0.198675	1.93835	-0.323389	0.153069	-0.192185	-0.342995	-0.0525441	0.842682	0.970987	-0.196699	0.13662	-0.058318	-1.36417	-0.525016	-0.26227	-0.193415	-0.397485	0.0290063	0.685354	7.06474	-0.443315	0.440472	0.281115	1.20274	-0.290631	-0.131833	0.0205446	-0.142154	0.634681	-0.23836	-0.604076	0.226238	-0.371317	-0.286244	-0.603519	1.16961	0.384619
61.2	0.201306	0.0567215	-0.38834	-0.375116	0.0416324	0.68461	0.30139	-0.19819	2.10868	-0.304208	0.035322	0.320192	-0.275407	-0.0478653	1.10091	0.81958	0.0418424	-0.316712	-0.19385	-1.62378	-0.390462	-0.16121	-0.450839	-0.323436	-0.102658	0.0929793	8.6288	0.046148	0.48106	0.230284	1.88066	-0.183007	-0.185714	0.00181956	-0.0070181	0.572106	-0.422826	-0.69578	0.196591	-0.267033	-0.251325	-0.48999	1.32643	0.431953
61.3	0.240398	-0.0580408	-0.135162	-0.249913	0.183427	0.568856	0.183861	-0.000589476	1.54374	-0.323184	-0.0648231	-0.0596046	-0.257779	-0.101872	0.709444	0.851997	-0.3518	0.0117341	-0.261612	-1.55662	-0.349675	-0.133391	0.00576443	-0.218722	0.0265601	-0.353799	9.58124	-0.139917	0.841483	0.0691631	1.30565	-0.347208	-0.00981011	-0.177355	0.114014	0.747329	-0.201176	-0.700969	0.511427	-0.240844	0.00575969	-0.464112	0.877721	0.600867
61.4	0.245128	0.0803038	-0.265433	-0.317776	0.00772556	0.784664	0.703116	-0.475276	1.54273	-0.248549	-0.1473	-0.0178793	-0.277663	-0.0307081	0.76277	1.09148	-0.240648	0.337355	-0.194602	-1.98395	-0.412314	-0.244069	-0.613569	-0.293151	0.0685958	-0.0829879	10.2019	-0.347319	0.549599	0.256226	1.67196	-0.212699	0.0627511	-0.0181557	0.135162	0.821726	-0.297316	-0.804144	0.317851	-0.289227	-0.557518	-0.262955	0.907862	0.57321
61.5	0.311387	-0.0861013	-0.295825	-0.377074	-0.0610547	0.726849	0.619501	-0.18382	1.52511	-0.378844	-0.181173	-0.0658197	-0.305444	-0.136827	0.491863	0.611412	-0.186827	0.358466	-0.201337	-1.4008	-0.382361	-0.0482328	-0.176663	-0.239766	0.0355385	0.108414	10.1228	-0.13891	0.166026	0.163026	2.24955	-0.276818	-0.00514568	-0.151384	0.196851	0.590931	0.134054	-0.757666	0.160823	-0.261463	-0.582729	-0.290356	1.25177	0.680704
61.6	0.222055	0.0121982	-0.388102	-0.339223	0.153878	0.527741	0.178283	-0.0582623	1.29029	-0.262579	-0.0423815	-0.303063	-0.332296	-0.0367887	0.0200735	1.1364	-0.219076	0.36958	-0.208248	-1.57081	-0.304013	-0.235094	-0.477257	-0.100451	0.0811893	-0.0931497	9.89889	-0.261716	0.280305	0.164331	2.1857	-0.166465	-0.217734	0.063592	0.127287	0.785173	-0.0573577	-0.631066	-0.0813428	-0.243174	-0.533487	-0.233191	1.52277	0.695934
61.7	0.443183	-0.101193	-0.286629	-0.234995	0.03316	0.679871	0.49038	-0.0230671	1.42336	-0.430912	-0.356756	0.213489	-0.340195	0.0594478	0.293811	0.595165	-0.22931	0.548313	-0.153072	-1.5163	-0.43001	-0.0933734	-0.489701	-0.241505	-0.182104	-0.256823	9.45411	-0.613575	0.30885	0.219887	2.27626	-0.262412	-0.0488933	0.0439695	0.0608689	1.17601	-0.29783	-0.647103	0.0132279	-0.242516	-0.500499	-0.475767	0.927073	0.319364
61.8	0.214645	0.0103585	-0.0738602	-0.23878	-0.131882	0.702756	-0.231773	-0.091919	1.34649	-0.349787	-0.0971612	-0.253625	-0.321491	-0.0687108	0.18373	0.580438	-0.252318	0.308429	-0.31716	-1.38866	-0.438127	0.0618014	-0.366003	-0.234365	-0.0129875	-0.182758	9.13163	-0.337003	-0.150572	0.00744373	2.71765	-0.161816	-0.123322	-0.0524203	-0.0611781	1.38148	-0.298747	-0.58442	0.0569486	-0.302179	-0.921545	-0.674395	1.10661	0.558864
61.9	0.348077	-0.100373	-0.280502	-0.245708	0.069122	0.549843	-0.052919	-0.16478	1.28914	-0.257747	-0.0499472	0.365796	-0.278964	-0.0641597	0.0852137	0.774015	-0.250542	0.253725	-0.312106	-1.35169	-0.543154	0.0980595	-0.449239	-0.243843	0.206123	-0.217603	8.7365	-0.0344404	0.355515	-0.0188358	2.96304	-0.276327	-0.302701	-0.0387402	0.0355981	1.48731	-0.235648	-0.754523	-0.43015	-0.382236	-0.663409	-0.337961	1.09353	0.14398
62	0.269046	-0.128258	-0.320494	-0.218321	0.145095	0.42847	0.235907	-0.234057	1.19808	-0.0416098	-0.11769	0.653228	-0.31604	-0.143979	0.3198	0.720593	-0.362687	0.769	-0.32438	-1.40477	-0.603042	0.204312	-0.279934	-0.249424	0.167249	-0.0979705	8.46751	-0.555019	0.475338	0.251339	3.18425	-0.184253	-0.337219	0.0450791	-0.145648	1.60624	-0.412375	-0.715698	0.0444079	-0.254811	-0.857792	-0.449364	1.02649	0.171642
62.1	0.243783	-0.108024	-0.305733	-0.298928	-0.0341124	0.818823	0.316722	-0.0503613	0.960887	-0.0794175	-0.223801	0.260087	-0.253184	-0.0704858	0.701514	0.718203	-0.360497	0.481544	-0.307665	-1.06209	-0.563731	-0.0909744	-0.510457	-0.355829	0.167807	0.114055	8.13876	-0.604664	0.398892	0.127732	3.52303	0.0989601	-0.445046	-0.0675588	-0.115879	1.16518	-0.562196	-0.697901	-0.187557	-0.134285	-0.490002	-0.672149	1.33188	0.409519
62.2	0.377401	-0.141554	-0.18278	-0.359253	0.0152627	1.01223	-0.0816223	-0.492154	0.86072	-0.166313	-0.368286	0.257656	-0.2296	-0.186446	0.690886	0.925878	-0.138148	0.361098	-0.267803	-1.33186	-0.550441	-0.0535791	-0.269522	0.324102	-0.0141368	0.0705544	7.86038	-0.256832	0.197296	0.202855	3.25618	-0.109071	-0.459815	-0.204006	-0.0489729	1.39961	-0.653536	-0.824996	0.0468988	-0.232269	-0.500408	-0.530635	0.671739	0.230446
62.3	0.387842	-0.127523	-0.166953	-0.242686	0.415179	1.03199	-0.345179	-0.120697	0.90935	-0.107423	0.0366648	0.24543	-0.288947	-0.17136	1.12148	0.519245	-0.175094	0.531017	-0.301844	-1.25498	-0.596286	-0.0243677	-0.561418	0.624217	-0.0518113	0.168209	7.56311	-0.466068	0.181227	0.240835	3.63986	-0.0878116	-0.245796	0.0105112	-0.163701	1.34821	-0.349891	-0.707269	-0.50211	-0.346813	-0.699684	-0.670519	1.21774	0.252523
62.4	0.343334	-0.155912	-0.135996	-0.278065	0.223532	0.622337	-0.154875	-0.514916	0.871659	-0.159411	-0.431319	0.164579	-0.231842	-0.125097	0.90178	0.539933	-0.256887	0.521755	-0.271845	-1.06746	-0.632056	0.071457	-0.333592	1.11866	-0.18747	-0.00675963	7.1104	-0.467932	-0.0466826	0.395705	3.89433	0.00397238	-0.230748	-0.37228	-0.103993	1.74982	-0.527753	-0.692211	-0.582013	-0.333475	-0.521848	-0.574568	1.12344	0.538475
62.5	0.451343	-0.171246	-0.197516	-0.263034	0.368088	0.731477	0.0500412	-0.435502	0.770386	-0.273231	-0.360354	0.455325	-0.238235	-0.121594	0.816803	1.07853	-0.209619	0.288016	0.010011	-1.11249	-0.593888	0.116127	-0.0932823	1.22282	-0.263224	-0.564232	7.046	-0.016254	0.0607802	0.0392802	3.43301	7.75683e-06	-0.381829	0.0874477	-0.118994	1.22935	-0.332085	-0.775153	-0.534751	-0.409376	-0.696229	-0.639058	0.899051	0.518937
62.6	0.367001	-0.129101	-0.197632	-0.264817	0.239448	0.552992	0.234879	0.0922086	0.853994	-0.276587	-0.219386	0.498393	-0.246534	-0.0804921	0.925997	1.04524	-0.189396	0.726063	-0.352735	-0.986396	-0.508807	0.0716221	-0.167635	1.27577	-0.0255059	-0.399351	6.75994	-0.160062	0.193113	0.0129456	3.75684	0.0738178	-0.170644	0.166982	-0.148586	1.23754	-0.357684	-0.863475	-0.268862	-0.435636	-0.806493	-0.616715	0.88365	0.52867
62.7	0.224805	-0.0797773	-0.258028	-0.353297	0.232719	0.571913	0.106449	-0.245017	0.891866	-0.268767	-0.264469	0.453024	-0.266026	-0.00803678	1.04857	0.70557	-0.295042	0.0804621	-0.38645	-1.06696	-0.521502	-0.103022	-0.411622	1.25002	-0.439965	-0.310493	6.20627	-0.209549	0.170398	0.213465	3.46689	-0.0173732	-0.450731	0.0783089	-0.268312	1.53284	-0.311939	-0.835006	-0.480861	-0.265433	-0.659589	-0.578881	1.03701	0.61779
62.8	0.347245	-0.0928925	-0.152132	-0.15582	0.224445	0.262029	-0.194415	-0.48549	0.809621	-0.314154	-0.196553	0.257979	-0.246288	0.050299	0.453241	0.834589	-0.146129	0.426762	-0.210791	-1.08399	-0.637613	0.0384094	-0.291139	1.21082	-0.246882	-0.0163755	6.11322	-0.587026	0.238361	0.174495	3.05412	0.0815108	-0.565314	0.295501	-0.121122	1.71872	-0.384243	-0.775736	-0.803023	-0.299173	-0.721376	-0.766108	0.663778	0.686198
62.9	0.278795	-0.170443	-0.243393	-0.21091	0.215047	0.401835	-0.0041248	-0.542297	1.03872	-0.239211	-0.148214	0.134171	-0.199746	-0.205165	0.639424	1.09559	-0.187693	0.802717	-0.185277	-0.777467	-0.689892	0.0912816	-0.283915	1.16994	-0.0714994	-0.0309896	6.04891	-0.118529	0.195161	-0.0965236	3.33791	0.0595929	-0.247524	0.194974	-0.204391	1.58249	-0.279809	-0.849264	-0.675354	-0.239206	-0.464262	-0.715266	1.00604	0.575081
63	0.381395	-0.157204	-0.103819	-0.187624	0.291036	0.426148	0.0263796	-0.374762	0.90586	-0.202504	-0.158999	0.36383	-0.281406	-0.119644	0.46236	1.22599	-0.0991768	0.651211	-0.171036	-0.660905	-0.660246	-0.0747283	-0.664029	1.13484	-0.185207	0.030466	5.75741	-0.774693	0.106948	0.0678359	3.66067	-0.16189	-0.0856873	0.35492	-0.248413	1.31826	-0.166684	-0.696166	-0.266422	-0.307139	-0.513932	-0.581975	0.88619	0.660526
63.1	0.35683	-0.177278	-0.125881	-0.189209	0.16038	0.507698	0.185196	-0.381563	1.10378	-0.324962	0.266644	0.252019	-0.21164	-0.237964	0.523969	0.602766	-0.15823	0.488537	-0.0777135	-0.700244	-0.529935	0.101773	-0.205956	1.16995	-0.0787826	-0.333511	5.7142	-0.278617	0.166597	0.148106	3.16102	-0.00328798	-0.180492	0.484707	-0.176684	1.62356	-0.0818382	-0.770188	-0.111461	-0.37922	-0.219593	-0.402993	0.428103	0.708091
63.2	0.177254	-0.0958356	-0.183968	-0.296688	0.358973	0.489542	0.281049	-0.624899	1.07059	-0.355688	-0.164359	0.50162	-0.197179	-0.195097	0.193332	1.13396	-0.0937873	0.421984	-0.291083	-0.653323	-0.578751	0.0313962	-0.497912	1.79804	-0.135901	-0.638253	5.68824	-0.509721	0.107397	0.0267003	2.94038	-0.0128743	-0.108473	0.236649	-0.0660643	1.43773	-0.413295	-0.717494	-0.16712	-0.328548	-0.554456	-0.432541	0.762427	0.857066
63.3	0.200863	-0.14077	-0.211628	-0.253249	0.401533	0.576896	-0.325484	-0.279209	1.15692	-0.287505	-0.333263	0.597521	-0.191873	-0.167085	0.495204	0.701836	-0.0948351	0.0768919	-0.329027	-0.793974	-0.470275	-0.159961	-0.0181017	1.68999	-0.189334	-0.171333	5.4239	-0.121269	0.415258	0.115765	2.98936	0.126237	-0.250274	0.247409	-0.0974374	1.50707	-0.481848	-0.805565	-0.498862	-0.365861	-0.555866	-0.488897	0.843822	0.533693
63.4	0.510457	0.0603503	-0.283352	-0.217613	0.415637	0.589086	-0.0384502	-0.533667	1.24425	-0.274272	0.0326738	0.659128	-0.184064	-0.151719	0.135918	0.833875	-0.166914	0.728647	-0.131005	-0.64252	-0.458406	-0.118365	-0.231607	1.56383	-0.346963	-0.429785	4.99573	0.0850249	0.177205	0.0816825	3.08999	-0.179586	-0.134831	0.284158	-0.0522847	1.22674	-0.215891	-0.667394	-0.126589	-0.243558	-0.224593	-0.543966	0.749168	0.432715
63.5	0.431797	-0.00451963	-0.0861795	-0.257008	0.568035	0.440486	-0.111386	-0.0834881	1.13586	-0.343731	0.00809387	0.390818	-0.242591	-0.0870766	0.214995	0.598629	-0.226383	0.696743	-0.311974	-0.60257	-0.468009	-0.061698	-0.140478	1.31438	-0.0675423	-0.153263	4.90241	-0.362439	0.244447	0.245041	2.54152	-0.00856694	-0.29293	0.206026	-0.135315	1.44812	-0.445285	-0.738868	-0.246146	-0.362191	-0.250902	-0.328598	0.859969	0.302717
63.6	0.443613	-0.0858013	-0.318637	-0.217629	0.2729	0.546746	-0.214679	-0.277494	1.00351	-0.419795	-0.307123	0.593646	-0.231502	-0.173805	0.209377	1.0544	-0.264897	0.47826	-0.290247	-0.737499	-0.569922	0.332941	-0.0373947	1.21612	-0.135596	0.435469	4.6552	-0.311806	-0.0430964	0.158948	3.18817	-0.11866	-0.284226	0.277452	-0.207704	1.22761	-0.273296	-0.685554	-0.248566	-0.385631	-0.333957	-0.445909	0.460723	0.696458
63.7	0.536873	-0.0897139	-0.0824742	-0.264042	0.262739	0.181551	-0.299097	-0.317012	1.08814	-0.365193	-0.161364	0.390965	-0.218497	-0.107357	0.448155	0.820503	-0.239032	0.88395	-0.339494	-1.0188	-0.562948	0.322684	-0.29717	1.14238	-0.103072	-0.115759	5.71955	0.100609	0.661597	-0.179518	2.78005	-0.0765655	-0.388945	0.443062	-0.16686	1.3523	-0.247983	-0.748151	-0.076275	-0.404015	-0.385846	-0.144928	0.794939	0.884589
63.8	0.796137	-0.0926975	-0.0819533	-0.199712	0.172543	0.184189	-0.135971	-0.443209	1.00536	-0.460643	0.0114508	-0.00529031	-0.183836	-0.147571	0.0351742	1.05938	-0.294216	0.678946	-0.380097	-1.00315	-0.698061	0.198867	-0.219052	1.12101	-0.302105	-0.687481	6.5923	-0.482112	0.514488	0.0821388	2.99033	-0.1013	-0.37423	0.499153	-0.247553	1.58828	-0.179744	-0.738806	-0.233926	-0.278392	-0.14604	-0.398582	1.02617	0.870283
63.9	0.759553	-0.0958389	-0.126352	-0.201726	0.178492	0.518886	-0.425796	-0.115037	1.21061	-0.284325	-0.0522202	0.348463	-0.18244	-0.116185	0.138632	0.887473	-0.188721	0.860724	-0.439914	-1.00821	-0.541125	0.489496	-0.532802	1.44215	-0.204516	-0.321205	6.47528	-0.217385	0.00527423	0.0732161	3.04064	-0.120908	-0.100197	0.443112	-0.201572	1.28196	-0.318187	-0.783702	0.141299	-0.295289	-0.133448	-0.173457	0.827523	0.811079
64	0.685875	-0.0680106	-0.0901989	-0.264205	0.200438	0.571927	-0.0373311	-0.247899	1.06191	-0.277779	-0.108989	0.236606	-0.203464	-0.168377	0.243806	1.04566	-0.264205	1.02674	-0.294674	-0.70138	-0.642188	0.297769	-0.345278	1.36052	-0.197441	-0.561516	6.5208	-0.0056832	0.194624	-0.347339	3.0988	-0.165634	0.00734834	0.263596	-0.137801	1.47283	-0.160766	-0.732458	-0.337137	-0.292039	-0.128543	-0.385928	0.740967	0.859661
64.1	0.597131	-0.12692	-0.0799088	-0.40743	0.19976	0.957165	-0.540247	-0.0348203	1.3974	-0.230684	-0.0246918	0.299468	-0.162477	-0.219917	-0.0203928	0.602263	-0.25202	0.651067	-0.361473	-0.783957	-0.546988	0.306199	-0.0541217	1.46046	-0.294255	-0.498983	6.25077	-0.250267	-0.0824854	-0.108679	2.8786	-0.0525665	-0.0893243	0.50861	-0.299627	1.27399	-0.188129	-0.833535	-0.118018	-0.25435	-0.328381	-0.454983	0.878295	0.922383
64.2	0.728743	-0.160221	0.175896	-0.236496	0.407791	0.81452	-0.103621	-0.348148	1.03912	-0.319283	-0.0606266	0.225688	-0.253716	-0.194171	0.210689	0.832066	-0.0684502	0.594819	-0.428317	-0.845325	-0.523105	0.0687798	0.0718062	1.32095	-0.363852	0.0400342	6.03105	-0.350562	0.0499597	-0.22039	2.74097	0.078309	-0.18402	0.45363	-0.219438	1.35985	-0.154772	-0.630489	0.125941	-0.292853	-0.0142298	-0.326068	0.817774	0.776338
64.3	0.907587	-0.19635	-0.0990008	-0.344891	0.491976	1.06289	-0.550518	-0.103995	1.20395	-0.223165	-0.2023	0.363994	-0.178841	-0.357593	0.465345	0.835049	-0.181516	0.455641	-0.445324	-0.787268	-0.479823	0.310608	-0.206882	1.17761	-0.387774	-0.308135	5.5735	-0.380485	-0.14681	-0.293899	2.40275	-0.0098113	-0.0540663	0.589317	-0.226792	1.283	-0.419654	-0.687606	-0.0963925	-0.315515	0.00703021	-0.532361	1.01522	0.654784
64.4	0.898894	-0.0104573	0.0417811	-0.275651	0.353354	1.10658	-0.406545	-0.352439	1.14972	-0.208951	0.252936	0.203071	-0.246649	-0.143807	-0.0266886	0.776599	-0.113241	0.982899	-0.579708	-0.667012	-0.539994	0.50627	-0.193274	1.14612	-0.0718668	0.0960035	6.20553	-0.321271	0.0443331	0.122628	3.09151	0.141843	-0.176091	0.411082	-0.319905	1.25078	-0.394323	-0.587654	-0.185325	-0.361407	0.274201	-0.49062	0.769771	0.905941
64.5	1.17349	-0.184482	0.0809053	-0.323851	0.147844	0.966441	-0.768341	-0.212053	1.3411	-0.462425	-0.455989	0.423577	-0.216319	-0.172108	0.226626	1.10606	-0.118445	0.789973	-0.547503	-1.04738	-0.474981	0.633516	-0.457031	0.831058	-0.100434	-0.306062	6.8373	-0.138858	-0.0766442	0.238798	3.39216	-0.285762	0.0275379	0.22679	-0.228549	1.67207	-0.353498	-0.734867	-0.225972	-0.310114	0.0243093	-0.187412	1.66776	0.832864
64.6	1.28384	-0.145183	-0.0980831	-0.307616	-0.0527899	0.577631	-0.78076	-0.671703	0.821186	-0.366178	0.0767588	0.469964	-0.231903	-0.248396	0.40667	0.86951	-0.0986032	0.70534	-0.481709	-0.687867	-0.649379	0.64451	-0.233569	0.668005	-0.0127576	0.037178	6.82968	-0.431174	0.0799949	-0.309617	3.70305	-0.0159374	0.0283707	0.291732	-0.379755	1.40969	-0.269978	-0.77702	-0.154459	-0.258951	-0.228986	-0.31151	1.50249	0.806742
64.7	1.50894	-0.19821	-0.124191	-0.31815	0.303713	0.636026	-0.801289	-0.238918	1.39332	-0.462294	0.0353593	0.337206	-0.251378	-0.115693	0.303663	0.924779	-0.226815	0.744701	-0.393076	-0.994032	-0.571219	0.360852	-0.331989	0.511303	0.0647556	-0.244925	6.48689	-0.364428	-0.133449	-0.290102	3.32325	-0.0635351	-0.0388605	0.603512	-0.263309	1.80461	-0.320952	-0.693749	0.241524	-0.364675	0.149921	-0.577132	1.54668	0.554285
64.8	1.51063	-0.124772	-0.260834	-0.248722	0.0973064	1.04045	-0.512434	-0.023543	1.26557	-0.385811	0.23899	0.304187	-0.226286	-0.210021	0.204853	0.556474	-0.218517	0.926596	-0.644445	-1.00459	-0.725821	1.11509	-0.192943	0.334457	-0.226699	-0.0819344	6.25268	0.434322	-0.0921236	-0.292444	2.56849	-0.0901855	-0.00894016	0.50907	-0.286976	2.07476	-0.529725	-0.76478	0.2389	-0.319301	-0.0781964	-0.434948	1.72967	0.722386
64.9	1.86205	-0.0966606	-0.202802	-0.222232	0.163954	0.738809	-0.625949	-0.231092	1.35658	-0.378794	0.179891	0.433798	-0.282992	-0.160195	1.16773	0.549665	-0.205812	1.11789	-0.306667	-0.858098	-0.65996	1.43292	-0.135208	0.399392	0.0591163	-0.14351	6.09084	-0.0696663	-0.0154578	-0.0702826	3.04647	-0.330542	0.261932	0.639245	-0.433603	2.49278	-0.489238	-0.788236	0.32986	-0.400567	-0.223827	-0.44839	1.4348	0.44827
65	2.75391	-0.0780513	-0.273454	-0.187533	0.0550048	0.702349	-0.548719	-0.342437	1.61355	-0.403458	-0.151478	0.268802	-0.280638	-0.319849	1.75514	0.941149	-0.267097	1.27473	-0.406491	-0.855205	-0.501016	1.94021	0.00446392	0.118948	-0.100384	-0.111745	5.83121	0.212929	0.158121	-0.0613087	3.03431	-0.248142	0.0775423	0.317981	-0.328793	3.06119	-0.500889	-0.804863	0.450869	-0.358725	-0.0997262	-0.327361	1.28793	0.790445
65.1	3.47923	-0.123958	-0.128378	-0.18309	0.0111858	0.826266	-0.996082	-0.278116	2.04748	-0.295861	0.170501	0.312492	-0.309308	-0.22732	2.23942	0.39249	-0.285202	2.1847	-0.528401	-0.573873	-0.513107	3.05485	-0.219953	-0.139917	0.0849107	-0.183503	5.48942	0.395813	-0.159659	0.302791	3.33266	-0.113507	0.158968	0.326327	-0.291595	3.42065	-0.451962	-0.765284	0.482371	-0.38863	0.102025	-0.401477	1.59256	0.684262
65.2	4.47527	-0.30482	-0.0946879	-0.110776	-0.0280071	0.684963	-1.24093	-0.228284	2.06097	-0.19367	0.445331	0.304916	-0.358203	-0.201735	3.20316	0.630229	-0.137437	2.20039	-0.565781	-0.988523	-0.67515	4.18487	-0.09069	0.0556249	-0.239475	-0.412517	5.25249	0.607871	0.435763	0.317276	3.32297	-0.334421	0.0551779	0.525623	-0.407526	3.88481	-0.56875	-0.762022	0.360837	-0.419332	0.398164	-0.462495	1.38147	0.723777
65.3	5.04562	-0.268974	-0.0740753	0.0532553	0.0134298	1.16216	-1.47238	-0.518717	2.22507	-0.129413	0.0370378	-0.0235614	-0.324355	-0.183315	3.08148	0.422094	-0.189919	2.56004	-0.546141	-0.995094	-0.666227	4.58321	-0.0933237	-0.120166	-0.00825223	-0.134961	4.8747	0.499301	0.0482903	-0.193293	3.54024	-0.280856	0.179133	0.397213	-0.518269	3.8301	-0.440384	-0.72576	0.331339	-0.479148	-0.151347	-0.467508	0.723026	0.792884
65.4	5.16272	-0.27974	-0.229431	0.0656974	0.0736203	0.662179	-1.26198	-0.387387	2.03428	-0.414815	0.214842	-0.250148	-0.348002	-0.113094	2.27853	0.314647	-0.184783	2.62976	-0.468039	-0.482965	-0.644756	4.83726	-0.369472	-0.218036	0.138619	-0.451979	4.54369	0.345169	0.0828607	0.142753	3.60087	-0.33865	0.0263853	0.628794	-0.368674	3.81985	-0.556517	-0.773177	0.276122	-0.534607	0.329148	-0.516627	1.00443	0.844219
65.5	5.15807	-0.431453	-0.186235	-0.0239979	-0.0316844	1.08065	-1.24686	-0.296405	2.26176	-0.360753	0.0482744	0.118838	-0.325456	-0.279279	2.59757	0.386954	-0.0970437	1.94889	-0.49841	-0.696602	-0.713282	5.28097	-0.32188	-0.17472	0.0340676	-0.449286	4.32387	0.27824	-0.0478574	-0.242129	3.59748	-0.243609	0.101949	0.350453	-0.391673	3.96298	-0.394912	-0.686708	0.358405	-0.44482	0.51302	-0.600143	0.897112	0.84809
65.6	5.10868	-0.262706	-0.291487	0.0439039	0.0247853	1.00176	-1.11149	-0.298802	2.2214	-0.353982	0.107272	0.204641	-0.27886	-0.155968	2.04715	0.554882	-0.161902	1.893	-0.522265	-0.894511	-0.688902	5.58342	-0.202156	-0.302255	-0.243811	-0.2602	4.06152	0.294109	0.0283188	0.028545	3.38228	-0.0145973	0.336359	0.305928	-0.463218	3.73421	-0.435685	-0.867402	0.139753	-0.475645	-0.068202	-0.338822	0.91917	0.661531
65.7	4.91416	-0.277387	-0.124199	-0.00336078	0.196569	0.917422	-0.974757	-0.154814	2.41422	-0.318719	0.136513	0.406679	-0.378639	-0.306538	1.87773	0.37284	-0.203538	2.12378	-0.510395	-0.426359	-0.772674	5.63484	-0.00152898	-0.482472	-0.214712	-0.760561	3.97358	0.475466	-0.244099	-0.181693	3.40323	-0.160754	-0.0693764	0.430027	-0.562295	4.13392	-0.681866	-0.902661	0.498505	-0.606421	0.0655453	-0.36634	1.30628	0.748049
65.8	5.35048	-0.250416	-0.172619	0.113756	0.0699016	1.03132	-0.678707	-0.421729	2.63863	-0.264897	0.0103318	0.34092	-0.359156	-0.276104	1.95049	0.304046	-0.2787	1.97384	-0.627568	-0.649451	-0.698745	5.66707	-0.0647873	-0.291932	-0.220611	-0.352051	3.73634	0.470617	-0.049465	0.023917	3.20677	-0.275082	0.0682742	0.18765	-0.479515	3.6556	-0.720815	-0.842737	0.378662	-0.518167	0.0201166	-0.785775	0.813908	0.447641
65.9	5.25952	-0.244968	-0.111021	0.0192185	0.11469	0.951343	-1.03077	-0.516745	2.94301	-0.368528	-0.0526536	0.418753	-0.35256	-0.251311	1.41426	0.40614	-0.27119	1.95565	-0.568922	-0.890513	-0.527677	6.03242	-0.11191	-0.541971	-0.0908217	-0.154453	3.73975	0.743581	-0.323511	-0.0395701	3.24441	-0.120433	0.1032	0.282157	-0.565957	3.2218	-0.535317	-1.03022	0.212351	-0.554936	-0.0864069	-0.568974	1.06242	0.429443
66	5.37348	-0.321556	-0.155214	-0.00209094	-0.182924	0.771504	-0.891486	-0.349056	3.1854	-0.29337	0.136737	-0.27069	-0.401228	-0.111504	1.10454	0.160927	-0.404574	1.53682	-0.692594	-0.763639	-0.532189	5.74705	-0.161062	-0.59723	0.174893	-0.0300851	3.38351	0.589814	-0.353415	0.396184	3.68182	-0.452667	0.0586954	0.462554	-0.511456	3.24473	-0.697846	-0.774719	0.196672	-0.417618	0.0986683	-0.50169	0.626732	0.471972
66.1	5.31847	-0.389439	-0.203996	0.10853	0.0755961	0.727705	-0.761902	-0.193733	3.03483	-0.365363	0.218124	0.0810381	-0.365976	-0.102796	1.4416	0.0860634	-0.351375	1.92194	-0.649723	-0.980081	-0.585379	5.88361	-0.0657845	-0.511287	-0.142635	-0.334634	3.16909	0.143973	-0.242122	0.321985	2.81895	-0.222416	0.171658	0.325779	-0.5786	3.09688	-0.742333	-0.857243	-0.192765	-0.569793	0.179229	-0.67341	0.493446	0.605714
66.2	5.23419	-0.352453	-0.308395	0.0482666	-0.0466177	0.960791	-1.48217	0.105803	4.5098	-0.486572	-0.184698	-0.265302	-0.391036	-0.0785768	1.45202	0.247951	-0.373134	1.6765	-0.78128	-0.857842	-0.614939	6.29961	0.282064	-0.491339	0.0449343	-0.567297	2.89941	0.27945	-0.546778	0.0241435	3.30026	-0.221398	0.134134	0.315669	-0.548086	2.92431	-0.44454	-1.00209	0.0641638	-0.547525	0.228034	-0.586931	0.512223	0.636057
66.3	5.37856	-0.154476	-0.296018	0.0940366	0.107899	0.699724	-1.47578	-0.0705439	4.5678	-0.454704	0.0315548	0.324765	-0.406128	-0.0414542	1.74177	0.335797	-0.113204	1.68241	-0.590245	-0.642658	-0.617064	6.88768	0.149591	-0.419834	0.0685266	-0.134131	2.79947	0.172649	0.0549062	0.12196	3.54726	-0.114399	0.3798	0.370833	-0.634736	2.78539	-0.574035	-0.903268	0.293514	-0.504887	0.316901	-0.773127	0.553654	0.802267
66.4	5.55527	-0.273497	-0.395746	0.100997	-0.0330765	0.74737	-0.844454	-0.199859	5.1248	-0.342156	0.132799	0.303727	-0.348221	-0.170742	1.51732	0.341451	-0.200353	1.99591	-0.520152	-1.13199	-0.55888	6.61944	0.0896932	-0.681225	0.0395028	-0.174171	2.97621	0.00185279	-0.238569	0.235146	3.24814	-0.278529	0.140887	0.418426	-0.569766	2.90966	-0.749752	-0.834323	-0.0517089	-0.603517	0.253414	-0.573904	0.373657	0.468121
66.5	5.77537	-0.0790068	-0.408592	0.0355524	-0.109616	0.825361	-1.27309	0.261472	5.63029	-0.341843	-0.171768	0.5729	-0.385096	-0.0987858	1.76033	0.632324	-0.187127	1.90941	-0.623435	-0.867448	-0.795261	6.49895	0.0864345	-0.485624	0.192105	-0.092539	2.81515	0.227756	-0.179183	0.0147904	3.12575	-0.58871	-0.0684261	0.401442	-0.60853	2.70345	-0.48951	-0.822593	0.131203	-0.534024	0.321105	-0.364306	0.0706535	0.417406
66.6	6.15332	-0.26564	-0.425827	0.1127	-0.0744372	0.692989	-1.26712	-0.412029	5.43167	-0.346054	-0.0248037	0.27089	-0.373707	-0.19393	1.92031	0.348951	-0.319483	1.30955	-0.639295	-0.743287	-0.710788	6.10329	-0.0883973	-0.623393	0.183387	-0.17429	2.55442	0.564006	-0.677709	0.14773	2.68834	-0.31452	0.0431334	0.389538	-0.554607	2.90544	-0.473893	-0.931661	0.112738	-0.483971	0.645207	-0.492879	0.236151	0.488014
66.7	7.24763	-0.323126	-0.343421	0.0303181	-0.127713	0.476152	-1.48627	-0.288534	5.57025	-0.514182	-0.462832	0.19816	-0.420127	-0.155721	1.90246	0.320487	-0.0592992	1.73414	-0.499805	-0.90786	-0.742873	5.98086	-0.000140596	-0.595405	-0.0872815	-0.350919	2.43095	0.835838	-0.420769	-0.123129	2.43011	-0.445844	0.0784441	0.212749	-0.565267	2.51312	-0.582278	-0.875531	0.543116	-0.576647	0.0702086	-0.400987	0.121723	0.245649
66.8	7.76432	-0.399913	-0.287922	0.0457237	-0.0617894	0.841399	-1.59455	-0.0361384	5.32271	-0.507868	-0.311976	-0.125988	-0.360284	-0.266614	1.6938	0.204667	-0.247645	1.6498	-0.494549	-1.2574	-0.620726	5.80802	-0.177432	-0.61991	-0.23022	-0.158366	2.72037	0.61355	-0.408931	0.200606	2.76684	-0.326892	0.0445576	0.267566	-0.602442	2.30893	-0.575122	-0.851834	0.482325	-0.425857	0.424258	-0.691271	0.540209	0.243133
66.9	7.75014	-0.415828	-0.400578	0.0974254	-0.132667	0.312746	-1.58788	-0.232831	5.58755	-0.356888	-0.106131	-0.0168016	-0.387885	-0.297258	1.88313	0.292757	-0.370988	0.961198	-0.454144	-1.05686	-0.753593	5.35545	-0.256651	-0.553011	-0.184821	-0.348344	2.88485	0.575195	-0.651822	0.122601	2.8658	-0.522277	-0.0663743	0.357898	-0.588041	2.20031	-0.499912	-0.986802	0.686572	-0.516987	0.0530053	-0.623823	0.190918	0.201246
67	7.71769	-0.487242	-0.248868	0.119382	-0.126675	0.558963	-1.33222	-0.223564	7.03473	-0.493135	-0.0808929	0.126937	-0.412929	-0.233953	1.35185	0.338829	-0.305838	0.74658	-0.639615	-1.50042	-0.757486	5.58574	-0.219391	-0.589346	-0.265623	-0.149205	3.00492	0.373243	-0.66745	0.210888	3.89653	-0.429842	0.084325	0.120353	-0.60337	2.24376	-0.278384	-0.907495	0.24525	-0.613037	0.415093	-0.58346	0.379554	0.0769315
67.1	7.98189	-0.413931	-0.327818	0.047578	-0.181412	0.864268	-1.84184	-0.374832	7.50004	-0.449271	-0.465796	0.279392	-0.367999	-0.146828	1.22345	0.158584	-0.243259	0.771635	-0.522343	-1.222	-0.8502	5.23359	-0.276737	-0.576769	-0.033994	0.0385585	2.72364	0.447938	-0.709513	0.370385	4.81775	-0.370957	-0.0289419	0.426598	-0.62907	2.40367	-0.329675	-0.83572	0.606953	-0.521786	0.482127	-0.481136	0.0737982	0.356849
67.2	7.92298	-0.474635	-0.306784	0.0872125	-0.0167016	0.61711	-1.82162	0.174127	7.80042	-0.562534	-0.0894653	0.613895	-0.422496	-0.0412295	1.17954	0.258983	-0.289999	0.695005	-0.664002	-1.43286	-0.879374	5.93224	0.0119507	-0.533208	-0.0459269	0.17497	2.75168	0.181418	-0.343557	0.423576	5.25907	-0.240427	0.126412	0.337143	-0.680094	2.85232	-0.252789	-0.883459	0.588244	-0.632563	0.365585	-0.699907	0.471278	0.131499
67.3	7.53748	-0.374461	-0.217898	0.205764	-0.130795	0.721476	-2.28453	0.0947951	8.20208	-0.381617	-0.0798795	0.788304	-0.326615	-0.0521862	1.28626	0.270769	-0.426191	1.08488	-0.551354	-1.36748	-0.804024	6.65243	0.0605058	-0.463249	0.168052	0.251573	2.63498	0.143925	-0.527745	0.481275	5.25844	-0.136461	0.321433	0.552164	-0.773652	2.59078	-0.0195981	-0.73871	0.559053	-0.630919	0.809048	-0.582264	0.48887	0.264942
67.4	7.34691	-0.374077	-0.265587	0.195705	-0.0357914	0.894682	-1.70515	0.527991	9.31721	-0.632699	0.200492	1.16031	-0.423029	-0.174841	0.852936	0.444341	-0.26497	0.786129	-0.480947	-1.58091	-0.859431	6.53011	-0.263037	-0.714256	0.103899	-0.0537605	2.26614	0.116822	-0.4393	0.2425	5.84338	0.0282853	0.274061	1.10698	-0.820764	2.4753	-0.113223	-0.788142	1.03001	-0.66217	0.630799	-0.543222	0.865411	0.24597
67.5	6.96387	-0.235457	-0.374242	0.17221	-0.133056	0.812285	-1.41157	0.434778	10.3916	-0.591372	0.417306	1.13299	-0.392338	-0.176212	0.933824	0.235629	-0.0195565	0.864568	-0.382134	-0.845697	-0.794354	6.62765	0.14549	-0.630949	-0.0955399	0.383287	2.23981	0.19975	-0.609191	0.176131	5.53968	-0.0628048	0.255941	2.0125	-0.627039	2.74867	-0.334195	-0.875549	0.775198	-0.528618	1.19032	-0.351783	0.479149	0.443435
67.6	6.88927	-0.383163	-0.29184	0.197482	-0.203927	1.00029	-1.54436	0.572619	10.6453	-0.429841	0.231549	1.23731	-0.455767	-0.145508	1.74427	-0.134886	-0.117567	0.865829	-0.540117	-0.882664	-0.746341	6.75876	0.322911	-0.554623	0.103631	0.0565915	2.22266	0.00653578	-0.352739	-0.0679967	5.46059	0.0644454	0.37431	2.19478	-0.706806	2.89608	0.07072	-0.780309	0.783854	-0.577175	1.09558	-0.283923	0.561714	0.903263
67.7	6.67256	-0.506773	-0.491013	0.191721	-0.242281	0.963605	-1.89829	0.228057	11.1008	-0.525574	0.16406	1.53364	-0.385918	-0.195486	2.89792	0.177706	-0.354591	0.889554	-0.324709	-0.995121	-0.814273	8.30711	0.288765	-0.467221	0.1194	0.0774098	2.14115	-0.20636	-0.257463	-0.0468821	5.5739	0.144172	0.354699	2.15	-0.750095	3.12834	0.171986	-0.905107	0.67061	-0.630785	1.12822	-0.207998	1.00024	0.818181
67.8	6.34913	-0.320632	-0.468406	0.353534	-0.360388	0.786777	-1.40473	0.418485	11.2638	-0.504166	0.314752	1.67944	-0.430307	-0.041262	4.50184	0.0236403	-0.0620884	1.09178	-0.430902	-0.390371	-0.877925	10.2043	0.310588	-0.791751	0.448238	0.762097	1.92621	-0.520637	0.176993	-0.306084	6.04786	0.239987	0.106541	2.31692	-0.758572	3.20242	0.28413	-1.00717	1.11782	-0.658334	1.03393	-0.0103983	0.390307	1.1987
67.9	6.3433	-0.41	-0.596248	0.438855	-0.493544	0.905136	-1.27391	0.273347	11.1156	-0.473387	-0.0170455	1.72804	-0.420845	-0.142811	6.11001	-0.0318722	-0.00520676	1.06583	-0.569966	-0.605384	-0.893273	10.5659	0.344887	-0.714621	0.441402	0.29818	1.72784	-0.246841	0.150149	-0.11458	5.55779	0.331874	0.406549	2.0419	-0.814248	3.16836	0.197943	-0.838001	0.210249	-0.811081	1.45936	0.0543799	0.307107	0.975533
68	5.97871	-0.52865	-0.727564	0.432303	-0.439457	0.823852	-1.31337	-0.166353	11.207	-0.601818	0.0520088	1.52355	-0.433872	-0.0247976	6.40772	-0.300598	-0.167794	1.18465	-0.249009	-0.507236	-0.817388	10.656	-0.0509643	-0.714794	0.467761	0.343938	1.52927	-0.432878	0.196115	0.0608634	5.55078	0.393345	0.152727	1.86477	-0.841325	3.14077	0.15846	-0.870718	0.588265	-0.783629	1.18949	-0.0501661	0.0729111	0.710869
68.1	5.84551	-0.332916	-0.445723	0.510434	-0.374854	0.867757	-0.793929	-0.420588	11.0957	-0.535437	0.237035	1.21746	-0.39779	-0.134127	6.44074	-0.100173	-0.140343	1.05354	-0.361656	-0.753797	-0.800914	10.2391	-0.0467851	-0.780177	0.367294	0.432796	1.43447	-0.613478	-0.177469	-0.113317	4.86984	0.386584	0.129512	2.16878	-0.795146	2.41632	0.00973052	-0.927273	0.972377	-0.689233	1.02479	-0.241108	-0.166065	0.91304
68.2	5.43735	-0.347807	-0.22521	0.532066	-0.456116	0.893937	-0.962449	-0.129333	11.0758	-0.56299	-0.0512717	1.49131	-0.442158	-0.0589713	6.51854	-0.199542	-0.0810432	1.1463	-0.413775	-0.559996	-0.777062	10.6093	0.289891	-0.673907	0.255889	0.189957	1.44148	-0.730949	0.240621	0.049525	4.90276	0.14327	0.000605275	1.90948	-0.756259	2.49578	-0.0306649	-0.957957	0.769825	-0.867253	0.942223	-0.472405	-0.377167	0.680666
68.3	5.16812	-0.363425	-0.378106	0.331244	-0.261597	0.584034	-1.11188	0.215964	10.9446	-0.594406	-0.109983	0.935111	-0.472606	-0.093551	5.90213	-0.149029	0.0155425	1.00489	-0.524813	-0.826182	-0.774388	10.2222	0.102731	-0.696933	0.538647	0.322845	1.32215	-1.2573	0.0183639	0.238702	4.84903	0.156578	0.229245	1.98013	-0.835702	1.89066	-0.00770906	-0.824946	1.17454	-0.735645	1.14867	-0.453712	-0.435485	0.612801
68.4	4.88357	-0.34546	-0.400423	0.365087	-0.34226	0.71178	-1.12254	0.0127052	10.4647	-0.546816	0.115086	0.70283	-0.411336	-0.202705	5.74452	-0.164438	-0.186983	0.970465	-0.48681	-0.997994	-0.846382	10.2224	-0.121144	-0.801499	0.588697	0.487472	1.30725	-0.804529	0.0687589	-0.121225	4.3665	0.0824211	0.0359704	1.73141	-0.797563	2.12311	0.0540904	-0.978314	0.795542	-0.721264	0.689523	-0.492945	0.0292115	0.341843
68.5	4.72951	-0.380033	-0.414797	0.328932	-0.392411	0.70636	-0.660846	-0.148122	10.6827	-0.397485	-0.17617	0.693714	-0.418488	-0.102175	5.2388	0.262462	-0.154463	1.18698	-0.374287	-0.871122	-0.840873	9.34814	0.0278731	-0.775676	0.238083	-0.169034	1.10493	-0.688234	-0.0365423	-0.18981	4.40739	0.00190483	-0.00919929	1.6845	-0.888534	1.96665	0.00757198	-0.767573	1.0115	-0.67246	0.678343	-0.330406	0.392689	0.331825
68.6	4.43783	-0.228525	-0.345054	0.366694	-0.43328	0.522866	-0.416383	0.222278	10.136	-0.551921	-0.190639	0.739249	-0.427766	-0.115283	4.88405	-0.211683	-0.310462	0.792539	-0.436333	-1.12441	-0.786811	9.48437	0.20003	-0.583745	0.318317	-0.0590131	1.07036	-0.884837	-0.097234	0.00993576	4.67911	0.0067004	0.169627	1.43164	-0.742859	2.07899	-0.258137	-0.799701	0.346368	-0.713201	0.515455	-0.480138	-0.0937906	0.253161
68.7	4.22036	-0.282291	-0.334931	0.318933	-0.312434	0.639488	-0.482862	-0.101616	10.2646	-0.423458	-0.080605	0.776095	-0.382764	-0.0820332	4.33476	-0.370933	-0.266454	0.627751	-0.446374	-0.771118	-0.783796	8.7584	-0.0390551	-0.680297	0.103194	-0.0735515	0.946457	-0.21048	0.0190441	0.133656	4.04919	-0.0381923	0.0368601	1.2208	-0.729132	1.58886	-0.0813089	-0.789549	0.588271	-0.580085	0.596644	-0.616411	-0.250262	0.291042
68.8	4.10493	-0.329098	-0.303094	0.356409	-0.239343	0.73706	-0.602323	-0.178474	9.96232	-0.558765	-0.437876	0.724859	-0.479999	-0.143693	4.20402	0.11627	-0.294921	0.819382	-0.662238	-0.744802	-0.887333	8.63464	-0.335082	-0.643185	0.270259	-0.345357	0.77019	-0.379731	-0.250335	0.130061	4.17346	-0.178953	0.057904	1.27408	-0.755092	1.91827	-0.160978	-0.838858	0.220781	-0.775534	0.442787	-0.478404	0.213253	0.393161
68.9	3.85564	-0.226929	-0.493845	0.272815	-0.216077	0.566441	-0.0828709	-0.00116066	9.50931	-0.558886	-0.347912	1.08144	-0.427369	0.0604067	3.46283	0.216047	-0.207789	0.429963	-0.463956	-0.794434	-0.785463	8.13896	-0.21075	-0.912673	0.549878	0.106989	1.03529	-0.322567	-0.166886	0.0888217	4.03838	-0.0791111	0.00666349	1.02111	-0.777316	1.67175	-0.0796006	-0.824316	0.168064	-0.646432	0.0747799	-0.491646	-0.201441	0.282638
69	3.75752	-0.263984	-0.357339	0.191136	-0.206613	0.39143	-0.529713	0.0514407	9.12329	-0.47502	0.0306597	0.585424	-0.422362	-0.00793386	3.2005	0.274863	-0.30645	0.747933	-0.484665	-0.677282	-0.809372	7.75752	-0.305644	-0.788448	0.172753	0.0233731	0.949629	-1.03573	-0.431289	0.13255	4.36094	0.291472	0.0912915	1.04166	-0.636553	1.41874	-0.222897	-0.887158	0.486532	-0.683674	0.313718	-0.758117	0.241746	0.205316
69.1	3.48297	-0.261103	-0.402733	0.229176	-0.0136525	0.626975	-0.042527	-0.0478722	9.24676	-0.379098	-0.202394	0.708901	-0.42711	0.0504226	2.6971	-0.0314923	-0.253198	0.830712	-0.38171	-1.22977	-0.838086	7.44344	-0.38114	-0.668804	0.216053	-0.381094	0.942188	-0.653159	-0.235473	0.0455248	3.99899	0.151623	0.254635	0.999808	-0.666606	1.24952	-0.230102	-0.701806	0.450948	-0.56275	0.439208	-0.627606	0.292201	0.125705
69.2	3.31757	-0.219238	-0.428549	0.18563	-0.19572	0.298753	-0.505317	-0.249075	8.65532	-0.333657	-0.326832	0.405979	-0.471313	-0.193104	2.97373	-0.0346162	-0.207751	0.523717	-0.541878	-1.11355	-0.846999	7.12843	-0.512941	-0.680323	0.314147	-0.226359	0.975447	-0.976563	-0.261781	0.28155	3.21815	-0.0379051	0.0531685	0.765811	-0.867023	1.6816	-0.387584	-0.672216	0.161542	-0.788408	0.419141	-0.490556	0.661515	0.13081
69.3	3.05404	-0.257795	-0.36697	0.199546	0.00423107	0.762255	-0.649894	-0.385486	8.40818	-0.365263	-0.197573	0.477441	-0.370624	0.00251675	2.9901	0.00258357	-0.240288	0.492144	-0.454893	-1.04237	-0.733238	6.05802	-0.521127	-0.679781	0.00535594	-0.220252	0.939125	-0.571857	-0.267635	-0.140092	3.51601	-0.0319705	0.0311962	0.789686	-0.61447	1.36785	-0.255415	-0.803886	0.699169	-0.502799	0.33304	-0.619795	0.759052	0.0819913
69.4	3.05907	-0.280952	-0.302739	0.174772	-0.159469	0.458432	-0.108461	0.0630508	8.15177	-0.4648	-0.078508	0.554998	-0.432563	-0.0144354	2.47105	0.0723271	-0.155585	0.823319	-0.439906	-0.92799	-0.807855	5.78799	-0.427287	-0.889325	0.31097	-0.353604	0.928777	-0.527953	0.275113	-0.129186	2.64952	0.237354	0.159042	0.647016	-0.572546	1.69	-0.367281	-0.860721	0.535443	-0.64835	0.226996	-0.54091	0.738293	-0.0801692
69.5	2.83793	-0.0981957	-0.323604	0.147432	-0.132414	0.321221	0.177208	-0.377492	7.65448	-0.488015	-0.243533	0.470538	-0.371083	0.342577	2.31962	0.08753	-0.230118	0.438291	-0.401504	-0.998952	-0.790533	5.47916	-0.300416	-0.660498	0.368393	-0.442953	0.991426	-0.590298	0.119094	-0.0293865	2.95483	-0.000451795	-0.130302	0.615721	-0.563402	1.71321	-0.280826	-0.788186	0.314287	-0.650832	0.224347	-0.567748	0.812994	0.198448
69.6	2.70199	-0.165089	-0.441881	0.178661	-0.123268	0.728607	0.147945	-0.272635	7.62057	-0.371244	-0.394822	0.438911	-0.406223	0.347392	2.59726	0.445377	-0.294994	0.815806	-0.494766	-0.638401	-0.832049	5.22149	-0.112486	-0.733572	0.10704	-0.477002	0.817095	-0.456727	-0.0170036	0.427947	2.61683	0.0880667	-0.0425161	0.791689	-0.608771	1.48035	-0.267865	-0.780419	0.378919	-0.593958	0.195595	-0.674034	0.909363	0.18823
69.7	2.74811	-0.201722	-0.281834	0.0567567	-0.0989602	0.221517	0.104911	-0.341615	8.14022	-0.400055	-0.175521	0.499087	-0.404066	0.384632	1.80273	-0.0414972	-0.150522	0.321286	-0.291501	-0.744295	-0.692944	4.90535	-0.326213	-0.568821	0.0201135	0.161961	0.630403	-0.332794	0.0426636	0.140837	3.11066	0.139538	-0.00855145	0.969055	-0.660608	1.27921	-0.455473	-0.742074	-0.130259	-0.632319	0.417813	-0.597894	1.03259	0.260367
69.8	2.71429	-0.2296	-0.245379	0.131679	-0.146529	0.698084	-0.419823	0.177459	8.3088	-0.560387	-0.116556	0.564967	-0.458163	0.291257	1.78373	0.453466	-0.277747	0.107449	-0.321145	-1.26024	-0.841206	4.26369	-0.374076	-0.584761	0.134439	0.0181368	0.540327	-0.58952	-0.0750928	0.300944	3.34363	0.0313962	-0.217033	0.64521	-0.535829	1.43564	-0.00301168	-0.782308	0.0947125	-0.628305	0.0917935	-0.630514	0.945018	0.358984
69.9	2.92221	-0.3884	-0.228774	0.166264	-0.0780645	0.577204	-0.492859	0.0435122	9.38388	-0.415491	-0.301959	0.638145	-0.387664	0.547937	1.39415	0.222845	-0.242124	-0.0936216	-0.403663	-0.65155	-0.868669	4.17825	-0.140203	-0.599664	0.210084	0.137558	0.35015	0.243499	-0.0829776	0.168288	4.85525	-0.0493183	-0.201223	0.66964	-0.638097	1.25826	-0.126455	-0.746984	0.171569	-0.50532	0.37656	-0.663116	0.861851	0.188426
70	2.81712	-0.204658	-0.023343	0.0597397	-0.0626908	0.532071	-0.717452	0.16786	9.88068	-0.371194	-0.388021	0.562222	-0.415058	0.494625	0.923483	0.410532	-0.106397	-0.288812	-0.606486	-0.747707	-0.770906	3.92553	0.176387	-0.432139	-0.0240644	0.318541	0.380291	0.114743	-0.403527	0.338813	6.47701	0.221694	-0.290737	0.49521	-0.659295	1.0355	0.0635284	-0.832772	-0.0404567	-0.479736	0.177394	-0.56877	1.0684	0.121871
70.1	2.7147	-0.277965	-0.101175	0.125326	-0.416249	0.703124	-0.964533	-0.265261	9.96002	-0.585938	-0.754802	0.635544	-0.368056	0.548408	1.19846	0.119049	-0.161305	0.23089	-0.476122	-0.902945	-0.957736	3.38718	-0.340752	-0.450304	-0.0351415	0.789491	0.190813	0.354868	-0.226262	0.135947	6.91976	0.113139	0.0544371	0.415746	-0.659539	1.03172	0.258312	-0.768212	0.0437207	-0.480109	0.171559	-0.659947	0.642718	0.355174
70.2	2.69538	-0.22113	-0.0935063	0.0352878	0.0602816	0.95834	-1.05206	-0.300366	9.89368	-0.326718	-0.470283	0.447323	-0.383791	0.396211	0.710079	0.00420462	-0.310456	0.0904159	-0.462882	-0.710278	-0.831567	3.61827	-0.135383	-0.462515	-0.017355	0.57537	0.277012	0.355337	-0.453704	0.289067	7.30826	0.10814	-0.258573	0.661206	-0.734956	0.946539	0.205382	-0.764345	0.106112	-0.488494	-0.0637984	-0.628454	0.795306	-0.0341154
70.3	2.47484	-0.249111	-0.0823045	0.121325	-0.143053	0.394703	-0.898274	-0.307121	9.35207	-0.342383	-0.662062	0.554371	-0.374757	0.456546	1.09984	0.0563902	-0.228637	0.270424	-0.419414	-0.717341	-0.824897	3.70242	0.194788	-0.499071	0.31325	0.360736	0.163142	-0.125482	-0.166602	0.117572	6.57549	0.0783104	-0.200531	0.521922	-0.585919	0.910991	-0.0853364	-0.731012	-0.155237	-0.456696	-0.206849	-0.773391	0.273122	0.31257
70.4	2.6641	-0.0947738	-0.167113	0.0618314	-0.0214363	0.957107	-0.989294	-0.206606	9.43225	-0.452983	-0.322051	0.7977	-0.366142	0.294083	0.882421	0.440883	-0.0901278	0.321705	-0.465074	-1.10329	-0.823056	3.68807	-0.145901	-0.32168	0.133135	0.608476	0.249127	-0.0894247	-0.336102	0.0251145	6.58686	0.0879317	-0.183993	0.496881	-0.636909	0.734582	0.0469063	-0.751572	-0.262859	-0.501074	0.0185496	-0.82316	0.123391	0.326089
70.5	2.45778	-0.233155	-0.201259	-0.0119743	0.0752107	0.640816	-0.562239	0.0680157	9.20604	-0.362989	-0.252615	0.466762	-0.31626	0.490511	1.14653	0.144811	-0.130341	-0.155824	-0.343899	-0.850441	-0.67783	3.98638	0.13107	-0.570199	-0.0955519	0.56465	0.413725	-0.0986066	-0.366162	0.342073	6.6391	-0.0217284	-0.381436	0.552219	-0.600828	0.801902	0.0834914	-0.781375	-0.271721	-0.448083	0.0524082	-0.934506	0.345336	0.415648
70.6	2.3451	-0.208172	-0.16552	-0.00282134	0.0230282	0.304963	-0.795845	-0.548781	8.50499	-0.512574	0.135912	0.732585	-0.376836	0.424641	0.740892	0.415032	-0.178933	0.299052	-0.384069	-0.877008	-0.720992	3.6927	-0.0918883	-0.572407	-0.0862087	0.475906	0.371087	0.110527	-0.264766	0.335014	6.17826	0.17655	-0.142268	0.406684	-0.505	0.915319	0.0711127	-0.844474	-0.533188	-0.53866	-0.114853	-1.0391	0.127974	0.58239
70.7	2.10255	-0.203084	-0.182083	0.0436108	-0.0445193	0.638198	-0.323707	-0.282204	8.5544	-0.606292	0.261071	0.669474	-0.395999	0.319961	0.790248	0.136446	-0.3752	0.289413	-0.288486	-0.605946	-0.811711	3.4363	0.179413	-0.375693	0.128007	0.102899	0.434948	0.026484	0.0208372	0.549332	5.71388	0.00904554	-0.114696	0.437696	-0.603083	0.905303	0.0180905	-0.719952	0.072238	-0.410977	0.12079	-1.04479	0.023974	0.329407
70.8	2.11471	-0.175052	-0.220975	0.00263515	-0.025665	0.659096	0.11571	-0.470147	8.07691	-0.386925	0.385937	1.04587	-0.414481	0.306301	0.669957	0.509789	-0.148209	0.252006	-0.522388	-0.977513	-0.790199	3.26192	0.142799	-0.433894	0.0212168	0.344695	0.641863	-0.257398	-0.366714	0.551177	5.5034	0.243155	-0.177057	0.574688	-0.535477	1.02994	0.134781	-0.695825	0.0818582	-0.424296	0.271557	-0.538342	0.440197	0.443205
70.9	1.90956	-0.13523	-0.222308	0.0581418	-0.0655355	0.547175	0.165922	-0.502265	7.55404	-0.446775	0.604074	1.1713	-0.363939	0.0977079	0.504087	0.368347	-0.281089	0.492711	-0.234582	-0.914145	-0.886427	3.55988	-0.194892	-0.544184	0.0592464	-0.143184	0.986851	0.205053	-0.072457	-0.0992726	5.11249	-0.0921937	-0.272794	0.366693	-0.643524	1.22316	-0.0855249	-0.912778	0.0455245	-0.376638	0.224404	-0.674406	0.474892	0.535073
71	1.7104	-0.119157	-0.234899	0.023147	-0.055418	0.542577	-0.0634708	-0.357833	7.3017	-0.359665	0.121777	1.08239	-0.333017	0.205469	0.363897	0.555903	-0.355672	-0.345462	-0.360923	-0.70657	-0.750095	3.75752	-0.00745159	-0.625391	0.307594	0.060067	0.982993	-0.438744	-0.273637	0.194889	4.85229	0.216212	-0.117591	0.177262	-0.482087	1.24975	0.0409984	-0.815892	-0.272767	-0.301886	0.0909168	-0.602103	0.120882	0.689606
71.1	1.64264	-0.0584594	-0.266965	-0.00855577	-0.0845486	0.693049	0.0823298	-0.402205	7.07908	-0.410313	0.0672755	0.853569	-0.37594	0.0989766	0.767687	0.237367	-0.447959	0.356964	-0.388741	-0.82802	-0.733718	3.51149	0.186229	-0.34721	-0.0167344	-0.0328937	1.11391	-0.227519	-0.260628	0.30856	5.01541	0.0817238	-0.160068	0.332995	-0.448072	0.833118	0.0254227	-0.88707	-0.257726	-0.424082	-0.0566737	-0.765797	0.208824	0.592173
71.2	1.54934	-0.0689016	-0.228443	0.069628	-0.0148002	0.555876	0.457528	-0.566992	6.60657	-0.424114	0.332898	0.778561	-0.37388	0.0470192	0.460663	0.47361	-0.340342	0.226687	-0.402436	-0.968916	-0.664581	3.27398	-0.0936605	-0.6366	0.0690753	0.326861	1.24697	-0.0311442	-0.382336	-0.0140136	4.18452	-0.104166	0.0562116	0.483627	-0.40172	1.09183	0.0974855	-0.774537	-0.127652	-0.280852	-0.253467	-0.228952	0.242026	0.612299
71.3	1.52309	0.0185712	-0.214019	0.00985939	-0.0953504	0.378186	0.364011	-0.628509	6.32093	-0.310673	0.58929	0.668118	-0.365334	-0.00786837	0.479177	0.594556	-0.395882	-0.256474	-0.397505	-0.496986	-0.647731	3.83762	-0.087954	-0.556393	0.0125048	0.0715789	1.28704	-0.221876	-0.0291225	0.144479	4.29214	-0.128451	-0.144172	0.306203	-0.485133	1.10158	-0.100237	-0.753983	0.0100498	-0.391927	-0.0113076	-0.430747	0.292121	0.728545
71.4	1.45699	-0.184429	-0.314512	0.100519	-0.172017	0.553825	0.0888136	-0.610339	6.09851	-0.428708	0.488078	0.934241	-0.427085	-0.0510398	1.05328	0.702175	-0.114584	0.31603	-0.392202	-0.829531	-0.624796	3.62797	-0.121573	-0.389097	0.0898861	-0.216369	1.38221	-0.0561504	-0.0696294	-0.10413	4.32144	-0.124316	-0.0414705	0.167312	-0.516691	1.10777	0.0330632	-0.865017	-0.0894024	-0.375578	0.0622085	-0.246649	0.580126	0.335823
71.5	1.37588	-0.010535	-0.121983	-0.0323656	-0.140126	0.579905	0.431171	-0.701256	5.81142	-0.35423	0.540779	1.00363	-0.368116	0.0289346	1.49155	0.63868	-0.206855	0.159297	-0.505688	-0.807952	-0.649149	3.41927	-0.334012	-0.584392	0.283545	0.0759798	1.33388	0.10654	-0.0323996	0.256116	4.06874	-0.0689787	-0.18549	0.18091	-0.544957	0.951031	-0.122256	-0.794937	-0.430744	-0.331705	-0.0301114	-0.293821	0.385631	0.406717
71.6	1.12184	-0.00883377	-0.366272	-0.0082848	-0.0396786	0.350495	2.17435	-0.289796	5.33618	-0.344367	0.406835	0.609329	-0.333127	-0.0656019	1.87178	0.0953773	-0.0812935	0.128099	-0.431649	-0.709371	-0.648483	3.21018	-0.168649	-0.489194	0.111944	-0.143687	1.27927	-0.169954	0.00220122	0.469039	3.39168	0.11142	-0.211833	-0.0387402	-0.551549	1.00244	-0.270778	-0.937061	-0.228766	-0.395668	0.0676883	-0.395283	0.412152	0.544906
71.7	1.26137	0.131852	-0.185034	0.0530743	-0.0263204	0.290857	3.20723	-0.38691	5.45714	-0.491876	0.135908	1.0039	-0.391538	-0.216644	1.23093	0.385176	-0.226477	0.000221121	-0.455196	-0.832969	-0.5901	3.1791	-0.325996	-0.561552	-0.139517	-0.161677	1.2304	0.190355	-0.0477337	0.190165	3.52252	0.120858	-0.383809	0.169097	-0.533634	0.881818	-0.244059	-0.907847	0.270185	-0.435802	0.0623911	-0.340155	0.140535	0.499053
71.8	1.15048	-0.041131	-0.136204	0.0573509	-0.18531	0.370783	3.91936	-0.420568	4.6687	-0.418655	-0.0727114	1.37073	-0.341539	-0.116236	1.70542	0.0706234	-0.215646	0.14264	-0.627155	-0.622665	-0.677275	3.32103	0.122126	-0.687869	0.124178	0.0330842	1.21331	0.275772	0.0957891	0.163205	3.49444	-0.10382	-0.114017	0.058164	-0.571469	1.04917	-0.0883399	-0.82348	0.164632	-0.260051	0.24407	-0.56683	0.218387	0.648458
71.9	1.27272	0.00612659	-0.190906	-0.00101206	-0.182829	0.470961	4.00568	-0.239164	4.62133	-0.238815	0.384284	1.06261	-0.427814	-0.10747	1.25435	0.404213	-0.228547	-0.22895	-0.430552	-0.522068	-0.747344	3.33141	-0.191377	-0.730909	-0.0445497	-0.230108	0.897313	-0.150932	0.0282569	0.0747851	3.38581	-0.0310133	-0.558699	0.0734439	-0.557217	1.08363	-0.195728	-0.87362	-0.615332	-0.391767	0.0997529	-0.456343	0.366504	0.24734
72	1.23641	-0.0400485	-0.323662	0.000706522	-0.124658	0.551702	3.67923	-0.204829	4.60607	-0.293489	0.231376	1.21136	-0.381932	-0.0763936	1.32012	0.640846	-0.1651	-0.477857	-0.443382	-0.581467	-0.689868	3.16108	-0.0306851	-0.526866	0.203533	-0.595621	0.90091	0.176791	0.0385827	0.370064	3.40219	0.149013	-0.261919	0.307211	-0.575892	0.905503	-0.314397	-0.850319	-0.148133	-0.36947	0.397463	-0.547893	0.388158	0.451245
72.1	1.2218	-0.0826729	-0.21336	-0.0886691	-0.0156909	0.703661	3.67069	-0.312422	4.50936	-0.336515	0.257734	1.32007	-0.343111	-0.188915	1.21754	0.138675	-0.260625	-0.140712	-0.416179	-1.02257	-0.698695	2.77015	-0.169508	-0.505669	-0.0489375	0.11148	0.856525	-0.295751	0.0592344	0.0752168	3.13904	0.178491	-0.50555	-0.117107	-0.613391	0.960666	-0.226734	-0.846461	-0.46158	-0.333086	0.0793741	-0.707536	0.148294	0.190682
72.2	1.0584	0.0396778	-0.107666	-0.0911484	0.0484156	0.655136	2.62205	-0.281567	4.38149	-0.331424	0.217987	0.934762	-0.338191	-0.0810874	1.11772	0.23164	-0.229188	0.0483487	-0.494632	-0.701159	-0.816569	2.64818	-0.0262211	-0.438983	-0.00834418	-0.123789	0.732354	-0.243465	0.413952	-0.0843211	3.55601	0.0824058	-0.37461	-0.114145	-0.596934	0.748285	-0.151337	-0.823823	-0.0775634	-0.378791	0.11945	-0.702726	0.385281	0.234059
72.3	0.983034	-0.0345127	-0.218146	-0.0474105	-0.0322946	0.360747	3.00014	-0.334422	3.9289	-0.205901	-0.104138	0.956804	-0.334028	-0.0826741	1.07859	0.5578	-0.212789	-0.129306	-0.436335	-0.767506	-0.735316	2.64735	-0.258083	-0.688054	-0.0244014	0.104428	0.651185	0.242688	0.3384	0.409865	3.17871	0.0162245	-0.699849	0.281078	-0.592437	1.10601	-0.568716	-0.826977	-0.112843	-0.298956	-0.134696	-0.48728	0.189334	0.0870264
[truncated: 3,063 more rows]
