# Supplementary material for: Activity dynamics of amygdala GABAergic neurons during cataplexy of narcolepsy
Source: eLife. 2019 Aug 14;8:e48311. doi: 10.7554/eLife.48311 (PMC6703899; doi:10.7554/eLife.48311)
Supplement: Figure 3—source data 1. [file elife-48311-fig3-data1.xlsx]

## Sheet: Sheet1
	Unscored cells transition			REMS-ON cells transition			AW-ON cells transition
Time	Z-score (Mean)	SEM		Z-score (Mean)	SEM		Z-score (Mean)	SEM
-150	1.95659	0.22919		0.593363	0.060626		1.83425	0.121631
-140	1.79602	0.1557		0.425286	0.073211		1.68496	0.092339
-130	1.62264	0.16		0.472664	0.03676		1.64332	0.153939
-120	1.92548	0.16		0.5078	0.055489		1.70829	0.163022
-110	1.92909	0.18		0.565278	0.043789		1.78093	0.149456
-100	1.81305	0.14		0.973734	0.108602		2.14547	0.233158
-90	1.5184	0.13		0.828969	0.09039		1.88868	0.160711
-80	1.7005	0.121265		0.711633	0.072855		1.69636	0.09469
-70	1.80756	0.208674		0.595371	0.095101		1.5841	0.104999
-60	1.56348	0.129983		0.859271	0.058482		1.76504	0.1732
-50	1.30285	0.09		0.998742	0.102937		1.8196	0.126659
-40	1.59759	0.11		0.975656	0.123946		1.80606	0.213204
-30	1.4762	0.12		0.638433	0.08282		1.49649	0.129576
-20	1.34872	0.12		0.458334	0.051416		1.22035	0.070512
-10	1.59762	0.166594		0.546278	0.067938		1.21985	0.060322
0	2.34992	0.266081		0.615926	0.044285		1.39194	0.090777
10	1.85753	0.202809		0.554028	0.081106		1.0923	0.0629771
20	1.57825	0.144384		0.557693	0.117827		1.13074	0.08744
30	1.66681	0.132668		0.297311	0.084446		0.805188	0.133189
40	1.26022	0.127482		0.264778	0.07253		0.704838	0.083016
50	1.11641	0.126592		0.421415	0.122793		0.868813	0.119948
60	1.4788	0.183333		0.482075	0.081041		1.21297	0.151012
70	1.37928	0.141164		0.544684	0.099462		1.06368	0.091338
80	1.66768	0.155522		0.220651	0.018952		0.654915	0.071501
90	1.80474	0.1419		0.046427	0.000867		0.4731	0.0794072
100	1.06761	0.121563		0.037054	0.009541		0.651829	0.064787
