# Supplementary material for: Activity dynamics of amygdala GABAergic neurons during cataplexy of narcolepsy
Source: eLife. 2019 Aug 14;8:e48311. doi: 10.7554/eLife.48311 (PMC6703899; doi:10.7554/eLife.48311)
Supplement: Figure 4—source data 1. [file elife-48311-fig4-data1.xlsx]

## Sheet: Panel D data
0.34554	0	0	0	0.26364	0	1.2298	0.77112	0	0	0	0	0	0	0	2.2274	0	4.8008	0	1.9534	2.3567	4.4158	0	0	6.3343	4.6256	4.0648	0	0	2.1515	0	0	2.6444	1.9544	0	0	0	0	6.7023	0	0	0	1.5434	0.20228
0	0	0	0	0.60363	0	0	1.0014	0	0	0	0	0	0	0	0	0	12.198	0	0	3.1204	4.8519	0	0	8.6622	0	4.6187	0	0	5.9997	1.8037	0.93156	2.7731	4.504	0	0	0	2.3668	6.8986	0	0	0	1.5308	0
0	0	0	0	0.47432	0	2.2264	2.9715	0	0	0	0	0	0	0	3.1439	0	5.2192	0	2.3845	3.5526	4.7562	0	0	9.5872	9.6202	6.3345	0	0	6.5109	2.6435	0.93671	0.58711	4.9479	0	0	0	0	8.8356	0	0	0	4.8807	3.2223
0.19543	0	0	0	0.79895	0	3.566	1.1035	0	0	1.1343	0.11974	0	0	0	5.2109	0	7.5226	0	6.4111	2.1599	4.9964	0.26995	1.4382	10.985	15.503	7.7257	2.2918	0	5.4498	3.9823	10.505	3.6988	9.2038	0	0	0.78764	0.7913	7.4901	0	0	0	5.5822	2.082
0.52332	0.54676	0.67236	0	1.158	0	4.663	2.7557	0	0	2.1539	1.2832	0	0	0	5.1177	0.043027	10.797	0	6.4049	2.1129	6.3687	1.7541	0.74138	11.146	11.281	9.7693	2.9692	0	5.5424	6.5341	17.149	5.1994	11.636	0	2.3849	1.2075	2.2196	15.239	0	0	0	9.8749	8.1928
0.16131	0	0.74672	0	1.9489	1.5501	5.3661	4.006	0	0	2.6919	2.2084	0	0	0.25484	5.1892	0	11.732	0.79079	4.7107	3.3388	2.9872	0	2.1697	7.7675	17.985	10.949	0.75003	0	0	3.0426	19.254	2.2306	13.139	0	3.9591	2.0079	0.72598	16.641	0	0.44154	1.0106	10.41	4.6129
0	0	1.5052	0	0	0	1.4404	6.1051	0	0.11555	1.702	0	0	0	2.2117	7.9705	0.3801	8.9606	0	8.1046	3.9718	5.8852	1.5449	1.8605	11.37	13.067	11.296	2.9257	0	1.0872	0.36367	20.917	5.2457	16.906	0	3.7685	3.8092	0.88528	19.332	1.4488	2.9417	1.068	9.7897	7.0531
0.59788	0	1.9661	0	0.014125	1.1698	0.84749	6.5078	0	0.48415	2.4619	0.41399	0	0	0	9.4063	1.336	10.034	0	9.9066	4.7113	2.5167	1.106	0	13.658	16.563	11.582	1.931	0	0.029948	2.7972	20.774	3.9055	18.707	0	2.8013	3.8584	0.64815	22.017	0.59187	3.4349	1.154	12.111	8.2763
0.22113	0	2.1867	0	0.71094	0	1.5342	6.0179	0	0.32114	2.8023	0	0	0	2.2736	6.507	0.45796	15.075	0	8.4225	4.6225	2.5536	4.938	1.0391	7.411	11.103	11.609	2.0193	2.1612	0	6.2575	19.04	5.1436	20.158	0	5.0041	2.231	0.91533	19.033	1.7326	4.0834	2.1625	12.29	6.0705
0.53636	0.29542	0.73594	0	0.81129	0	2.2708	8.0303	0	1.3135	1.0536	2.1229	0	0	1.013	8.6685	1.1653	7.205	0	6.9671	4.8392	4.1895	4.578	0.05969	8.9988	14.007	11.173	1.5276	0	4.7674	8.7824	20.536	3.7223	20.224	0	4.6427	5.1248	0	15.397	1.9304	2.8594	0.79813	13.318	8.8385
0.6278	0.21137	1.0613	0	0	1.2494	0.52115	4.4285	0	0.98146	1.5723	0.72345	0	0	2.5074	6.8478	0.11295	12.113	0	10.713	4.1274	3.8814	9.8397	0	6.9989	15.319	10.585	2.1029	1.4277	0	3.9339	11.558	2.9952	19.007	0	5.2346	1.1759	0	16.109	1.914	1.1311	1.2622	10.098	8.6478
0.73422	0	1.4871	0	0	0	0.61878	4.1566	0	0.85992	1.4967	0.097881	0	0	1.0064	8.7002	0.37204	5.8084	0	6.679	4.4675	5.96	7.2096	0	6.5506	9.9976	10.472	2.8275	0	0.73549	1.4297	13.692	0.24405	19.275	0	6.247	1.6526	0	17.708	2.6507	5.2591	0	8.6724	8.457
0.98308	0.42993	2.012	0	0.81383	0	0	4.6804	0	0	0.38846	0.22738	0	0	1.1093	8.9919	0	13.125	0	4.8417	3.369	3.6751	1.2805	0	8.9961	20.736	9.7762	2.2226	0	0	0	10.574	0	16.059	0	4.8909	2.3939	0	14.193	3.7137	1.5977	0.51098	8.8725	7.7816
1.0425	0.41213	0.98714	0	0	0.67261	2.0058	7.4351	0	0.88065	2.9366	0	0	0	4.4763	7.2758	0	13.251	0	8.5139	3.1996	2.6602	7.0645	0	5.8019	15.301	10.281	4.6826	1.5148	0	2.7733	13.248	3.3186	17.276	0	8.7552	4.2822	0	14.854	3.4682	2.9198	0	6.8939	5.3252
1.4044	0	1.5255	0	0	0.73808	0	5.863	0	0	2.4629	1.0168	0	0	5.4983	8.0348	0	9.2771	0.14741	6.2358	3.0976	3.4274	6.6202	0.41205	7.3298	11.967	10.082	4.0499	4.4956	3.7587	5.3073	11.333	6.1664	17.918	0	8.5129	2.4245	0	19.171	4.9261	2.2829	0.43163	12.812	9.4782
1.8447	0.18436	1.8921	0	0	1.7608	2.9446	8.0991	0	0	4.4735	1.8763	0.16786	0	7.6518	10.596	0	9.0769	0	7.0174	2.9604	3.8767	9.2415	0.24913	6.415	9.6624	10.869	3.8405	1.6301	1.7208	2.4555	10.647	5.0643	19.953	0	13.113	3.6382	0	17.622	8.4764	5.526	2.2105	13.433	11.781
0.89836	0	2.7858	0	0	2.9654	2.0102	8.5152	2.5644	0	4.9973	0.53267	0.37924	0	6.922	9.5401	0.10577	9.9477	0.75618	9.2855	2.5427	3.5869	8.6156	0	6.5129	12.63	10.601	2.9883	2.9145	2.9405	5.4962	12.031	5.2238	21.137	0.069432	8.5199	2.2644	0	22.295	8.9773	4.5494	2.8023	12.193	13.161
1.2414	0.92776	2.6265	0	0	2.2321	1.8044	8.7688	1.4885	0.64084	6.4261	0	0.32223	0	7.0565	6.6705	0.0052351	12.225	1.3765	8.5551	2.2911	4.2509	7.9774	0	10.337	15.007	9.4944	2.137	3.8445	2.9045	4.4707	13.111	3.1277	24.613	0	14.302	7.3473	0	20.031	9.3754	5.2578	0.63817	16.213	10.548
1.1954	0.80986	2.9378	0	0	2.1304	0.86036	9.8141	0.82887	0	5.7421	0	0.24038	0	6.9552	7.5787	0	8.6888	1.411	5.8049	1.5848	3.4883	6.244	0	5.7746	13.527	9.9498	5.8644	3.3672	2.2876	5.8726	12.282	3.2101	28.299	0	8.8187	5.944	0	19.311	9.0002	5.3112	3.2773	14.141	12.775
1.2128	0.76925	1.5728	0	0	0	3.6199	9.4607	0.37233	0	6.2546	0.12648	0.75287	0	7.4938	9.0129	0	13.249	0.94136	5.6854	2.0924	0	9.3996	0.22759	6.2544	9.1423	9.8502	6.7199	6.3325	3.3815	8.3948	11.101	0.36649	28.803	0	12.946	6.8239	0.50926	20.069	9.9111	8.7241	3.0017	14.382	11.12
1.0422	0.43095	2.6647	0	0	0	1.9423	9.1348	0	0.66472	7.1881	1.8194	0.5981	0	4.5666	6.4158	0.12284	8.9939	3.3405	6.8166	2.8432	4.6135	10.509	0.097068	5.8741	17.943	7.8916	6.2584	4.0975	0.91934	7.8606	7.2296	4.5295	27.874	0	13.479	3.7938	0	18.405	10.869	6.554	2.3049	10.559	10.613
2.1439	0.48023	3.1841	0	0	1.7607	4.2754	8.0133	0.97719	0	7.129	2.4549	0.44508	0	6.5048	6.0585	0	10.374	0.94285	8.2399	1.9325	1.6783	9.8421	0	7.2809	13.496	9.4252	4.9174	6.1909	0.16272	3.4342	12.904	11.73	27.499	0	13.524	5.0574	0	22.067	10.071	5.2254	3.9119	11.301	10.182
0.89171	0.91231	2.946	0	0	1.6084	1.8677	9.9079	0.069643	0	8.8085	0	1.3	0	7.5426	11.106	0	11.113	2.2169	6.3701	3.9476	3.0006	8.3712	0	6.6898	9.8491	10.128	5.3296	1.1526	3.548	5.1422	8.5868	8.0669	30.975	0	12.998	2.4833	0	21.411	11.462	5.8611	0.70331	13.986	13.435
0.75467	0.37786	3.3726	0	0	2.2307	4.8564	7.6973	0	0	9.0952	0	0.75882	0	7.1491	6.165	0.43288	4.5542	1.7274	9.3581	2.4768	0.60493	7.6242	0	6.4447	10.913	9.7455	6.036	0.36656	6.9123	3.2442	11.21	10.223	31.184	0	11.041	4.4103	0	18.419	12.728	8.8832	1.7656	18.535	13.292
1.4176	0	2.3319	0	0	1.8109	3.4642	6.9995	0	0	7.7512	0	1.9672	0	6.9862	10.097	0	12.403	1.3753	4.276	2.2715	0.72368	10.462	0	4.9499	13.347	9.2136	7.0099	1.6836	1.5742	4.8496	10.116	20.579	26.292	0	6.7773	4.1828	0	20.064	16.755	11.838	4.5203	14.247	13.375
2.0462	0.30956	2.3022	0	0	2.3647	3.2864	6.1697	0	0	6.8091	0.062076	2.965	0	5.1931	8.2333	0	5.0833	0	9.2167	1.7405	1.2038	6.8814	0	1.4839	12.45	6.9684	7.0621	3.8081	0	3.951	6.2947	19.327	27.563	0	13.045	5.5209	0	22.422	19.971	9.7552	0	22.136	14.403
1.4988	0	2.2807	0	0	0.2362	2.796	4.7601	0	0	7.3422	0	3.057	0	2.7064	5.7869	0	7.3432	0	8.444	2.8892	0	8.1132	0.28852	5.1438	15.369	6.5648	4.6137	3.7424	8.4949	7.4332	7.938	19.48	25.725	0	7.388	8.2715	0	21.789	20.591	10.564	0	22.547	12.83
1.1768	0.24953	2.6017	0	0	0	3.8536	5.1674	0	0.53796	6.7582	0	2.6463	0	6.696	9.3343	0	8.8308	0	6.6258	1.9222	0	7.5191	0	5.1224	14.167	7.3536	6.3266	1.1029	4.1672	8.0315	7.0757	24.377	25.516	0	4.9734	7.0034	0	15.556	20.273	6.1902	0	22.141	13.895
1.1237	0	3.496	0	0	0	5.3103	4.4863	0	0	4.5012	0	2.5116	0	5.5713	7.8327	0	9.5131	0	4.6542	0.31334	0	6.891	0	6.0234	6.3049	6.2663	4.5039	0	9.6119	3.4761	4.587	22.161	22.338	0	4.6172	3.6755	1.9437	18.815	17.658	6.2844	4.3918	19.707	15.821
0.29214	0	4.1403	0	0	0.68358	5.1008	4.9231	0	0	4.2355	0	2.3172	0	5.946	7.7298	0	10.378	1.1699	3.3608	0.6246	0	4.4604	0	5.3801	14.505	5.7287	4.959	0	4.1557	0	2.9825	22.029	19.23	0	2.2866	0.074579	0.88636	15.773	17.847	7.9298	0	19.98	16.642
0.36908	0.22802	2.1235	0	0	0.96975	1.7928	3.201	0	0	5.187	0	2.0807	0	3.8475	6.5239	0	7.106	0.054662	7.0988	1.7087	0	3.9268	0	5.7362	10.929	4.4777	4.0183	0	7.2026	2.1438	2.2664	16.759	22.235	0	6.4242	5.0374	3.269	16.232	14.517	6.4581	0	22.364	12.433
0.88951	0	1.1042	0	0	0	4.3747	4.153	0	0	4.1824	0	1.9771	0	4.5225	7.6912	0.18814	5.8317	0.116	5.8774	1.9652	0	6.9836	0	6.8663	10.555	7.0581	5.0968	1.3535	5.2687	0.5861	1.3514	14.419	21.634	0	5.5114	5.0412	2.8153	12.377	15.979	6.5164	0.61663	20.307	13.918
0.86063	0	2.4836	0	0	0.26649	5.0882	3.1833	0	0	4.095	0	1.6444	0	3.8975	9.7762	0	7.1431	0.26349	5.0493	2.0856	0	7.8737	0	7.3244	12.639	6.6177	4.3386	0	5.2574	7.8089	4.9552	15.684	21.963	0	3.9492	1.0643	1.4664	14.239	14.943	8.9889	0	24.655	14.256
0.27114	0	1.0037	0	0	0	2.061	4.5935	0	0	5.2629	1.5032	2.2737	0	3.9997	4.9584	0	4.5651	2.1912	6.5038	0.0036677	0	4.8216	0	9.2939	7.8811	7.8051	3.4911	0	9.5803	0	5.8492	10.51	18.994	0	7.8977	3.6348	2.0333	12.484	15.517	5.3467	0	26.418	14.848
0.039354	0.11342	0.86427	0	0	0	5.2117	2.5086	0	0	4.1778	0	2.746	0	1.8289	8.7959	0	9.3308	0	3.3866	3.7542	0	2.4648	0	9.2916	9.027	7.1593	3.1165	1.4654	7.504	3.7515	0	13.208	19.096	0	3.446	2.8699	1.5915	15.057	16.465	5.6059	0	23.437	19.405
0.87848	0	1.2565	0	0	0	1.2103	4.4813	0	0	3.9138	0	3.0051	0	4.2502	8.6554	0.04482	7.536	0	3.597	3.6029	0	1.7219	0	8.9553	10.881	7.3175	2.5034	0	5.1872	2.772	4.9881	11.798	14.979	0	0.02176	2.849	3.2567	13.451	13.293	4.7141	0	18.622	17.949
0.46476	0	1.9795	0	0	1.1794	4.1895	4.8486	0	0	3.0168	0.1216	2.1716	0	3.1692	6.262	0	6.1045	0	3.498	2.8748	0	4.8384	0	7.2455	6.2	6.6931	3.8856	0	5.472	1.2434	0	9.4291	15.725	0	0	3.5021	3.0955	13.319	12.427	3.0499	0	19.08	17.698
1.4607	0	1.5654	0	0	0	0.41677	4.6448	0	0	2.0974	0	2.43	0	3.6324	8.4856	0	6.0432	0	5.7867	2.3065	0	0.37138	1.2576	8.3289	9.3635	5.8724	2.6473	0	6.4877	2.9104	2.3208	6.7991	14.919	0	1.0275	2.5138	2.7522	11.802	12.837	7.3327	0	18.723	14.032
0.14609	0	0.81444	0	0	0	2.2795	4.471	0.27932	0	3.5071	0	2.5744	0	2.2334	8.3109	0	3.2075	0	5.0271	1.3974	0	2.7297	0	7.3594	9.5093	6.6941	5.2895	0	0.96266	0.30453	4.3592	6.079	11.721	0	2.3477	0.87733	2.7776	14.183	13.141	4.8935	0	19.94	15.614
0.19964	0	0.70217	0	0	1.701	2.1584	3.1329	0	0	2.314	0	2.5141	0	3.1903	4.185	0	5.4133	0	5.7426	1.3666	0	0	0	5.5718	8.5493	3.5667	3.4763	0	1.7503	0	0	5.77	14.008	0	5.6261	1.7208	3.046	4.1194	13.711	4.3052	0	16.557	15.767
0.0038073	0.24681	0.86029	0	0	0	0	2.8331	0.32582	0	0.82068	0	1.4926	0	1.1632	6.8752	0	6.0369	0	5.0332	0	0	0	0	4.9205	8.3157	4.3229	2.8736	1.4893	0	0.022508	3.0668	4.3289	10.769	0	6.5412	3.1549	2.1549	4.4008	11.39	3.223	0	15.801	13.726
0	0	1.215	0	0.42122	0	2.2065	2.8385	0	0.42624	2.3715	0	2.3692	0	1.9449	5.0427	0.032748	5.6343	0	4.304	1.3072	0	0	0	6.13	8.5888	3.8953	1.5866	0	1.0417	0	2.0737	5.6561	10.063	0	0.089732	2.0308	3.0802	2.1509	11.814	5.0424	0	18.566	17.497
0	0	1.0238	0	0	0	1.646	3.3865	0.081539	0	2.8071	0	2.5153	0	0.52352	1.0634	0	3.3066	0	6.6977	0.089504	0	2.0324	0	7.7832	5.784	3.0531	2.9428	1.5292	4.1134	0	2.9292	3.8289	13.231	0	5.3233	0	2.3957	7.1555	11.414	3.1228	0	13.645	16.719
0.45025	0	1.4307	0	0	0.78606	0.9386	5.3955	0	0	3.551	0	2.3205	0	0.21173	5.2735	0	5.2206	0	4.5042	0	0	0	0.63621	9.1104	9.5705	2.1601	4.0344	1.1501	0	0.053314	0.42971	5.8425	9.7116	0	0	0.75611	3.4477	1.9958	11.348	7.2112	0	15.675	20.374
0.43676	0	1.6931	0	0	0	3.4573	1.9417	0.27662	0	3.7198	0.094161	2.2203	0	1.8402	5.8004	0	2.5535	0	4.8058	0	0	2.0011	0	8.112	7.5012	3.2997	4.0864	0	8.5872	0	0	6.4571	17.355	0	0	1.1567	4.104	4.912	10.659	6.6615	0	12.238	16.274
0.21718	0	2.6751	0	0	0.33184	0.72245	2.0047	0.12415	0	2.5999	0	2.4251	0	0	6.3157	0	8.3123	0	4.6057	0	0	1.1379	0.76653	8.6559	7.5045	3.4192	7.0779	0.067242	4.2594	0.33983	1.9763	5.9606	14.837	0	3.1932	1.7326	1.9283	5.899	11.193	5.2202	0	10.82	17.565
0.062875	0.17211	2.3885	0	0	0	1.5417	6.0392	0.67519	0	1.3578	0	2.1749	0	0.53232	6.7614	0	4.9678	0.50158	4.1682	0	0	0	0.421	9.8935	15.618	4.3092	8.9579	2.5553	0	1.5338	5.3096	3.7627	19.746	0	3.6969	2.8541	3.684	4.5393	11.462	4.3097	0	10.863	17.811
1.1097	0	1.615	0	0.13958	0	2.3603	4.5062	0.14534	0	0.40125	0	1.7473	0	0	4.5963	0	6.0451	0	6.8838	0	0	2.5336	0.46867	8.8415	10.014	5.1336	6.3146	0	9.7819	0	5.7582	5.32	17.233	0	0	2.4346	5.3156	8.7539	9.7152	0.18063	0	10.777	16.614
0.7903	0	2.0085	0	0.33049	1.7507	1.6986	4.6883	0.43451	0	2.7097	0	2.2509	0	2.96	5.5944	0.069441	6.7315	0	6.6519	0	0	2.9327	2.4688	12.347	9.0663	5.0554	7.8202	0	3.2148	2.8538	3.1343	1.7634	18.43	0	1.5007	2.5922	6.5283	8.8533	10.659	7.8828	0	15.618	16.086
0.1698	0	1.6633	0	0	0.91112	2.2454	7.7373	0	0	2.211	0	2.1603	0	2.0183	9.4042	0	7.1335	0.14618	5.5577	0	0	2.1394	0	8.434	11.904	5.574	6.8085	0	1.8762	3.5025	1.5233	3.4665	16.058	0	0	2.5312	4.6374	8.9555	12.04	3.2088	0	13.065	15.799
0.52663	0	2.1924	0	0	0.86199	1.8654	6.0795	2.7541	0	2.6495	0	2.2607	0	4.0283	8.599	0	3.7839	0	2.5976	0	0	2.9536	0	9.1794	8.3394	5.5828	7.4322	3.9688	0	0	0	0.99338	16.726	0	1.2795	5.0473	6.9472	7.6839	12.615	5.0391	0	14.695	16.604
0.87789	0.50317	1.7521	0	0	1.3275	0	5.1719	0	0	3.2497	1.215	2.4578	0	2.8073	3.7035	0	6.0766	2.2661	6.1479	0	0	4.4919	0	7.6479	4.8325	6.3369	5.5859	1.8713	3.9273	3.575	1.9391	0	16.461	0	4.5516	1.9959	5.2102	5.7391	12.798	7.7769	0	22.213	13.683
0.59403	0	2.2801	0	0	1.3641	0.67765	4.1518	0.20569	0.069524	3.387	0	1.6638	0	1.7189	5.5364	0	4.2606	2.4878	6.7012	0.28259	0	3.4945	1.1368	8.4053	9.1884	5.6351	7.1198	1.4855	1.083	1.3174	3.8158	0	15.11	0	2.8984	0.13012	7.21	11.834	12.144	5.3254	0	17.999	11.485
1.1366	0.14539	1.6854	0	0	0	3.3062	5.4995	1.5752	0.035681	2.0396	0	2.2086	0	1.7062	5.9229	0	5.598	1.1291	2.9872	0	0	3.5244	0	8.8048	11.465	4.935	6.3386	0	2.7119	9.9425	1.8665	0	14.816	0	0	4.6357	9.0635	16.206	13.719	2.2023	0	19.564	13.229
1.0055	0.19746	1.7656	0	0	0.30291	4.4204	4.4298	0	0	4.0944	0	2.3464	0	0	6.0314	0	13.393	0.7608	2.4122	0.2291	0	2.3291	0.2951	9.2221	12.502	4.397	7.2441	0	5.9934	6.6417	6.1347	0	18.693	0	0	5.3316	9.3526	11.643	11.513	3.0491	0	20.741	10.145
0.73159	0.55342	1.3046	0	0.089461	0	5.2327	2.889	2.0743	0.16079	3.4474	0	1.7283	0	0.53852	3.5014	0	2.4493	1.8051	4.0947	0	0	1.6841	0	7.8007	12.365	3.8852	8.0176	0	4.9725	5.3751	0	0	20.077	0	0	5.251	8.8746	11.548	11.26	6.4406	0	19.874	14.485
1.0653	0.0086895	1.1567	0	0	0	2.2382	4.3813	3.0449	0	3.6955	0	2.4218	0	3.6874	3.951	0.2602	7.6128	2.2319	9.7535	0	0	7.8226	0	9.2517	10.367	3.2647	7.1472	0	8.1517	9.8425	4.048	0	27.747	0	5.7054	3.8647	10.182	13.657	12.082	2.4938	0	20.242	12.096
1.3563	0	1.6902	0	0	0.32367	2.4656	5.7311	3.7202	0	1.9914	0	2.0971	0	0.77266	3.8759	0	10.181	1.7486	6.7232	0	0	7.7938	0	9.1848	11.362	3.9065	7.2017	4.0452	5.4772	0.76794	0.94671	0.90137	21.32	0	4.7014	0.56391	10.047	3.6485	11.396	4.7563	0	19.537	10.186
1.5513	0	0.53734	0	0	0.031312	2.6004	7.1324	3.6584	0	2.3631	0	1.4711	0	1.4321	3.0233	1.0051	5.1891	4.1168	8.5393	0.50281	0	6.1073	0	10.916	14.02	2.5324	5.5118	0	0	2.2302	0.58488	0	24.23	0	1.1002	4.3843	9.6789	6.0925	11.413	7.0732	0	18.097	9.7987
0.97362	0	0.81212	0	0	1.135	3.5485	3.9867	3.5168	0	2.1061	0	1.4244	0	0	5.954	0.11032	2.5888	2.1299	9.1368	0	0	7.2368	0	12.71	7.2112	5.112	5.3542	0	4.7141	4.8082	1.6985	0	22.209	0	1.575	2.3744	11.328	9.582	12.759	7.5212	0	15.778	9.8722
1.1376	0.30734	1.7519	0	0	3.4872	9.029	7.9598	1.4357	0	2.347	0	1.6872	0	0	5.4895	0	0	3.686	4.9704	1.6113	0	3.3349	0	10.937	14.41	3.599	6.0341	0	0	4.9697	3.023	0	22.3	0	0.64295	1.4948	13.564	5.212	12.395	8.7799	0	18.716	11.53
0.9386	0	1.9477	0	0	2.4724	10.375	6.8161	3.0624	0.22502	2.4593	0	2.7013	0	1.8496	2.8732	0.90549	8.1939	3.8571	8.5557	0	0	4.937	0	9.9918	13.563	1.9068	3.642	2.6892	8.0974	0	3.667	0	19.52	0	2.43	2.5255	10.085	9.0989	13.942	8.6843	0	12.265	13.232
1.5766	0.27058	1.3735	0	0	0	7.5666	7.8384	4.0842	0.52143	4.6858	0	2.0259	0	0	6.575	0	6.7602	3.9003	7.2182	0.19435	0	8.1934	0	8.695	14.278	2.6968	8.1514	2.0826	5.3691	5.0678	1.7953	0	25.493	0	1.2069	4.2392	10.467	10.951	15.001	9.5806	0	15.895	11.648
1.9964	0.098219	0.62586	0	0	0.4076	10.172	8.264	3.4517	0.073201	5.0274	0	1.706	0	0.98806	5.1313	0.75105	7.7924	2.6452	10.867	0	0	9.1938	0	10.225	12.243	1.5923	5.8193	5.6864	6.1087	8.0801	2.4837	0	23.824	0	3.8199	6.0538	10.445	9.6301	14.681	9.9741	0	13.525	10.128
1.6742	0.92887	1.5839	0	0	0.22735	10.038	9.2609	3.2645	0	5.9314	0	2.5948	0	0.70636	9.1165	0.16849	10.308	3.2067	9.4246	0.37519	0	13.582	0	7.1668	20.961	3.8143	6.3985	3.5008	3.701	4.1568	2.3194	0	24.724	0	7.0951	5.9078	11.925	13.357	14.583	6.8453	0	14.189	11.29
1.7292	0.2888	2.8065	0	0.78845	4.037	9.7081	9.4475	5.7339	0	5.9253	0	1.4338	0	1.9553	4.5764	0	6.3394	1.1024	11.137	0.16713	0	15.784	0	7.8214	10.3	4.444	9.7432	0	10.029	6.0798	2.8527	0	24.243	0	8.0582	5.8775	10.971	19.352	11.263	8.2627	0	14.969	11.9
1.2666	0	1.6336	0	0	0.23042	7.3434	11.864	2.9949	1.4584	6.0384	0	1.5855	0	1.7133	9.8802	0.21797	9.314	2.1763	6.9534	0.64169	0	18.151	0	6.6532	11.213	4.4398	7.6174	0	7.8098	3.4131	5.6386	0	24.161	0	5.7772	6.4353	10.785	16.871	12.693	6.8438	0	14.293	10.995
1.6867	0.037096	0.9931	0	0.085007	2.1047	6.9602	11.5	2.4253	0	6.3248	0	1.8485	0	0.83231	8.2407	0	7.1169	0	12.808	0.69872	0	17.727	0.82856	9.6651	18.796	4.2451	9.8014	2.9679	4.1621	6.412	4.9488	0.00011124	25.145	1.4583	4.681	4.6336	12.216	19.57	12.467	8.7206	0	14.497	11.318
1.1746	1.2223	1.8728	0	0	1.7497	9.6857	13.918	1.2236	0	8.7066	0	2.5797	0	2.1255	8.6629	0	8.0272	2.3698	9.6595	0.41086	0	20.013	1.8904	9.355	8.7253	4.7772	10.133	3.049	7.5419	7.864	6.2644	0	23.749	0	9.0483	5.3254	10.481	18.015	17.156	12.229	0	14.485	6.7258
2.224	0	1.1022	0	0	2.2874	10.771	14.412	0.69088	0	9.5474	0.071609	3.006	0	0.38707	6.6425	0	9.5046	3.8064	14.409	0	0	20.354	0.29927	6.4605	10.574	1.8398	10.03	7.4068	7.2746	4.9573	2.6107	2.0034	21.196	0.00049217	7.3689	6.7936	10.225	18.841	19.719	12.682	0	12.815	12.667
2.2367	1.3814	1.7345	0	0.028505	3.0297	8.1222	15.384	4.0766	0	12.875	0	2.8686	0	1.5357	7.5777	0	5.5349	4.361	8.1904	0.32862	0	18.418	1.3509	7.138	14.619	3.979	10.256	9.5135	8.5081	11.32	3.1404	1.4948	22.368	0.24706	12.686	6.981	13.412	11.806	19.213	9.1629	0	15.507	11.386
2.0082	0.82305	1.409	0	0	2.8238	8.3156	19.279	0.5103	0	14.746	0.69209	3.0368	0	1.1157	13.001	0	5.8499	4.1389	12.644	1.9839	0	17.99	0.69558	7.9473	14.697	2.9606	12.343	3.18	10.189	6.2893	7.6832	2.2481	23.843	0.079234	15.766	8.5624	10.807	21.749	19.664	10.752	0.48484	18.903	9.7084
2.5508	1.0231	2.9296	0	0.15461	3.9876	8.7858	19.735	3.3813	0.22254	18.571	0.66841	2.7913	0	2.2378	5.8144	0	9.1597	2.802	13.975	1.7386	0	17.191	2.2367	5.5252	12.345	4.2689	13.93	10.707	2.7192	7.7264	9.4061	4.5843	26.889	1.7294	14.487	6.9986	11.078	19.981	19.227	8.1007	0	19.751	12.617
1.726	0.13312	4.274	0	0	2.6832	8.8267	20.705	4.785	0	19.121	0	2.3749	0.28484	1.8904	6.819	0	9.6576	5.1567	15.962	0.75882	0	19.788	1.4191	7.0013	14.671	4.5354	16.192	5.2632	7.1418	8.8282	9.284	4.7608	26.074	4.2937	11.625	7.3211	10.702	23.254	18.592	12.192	0	23.299	12.649
2.6833	1.0877	3.7501	0	0	4.2315	7.1128	20.72	1.6606	2.3922	18.997	0.49357	2.3102	0	1.3533	8.2646	0	13.174	2.7587	15.894	1.9989	0	21.78	1.5354	7.4826	15.654	5.1506	14.635	10.047	13.007	12.335	13.375	4.4993	24.367	3.2347	14.489	9.2824	10.873	25.22	19.102	13.129	0	20.671	11.921
2.5079	0.55471	3.1073	0	0	6.1954	3.9751	19.168	2.1322	0.020723	20.491	0.076259	2.3484	0	0.84914	8.0039	1.4795	4.8633	2.6784	13.689	0.60937	0	22.715	2.0175	6.1963	16.722	7.8944	14.82	7.7255	4.4994	5.7215	12.295	0	26.703	0.59561	18.92	10.156	10.655	27.944	17.903	12.741	0	22.838	13.322
3.542	0.46546	3.7921	0	0	4.3174	6.6341	19.343	1.9152	0	20.12	1.8635	2.883	0	1.8962	6.9215	0	9.8636	5.9826	14.78	1.6944	0	18.831	0	8.1111	20.713	8.1505	15.716	6.4204	8.7116	6.0433	11.866	1.5004	26.326	0	18.09	10.29	12.702	30.366	19.678	10.065	3.3101	22.438	12.961
2.3082	0	5.1532	0	0	4.7945	7.699	17.903	4.4882	0.18589	21.9	1.1942	2.2987	0	0.10898	5.2505	0	7.9515	3.0214	13.871	2.3194	0	24.798	1.8936	3.9907	15.216	7.7826	15.272	4.9475	8.3756	9.9785	16.431	1.402	28.971	0.79046	17.803	10.902	14.21	25.239	18.503	10.883	3.1503	22.508	12.205
1.4882	0.59313	3.6503	0	0.41798	5.3631	7.6499	22.531	0.0032227	1.1808	23.779	0.57486	2.2219	0	0.78531	7.7154	0	7.9013	1.0021	13.422	2.3528	0	23.35	0.55822	9.2075	23.417	7.4429	14.22	6.8444	10.715	11.193	18.639	0	29.297	0	11.406	10.757	12.627	31.617	17.606	13.04	1.137	22.27	13.544
2.024	0.54872	4.7562	0	0	5.5749	8.7878	22.01	2.0084	1.8067	23.212	1.2989	2.0834	0	2.4751	3.7294	0	8.8961	1.1967	14.627	3.0003	0	19.37	0.60944	7.6791	15.02	8.3686	16.07	10.128	11.321	10.12	10.646	0	30.429	0	16.505	10.537	12.065	32.158	16.08	13.277	0	27.445	9.8891
2.3607	1.0114	3.8428	0	0	6.3118	8.3551	21.739	1.0049	8.2538	22.557	0.93569	2.4675	0	2.8341	6.3286	0	9.194	1.6522	14.536	3.4054	0	19.231	0.76511	10.255	11.047	6.2089	14.852	9.4199	3.8274	10.002	17.328	0	26.799	0	19.077	8.8562	13.168	28.484	17.336	10.326	4.1956	22.775	9.9403
3.0944	0.11094	4.2181	0	0	4.2008	6.5762	22.352	0	8.3236	22.028	1.208	2.1896	0	2.7984	6.131	0	8.8375	2.0498	15.225	2.2088	0	14.506	0	6.5342	15.603	5.7354	15.271	12.762	8.9044	8.5037	11.102	0	27.116	0.56597	13.915	8.9169	12.285	30.326	19.248	11.694	1.2259	25.94	11.097
3.1317	0	3.0929	0	0	4.814	5.3466	21.396	3.3491	8.979	22.26	1.4033	2.5313	0	0	8.5495	0	5.6868	1.4737	14.652	1.4686	0	16.972	0	8.1881	15.535	5.2884	13.427	7.5759	6.1345	8.9544	7.9968	0	26.309	0	15.736	10.975	10.613	25.995	17.678	8.7971	4.5728	18.975	9.9879
2.0153	0.45731	4.388	0	0	5.9631	5.7308	19.694	0.42517	7.3098	19.903	0.095556	1.9617	0	4.2425	5.8659	0	8.5003	0	13.402	2.9024	0	14.581	0	8.2285	17.019	4.7031	13.403	12.478	4.5833	6.9379	7.7016	0	25.703	0.65773	13.143	5.0823	10.563	24.602	16.505	13.208	1.3699	21.227	11.71
2.9243	0.96522	3.4041	0	0	3.2425	7.8557	18.743	0	6.5104	19.055	0	2.3048	0	1.8877	7.1745	0	8.3233	1.6959	11.697	1.8201	0	12.236	0	6.6697	15.737	6.4421	12.363	6.6658	2.5502	6.9727	9.1417	0	24.649	1.1449	10.578	4.9659	11.281	27.292	16.172	8.5347	0	21.103	11.579
2.3651	0.29328	1.0631	0	0	4.3014	8.207	16.507	1.8149	4.7135	18.303	2.4024	2.0863	0	3.1582	9.8739	0	9.2916	2.0651	13.377	2.8038	0	14.235	0	7.7041	11.019	5.1712	12.331	3.9207	4.5634	8.746	9.7103	0	24.891	2.2828	12.333	3.012	11.247	21.787	14.399	9.2228	0	20.338	13.156
1.9791	0.32182	3.0729	0	0	4.2973	5.6981	16.239	1.7017	2.0442	15.56	1.5867	1.2414	0	3.5271	4.9313	0	4.2165	1.2282	9.8384	3.6335	0	12.424	1.5896	6.2859	8.242	5.5176	10.166	6.2692	7.1522	6.7546	5.0953	0	21.248	2.2395	10.841	7.317	8.8966	20.357	13.404	11.014	0	18.346	9.7809
1.4983	0.46247	2.5257	0	0	3.33	4.8519	13.38	0	2.9177	16.442	0.049289	1.9874	0	0.56441	7.354	0	9.6661	0	10.749	4.435	0	11.219	0.47651	8.6041	13.171	4.5575	10.755	5.2629	4.4669	6.9488	5.679	0	21.416	1.0063	10.197	4.6008	7.5386	20.185	13.655	8.1641	0	17.056	11.058
1.5922	0	1.535	0	0	3.9194	2.7329	15.106	0	4.3832	15.108	0	1.6231	0	0.33066	5.446	0	6.1413	0	10.928	5.4391	0	11.286	0	10.959	12.438	5.0585	11.107	2.2121	3.8162	7.7972	6.135	0	15.43	0.50198	11.081	7.3887	7.8442	20.242	12.231	8.499	0	14.684	13.842
1.6537	0.2352	2.1189	0	0	0.46693	4.9894	15.393	0	1.6181	14.117	0	2.3801	0	0	7.1483	0	3.0014	0	8.8928	6.8046	0	8.6604	0.2232	10.699	12.559	4.7046	11.306	0.26897	3.7495	4.5969	8.2174	0	16.826	1.2646	6.3073	4.7252	10.222	11.429	15.214	8.1943	0	11.871	12.962
1.5206	0	1.6433	0	0	6.0364	1.4148	18.246	0.19163	1.2511	15.624	0	2.6	0	0.9838	5.2633	0	3.5897	2.0521	8.1269	6.4263	0	8.1181	0.40709	9.445	11.919	2.9747	11.087	1.0455	2.6046	5.4772	6.1864	0.5987	15.356	1.1675	5.7402	4.8804	9.6461	11.972	12.629	10.984	0	11.647	18.277
1.9107	0	0.86457	0	0	3.1114	1.9055	13.839	0	0.17659	13.847	0	3.6912	0	0	1.9684	0	4.9232	0	14.013	7.2355	0	12.819	4.4344	12.422	9.3452	3.752	10.293	0	11.412	5.314	10.491	0	12.918	2.0729	2.7893	2.9546	8.0398	8.5898	14.109	10.968	0	11.833	19.031
1.6569	0	1.075	0	0	0	2.6439	11.372	0	0.58598	11.473	0	4.543	0	0	3.7553	0	6.678	0.31582	10.562	7.066	0	9.0351	6.605	10.842	11.335	3.8659	9.9762	0	7.008	5.8549	7.4747	0	11.331	0	4.0126	3.5987	8.7142	11.538	15.634	4.2818	0	10.13	16.881
0.85828	0	0.039233	0	0	0	1.3617	11.956	0	0.01571	10.698	0	4.4095	0	0	2.0024	0	8.7049	1.1863	13.664	6.5882	0	12.721	7.8915	11.182	12.65	2.5521	8.0687	0	4.4984	6.2492	7.8246	0	14.191	0	2.9041	1.0699	7.2292	5.8915	11.949	8.2719	0	8.8203	15.261
0.51951	0	1.4057	0	0	1.2798	2.1564	10.576	0	0	9.3494	0	4.5891	0	0	2.2747	0.43217	9.871	0	8.3229	7.9574	0	5.7272	9.345	13.459	9.6983	3.6669	8.327	0	0	0.5252	5.1872	0	9.6693	0	2.7788	1.3517	8.5744	0.022907	11.292	8.3106	0	9.3345	20.293
0.73218	0	0	0	0.2337	0.35326	3.3006	10.812	0	0.2329	9.1247	0	4.6115	0	0	2.3442	0.94598	8.878	0	11.852	8.9477	0	1.537	5.1824	11.876	14.216	1.4082	10.528	0	0.28736	2.2178	6.6003	0	12.317	0	1.6915	0.10671	5.9665	3.3507	11.305	5.6243	0	8.3265	16.005
0.89886	0	0.36576	0	0	0.35063	1.6807	11.996	0	0	10.07	0	4.7959	0	0	1.4983	0	8.1133	0	12.244	7.9273	0	4.1079	7.3308	13.589	14.626	3.3596	9.5241	0	5.6136	4.1244	5.9392	0	12.802	0	3.6623	0.16503	7.9747	1.4972	11.007	8.2576	0	9.4214	15.503
1.383	0	0	0	0	1.8528	2.9351	13.597	0	1.7362	13.728	0	4.0764	0	0	2.8036	0	10.041	0	12.236	9.3976	0	6.8946	5.9056	13.091	14.195	1.6431	10.982	0	4.1243	5.1697	7.7809	0	11.747	0	4.2087	0	9.6561	1.4018	12.011	7.7838	0	9.3703	14.791
1.2512	0	1.1307	0	0	2.2738	3.8473	15.077	0	0.24295	16.389	0	3.9545	0	0	3.8482	0	8.2055	0	14.678	8.8739	0	10.479	5.4283	13.282	8.4306	2.0001	12.593	0	1.747	1.4004	9.8529	0	16.339	0	7.071	4.5162	6.2228	8.5148	11.322	8.8049	0	10.868	12.995
0.47872	0	1.0678	0	0	0	1.9404	14.811	0	0	16.07	0	4.1367	0	0	2.6191	0.36279	14.272	1.6634	11.279	9.8397	0	15.253	10.205	11.222	10.005	1.7288	7.6667	0	14.883	3.4886	5.5154	0	16.136	0	9.249	5.4671	3.8623	18.296	8.6544	6.8826	0	14.12	14.729
1.2713	0	1.7498	0	0	1.3186	5.3801	12.247	1.207	0	16.082	0	7.0534	0	0	2.8131	0	16.358	1.1819	11.152	10.951	0	12.751	13.927	9.3015	9.306	1.7728	9.4745	0	7.2453	6.5099	6.659	0	22.204	0.73119	13.502	9.071	4.1354	18.764	11.669	6.5559	0	12.993	16.924
0.77649	0	1.2407	0	0.15424	0.41739	4.9438	12.145	0	0	17.183	0	18.361	0	0	3.1502	0	17.723	0.98654	11.103	11.18	0	10.47	23.83	6.1803	8.7616	1.8341	5.5269	0	8.5592	0	3.6238	0	24.321	1.0651	16.364	10.628	3.8854	14.155	23.345	10.778	0	6.5028	14.278
0.89017	0	0.68705	0	0	0	4.3197	9.8705	0	0	13.483	3.0313	38.76	0	0	0	0	22.416	1.3244	5.8271	16.026	0	3.579	44.389	0.12142	6.2068	3.5837	3.6888	0	1.278	0	0	0	38.779	1.8489	18.801	18.989	2.7679	11.981	35.615	11.287	0	4.9851	17.547
0	0	1.0193	0	0	0	5.2207	10.313	0	5.1992	14.037	7.0017	55.324	0	0	0	0	27.026	4.073	3.7685	19.842	0	1.2051	54.695	0	3.6843	3.6808	0.33511	0	0	1.4003	0	1.038	45.681	4.5881	14.881	23.088	2.2998	19.843	50.43	10.202	0	5.2042	17.731
0	0	2.1691	0	0	0	6.2256	7.4059	0	6.2929	14.805	8.1429	61.13	0	0	0	0	28.437	4.7649	0	19.823	0	0	57.331	0	1.2679	3.4738	0	0	0	0	0	0.40081	50.595	5.2781	15.079	26.187	0.94419	16.717	57.33	9.3965	0	5.2253	18.45
0	0	1.4287	0	0	1.5436	5.1359	7.8998	0	10.484	12.598	8.4101	65.458	0.02267	0	0	0	27.97	5.5002	0	19.033	0	0	57.241	0	3.9493	4.4951	0	0	0	0	0	0	48.466	5.2983	11.901	24.552	1.6739	14.283	61.408	8.3302	0	5.244	15.579
0	0	3.1192	0	0	0	5.5038	7.2246	0	15.255	10.173	7.7454	66.83	0	0	0	0	23.385	6.0297	0	22.55	0	0	54.729	0	0	3.9089	0	0	0	0	0	1.6285	49.87	4.7291	10.706	25.243	1.9455	13.247	62.109	4.4519	0	6.6285	14.369
0	0	2.3003	0	0	0	4.1735	9.9489	0	15.007	12.488	7.3685	67.07	0	0	0	0	21.341	1.9734	0	21.745	0	0	54.237	0	3.9287	3.3593	0	0	0	0	0	0	44.079	6.2621	14.293	21.916	1.539	10.322	63.615	3.0348	0	7.9752	14.433
0	0	0.99916	0	0	0	5.3848	7.1836	0	15.981	10.911	6.3739	66.179	0	0	0	0	19.86	2.9159	0	22.418	0	0	52.386	0	7.8904	3.1203	0	0	0	0	0	0	43.221	7.075	10.125	19.498	0	11.141	66.381	3.0775	0	6.5704	18.018
0	0	0.94215	0	0	0	3.3844	5.7871	0	14.619	10.075	6.0763	66.89	0	0	0	0	21.83	2.7651	0	20.317	0	0	48.782	0	7.3432	4.3873	0.19898	0	0	0	0	0	37.796	5.1025	10.931	21.99	1.5822	9.1257	71.013	2.6742	0	11.582	18.691
0	0	1.9455	0	0	0	7.4633	6.7511	0	14.11	8.1158	2.9428	65.92	0	0	0.66036	0	14.651	1.5657	3.2006	20.864	0	0	49.817	0	9.4638	4.6468	0	0	0	0	0	0	38.416	5.3568	10.819	18.515	2.0078	5.9192	73.936	2.1773	0	13.353	14.908
0	0	1.9297	0	0	0	4.2669	6.7084	0	14.603	8.7713	2.8503	65.246	0	0	0	0	13.048	2.9167	2.5659	21.046	0	0	43.466	0	20.135	7.966	1.2125	0	0	2.4522	1.3315	0	35.559	5.4989	8.3146	18.319	2.3612	3.8961	79.65	6.4289	0	15.961	14.875
0	0	1.2974	0	0	0	2.8655	5.0486	0	14.268	8.5363	2.3362	65.781	0	0	0	0	17.001	4.3111	2.3632	18.502	0	0	42.309	0	14.07	7.8079	0	0	0	0.29747	0	0	37.527	3.5589	7.8266	13.896	3.7823	6.4095	79.106	6.1746	0	16.997	18.681
0	0.22959	2.0592	0	0	0	0	4.5405	0	11.654	9.3073	2.8579	64.712	0	0	0.32902	0	15.324	2.9935	3.3878	18.639	0	0	41.383	0	13.132	8.6796	2.4789	0	0	0	2.1109	0.23312	34.184	4.4764	6.3519	14.336	2.6236	4.892	86.941	4.0533	0	9.4218	13.566
0	1.9466	0.54093	0	0	0	3.1495	5.4535	0	9.4238	7.521	1.4423	63.923	0	0	1.4399	0	18.359	6.1947	0	17.484	0	0	45.507	0	15.672	6.9922	0	0	0	0.5967	3.4816	0	39.083	3.5517	3.6535	12.451	2.8033	7.922	85.442	1.6977	0	11.657	12.339
0	1.8395	1.5805	0	0	0	0.46126	4.7188	0	9.923	6.8147	3.1683	61.835	0	0	1.3712	0	13.775	4.9023	1.8483	16.427	0	0	42.944	0	14.394	6.2801	0	0	0	1.4402	0	0	37.987	3.8459	5.9528	8.2439	1.121	5.3256	83.607	0.27173	0	9.379	11.044
0	0.82398	0.9316	0	0	0	1.1646	3.631	0	6.3079	6.4048	1.2349	60.763	0	0	0	0	9.2251	6.4498	1.8983	15.846	0	0	40.87	0	18.127	6.1011	0	0	0	0	3.0923	0	35.738	3.2926	0.34715	11.398	0.63625	5.4033	81.025	0.81421	0	15.097	10.078
0	0.63124	0.69557	0	0	0	2.5228	2.8911	0	6.3065	5.5948	0	59.124	0	0	1.6059	0	6.3921	1.5138	0	16.297	0	0	37.909	0	8.1748	7.1307	0	0	0	0.8412	0	0	31.48	4.3344	2.8391	8.5478	2.4592	5.0734	80.842	1.3901	0	12.928	9.5069
0.17603	0.79534	0	0	0	0	3.8607	3.5353	0	6.5814	4.8934	0	58.595	0	0	1.2634	0	11.631	0.66255	0	15.454	0	0	38.101	0	5.4644	7.1338	0.018232	0	0	0	0	0	31.321	3.9261	3.2705	4.7403	1.8348	6.2535	79.694	1.9542	0	14.017	9.3937
0	0	1.8903	0	0	0	3.5736	3.7941	0	4.1905	5.5621	0	58.271	0	0	0.58979	0	9.0488	0.84754	0	15.321	0	0	35.812	0	8.2229	6.0907	0	0	1.0133	0	0	0	28.51	3.6105	5.7527	6.5816	1.9572	0	79.341	6.6257	0	19.682	8.5018
0	0.55414	1.1559	0	0	0	2.6742	2.9448	0	5.3539	5.9063	0	57.493	0	0	2.7734	0	9.4984	2.1216	0	14.214	0	0	37.452	0	11.606	7.3157	1.4803	0	0.66307	1.9175	0	0	28.753	0.43099	2.2018	7.2279	2.9335	1.6338	76.973	0.85475	0	17.923	11.924
0	0.40241	0.9798	0	0	0	2.3158	6.5547	0	11.802	7.4212	1.1359	55.746	0	0	4.2516	0	6.4783	1.266	0.83139	14.075	0	0	34.484	0	6.7084	7.7739	0	0	0	0.62759	2.6822	0	30.266	2.7064	0.083002	6.6638	2.8551	0.84122	77.711	2.7334	0	20.364	7.7649
0	0.5147	1.1228	0	0	0	0.46556	6.5166	0	17.466	7.3513	0.37741	54.77	0	0	3.3634	0	5.509	2.659	1.5895	12.017	0	0	32.735	0	10.671	7.4573	0.5203	0	0.80884	1.5395	5.4782	0	32.48	2.8289	2.3747	8.721	0	5.8621	75.172	5.0319	0	21.663	6.6244
0	0.91846	1.6362	0	0	0	0.65984	6.4827	0	21.354	7.8135	1.5155	52.854	0	0	5.2009	0	3.182	2.9032	4.9277	11.75	0	0	31.615	0	11.475	7.9629	1.4377	0	2.2513	0	1.8915	0	28.074	2.6362	2.2433	5.1584	1.2662	9.4046	76.671	4.2667	0	25.019	5.1664
0	0.5278	1.3209	0	0	0	2.5667	5.5088	0	30.508	6.2013	4.0738	51.733	0	0	4.236	0	2.8437	4.3557	0.39317	11.207	0	0	33.506	0	6.6143	8.9468	1.2515	0	0	1.1275	1.7604	0	27.589	2.2864	3.5322	5.1541	0.48298	7.4666	73.78	7.5941	0	27.608	7.9625
0.10108	0.44108	2.4022	0	0	0	0.87874	6.2851	0	34.293	8.4619	3.8432	51.228	0	0	4.8161	0	3.2868	1.3224	6.0646	10.032	0	0	30.03	0	8.4549	9.652	5.2295	0	4.2942	1.7749	5.7448	0	29.76	0.89074	1.5403	8.4239	0.67599	6.9236	71.498	11.005	0	24.892	4.6105
0	0.70816	1.8247	0	0	0	2.2902	7.1762	0	35.075	6.8008	4.2812	49.986	0	0	3.0282	0	3.7977	4.2277	7.1204	10.667	0	0	30.105	0	4.5549	9.7024	4.3827	0	0	4.2655	7.074	0	31.353	0.20176	0.46044	7.7059	1.5824	10.334	70.878	3.454	0	18.817	5.9906
0	0	1.5956	0	0	0	2.5155	4.571	0	32.673	5.7596	4.9501	48.728	1.0765	0	4.7926	0	1.4798	7.5001	4.9149	9.2204	0	0	26.187	0	8.5721	9.8922	2.0942	0	0	2.5904	7.1009	0	37.884	1.3797	0.95795	6.2133	2.0413	5.5841	73.057	8.1997	0	18.541	9.5293
0	0	2.1009	0	0	0	4.3873	6.0443	0	31.611	6.0136	2.874	48.689	0.37781	0	3.9645	0	5.741	7.6125	6.287	7.8285	0	1.2518	27.74	0	4.6475	8.7521	0.10194	0	0	1.327	9.6777	0	43.46	0	2.4926	6.3669	2.5646	6.809	72.59	4.2227	0	19.413	6.3996
0.14092	0	1.1945	0	0	0	3.3757	5.1867	0	32.166	7.043	3.1548	47.199	0	0	3.9278	0	1.6746	7.2876	3.7913	7.692	0	0	25.423	0	7.2157	8.8684	0	0	0	4.6597	5.1332	0	44.554	0	0	6.5524	2.0695	6.4205	69.88	3.7503	0	14.518	4.3914
0.16727	0	1.847	0	0	0	1.8039	3.5093	0	33.56	4.8072	2.1234	46.383	0	0	5.2396	0	0	6.7872	2.7064	6.805	0	0	22.95	0	10.203	6.9445	0.76947	0	0	0.84826	4.6802	0.93784	42.365	0	1.4142	5.9178	2.1555	2.9438	74.487	2.6663	0	10.252	8.2409
0	0	1.1918	0	0	0	1.354	1.8017	0	32.909	3.2492	0.33728	46.307	0	0	7.813	0	1.8381	7.6434	4.1408	6.7867	0	3.1948	22.17	0	14.479	7.3208	2.479	0	0	5.0842	8.1299	0.025499	43.271	0	4.0043	7.3461	0.77029	4.3922	74.695	4.1962	0	16.367	8.1401
0	0	2.0121	0	0	0	1.6198	3.4928	0	30.691	3.59	0.15879	45.856	0	0	3.1677	0	1.7343	8.0087	6.4159	5.8183	0	4.7591	21.283	0	2.4346	7.3419	0	0	0	7.1451	2.3941	0	42.355	0	0.48175	7.0289	0	6.1988	76.739	4.3297	0	18.016	7.3858
0	0	1.7784	0	0	0	1.457	3.7257	0	27.654	3.8577	0	43.915	0	0	4.1297	0	0.025445	5.3934	3.3151	6.5108	0	3.8222	19.125	0	10.882	7.961	1.6499	0	0	7.0883	4.8909	0	40.003	0	2.7028	3.1705	3.8224	10.75	74.723	6.8893	0	18.963	6.8576
0	0	2.4343	0	0	0	1.5561	4.2451	0.2996	25.014	4.0862	0	43.649	0	0	3.7374	0	4.2759	6.1363	5.9988	5.8192	0	4.2642	20.095	0	11.313	7.3595	0.85612	0	0	1.2676	5.1343	0	40.629	0	0	8.018	2.8655	10.307	75.15	5.108	0	14.536	7.4876
0	0	3.2714	0	0	0	0.91489	4.9364	0	23.011	2.4636	0.0050451	42.549	0	0	6.7455	0	0	5.4636	3.9753	4.7426	0	10.896	17.312	0	12.565	6.6976	0	0	0	2.3563	5.9474	0	39.205	0	0	6.3879	2.4803	9.5539	72.037	6.6074	0	20.34	8.7962
0	0	2.0961	0	0	0	1.3873	7.5824	0	30.158	3.0654	0.10834	41.469	0	0	3.8011	0	2.7788	6.2318	7.6857	4.9686	0	4.5479	17.68	0	8.7336	6.5234	0.87757	0	0	3.1229	3.329	0.024722	38.9	0	0.063934	6.6277	2.4008	10.115	72.756	6.542	0	22.85	8.7749
0.43409	0	2.1304	0	0	0	2.6841	6.5205	0	33.606	2.3604	0.97358	40.745	0	0	3.3842	0	5.0477	7.0435	4.9638	5.566	0	3.8088	13.999	0	10.163	8.183	2.6804	0	0	1.2669	3.4048	0	36.443	0	0	8.4945	3.7624	11.003	71.58	3.6959	0	24.824	9.2527
0.96645	0	3.0071	0	0	0	4.5827	5.4741	0.065534	36.252	4.1522	2.4586	39.476	0	0	5.9769	0	2.6207	5.0048	8.3668	6.9644	0	5.8983	16.805	0	9.64	8.136	0.46733	0	1.5407	6.0951	3.7373	0.4371	36.686	0	0.81417	8.348	2.8676	18.926	69.226	6.5534	0	21.848	9.2656
0.77073	0.60109	1.843	0	0	0	3.0788	8.0038	0	43.397	4.0508	1.5119	38.781	0	0	4.1545	0	1.3034	7.2158	8.7973	6.5731	0	9.7348	16.955	0	10.612	9.5017	6.0691	0	0	3.207	3.816	0	34.123	0	0	10.056	5.0186	15.73	67.622	4.7045	0	21.259	6.7083
1.187	0	2.8586	0	0	0	1.3315	7.6113	0	41.639	3.3789	0.28184	38.534	0	0	2.5894	0	7.219	5.9047	7.2258	5.6002	0	4.3257	18.345	3.1326	12.736	9.8465	3.2988	0	1.4159	1.1028	8.6234	0	30.935	0	0	7.8147	9.9223	9.6272	65.119	7.1567	0	17.683	8.0405
1.3766	0	3.5394	0	0	1.1861	2.0387	8.6992	0	40.778	4.7574	2.3364	37.35	0	0	5.2089	0	0.16064	4.583	6.789	5.509	0	4.4305	17.317	0.73828	14.579	9.7851	6.5978	0	0	4.0503	6.5429	0.66711	32.878	0	0.094218	9.3292	8.4353	11.874	65.436	7.4699	0	14.936	8.8967
1.273	0	3.3485	0	0	0	0.11845	12.918	0	41.079	3.6706	0.84279	37.409	0	0	5.0184	0	0	4.994	7.7035	5.3397	0	4.5266	18.674	1.4943	8.7688	9.4048	5.4666	0	3.95	1.1024	4.0839	0	34.049	0	2.1272	5.5926	10.723	11.172	62.017	9.994	0	12.29	6.4969
0.92068	0	2.362	0	0	0	0	10.662	0	50.97	2.8499	1.5117	36.712	0	0	2.578	0	0	6.9101	11.192	6.7092	0	2.4026	20.532	4.4971	16.389	6.3387	2.6981	0	5.2367	3.298	5.1905	0	35.3	0	0.48455	7.8051	7.6654	6.7483	61.531	8.0692	0	15.574	6.0534
1.5473	0	2.8316	0	0	0	0.46191	12.588	0	51.049	2.5913	0.85964	35.97	2.2946	0	0.60341	0	0.39137	7.5611	10.015	4.0601	0	6.2421	20.77	5.1807	15.61	6.624	2.8975	0	6.8922	2.3187	4.7764	0	35.358	0	0	6.3037	7.5649	7.7079	59.007	6.7018	0	13.103	7.1817
0.97032	0	2.7306	0	0	0	0.52804	12.511	0	45.605	3.4941	0.23713	34.369	2.8667	0	0.60987	0	0	7.0513	10.986	6.7493	0	3.1373	20.308	6.0721	11.372	6.679	4.8946	0	3.19	0.80501	1.766	0	35.659	0	0	4.1097	7.7118	7.281	59.493	4.2568	0	11.464	10.807
0.65324	0	2.126	0	0	0	0.63301	10.714	0	43.104	4.9108	0	33.218	4.3493	0	0.59705	0	0	7.0995	6.4746	4.7705	0	0	18.626	5.3027	13.783	6.0105	2.725	0	5.6079	0.30276	3.6205	0	33.562	0	0	0.92226	5.9689	7.3396	57.951	3.9653	0	6.5392	6.3972
0.39194	0	1.6528	0	0	0	2.6234	10.567	0	38.483	3.5048	0	31.896	2.3157	0	0.29084	0	2.4078	3.6257	8.5659	5.061	0	0	16.741	5.1476	12.609	4.596	2.6232	0	1.11	5.1058	2.322	0	33.9	0	0	3.6911	9.5557	4.9718	57.19	5.8365	0	9.0317	9.8316
0.63217	0	1.4494	0	0	0	2.0461	8.8999	0	35.134	1.8534	0	32.109	1.5276	0	3.3665	0	5.5925	3.7953	7.439	4.8639	0	0	16.404	2.9796	14.713	3.8721	2.3505	0	1.7457	2.8634	2.6683	0	30.849	0	0	3.4786	6.967	0.70595	54.635	3.0715	0	8.8858	7.8634
0.68543	0	0.93642	0	0	0	2.3131	6.9696	0	32.849	1.3497	0	32.821	1.7602	0	1.2362	0	0	4.2412	6.7264	5.0295	0	0	17.831	2.2022	16.863	4.1137	0.97407	0	1.9418	1.6587	0.52776	0	29.212	0	0	3.8097	4.8775	0	55.08	5.0327	0	8.5328	12.478
0.65412	0	0.94581	0	0	0	4.519	8.2114	0	32.454	1.2941	0	32.871	1.3505	0	1.9141	0	1.8603	2.6657	6.1244	3.8122	0	0	16.085	2.0827	6.3322	3.1818	2.9777	0	1.1743	2.9329	0	0	27.954	0	0	5.7756	7.2523	7.6307	51.85	1.1075	0	12.057	12.746
0.59393	0	1.4619	0	0	0	5.2539	6.5763	0	29.04	1.2095	0	32.416	0.89254	0	0	0	0	3.4953	2.4284	4.8732	0	0	15.071	0.65766	12.333	3.7314	3.4704	0	0	0	0	0	25.132	0	0	1.2662	8.5583	0	53.16	1.7925	0	12.389	14.605
0.5291	0	0	0	0	0	2.4113	10.104	0	28.063	3.0357	0	32.947	2.7219	0	3.0054	0	0	2.9962	1.6985	5.0063	0	0	14.187	2.7798	19.758	3.9056	4.5946	0	0.89213	2.2686	1.0394	0	24.895	0	0	2.811	6.3976	0	54.029	2.1076	0	13.672	18.028
0.16821	0	0.34153	0	0	0	3.4501	8.5309	0	23.247	2.4731	0	31.357	8.8813	0	3.3483	0	0.14986	2.6665	6.407	6.8919	0	0	16.077	0.98095	24.025	3.0588	2.7123	0	7.0204	0	5.0298	0	24.279	0	0	0.31696	4.1981	0	50.966	3.5927	0	17.226	17.96
0	0	0.069148	0	0	0	3.4155	7.2374	0	21.23	2.602	0	31.169	9.9714	0	2.1282	0	0	1.2546	7.0972	11.431	0	0	14.461	2.0943	21.116	4.4737	2.343	0	4.9771	5.6522	1.9796	0	21.619	0	0	0	4.0078	0.21327	48.71	2.3802	0	11.755	18.415
0.7568	0	0	0	0	0	3.2901	6.6425	0	21.47	1.5209	0	30.862	8.7532	0	1.8109	0	0.269	0	4.6223	16.051	0	0	16.005	0	19.415	5.5174	1.9773	0.46954	5.0655	0	1.2183	0	20.006	6.1544	0	5.9919	3.2974	6.0229	50.963	0	0	7.0381	17.241
0.23081	0	0	0	0	0	2.3261	5.7533	0	18.716	1.9446	0	30.063	8.6017	0	5.446	0	0.96999	0	4.24	22.442	0	1.1189	12.991	0	19.865	4.5287	4.9724	0	4.7961	0	1.611	0	15.365	12.301	0	4.0731	1.9901	8.4565	46.095	0	0	13.42	21.643
0	0.42622	0	0	0	0	3.3499	5.4975	0	17.105	1.3426	0	29.685	9.1434	0	2.1544	0	0	1.3839	3.9734	21.35	0	0	11.785	0	21.362	3.5579	0.80808	0	0.63087	0	0	1.241	13.802	18.464	0	0	1.7035	0	45.789	0	0	10.316	18.096
0	0.29932	0	0	0	0	2.3691	6.3281	0	14.944	3.6263	0	28.694	10.997	0	0.24837	0	0	3.5988	2.4005	18.206	0	0	8.5334	0	30.383	2.6192	1.185	0	0	0	0	0.027974	13.339	18.777	0	1.4176	2.5125	2.3171	44.49	0	0	11.947	20.256
1.2806	0	0	0	0	0	0	5.2811	0	12.061	0.75878	0	28.157	12.077	0.24697	2.1338	0	0	1.7985	3.4376	17.917	0	0	8.7427	0	25.142	1.8832	0.84202	1.2399	0	0	0	1.9481	15.011	17.604	0	0.50614	2.3819	2.353	44.604	0	0	15.955	16.759
1.0155	0	0	0	0	0	2.5157	5.3438	0	11.026	3.6799	0	27.109	11.759	0	0	0	0.84342	1.4566	4.8302	16.229	0	0.12123	10.629	0	24.54	1.4352	1.1698	0.57866	0.33987	0	0	0	13.331	15.229	0	0.91166	1.3093	0	42.252	0	0	15.398	14.343
0	0	0	0	0	0.6647	0	6.6905	0.1142	9.8957	0.082785	0	27.668	9.2438	0	0	0	0	0	4.1702	15.651	0	0	9.8335	0	23.756	0.76815	1.7999	0	0	0	0	0	18.562	13.079	0	0	3.1438	0	41.896	0	0	11.413	12.355
0.73149	0	0	0	0	0.026411	0.034658	8.1614	0	7.6398	2.7829	0	27.266	8.0526	0	1.4241	0	0	4.2782	2.1027	15.265	0	0	7.9557	0.37944	27.436	0.61179	1.8968	0	0	0	0	0	15.994	8.4254	0.29555	0	3.7541	4.4323	39.23	0.18063	0	9.3977	12.878
1.2486	0	0.13268	0	0	0	3.3854	7.7196	0	7.6234	1.584	0	26.922	7.0848	0.1529	1.1676	0	1.6112	0	5.1125	13.594	0	0	10.299	3.0267	22.942	0.33838	4.5267	0	4.2134	0	0	0	20.207	4.721	0	1.4279	3.0289	7.7734	37.909	1.0433	0	11.029	15.49
0.18996	0	0	0	0	0	1.468	9.0592	0	7.1225	1.6972	0	26.114	5.4487	0	0	0	1.226	3.1881	4.4854	11.819	0	0	10.043	0	19.576	0.70658	2.7929	0	0	0.98813	0	0	16.273	7.218	0	0	7.2308	1.9527	38.468	0	0	8.5178	14.783
0.49928	0	0	0	0	0	2.9448	10.253	0	12.908	2.5518	0	25.33	5.3148	0	0.003426	0	0	1.0753	7.6318	13.704	0	0.50331	8.9675	2.7269	19.771	0.55755	6.7486	0	2.1473	2.4211	0	0	17.283	5.9782	0	1.2272	7.2583	4.6065	36.389	2.8666	0	10.859	9.3157
0.51804	0	0	0	0	0	3.3032	9.8018	0	13.945	2.6979	0	25.282	3.1703	0	2.8699	0	0	1.8085	2.6127	11.143	0	0	11.14	7.165	19.65	0	5.0374	0	1.5062	0	2.8896	0	19.735	5.0302	0	0.01198	8.9719	0	35.677	4.9579	0	9.6709	11.782
0.24749	0.2182	0.060729	0	0	0.77773	2.1747	5.1816	0	13.986	0.93679	0	25.628	5.1504	0	1.6609	0	2.5325	0.63783	4.0474	9.8579	0	0	9.3687	0	14.562	0	4.1028	0	1.0253	0	3.443	0	21.446	4.6594	0	0	6.0095	1.0352	36.406	2.0899	0	6.0205	6.7226
0.93824	0	0.10493	0	0	1.2976	2.7085	7.1992	0	12.186	1.0957	0	26.672	4.4576	0	0	0	0.46037	2.6387	1.2825	9.6736	0	0	9.3697	0.8924	12.312	0	3.0963	0	1.8893	5.4308	1.5861	0	21.171	4.1343	0	0	5.9087	1.9275	35.865	0.20863	0	6.958	9.2394
0.11886	0	0	0	0	0.9938	2.4386	5.9575	0	11.212	0.6899	0	27.017	4.3443	0	0.47644	0	2.4698	2.496	0	9.5193	0	0	11.72	0.94557	10.691	0	5.7651	0	0	2.3472	0	0	20.123	2.1725	0	2.0032	7.1622	0.62005	35.935	0	0	6.7707	5.939
0.69885	0	0	0	0	1.1241	0	4.5969	0	9.7081	1.966	0	27.161	2.2052	0	0	0	2.6462	2.4897	1.5146	11.186	0	0	11.096	2.5026	12.061	0	3.4979	0	2.3576	5.0639	0	0	18.065	2.9744	0	0	7.1107	1.1468	36.059	0	0	13.349	6.6026
0.14362	0	0	0	0	0	1.4359	3.3729	0	8.0201	1.6522	0	28.189	3.3029	0	0	0	1.1806	1.6146	2.1459	13.044	0	0	11.459	0.15511	14.715	0	5.3605	0	4.7048	3.504	0.99222	0	18.553	2.6983	0	3.3432	7.6121	6.7437	35.525	0.16879	0	13.284	8.6188
0.33449	0	0	0	0	0	4.401	3.2261	0	7.7074	0	0	27.845	5.0094	0	0.61814	0	1.4776	2.6519	0	11.83	0	0	12.467	2.3387	12.96	0	5.6686	0	7.8	3.3262	0	0	18.652	2.3351	0	0.81574	8.4359	2.7597	35.019	2.736	0	14.53	11.404
0	0	0	0	0	0	3.4147	3.8058	0	9.0766	0.51664	0	27.711	2.4407	0	2.4379	0	0.44959	2.8653	3.6477	12.311	0	0	13.551	1.025	10.304	0	4.8807	0	9.5228	3.6213	0	0	18.131	1.9293	0	0.49506	8.8059	3.4854	33.147	0	0	18.975	7.7071
0	0	0	0	0	0	3.7646	5.7962	0	16.625	0	0	26.072	0.90652	0	0.25051	0	0.37196	0	2.7934	10.767	0	0	12.727	0	0.37721	0	5.7198	0	6.292	5.1379	0	0	14.363	0.074129	0	0.84999	8.8632	2.9154	31.566	0	0	20.152	6.0012
0	0	0	0	0	0	2.7229	3.5556	0	18.606	0.94605	0.047662	25.935	2.1964	0	0.28192	0	0	0	1.8124	9.5143	0	0	14.622	0	4.0367	0	4.2586	0	5.3234	0	0	0	11.444	0.14601	0	0	7.4432	4.8206	30.167	0	0	18.455	1.4982
0.22645	0	0	0	0	0	3.2241	4.1148	0	16.861	1.0722	0	25.828	4.8747	0	0	0	0.62047	2.6128	4.6436	8.3612	0	0	14.611	0	9.6628	0	5.9992	0	12.628	5.8805	2.699	0	14.462	0	0	0.2404	6.0353	6.201	30.638	0.76556	0	18.193	3.08
0	0	0	0	0	0	0	3.1014	0	16.988	1.0702	0	25.24	4.5938	0	0	0	2.6859	1.4909	5.317	8.3459	0	0	13.682	2.4965	6.2729	0	6.1316	0	12.82	3.9406	0.056698	0	10.828	0	0	1.4439	9.2481	6.3834	28.473	0	0	20.147	3.4646
0.15432	0	0.38647	0	0	0	2.6101	3.9361	0	16.029	1.6424	0	25.069	4.1008	0	0	0	1.626	0.70294	5.1466	6.8138	0	0	12.571	3.9605	4.5973	0	5.7054	0	10.645	6.144	0	0	10.318	0	0	0.88121	8.8194	3.4284	29.188	0	0	22.759	3.3608
0	0	0	0	0	0	3.4617	3.3964	0	15.043	0.12519	0	23.902	8.6129	0	0.056741	0	1.361	0.0836	3.8757	6.8815	0	0	13.329	2.6018	0	0	5.0428	0	16.385	0	0	0	12.066	0	0	1.6237	9.133	8.2605	28.781	1.65	0	16.662	6.4443
0	0	1.1061	0	0	0	2.7646	4.587	0	13.526	1.9939	0	22.866	15.17	0	0	0	2.7178	0	4.9323	5.9983	0	0	11.155	2.9382	9.3391	0.14305	7.1809	1.3849	14.901	5.0567	0	0	13.032	0.71518	0	0.99332	8.4223	0	30.728	3.7858	0	14.07	6.4818
0	0	0.83273	0	0	0.93776	3.1371	3.4256	0	12.024	1.5116	0	23.013	23.335	0	1.0414	0	0.98804	0.46839	5.3484	5.2504	0	0	12.182	1.5695	14.322	0	6.0191	0	11.962	6.0366	1.8138	0	8.9572	0	0	0.3963	8.7578	0	31.216	0.5782	0	15.766	6.516
0	0	1.1863	0	0	0	2.8043	6.3828	0	11.342	1.3435	0.12927	22.481	46.008	0	2.7027	0	0	0.062329	4.2316	5.7208	0	0	9.9113	3.4221	5.3208	0	5.5219	0	18.544	5.5175	2.3319	0	10.57	0	0	1.9949	7.9908	3.731	31.334	0	0	12.634	4.1308
0	0	5.9403	0	0	0	1.0164	5.0181	0	9.1738	1.7586	0	21.676	55.477	0	1.0817	0	0	2.992	4.2534	5.4931	0	0	10.55	5.2015	2.8819	0.56162	6.5724	0	12.997	10.782	0.20292	2.0915	12.451	0.39725	0	4.0111	11.065	0	30.479	0	0	12.794	5.7079
0	0	11.222	0	0	0.070793	0	2.4466	0	7.644	2.2654	0	21.972	67.592	0.19357	2.604	0	0	2.7598	5.8046	6.4037	0	0	10.256	5.6934	5.4203	2.9105	7.9677	0	8.6051	15.977	2.8158	1.0102	16.002	0	0	6.8488	8.9712	0	29.719	6.654	0	17.798	7.9703
0	0	22.285	0	0	0.70804	0.84316	3.0327	0	6.9331	1.92	0	20.301	73.806	0	0	0	0	2.0847	6.8657	5.4125	0	0	10.372	7.2257	0	1.7521	7.4163	0	11.199	13.97	0.31205	0	15.21	0	0	15.131	8.347	2.6051	27.875	3.8542	0	18.02	7.1899
0	0	28.185	0	0	0	0	3.4057	0	5.3871	2.6421	1.0746	19.702	77.442	0.57868	2.3101	0	0	2.7882	1.54	3.931	0	0	8.9808	2.4033	0	1.3145	4.899	0	14.127	20.214	0.7409	0	18.756	0	0	16.327	7.7794	6.3321	26.189	5.2259	0	16.104	6.8404
0	0	28.154	0	0	0	0	2.3533	0	5.1866	3.2155	0.13368	19.656	75.482	0	0.81509	0	0	0.15731	3.0045	4.0872	0	0	9.3981	2.9805	0.8563	0.52405	7.825	0	12.297	18.304	0	0	16.777	0	0	14.972	7.7545	8.0103	23.86	3.1199	0	15.377	6.7889
0	0	28.89	0	0	0.90687	0	2.7164	0	3.4905	3.2198	0	18.983	79.348	0	0.42102	0	0	2.1372	4.8513	4.3752	0	0	8.9616	7.7205	0	3.0322	7.9647	0	10.323	22.537	2.3877	0	14.498	0	0	16.712	8.8217	1.2993	26.019	3.4376	0	12.494	4.9926
0	0	29.869	0	0	1.3156	0	2.2709	0	3.6186	1.8265	0	17.99	84.13	0	0.17664	0	0	0.93261	5.5559	3.8073	0	0	6.8587	5.1078	0	1.7931	8.4786	0	15.877	17.351	3.4014	0	10.052	0	0	18.184	7.9204	2.3487	23.508	4.3973	0	9.3569	6.1205
0	0	31.056	0	0	1.0118	0	4.4118	0	3.6311	3.7776	0	17.919	85.074	0	0	0	0	0.28179	4.8245	3.1032	0	0	5.8652	8.5379	0	0	9.139	0	15.347	21.418	3.0635	0	12.208	0	0	14.826	6.4622	0	23.672	3.777	0	9.6567	7.0348
0	0	31.549	0	0	0	0	5.4061	0	2.1852	2.2876	0	17.021	80.502	0	0	0	0	2.3411	5.5264	3.1885	0	0	5.934	7.3462	0	0	9.4202	0	9.2834	20.368	5.6668	0	10.875	0	0	14.79	7.9976	0	22.208	3.3622	0	8.0808	7.2904
0	0	28.766	0	0	0	2.2305	3.3476	0	5.7432	1.9791	0.75691	17.568	76.242	0	0	0	0	0.68449	5.6344	2.8945	0	0	5.3328	7.6486	0	0.059642	6.4404	0	10.559	20.106	1.5615	0	9.1098	0	0	15.341	6.8017	0	22.324	5.1889	0	10.071	7.833
0	0	26.928	0	0	0	1.8486	5.0757	0	4.948	3.4831	0	17.022	74.073	0	2.0707	0	0	1.2098	9.5352	1.9271	0	0	6.2222	6.0568	0	0	8.5918	0	13.261	19.773	0	0	13.922	0	0	16.596	6.1876	1.5949	23.393	2.1798	0	6.6444	6.3297
0	0	25.562	0	0	0	0.024655	5.3669	0	9.0493	4.349	0	17.167	71.598	0	0	0	0	1.7574	17.048	2.2775	0	0	5.9423	8.3266	3.0325	0.47804	7.7977	0	6.3323	17.9	3.7498	0.41811	17.151	0	0	14.906	7.199	0	25.516	1.571	0	11.477	7.4988
0	0	24.386	0	0	0	1.44	4.1602	0	7.9363	3.7238	0	17.787	70.006	0	0.87953	0	1.3358	4.4974	19.15	1.812	0	0	4.7485	5.795	0	1.5814	8.4763	0	7.4159	17.394	0	0	22.107	0	0	11.744	7.3201	0.5618	26.108	0.79041	0	6.6372	9.5838
0	0.19974	23.635	0	0	0	2.6214	3.9348	0	7.4304	1.9964	0	20.152	72.026	0	0.25729	0	0	1.8549	15.861	2.3592	0	0	7.5237	5.27	0	2.2906	5.3326	0	5.1854	16.003	4.2327	0	24.672	0	0	12.162	6.3281	0	33.298	5.0816	0	3.9548	7.585
0	0.6236	23.582	0	0	0	0	5.7514	0	7.7102	4.1255	0	21.244	76.67	0	1.8652	0	0	4.6653	12.703	2.5004	0	0	9.5354	5.0271	0	2.879	7.422	0	1.1308	16.576	1.0756	0.16433	26.229	0	0	13.565	6.5013	1.2156	35.863	2.0429	0	7.1293	9.9569
0	0.3046	22.983	0	0	0	0	3.0535	0	5.8078	1.9957	0	20.718	87.42	0	0	0	0	6.1902	15.242	1.717	0	0	7.2978	4.9602	0	1.6438	4.3811	0	8.6637	17.064	1.6896	0	28.894	0	0	14.651	5.5118	0.62203	34.318	4.1529	0	6.3316	8.479
0	0	21.277	0	0	0	1.2335	3.8856	0	7.2213	4.2383	0	20.178	89.712	0	0	0	0	5.6591	13.616	2.2201	0	0	8.5673	5.4255	6.5022	2.3596	7.5334	0	1.7028	19.89	4.2654	0	28.478	0	0	12.131	8.0277	0	35.762	5.5371	0	9.4128	10.803
0	0	20.92	0	0	0	0	4.3419	0	7.3549	4.4871	0	20.739	88.567	0	0	0	0	3.7524	13.626	3.3043	0	0	8.3554	7.8465	11.314	3.6721	8.4798	0	2.1468	16.961	6.6003	0	25.827	0	0	10.285	8.0556	0	35.586	4.9843	0	7.4815	9.2348
0	0	22.076	0	0	0	0	3.7262	0	5.5057	4.4642	0	20.021	91.601	0	0	0	0	3.358	12.486	1.9876	0	0	9.0987	9.1237	7.5207	1.7018	4.5378	0	3.5926	20.357	3.3922	0	26.165	0	0	11.424	7.0959	0	35.792	3.386	0	7.8187	10.024
0	0	19.726	0	0	0	0	5.0408	0	4.2144	4.2913	0	20.359	90.658	0	0	0	0	5.0721	12.628	1.6512	0	0	12.957	7.7014	17.303	1.6662	6.2087	0	0.50605	22.279	2.4251	0.22851	25.291	0	0	13.989	5.6324	0.66646	39.352	3.6711	0	7.1185	7.0079
0	0	19.146	0	0	0	0	2.4712	0	7.5516	5.5774	0	19.692	90.471	0	2.3902	0	0	2.6259	7.2519	2.1173	0	0	10.038	7.8794	12.918	2.469	4.0129	0	0	21.037	0.65906	0	20.587	0	0	11.696	6.2654	2.6457	41.857	3.1888	0	6.067	8.6338
0	0	18.108	0	0	0	0	2.1002	0	14.367	4.8269	0	20.657	88.153	0	0.025194	0	0	4.9185	8.7169	6.1271	0	0	12.776	6.1636	8.6364	3.0773	6.7801	0	0.9246	14.473	4.972	0	17.701	1.9804	0	14.761	6.2709	0	39.485	1.3491	0	8.0149	7.3543
0	0	17.136	0	0	0	0	3.9702	0	12.842	5.1989	0	21.008	86.966	0	0.73063	0	0	1.8186	8.8919	6.2513	0	0	10.614	8.7993	16.238	3.8444	5.1111	0	1.4369	15.143	8.3759	0	21.252	0	0	9.0271	6.9704	0	39.984	3.3297	0	5.6005	10.778
0	0	14.666	0	0	0	0	2.4985	0	12.465	3.7945	0	22.218	85.834	0	0.60114	0	0	3.9004	5.9449	5.263	0	0	11.636	8.3913	15.145	3.6612	6.4932	0	0	16.954	5.2072	0	19.039	0	0	7.7191	8.8455	0	43.538	2.5792	0	8.3097	8.4776
0	0	15.137	0	0	0	0	2.7531	0	11.465	4.3017	0	21.628	88.423	0	1.7615	0	0	3.8913	6.116	6.204	0	0	15.216	8.4728	17.827	2.4253	6.6723	0	0	18.565	5.1484	0	17.648	0	0	7.441	8.0141	0	42.643	3.2814	0	8.5125	12.136
0	0	13.941	0	0	0	0	0.59096	0	10.558	5.9174	0	21.048	86.856	0	0.28977	0	0	1.8182	8.1096	4.6816	0	0	13.436	4.6867	9.1219	1.9541	6.2721	0	2.6755	12.513	0.85664	0	16.831	0.051053	0	7.5885	7.6231	0	43.596	6.2155	0	8.5687	11.361
0	0	13.212	0	0	0	0	1.9764	0	8.7611	4.8067	0	21.177	87.528	0	3.6154	0	0	3.8367	10.397	5.3535	0	0	13.351	6.6016	11.189	4.1554	3.4042	0	3.6529	12.992	1.7404	0	20.175	0.36733	0	8.5828	8.2861	2.947	44.643	5.3646	0	5.3004	12.695
0	0	12.976	0	0	0	0	1.725	0	8.0319	5.3036	0	21.169	86.088	0	0	0	0	2.9026	8.2236	5.8192	0	0	14.329	6.5958	7.8956	2.741	8.3532	0	4.2453	12.728	4.7447	1.4125	19.631	0.85969	0	7.2004	6.9774	0	45.193	6.0623	0	6.2952	10.385
1.049	0	11.345	0	0	0	0	1.8917	0	4.8505	6.1191	0	21.278	80.635	0	2.31	0	0	2.3002	9.9442	7.0352	0	0	10.937	8.9718	17.205	3.2572	7.1263	0	7.2392	14.724	4.9231	0.15743	20.896	1.5135	0	7.8189	5.7866	0	44.605	8.9312	0	6.8479	14.868
0	0	11.402	0	0	0	0	3.047	0	5.4932	6.6905	0	20.38	78.128	0	1.3088	0	0	2.0741	8.3158	4.7011	0	0	11.554	4.2077	11.519	3.7622	5.0853	0	5.879	10.535	4.3217	0.35396	20.424	0.65906	2.062	6.7878	5.5199	0	45.148	6.8773	0	3.8469	12.651
0	0	9.8641	0	0	0	0	3.7595	0	3.8484	5.8767	0	19.608	75.724	0	0	0	0.62573	1.0422	6.1664	4.2977	0	1.7806	11.53	5.5065	14.059	3.6363	2.8822	0	4.9354	10.826	4.4471	0	20.61	0	1.6407	9.5574	6.1819	0	45.07	3.1294	0	2.9508	10.205
0.7656	0	9.4625	0	0	0	0	3.1279	0	4.1786	5.2302	0	20.421	71.028	0	0.40042	0	0	1.5656	8.0832	4.8811	0	0.99987	12.542	3.1471	8.6464	3.7914	4.4227	0	0	11.606	5.8868	0	15.856	0	0	5.6629	6.6247	0	46.263	4.8999	0	5.6176	11.774
0	0	10.355	0	0	0	0	3.8488	0	1.8724	4.805	0	19.956	66.446	0	0.49723	0	0	0.92515	8.1847	4.387	0	0	12.652	6.9798	15.403	4.0907	7.8258	0	0	11.64	5.112	0	17.167	0	0	4.2275	7.7345	0	46.252	9.1998	0	7.8438	11.449
0.4342	0	9.4917	0	0	0	0	0.89401	0	2.5258	5.0784	0	19.78	68.86	0	0.29691	0	0	0.53462	10.685	3.8424	0	3.7284	11.383	4.3744	17.127	3.6871	5.815	0	0	16.797	4.2182	0	16.935	0	0	7.0825	9.1692	0	44.404	6.9394	0	6.3039	16.116
0	0	9.2196	0	0	0	0	1.9157	0	2.7583	6.5843	0	19.705	67.821	0	0	0	0	0.59821	4.1787	4.7106	0	0	11.374	5.0545	16.406	4.8841	4.711	0	3.2563	13.971	3.857	0	17.723	0	0	3.0917	8.4877	0	45.389	8.3705	0	3.1281	14.503
0	0	7.9862	0	0	0	0	0	0.78219	1.1286	6.8121	0	18.627	67.202	0	0	0	0	3.7336	5.6449	4.3207	0	0	8.8646	4.2823	6.4684	2.3924	3.4858	0	1.9732	12.906	1.9411	0	20.46	0	0.13011	5.4605	4.9786	0	46.376	9.092	0	3.9699	12.199
0.38685	0	8.253	0	0	0	0	0.79551	0	0.43237	6.4091	0	17.856	63.823	0	0.31332	0	0.10835	3.7941	4.9916	1.7129	0	6.1042	7.9041	3.5591	7.1994	3.2035	3.85	0.9477	1.1357	10.685	1.7545	0	21.884	0	1.6759	8.3741	4.44	0	45.774	8.8843	0	2.2934	12.654
0.62409	0	8.0346	0	0	0	0	1.6451	0	1.1763	6.7468	0	18.021	60.456	0	0.24445	0	0	2.9617	6.5142	3.0276	0	5.9162	9.3569	3.9522	5.4228	3.0252	3.4237	0	0	13.076	5.636	0.74757	20.647	0	0	4.7219	6.6986	0	44.248	11.28	0	5.3245	12.68
0	0	7.1289	0	0	0	0	0.7068	0	3.362	8.0345	0	18.079	56.175	0	0.011241	0	1.7055	4.5402	7.7942	1.7558	0	2.4689	6.4978	6.8077	15.898	3.1726	6.1207	0	0	12.858	4.7629	1.429	23.876	0	0.57648	4.135	6.9325	0	44.074	8.4331	0	9.2459	10.916
0.094282	0.044007	8.2305	0	0	0	0	3.2761	0	11.32	7.0838	0	17.909	50.796	0	4.6791	0	0	6.6621	8.5583	1.422	0	2.7288	6.6697	5.8639	12.874	2.9614	5.3951	0	0	8.5178	6.4846	1.8062	27.717	0	1.8347	3.9645	4.2402	0	44.361	9.6049	0	5.2822	11.731
0.28164	0.28741	6.3415	0	0	0	0	4.0403	0	15.363	8.0049	0.56781	16.873	48.209	0	2.8106	0	2.1338	6.4591	10.436	1.5994	0	6.0223	6.7634	4.7687	11.006	3.5726	4.1744	0	0	9.7166	4.2683	1.0821	27.091	0	1.7548	3.8751	6.0113	0	41.933	8.2316	0	2.4128	15.093
0	0.47779	6.4606	0	0	0	0	2.7781	0	13.814	8.3681	0	17.406	46.567	0	2.2613	0	0	5.511	10.867	2.9815	0	7.2056	8.1092	9.1943	12.5	5.8733	5.7585	0	0	9.7114	7.2114	1.8773	26.513	0	1.7845	4.1177	4.6868	0	43.114	9.3977	0	6.3388	14.953
0	1.0984	6.1999	0	0	0	0	3.5412	0.31704	14.448	9.9507	0	16.455	43.357	0	1.7245	0	2.5593	4.2488	9.0795	3.4761	0	9.3434	7.4856	0.59604	8.6384	4.2239	5.7206	2.5261	1.9751	7.7393	1.3249	0.28492	26.75	0	2.7731	2.8627	1.7855	5.4565	43.732	9.5934	0	3.3317	13.344
0.2009	1.2226	6.0367	0	0	0	0	3.0944	0.86449	15.327	8.4766	0.83622	15.693	47.819	0	2.666	0	0	6.1723	8.5666	3.2184	0	9.319	2.9465	1.0463	2.8779	4.7437	3.8418	0	2.7102	13.239	3.0747	2.2377	24.327	0.32141	0.3107	1.6284	2.5891	1.8753	41.851	7.8385	0	4.8542	14.454
0	0.63602	5.289	0	0	0	0	3.5936	0.6936	12.508	7.443	0.67936	15.506	52.849	0	0	0	0	4.1511	10.132	2.7296	0	6.5399	6.4284	2.9043	6.0795	3.2741	6.0606	0	2.6724	15.397	4.7838	0.94823	24.75	0	0.60597	3.5851	1.7409	0.89158	40.147	8.0853	0	5.1457	15.513
0.57563	0.94011	6.7054	0	0	0.73102	0.2312	3.5436	3.9874	11.017	7.3919	0	15.202	53.595	0	3.3249	0	3.8245	2.1557	8.6102	2.5663	0	8.1961	2.2616	1.9934	8.1956	1.6029	4.7386	0	0	11.044	3.1886	1.3524	22.542	0.086382	2.0759	3.2693	4.8294	3.2198	39.833	6.8232	0	4.909	14.185
0	0.42412	4.5004	0	0	0.059221	0	1.4296	2.2695	9.8593	9.5427	0	14.471	51.35	0	2.0149	0	0	2.525	7.5377	2.2812	0	7.0014	1.2868	0.34921	10.816	3.3061	2.4684	0	0	10.29	0	2.2518	21.63	3.157	2.4457	5.1978	4.5961	0	39.276	7.2378	0	6.1286	15.435
0	0.5055	4.0294	0	0	0.51892	0	3.7204	2.8444	11.564	7.4703	0	14.335	51.173	0	0	0	0	3.6952	10.134	3.8694	0	12.466	2.747	2.2409	13.233	3.4295	4.9403	0	4.3819	9.1175	4.7949	0	16.258	0.023689	3.5896	3.1419	3.0191	0	38.2	7.1696	0	8.8899	13.774
0	0	4.9752	0	0	0	0	2.0297	0.61729	11.025	7.6997	0	14.716	50.708	0	4.297	0	0	3.8716	12.598	4.9959	0	12.717	1.1501	4.384	11.82	2.8987	5.1806	0.059788	3.4765	6.2537	4.4266	3.1071	19.726	0.52547	3.3112	7.3463	6.0382	0	39.348	8.753	0	6.9214	15.313
0	0	4.6402	0	0	1.5281	0	1.2435	1.1551	9.5904	7.3153	0	13.823	59.9	0	0.97127	0	3.518	3.6065	12.097	4.1806	0	8.2385	1.0592	5.2295	14.746	3.9051	4.5372	0	6.8766	4.8008	4.9952	1.8303	18.594	0.072904	3.885	5.3412	7.4065	0	37.075	7.6125	0	8.4928	20.705
0	0.23135	4.2984	0	0	1.3978	0	1.7775	0.88356	8.5622	5.8806	0	13.117	59.592	0	1.2268	0	0	3.5093	11.202	5.5048	0	11.12	0.43276	4.2054	15.804	5.3384	8.6584	0	0.95547	4.5921	1.5839	3.6554	23.67	1.4777	1.5618	4.4815	7.005	0.92317	35.713	8.0064	0	6.4536	21.973
0.077701	0	4.4307	0	0	0	0	2.7746	0	6.8757	5.2213	0	13.341	57.536	0	1.4878	0	0	4.5279	14.422	5.628	0	7.207	1.3561	5.5225	12.484	4.9887	4.9659	0	6.1856	6.1914	5.1749	1.2668	17.178	1.2244	4.5222	6.1881	7.1869	1.2325	34.823	5.0188	0	9.8781	21.694
0	0	4.9776	0	0	0	0.27902	1.9817	0.48536	5.8757	6.8086	0	13.22	55.349	0	1.7694	0	0	3.8281	14.058	4.4258	0	10.06	0.48632	6.0456	16.569	4.8068	3.6926	0	3.4043	10.201	2.3673	4.1906	19.969	0	3.332	8.0024	9.7047	7.5328	35.408	8.6867	0	8.2978	19.101
0.27264	0.01809	5.9375	0	0	0	0	0.48353	0.012696	5.5574	5.3992	0	12.965	52.372	0	4.6092	0	2.1728	4.0424	15.33	5.4121	0	7.4414	1.071	6.2152	7.2157	6.037	6.0469	0	0	10.968	4.4229	1.6729	16.968	0.50295	2.0256	4.5471	5.6968	0.70003	34.513	8.8234	4.9497	7.1825	21.169
0	0	4.275	0	0	0	0	1.2262	0.25053	5.3907	5.5178	0	12.528	51.597	0	2.8194	0	1.1418	1.4772	14.896	7.2269	0	8.4415	0.43585	7.3857	12.432	5.9741	5.7801	0	0.16676	8.5213	6.1388	3.2491	17.541	0.8302	0	4.3049	9.4215	0	34.858	9.2517	3.0611	9.6387	20.799
0.62258	0.17551	2.8994	0	0	0	0.26936	1.6802	0	16.601	5.4945	0	12.385	51.129	0	0.082791	0	0.60015	3.1633	16.208	7.3531	0	11.825	0	6.3528	6.1675	7.1556	7.7104	0.32122	1.8855	5.7333	4.2603	2.2369	17.198	2.3471	0.22433	5.5109	9.226	3.5639	32.955	8.1275	0.83448	8.54	19.471
0	0.22229	4.0965	0	0	0	0	0.54973	0	21.805	4.9663	0	11.683	56.408	0	0	0	0.0078707	2.6338	13.387	7.5717	0	11.431	2.2175	5.1871	6.7005	6.4032	4.9746	0	5.4317	4.2962	4.1891	3.4652	15.284	2.3808	3.2537	5.9065	5.0325	5.2114	35.895	4.6382	0.34539	9.3225	15.98
0.56974	0	4.8711	0	0	0	0	2.6773	0	20.104	3.4425	0	12.407	60.172	0	0	0	0	1.3692	12.355	8.3403	0	8.2897	3.5235	6.2734	6.2748	4.0463	4.6693	0	3.27	9.987	3.5849	0.58956	11.24	2.7441	0.82608	4.0892	6.7872	5.8742	35.007	6.5171	0	11.334	11.671
0	0	4.8238	0	0	0	0	1.6167	0	19.592	4.7918	0	11.987	60.286	0	0.59361	0	0	3.0893	12.635	6.5375	0	4.2199	0	7.599	2.1081	4.7752	5.1438	0	5.7568	5.9213	5.9467	0	15.385	1.3563	0	6.7502	6.7295	1.0589	34.16	10.959	0	10.25	12.979
0.42107	0	3.9993	0	0	0	0	1.9804	0	16.751	5.2114	0	11.973	59.497	0	3.4585	0	0	3.6604	13.559	7.4155	0	5.1792	1.7343	6.5456	5.5548	4.3356	6.6263	0	1.2952	6.163	4.6985	0	16.184	1.2119	0	1.8622	6.1787	4.5832	33.431	12.316	0	10.61	14.314
0	0	4.8119	0	0	0	0	0.7863	0	25.851	6.4422	0	12.368	57.324	0	1.3808	0	0	3.1087	10.299	6.6968	0	6.3955	3.2618	7.9007	4.1983	3.938	8.7913	0	0	8.0339	3.6221	3.3606	19.137	0	0	4.0253	5.3918	0.73854	34.304	6.8753	0	7.2793	11.927
0	0	4.304	0	0	0	0	1.3548	0.27781	30.067	5.2385	0	11.88	60.663	0	4.8598	0	0	0.71268	12.832	5.1601	0	3.8906	3.4342	7.8705	1.8458	4.9959	5.1903	0	0	7.6625	3.7383	0	18.769	0.76064	0	2.5397	5.9289	0.04374	34.145	6.3343	0	8.3565	11.534
0.020226	0	5.041	0	0	0	0	4.0663	0	32.625	3.7205	0	11.947	58.776	0	2.681	0	0	1.3383	11.325	4.4352	0	4.1739	3.2081	7.7736	6.0527	4.9066	4.831	0	0	8.2378	0.40925	3.108	15.793	0.23353	0	3.1697	3.85	0	34.953	8.6479	0	9.549	12.156
0	0	4.7045	0	0	0	0	2.276	0	31.915	4.7443	0	11.518	54.604	0	2.4362	0	0	2.1028	12.087	4.2203	0	5.5226	1.9778	5.175	11.955	3.3278	7.4595	0	3.6337	6.7555	6.4029	0	20.405	0	0	1.4843	5.9006	0	35.07	9.4824	0	9.5334	11.182
0	0	5.2196	0	0	0	0	2.8278	1.2446	30.578	4.1409	0	11.14	51.61	0	0.66543	0	0	3.347	12.463	3.185	0	4.0144	2.4353	6.4102	18.854	3.3306	5.4828	0	6.6375	6.5754	3.9976	1.9668	20.813	0	1.249	3.9622	6.1496	2.794	35.632	9.7754	0	7.8608	11.767
0	0	3.2336	0	0	0	1.1871	0.42019	0	29.748	5.7884	0	10.22	51.156	0	2.0473	0	0	3.0825	11.738	3.3034	0	8.5309	2.3093	6.8694	23.869	3.8195	5.492	0	6.1601	4.5219	2.0136	0	18.793	0.26681	0	4.1254	6.4125	1.5693	34.345	7.6575	0	7.6628	9.6831
0	0	3.8481	0	0	0	0.24216	3.0718	0.99148	30.799	5.2899	0	10.532	45.406	0	3.1128	0	0	3.1692	3.9084	3.4801	0	11.226	0	7.7714	19.829	2.6216	6.3317	0	0	8.8084	3.4303	0	18.1	0.90229	0	2.7197	7.2906	3.3657	32.656	7.0417	0	5.5569	10.174
0.040361	0	4.025	0	0	0	0	2.6204	0	32.597	3.4104	0	10.313	44.075	0	3.2789	0	0	1.9597	8.297	4.0996	0	10.818	0	8.2124	29.98	3.0524	4.5541	0	0	11.633	3.9192	2.2215	21.31	0	0	1.4267	9.4156	0	31.751	5.886	0	7.262	9.1224
0	0	2.276	0	0	0	0	4.2671	0	35.157	4.7649	0	10.558	40.982	0	2.1903	0	0	4.2514	9.2061	2.1068	0	7.7995	0.77002	6.8864	26.818	2.6839	7.915	0	3.3098	8.733	3.0183	0	22.961	0	0	3.9449	9.2863	4.3286	32.081	5.1498	0	11.077	7.9868
0.2908	0	3.8827	0	0	0	1.1987	2.4528	0	38.36	3.7787	0	9.5993	38.402	0	6.162	0	0	5.5798	9.5882	3.5041	0	10.39	0	7.1369	28.355	2.5081	6.4711	0	3.4547	10.71	5.0505	0	25.079	0.67009	0	4.021	10.449	4.3133	31.625	5.9161	0	6.2307	8.9205
0	0	3.3565	0	0	0	0.90216	6.0886	1.6422	34.834	3.3823	0	9.7617	33.91	0	3.2571	0	0	6.028	8.5118	2.3646	0	14.119	0	6.6263	24.044	1.9668	4.531	0	0	6.5664	0.52008	0.26017	23.667	2.3729	0.13516	1.7555	9.1989	11.313	30.327	1.4622	0	10.326	8.3257
0.15679	0.30091	2.9588	0	0	0	1.6406	4.8966	0.93444	37.178	5.569	0	9.1925	31.201	0	0.87982	0	0	5.5139	10.078	5.6727	0	12.613	0	8.8471	22.938	3.247	4.7262	0	2.2837	9.8593	2.2216	0	26.069	2.6904	0.031294	7.9737	11.679	16.327	28.902	4.1886	0	8.4904	6.6684
0	0	2.6751	0	0	0	0.99903	5.293	1.4166	37.381	4.4069	0	9.5872	31.595	0	1.1225	0	0	6.7622	8.3069	5.4603	0	18.513	0	6.1605	23.311	2.5157	4.9258	0	0	9.6602	6.0284	0	32.196	1.2714	0	4.1626	12.287	10.518	28.338	2.5032	0	12.014	7.1795
0	0	2.9436	0	0	0	1.9974	5.9722	1.0169	45.303	5.4618	0	9.3911	27.057	0	3.7279	0	1.4075	7.6056	8.5911	5.1913	0	18.202	0	8.0692	17.05	3.642	4.1609	0	0	11.021	2.6445	0	37.438	1.0506	0	5.637	10.868	14.66	26.81	2.8519	0	8.9905	7.3004
0	0.03547	3.818	0	0	0	1.5427	9.6575	0	47.614	5.4056	0	9.1901	26.853	0	2.0955	0	0	8.7771	10.519	5.8346	0	16.438	0.6742	12.508	12.622	3.4991	2.6962	0	2.0085	11.893	3.1711	0	35.995	2.1114	0	9.3654	13.103	15.187	27.002	3.8895	0	14.177	6.1892
0.2192	0	3.7567	0	0	0.84685	1.0592	11.312	0.73239	55.216	5.6797	0.020529	8.8982	25.918	0.57333	2.4236	0	0	6.9166	9.64	3.8459	0	17.613	0	10.558	13.739	5.9818	5.2807	0	2.4458	10.156	2.6119	1.1187	38.802	3.3174	1.299	5.4617	9.5338	17.463	25.636	3.0018	0	10.115	5.8209
0.82196	0	3.9183	0	0	1.4454	4.7327	12.373	2.0056	65.77	5.857	2.2969	8.4148	27.252	0	2.4457	0	0	4.9339	12.267	3.3122	0	17.683	1.3141	12.987	11.998	6.2184	5.6991	0.35965	5.7645	9.3998	6.615	0	38.048	1.0519	1.3387	10.311	10.571	18.767	26.217	6.7074	0	14.295	8.6699
0.68932	0	5.4624	0	0.38721	1.9526	1.0763	13.161	3.5109	76.915	9.872	3.2864	8.0208	29.175	1.3651	4.1084	0	0	7.2915	11.883	2.2443	0	15.03	0.97862	10.592	13.593	6.0902	7.848	2.9903	2.3441	12.046	4.0665	0.43255	38.734	0.28234	5.3774	6.1475	11.5	23.836	23.728	3.1488	0	13.751	5.5481
0.17162	0	5.0501	0	0	0.95517	2.098	14.023	0.84035	80.522	10.151	2.6594	7.8	35.706	0	3.5334	0	0	6.8866	12.859	2.8535	0	18.267	0	14.569	10.597	7.1603	7.0566	0	0	10.566	8.019	0.0039718	34.545	2.1242	0	6.2233	10.442	23.046	26.038	6.1417	0	12.263	5.5602
0	0	4.355	0	0	3.2145	2.8106	12.949	1.7263	83.121	8.0925	3.257	7.8932	56.986	2.0247	0	0	0	5.8183	10.154	4.2371	0	19.952	0.87703	13.293	7.5153	7.2127	6.75	0	0	11.919	7.4258	0	35.054	0.15193	0	9.1101	9.808	23.201	25.794	4.7508	0	12.258	6.3189
0.42361	0.11138	5.2511	0	0	4.5319	1.1678	10.829	0.26044	80.073	9.7246	0.1939	7.2151	73.333	1.4552	0	0	0	8.7387	14.735	5.3198	0	17.731	0.92372	14.455	2.9024	7.8257	6.8794	0	3.6	14.711	6.2882	0	34.798	0.17828	0	10.642	10.698	20.971	22.845	4.296	0	15.545	5.7472
0	0	3.9994	0	0	15.917	2.1274	6.78	0.89177	74.035	5.7861	2.0772	6.5689	83.231	2.134	0	0	0	6.1778	30.725	4.4926	0	15.953	0.20216	13.847	3.2222	5.2012	8.2882	0	7.9267	20.062	9.2017	0	31.801	2.0849	0	13.215	10.402	20.073	23.426	4.3734	0	14.001	6.9982
0.15822	0	4.9393	0	0	17.628	3.7906	5.4423	1.5485	68.913	4.9519	0.37527	6.6202	89.62	4.4574	0.91752	0	0	7.1936	45.882	5.1085	0	11.887	0	14.753	1.7517	4.8047	8.9574	0	1.8402	16.852	7.4007	0	31.426	0.55546	0	13.43	13.479	17.251	22.83	1.3671	0	13.48	10.03
0	0	3.5797	0	0	20.413	0.53724	4.419	0	66.548	7.102	0.44607	6.1376	90.696	2.6078	1.9273	0	0	6.496	47.524	5.4814	0	12.142	0	14.01	5.0452	3.1439	7.2307	0	7.0463	18.608	6.1465	0	28.038	0.19135	0	12.418	15.11	18.704	19.21	3.0777	0	14.283	8.2792
0	0	3.1757	0	0	23.342	0	7.3098	1.7849	62.353	5.9074	2.7629	5.627	88.512	2.4009	0.89974	0	0	6.2344	48.99	3.8667	0	9.0107	0.12242	11.343	3.0844	2.2894	9.8191	0	6.7328	17.074	6.3563	0	27.461	1.141	0	11.579	11.287	12.555	19.444	2.4321	0	12.308	7.6628
0	0	3.3275	0	1.1572	22.918	0.62151	5.1816	2.9709	62.94	4.7942	0.98472	6.0869	88.47	1.081	4.6835	0	0	5.1256	46.709	3.602	0	7.5967	0	10.497	3.3287	1.9647	8.2281	0	2.1109	14.176	6.5207	0	26.21	0.39764	0	8.6787	9.687	10.971	17.833	4.7755	0	11.499	6.7041
0	0	3.4313	0	2.6229	21.769	0	4.6554	0.45447	57.962	5.9579	0	5.7438	85.718	1.1375	0.91287	0	0	4.7917	43.211	2.3911	0	6.6226	0.28599	12.112	5.7691	2.007	6.6604	0	1.2401	14.32	7.6627	0	28.503	0	0	11.737	11.916	13.743	16.914	2.0396	0	11.906	6.4399
0	0	3.0631	0	0.8284	17.592	2.6842	4.1075	0.90778	57.613	6.4381	0.35385	5.4824	82.924	0.30624	1.4405	0	0	5.3334	44.322	3.24	0	6.2265	1.4692	12.463	8.5037	1.3797	12.392	0	0	19.965	6.5695	0	29.826	0	0	9.83	11.812	15.214	16.947	5.4799	0	10.008	4.876
0	0	2.9211	0	0	16.286	2.4695	5.7403	1.7358	55.456	8.041	0	5.9868	80.13	0.94196	0	0	0	7.3779	40.899	3.7484	0	10.216	0	15.284	3.5985	1.8851	7.7093	0	5.6153	14.948	2.1979	0	28.302	0	0	9.5772	10.739	14.587	16.594	1.4124	0	10.056	7.0544
0	0	2.5325	0	1.8449	14.545	0.33034	5.4239	0	55.716	9.5656	0	5.4454	78.585	0	0.44563	0	0	2.9891	36.298	3.1473	0	10.932	0.75742	12.718	4.7301	2.865	10.151	0	1.7263	15.32	6.9837	0	26.264	0	0	9.5675	10.403	11.448	16.681	4.8659	0	10.681	6.4032
0	0	2.5208	0	0	13.904	3.2992	4.6856	0	52.655	8.6244	0.18274	5.1186	78.929	0	0	0	1.7474	4.2012	34.536	3.4688	0	13.369	0	10.658	4.7665	2.2706	9.8617	0	4.5609	19.755	3.0001	0	25.678	0	0	6.498	8.2871	13.069	15.762	3.793	0	8.6017	6.8888
0	0	3.1091	0	0.1549	12.493	0	7.0849	0.10901	49.781	8.0854	0	5.3917	75.88	0	0.62258	0	1.2386	5.849	34.4	3.3354	0	12.517	0	12.72	4.3333	3.368	7.8314	0	1.0078	18.709	1.1592	0	25.57	0	0	7.6821	10.784	11.362	15.28	5.1649	0	15.865	9.1378
0.62752	0	3.8636	0	1.4365	10.362	0	9.8553	0.96967	54.045	10.208	0.44917	5.6359	71.329	0	2.2078	0	1.5281	3.8531	28.109	3.1104	0	16.644	1.0716	12.108	3.2313	4.4933	11.828	0	4.3623	21.095	4.4643	0	28.358	0	0	8.6958	11.826	10.707	16.603	3.5071	0	18.523	9.0665
0	0	3.0023	0	1.6365	8.8146	3.1389	7.0492	0	56.452	8.4889	0.44504	4.5746	70.471	1.2435	0	0	0	3.9482	28.606	3.738	0	18.44	0	10.679	5.7427	4.8779	9.7829	0	3.1403	15.135	3.3545	2.4312	27.85	0	0	7.6764	11.373	16.998	16.195	5.2556	0	18.355	8.5117
0	0	3.5779	0	2.5452	6.3478	0	6.6644	1.2436	55.685	9.0883	1.2791	5.6156	70.881	0	0	0	0	5.3816	27.403	4.3139	0	19.442	0.76713	12.847	0	3.61	8.273	0	7.3364	17.257	5.4202	0	22.185	0.52945	0	8.7866	9.6927	9.5388	18.059	7.1618	0	17.17	7.5929
0.13806	0	2.5338	0	4.9427	4.8632	2.6354	8.0285	0	53.181	9.7349	0	5.1845	68.023	0	0	0	0	3.0444	25.67	5.079	0	17.551	0.072294	12.6	4.3325	2.9246	8.7519	0	4.1019	17.018	4.7074	3.3213	24.694	0	0	7.3122	11.036	11.023	16.847	4.4243	0	23.243	9.3898
0.13484	0	3.7178	0	4.039	3.534	0.40185	7.7411	0	49.147	8.577	0	5.2476	64.438	0	0	0.014701	0	7.7641	22.427	6.576	0	11.495	1.9796	16.124	12.297	4.1798	7.927	0	0.10386	17.442	1.8118	1.1369	26.674	0	0	4.7746	10.389	6.1659	15.408	5.7761	0	18.215	7.6128
0	0	2.8053	0	4.9379	4.6216	0	6.606	0	58.868	8.3744	0	4.8897	61.496	0	0	0	0	5.4963	23.309	5.445	0	14.771	4.9145	14.26	4.7025	2.379	9.7705	0	0	12.463	6.6837	0	26.911	0	0	4.3187	12.664	8.701	13.615	5.8552	0	17.726	8.7998
0.20964	0	4.0079	0	4.0506	1.5497	0.61168	8.3667	0	64.251	6.4892	0	4.626	58.543	0	0	0	0	3.2107	18.773	5.5201	0	10.798	2.8725	12.767	9.3341	1.9804	9.0157	0	4.4412	9.0874	0.64541	1.9844	24.232	0	0	4.1209	12.888	2.0917	12.014	6.383	0	17.858	7.0971
0	0	3.1056	0	3.6186	0	0	10.653	0	63.61	7.5828	0	4.0853	54.982	0	0	0	0	4.8751	17.221	6.4954	0	10.958	1.8135	15.158	6.3854	3.3016	10.015	0	2.3052	12.859	5.5721	0	23.559	0	0	1.4398	11.877	7.7584	11.171	3.4157	0	15.862	6.3191
0	0	2.9797	0	3.7277	0	2.0662	8.3041	0	58.182	6.3986	0	3.7756	49.812	0	0	0.30073	0	2.9277	18.504	6.9023	0	11.408	1.9018	16.632	7.1291	2.0442	9.69	0	2.8528	10.187	3.67	0	20.842	0	0	2.0382	11.816	2.9607	10.409	6.0304	0	14.56	6.3065
0	0	2.4548	0	4.1376	0	0	8.7268	0	54.406	6.8856	0	4.326	47.584	0	0	0.63073	0	4.3467	16.514	5.7485	0	5.3793	2.3401	12.771	4.6159	2.8291	8.1713	0	0	11.102	4.4256	0	22.493	0	0	1.7509	12.785	1.3345	10.925	4.3459	0	6.8862	6.8945
0	0	2.0478	0	4.1299	0	0	7.7678	0	51.232	3.346	0	3.6294	45.079	0	0	0.03729	0	3.8243	15.658	7.1183	0	4.7699	1.0565	16.765	7.5672	2.3501	7.7077	0	0	15.539	4.3813	0	19.855	0	0	1.8095	11.143	0	7.8801	4.283	0	13.214	12.999
0	0	0.97367	0	1.8706	1.1977	0.1417	6.0614	0	43.83	5.4931	0	3.9984	43.368	0	0	0	0	2.8311	17.028	6.9247	0	7.5062	2.3386	12.465	10.65	0	8.408	0	0	13.19	5.2971	0	17.726	0	0	0.44065	12.954	0	8.2339	3.4091	0	8.1086	9.5923
0	0	1.236	0	2.1644	0	1.2619	4.2906	0	40.433	4.5962	0	3.1387	40.936	0	0	0	0	1.8546	16.022	5.7029	0	4.2704	1.9427	14.444	8.9309	1.6889	3.7845	0	1.3182	11.454	4.2105	0	18.206	0	0	0	12.187	0	7.1281	2.7316	0	4.3853	11.04
0	0	1.4376	0	1.7381	0	0	5.2296	0	38.021	3.5489	0	2.9176	38.294	0	0	0.68013	0	3.2196	17.046	7.1023	0	7.2915	0.9948	12.583	11.015	0.96886	6.3821	0	0	8.171	1.3348	0	17.673	0	0	0.22255	11.728	0.21327	6.0814	3.5464	0	4.868	12.879
0	0	0	0	1.8018	0	0	4.3847	0	34.742	3.0955	0	3.3078	37.186	0	0	0	0	1.7307	12.916	6.6094	0	4.1444	2.2711	13.809	6.8844	2.1782	8.0865	0	1.2077	17.332	0	0	16.688	0	0	0	13.076	1.7957	4.1045	2.3535	0	9.5858	14.126
0	0	0	0	2.8165	0	0.38343	4.3847	0	30.952	2.6184	0	2.674	33.752	0	0	0	0.12507	3.3759	12.863	6.8704	0	1.8166	0.38168	13.926	11.01	2.1848	3.6956	0	0	7.0591	0.7716	0.63575	17.05	0	0	0	11.644	2.5945	4.8542	0	0	5.6714	16.996
0	0	0.1596	0	0.89222	0	0	2.7655	0	27.195	3.4908	0	2.3684	31.251	0	0	0	0	0	11.557	5.1102	0	0.7981	2.6064	14.514	15.791	1.5481	8.1545	0	0	16.365	0	0.85538	15.297	0	0	0	10.424	0	5.4189	1.7183	0	5.9596	13.968
0	0	0.75588	0	1.3822	0	0	4.18	0	25.136	3.4404	0	2.4636	28.017	0	0	0	0	1.0743	14.518	4.8176	0	0	0.56311	10.767	16.427	2.102	3.9423	0	0	7.0092	0	2.0846	14.681	0	0	0	10.594	0	5.1362	3.4245	0	2.3651	11.856
0	0	0.63682	0	1.4204	0	0	4.2433	0	25.064	3.377	0	2.0741	27.733	0	0	0.31728	0	2.1512	17.494	5.0131	0	3.1771	0	9.101	10.583	1.6131	6.2337	0	0	5.3486	1.6363	0	14.753	0	0	0	9.4851	0	2.3354	2.9626	0	8.6499	11.375
0	0	0.61149	0	2.3037	0	0	3.9645	0	29.233	2.2166	0	2.2521	24.859	0	0	0.0079721	0	1.0292	13.579	9.0086	0	2.4031	0	12.177	12.265	2.4884	3.7489	0	0	6.0714	8.0057	0	13.425	0	0	0	8.6323	0	3.1149	3.4198	0	7.6135	13.981
0	0	0.28387	0	2.9428	0	0	3.2812	0	27.171	3.1501	0	2.1269	23.486	0	0	0	0	0	9.5066	8.2726	0	0.69505	0.73364	13.967	21.812	1.6806	2.8929	0	0	6.2498	3.7216	0	14.491	0	0	0	8.9904	0	1.4947	4.1701	0	7.1719	9.9728
0	0	0.97824	0	2.2341	0	0	2.9451	0	25.522	2.6126	0	1.7264	21.246	0	0	0	0	0	14.76	8.8661	0	3.3543	0	11.866	26.086	2.0114	6.0939	0	2.662	7.7502	2.5623	0	10.372	0	0	0	9.4507	0	2.6193	3.1118	0	7.9474	12.72
0	0	0	0	2.9279	0	0	3.0118	0	29.035	4.0912	0	1.7192	20.541	0	0.47832	0.82404	0	1.0103	10.798	9.2094	0	1.2134	1.4539	10.511	33.577	2.6656	5.0294	0	0	12.775	3.4459	0	12.297	0	0	0	7.9026	0	3.0352	2.4545	0	4.6921	14.649
0	0	0	0	2.7306	0	0	2.3873	0	30.786	3.8387	0	1.2126	19.069	0	0	2.2886	0	0.92277	12.304	13.494	0	0.2845	0.090983	12.676	36.057	4.4759	5.0878	0	2.046	14.42	4.348	0	11.178	0.95294	0	0	6.9133	0	2.3256	4.6211	0	3.2423	18.24
0.18271	0	0.11537	0	2.4867	0	0	3.4129	0	34.788	2.8103	0	1.6235	18.867	0	0.9512	0.75328	0	2.5694	15.165	12.917	0	0.16124	2.9572	12.665	28.334	3.8915	5.203	0	1.7467	16.134	3.5025	2.7504	11.509	0	0	0	5.6327	0	2.0647	1.8403	0	3.8945	12.969
0	0	0	0	3.0464	0	1.1067	2.6636	0	45.522	3.5324	0	1.4251	18.213	0	0.66945	1.8021	0	1.6399	10.756	11.849	0	0	2.7973	10.225	26.779	3.7616	8.9611	0	0	15.5	7.145	2.3265	11.022	0	0	0	8.2512	0	0.24709	1.2053	0	6.5524	11.371
0	0	0	0	2.9027	0	0	3.7283	0	47.186	4.7032	0	1.1662	15.297	0	0	0	0	1.5846	10.863	9.637	0	0	3.476	12.601	23.567	2.8304	5.8042	0	0	15.91	3.0476	4.1486	11.888	0	0	0	6.4157	0	1.0346	1.9004	0	0.33239	15.472
0.068824	0	0	0	3.0295	0	0	4.2446	0	47.411	4.3911	0	1.0841	16.423	0	1.9422	0.81396	0	1.1251	10.051	9.7019	0	0	1.8266	10.664	27.4	2.2151	7.6105	0	0	19.902	4.528	2.0809	13.388	0	0	0	7.608	0	1.0771	0.26699	0	4.1475	11.305
0	0	0	0	2.9563	0.015486	2.4007	4.9179	0	59.857	3.9603	0	1.4032	12.92	0	0.33223	0.21124	0	2.5511	12.944	8.096	0	0	0.79771	11.132	20.978	3.5441	5.2656	0	1.4551	16.159	2.6696	5.5047	13.115	0	0	0	8.704	0	0.69151	3.7266	0	2.9132	9.6379
0	0	0	0	2.2864	0	2.813	2.8772	0	64.925	3.6288	0	1.3878	13.421	0	2.2719	0	0	1.9243	11.262	5.8899	0	0	2.5526	9.8835	16.914	1.4199	7.6517	0	3.4884	21.457	0	12.013	13.667	0	0	0	7.3538	4.1222	2.0776	0.20311	0	7.9324	7.0491
0	0	0	0	1.6981	2.1981	3.3779	3.3968	0	61.837	2.5924	0	0.52051	13.93	0	1.7981	0	0	1.6605	14.778	4.9424	0	2.322	3.1841	7.7976	13.739	0	5.8227	0	3.2141	20.434	3.3049	10.845	11.19	0	0	0	7.0428	13.03	0	0	0	4.442	4.6984
0	0	0	0	2.3972	0.37966	6.6498	3.2721	0	60.106	3.6935	0	1.052	11.662	0	1.8851	0	0	3.0407	13.61	4.4499	0	1.4823	4.0043	8.8241	14.189	2.0033	7.023	0	3.5242	17.784	0.1961	17.32	14.306	0	0	0	6.4489	9.4106	0	0	0	5.9722	8.3508
0.037981	0	0	0	2.6932	2.618	5.32	2.2812	0	57.441	4.2838	0	0.60233	10.809	0	2.1954	0	0	3.8612	9.5102	4.3971	0	3.6873	3.4229	10.678	14.79	0.026067	6.4311	0	4.0942	19.458	2.406	20.513	11.219	0	0	0	6.4611	3.9296	1.9785	0.79504	0	4.4825	6.9235
0	0	0	0	3.3322	2.2706	3.3843	4.3135	0	67.509	4.2454	0	0.43266	10.031	0	1.5336	0	0	4.9819	11.43	3.2471	0	1.1594	1.7933	11.062	11.597	0	7.0973	0	4.4823	14.847	1.8715	16.365	11.148	0	0	0	7.217	1.7022	1.1349	0	0	0	7.2176
0.012081	0	0	0	1.8004	1.3614	0.4137	4.5006	0	65.727	3.3312	1.1596	0.76015	9.536	0	1.5217	0	0	3.9597	16.011	1.4038	0	7.6317	2.3107	7.2832	2.4163	0	4.8521	0	1.763	17.224	3.8241	17.941	10.128	0.1648	0	0	4.7675	0	0.54451	0	0	0.21856	6.4587
0	0	0.088797	0	0.93221	1.2725	3.673	2.1199	0	63.468	2.4321	0	0.63378	8.816	0	1.4189	0	0	1.8213	10.814	0.10387	0	10.907	2.0875	7.1254	9.3489	0	4.5103	0	3.4341	16.442	0	12.115	11.072	0	0	0	1.4676	0	0.47638	0	0	0	1.9745
0	0	0	0	1.8827	4.2929	4.226	4.0225	0	58.09	5.9084	0	0.19253	8.0809	0	1.3062	0	0	1.9733	13.538	0	0	16.81	2.6146	6.3501	7.5598	0	3.5983	0	0.58017	20.756	0	12.091	8.5049	1.7383	0	0	1.5868	0	0	0	0	0	6.6608
0.058848	0	0	0	0.96085	3.6893	5.5633	4.0883	1.0227	54.924	5.0516	0	0.35285	7.3772	0	2.7633	0	0	2.6469	16.562	0.35948	0	26.059	2.9355	5.9377	3.8067	0	4.7611	0	0	23.22	0	12.691	10.589	2.5846	0	0	1.126	0	0	0	0	0.62698	7.2219
0	0	0.36975	0	0	7.5121	2.7885	5.1844	2.2063	51.661	4.7544	0	0.6866	6.2142	0	0.16594	0	0	1.9001	18.835	0	0	21	0	4.6137	0	0	2.4117	0	0.99398	23.66	0	13.218	10.329	4.7145	0	0	2.8688	0	0.23272	0.33562	0	0.47455	2.5309
0	0	0	0	1.2948	8.7507	4.288	3.956	2.706	46.203	3.9261	0	0.29302	6.8299	0	0.6509	0	0	3.4006	16.623	0	0	19.818	0	4.3917	0	0	3.4581	0	0	21.471	0	8.2833	9.8914	1.073	0	0.049587	2.0076	0	0	0	0	0	3.6871
0.10509	0	0	0	0.79727	5.7395	3.9197	0.90082	2.0703	43.39	5.2509	0	0.6134	6.2953	0	2.1288	0	0	0.50973	14.151	0	0	16.976	2.1469	5.6811	3.7208	0	3.6847	0	3.5213	22.466	0	7.1649	8.3563	0	0	0	2.9049	0	1.0933	1.469	0	2.1926	4.8695
0	0	0	0	0	5.1489	3.0643	4.0071	1.1272	40.738	5.9004	0	0.40365	5.7521	0	2.3931	0	0	0.49382	16.3	0	0	14.271	2.9058	4.3502	0	0	5.6116	0	2.2705	26.122	0	6.0012	10.358	0	0	0	1.6617	0.58451	0	1.4842	0	15.605	8.4516
0.11416	0	0.31159	0	1.3515	7.0172	2.6524	4.1507	0.29726	35.219	4.9546	0	0.046602	5.1355	0	4.7674	0.72173	0	0.36395	9.7012	0	0	11.614	2.033	4.019	0	0	7.5983	0.097597	1.5134	24.922	0	7.537	5.3378	0	0	0	2.1935	0	0.1984	2.6094	0	18.366	8.3206
0	0	0	0	0	9.0757	3.0913	4.795	0.28269	33.875	4.0112	0	0.75621	6.6676	0	2.0916	0	0	0.96761	14.523	1.9247	0	10.838	0.32586	6.5559	3.3536	0	3.8619	0	0	26.625	0.26857	11.871	5.671	3.3006	0	0	2.2389	0	1.3734	5.7735	0	18.142	6.5631
0	0	0	0	0.17031	4.0453	3.2608	4.2081	1.2136	32.546	5.9686	0	0.86084	5.008	0	1.7329	0.89416	0	0	12.901	6.1153	0	6.566	0.24584	4.2696	0	0	7.4247	0.4803	3.8812	26.583	2.6162	8.8781	6.0526	3.6467	0	0	2.4562	0.92317	1.6893	0.69218	0	20.703	8.8362
0	0	0	0	0.80737	8.8602	2.2235	4.6408	0	40.362	4.4825	0	0.91507	4.1629	0	4.4551	0	0	0.30912	9.2409	8.2786	0	5.3619	4.0742	0.57867	0	0	4.7859	0	0.97549	21.465	2.6193	8.463	6.4104	7.833	0	0	0.83955	4.2828	0.79207	0	0	17.882	7.1857
0	0	0	0	0.56627	6.6859	1.6392	2.9372	1.7024	44.815	3.5509	0	1.3751	5.1055	0	1.5204	0.22992	0	1.5904	9.5243	8.6435	0	4.32	3.5496	3.5356	1.4829	0	5.1144	0	4.9026	22.538	3.8841	3.9504	6.097	9.6378	0	0	0.93537	2.5206	3.0378	0	0	12.209	7.5283
0	0	0	0	0.89047	5.0247	2.4912	4.3035	1.3127	41.528	3.228	0	1.7847	3.1886	0	5.0013	0	0	0.94919	8.9603	9.3715	0	3.1859	2.6148	3.7969	2.5526	0.24572	6.8843	3.305	1.264	17.694	2.5604	6.2197	5.786	8.1665	0	0	1.2486	5.0796	3.14	0	0	18.939	8.1571
0	0	0	0	0	3.2803	1.6009	5.6374	0	40.791	3.4298	0	1.8076	3.6219	0	4.5583	0	0	0	7.6407	10.627	0	4.4188	2.0376	4.1111	0	0	5.9483	0	0	22.321	2.8483	1.7922	4.9757	8.7094	0	0	2.8375	3.2458	3.0723	0	0	17.847	9.4431
0	0	0	0	0.72362	2.4897	1.3354	2.2853	0.042608	37.412	2.5506	0	1.3339	2.5541	0	1.3407	0.1194	0	2.9214	9.0705	9.3115	0	8.5553	2.5894	4.0518	7.5231	0	9.0103	2.3718	0	18.007	0	6.651	5.0037	6.2634	0	0.72605	0.9862	3.5685	4.5693	0	0	19.982	8.1544
0.76744	0.11368	0	0	1.958	1.7581	1.2762	4.8481	0	36.168	2.5172	0	1.748	0.90923	0	0.17986	2.0979	0	0.5547	7.8255	10.608	0	4.8202	2.6751	7.8164	1.3069	0	9.35	0	2.3246	15.004	3.1916	4.2481	6.9897	5.8447	0	0	1.3007	0.13527	3.1035	0	0	19.106	7.9666
0	0	0	0	3.1601	2.5177	1.5546	2.0022	0	38.345	0.81885	0	1.6744	0.93083	0	2.572	2.0267	0	0	10.344	8.7417	0	3.0375	6.0363	7.1671	0.91175	0	11.454	0.32353	3.6008	20.246	0	0	6.7224	1.0774	0	1.3684	2.2206	5.4154	1.4548	0	0	23.817	8.554
0	0	0	0	2.7868	2.212	1.7548	2.621	0	37.211	2.5815	0	1.1409	0	0	0.023303	1.1971	0	0	9.5672	8.0316	0	1.4109	6.496	9.7684	7.2331	0	12.994	1.9509	5.7399	17.063	1.4478	1.5146	4.9356	0.43581	0	1.2175	3.0493	0	1.1664	3.3811	0	25.252	9.2343
0	0	0	0	2.3961	2.0815	0.66009	3.4921	0	34.861	2.267	0	1.3107	0.62113	0	1.1549	2.347	0	0.59703	7.4481	7.2717	0	0	7.3147	7.4899	8.509	0	10.018	3.3847	7.267	20.505	0	0	5.0454	0	0	2.103	4.024	1.689	0.97808	4.514	0	22.272	7.0859
0	0	0	0	1.3575	2.3222	1.7113	1.5065	1.4907	31.582	1.1255	0	0.83433	1.6088	0	1.8628	1.6667	0	0	7.1101	6.8534	0	0	6.5912	3.6627	0	0	9.4105	2.5799	7.2602	11.278	0	1.7748	3.4692	5.0177	0	1.3507	0.56589	4.2298	0.6612	0.85577	0	17.036	4.9407
0.58945	0	0.61773	0	2.6974	3.8561	3.0898	1.5714	2.5544	27.552	1.1563	0	1.2553	0.44767	0	0.38427	1.3579	0	0.36347	6.464	5.7935	0	3.1576	4.6942	8.0943	4.9668	0.10416	10.241	1.8714	0	13.781	0.067781	0	3.8184	0.85305	0	0.74285	2.4024	9.9986	2.2074	0.18694	0	13.123	5.0153
3.7551	0	0	0	1.6663	2.5779	0.62726	0.40694	0.88775	25.681	0.87165	0	0.52993	0	0	0.55675	1.2392	0	0.48091	7.8412	5.3933	1.2122	0	5.6541	7.2316	0	0	10.84	1.0519	0	12.151	0.37429	0	2.7705	0	0	1.1552	0	6.9475	0	0.88119	0	13.088	3.888
3.5341	0	0.6009	0	1.0591	2.6184	0.8728	1.7964	3.736	24.219	4.0759	0	0.85162	0	0	0.80599	0.26445	0	0	10.764	4.5939	0	5.8853	6.1343	6.1658	9.5721	0	13.583	0.66243	1.1992	13.149	0	0	3.6721	0	0	1.1859	2.1111	1.2182	0	2.317	0	7.3484	5.0273
3.5539	0	0.93695	0	1.7675	1.0743	0	2.308	4.1153	40.396	1.8087	0	0.93843	0	0	2.3444	1.1163	0	0	11.21	4.5278	0	7.3078	5.4699	7.2719	3.7542	0	10.453	0	0.97419	17.764	0	0	5.9536	0	0	0.5331	2.9023	7.499	0.35373	1.5837	0	11.251	4.7714
2.5942	0	0.17306	0	3.4675	4.8282	5.0157	3.7129	4.1463	56.847	0.64067	0	0.10718	0	0	4.1514	2.2622	0	0	8.6765	3.4706	0	10.48	6.0529	9.1908	2.5739	0	11.401	0	3.4348	17.376	0	0	3.5842	0	0	0.19041	3.0898	7.0565	0	6.0888	0	12.182	2.3542
3.2643	0	0.43841	0	3.1413	3.7776	1.5255	2.6059	5.3515	64.807	1.5288	0.47485	0.55081	0	0	1.8662	1.1107	0	0	9.4861	3.8448	0	10.596	7.8932	8.8817	0	0	10.368	0	7.836	20.07	0	0	5.5796	0	0	0	1.0755	10.134	0	4.1374	0	15.673	4.0657
1.8296	0	0.25144	0	3.658	3.3226	4.2369	4.4146	3.4727	63.483	0.42003	0.71106	0.2453	0	0	3.2904	1.7733	0	0	9.9224	2.09	0	11.924	7.2492	6.509	0	0	11.618	0	15.196	16.314	0	1.1344	3.0155	0	0	0	0	10.566	0	1.679	0	9.355	2.8215
1.9221	0	0.041031	0	4.5198	2.4476	4.1482	2.7327	6.4112	61.113	0	0	0.36424	0	0	2.5428	0.83832	0	0	10.096	1.7998	0	6.413	6.983	7.5031	5.8412	0	9.5449	0	8.4678	11.349	0	1.8294	3.8532	0	0	0.63289	1.0402	6.6618	0.82344	0.82452	0	11.713	0.23581
1.8834	0	0.88148	0	3.3764	0.9696	3.9076	2.7874	7.3284	58.286	0.65931	0	0.11702	0.15305	0	1.2111	3.3596	0	2.5927	9.7991	1.4155	0	12.682	6.1106	8.9631	0.17568	0	9.9388	0	8.1596	16.254	0	1.1156	6.8426	0	0	0.54134	3.3838	4.2514	0	2.3855	0	8.5298	3.7291
1.4788	0	0.28038	0	3.8561	3.3476	4.8215	1.9258	5.852	54.917	1.0856	0	0.093853	0	0	2.4977	1.0244	0	1.0992	11.92	0.91187	0	13.478	5.7639	10.148	1.3097	0	11.039	0	9.9022	15.655	3.7745	0	3.4924	0	0	0	3.2465	1.3112	0.020454	6.2515	0	7.137	5.0081
1.995	0	0	0	3.7383	1.1527	3.8209	1.377	9.2124	50.127	0.20493	0	0.68557	0	0	1.5922	1.5047	0	0.43228	10.998	1.6407	0	8.9362	7.6541	7.7524	3.9537	0	11.338	0	12.286	20.719	0	0	6.7578	0	0	2.0712	2.3525	3.4598	0	5.054	0	10.91	2.9835
2.5315	0	0	0	3.1896	1.5544	4.3236	0.42236	9.3399	48.875	0	0	0.014234	0	0	3.8694	1.6757	0	2.3462	11.715	2.5723	0	13.008	4.6186	9.7333	0.15645	0	11.457	1.6288	6.2165	20.194	3.3297	1.3756	3.5523	0	0	1.1597	5.6438	6.3488	0	10.071	0	12.648	4.1851
2.3895	0	0.77235	0	3.1651	1.2471	5.4223	1.7891	9.2803	45.597	0.78777	0	0.22446	2.4847	0	1.068	1.0564	0	1.7212	9.2173	2.3076	0	14.35	5.4332	8.7092	2.182	0	9.9366	0	14.892	18.899	0.030949	7.8185	6.8151	0	0	2.1543	4.9564	14.762	0	5.0316	0	7.3222	5.466
1.2976	0	0	0	2.5165	2.7876	2.4231	1.9891	10.927	41.961	2.3123	0	0.21206	4.4751	0	4.3734	0.7882	0	1.2965	6.439	0.89807	0	11.189	3.1622	11.469	8.6828	0	11.252	0	8.884	16.532	1.0813	11.156	7.2145	0	0	0.23365	6.1257	0.84714	0.26983	6.5153	0	10.074	7.6931
1.2468	0	0	0	1.5417	0	1.4961	0.81011	11.47	38.327	3.1185	0	0	6.5552	0	3.1537	0.88053	0	3.8534	14.329	1.4777	0	9.4008	2.6543	11.573	8.0217	0	9.5987	0	9.9877	18.59	3.1011	10.145	7.2072	0	0	3.8041	5.7304	1.67	0	9.3844	0	5.1626	8.0626
1.0394	0	0.53805	0	1.788	4.806	2.5802	0.64692	12.524	36.222	2.0331	0	0	4.1392	0	2.1964	2.403	0	2.7586	11.03	0.58536	0	8.8617	2.8281	12.698	11.057	0	10.263	0	10.659	21.241	2.9468	9.2842	3.497	0	0	3.7687	4.6576	2.0067	1.2319	7.8015	0	9.2092	8.1673
1.2106	0	0.058195	0	1.3168	0.991	2.4127	0.73259	11.359	33.368	3.2676	0	0	2.9568	0	1.9792	0.25135	0	2.0221	8.8243	1.757	0	5.5081	0.54638	10.568	3.9492	0.11192	10.307	3.6369	8.0577	20.22	0	4.6499	3.3656	0	0	2.947	6.4503	0.81061	0	7.2224	0	7.9573	8.1314
0.84095	0	0.10871	0	1.2108	3.1479	0.072386	0.47332	10.054	33.768	2.1786	0	0.042391	5.0264	0	2.4253	1.5612	0	1.6462	9.5864	0.27172	0	9.7964	1.0282	10.603	13.624	0	10.229	0	9.0435	17.703	3.202	10.071	5.8537	0	0	2.5064	7.3213	0	0	8.061	0	11.047	9.9741
0.7786	0	0	0	0.74967	2.5863	0	0.47195	11.36	37.784	2.6512	0	0	4.4792	0	4.178	1.0659	0	3.2804	13.527	0	0	9.5866	0	9.8805	3.2214	0	7.6572	0	4.7321	18.087	0	12.418	3.5797	0	0	3.9291	4.9567	0.93897	0	7.5972	0	15.859	5.0149
0.48413	0	0.34432	0	1.7422	0	2.7258	3.0115	9.1976	39.886	2.8174	0	0	3.9968	0	1.7484	0.38447	0	2.0622	6.435	0.82591	0	8.5498	0	9.46	6.854	0.22024	9.3055	0	0	14.176	0	16.223	3.5133	0.085565	0	2.6037	4.2064	5.2886	0	4.523	0	14.647	10.088
1.9623	0	0	0	1.1476	0	1.6979	2.5399	9.2209	41.776	2.2016	0	0.1309	3.9759	0	1.2011	0	0	2.6024	7.7534	1.3774	0	10.638	0	9.0127	1.5764	0.7195	8.423	0.27358	6.2901	14.623	0	17.427	4.0359	0.85554	0	2.2985	4.8086	4.3928	0	6.1164	0	16.605	6.6799
0.7072	0	0	0	0	2.7745	3.0324	1.2286	7.2671	46.815	0.95101	0	0	3.9533	0	2.7425	0.036334	0	1.2811	10.095	3.6223	0	8.7903	0.42528	8.115	2.9343	0.89448	7.0382	2.512	3.0667	8.9286	1.0443	13.582	3.5931	1.2053	0	2.8009	3.7432	5.1723	1.8002	2.5391	0	17.626	7.5932
1.1173	0	0.27143	0	0	2.994	0	2.9542	4.6764	46.63	2.1643	0	0	2.0111	0	3.4305	0	0	2.1214	9.6388	4.2284	0	6.7341	0	8.9613	1.4246	0.26298	5.5101	2.9457	7.0489	13.171	1.6017	12.878	3.5822	1.2492	0	3.7334	3.7675	1.9534	1.0871	3.8758	0	21.12	9.5917
0	0	0	0	0	1.8011	0.2154	1.2976	7.6058	43.353	1.1262	0	0	2.0267	0	0.52646	1.2833	0	1.2685	10.43	3.0274	0	11.961	0	9.5077	5.2599	0.82607	10.095	1.0647	0	5.0001	0	14.482	2.8392	1.8345	0	3.7306	4.3303	0.85109	0.51191	2.7252	0	22.536	8.7262
0.31464	0	0	0	0	0	3.2393	1.4346	7.7155	49.125	1.4197	0.69237	0	1.624	0	3.7572	1.5905	0	1.8138	11.926	2.7593	0	7.8409	0	9.0633	4.4933	0.22473	7.0838	0.92039	2.2037	9.9992	0.25578	12.69	3.5057	1.3859	0	3.418	5.6337	4.3317	0.24953	0.40768	0	20.244	9.1739
0.21661	0	0.69941	0	1.0273	0.71204	1.3508	2.5033	7.1572	49.735	0.64912	1.125	0.041396	2.0774	0	1.7829	0	0	0.44512	10.201	0.58185	0	7.7216	0	3.1982	0	0.26454	7.6387	0.26974	4.9471	7.6306	0	11.994	7.037	0	0	1.7935	7.0734	6.0453	0	1.5555	0	22.907	6.8188
0.24904	0	0	0	1.9064	4.8379	1.9593	4.2921	6.9616	55.392	2.2533	1.1449	0	0.46871	0	1.1121	0.20032	0	4.3721	12.824	0	0	9.3795	0	8.7621	4.1508	0	4.3396	5.6457	6.5968	4.2572	3.9638	11.614	0.38876	0	0	2.6615	9.7308	5.222	0	3.6301	0	25.013	7.8397
0.93319	0	0	0	0.69189	3.635	6.1929	3.6804	5.8177	59.5	3.6423	0.42758	0	0	0	0.93423	0	0	3.8653	12.644	0	0	6.6377	0.29902	9.8332	5.0054	0	5.9786	0	3.3623	8.7484	0.43994	9.9895	5.6942	0	0	3.0018	12.442	6.9149	0.8062	3.0262	0	22.444	5.737
0	0	0	0.074752	2.7659	3.9213	4.9881	2.7784	4.0648	70.315	3.6374	0	0	1.3513	0	0.025944	0.87581	0	5.3292	9.5902	0	0	3.9733	0	13.521	0	0.1718	6.9746	3.1997	3.4601	7.1409	1.8709	15.089	3.2452	0	0	2.4049	10.575	7.8084	0.88249	2.6369	0	19.002	7.6867
0.18624	0	0.09707	0	3.1825	1.7898	3.0359	4.0521	4.0015	79.493	2.8754	1.1368	0.22011	1.61	0	3.318	0.79212	0	4.646	12.397	0	0	5.4633	0	6.7861	3.6863	0	2.9334	0	4.8125	9.9433	0	16.843	5.0257	0	0	3.5612	14.098	4.1537	0.46751	3.994	0	20.338	4.7124
0.64157	0	1.3411	0	3.2594	1.4286	4.2465	6.2101	1.7905	82.289	2.9882	2.0862	0	0.35397	0	1.3292	0	0	4.2798	12.522	0	0	4.8837	0.12807	11.36	0	0.67713	5.2573	3.8576	3.2687	11.434	0.27965	19.847	3.5304	0	0	2.9088	13.751	6.8199	0.40069	2.829	0	14.883	5.9716
0	0	1.4653	0	2.4382	1.5414	2.6608	1.9021	0.9941	85.471	4.3571	2.3779	0	2.002	0	0.63327	1.4037	0	2.6136	7.4511	0.51098	0	2.4267	0	9.4731	4.1196	1.0749	6.3539	2.4814	3.9557	9.426	0	17.117	4.2716	0	0	0.44237	13.036	8.9865	1.0185	0	0	17.278	4.6448
0.27403	0	1.1948	0	3.5872	0.99608	2.648	3.3642	1.036	84.486	5.6538	1.2948	0	1.0045	0	0.97651	0	0	6.4461	10.834	0	0	0	0	9.8041	0	0	6.5194	0	0	10.361	0	17.202	4.0281	0	0	0	14.999	6.4159	0	0	0	22.678	4.3211
0	0	0.84233	0	4.6561	1.6185	3.3679	2.8084	0	83.183	5.8327	2.1542	0	2.4091	0	0.46901	0	0	4.7683	7.7099	0.25734	0	1.0323	1.2105	10.126	0	0	9.4892	1.9018	0.079052	10.754	1.5267	23.552	5.788	0	0	1.5804	15.549	5.5406	0.76924	2.8744	0	18.861	4.7329
0	0	0.3812	0	3.149	0	5.0692	4.6848	0.1767	87.503	3.8338	3.064	0	2.2634	0	3.0423	0	0	1.8398	7.9511	0	0	0	0	12.363	0	0.43905	8.2308	2.542	1.2609	17.429	1.9001	23.572	3.9729	0	0	0	13.515	5.5493	0	0	0	23.17	4.7425
0	0	2.2067	0.058343	3.2376	0.3551	1.691	7.1702	0	85.567	2.776	1.8915	0	1.4519	0	1.1725	0.38209	0	4.6809	10.631	0.43841	0	3.0887	0	12.786	1.2779	0	6.94	1.8761	1.685	15.314	2.7237	26.753	6.2804	0	0	0	13.475	1.4149	0	5.939	0	21.32	4.9119
0	0	0	0	4.2623	0.82062	2.4626	4.7409	0	81.089	4.6232	0.14903	0	1.4668	0	1.3001	0	0	0.80436	12.302	0	0	2.1473	1.199	13.427	5.7213	0	10.249	0	4.8676	12.989	2.5809	21.594	5.2999	0	0	0	15.19	2.3787	0	0.24925	0	23.942	6.3909
0.035327	0	0	0	3.0683	1.7431	1.2593	2.5386	0	76.613	4.5538	0	0	0.25231	0	2.092	1.014	0	3.8443	9.7574	0	0	0	0	12.664	4.4642	0	11.256	1.488	0	13.527	2.7251	19.352	5.295	0	0	1.2723	14.479	0	0	3.4124	0	26.73	6.4241
0	0	1.2263	0	2.3978	0	4.5636	3.8982	0	73.128	4.0044	0	0	0.35911	0	2.2264	0.26325	0	3.6325	8.9152	0	0	1.6005	0	12.233	6.2234	0	8.6762	2.1197	1.847	15.924	2.8641	16.519	6.7495	0	0	0.81254	14.636	0	0	0.60691	0	26.406	7.5533
0	0	0.52471	0	1.7545	2.5608	3.3606	4.1632	0.14988	67.215	5.8751	0	0	0.084785	0	3.155	0	0	0.61549	12.597	0	0	0	0	12.51	3.076	0	9.5647	0.10759	1.194	13.654	0	11.779	6.002	0	0	0	14.387	4.754	0	0	0	26.239	7.1318
0	0	0	0	1.6501	3.6729	2.3571	4.2748	0	64.7	5.7295	0	0	0.97088	0	0	0.34105	0	3.9219	10.653	0	0	2.1793	0	11.117	4.6384	0	9.9234	0.65782	0	12.781	1.929	9.6287	6.1395	0	0	0.094017	10.185	6.6395	1.1497	0.52666	0	22.706	7.2956
0	0	0	0	1.0585	5.4229	1.8061	3.8305	0.9335	60.127	3.8907	0	0	0	0	1.1638	0	0	2.836	7.235	0	0	5.9852	0	7.274	0	0	10.047	4.3577	0.80801	15.461	0	9.8434	4.6834	0	0	2.2279	9.0479	3.6817	0	2.3155	0	23.895	5.7912
0	0	0.07258	0	0.19598	5.3287	0	1.8437	1.8363	56.865	5.2285	0	0	1.3334	0	0	0	0	4.0502	7.8107	0	0	4.5257	0	7.2186	0	0	7.7476	0	0	10.846	0	7.0025	5.5733	1.0343	0	0	7.2731	0	0	0	0	22.329	6.2579
0	0	0.27162	0	0	5.7455	0.50299	2.568	2.8067	52.943	4.7224	0	0	2.3749	0.10925	0.15987	0.58367	0	2.1762	4.5288	0	0	2.9309	0	3.5537	0	0	6.5539	3.7449	0	12.001	0	4.7401	7.1656	0.56045	0	0.77077	8.029	0	0	0	0	23.269	7.8394
0	0.33977	0.056724	0	0.77231	4.0491	0	2.7599	1.5365	48.259	5.8302	0	0	0.90506	0	1.114	1.9696	0	2.635	8.5412	0	0	4.8149	0	6.169	0	0	8.7425	5.267	3.4726	14.99	0	3.3071	2.7782	0	0	0.75899	5.9304	0	0	2.1365	0	17.614	5.4447
0	0	0.27737	0	1.4423	4.944	0	3.4861	3.3124	44.453	6.3216	0	0	2.3783	0	0	0	0	2.514	5.5948	0	0	2.2291	0	5.4578	1.6437	0	4.3899	2.8785	5.061	12.59	0	0.68631	2.1273	0	0	0	7.4732	0	0	0	0	17.851	7.6658
0.28633	0.20124	0.2436	0	0.61966	6.0157	0	2.4576	2.7587	41.895	4.4879	0	0	2.7053	0	0	0	0	4.558	6.05	0	0	3.1423	0	6.416	0	0	6.6893	2.1251	0	10.134	0	4.5015	5.1616	0	0	0	7.0149	2.0294	0	1.3356	0	15.363	8.0252
0.63863	0	0	0	0	3.1405	0	4.2042	1.5023	38.123	4.182	0	0	3.4239	0	1.1699	0	0	3.3969	1.6185	0	0	1.0111	0	4.6871	0	0	4.5183	0.76935	0	2.3859	0	1.3433	5.2235	0.5674	0	0	7.8725	2.1334	0	3.1175	0	15.895	6.8486
0.0020318	0	0	0	0	4.2846	0	4.2216	0.53562	35.905	3.0369	0	0	3.2028	0	0	0	0	2.3501	5.1054	0	0	3.3026	0	5.5392	2.8449	0	6.6185	3.1351	0	8.2039	0	1.0374	2.7257	1.7885	0	0	6.5142	2.1919	0	0.76245	0	15.656	7.0657
0.38884	0.46066	0	0	0.14788	2.0734	0	3.0901	2.242	32.05	3.9694	0	0	1.3073	0	0	0	0	0.1212	6.0108	0	0	4.3751	0	3.9028	0	0	6.5815	1.9388	0	6.0896	0	3.6898	3.2534	0.75652	0	0	7.8076	2.9205	0	2.6643	0	9.1512	4.7555
0	0	0.16442	0	0	5.2433	0	1.6855	1.4868	29.688	3.5329	0	0	0.93503	0	1.0181	0	0	2.5599	10.867	0	0	4.0417	0	3.3556	0	0	5.4651	0	0	8.5476	0	6.3693	0	1.7156	0	0	6.8548	1.317	0	0	0	8.8525	2.9541
0.52314	0	0	0	0	4.6071	0	2.2113	0.8356	27.447	4.1111	0	0	3.5083	0	0	0	0	1.8697	14.529	0	0	4.3709	0	6.1854	2.912	0	5.9977	0	0	10.294	0	5.6135	4.8358	0.23618	0	0	7.967	1.3812	0	0	0	2.8071	8.3599
0.66051	0	0	0	0.87829	1.1077	0	1.2492	0	23.91	2.2484	0	0	4.3334	0	0	0	0	2.2342	9.6643	0	0	0.91898	0	5.0045	0	0	7.1371	3.9781	0	14.325	0.50985	3.8072	5.6934	0	0	0	9.2454	0.10663	0	0.12738	0	10.877	7.947
0.26771	0	1.0521	0	1.8327	1.9565	0	1.4162	1.0029	22.098	2.2475	0	0	3.0133	0	0	0	0	4.4116	13.721	0.094978	0	5.8268	0	6.4028	4.7477	0	6.1713	3.4609	0	17.958	1.274	4.2166	6.719	0	0	0.24476	11.829	3.7736	0	0	0	13.639	8.2915
0.62354	0	0	0	1.6932	2.392	0	2.0931	0	19.434	3.3416	0	0	1.6905	0	1.4753	0	0	3.8608	8.8591	0.30307	0	3.901	0	9.0144	8.5875	0	5.9372	0	2.148	15.263	0	2.8103	6.8301	0	0	0	11.518	0	0	3.7556	0	15.049	7.8523
0	0	0.5454	0	1.8203	3.8024	0	0.3339	0.32757	18.165	2.3425	0	0	1.3318	0	1.537	0	0	0.56882	8.3562	1.8916	0	2.9103	0	10.188	10.111	0	7.6342	0	0	17.833	0	2.6437	9.4112	0	0	0	8.1221	5.7108	0	2.0286	0	13.509	8.3182
0.58936	0	0.58033	0	0	1.9599	0	1.2423	0.041094	16.93	1.9194	0	0.1766	2.9476	0	3.9211	0	0.14447	0.43144	10.961	1.7175	0	3.5709	0	5.1833	4.3646	0	6.0367	0.844	0	16.476	0	5.5773	6.8391	0.84399	0	0	9.3671	0	0	0	0	9.0009	7.7874
0	0	0.6512	0	1.75	2.3729	0	0	0	20.95	3.0185	0	0.27276	7.1401	0	0	0	0	1.1656	17.468	1.7259	0	0.53611	0.096778	9.3394	5.9344	0	5.1706	0	3.5624	19.155	0.15432	3.3888	6.3943	0.80792	0	4.7237	8.7311	0.22512	0	1.9278	0	13.653	11.741
0	0	0.61443	0	3.3703	2.6188	0	1.7048	0	37.354	4.0129	0	0	5.5587	0	0.11134	0	0	0	21.978	8.4934	0	0	0	7.7207	0	1.3313	7.915	1.965	0	25.109	0	7.0459	8.7031	2.0487	0	1.7331	9.0852	8.6506	0	2.1979	0	19.266	12.52
0	0	0	0	2.8022	1.8095	0	0.88011	0	57.705	4.4779	0	0	5.7172	0	3.3787	0.60982	0	1.4062	25.119	12.994	0	0.71395	0	8.3642	0.22076	4.4204	8.0702	3.3229	3.5083	25.524	6.9843	13.427	9.7837	4.6251	0	6.525	11.879	15.228	0	1.7542	2.5355	24.127	14.482
0	0	0	0	2.4391	2.6783	3.0431	3.4822	0	65.092	4.0026	0	0.47951	5.6458	0	1.4545	0	0	4.316	24.873	15.142	0	0	0	8.0759	4.6016	5.7895	9.8163	4.1824	1.8415	21.898	8.1514	18.658	8.7794	8.9947	0	3.39	12.277	7.6053	0	2.4813	3.5992	26.168	19.634
0	0	0	0	1.7199	1.8594	1.5527	0.99133	0	65.985	3.8206	0.39009	2.5357	5.0708	0	1.1391	0	0	8.4033	24.499	18.202	0	0	0	8.2567	13.401	7.6614	11.18	2.937	0	19.863	16.064	19.937	12.797	10.985	0	3.6663	12.871	11.381	0.66219	3.5034	0	28.798	23.563
0	0	0.47058	0	0.88191	4.4648	0	0.24533	0	63.378	4.0143	0	4.379	2.4767	0	1.3194	0	0	9.1287	23.119	18.589	0	0	3.7598	7.8715	15.329	9.0277	6.7553	3.0023	0	17.808	14.395	18.262	10.429	10.644	0.65941	3.1438	12.411	5.1987	3.8588	1.9258	2.5097	19.662	20.345
0	0	0.60384	0	0.50611	3.4724	0.61103	2.6764	0	60.568	3.2076	0	4.4579	2.8229	0	1.7944	1.4889	0	7.5817	19.704	16.423	0	0	4.4819	10.833	10.327	8.4905	8.9114	0	0	19.815	9.2666	19.092	12.857	9.0091	0	3.4985	14.13	3.5099	2.9356	5.144	4.8203	21.822	20.622
0	0	0	0	2.5998	5.9658	0.079844	0.32511	0	57.764	3.1529	0	4.9624	2.94	0	3.1446	0.38852	0	6.6265	21.635	14.461	0	0.55174	6.5563	9.3825	14.488	7.8194	7.599	1.3106	0	21.112	7.9598	17.667	12.259	9.5199	0.41109	2.3177	12.701	5.5175	5.3769	2.5665	0	21.213	20.97
0.2211	0	0	0	1.6832	4.5148	0	1.2671	0	59.031	4.8536	0	4.7759	2.8627	0	2.0843	0.2197	0	9.1219	23.398	13.625	0	0	5.8174	6.2497	13.231	5.9641	5.8843	3.5515	0.57921	18.904	6.9546	12.834	7.6194	8.9554	0	3.2098	11.585	5.3927	4.1986	1.9026	0	16.381	16.863
0	0	0.19288	0	1.541	2.3748	0	0	0	56.437	4.8639	0	4.8377	2.7199	0	1.7409	0	0	7.1093	13.547	10.689	0	2.517	3.947	6.7539	9.8743	4.7658	6.8296	1.7645	4.8765	17.692	4.4599	9.252	8.0477	9.3325	0	3.9076	9.451	7.3919	4.1617	0	0	12.633	14.994
0.393	0	0	0	2.1317	1.3417	0.87152	3.0002	2.9731	54.922	5.3294	0.31966	4.8485	4.5849	0	1.7994	0	0	8.275	13.549	9.2872	0	1.3085	2.0972	2.3213	12.712	3.0102	7.0961	5.3201	0	20.034	5.8038	7.8847	7.939	9.346	0	1.3614	5.5312	5.2717	2.8697	0	0	14.374	14.051
0.54434	0	0.0017492	0	0.28286	4.1192	0.9454	3.3497	0.020504	50.001	4.998	0	4.4125	4.1264	0	1.7556	0	0	3.8475	10.955	6.9653	0	0	2.5758	1.0744	8.8308	2.1668	5.548	7.4851	0	18.496	2.6464	5.2088	6.9059	9.1641	0	0.85242	4.6466	0	3.1845	0	0	16.037	13.108
0	0	0.19423	0	0	1.1829	0	2.3906	0.20893	48.638	5.1968	0	4.6067	2.8906	0	1.327	0	0	3.6206	13.194	6.4318	0	0	2.3857	2.8239	2.2639	2.5387	4.8772	3.6407	0	17.067	6.1071	2.4294	7.9121	7.4383	0	0.66775	6.1829	4.1627	3.9825	0	0	12.405	13.181
0.89021	0	0	0	0.67982	0	0	4.9302	0	46.322	3.6583	0	4.2896	3.3196	0	4.6642	0.14142	0	5.1618	12.289	5.7254	0	0.28005	6.3996	5.409	2.3165	2.8094	7.2651	0	0	17.98	2.4694	0	7.6455	3.5104	0	0.10116	5.4332	6.5569	0.76262	1.728	0	12.335	12.709
0.5368	0	0	0	1.0098	1.5856	0	4.0985	0	42.873	4.3274	0	3.5431	2.6854	0	3.7568	0	0	1.3812	10.476	5.0473	0	5.6006	6.9743	2.5835	16.518	2.757	7.3168	1.8206	0	16.479	0	3.1214	5.4925	5.1487	0	0.48601	6.4844	2.6029	2.9653	1.3166	0	11.929	13.586
1.4482	0	0.40173	0	0	3.8581	0	5.2678	0.66457	47.591	1.7997	0	3.8889	2.8026	0	2.7774	0	0	2.9402	8.7368	3.0911	0	3.3103	4.9432	3.0903	4.2743	0.72524	5.142	3.8804	0	18.806	0	2.615	6.5845	5.3289	0	0.44345	4.3818	5.7028	2.4315	0	0	11.359	8.5084
2.8992	0	0	0	0.36275	0.45618	0	5.6448	3.5004	50.496	3.101	0	4.346	2.3434	0	3.7575	0	0	3.2815	9.0911	3.7224	0	0.82195	4.5676	2.3425	8.807	1.6452	7.737	0.85695	0	14.486	1.6735	0.10418	7.5584	3.3062	0	0	6.5647	3.0856	1.8639	0.41943	0	6.2593	12.49
1.6369	0	0.16794	0	0.28944	0	1.7438	2.8795	0	48.552	2.775	0	4.2931	1.1969	0	3.714	0	0	2.5318	10.093	6.0392	0	0	4.8876	5.8139	7.5069	1.9313	7.8497	0.12987	0	13.346	0	1.8401	8.7514	0.80194	0	1.2059	8.2026	7.4244	3.1955	1.6457	0	8.0981	10.888
2.2007	0	0	0	0	0	0	2.1116	0	44.912	1.7193	0	4.4725	0.84443	0	3.5384	0	0	4.8341	8.4753	7.4154	0	1.2017	4.5424	5.5312	5.7902	2.8362	7.4274	0	0	15.51	2.5027	0	9.7309	3.1415	0	0.61615	9.6961	6.7045	4.7148	0.37269	0	8.3698	13.033
1.2956	0	0	0	2.0974	1.2758	0.15442	2.1747	0	41.478	3.81	0	3.7631	1.2733	0	1.9826	0	0	1.4718	10.513	6.8984	0	0	4.0927	7.6603	1.861	2.1017	7.017	0.34658	0	13.304	4.3848	0.33968	8.1902	3.1458	0	2.7168	9.5577	4.5758	5.1231	1.9945	1.1753	7.587	12.482
1.5788	0	0	0	0	2.2801	0	5.495	0	37.702	3.4205	0	4.5401	1.0406	1.7438	3.5697	0	0	2.6151	9.7568	5.2944	0	0.59873	3.1781	5.8426	4.3005	1.2623	8.6581	0	0	7.6502	0.67611	0	7.9952	4.4131	0	0	5.5176	0	4.5077	2.9247	0	9.1861	11.705
1.6276	0	0	0	0	0.98222	0.32376	2.3816	0	34.897	3.3228	0	4.554	0	0	3.4359	0	0	4.6103	4.6318	6.3247	0	0	2.2634	6.3313	6.0787	1.7622	7.1437	2.4194	0	13.416	2.5975	0	10.384	4.0381	0	0	9.4842	2.2171	6.7134	1.393	0	4.9461	14.054
0.50286	0	0	0	0.3763	1.1628	0	3.1041	0	32.147	4.6982	0	4.3554	0	0	1.272	0	0	2.6259	5.994	4.7325	0	1.6455	2.8226	5.6785	5.0473	0.23581	7.337	0.47492	0	14.7	0.030011	0	6.8961	1.2633	0	0.93595	9.7183	1.2137	6.9875	1.7715	0	8.8889	12.541
0.21295	0	0	0	0	0	0	3.1748	0	28.418	2.8036	0	3.8537	0	0	2.0045	0	0	2.379	3.7536	6.2056	0	4.5421	2.2125	5.1243	5.3898	1.0857	4.6276	2.2041	0	8.4203	3.1866	0	10.353	0.63847	0	0	9.771	5.9335	5.8766	1.1603	0	8.5688	10.747
1.1533	0	0	0	0	0	0	0.77184	0	27.062	2.2002	0	3.9435	0	0	0	0	0	1.7279	4.8404	4.357	0	0	1.1288	6.4224	8.2259	0.61025	8.9096	1.3359	0	12.334	3.3657	0	7.9897	0.85283	0	0	8.3982	5.2529	6.3785	0.048903	0	11.069	9.5539
0.27558	0	0.11234	0	0	0.10789	0	1.1766	0	22.267	4.4558	0	3.9486	0.32255	0	0.7799	0	0	0.92061	2.6635	3.4582	0	2.2261	3.2277	4.7237	1.5462	1.0922	6.8498	1.3718	0	12.41	0.065309	0	9.073	0.62052	0	0	8.5892	4.9755	4.1453	1.0937	0	13.256	9.3115
1.4115	0	0	0	0	0.40488	0	2.7591	0	21.811	4.5481	0	3.3091	0	0	0	0	0	1.5868	4.567	3.0316	0	0.42576	0.37624	5.737	3.9433	0.040091	6.9261	0	0	12.105	4.7033	0	8.5958	0.046969	0	0	7.9457	3.1711	2.9978	0	0	14.724	8.7594
1.4192	0	0	0	0	0	0.83709	2.2265	0	21.795	3.8607	0	3.0415	0	0	2.2589	0	0	2.0247	2.2072	2.9919	0	0	1.3249	5.399	1.1795	0	8.9117	0	0.1506	13.055	3.2971	0	7.8915	0	0	0	7.3441	2.7255	4.4943	0	0	15.906	9.7747
1.0379	0	0	0	0	1.2873	0	1.3155	0	20.715	3.3206	0	3.6318	0	0	0.25515	0	0	4.2405	4.8955	1.913	0	0.80681	2.7971	5.7769	5.259	0	5.2217	0.86885	0	14.284	3.9635	0	6.9058	1.14	0	0	9.2785	3.3741	10.305	0.29105	0	17.799	8.9872
1.3035	0	0	0	0	0.15996	0	2.9306	0	20.253	2.6251	0	5.1315	0.17366	0.068046	3.2944	0	0	3.3198	3.9387	0.88218	0	3.8797	1.4671	5.4477	0.66095	0	3.4314	8.9604	0	7.0551	0	0	7.6866	2.0396	0	0.83949	6.2545	5.7897	17.268	0	0	15.394	8.4742
1.7864	0	0.75791	0	0	2.694	0	3.9572	0.2059	18.672	3.6529	0	4.822	0.73655	0	1.2307	0	0	3.2121	2.7706	0.14401	0	0.56337	0.96768	3.199	0	0	6.7091	7.08	0	7.2557	2.5574	0	6.9308	1.5115	0	2.6631	8.3667	3.7097	21.052	1.2879	0	11.913	10.861
1.485	0.20642	0.082367	0	0	0.6492	1.3601	4.3169	0	17.216	5.679	0	5.3323	0	0	1.8807	0	0.09919	5.8286	3.9451	1.7219	0	5.2797	0.84272	6.668	4.4051	0	8.1833	3.5742	0	9.1926	1.864	0	7.4749	0.91208	0	1.6616	11.138	7.7571	20.115	0.98002	0	19.519	8.9652
1.9388	0	0.044627	0	0	4.0454	1.6066	6.7261	0	14.582	3.6978	0	5.2931	0.68924	0.083499	3.0352	0	0.62607	3.863	2.8521	0.36586	0	4.4909	1.3112	8.7601	8.2224	0.28682	11.768	3.1029	0	12.712	6.8141	0	10.507	0	0	0.89312	12.153	8.1406	20.263	2.2703	0	14.919	8.3091
1.6735	0	0.23787	0	0.15614	2.6355	1.3944	5.0578	0	13.227	4.0015	0	5.0411	0	0	2.3664	0	0	4.8532	3.9248	0.49615	0	1.2771	1.1704	8.7548	3.4069	0	10.011	3.3538	3.5342	10.995	0.72129	0	9.5349	0	0	0.32846	14.05	11.308	19.552	4.4453	0	17.421	9.1153
1.3699	0.30949	1.098	0	0	1.9424	2.0906	4.7149	0	12.252	4.9831	0	5.6653	0.015554	1.1913	1.514	0	0	6.3032	1.8224	1.6467	0	5.5658	3.0901	5.0338	8.6721	0	9.6656	7.1207	0	6.3551	2.2105	0	10.784	0	0	0.3848	13.11	10.021	19.135	6.0358	0	18.507	7.9271
2.0681	0.19507	0	0	0	2.4605	0	7.4712	0	10.609	4.6965	0.11253	5.1445	0	0	0	0	0	5.8426	3.7078	0	0	8.0945	1.7192	4.3229	8.0722	0	8.2913	6.9094	0	6.8637	0.25152	0	11.982	1.3469	0	2.1865	13.827	4.6333	19.692	2.5198	0	12.953	8.4642
1.5411	0	0	0	0	0.67736	0	5.8012	0.4287	10.168	1.3163	0	4.8957	0	0	1.4397	0	0	4.2289	2.2878	0	0	6.3693	1.0981	5.2177	7.358	0	4.9535	4.7795	0	6.2218	0	0	6.786	1.7742	0	1.4403	12.779	8.1032	21.603	2.8503	0	10.468	5.9207
1.7927	0	0.61174	0	0	2.6285	0	6.4888	1.2838	8.209	2.0811	0	4.3524	0	0	2.8572	0	0	2.0013	3.3975	0	0	8.9078	2.0913	5.0155	4.5773	0	9.17	5.1393	0	5.8891	0	0	9.0566	2.4274	0	0.084893	12.74	4.0747	20.448	2.042	0	11.111	5.3573
1.3668	0	0.44731	0	0	4.7893	0	5.9315	2.1813	8.8184	1.987	0	5.0493	1.1844	0	1.9305	0	1.1799	4.3	1.5352	0	0	5.4285	0.63308	0.9829	0	0	8.0269	5.5478	0	9.0648	0	0	8.6712	1.0164	0.074029	0.42758	16.121	4.3057	19.884	1.2774	0	11.607	8.0691
1.5393	0	0.30521	0	1.1773	2.8203	0	5.3925	0	7.6345	1.6451	0	4.5323	0.49789	0	1.3659	0	0	4.5796	2.9813	0	0	1.5861	0.51327	4.9903	2.8358	0	8.2529	7.3176	0	7.0919	0.34189	0	9.2319	1.2224	0	0	14.218	2.629	17.887	0.25556	0	13.578	7.8226
1.451	0	0	0	0	2.8933	0	4.9845	0.99471	5.1519	3.0674	0	4.0944	0	0	1.3679	0	0.1186	2.6217	2.7113	0	0	6.0048	0	4.6099	4.55	0	9.8664	7.4702	0	7.0471	0	0	8.8565	1.0828	0.32584	0.14083	13.673	6.5679	16.218	2.6343	0	12.11	7.2284
1.432	0	0.23839	0	0	1.3893	0	4.3482	1.3135	4.908	3.371	0.41862	3.7458	0.36082	0	1.3553	0	0	4.5367	0.8378	0	0	2.7897	0	1.7218	2.8613	0	9.2184	6.6627	0	10.846	0	0	6.9816	1.7147	0	0	15.677	2.6835	14.661	4.7807	0	7.9542	8.8975
0.42059	0	0	0	0	2.9708	0	3.1298	0.81511	4.9083	3.3029	0	3.7032	0	0	1.8165	0	0.30188	3.1545	1.3648	0	0	2.9144	0	2.8288	3.024	0	8.5076	6.304	0	4.7325	0	0	8.0975	0.79212	0	0	16.472	3.4805	15.998	2.2046	0	8.7289	8.2643
1.4625	0	1.6561	0	0	0	0	3.3881	1.6922	5.5575	2.6241	0	3.337	0.36482	0	1.1632	0	0	3.9368	1.1083	0	0	0	0	3.9688	6.3182	0	6.3543	0	0	8.0945	0	0	8.2202	1.7326	0	0	16.854	0	14.835	2.5319	0	8.9787	6.8091
0.41086	0	0.32761	0	0	1.7867	0	3.3297	0.9707	3.042	0.42777	0	3.6677	0	0	0.47814	0	0	4.0112	2.2879	0	0	2.7924	0	4.9479	3.3406	0	7.4697	0.58328	0	5.7491	0	0	4.5779	1.041	0	0	14.129	0	13.784	0.29539	0	4.2328	5.7215
0.1567	0	1.5663	0	0	1.0899	0	2.9915	0.7943	2.343	1.0088	0	2.9072	0	0	0.9897	0	0	4.3231	1.0273	0	0	3.8896	0	5.0046	3.6183	0	6.076	2.0121	0	4.5991	0	0	5.6272	0	0	0	17.675	0.58254	13.845	0	0	8.999	7.3513
0.59537	0	1.5171	0	1.1203	0	0.32596	3.5985	0	2.5124	2.1589	0	3.8176	0	0	0	0	3.2236	3.441	9.2637	0.20988	0	2.5232	0.8053	8.3361	4.0815	0	9.2767	1.6887	0	5.945	0	0	5.9762	0	0.80183	0	19.559	1.09	12.14	3.9961	0	11.731	10.089
0.6308	0	0.62642	0	0	0.1004	0.63031	3.5388	0	2.7006	1.5491	0	3.2713	0	0	0	0	2.0794	3.4868	5.5115	3.3725	0	0.37542	0.097068	8.7354	4.4225	0.63101	8.6039	4.1741	0	8.7758	1.5513	0	6.0972	0.066165	0.58037	0.48649	21.323	7.539	10.906	3.5073	0	20.81	7.0545
0.38252	0	0.18953	0	0	0	0	2.896	0	3.366	0.18915	0	3.5664	0	0	0	0	0	4.5926	8.7313	4.501	0	2.6212	0	10.195	5.8378	0.14181	12.404	0	0	12.144	1.6461	0	6.6024	0	0	0.80742	24.315	5.8314	11.071	3.6794	0	15.315	9.832
0.40581	0	0	0	0	0	0	0.80656	0	2.472	1.563	0	2.9721	0	0	0	0	0	4.6267	0.17325	7.2018	0	0.75869	0	12.991	5.9322	1.9847	9.3833	4.6736	0	13.337	0	0.48059	6.3957	3.7028	0	0	20.184	0.7652	11.91	0	0	13.32	13.509
0.017023	0	0	0	0	0	0	0.3824	0	1.8735	1.2457	0	3.3007	0	0	0	0	0	5.5464	5.8704	6.8317	0	2.5732	0	14.606	6.3337	3.154	6.2619	2.494	0	11.985	0	0.053243	8.0871	4.0509	1.8585	0.0002668	22.228	2.8037	13.445	1.4868	0	17.188	15.53
0.14914	0	0.21839	0	0	0.31891	0	0	0	1.9581	1.2186	0	3.8019	0	0	0.96501	0	0	3.9066	0.7349	6.262	0	0.35885	0	15.055	2.4389	2.5369	6.8406	0.74466	6.3642	12.549	1.2378	2.9826	5.5879	2.6603	0.90726	0.73058	22.738	2.3002	14.896	2.2831	0	17.641	14.58
0	0	0.3877	0	0	0	0	0.93444	0.58796	0.94456	0	0	3.4618	1.1927	0	0	0	0	5.2788	1.0796	7.9668	0	1.9781	1.8361	8.8959	4.6969	2.9306	5.7952	2.97	0	9.9597	0	0.72851	4.6164	6.0491	0	1.0628	23.193	0	16.277	1.0126	0	14.337	17.194
0	0	0	0	0	0	0	0	0	0.28986	0.54527	0	4.4186	0	0	0	0	1.7815	4.229	8.1924	10.023	0	5.3733	2.2481	11.876	5.4275	3.1403	7.3258	1.5309	0	12.233	5.0611	3.2189	6.6404	4.0874	1.9292	2.291	23.558	2.743	16.606	3.0501	0	15.606	18.158
0	0	0	0	0	0	0	0	0	0	1.4436	0	3.9092	0	0	2.2162	0	0	4.6342	7.9233	9.8482	0	5.0513	1.0872	17.213	8.5983	4.1602	10	0	0	8.5687	1.1519	5.8007	3.5355	2.4394	0	0	29.269	0	17.007	6.7046	1.7774	18.978	23.998
0.24249	0	0	0	0.33249	0	0	0.12872	0	1.2567	1.7117	0	4.5414	0	0	0.13239	0	0	3.0642	3.6411	12.142	0	1.5235	4.1693	16.622	11.791	3.5095	8.7684	0	0	11.709	0.43823	5.1953	4.8124	2.3226	3.2015	0	27.455	0	18.933	4.4712	0	18.332	20.591
0	0	0	0	0.27929	0	0	0	0	3.4111	1.1433	0	4.7533	0	0	0	0	0.6581	5.5589	7.551	10.495	0	1.4164	6.1544	16.115	3.3723	5.6622	8.1029	0	3.8966	9.2502	7.6038	8.7864	2.7917	2.8994	1.1404	1.6582	27.652	0	16.641	7.2639	0	22.619	22.991
0	0	0	0	0	0.039481	0	0.74865	0	4.2497	2.2898	0	5.1057	0	0	0	0	0	5.0728	9.147	10.249	0	2.5123	10.697	19.206	7.3498	4.9483	8.7563	0	0	10.009	4.8456	1.1967	4.7393	2.4668	0	0	28.553	0	17.871	7.1072	0	23.462	16.759
0	0	0	0	2.1632	0	0	0	0	3.7531	2.3737	0	4.3884	0	0	0	0	0	3.6918	8.3724	9.075	0	1.2017	14.356	14.646	10.19	4.8547	9.0579	0	0	10.567	0.70595	2.1476	2.2867	3.1868	0.12226	0	28.631	0	16.585	3.3013	0	25.195	17.912
0.13648	0	0	0	1.2817	0	0.29876	0.28671	0	2.2392	0.64094	0	4.4694	0	0	0	0	0	7.1876	10.471	7.8175	0	3.5408	17.744	11.751	3.6693	3.362	8.0195	0.40422	0	8.8169	2.0681	0.91683	4.4731	3.0922	2.2107	0	29.47	0	15.508	6.7188	0	21.705	16.095
0	0	0	0	1.2472	0	0	2.1922	0	2.6046	0.54713	0	4.696	0	0	0	0	0	4.4353	10.054	7.0933	0	0	15.979	13.08	9.7149	2.919	6.8264	0.11911	0	8.0221	3.4642	1.8528	6.0517	2.1146	0	0	29.683	0	15.39	5.3629	0	16.504	16.05
0.75016	0	0	0	0.95439	0	0	2.7109	0.33704	3.515	0.091596	0	3.7598	0	0	0	0	0	7.1337	3.8021	4.4155	0	2.0106	13.171	11.456	0.14187	1.8759	6.0262	0	0.47604	6.971	0	4.7791	2.0675	1.9515	0.65808	0	28.679	3.7616	14.132	3.7053	0	16.979	14.229
0	0	0	0	1.653	0	0	3.4648	0	2.7439	1.9259	0	3.9453	0	0	0.46915	0	0	4.547	5.1331	3.2927	0	0.94868	10.775	12.263	4.5477	2.3665	7.0403	0	0	6.304	0	0.50175	3.8827	1.5467	0.60355	0.82708	30.469	0	13.854	3.4235	0	16.1	14.284
0	0	0.63519	0	1.0488	0.62643	0	2.4059	0.32479	1.8256	1.1162	0	3.564	0	0	0	0	0	4.3844	5.6081	4.1621	0	0	11.165	13.467	6.8003	1.9499	11.333	0	0.80051	9.6715	0	3.5491	6.3199	0	0.057204	0	31.101	0	13.755	5.7498	0	24.002	13.925
1.6375	0	0	0	1.3946	0	0	3.8923	0	2.8383	0	0	3.4952	0	0	0	0.29737	0	6.8529	4.0918	3.6214	0	0	9.8442	12.063	4.4811	2.6761	8.7279	0	0	7.2107	1.6774	4.3097	5.4366	0	0	0	30.272	0	12.623	6.3607	0	18.175	16.095
0.48255	0	0	0	1.3696	0	0	2.552	0	3.4784	1.3719	0	3.524	0	0	0	0	0	4.6993	6.835	1.9678	0	1.7756	11.851	14.122	5.9681	1.2874	8.8532	0	0	8.6994	0.060108	7.5751	4.2039	0	0	0	32.044	0	11.076	4.4805	0	18.372	12.826
0.12817	0	0	0	1.8056	0	0	3.1885	0	3.652	1.4939	0	2.8696	0	0	0.66808	0	0	5.4505	3.8304	1.4543	0	1.8374	9.1756	13.087	3.6998	0	5.8202	0	0.17484	3.3977	0	4.7249	3.4748	0	2.5611	0	30.982	0	10.781	4.6731	0	10.6	13.197
1.606	0	0.10851	0	2.0561	0	0	3.0812	0	2.8243	1.0526	0	3.001	0	0	0	0	0.30673	4.1615	0.85799	1.144	0	0.29783	7.1086	7.1774	5.2301	0	7.0758	0.032661	6.1308	5.8603	0	1.6257	3.2442	0.59795	2.4705	0.73438	30.194	0	11.588	6.9362	0	13.129	9.9958
2.3899	0	0	0	0.83329	0	0	3.2204	0	0.77604	1.9759	0	2.3256	0	0	0	0	0	7.0964	4.0881	0	0	2.523	5.2114	10.017	2.4281	0	6.2708	0	0	5.2641	0.086112	4.8132	3.1223	0	0	0.40412	29.364	0	11.114	5.4024	0	12.264	12.957
3.8822	0	0	0	1.9386	1.3792	0	2.875	0	1.6823	0.98429	0.19251	2.1443	0	0	0	0	0	5.3092	5.3388	0	0	3.3455	4.7058	11.913	7.552	0	7.1337	0	6.0092	8.395	0	1.7346	3.1724	0	0.95673	0	30.139	0	8.4363	5.3127	0	10.822	11.187
2.9707	0	0.39953	0	1.4432	0	0	1.4672	0	1.2348	2.2064	0	1.7195	0	0	0	0	0	6.607	4.2593	0	0	0.59539	3.9393	13.884	3.8118	0	9.4532	0	0.38372	13.673	2.5967	1.5119	1.1964	0	0	0.34314	32.231	0	8.325	4.4309	0	12.702	12.481
3.947	0	0.07446	0	1.0873	0	0	0.99539	0	0.029915	1.1734	0	2.0583	0	0	0	0	0	6.4966	6.3154	0	0	7.4697	4.1308	9.2734	7.8258	0	8.4167	0	0.58983	14.022	3.5208	2.484	6.1671	0	0	0	32.575	0	8.5231	4.652	0	10.369	11.821
3.948	0	0	0	0.84375	0	0	3.4294	0	0.63039	0.0030105	0.87762	1.9982	0	0	0	0	0	4.9197	0.81489	0	0	5.729	2.9296	13.384	6.1557	0	6.5749	0	2.4707	17.853	0.90357	2.6166	2.9299	0	0.058886	0	30.943	0	6.8093	3.7026	0	11.071	12.113
2.6648	0	0	0	3.0241	0	0.93479	2.1833	0	0.15025	2.6355	0	1.7823	0	0	1.4265	0	2.1928	4.4047	8.6245	0	0	8.7121	0.14727	12.543	9.9802	0	6.2771	0	1.7089	15.433	2.8897	0	2.0143	0	0	0	34.288	0	6.7602	3.4967	0	13.588	10.254
2.9093	0	0.2971	0	2.671	0	0	0.80758	0	0	1.2964	0	1.6041	0	0	0	0	0.20431	5.375	5.9992	0.41797	0	9.8421	2.5323	13.173	4.3809	0	8.6462	0	0	13.813	0.59255	1.0678	3.8523	0	0	0	35.213	0	5.6537	5.2982	0	19.355	10.106
2.4113	0	0.59707	0	2.3552	0	1.2216	1.982	0	0	2.8599	0	1.604	0	0	0	0	0	6.207	6.9036	1.6703	0	5.3895	4.1886	11.339	3.0932	0	7.9438	0	0	9.952	2.0203	0	1.8041	0	0	1.0564	35.04	0.4374	5.451	5.9359	0	23.006	10.574
2.7209	0	0	0	2.8574	0	0	1.5707	0	2.1954	1.064	0	1.7859	0	0	0.90245	0	0	4.1225	4.3861	4.2561	0	6.4694	2.8325	9.8155	6.6976	1.0092	8.7376	0.021441	3.7895	14.194	0.23787	0.53408	3.0335	0.97521	0.87604	0	33.302	0.091922	6.2844	3.0102	0	23.628	13.194
2.1653	0	0	0	1.6344	0	0.37685	3.6917	0	0.71072	1.6356	1.0873	1.3597	0	0	0	0	0	6.9971	8.6075	7.9956	0	3.9832	3.7961	12.269	1.3722	2.5542	6.8717	5.6628	1.3925	8.7843	0	0.10418	5.7563	3.2884	0.82689	0	34.881	5.4123	7.5979	5.7795	0	19.715	13.652
2.1956	0	0	0	2.9868	0	0.433	2.1387	0	1.7434	0	1.6139	1.3421	0	0	0	0	3.6069	6.429	5.5312	8.4088	0	5.863	2.5818	7.4459	1.0401	1.1373	5.6466	0.56022	0.38026	13.288	4.4612	1.0533	5.8397	3.0691	0	0	35.538	6.9206	6.2062	1.9615	0	22.385	11.834
2.209	0	0	0	1.9077	0	0	3.9118	0.53326	3.1927	1.1716	0.98939	1.4396	0	0	0	0	3.3073	4.5108	4.9312	6.8919	0	5.1872	2.2872	7.8545	4.6025	1.4394	8.2202	1.5326	5.1829	13.069	0	1.6391	6.2769	3.4142	2.6299	0.75784	34.238	8.8939	7.1527	0.93908	0	17.113	12.984
1.9705	0	0	0	1.0922	0	0.59464	1.5902	0	2.4832	3.0879	1.7847	1.7819	0	0	0	0	0	5.7015	7.7346	4.2637	0	6.2445	0.76682	7.8758	4.9962	1.2324	5.8312	1.8229	0	10.437	0	0	5.2882	4.7156	0.51989	0.54401	32.721	0	7.7673	5.3685	0	12.654	10.221
2.662	0	0	0	0.72652	0	1.0603	3.5046	0.005472	2.0498	2.3127	1.3072	1.7009	0	0	0	0	0	5.2368	11.156	6.6568	0	6.7762	2.7966	10.328	5.9643	0.90352	6.7979	0.40653	0.92964	5.0385	2.1329	3.0052	1.2349	5.0623	1.0413	0	35.437	0	7.8212	4.8372	0	13.614	13.266
1.9267	0	0.14282	0	1.6416	0	0	1.8939	0	4.9271	2.9017	0	1.2247	0	0	0	0	0	2.6713	7.6848	6.3153	0	2.6088	3.6302	8.2227	2.8491	1.1282	6.2141	0	0	8.6255	2.3644	1.9244	3.6251	5.6599	3.2721	0.84147	40.763	1.1012	6.6126	2.0842	0	15.121	13.061
1.8528	0	0	0	2.0494	0.12593	0	5.116	0	14.536	3.0848	0	0.85705	0	0	0	0	0.88219	5.5665	5.165	6.1237	0	3.0185	1.1208	8.5318	0.73116	0.042318	4.5302	1.5601	0	5.476	0.52605	0	3.8762	3.7448	0	0.74433	41.664	1.8596	5.5788	2.7886	0	12.296	12.954
1.9357	0	0	0	2.6179	0	2.2258	3.9792	0.036119	22.241	2.1234	1.9818	0.85941	0	0	0	0	0	3.7282	7.5026	6.4376	0	5.7431	2.2922	9.6795	0	0	4.4311	0	1.7789	11.594	3.0425	0	6.0346	2.2955	1.3893	2.7522	44.77	9.5961	3.9737	2.9485	0	14.8	8.4919
1.1955	0	0	0	2.0885	0	0	6.8361	0	25.162	2.3981	1.6245	0.60979	0	0	0	0	0	5.9184	1.6038	4.6269	0	0.81807	2.3467	8.4223	0	0	7.9574	2.4364	0	9.6669	0	0	6.1684	0.90524	0	0.68982	43.168	4.9888	4.4084	0	0	10.421	8.1528
1.8564	0	0.11003	0	2.5609	0	1.9448	2.731	0	23.731	0.52201	0.24845	0.67054	0.31826	0	0	0	0	3.6631	1.7445	3.6203	0	0.61426	4.251	10.854	3.0234	0	10.329	0	1.1541	6.2899	0	0	4.3346	1.1616	0	0	44.573	6.5113	5.2653	0.45281	0	11.267	5.9716
1.483	0	0	0	2.0692	0	0	4.7337	0	23.563	0	0.94339	0.44524	0	0	0	0	0	3.123	3.6328	4.0428	0	4.7017	1.6979	10.539	4.3399	0	6.9641	0	0.97681	11.26	2.0891	0	4.3155	0	0	1.0841	48.845	5.9449	3.438	0	0	11.418	7.8098
0	0	0.58267	0	1.6196	1.2501	0	3.4481	0	22.212	0	2.4455	0.32423	0	0	0	0	0	4.6994	1.4929	3.4416	0	3.5899	3.8795	11.663	1.0706	0	7.785	0	1.3797	13.054	1.2675	0	5.3927	0.1501	0	0.10592	47.803	8.6233	3.1592	0.14395	0	7.8616	8.2884
0.70875	0	0	0	2.093	0	0	1.6837	0	21.721	1.6221	0	0.94354	0	0	0	0	0	3.3855	1.0841	2.9842	0	5.8828	1.0707	12.441	0	0	5.8793	0	0	11.336	3.4906	0	6.1036	0	0	0.059504	45.743	6.2423	3.8409	1.1234	0	6.9283	8.7474
0	0	0	0	1.2197	0	0	5.6188	0	19.353	0.23104	0.82054	0.21377	0	0	0	0	0	5.1385	0.59046	3.0908	0	10.022	2.6141	10.327	1.269	0	9.0077	1.1857	0	9.9041	3.3782	0	4.4739	0	0	1.3347	46.269	6.2511	2.7384	0.47389	0	11.021	8.3696
0.69084	0	0	0	3.0673	0	0	5.8177	0	26.167	1.092	2.6646	0.85078	0	0	0	0	0	4.1126	3.783	3.1375	0	8.5922	3.8018	9.7476	3.5834	0	5.1927	0	0	11.584	0	0	8.1897	0	0	0	49.071	10.254	4.1974	0	0	12.759	5.6823
1.091	0	0	0.30484	1.0089	0.26581	0	5.328	0.81982	32.328	2.5556	3.4492	0.064066	0	0	0	0	0	4.3541	4.4785	3.6103	0	7.5327	0.30509	9.5504	0	0	10.529	8.6252	0	7.9292	0	0	6.7249	1.431	0	0	46.321	3.3185	2.5632	0	0	7.8583	6.3351
1.1208	0	0	0	1.8861	2.8684	0.36456	6.2253	0.093435	41.329	0	5.0331	0.72946	0	0	0.10349	0	0	0.90417	1.1468	5.3979	0	10.47	2.2732	8.7013	0	0	12.553	1.2482	0	13.153	0	0	3.4647	3.2148	0	0	51.189	10.677	4.0035	0	0	10.933	6.3931
1.0817	0	0	0	2.1389	0	0	8.6335	0	48.311	2.6625	4.9747	0.7453	0	0	0	0.69448	0	4.6146	3.0428	3.2129	0	9.9482	3.5259	10.798	1.0932	0	11.923	0	0	6.4093	0	0	5.4323	2.7324	0	1.4745	49.76	9.5045	3.5844	0	0	12.083	6.5987
0.38599	0	0	0	2.7487	0	1.8359	10.702	1.582	58.177	2.6466	6.3107	0.86637	0	0	0.37656	0	0	1.5592	3.1721	1.3821	0	10.349	0.9584	6.5664	0	0	12.61	6.7494	0.20196	3.8001	0	0	4.2316	3.8644	0	0	47.034	5.3232	1.7496	0	0	7.9539	5.4387
1.0679	0	0	0	3.311	0.53147	1.9487	15.327	0.70048	74.707	2.6041	7.1836	0.50244	0	0	0	0	0	3.6018	6.21	1.1454	0	6.405	2.5622	7.5499	0	0.72804	13.974	11.973	2.2923	4.6993	0	0	4.2846	4.2801	0	0.22651	45.048	12.567	0	0	0	10.055	0.95669
1.1112	0	1.0175	0	4.1344	2.341	0	14.972	1.2611	83.695	2.39	7.6004	0.57544	0	0	0	0.27981	0	2.3906	5.9068	1.4487	0	9.5729	2.2706	9.1811	0	1.3053	16.247	3.2681	0	6.4896	0	0	5.1162	1.3634	0	0	45.643	11.258	1.975	0	0	13.58	1.9384
0.99087	0	1.0026	0.045514	1.6311	0	0	14.631	0	84.303	4.3922	6.1973	0.97243	0	0	0	0.69783	0	2.3168	3.0833	2.5522	0	10.288	2.5895	10.451	0	0.92653	16.508	1.2992	0.20484	4.0989	0	0	7.5637	2.0807	0	0	48.891	7.0868	2.342	0	0	12.096	3.1469
1.2853	0	1.9444	0	2.4161	2.0926	2.6207	16.364	0.22433	87.182	4.2841	6.019	0.39083	0	0	0	1.1627	0	3.1217	8.444	0	0	14.157	0.65958	7.3485	0	1.4086	18.083	3.2807	0.24523	7.2598	0	0	6.9639	1.8366	0	0.75954	48.116	8.7144	3.0236	0	0	11.571	5.1325
1.1744	0	0.26457	0	2.968	1.5899	0.83753	13.9	0	81.88	2.292	4.5407	0.17266	0	0	0	1.2756	0	3.5658	8.8077	0.22417	0	37.819	0	8.786	0	1.0746	18.131	6.6221	0	4.6289	0	0	4.9894	2.1305	0	0	48.611	8.319	1.8306	0	0	9.4705	4.5552
1.2257	0	0.401	0	2.6226	0	2.2502	14.232	0	81.367	2.3353	4.4156	0.6776	0	0	0	2.5587	0	1.8462	7.2174	0.093883	0	46.371	0.17091	8.4244	0	1.4502	20.73	5.2515	0	5.2727	1.8224	0	9.1525	0.95342	0	0	49.334	5.6749	2.6454	0	0	10.282	3.6527
1.3856	0	1.2647	0	3.1179	0.51137	1.3874	16.896	1.2367	88.758	3.2246	4.5671	0.88011	0	0	0	2.8725	0	1.6263	7.988	0	0	43.18	0	7.1188	0	1.8697	22.003	2.6189	0	4.1729	0	0	8.5696	1.3246	0	0	48.917	6.4726	1.5375	0	0	5.929	2.8994
1.6442	0	0.23991	0	3.0746	0.74705	0	16.724	0	91.224	3.8091	5.5101	0.71643	0	0	1.1853	4.3448	0	1.3876	8.5232	0.27368	0	41.676	0	6.4099	0	0.5464	22.053	4.6039	0	6.9395	0	0	5.795	2.3311	0	0	50.199	11.408	2.2652	0	0	8.2406	3.1361
1.7022	0	0	0	2.1821	0	0	15.585	0.58141	93.071	3.7193	5.8751	0.043214	0	0	0	3.9117	0	0	7.5759	0.29525	0	43.233	1.014	6.939	0	1.3868	23.11	2.7987	0	1.9961	0	0	4.5321	1.0652	0	0	51.085	6.5087	0.39512	0	0	7.1553	1.0629
1.3757	0	0.50552	0	1.7972	0	0	15.366	0.88357	89.658	3.2669	3.37	0.46134	0	0	0	4.8543	0	1.1252	8.0718	0.29544	0	35.59	0	8.2574	0	0.52175	21.079	1.9795	0	8.8286	0	0	6.983	1.9227	0	0	46.376	9.3367	0	0	0	3.6299	3.3966
2.0275	0	0	0	2.2588	0	0	17.376	0.78873	88.842	2.7437	4.4196	0.071514	0	0	0	4.0116	0	2.25	6.0851	0.019297	0	28.947	0.87403	9.8874	0	1.0157	23.068	6.7788	0	3.5185	0	0	5.1975	1.7745	0	0	47.174	6.3609	0.033529	0	0	4.3083	2.0858
1.8791	0	0.027626	0	1.3872	0.062284	0	20.927	0	88.084	3.8174	4.0102	0	0	0	0	3.5583	0	0.75518	5.5507	0	0	28.371	0	8.4508	0	0	21.323	3.4585	0	2.7606	0	0	5.1098	1.0076	0	0	47.73	3.8637	0	0	0	3.0449	0.47529
1.2389	0	0	0	3.2725	0.23825	0.17987	18.683	0	91.189	2.5405	2.9763	0.14545	0	0	0	3.6367	0	0.64036	5.7217	0.095525	0	22.317	0.30235	5.245	0	1.0746	21.743	2.3077	0	4.7851	0	0	5.2497	0.78583	0	0	48.8	5.9901	0	0	0	1.8523	3.5518
0.98523	0	0.18822	0	2.1403	0.46702	0.33034	17.888	1.1091	91.627	3.4634	0.65883	0	0	0	0	4.4954	0	0	5.2347	0	0	22.774	0	6.2645	0	0	23.447	4.2897	0	4.1157	0	0	5.059	2.645	0	0	46.318	5.5568	0	0	0	2.1665	2.4677
0.99101	0	0	0	1.4796	1.5808	0	15.516	0	85.58	2.196	2.1867	0	0	0	0	4.5329	0	0	4.512	0	0	18.639	0	7.1494	0	0	22.048	5.5501	0	3.4616	0	0	2.8324	2.6986	0	0	47.617	2.5303	0	0	0	2.6694	1.257
1.7704	0	0	0	1.6163	0.44958	0.9388	16.706	0	82.14	1.4733	2.5022	0	0	0	0	3.5379	0	0.75541	4.7782	0	0	20.496	0	6.1194	0	0.087319	20.391	6.5732	0	3.2994	0	0	2.8651	3.4734	0	0	45.244	0	0	0	0	3.6081	5.8485
0.80514	0	0	0	1.0017	0	0	14.576	0.32516	81.137	1.4409	0.10904	0	0	0	0	5.0478	0	1.6049	5.4548	0	0	20.758	0	8.8328	0	0.53628	21.897	6.2949	0	7.1606	0	0	3.0702	4.1001	0	0	47.824	0	0	0	0	0.58566	4.9938
1.3698	0	0	0	1.7502	0	0.17329	13.313	0.15443	81.303	2.2028	0	0	0	0	0	5.5775	0	0.75755	4.9174	0	0	17.894	0	5.2885	0	0	21.585	4.7673	0	1.9126	0	0	2.6067	3.783	0	0	48.248	0	0	0	0	3.7626	4.815
0	0	0	0	0.51438	0	1.001	12.655	0.59172	74.9	1.019	0.5419	0	0	0	0	4.6384	0	0.35509	5.1775	0	0	16.702	0	6.9922	0	0	20.174	2.2923	0	8.0173	0	0	1.1904	3.3572	0	0	46.799	0	0	0	0	0.38703	2.8963
0.78197	0	0	0	0.24751	1.9978	0	7.4439	1.3791	70.787	2.3154	0	0	0	0	0	5.0399	0	1.866	0.96957	0	0	16.069	0	5.5216	0	0	20.434	5.0324	0	5.2833	0	0	0.45969	1.6217	0	0	46.197	0	0	0	0	2.3015	4.4411
0	0	0	0	0.55369	1.2309	0	11.046	0.52517	65.452	0.53869	0	0	0	0	0	3.7349	0	4.5121	1.9286	0	0	13.807	0	7.7566	0	0	17.914	2.8923	0	5.6356	0	1.0176	2.4783	1.1273	0	0	47.087	0	0	0	0	5.5041	4.3427
0.15815	0	0	0	0	0	2.5366	7.2339	0	61.762	0.91951	0	0.0083583	0	0	0	2.8106	0	0	3.0016	0	0	15.377	0	9.9554	0.32086	0	18.908	2.1977	0	9.6946	0	0	2.1768	0.66345	0	0	48.392	0	0	0	0	6.4145	5.8903
0.0089965	0	0	0	1.1363	1.6092	1.0706	9.0745	0	57.036	0.90644	0.061146	0	0	0	0	3.7105	0	2.9667	6.3233	0	0	12.668	0	7.4972	0	0	16.552	8.0644	0	5.8124	0	0	0.8252	1.2349	0	0	47.193	0	0	0	0	2.8277	4.8019
0.6633	0	0	0	0	0.71601	0.9369	6.2305	0.83002	53.693	1.4016	0	0	0	0	0	2.4117	0	0.81565	4.7529	0	0	8.5022	0	5.9046	0.51576	0	17.44	0.87224	0	7.5346	0	0	1.1942	0	0	0	45.632	0	0	0	0	3.5977	6.3526
0	0	0	0	0	1.0019	0	4.739	0.69102	52.181	1.8548	0	0	0	0	0	2.6705	0	0.19367	4.4254	0	0	9.3409	0.043898	5.8904	0	0	17.289	4.1363	0	6.7972	0	0	2.6347	0	0	0	45.108	0	0	0	0	1.7072	6.9384
0	0	0	0	1.2297	0	0	5.784	0	48.533	1.066	0	0	0	0	0	4.3099	0	0.35384	4.187	0	0	6.5737	0	8.8638	0	0	16.376	0.32199	0	10.248	0	0	2.2862	0	0	0	45.884	0.80568	0	0	0	0.76855	3.9773
0	0	0	0	0	0	0	5.415	0	47.543	2.0043	0	0	0	0	0	3.127	0	1.181	5.7912	0	0	3.9258	0	8.618	0	0	20.424	0	0	7.3076	0	0	2.4528	0	0	0	47.245	0.63684	0	0	0	2.0609	7.6182
0	0	0	0	0	0	0.055716	3.5556	0	44.652	0.63595	0	0	0	0	0	3.3554	0	1.8317	6.6026	0	0	1.5148	0	8.8751	0.57079	0	19.974	0	0	7.0123	0	0	4.3588	0	0	0	47.734	0	0	0	0	0.67449	6.0418
0	0	0	0	0.99023	0	0.96454	5.1311	0	45.609	2.9178	0	0	0	0	0	2.4367	0	1.5544	8.2051	0	0	3.7029	0	10.404	0	0	18.884	0	0	10.87	0.43568	0	0.88221	0	0	0.17812	49.44	0	0	0	0	0	3.9206
0	0	0	0	2.522	0	1.1662	5.5697	0	43.805	1.8214	0	0	0	0	0	1.293	0	2.4361	6.8612	0	0	1.4035	0	10.916	4.0685	0	17.747	3.1182	0	6.4857	0	0	0.53608	0	0	0	50.762	0	0	0	0	1.4399	4.2008
0.75267	0	0	0.099073	1.9714	0	1.0265	2.6294	0	42.22	1.2843	0	0	0	0	0	2.3423	0	2.3977	6.9223	0	0	2.4409	0	11.153	2.0432	0	18.091	0.80265	0	10.318	0	0	3.3767	0	0	0	50.783	0.69016	0	0	0	7.0037	5.3274
0.43399	0	0	0	1.9589	0.84299	3.5214	3.2897	0	38.132	1.1363	0	0	0	0	0	3.4465	0	2.5438	4.5258	0	0	5.372	0	12.445	3.146	0	17.372	0	0	11.262	0	0	4.7376	0	0	0	51.571	1.0202	0	0	0	8.3189	2.254
0.31634	0	0	0	1.6531	3.0099	1.7581	4.8958	0	35.731	1.4381	0	0	0	0	0	1.381	0	2.211	0.78737	0	0	6.6102	0	10.22	0.86907	0	17.526	0	0	13.276	0	0	4.7194	0	0	0	52.24	0	0	0.061129	0	5.5534	5.9459
1.6378	0	0	0	2.0275	0	3.2281	3.4476	0	31.788	1.4819	0	0	0	0	0	1.7287	0	1.9978	6.9956	0	0	7.6778	0	10.766	0	0	15.889	0	1.1942	15.653	0	0	1.8242	0	0	0	52.571	0.79679	0	0	0	8.2496	7.804
0.90485	0	0	0	2.1925	1.9363	0.54135	5.5106	0	30.521	1.097	0	0	0	0	0	0.93794	0	3.7617	5.4731	0	0	5.6727	0	12.368	3.8774	0	14.473	0	2.9616	9.5343	0	0	4.1435	0	0	0	52.368	0	0	0	0	7.063	7.9205
2.2285	0	0.16562	0	1.5774	0	0.97417	7.4984	0	26.988	2.7298	0	0	0	0	0	1.4846	0	4.5584	2.9769	0	0	4.188	0	9.3236	6.942	0	15.88	0	0	15.017	0	0	0.72271	0	0	0	53.174	0	0	0	0	11.911	10.567
2.1666	0	0	0	2.3675	0	0.53474	9.5257	0	24.696	2.1953	0	0	0	0	0.23588	1.1936	0	3.1172	5.0427	0	0	3.2482	2.263	12.929	4.9398	0	13.667	0	0	18.339	0	0	3.9633	0	0	0	56.098	0	0	0.81509	0	15.922	8.1875
2.9394	0	0	0	2.1151	0	0.16978	6.2964	0	22.102	1.9241	0	0	0	0	0	2.0932	0	4.1683	5.4051	0	0	5.03	1.5922	10.858	4.6027	0	11.912	0	3.4569	19.662	0	0	3.5862	0	0	0	55.698	0	0	0	0	11.815	9.2371
2.1454	0	0	0	1.2438	1.4474	0.63474	6.3945	0	19.993	1.7922	0	0	1.8036	0	0	1.2448	0	3.1161	4.8384	0	0	4.4193	0	11.91	4.4416	0.21507	13.575	0	4.6609	16.781	0	0	2.9846	0	0	0	54.958	0.02814	0	0	0	11.698	11.706
2.7127	0	0	0	1.5327	1.7614	2.5502	7.3432	0	18.595	1.9652	0	0	2.4508	0	0	0.94612	0	4.0033	3.1681	0	0	5.0958	1.4671	12.394	3.461	0.7341	12.026	0.69394	3.9832	17.173	0	0	3.4051	0	0	0	53.234	1.1808	0	0	0	13.852	12.342
1.758	0	0	0	1.6285	0	0	7.3506	0	17.296	0.56812	0	0	2.4805	0	0	0.71267	0	5.3702	1.3924	0	0	2.6451	0.57154	13.042	4.7568	0.021035	12.548	0	2.8103	20.076	0	0	4.6347	0	0	0	55.611	1.5526	0	0	0	12.653	15.394
1.4167	0	0	0	1.7548	0	0	4.5136	0	15.853	1.4464	0	0	3.1491	0	0	1.504	0	3.7101	2.8421	0	0	1.7579	0.23352	10.604	2.2093	0.94374	12.446	2.2009	4.1231	17.038	0	0	4.1286	0	0	0	55.675	4.893	0	0	0	14.952	15.448
2.4812	0	0.17767	0	2.8178	0	0	6.9412	0	12.845	3.9923	0	0	2.7361	0	0	0	0	5.0382	5.3122	0	0	2.206	0	11.101	9.3622	0	13.26	0.73313	4.4379	18.181	0	0	5.5028	0	0	0	54.024	0	0	0	0	12.414	13
1.0611	0	0	0	2.2599	0	1.9302	7.188	0	11.851	2.6281	0	0	1.2972	0	0	0	0	3.7803	7.5666	0	0	4.2612	1	12.93	5.8891	0.38579	12.88	0	3.2305	17.416	0	0	7.7342	0	0	0	54.672	0	0	0	0	10.589	15.508
1.8207	0.21084	1.641	0	2.848	0	2.0146	8.9241	0	12.896	2.2243	0	0	1.7943	0	0.46026	0.96801	0	8.0585	6.5542	0	0	4.8009	0	11.776	7.1013	0.20087	11.758	0	9.8685	17.299	0	0	4.1723	0	0	0.97502	53.086	0.65856	0	0.42383	0	18.945	12.268
1.0939	0	0.88711	0	1.3502	0.0017699	0.41677	8.443	0	8.8508	0.15639	0	0	0.56696	0	0	0	0.87462	4.4006	1.6844	0	0	9.5738	0	18.492	5.776	0.32629	11.682	1.411	3.2998	12.2	0	0	5.6022	0	0	0	53.327	3.7663	0	3.3498	0	14.115	13.983
1.5593	0	1.2568	0	0.84326	1.7009	4.1926	10.402	0	9.2789	1.664	0	0	1.4242	0	0.75374	1.9365	3.3248	3.2684	5.1552	0	0	11.945	0	22.603	8.8911	0.58852	12.224	1.6005	9.1375	16.875	0.56698	0	2.1936	0	0	0	53.61	0	0	3.4484	0	15.205	8.0037
2.2269	0.0021342	1.1851	0	2.4687	0	2.3837	13.762	0	8.4781	1.0451	0	0	2.1012	0	1.2573	1.1683	0.63478	5.0198	6.0269	0	0	14.597	0	22.132	7.328	0.061621	14.955	0	9.4298	16.975	0	0	4.5891	0	0	0	54.471	0	0	4.5893	0	19.857	13.738
1.7399	0	0.91208	0	2.4377	1.7953	3.5515	14.826	0	7.3067	1.9705	0	0	0	0	2.4849	2.179	1.0058	3.7998	6.0018	0	0	13.223	6.2997	22.989	12.225	1.1596	16.523	0	25.46	17.287	0.67525	0	7.9503	0	0	0	57.316	1.5736	0	2.3974	0	20.491	10.418
1.4919	0	1.3619	0	0.41753	0	3.9186	14.627	0	5.8095	2.7691	0.32296	0	0.16632	0.45958	0	0	0	7.1019	9.0165	0	0	15.895	5.5209	29.266	9.4929	0.71601	13.59	0	29.314	11.796	0	0	3.9627	0	0	1.2184	56.027	1.3324	0	4.328	0	23.301	7.1876
1.2085	0	1.2805	0	2.341	0	3.3295	15.589	0	5.9274	1.9091	0	0	0.45316	0	0	0	1.7032	4.6411	6.5239	0	0	17.251	10.944	30.163	6.1712	0	14.311	2.8603	35.438	7.5744	0	0	2.4298	0	0	0.50567	55.541	0.21031	0	2.6449	0	25.098	8.4487
1.7178	0	0.50054	0	5.2023	0	2.6698	16.751	0	5.276	2.0866	0	0	0.35776	0	0	0	0	2.5455	3.703	0	0	20.139	13.705	28.753	7.4749	1.6684	18.014	0	44.997	16.364	0	0	3.2659	0	0	0	57.239	0	0	7.5776	0	32.026	11.618
2.0436	0	0	0	5.3928	1.846	4.9598	16.092	0	4.9874	2.6327	0	0	0.46938	0	0	0.80023	0	5.1881	6.6253	0	0	16.401	22.359	26.393	8.9094	0.6386	18.504	0	52.155	18.633	0	0	2.5631	0	0.052213	0	57.563	0	0	4.7268	0	32.824	13.107
1.9473	0	0.29286	0	7.6953	1.1323	0.73198	18.303	0	4.9348	1.6904	0	0	0	0	0	1.2916	1.287	3.6159	4.9328	0	0	14.6	33.682	26.723	2.9557	0	18.179	0	55.658	14.267	0	0	2.5004	0	0	0	55.904	0	0	7.2816	0	29.754	10.289
1.9926	0	1.6853	0	7.36	0.028828	2.165	17.149	0	5.4366	0.24523	0	0.055946	0	0	0	2.8851	0.13962	4.9952	3.8838	0	0	14.238	40.093	20.238	10.014	0	18.912	0	56.569	11.959	0	0	1.2041	0	0	0	53.869	0	0	6.3356	0	21.116	10.345
2.6072	0	1.7354	0	8.2099	0	1.3535	18.278	0	1.5694	3.2795	0	0	1.2264	0	1.0852	2.8318	0	3.2031	11.021	0	0	13.681	43.594	17.339	11.6	0	17.222	0	53.079	11.845	0	0	1.1704	0	0	0	52.524	0	0	4.3206	0	19.598	11.861
2.6628	0	0.48829	0	6.5988	0	0.018601	19.767	0	2.3913	4.0856	0	0	0.53092	0	0	0.39936	0	3.5404	6.7802	0	0	11.962	44.685	16.796	7.9894	0	17.406	0	60.347	13.426	0	0	1.3118	0	0	0.43904	52.327	0	0	0	0	19.695	10.391
2.264	0	0.5736	0	8.5732	0	2.6219	21.101	0	5.0394	2.5335	0	0	1.144	0	1.8497	2.1031	0	2.9762	4.4839	0	0	13.378	46.198	15.783	9.9062	0.1401	18.409	0	55.828	12.544	0	0	3.0803	0	0	0.91206	54.714	0	0	3.6701	0	17.709	11.191
2.5443	0	0.22291	0	8.9645	0	2.2021	20.113	0	6.0035	0.79046	0	0.025121	0.64941	0	0	2.0337	0	0.1719	7.4339	0	0	11.509	48.279	19.88	4.4225	1.5518	16.411	0	55.809	9.5363	0	0	0.6461	0	0	0	56.337	0	0	8.4316	0	14.977	12.672
1.9482	0	1.4667	0	10.613	0	2.5991	20.173	0	5.6526	3.0839	0	0	0	0	0	1.6996	0.16334	3.5857	4.9879	0	0	8.436	54.668	14.686	8.0817	0.86174	17.296	0	52.861	12.421	0	0	2.506	0	0	0.43462	54.859	0.59932	0	6.3556	0	20.532	10.027
1.8958	0	0	0	9.9891	0.49563	4.8841	19.21	0	3.4817	2.152	0	0.36726	0	0	0.51563	1.5473	0	0	5.1565	0	0	4.3957	51.93	14.194	3.6695	1.8754	16.951	0	57.688	17.355	0	0	1.5894	0	0	0	53.846	0	0	6.7943	0	12.647	10.934
2.2362	0	0.8432	0	6.984	0	1.5638	20.721	0	4.1741	1.4208	0	0.10663	0	0	0	1.357	0	3.3351	7.3957	0	0	3.1763	49.954	15.063	10.386	1.1997	16.026	0	53.826	16.385	0	0	0	0	0	0	55.412	0	0	2.4711	0	18.78	9.2448
2.8178	0	0.10101	0	8.1812	0	0	18.574	0	2.9434	1.8978	0	0	0	0	0	1.9943	0	2.8222	4.2695	0	0	8.7567	46.339	12.626	5.4751	2.3259	15.948	0	52.957	16.187	0	0	3.4769	0	0	0.90028	55.612	0.88763	0	1.1294	0	12.825	11.152
3.2862	0	0.77124	0	6.7009	0	0.76851	17.027	0	2.9421	2.3764	0	0	1.3422	0	0	2.09	0	1.3294	7.8151	0	0	5.8723	45.98	12.562	6.5463	1.6232	18.567	0	58.48	15.206	0	0	3.2062	0	0	0	53.747	3.3693	0	2.2399	0	13.348	9.6171
2.5517	0	0.83865	0	6.6695	0	0	21.968	0	0.90521	2.2776	0	0.38145	1.5482	0	0	0.34213	0	2.5361	3.6513	0	0	3.7556	44.419	14.704	8.7228	0.90999	15.147	0	65.614	13.88	0	0	3.2782	0	0	0.048	52.302	0	0	0	0	10.183	8.0891
3.2204	0	0	0	7.205	0	0.92286	20.851	0	0.33623	3.0486	0	0	0	0	0	1.0177	0	1.3303	7.0597	0	0	6.9966	41.105	13.499	5.7876	0	18.14	0	55.21	11.555	0	0	2.7373	0	0	0	52.259	0	0	3.7073	0	9.1601	7.8522
2.8563	0	0	0	7.0333	0.48194	2.2903	19.547	0	1.2242	1.6592	0	0.3851	0	0	0	0	0	2.5929	2.7522	0	0	7.184	39.344	17.112	2.8154	1.3849	15.454	0	55.298	15.665	0	0	3.3572	0	0	0	54.258	0	0.58339	4.3847	0	11.468	9.5693
2.944	0	0.31206	0	7.1563	0	0.97705	18.236	0	2.1794	1.8326	0	1.0085	0	0	0	0.39942	4.2288	4.1133	3.5545	0	0	6.658	39.603	15.729	8.9004	1.8954	13.802	0	55.982	21.51	0	0	2.2871	0	0	0	56.674	1.3124	0	0.90124	0	7.3864	9.6267
3.0819	0	0	0	7.8839	0	0	18.124	0	0.0025654	0	0	1.0425	0	0	0	0.39791	0	2.0256	4.0622	0	0	5.5515	42.351	13.407	12.041	1.8563	13.276	0	51.247	17.508	0	0	3.0385	0	0	0	56.933	1.8265	0	2.7503	0	11.546	7.735
2.3477	0	0	0	7.7133	0	0	15.362	0	0.7941	0.89938	0	0.90172	0	0	0	0	1.1553	3.1089	2.5175	0	0	9.8805	45.281	13.75	8.3211	1.2291	12.391	0	43.229	13.659	0	0	3.4465	0	0	0.027055	51.729	1.0645	0	0.5158	0	10.129	8.2907
1.9925	0	0.71835	0	5.997	0	0	13.71	0	1.0875	2.384	0	0.43589	0.41091	0	0	0.89321	0.338	0.017784	0.43387	0	0	4.394	43.729	12.237	5.6462	0.22251	13.164	0	39.689	14.671	0	0	4.1096	0	0	0.57053	54.784	2.6215	0.1834	0	0	10.292	7.5001
2.8168	0	0	0	8.1964	0	0.9332	12.358	0	1.7312	1.0545	0	0.84748	0	0	0	0.71664	0	1.8787	0	0	0	6.2874	41.524	7.9805	13.254	0	10.068	0	35.796	11.134	0	0	1.4855	0	0	0	53.437	0	0	1.113	0	6.9691	9.8968
3.1463	0	0	0	6.8479	0	0.43256	11.968	0	1.1931	1.8926	0	0.53434	5.7582	0	0	0.12941	0	1.976	2.1935	0	0	6.2866	39.233	10.584	6.411	0	12.178	0	24.95	14.333	0	0	3.164	0	0	0	51.765	1.8886	0	0.90909	0	6.6077	9.7942
2.2409	0	0	0	6.6866	0	1.045	9.6355	0	0	1.8472	0	0.70916	9.836	0	0	0.34949	0	2.4192	5.6386	0	0	7.6241	41.08	11.392	1.2356	0	10.425	0	31.144	17.482	0	0	4.313	0	0	0	52.214	1.5678	0	1.4089	0	6.6709	5.4643
1.8881	0	0	0	7.3665	0.21306	0	11.843	0	0	1.3896	0	0.025019	17.287	0	0	0	0	1.8278	3.0733	0	0	8.0702	40.898	13.228	1.7641	0	13.781	0	27.052	16.539	0	0	0	0	0	3.7638	52.332	0	0	4.5267	0	9.116	12.337
1.8946	0	0.35376	0	6.0571	0.57725	0	10.395	0	0	0.63493	0	0.12833	21.349	0	0	0.56186	0	5.0359	3.8968	0	0	9.2837	38.706	11.712	7.1383	0	14.931	0	20.146	17.773	0	0	0	0	0	0	49.154	0	0	5.616	0	6.6311	12.418
2.3321	0	0	0	5.846	0	0.029218	8.4784	2.0991	0	1.2741	0	0.29667	20.196	0	0	2.981	0	3.3682	4.9291	0	0	7.5936	37.946	13.64	9.289	0	14.453	0	21.253	12.876	0	0	0	0	0	0.69078	49.015	0	0	4.6425	0	3.3645	10.508
1.8736	0	1.0714	0	6.2771	0	0	7.8856	4.0997	0	1.6438	0.11416	0.57277	20.542	0	0	1.7459	0	1.2117	4.6769	0	0	6.8136	35.572	10.046	6.6018	0	15.273	0	21.286	13.936	0	0	0	0	0	0.94114	49.668	0	0.29241	5.5972	0	2.2022	11.137
0.80254	0	0	0	6.2859	0	0	9.2402	2.3681	0	1.5467	0	0	21.421	0	0	2.3698	0	1.3472	6.8091	0.17615	0	3.4626	33.751	10.967	7.5286	0	13.012	0	18.7	14.734	0	0	0	0	0	0.63541	51.924	0	0	4.315	0	2.7188	11.597
2.6849	0	0.34646	0	6.3182	0.33763	0.30841	8.0317	0.38966	0	2.4606	0	0	20.613	0	0	0.17187	0	1.8709	4.427	0	0	1.3442	30.417	12.042	7.0952	0	12.9	0	21.654	18.671	0	0	1.9715	0	0	0	52.915	0	0	3.933	0	4.8093	10.491
4.2467	0	0.27816	0	5.9953	0	0	4.8805	1.603	0	1.5498	0	0.063728	21.589	0	0	1.8847	0	2.6795	6.2693	0	0	0	30.208	9.7123	1.818	0	15.138	0	20.744	20.183	0	0	1.2792	0	0	0.074182	46.642	0	0	5.694	0	4.859	11.757
4.1409	0	0	0	5.2355	0	0	5.4885	0.22952	0	0	0	0	21.97	0	0	2.051	3.8933	1.7778	5.492	0	0	2.1553	30.526	10.804	2.9984	0	14.01	0	16.182	19.032	0	0	2.6569	0	0	0	48.814	0	0	3.4511	0	4.1838	10.441
3.2485	0	0	0	5.0307	0	0	4.7161	0	0	2.2106	0	0	22.225	0	0	1.5129	0	1.8504	8.4434	0	0	0.92137	27.769	12.593	3.8446	0	11.138	0.55561	13.598	18.047	0	0	1.9495	0	0	0	51.501	0	0	2.0587	0	4.6435	10.68
4.2608	0	0	0	3.8971	0	0	5.0957	0.079592	0	1.1503	0	0	19.038	0	1.6255	1.5437	0.084096	1.0094	7.6014	0	0	0.93175	26.33	9.1289	0	0	12.623	0.80177	13.776	15.904	0	0	1.2104	0	0	0	47.357	0	0	3.276	0	1.5199	10.038
4.3209	0	0	0	3.9974	0	0	4.9038	1.5501	0.6671	2.263	0	0	19.853	0	0.59334	2.7488	0	3.9575	8.3074	0	0	0	24.164	12.444	1.6992	0	10.635	0.13218	19.696	16.95	0	0	1.392	0	0	0	49.776	0	0	3.4198	0	1.9629	11.781
5.9084	0	0	0	4.5312	2.0568	0.69354	3.0902	0	0	0.62933	0	0	17.975	0	0	0.97175	0	2.7539	7.0564	0.72828	0	2.2103	25.048	11.409	1.6592	0	13.023	0	24.267	18.345	0	0	2.5513	0	0	0	48.145	0.19944	0	2.6199	0	2.0083	8.9499
6.1034	0	0	0	5.6206	0	0.30534	3.7686	0	0	0.76824	0	0	18.604	0	0	0.41389	0	2.0214	5.5372	0.029698	0	0	23.187	11.957	4.4612	0	12.156	0	14.2	15.957	0.34274	0	3.3242	0	0	0	49.415	0	0	1.2805	0	1.1159	7.5846
6.4557	0	0	0	4.4125	0	0	1.8116	0	0	0	0	0	16.968	0	1.1831	0.09215	0	1.7533	4.0945	1.2563	0	0.015397	24.037	8.6547	4.5162	0	8.9201	0	16.899	14.858	0	0	1.7763	0	0	0	49.06	1.2232	0	0.83715	0	0.60641	6.0567
6.6906	0	0	0	5.447	0.25833	0	2.3202	0	0	0	0	0	16.185	0	0	0	0.86952	1.6573	1.8855	0.74345	0	3.8098	22.776	10.917	4.1562	0	9.0718	0	21.857	15.393	0	0	0.54456	0	0	0	47.798	2.9033	0	3.8836	0	0.47607	8.9779
6.7667	0	0	0	5.171	0	0	2.8799	0	0	0	0	0	15.138	0	0	0	0	0.80615	1.8013	0.90909	0	4.9778	23.121	10.444	6.7706	0	9.7228	0	16.599	19.193	0	0	1.3495	0	0	0	49.795	0	0	2.3829	0	0	8.4171
7.097	0	0	0	7.6365	0	1.1386	4.6129	0	0	0	0	0	14.042	0	0	0	0	3.3645	2.6324	0.49667	0	4.318	21.81	13.015	5.44	0	10.554	0	29.331	14.92	0	0	0.83331	0	0	0	47.201	0	0	2.3304	0	0.41131	8.6607
8.3298	0	0	0	3.9362	0	0	1.8604	0	0	0	0	0	13.798	0	0	0	0.26199	4.1867	1.9371	0	0	6.3532	23.348	11.812	6.5436	0	10.246	0	36.372	15.767	0.099754	0	2.8196	0	0	0	51.306	1.6419	0	2.1043	0	1.7944	8.4163
7.6923	0	0.10283	0	5.8985	0	0	0	0	0	1.444	0	0	12.235	0	0	0	1.1867	3.6485	0	0.02135	0	2.9688	25.763	10.218	4.1268	0	8.199	0	44.154	15.545	0	0	3.0939	0	0	0	49.916	2.7757	0	3.6107	0	3.6677	9.2817
7.6074	0	0	0	5.2283	0	0	1.8521	0	0.029498	0.54422	0	0	12.833	0	0	0	3.2532	4.2019	2.6669	0	0	10.495	23.768	8.0775	5.1429	0	7.9183	0	42.391	13.536	0	0	2.9083	0	0	0	49.458	5.7373	0	3.3593	0	5.0269	6.5136
8.6438	0	0.5467	0	5.5011	0.29679	0	0.28605	0	0	0.052682	0	0	18.317	0	0	0	5.6036	3.4565	2.1198	0	0	10.351	24.465	11.434	1.2596	0	9.8112	0	36.158	13.433	3.5996	0	4.7853	0	0	0.20589	50.555	3.9154	0	2.3278	0	6.4314	8.1347
7.8677	0	0.13335	0	5.8275	0	0	3.02	0	0	0.96562	0	0	19.077	0	0	0	0	1.5884	4.2798	0.022992	0	10.446	22.684	10.914	1.0216	0	7.6729	0	35.23	14.594	0	0	3.82	0	0	0	49.764	1.4037	0	3.267	0	5.6066	9.3206
8.2074	0	0	0	5.4218	0.83094	0	1.6277	0	0.48661	1.3492	0	0	18.911	0	0	0	0	3.712	0.90062	1.4006	0	7.1447	27.302	13.009	8.2587	0	9.7065	0	35.429	12.611	1.0478	0	0.1173	0	0	0	49.742	2.3836	0	2.7833	0	4.413	9.8925
6.9304	0	0	0	5.0216	0	0	3.2788	0	0	1.9009	0	0	18.815	0	0	0	0	0.93692	3.2584	0	0	8.6767	27.896	11.749	5.9123	0	9.7118	0	29.901	14.237	0	0	1.9322	0	0	0	46.709	5.6453	0	1.9021	0	3.1249	8.826
6.6314	0	0.14174	0	6.2732	0	0.066683	4.4401	0	0	3.5488	0	0	17.781	0	1.4288	0	3.5383	2.4934	1.1524	0	0	6.7494	25.377	9.6131	2.1396	0	10.217	0	25.584	15.77	2.0821	0	3.576	0	0	0	46.982	6.6105	0	0.88181	0	3.5268	9.3507
6.4828	0	0	0	4.7517	0	0	2.5773	0	0	4.6361	0	0	14.335	0	0	0	4.2407	2.148	0.31175	0	0	3.962	26.546	9.6345	4.8973	0	7.0805	0.6486	29.838	11.985	0	0	2.2465	0	0	0	44.015	3.8693	0	0	0	4.069	5.9184
7.4004	0	0	0	5.1313	0	3.3312	3.1503	0	0	5.2268	0	0	12.942	0	0	0.12003	0.90271	1.8535	1.6899	0	0	6.2701	23.29	9.9242	5.7372	0	8.5717	0	22.133	15.202	0	0	4.3361	0	0	0	46.734	5.1194	0	1.6371	0	3.3434	5.9948
8.4833	0	0.11395	0	5.6481	0	0	3.5585	0	0	4.4325	0	0	11.89	0	0	0	0	2.0662	1.3288	0	0	6.8106	26.291	9.7621	7.1569	0	8.5871	0	20.1	10.727	1.3429	0	3.4053	0	0	0	45.028	6.4054	0	3.2631	0	4.5084	8.7003
7.7117	0	0	0	4.6882	0	0	3.4805	0	0	4.2849	0	0	10.822	0	0	0	4.7842	1.94	0	4.9826	0	0.09335	23.04	12.501	5.5239	0.40011	9.8133	0.21825	14.911	12.366	1.8929	0	4.5344	0.4683	0	0	41.927	10.184	0	0	0	5.5904	8.6884
6.4646	0	0	0	4.7526	0	0	3.7858	0	0	2.839	0	0	9.8026	0	0	0	3.456	2.2766	0	7.3674	0	1.8795	23.542	13.89	6.1127	0.34626	10.731	0	7.7821	10.266	1.6383	0	3.9135	1.6355	0	0	42.115	10.198	0	0	0	1.5363	9.8228
5.9613	0	0	0	5.6992	0	0	3.2716	0	0	2.2888	0	0	7.9394	0	0.22446	0	0	0.85323	0	7.3875	0	1.3414	26.155	13.194	6.5596	0	9.1496	0	9.4284	12.798	0.22594	0	1.3964	1.888	0	0	41.86	5.9283	0	0	0	2.1438	7.7743
6.2208	0	0	0	4.9525	0	0	5.8277	0	0	4.3353	0	0	6.2908	0	0	0	3.8727	2.9886	0	6.4149	0	0	26.208	14.364	4.7757	0	7.8615	0	2.1426	8.2301	1.9857	0	4.0892	2.364	0	0	40.887	6.6743	0	0.79686	0	2.4443	10.192
6.2491	0	0	0	4.732	0	0	0.8252	0	0	3.3662	0	0	5.9469	0	0	0	0	1.784	0	7.0588	0	0	24.14	13.103	0	0.016086	6.79	0	10.494	13.098	3.2383	0	3.051	1.5484	0	0	40.05	10.399	0	0.52566	0	2.5575	10.404
6.2067	0	0	0	4.4973	0	0	2.485	0	0	4.3139	0	0	6.073	0	0	0	2.2614	2.6063	0	8.1247	0	0.056576	21.812	22.548	3.6497	1.0184	6.0769	0	8.0447	12.992	5.0387	0	2.9531	3.6815	0	0	42.105	5.6739	0	0	0	0.77088	12.526
4.7123	0	0	0	4.0074	0	0	1.8423	0	0	2.7943	0	0	4.3797	0	0	0	0	0	0	7.6192	0	0	19.42	24.807	2.5933	0	4.9714	0	4.9405	14.739	0.41607	0	2.0513	2.0594	0	0	39.261	4.7382	0	0	0	5.2083	10.785
4.5513	0	0	0	3.015	0	0	3.2333	0	0	5.4902	0	0	5.4422	0	0	0	0	1.8901	0	7.6371	0	0	19.72	24.66	4.3022	0	6.3978	0	1.9737	11.977	0.25578	0	0.29932	1.1922	0	0	40.052	6.0851	0	0	0	1.4547	11.723
4.6179	0	0	0	3.0901	0	0	2.8868	0	0	5.1292	0	0	4.853	0	0	0	2.9173	2.9892	0	5.4698	0	0	17.694	23.113	0	0.14337	6.3402	0	0	10.343	2.6697	0	1.5337	0.061672	0	0	38.098	1.8502	0	0	0	3.2608	13.226
3.6453	0	0	0	2.8131	0	0.97509	2.4925	0	0	5.1386	0	0	2.2755	0	0	0	0	1.6826	0.14148	7.3975	0	0	15.858	20.393	0	0	6.4087	0	0.88729	12.502	0.74858	0	2.7015	0	0	0	39.406	3.1438	0	0	0	4.2954	11.829
3.6645	0	0	0	3.4342	0	0	3.5128	0	0	4.8563	0	0	4.2795	0	0	0	5.735	1.1502	0	6.5749	0	2.6334	13.582	19.23	2.6572	0	5.9912	0	0.48701	13.294	0	0	1.6126	0.12375	0	0	41.606	5.3808	0	0	0	5.1829	12.372
4.1747	0	0	0	3.2218	0	0	4.0581	0	0	6.101	0	0	3.8912	0	0	0	0	0	1.7823	7.5433	0	0.83139	11.943	19.983	6.1041	0.67675	6.6774	0	5.0587	16.828	3.0403	0	2.7414	0.76567	0	0	40.253	6.9374	0	0.22401	0	5.8386	15.452
3.04	0	0	0	3.4216	0.0052415	0	0	0	0	6.4076	0	0	3.7291	0	0	0	1.3391	0.59584	0	8.4107	0	2.1042	13.854	18.38	0	0.13459	6.1197	0	0	16.731	11.549	0	3.7933	3.5907	0	0	38.957	0.84221	0	0.29539	0	3.6575	13.687
2.9816	0	0	0	4.0986	0	0	0	0	0	5.6665	0	0	2.0012	0	0	0	5.4921	1.1063	0	9.0398	0	0.71214	15.492	17.579	0	0	6.9011	0	0	17.811	9.353	0	2.6261	4.7721	0	0	37.267	3.5426	0	0	0	6.158	14.658
1.7346	0	0	0	3.8554	0	0	0.083291	0	0	4.7113	0	0	1.8017	0	0	0	0	0	0	7.9268	0	1.5033	14.91	20.509	0	0	5.6913	0	0	12.097	12.731	0	2.3272	1.7832	0	0	39.039	3.1486	0	0	0	5.6848	13.272
3.4567	0	0	0	4.5316	0	0	0.13824	0	0	1.9214	0	0	2.4823	0	0	0	3.1229	0.94344	1.6664	6.6404	0	3.489	19.372	16.934	2.7341	0.030687	6.3493	0	0	16.462	6.2153	0	2.1509	1.2683	0	0	39.338	4.148	0	0.71805	0	1.2336	14.429
5.8975	0	0	0	3.9276	1.9635	0	0.63723	0	0	2.2066	0	0	1.876	0	0	0	0	0	0	4.2581	0	0.76847	14.767	14.602	0	0	5.5557	0	0	14.279	8.5847	0	2.9134	1.9072	0	0	39.438	2.1374	0	0	0	4.3009	13.95
5.5945	0	0	0	3.8957	1.3585	0	1.0722	0	0	2.2836	0	0	2.1768	0	0	0	0	1.6442	0	5.0613	0	1.1752	15.666	14.673	0	0	6.7816	0	0	16.702	6.3436	0	3.4522	1.1171	0	0	38.821	2.053	0	0	0	3.799	15.52
5.4976	0	0	0	3.5947	2.4544	0	2.376	0	0	3.3275	0	0	1.5728	0	0	0	1.4491	0	0	5.4702	0	1.9546	12.47	15.315	0	0	6.3688	0	0	11.386	1.7356	0	2.3898	0	0	0	38.97	0	0	0	0	2.0732	13.308
5.0759	0	0	0	0.84962	1.6831	0	5.2915	0	0	7.2396	0	0	2.6252	0	0.93699	0	0.53932	0.81708	0.76405	4.6148	0	6.3114	12.803	17.105	0	0	10.672	0	0	14.883	4.1869	0	2.7603	1.521	0	0	36.898	0.45319	0	1.9453	0	5.647	8.6931
4.5974	0	0	0	2.5688	3.0992	0	7.1897	0	0	10.939	0	0	1.0947	0	0	0	1.7276	0.60329	3.2267	4.0407	0	6.8317	11.362	15.454	0	0	12.716	0	0	8.8713	6.435	0	4.4484	0	0	0	35.602	8.396	0	0.080848	0	4.3753	13.081
4.8682	0	0	0	3.036	3.9203	0	5.8564	0	0	10.489	0	0	2.2405	0	0	0	2.052	0.51765	2.7839	3.0132	0	7.178	9.51	12.706	0.46339	0	12.092	0	0	8.5421	0.73749	0	3.5737	0	0	0	36.774	8.9007	0	0	0	5.8852	12.257
3.9913	0	0	0	2.4898	2.0127	0	5.945	0	0	10.353	0	0	2.3157	0	0	0	1.9441	0	0	2.947	0	6.1959	8.2169	13.172	3.9594	0	11.355	0	1.9758	7.9982	2.4491	0	6.8936	0	0	0	36.559	3.3182	0	0.10648	0	5.8731	10.127
3.4986	0	0	0	1.3077	1.3932	0	4.4092	0	0	8.9497	0	0	1.6825	0	0	0	0.87848	0	0.17623	2.4475	0	8.2543	8.4122	14.065	2.5517	0	10.675	0	5.4048	11.144	0	0	4.7407	0	0	0	37.137	3.06	0	0	0	4.1867	9.4311
3.7893	0	0	0	1.7886	0	0	6.2131	0	0	10.234	0	0	2.2022	0	0	0	0	0	0.12262	3.4364	0	5.3926	7.9219	11.771	0	0	10.712	0	0.81347	12.12	4.7293	0	1.9537	0	0	0	36.606	0.88071	0	0	0	1.1849	9.2276
3.8869	0	0	0	1.857	1.7274	0	4.8649	0	0	11.32	0	0	0.77871	0	0	0	1.2102	0.47219	0	2.486	0	4.8581	7.0196	13.738	0	0	11.568	0	0	11.724	3.1856	0	5.7828	0	0	0	36.639	4.6946	0	0.7285	0	0	9.4891
2.6672	0	0	0	1.9873	0	0	5.7376	0	0	12.18	0	0	5.2699	0	0	0	0.15957	0	1.0716	1.8958	0	4.2156	6.915	14.001	0.69249	0	13.253	0	0	12.612	1.907	0	5.1922	0	0	0	38.035	6.2576	0	1.7792	0	2.8128	9.508
2.1684	0	0	0	1.4175	0	0	3.7805	0	0	13.611	0	0	6.4296	0	0	0	6.3166	1.7889	0	2.463	0	4.6466	6.5941	12.393	6.3218	0	10.411	0	2.2837	10.014	0.642	0	3.6411	0	0	0	37.329	7.4228	0	0	0	1.7465	8.9038
1.8249	0	0	0	1.499	0	0	4.0683	0	0	12.091	0	0	5.6621	0	0	0	0	0	2.5484	1.3354	0	3.3479	5.0046	13.369	1.3437	0	11.68	0	1.2032	11.758	3.8211	0	4.6492	0	0	0	35.228	0	0	0.61548	0	2.9565	8.1939
1.7387	0	0	0	1.2535	0	0	5.1827	0	0	10.785	0	0	6.5651	0	0	1.1255	2.4361	3.214	0.66266	1.7926	0	2.3406	5.7827	14.869	2.3063	0	11.258	0	0	12.179	1.9946	0	7.6313	0	0	0	34.869	0	0	0.87454	0	2.4261	9.691
1.2399	0	0	0	1.5697	0.090533	0	5.1466	0	0	11.443	0	0	5.6863	0	0	0	1.4603	2.1629	0	2.2668	0	0	3.4385	22.971	8.5872	0	10.043	0	0	11.937	2.7954	0	8.1898	0	0.62579	0	36.109	0.12737	0	0.024727	0	5.2008	9.1301
1.8819	0	0.97791	0	2.2172	0	0	5.5642	0	0	10.763	0	0	5.6188	0	0	0.52295	2.0432	2.9089	6.5195	2.5435	0	1.4098	7.1342	23.634	2.9821	0	9.0536	0	0	11.886	6.7631	0	5.3965	0	0	0	32.892	4.0173	0	4.7721	0	2.7363	9.5545
1.1885	0	0	0	0.20841	0	0	6.1035	0	0.051057	10.709	0	0	6.0816	0	0	0.059401	0	0	3.3324	0.98421	0	1.6321	4.1398	32.35	2.4321	0	10.304	0	0	12.892	2.9588	0	7.928	0	0	0	32.314	0.45418	0	0.48511	0	3.5612	6.3349
0.94459	0	0.42511	0	1.8048	0	0	3.5649	0	0	10.143	0	0	3.9579	0	0	0	2.6819	2.618	2.5663	2.9198	0	1.6375	4.8648	33.899	5.8133	0	10.711	0	0	12.939	5.13	0	6.1395	0	0	0	33.44	1.7201	0	0	0	4.8884	7.4614
0.58276	0	0	0	0.50223	0	0	1.6809	0	0	9.7904	0	0	3.5861	0	0	0	2.411	1.3954	2.7241	4.6514	0	0	3.1391	33.304	3.9057	0.35425	8.8481	0	0	16.326	8.1507	0	6.4575	0	0	0	31.252	0	0	0.61416	0	7.3407	7.9839
0.072027	0	0	0	1.6465	0	0.92205	3.4486	0	0	9.0329	0	0	2.3074	0	0	0	2.4652	1.179	1.7502	4.436	0	0	4.7496	34.811	0.55421	0.72851	8.8155	0	0	20.447	8.7334	0	3.028	0	0	0	35.002	1.9931	0	4.4273	0	0.49631	6.773
0.9088	0	0	0	1.8108	0	0	3.039	0	0	7.7127	0	0	2.3468	0	0	0.39267	3.4629	3.7587	2.7214	5.0011	0	0	3.6184	32.048	0	0	5.2635	0	1.6331	16.19	6.4182	0	7.1731	0	0	0	35.42	5.605	0	1.0999	0	2.788	8.5957
0.47029	0	0	0	0.69712	0	0	4.2832	0	0	5.4573	0	0	0.80425	0	0	0	3.2472	2.1456	0	3.5542	0	0	1.6443	29.444	3.4635	0	8.5775	0	0	15.796	5.8655	0	4.2321	0	0	0	35.771	0.71188	0	2.6492	0	2.5868	7.4915
0.50138	0	0	0	0.74885	0	0	1.43	0	0	5.5516	0	0	1.195	0	0	0	0	1.5301	3.0142	2.7912	0	0	2.0133	25.242	8.9756	0	8.473	0	0	16.662	5.8742	0	6.2799	0	0	0	36.478	0	0	2.4699	0	3.1117	9.072
0.79536	0	0.19546	0	0.90063	0	0	1.3268	0	0	6.5664	0	0	1.0935	0	0	0	0.67786	4.3614	2.6175	1.7243	0	0	0	25.788	4.6074	0	8.6569	0	0	10.77	7.2411	0	5.4128	0	0	0	36.808	0	0	2.2661	0	5.1385	8.5354
0.17077	0	0.42014	0	0	0	0	2.542	0	0	5.4515	0	0	2.2605	0	0	0	1.4021	2.9875	1.0029	0.40424	0	0	0.35914	21.703	2.2285	0	6.3818	0	0	9.6002	2.7741	0	7.5849	0	0	0	35.042	0	0	0	0	4.0681	9.3731
0.31135	0	0	0	0.89031	0	0	1.691	0	0	7.2156	0	0	0.4191	0	0	0	0	3.4581	0	0.12974	0	0	0.22538	21.966	3.4933	0	7.3659	0	0	11.528	5.4993	0	6.471	0	0	0	36.769	1.0586	0	2.7326	0	2.8097	7.1371
0.37816	0	0	0	0	0	0	3.0853	0	0	5.6888	0	0	0.053474	0	0	0.1466	0	1.4508	0.934	0	0	0	0	20.204	1.2253	0	7.9561	0	0.47893	6.0877	0	0	6.6405	0	0	0	35.038	0	0	0.38925	0	5.408	8.4026
0.17785	0	0	0	1.3709	0	0	1.5539	0	0	4.952	0	0	0	0	0	1.2179	0	2.0385	0.84389	0.64393	0	0	1.4054	21.454	4.8224	0	8.4454	0	0	12.028	2.5469	0	11.178	0	0	0	36.84	0	0	1.7391	0	1.8283	8.3434
0	0	0	0	1.5705	0	0	1.9504	0	0	6.0684	0	0	0	0	0	0	0	4.7657	0	1.9027	0	0	0	19.029	3.2448	0	8.9292	0	0	8.1578	2.7959	1.1053	15.995	0	0	0	36.681	0.6556	0	0	0	5.2615	8.4313
0	0	0	0	0.47124	1.0114	0	0.23964	0	0	3.1861	0	0	0.62307	0	0	0	0	4.1982	0.16779	2.8681	0	0	0.44921	17.359	4.2558	0	8.5041	0	0	8.2429	0.59085	0.051516	17.798	0	0	0	37.568	0	0	0.82349	0	5.4502	8.3552
0	0	0	0	0.11389	2.0638	0	0	0	0	0.91806	0	0	0	0	0	0.68694	0.96595	4.9824	0	2.2796	0	0	0.01811	14.412	1.8733	0	7.4544	0.5387	0	9.6592	2.9421	0	14.219	1.8833	0	0	37.453	4.7343	0	0	0	5.8517	11.143
0	0	0	0	1.0954	0	0	1.7707	0	0	1.9059	0	0	0.14417	1.4421	0	0	0	4.1323	0	1.7222	0	0	0	17.628	0	0	6.4555	0	0	4.7268	1.9802	0	16.587	0.37041	0	0	39.273	0	0	0	0	4.4851	10.349
0	0	0	0	1.0588	0.85557	0	0	0	0	2.2442	0	0	2.1496	0	1.3893	0	1.5224	2.8097	0.65409	1.8528	0	0	0	17.514	4.6831	0	10.289	0	0	5.9799	0.68549	0.48585	12.323	1.0138	0	0	42.269	0.55292	0	4.0627	0	2.4552	10.341
0.26154	0	0	0	0.032832	2.024	0	1.6082	0	0	1.2664	0	0	0	0	0.31689	0	0	4.0315	0	0.46059	0	0.45453	0	14.054	0	0	6.4071	2.0549	0	5.7115	0	0.72876	13.979	0	0	0	38.637	0	0	1.815	0	4.839	9.4305
0	0	0	0	0	5.2291	0.36325	2.4545	0	0	2.6394	0	0	0	0	0	0	0	2.0353	0.15786	0	0	0	0	10.182	0	0	9.5742	1.5672	0	4.2518	0	0	9.0568	0.30587	0	0	38.938	0	0	0.49175	0	4.8059	10.433
0	0	0.59952	0	0.3066	6.8848	0.95344	0.20379	0	0.10755	3.2967	0	0	0	0	0	0	0.52668	1.3085	1.209	0	0	0	0	14.373	0.90583	0	11.665	0.54255	0	7.4567	0	0	6.8807	1.3418	0	0	40.026	0	0	0	0	2.0108	10.979
0.6397	0	0.39539	0	0.96471	9.6108	0.16188	0.81158	0	0	3.8462	0	0	0	0	1.4799	0.6116	2.257	0.76094	0.16233	0	0	0	0	14.248	2.778	0	11.698	1.3906	0	1.9929	0	0.84641	8.6875	0.09067	0	0	40.556	0	0	1.6867	0	3.27	11.223
0.3575	0	0	0	1.2822	7.3785	0	3.0174	0.042175	0	1.7654	0	0	0	0.41056	0.787	1.6423	0	2.1781	0	0	0	0	0	15.758	3.8813	0	13.584	0.091449	0	8.8455	0	0	8.1768	0	0	0	41.461	0	0	0	0	2.0452	7.7023
0.1317	0	0.13141	0	1.5529	6.6728	0	0.67523	0	0	0.80048	0	0	0	0.12037	0	2.0136	0	3.3767	0	0	0	0	0	11.885	0	0	12.357	0.86485	0	4.1919	0	0	4.8356	0.28935	0	0	41.013	0	0	0.57951	0	3.3017	11.122
0.71547	0	0	0	0	4.8692	0	0	0	0.21985	2.6649	0	0	0	0	0.16701	3.2002	0	0.16745	2.4433	0	0	0	0	13.536	1.6375	0	14.967	0	0	6.4571	0	0	8.1971	0.31939	0	0	44.201	0	0	2.0155	0	1.7521	9.7867
0	0	0	0	0	4.9409	0	1.7158	0	0	0.44764	0	0	0	0	2.115	2.0952	3.4246	1.565	0	0	0	0	0	13.802	3.2569	0	15.589	1.4669	0	1.5397	0.6403	0	9.7039	0	0	0	41.946	3.7159	0	1.375	0	3.4914	3.144
0.49298	0	0	0	1.0371	5.3705	0	1.2051	0.7649	0	3.7598	0	0	0	0	3.0612	1.1541	0	3.0669	0	0.052005	0	0	0	13.577	2.7054	0	13.109	0.19443	0	3.5298	0	0	9.0829	0	0	0	41.046	0	0	0.33167	0	1.7678	8.4053
0	0	0	0	0.99131	4.4846	0	1.2207	0	0	0.85379	0	0	0	0	1.6115	1.8664	0	2.288	0	0	0	0	0	9.9189	0	0	13.564	0.70085	0	2.5328	0.97587	0	7.4231	0	0	0	47.045	2.3236	0	0.22795	0	2.6189	5.3113
0	0	0	0	1.5001	3.7691	0	0.74057	0	0	1.7216	0	0	0	0	0.15059	1.0588	1.6527	2.953	0	0	0	0	0	11.986	2.8934	0	12.652	3.5539	0	3.219	0	0	8.8413	0	0	0	47.046	2.9484	0	0	0	0.41991	7.9559
1.1004	0	0.047978	0	1.6828	4.7514	0	0	0	0	1.9361	0	0	0	0	0	2.9781	1.6596	2.3942	0	0	0	0	0	10.937	0.55952	0	13.494	0	0	2.6808	0	0	7.9811	0	0	0	45.533	4.7001	0	0	0	2.7806	9.0783
1.3257	0	0	0	1.1418	4.4826	0	2.1298	0	0	1.4273	0	0	0	0	1.1617	2.0535	4.695	3.6296	0	0	0	0	0	13.836	5.098	0	13.112	0	0.3064	2.6117	1.0022	0	8.4776	0	0	0	44.49	4.5331	0	0	0	0	7.043
1.1931	0	0.012015	0	1.407	3.7076	0	1.3743	0	0	1.4153	0	0	0	0	0	1.7538	0	1.6251	0	0	0	0.40007	0	15.713	3.3011	0	15.413	4.0543	0	0	0	0	7.5254	0	0	0	44.767	0	0	1.5415	0	3.3247	8.1889
0.97425	0	0.71053	0	1.9035	3.0441	0.38036	2.3082	0	0	0	0	0	0	0.58788	0.6558	0	2.2352	1.7134	0	0	0	1.2776	0	21.207	4.9851	0	12.633	1.2704	0	5.8609	0	0	10.227	0	0	0	46.877	1.9866	0	0	0	4.5711	7.7753
0.98131	0.16417	1.3019	0	1.0382	3.4028	3.0528	2.0695	0	0	1.2056	0	0	0	0.34031	0	1.3525	0	3.2198	1.0071	0	0	0	0	31.952	2.5447	0	13.008	3.2491	0	2.841	0	0	8.0352	0	0	0	46.851	5.0439	0	0	0	1.0316	8.1485
0.46477	0.68513	0.77328	0	1.1799	2.9331	2.0781	3.9976	0	0	0	0	0	0	0	0	2.151	2.1934	3.7038	0	0	0	0	0	32.573	0.68786	0	11.914	5.0485	0	4.628	0	0	9.578	0	0	0	47.153	6.4957	0	0.49768	0	3.2614	4.4156
1.219	0.4834	1.7861	0	0.84848	2.5729	0	3.9192	0	0	0.72744	0	0	0	1.3382	0	0.88061	1.4658	4.2522	0	0	0	0	0	31.8	1.7764	0	13.912	3.4881	0	7.9246	0	0	6.877	0	0	0	46.385	0	0	0	0	0.44875	7.4168
1.8776	0	1.1007	0	2.4254	2.1545	2.5162	5.2044	0.025305	0	1.2574	0	0	0	0.71251	0.68841	0.42864	0	2.9296	0	0	0	0.47141	0	41.199	2.9661	0	13.025	3.4187	0	6.0454	0	0	5.3119	0	0	0	44.56	0	0	0	0	0	6.4453
0.77309	0	4.7165	0	1.0435	0.87468	1.4768	6.8731	0.70261	0	0.94176	0	0	0	0.59459	0.47461	1.7283	0	4.098	0	0	0	0	0.14082	46.355	0.05204	0	13.224	6.378	4.9785	2.5128	0	0	4.7005	0	0	0.93271	46.164	0	0	2.4248	0	1.3662	8.197
0.36472	0.93154	10.921	0	2.0159	0.64923	0	4.6563	0	0	0	0	0	0	0	0	2.1223	0	1.6951	0.26707	0	0	0	1.3478	43.519	0	0	13.798	2.4143	6.1568	8.9882	0	0	4.4741	0	0.93586	4.4078	46.26	0.9054	0	5.0757	0	1.8635	9.2584
0.55091	0.47091	12.343	0	0.23354	1.6119	0	5.0438	0.2774	0	0.3174	0.24152	0	0	0.074824	0	3.5765	0	4.2226	0	0	0	0	1.9359	42.64	1.8344	0	13.62	4.3798	5.6783	5.5776	0	2.9166	2.5623	0	0	8.4742	43.431	0	0	0.5983	0	0	7.6872
0.83533	0.16494	11.625	0	1.0223	0	0.3514	6.853	0.29549	0	1.7047	0	0	0	0	0	3.6135	0	1.744	1.871	0	0	0	4.1055	41.193	3.7887	0	15.72	3.9041	5.1665	10.118	0	0.077131	2.5435	0	0	5.8164	42.745	0	0	3.5334	0	3.2244	9.3552
0.62409	0	11.287	0	1.7768	0	0	4.6836	0.24612	0	2.6853	0	0	0	0	0	4.6845	0	3.3375	2.5871	0	0	0	6.5665	43.202	4.4805	0	16.897	0.43573	5.1576	3.6794	0	2.6636	1.117	0	0	7.2172	42.449	0	0	1.6527	0	1.5286	10.672
0.48593	0.073144	10.665	0	1.9304	0	1.3176	5.9416	0	0	1.3531	0	0	0	0	0	4.2728	0	1.8485	2.1963	0	0	0	8.0076	36.149	8.777	0	17.602	1.8637	1.0438	8.3617	0	1.1634	3.5102	0	0	4.3966	43.716	0	0	2.2486	0	3.1491	8.5554
0	0.23711	10.633	0	1.2189	0	0.28296	6.8335	0	0	3.3202	0	0	0	0	0	4.902	0.70687	0.5816	3.2005	0	0	0	6.392	33.442	0	0	14.887	4.2329	0	6.8792	0	0.4319	6.4604	0	0	4.226	42.137	0	0	1.6699	0	0	7.9673
0.40276	0.14754	9.6195	0	2.5792	0	1.6262	5.0024	0	5.3115	1.7454	0	0	2.3331	0	0	2.7599	0	1.0561	4.4984	0	0	0.177	8.8162	31.557	0	0	14.078	3.563	0.046854	6.5468	0	1.7457	6.3498	0	0.12338	5.4212	40.606	0	0	1.3737	0	2.4521	10.95
0	0	7.5983	0	2.9654	0	0.43999	4.7872	0.21131	7.8159	2.4273	0	0	1.7827	0	0.004675	4.3628	0	2.2257	4.6828	0	0	2.6	12.259	35.832	0	0	17.908	3.7432	2.9079	8.5611	0	2.1024	3.3829	0	0	4.6795	39.353	0	0	4.0194	0	2.9937	10.282
0	0	7.6598	0	2.6136	0	1.5474	5.5408	0.40098	10.366	0	0.77384	0	3.6883	0	0.18735	2.0855	0	1.3131	1.1542	0	0	0	11.23	29.12	0	0	17.37	3.3893	1.46	4.7468	0	1.101	4.776	0	0	2.9934	38.809	4.0401	0	1.6576	0	0	8.22
0	0	7.1278	0	1.8895	0	0.14828	8.1327	0	11.658	1.618	0.24955	0	2.5144	0	0	3.9883	0	0	0.081413	0	0	0	15.946	29.344	2.0232	0	17.562	1.9546	1.2818	6.3419	0	2.3387	2.1841	0	0	4.5187	38.256	2.247	0	0	0	0.40828	8.0452
0.076786	0	7.09	0	4.19	0	0.033868	4.1808	0	10.965	3.3738	0	0	1.43	0	0	2.8363	0	1.2824	4.7166	0	0	0	18.302	33.327	0.31423	0.030605	17.241	0	3.5339	2.5078	0	2.2101	1.4588	0	0	2.0573	38.45	0	0	0.22874	0	0	8.4041
0.53763	0	6.2138	0	3.623	0	0	7.2082	0	9.7444	2.1394	0	0	0	0	0	5.463	0	1.1726	2.9973	0	0	0	20.614	29.495	7.7995	0.69145	16.013	0.73313	0	1.6951	0	4.0525	2.0713	0	0	0	41.187	0	0	2.0256	0	0.47759	10.736
0	0	5.9655	0	4.7157	0	2.57	3.2365	0	9.4639	2.6569	0	0	0.63712	0	1.1181	3.6357	0	1.8327	0.2224	0	0	0	21.072	28.621	0	0.4738	14.453	0	0	7.6892	0.8969	1.6353	3.1923	0	0	0.51631	38.177	0	0	2.1344	0	0	11.314
0	0	3.2868	0	3.6718	0	0	4.6416	0	14.303	1.4914	0	0	0	0	0	4.2083	0	0.67786	2.3282	3.3074	0	0	16.778	28.546	0.16308	0.27567	12.638	2.2482	0	4.9868	0	0.26852	4.5361	2.9187	0	0.75813	38.049	5.44	0	0	0	3.0975	8.7038
0	0	2.9232	0	1.6379	0	2.0782	3.4746	0	12.681	1.6062	0	0	0.66123	0	0	4.584	0	1.5154	1.1136	3.4385	0	0	17.969	26.592	0	0	14.519	0.82469	0	7.0844	0	0.98191	1.4747	4.2691	0	0.86558	35.565	0	0	4.4772	0	1.5675	10.824
0	0	4.6645	0	4.7803	0	0	3.0429	0	12.393	0.8198	0	0	0.094341	0	0	3.4253	0	2.1505	2.028	5.1192	0	0	20.727	30.951	4.5844	1.7572	14.612	0	0	8.3146	0	3.9857	1.5776	1.421	0	0.5919	38.614	0	0	2.3895	0	1.1705	11.815
0.32413	0	3.3772	0	3.9091	0	0	2.7604	0	11.134	2.6409	0	0	0	0	0	2.4809	0	3.7017	2.188	7.1826	0	0	20.543	30.058	4.1158	0.16851	16.376	0	0	7.531	0.58403	6.1134	2.039	0	0	0	40.348	0	0	3.1013	0	1.6996	13.56
0.59729	0	3.3832	0	4.2643	0	0	2.1047	0	10.117	3.4283	0	0	0	0	0	2.9241	0	2.0612	2.5493	6.6701	0	0	23.609	26.906	5.428	0.10137	16.461	0	0	9.0103	2.352	3.5259	1.4748	2.3595	0	0	41.574	0	0	2.867	0	4.7141	12.688
0.068824	0	2.3083	0	3.1348	0	0	4.0514	0	7.9407	2.5269	1.3571	0	0	0	0	1.3455	0	0.30014	0.73098	6.5302	0	0	25.099	25.192	1.7802	0.10642	13.396	0	0	5.0269	2.041	9.7272	1.6862	2.2704	0	0.47678	39.236	0	0	5.2645	0	1.5871	14.721
0.36689	0	2.815	0	4.2978	0	0.28779	2.262	0	5.7663	3.37	0	0	0	0	0	2.3425	0	2.7887	0.49692	5.7916	0	0	25.284	23.543	7.4204	0.94833	13.516	0	0	11.102	3.8397	5.309	5.4795	2.7808	0	0	37.532	0	0	4.8447	0	3.31	15.787
0	0	2.2469	0	4.5738	0	0.72839	0.58465	0	4.7146	5.8547	0	0	0	0	0	1.2689	0	2.3196	2.939	5.8722	0	0	26.559	22.571	6.9639	1.9339	12.502	0	0	5.6112	0	18.046	2.1667	1.6936	0	0	39.559	0	0	3.4674	0	0	15.885
0.43064	0	2.6901	0	4.4275	0	0	1.5956	0	4.0742	3.3012	0	0	0	0	0	0.030239	0	2.189	1.9374	4.4467	0	0	26.701	19.657	2.703	0.89928	11.709	0	0	4.7153	2.5074	20.19	1.6691	3.6535	0	0.53778	36.517	0	0	5.1659	0	0.14267	17.131
0	0	1.5756	0	3.2163	0	0	0	0	4.225	2.0967	0	0	0	0	0	1.7612	0	2.2044	0	4.8064	0	0	27.565	19.351	1.5521	2.2446	9.8792	0	0	5.4248	0	19.212	1.8102	3.7672	0	0.41943	35.744	0	0	3.1879	0	0	15.418
0	0	2.671	0	3.8778	0	0	0.67664	0	2.283	2.071	0	0	0	0	0.42676	2.3707	0	1.1328	2.1556	4.8537	0	0	27.166	18.999	2.8462	1.8267	9.1762	0	0	4.9952	1.3132	22.087	1.6043	3.7809	0	1.5344	37.986	0	0	3.1537	0	0.21856	17.175
0	0	0.97456	0	4.5487	0	0	1.1585	0	2.11	1.6798	0	0	0	0	0	0.43956	0	1.9053	3.4995	6.2322	0	0	30.221	16.658	0	1.8651	11.855	0	0	10.027	0.88747	27.535	0	5.0532	0	0	36.963	0	0	4.6906	0	0.17049	19.714
0	0	0.44268	0	4.3879	0	0	1.4334	0	2.56	1.7332	0	0	0	0	0	1.0348	0.39892	2.0384	2.1097	5.96	0	0	32.47	15.462	4.5048	1.1422	11.637	0	0	10.485	0	28.892	2.2945	2.5464	0	0.23207	36.975	0	0	1.7901	0	0.48265	14.897
0	0	0.64403	0	5.3712	0	0	0	0	1.1651	2.0149	0	0	0	0	0	0.50527	0	0.6914	0.2631	4.4577	0	0	33.887	17.234	0.71746	1.6001	9.0966	0	0	10.933	0	32.665	1.595	3.2419	0	0	36.107	0	0	1.6737	0	3.4931	15.535
0	0	0.92842	0	5.3136	0	0	0	0	1.4339	2.5058	0	0	0	0	0	1.0133	0	0.8586	2.5798	5.3901	0	0	34.66	16.793	4.6986	0.45524	10.771	0	0	9.3553	0	33.119	0.57074	2.1279	0	0	38.18	0	0	4.3773	0	2.7376	15.305
0	0	0.14375	0	5.4061	0	0	0	0	0.02674	2.4053	0	0	0	0	0	1.3327	0	0.58227	5.1883	6.1753	0	0	36.44	14.552	8.9809	1.4639	11.59	0	0	12.277	0.41777	36.024	1.2764	4.8386	0	0	39.014	0	0	5.2426	0	0	13.973
0	0	1.4477	0	8.0889	0	0	1.0064	0	0	3.4026	0	0	0	0	0	0.90562	0	2.099	0.11666	5.8473	0	0	38.568	16.118	3.0446	2.3821	10.256	0	0	11.173	5.2814	36.712	2.8005	3.6679	0	0	36.082	0	0	7.0124	0	1.1417	16.319
0.32966	0	0.32431	0	5.5804	0	0	1.3221	0	0.86429	4.5559	0	0	0	0	0	2.5547	0	2.2963	4.7847	3.9214	0	0	38.595	14.897	5.8494	0	8.8035	1.0134	0	6.5498	3.2477	35.802	3.6043	4.2875	0	0	32.818	0	0	5.065	0	2.8528	16.428
0.22555	0	1.5332	0	6.9541	0	1.8533	0.90294	0	2.3396	4.6489	0	0.24309	0	0	0.095995	1.2607	0	3.3469	4.125	3.7717	0	0	37.846	13.444	7.4672	0	7.6054	0	0	8.8214	3.1237	31.436	2.0066	4.9079	0	0.50252	31.887	0	0	5.2682	0	1.9932	13.696
0	0	0.097948	0	6.2888	0	0	1.1748	0	0.74761	4.6995	0	0.08931	0	0	1.0711	1.4991	0.014124	2.808	3.4554	3.3551	0	0	38.504	17.411	1.9475	1.893	7.3014	0	0	13.031	3.0799	29.591	2.3846	5.5746	0	1.6213	33.6	1.9884	0	1.0594	0	4.8062	9.321
0.14972	0	2.0445	0	5.3508	0	0	0.8315	0	1.5796	4.6919	0	0.12166	0	0	0	1.565	0	0.085084	0.9509	4.0791	0	0	38.622	18.062	6.2633	0.33299	9.165	0	0	11.123	0	29.566	5.8511	1.3641	0	0	35.41	0	0	3.6898	0	2.6197	14.449
0.41325	0	0.22807	0	5.4489	0	0.62635	2.3424	0	2.1811	1.7037	0	0	0	0	0	0.6838	0	4.3715	2.2551	5.4834	0	0	37.72	20.59	3.8089	0.35	6.6297	0	0	13.679	7.4936	26.956	6.1782	1.5878	0	0	32.667	0	0	5.9424	0	4.2475	14.964
0	0	0.50482	0	5.6982	0	0	1.3568	0	2.2611	3.1778	0	0	0	0	0.647	1.8567	0	5.6527	5.4574	5.1414	0	0	34.551	18.895	4.5305	0.3815	8.197	0.17906	0	11.666	7.4681	26.849	4.7244	4.6893	0	0	37.635	0	0	3.0262	0	0	15.189
0	0	1.1476	0	5.5374	0	0	1.4879	0	0.95825	2.1705	0	0.29301	0	0	0	1.0212	0	8.2462	5.7405	3.3463	0	0	31.773	22.03	4.8528	0.48478	5.59	0	0	7.3666	0.94291	27.805	6.1222	3.4371	0	1.4082	35.382	0	0	3.2454	0	0	12.406
0	0	0.89369	0	4.9648	0	0	2.6965	0	0.92363	2.8129	0.30651	0	0	0	0.11419	0	0	7.2686	5.2221	4.4856	0	0	27.812	22.408	3.7756	0.75728	5.2125	0	0	14.619	6.4111	20.198	15.116	3.1533	0	2.324	33.861	0	0.91355	4.8102	0	4.1541	14.428
0	0	0	0	4.8176	0	0.75507	3.5884	0	0.58928	4.3432	1.0394	0	0	0	0	0.80927	0	9.2849	3.7031	4.2793	0	3.0483	27.453	24.216	3.0735	1.4703	7.0924	0	0	10.83	7.1363	15.195	20.419	3.2443	0	1.8462	33.966	0	0	4.4268	0	2.5641	15.038
0	0	1.3302	0	3.9988	0	0.51167	3.2238	0	0.020306	5.0019	0	0	0	0	0	2.5445	0	9.0032	6.5957	5.3712	0	1.4703	26.586	23.412	5.9079	0.95101	9.7148	0	0	12.655	7.0432	14.399	20.906	4.4906	0	0	30.768	0	0	4.2196	0	5.3716	14.652
0.050703	0	1.6888	0	3.6789	0	0	3.9699	0	0.9739	5.0735	0	0	0	0	0	0.80572	0	9.2336	1.2143	5.5275	0	1.3262	21.314	42.003	15.037	1.3381	9.4668	1.6843	0	9.3871	6.377	14.379	19.327	4.6942	0.98471	4.5224	33.175	0.10268	0	6.5128	0	7.77	13.654
0	0	2.1598	0	2.9654	0	0	4.6025	0	0	3.8641	0.99653	0	0.37684	0	0	0	0	7.0752	4.4595	5.813	0	1.5184	18.543	42.859	8.6534	1.4639	9.5768	0	0.040392	9.997	6.7442	16.187	19.754	4.6204	0	1.501	33.719	0	1.2684	8.7994	0	5.9572	13.625
0	0	2.2455	0	3.0473	0	0	2.7395	0	2.3621	4.5022	0	0	8.6139	0	0.23695	0.69582	0	5.8703	4.349	5.4173	0	1.1634	19.452	44.502	5.5591	1.6512	8.7099	1.288	0	8.9526	2.7748	16.94	18.525	1.9498	0	3.8773	35.669	0	1.5735	8.6978	0	9.6794	11.849
0	0	3.594	0	4.7909	0	0	5.8301	0	11.99	4.4427	0	0	21.252	0	0	1.2006	0	5.2132	5.949	7.5831	0	3.9343	18.196	44.19	5.912	3.6546	12.038	0	0	15.479	8.4762	16.612	18.527	3.2104	0.39202	1.1471	35.115	0	1.625	10.195	0	7.2035	12.757
0	0	2.4319	0	4.4238	0	0	3.9488	0	11.017	4.8755	0	0	23.413	0	0	0.22361	0	4.6401	7.7395	8.3304	0	6.6742	16.224	41.122	1.9902	3.0404	11.449	0	0	14.944	4.8213	13.032	14.516	3.9644	0	3.8154	33.811	0	0	4.6056	0	13.307	14.442
0	0	2.193	0	3.4375	0	0	2.8478	0	11.047	4.5941	2.1668	0	22.077	0	0	0.30509	0	7.1461	7.6041	6.1033	0	3.4523	15.565	39.561	1.2975	2.5229	7.1922	0.37886	0	10.224	4.0579	13.465	16.802	4.7475	0	2.4673	33.251	0	0.83666	6.0166	0	5.5946	10.159
0	0	0.86941	0	1.3845	0	0	3.3873	0	10.623	2.8134	0.74289	0	22.872	0	0	0	0	5.6806	3.306	5.4009	0	8.3449	15.699	41.841	0	1.1994	9.3213	1.45	0	8.6526	0	8.507	15.372	6.3073	0.59681	3.4031	30.244	0	0	8.7373	0	6.7382	11.934
0	0	1.0712	0	3.4746	0	0	2.1634	0.44554	9.3419	4.3526	0.30547	0	21.873	0	0	0.20353	0	3.9265	5.6222	2.9846	0	5.4137	14.766	32.917	1.1912	1.8938	7.4785	0.468	0	17.888	3.655	8.8731	15.369	4.9995	0	1.7619	29.842	0	0	3.8779	0	5.5953	7.5648
0	0	0.82423	0	2.5507	0	0	3.6774	0	8.1528	2.9108	0	0	19.446	0	0	0	0	2.3357	4.9775	2.9626	0	5.436	13.842	32.461	0	1.9096	8.8986	0	1.372	12.794	2.8862	3.792	14.201	4.0338	0	0	27.901	0.16982	0	4.8241	0	3.5907	10.31
0	0	0.19927	0	2.3111	0	2.4365	2.5348	0	10.116	5.4618	0.31981	0	17.825	0	0	0.22366	0	3.9252	6.3984	4.8867	0	5.9376	17.308	34.391	1.8637	5.4836	7.6454	0	0	7.7511	2.0713	9.8798	13.025	5.4615	0	0.40742	31.577	4.0832	0	4.3095	0	4.7208	13.456
0	0	1.5425	0	3.6668	0	0.56289	2.8901	0	10.484	5.4129	0	0	15.954	0	0	0	0	4.9337	6.0314	5.9433	0	3.4389	20.486	32.727	4.2394	5.4811	9.2234	3.5396	0.38718	8.1863	2.6175	10.093	14.544	3.6386	0	0.4208	32.813	4.1132	0	4.4441	0.63764	1.2419	13.563
0	0	2.1992	0	4.9204	0	0	0.80132	0	10.323	3.5998	0	0	13.979	0	0	0.6983	0	1.0157	8.7347	7.1306	0	3.0025	24.864	41.149	5.0755	5.9915	9.3723	0	0	9.2556	6.654	13.32	14.732	4.9125	0	3.8657	33.26	6.059	0	3.7538	1.0725	1.0913	16.391
0	0	0.91258	0	3.5728	0	1.7598	0	0	10.879	5.5162	0	0	12.28	0	0.027514	0	0	1.9106	7.3976	5.7725	0	4.4306	21.445	51.528	2.4966	6.6006	4.9128	0.99945	0	9.3956	1.7211	11.002	13.108	5.8376	1.7501	0.7531	31.366	3.7831	0	6.0774	0.066509	3.3932	15.781
0	0	0.61607	0	3.6366	0	0	1.3127	0	16.975	3.7744	1.0424	0	12.037	0	0	0	0	1.5499	7.1025	4.9854	0	0.81434	22.734	49.087	3.811	6.1332	5.5552	0	0	5.4835	0	7.8714	8.9055	3.976	0	0	27.766	0	0	2.4394	1.7841	1.3507	11.975
0	0	1.2264	0	3.3664	0	0	0.62512	0	15.918	3.9759	0	0	16.941	0	0	0	0	2.3478	6.0949	4.6052	0	4.264	23.121	45.537	4.1173	5.1075	6.2544	0.081459	1.7845	5.8231	0	8.4359	7.9255	3.2122	0	0.37488	31.325	2.2704	0	4.8251	1.3829	0	13.894
0	0	2.0514	0	5.548	0	0.080722	3.3706	0	15.471	4.1072	0	0	34.509	0	1.0536	0	0	3.2831	4.4656	5.1156	0	4.818	22.56	46.412	4.8626	5.5476	8.1629	0	3.3241	15.298	2.3033	7.831	12.789	1.0796	0	1.7245	34.62	6.6071	0	3.7871	0	2.5286	11.745
0	0	2.2945	0	4.37	0	0	0	0	15.479	5.0103	0	0	47.398	0	1.9214	0	0	4.4659	11.487	5.5386	0	4.4544	21.149	43.052	5.9549	5.8651	10.5	0	0	16.933	3.7218	6.0045	14.617	1.5216	0	4.2166	33.144	0	0	6.4412	0	7.1699	14.232
0	0	1.9237	0	3.9466	0	0	1.0719	0	14.043	5.0499	0	0	45.883	0	0	0	0	5.5666	6.803	3.9881	0	5.4737	18.326	44.771	5.0094	4.9735	7.4866	0	0.38545	13.032	8.0047	10.173	18.593	0.96589	0	5.4459	33.191	2.1868	0	4.5202	0	6.3219	11.477
0	0	2.4636	0	2.8407	0	1.4251	0.62279	0	14.097	4.0807	0	0	47.264	0	0	0	0	5.6248	8.2039	4.122	0	9.5661	16.343	42.506	8.0813	4.6033	9.1125	0	0	11.06	1.188	6.9426	17.858	3.7801	0	4.7374	31.871	8.1368	0	2.1671	0	7.6263	11.182
0	0	1.4121	0	3.3452	0	0.62715	2.3794	0	11.642	5.1957	0	0	45.674	0	0	0.15516	1.1879	4.2688	8.1193	3.6583	0	13.712	13.183	38.496	4.9638	4.3747	5.5572	0	0	15.656	2.1526	5.1254	16.206	2.7511	0.9574	4.5447	33.041	6.953	0	3.015	0	3.4854	11.673
0	0	1.6347	0	3.6215	0	0	3.7991	1.1155	8.925	4.0309	0	0	47.747	0	0.33259	0	0	3.4085	7.9985	4.6979	0	16.421	14.679	36.137	0	3.2272	9.3693	0	0	17.441	1.8025	3.8299	19.022	1.9469	0	4.9826	28.899	10.117	0	7.9723	0	5.0351	10.648
0	0	1.0508	0	2.7746	0	1.9126	3.9189	0.56756	8.7783	5.9036	0	0	46.953	0	1.1623	0	1.2129	4.6022	8.7601	3.1676	0	15.148	10.611	38.302	12.053	4.7785	7.631	0	1.6627	16.812	6.2767	4.0582	17.371	0	0	6.1021	32.227	11.149	0	4.8434	0	6.7704	11.143
0	0	2.0886	0	3.6607	1.9389	0.53431	5.8479	0	7.1941	6.7519	0	0	43.4	0	3.2631	0	1.3091	5.8955	11.831	5.0357	0	18.316	11.014	35.438	0.74824	6.7806	7.2168	0.37348	4.5063	10.495	4.9832	1.0021	15.024	4.0439	0	3.9097	32.881	11.151	0.5469	8.3556	0	6.2848	13.646
0	0	1.8623	0	4.9962	2.3219	3.4268	7.6425	0	8.7675	6.6479	1.663	0	42.462	0	0.21162	0	0.50943	5.0648	8.6809	3.6739	0	22.435	9.0644	33.879	6.7014	9.4961	7.0493	0	0	9.051	2.927	4.491	20.513	3.3607	0	6.2219	36.102	9.862	1.6692	8.1106	0	6.8938	11.706
0	0.027237	1.3251	0	4.3985	0	2.8976	7.432	0	15.676	8.1746	3.1808	0	40.757	0	2.512	0	0.84492	4.6404	7.4935	2.6636	0	21.078	9.6319	28.158	2.2037	9.2816	8.5132	0.47569	6.8597	7.9183	2.5348	0.7909	19.835	4.3143	0.52045	4.4398	33.022	9.9817	0	9.3963	0	6.7006	14.268
0.6049	0	2.3348	0	2.7628	1.3866	4.5584	10.352	0	19.567	7.1498	3.6414	0	43.487	0	1.2929	0	0.88818	6.0584	7.0611	2.1983	0	17.518	8.5521	27.465	7.8152	8.2226	5.6649	2.7701	4.9238	12.899	4.5077	4.7713	17.778	5.3022	2.915	4.4815	32.037	16.157	0.30656	11.533	0	6.7317	11.802
0	0.3999	2.6248	0	1.191	3.0943	5.5457	9.3079	0.69915	20.567	8.6598	3.4707	0	41.37	0.53427	3.9728	0	5.5292	7.931	9.8608	2.2507	0	27.189	7.8298	27.353	7.452	8.0186	6.345	0.059942	6.1163	9.6359	0	5.8035	19.525	2.3513	2.4843	6.1614	31.761	15.992	0.0066668	9.4283	0	11.413	9.4654
0	0.58384	2.2449	0	3.1093	5.9939	4.9933	11.742	1.849	29.824	5.9142	3.5007	0	41.174	0	2.5858	0	1.3458	4.7559	7.7786	1.0522	0	27.605	5.7511	22.825	1.559	8.0879	7.3039	5.0806	6.2887	8.1456	0.81423	4.3035	18.335	6.0892	0	6.3617	30.323	15.556	0	7.8281	0	11.11	11.209
0.051252	0.64607	1.7262	0	0.61842	3.1328	3.0063	11.264	0	29.229	8.2603	3.0031	0	40.51	0	2.5639	0	0	4.9405	8.969	1.2698	0.13968	29.223	5.0348	22.431	8.338	5.6244	7.0231	1.2976	4.2587	12.045	0	1.0774	18.792	5.6392	0	6.1855	30.791	17.06	0	8.5576	0	7.2665	14.643
1.0573	0.84149	1.8186	0	3.0565	4.8901	1.2403	11.223	1.5927	30.307	6.8261	3.8138	0	41.849	0	4.3611	0.68296	0.00049723	5.298	9.0884	1.0304	0.68252	29.413	5.2043	23.779	9.0011	5.3851	10.931	7.0451	3.4318	8.653	4.1516	0.94366	19.098	4.8979	0.46324	7.3854	30.575	13.342	0	7.9914	0	9.8855	12.234
0.8691	1.71	2.584	0	2.9996	2.7905	5.8696	12.453	0.87168	37.625	8.3889	5.0883	0	46.832	0	7.9799	0	0	3.2004	9.1529	1.5357	0.065692	26.769	4.1125	25.019	9.2145	6.9721	10.369	0	4.6493	11.572	4.8205	3.6453	14.02	3.8259	0	4.2163	34.09	16.801	0	6.0349	0	12.447	11.551
1.0752	0.74097	2.2394	0	2.5734	3.4401	5.0824	14.382	0	36.9	9.1213	6.2255	0	48.119	0	3.281	0.073265	0.93084	4.3658	12.448	2.2334	0	29.054	3.8078	25.322	4.5226	7.1685	7.351	0	6.7017	13.86	7.7268	1.129	17.467	4.0916	3.312	9.1934	34.441	23.345	0	7.3753	4.0764	11.485	11.062
0.44143	1.1137	2.5199	0	3.0507	2.48	3.7528	18.377	1.0842	35.383	11.416	3.6572	0	45.149	0	5.7509	0.71372	0	6.9046	12.374	2.4639	0	25.366	3.7298	25.967	11.942	7.1827	11.638	2.0034	5.1861	7.3976	8.2964	4.091	18.208	3.4216	6.6619	7.7033	35.401	22.587	0	8.7245	2.3758	14.792	9.2983
1.5163	0.70287	3.345	0	1.8058	3.9971	4.3384	17.166	0.52932	40.613	15.46	6.4519	0	47.579	2.123	4.8885	0	0	4.9614	13.657	2.2972	0	26.775	4.3382	26.332	5.3606	7.2405	12.952	4.9583	8.732	15.348	8.3703	1.6973	17.401	4.7209	9.9218	10.802	34.879	27.8	0	9.2392	5.7406	21.952	9.6869
0.14282	0.65697	4.6728	0	2.2967	4.3865	7.4871	20.488	3.4119	56.111	15.76	5.9601	0	62.613	1.9666	6.8671	0	0	4.4636	17.507	2.4297	0	24.327	0.035205	31.541	4.3479	7.5635	10.227	2.3305	10.825	9.2389	7.2111	0.59593	18.744	2.3788	10.316	7.4134	36.081	33.115	0	8.8553	2.919	22.378	6.299
0.32755	0	4.6517	0	1.8593	3.4857	8.1892	20.617	0	65.407	18.403	4.657	0	65.975	0.068318	5.4153	0	0	5.3178	14.505	3.8531	0	24.928	0.2996	46.383	3.7627	4.8132	13.555	2.0471	12.8	15	6.5908	0	19.874	0.92849	6.6876	16.473	34.998	36.899	0	5.6654	2.9516	21.254	4.0363
0	0	4.035	0	3.8605	0	1.6825	21.934	0.055801	65.255	17.176	4.4699	0	62.119	0	4.6802	0	0	6.7976	15.328	4.6914	0	20.786	0.85796	47.287	10.259	6.604	13.915	0.40883	6.1919	9.2201	6.4351	0	18.682	1.7235	4.7678	9.4291	36.504	25.73	0	6.4956	3.0496	21.267	6.0653
0	0	4.1372	0	0.22001	0.42283	3.7166	22.409	0	61.06	16.578	2.711	0	60.718	0.10248	0.24766	0	0	5.8085	15.706	3.7386	0	18.256	0	44.787	1.9581	6.0144	15.57	2.1243	4.7949	4.9277	5.9915	0	19.004	1.8948	6.7077	7.2248	36.693	23.368	0	8.9484	0.98579	19.928	6.8366
0.090697	0	3.6956	0	2.8418	0.73118	2.8261	21.366	0	59.358	18.148	2.2884	0	56.603	1.4514	1.3802	0	0	4.1498	12.445	5.4541	0	19.696	2.5643	41.862	6.2748	3.4731	15.893	0	5.3711	10.439	4.63	0	21.239	2.0479	1.2071	9.7906	37.288	16.3	0	10.504	0	21.162	7.572
0	0	2.6065	0	2.143	0	6.2803	20.969	0	55.815	15.529	0.6878	0	52.536	0	1.15	0	0	2.0751	14.029	5.319	0	19.113	0	43.443	4.2543	3.8336	12.719	3.7023	1.8816	11.526	5.4446	0	18.182	0.60277	1.0631	6.7382	36.874	19.153	0	5.1198	0	14.116	6.3816
0.03249	0	3.0983	0	2.7875	0	3.2156	18.174	0	52.557	14.365	0	0	48.941	0.53592	0.50953	0.12029	0	3.758	11.899	4.2516	0	17.671	1.0052	37.999	7.4462	2.6384	12.123	0	6.7013	10.675	3.925	0	18.226	0	0	8.8825	35.987	16.066	0	5.0605	0	13.866	8.3184
0.20623	0	3.6706	0	1.9966	0	3.6274	19.514	0	47.806	13.449	0	0	43.821	0	0	0	0	3.5919	6.6506	3.286	0	14.165	0.78405	36.718	4.608	2.2295	13.918	0	9.2893	6.5983	2.1588	0	13.461	0	0	8.0304	34.923	13.235	0	8.5733	0	15.059	8.4939
0	0	2.2349	0	3.632	0	0.90748	16.829	0	42.824	13.428	0	0	41.623	0	0	0	0	3.1001	10.731	4.2453	0	12.023	0.95814	34.605	3.7877	2.6514	15.011	0	3.6654	9.0337	1.3565	0	13.298	0	0.24003	2.0979	33.608	10.477	0	7.4284	0	10.722	6.2568
0	0	2.3554	0	1.6107	0	1.6781	15.059	0	39.226	14.798	0	0	38.773	0	0	0.63759	0	1.2506	12.671	3.2237	0	9.9429	0.55158	33.59	2.9931	1.8099	15.614	0	1.0067	9.1078	1.6571	0	11.985	0	0.87938	6.8583	34.967	6.0409	0	6.1238	0	13.18	7.9448
0	0	1.1163	0	1.5212	0	2.0747	16.753	0	35.032	13.766	0	0	35.818	0	0.82679	0.27145	0	1.1599	5.5582	4.3234	0	11.415	1.9425	31.322	3.679	0.49187	12.602	0	0	4.5248	0.37173	0	11.78	0	0	3.845	33.255	5.0189	0	6.0883	0	12.589	9.8742
0.69217	0	1.1951	0	0.051284	0.45552	0	15.913	0	33.109	13.083	0	0	34.282	0	0	0	0	0.074202	9.365	5.4254	0	12.384	0	28.175	3.4153	1.2467	15.923	0	3.4298	4.9792	1.08	0	10.074	0	0	0	32.954	3.4246	0	4.5144	0	8.9786	11.029
0	0	0	0	1.1404	0	1.9803	11.843	0	28.347	12.89	0	0	32.19	0	1.2469	0.18502	0	0.68197	7.2386	6.2211	0	11.724	1.3059	27.779	9.4756	0.22859	15.306	0	2.7572	5.3484	1.9628	0	9.4849	0	5.2431	0.27967	30.055	0	0	6.3599	0	9.7954	11.645
0	0	0.62841	0	1.8738	0	1.6777	10.01	0	32.951	10.777	0	0	34.31	0	0	0.88247	0	0.83262	8.2096	4.2169	0	10.677	0.61294	23.828	8.4071	0.082636	15.661	0	3.3854	6.4488	0	0.86217	7.6857	0	0	0	30.123	4.2124	0	7.4557	0	10.561	13.365
0	0	0.81317	0	0.20512	0	0	10.918	0	36.615	11.709	0	0	49.814	0	0	0	0	1.2387	6.9234	3.7155	0	11.611	0	24.441	2.786	0	14.207	0	6.9361	4.3937	0	3.5432	5.4463	0.79195	0	1.3605	29.949	3.994	0	3.5614	0	7.1098	10.177
0.24129	0	1.4367	0	1.8004	0.22667	0	12.479	0	36.529	9.8621	0	0	62.465	0	1.8214	0	0	1.7555	9.3883	4.01	0	13.249	0	23.15	5.5276	0.94107	14.556	0	4.3806	8.189	0.3956	5.5556	4.7346	0	0	1.2802	29.063	0.15403	0	1.2125	0	8.3845	9.5429
0.68993	0	0.4413	0	0	0	0.57087	9.642	0	36.999	11.503	0	0	74.685	0	0.7874	0	0	0.33219	10.767	4.1234	0	11.679	0.77315	24.442	0.7663	0	14.073	0	0	7.678	0	1.8038	2.8237	1.1166	0	2.5467	29.239	4.2433	0	4.7879	0	10.049	10.363
0.67412	0	2.3055	0	2.7485	0	1.9678	8.515	0	37.119	10.949	0	0	82.589	0	2.9694	0.96066	0	1.5543	9.582	4.0722	0	6.827	0	22.533	1.3842	0	14.204	0	3.8312	8.8749	1.7946	0.6212	3.699	0	0	2.0498	30.82	6.0893	0	3.7549	0	8.192	8.8858
0.66226	0	1.176	0	1.2971	0	0	8.3557	0	39.087	11.048	0	0	81.554	0	0	0	0	1.9587	2.9338	3.3481	0	9.0021	0.20768	20.887	0	0	13.564	0	4.4583	8.2801	0.82787	0	3.8796	0	0	2.6222	29.8	8.0283	0	6.3824	0	9.8117	9.3996
0	0	1.7091	0	0	0	0.66472	6.0321	0	44.528	9.5743	0	0	79.687	0	0	0	0	1.1131	7.2002	1.4835	0	2.7446	0.05882	18.222	0	0	12.61	0	0.96767	11.059	0	0.0032523	0	0.019482	0	4.8169	27.388	3.8996	0	4.3803	0	11.725	6.1161
0.39184	0	2.1925	0	2.0342	0	0.53502	6.1128	0	44.986	7.1357	0	0	76.004	0	0	0	0	2.2588	8.044	1.1657	0	4.1337	0	20.03	0	0	11.167	0	0	9.1014	0.12789	0.34883	1.5633	0	0	2.3246	27.233	4.6826	0	1.9328	0	8.0245	4.7229
0.81721	0	0.089667	0	2.0885	0	0	5.7323	0	44.084	6.4884	0	0	72.737	0	0	0.413	0	1.564	6.9987	1.4573	0	7.5669	0	19.544	0	0	12.593	0	3.5638	8.5964	0	0	0	0	0	1.109	28.802	0.38507	0	3.132	0	8.8024	5.3676
0.51572	0	2.0508	0	2.4998	0	0	6.1682	0	47.505	7.4367	0	0	69.622	0	1.5578	0	0	2.8457	7.6557	1.1524	0	5.0778	0	18.026	0	0	12.079	0	0	3.5916	0	0.30227	0.8679	0	0	1.4964	28.498	0.30509	0	2.6036	0	6.7738	6.1558
0	0	1.3206	0	1.7011	0	0	5.7094	0	52.671	6.1556	0	0	65.208	0	0	0	0	2.567	3.9696	1.0724	0	3.0906	1.3143	19.547	4.7794	0	10.522	0	0.59592	2.9088	0	0	0.76347	0	0	1.0609	27.001	0	0	4.1485	0	4.9383	6.0658
0	0	0	0	1.663	0	0	6.6514	0	51.949	4.7928	0	0	62.498	0	0	0	0	0.46889	7.3032	0.45914	0	1.9871	0.32436	16.637	0	0	9.5433	0	0	4.0986	0	0	0.60507	0	0	2.0858	25.937	0	0	0	0	5.1782	4.889
0.29595	0	0	0	3.329	0	0	4.9558	0.79582	59.412	4.8791	0	0	59.075	0	0.56417	0	0	3.3727	4.6149	1.108	0	1.5336	0.098662	14.136	0	0	8.1795	0	0	7.7302	0	1.5125	3.7691	0	0	0	24.399	8.1341	0	0	0	9.8637	4.1772
0	0	1.7302	0	3.1914	0	0.083793	4.5317	0.27155	57.164	6.0467	0	0	57.747	0	1.3086	0	0	1.6322	9.7936	1.0975	0	3.1051	1.2279	11.592	0	0	7.8949	0	1.1668	8.3794	0	5.636	3.9579	0	0	1.7783	24.803	9.0837	0	0	0	9.5733	4.6754
0	0	0	0	2.2406	0	1.8475	2.608	0.71538	53.786	4.8715	0	0	56.646	0	0.38022	0	0	0	5.6877	1.0349	0	4.3957	0	11.512	0	0	9.5956	0	0	8.0711	0	9.0237	1.4429	0	0	0.92778	23.439	4.3557	0	0	0	6.7254	5.2344
0.44731	0	0	0	3.7915	0	0	1.9648	0	51.324	3.152	0	0	53.535	0	2.3159	0	0	0	9.7862	2.5317	0	5.1471	6.2445	10.945	0	0	14.492	0	0	10.992	0	8.7298	3.7641	0	0	1.064	21.672	9.2701	0	0.90612	0	7.2429	5.6765
0	0	0.34999	0	4.5159	0	0	1.3243	0	52.176	3.4753	0	0	49.564	0	0.44851	0.00070649	0	0	8.3997	2.3719	0	6.4439	4.4356	14.453	0	0	11.803	0	1.6163	11.796	0	5.8533	3.3453	0	0	0	24.87	12.146	0	0	0	9.5137	7.6375
0	0	0	0	4.3723	0	1.9336	1.2217	0.3696	60.616	3.2942	0	0	46.373	0	3.184	1.4697	0	0	6.5728	2.2426	0	8.9008	6.3987	13.051	0	0	11.919	0	0	12.936	0	7.367	2.4178	0	0	0.93049	24.129	11.428	0	0.54839	0	7.263	4.8607
0	0	0.63769	0	4.6049	0	2.0574	3.4753	0	72.28	2.3395	0.10974	0	42.538	0	2.2768	1.8099	0	0	7.8648	2.4238	0	32.414	4.8127	13.479	0	0	14.221	0	0	10.155	0	10.882	4.6081	0	0	2.077	25.783	12.396	0	1.0935	0	10.655	4.1667
0	0	0.53417	0	4.7736	0	5.0123	3.387	0.33274	80.137	0.87146	2.3053	0	41.297	0	0	0.90155	0	1.418	6.808	2.8328	0	56.153	4.4963	14.933	0	0	12.176	0	6.7571	9.3065	0	10.502	1.4751	0	0	2.587	21.177	18.731	0	0	0	10.313	2.6819
0	0	0	0	4.468	0	1.3688	2.1064	0.22482	82.962	1.0409	1.2323	0	37.166	0	0.79187	1.3537	0	0	8.1034	2.6106	0	61.977	4.269	14.452	0	0	9.679	0	0.14195	7.5447	0	9.8547	2.0831	0	0	3.6572	24.351	18.119	0	0	0	8.8181	3.4484
0	0	0	0	3.5745	0	0.61177	2.2009	0	84.175	1.5884	2.6083	0	34.635	0	2.5766	2.0502	0	0	5.2323	1.3808	0	56.934	6.6324	14.044	0	0	11.317	0	4.9541	4.4747	0	13.275	4.4989	0	0	0.9822	23.009	16.516	0	0	0	7.9195	3.3576
0	0	0.094686	0	4.6219	0	0.58336	2.9587	0	83.318	0	1.7968	0	33.316	0	4.2441	2.9718	0	1.6065	7.396	1.4525	0	56.355	7.4868	13.995	0	0	14.271	0	1.9773	11.155	0	11.68	4.5817	0	0	0.2281	22.506	15.857	0	1.2325	0	11.89	2.0378
0	0	0	0	4.0132	0	0	1.9301	0	80.671	1.0833	1.2466	0	31.636	0	0	1.7267	0	0	8.8281	2.2779	0	51.211	8.4932	17.951	0	0	15.39	0	0	12.881	1.4111	10.456	4.2912	0	0	0.50358	22.988	11.249	0	0.13448	0	7.7453	2.5992
0	0	0.051738	0	4.7528	0	0.18777	3.8117	0.67217	80.397	3.1774	0	0	30.604	0	1.0871	2.2864	0	0.57212	0.63546	0.6918	0	48.061	8.3647	13.886	0	0	14.117	0	3.8723	7.5106	0	6.4934	3.9395	0	0	0	21.018	18.183	0	0	0	7.2415	0.16354
0	0	0.23827	0	2.8024	0	1.4135	5.2122	0.63358	74.462	1.6575	0.5413	0	26.903	0	0	3.0669	0	0	6.9882	0	0	48.414	8.3882	13.629	0	0	14.046	0	0	11.055	0	5.1351	2.4056	0	0	0.29951	19.123	10.013	0	0	0	9.5031	3.8097
0.47701	0	0	0	5.3945	0	0	3.1832	0	72.499	2.0359	0	0	25.724	0	2.1148	3.2917	0	0.15286	7.6184	0.83147	0	40.646	7.0425	15.489	0	0	15.645	0	0	16.578	0	4.1374	4.7218	0	0	0	21.295	6.7694	0	0.28119	0	5.0017	5.233
1.2517	0	0.47661	0	3.6287	0	0.36588	3.6536	0	67.621	2.9043	0	0	24.403	0	1.7948	3.2399	0	1.5165	8.8017	0	0	37.128	7.1738	13.411	0	0	16.503	0	0	14.477	0.11425	1.8109	4.8852	0	0	0	20.175	12.55	0	0	0	12.164	4.3276
0.88745	0	0.46936	0	3.5815	0	2.3156	4.2754	0	62.376	3.4928	0	0	21.649	0	5.053	4.0271	0	2.0178	7.769	0	0	40.42	5.8601	13.384	0	0	14.034	0	3.9728	13.999	0	2.2732	6.8396	0	0	0.87693	20.648	9.4362	0	0	0	5.8983	5.8596
0.011623	0	0	0	3.7603	0	3.0613	2.5477	0	59.725	2.0711	0	0	20.859	0	1.0125	4.1976	0	2.1332	5.2868	0	0	31.875	7.3551	10.804	0	0	13.014	0	2.7814	19.458	0	3.5249	3.3589	0	0	0	22.715	8.7684	0	0	0	10.36	2.3662
0.7879	0	0	0	1.9152	0	0	2.2384	0	54.271	1.548	0	0	19.996	0	5.7031	1.1608	0	1.4825	5.1155	1.4004	0	32.813	5.7958	13.176	0	0	14.769	0	0	13.693	2.2148	1.4281	2.8057	0	0	0.5198	23.705	6.0911	0	0	0	9.2627	6.0758
0.0016016	0	0.028035	0	3.3399	0	0.79637	0.76771	0	51.189	2.283	0	0	16.872	0	3.5155	2.3697	0	0.52472	9.3874	0.81213	0	26.412	4.9162	11.446	0	0	11.969	0	0	13.603	1.3982	6.6232	2.1547	0	0	0.8242	20.525	3.3876	0	4.6913	0	5.8675	10.375
0.2196	0	0.3143	0	0.0086279	0	0.13424	2.3762	0	45.617	2.4073	0	0	17.432	0	3.1632	2.7848	0	0.76051	7.0102	1.1901	0	24.474	3.2837	12.695	0	0	10.789	0	0	11.324	0	10.043	3.3384	0	0	0	19.925	4.6681	0	2.7226	0	5.0936	5.2002
0.53852	0	0	0	0.16077	0	0	0.83857	0	43.672	2.92	0	0	15.75	0	2.1017	1.7287	0	1.0366	7.5663	0	0	22.941	1.0876	14.845	0	0	12.126	0	1.1096	6.724	0	8.8734	2.8442	0	0	0	17.388	3.2088	0	0	0	5.3801	5.1482
0	0	0	0	1.1285	0	0.15662	3.4584	0	39.019	2.9729	0	0	14.766	0	3.3761	1.0248	0	0.3188	7.0297	0	0	19.211	0.63416	9.2819	0	0.17553	11.416	0.8681	1.5656	9.3045	0	7.8649	2.916	0	0	0.44424	17.983	3.4242	0	3.0313	0	5.5682	6.5259
0	0	0	0	0	0	0.85871	1.4809	0	36.28	1.791	0	0	13.712	0	0	0.94543	0	1.6008	8.4069	0	0	20.18	1.2223	11.36	0	0.27304	9.1337	0	0	12.497	0	9.7933	2.2899	0	0	0	20.558	0	0	1.6768	0	2.9562	7.3727
0	0	0	0	0.70547	0	0.036763	0.95819	0	33.407	1.4671	0	0	10.663	0	3.1223	3.7414	0	0	4.7806	0	0	15.956	3.0415	9.9924	0	0	10.817	0	2.1437	9.2365	0	4.7076	1.8192	0	0	0	17.8	0	0	0.097017	0	5.1271	6.1143
0.073034	0	0	0	1.3029	0	2.3377	2.1692	0.18125	32.363	3.084	0	0	11.719	0	0	1.4755	0	0	3.4352	0	0	14.78	2.3995	7.3886	0	0	10.426	0	1.4708	7.6088	0	0.68531	1.2941	0	0	0	16.873	0	0	1.1343	0	3.0202	5.1616
0	0	0	0	1.6803	0	0	2.6129	0.36787	34.346	4.545	0	0	10.851	0	2.4789	1.3823	0	0	4.5583	0	0	18.239	4.1981	8.444	0	0	7.294	0	0	8.9536	0	4.0423	2.7231	0	0	0	16.108	0	0	0.093073	0	1.2287	6.2835
0	0	0	0	1.4767	0	0.35579	1.2443	0.83124	33.798	2.172	0	0	10.429	0	3.1256	0.95577	0	0.94368	4.4756	0	0	9.3164	4.6014	7.8141	0	0	9.8572	0	2.1125	6.5811	0	4.7847	2.0383	0	0	0	16.217	0	0	3.2576	0	2.257	8.739
0	0	0	0	1.9144	0	1.4117	0	0.42037	31.239	2.1476	0	0	10.45	0	0	1.4238	0	0	5.3934	0	0.81828	12.545	4.6475	2.0516	0	0	8.1519	1.3325	4.0379	4.4385	0	4.6609	1.4939	0	0	0	13.957	1.7147	0	2.0425	0	1.9776	9.1047
0	0	0	0	2.8073	1.018	2.3017	0	2.3315	28.907	3.1276	0	0	10.202	0	3.403	0.56635	0	0.43421	6.1831	0	0	12.422	3.9754	9.8647	6.0268	0	7.1035	0	0.56606	14.793	0	12.459	1.9066	0	0	0	16.87	2.5244	0	4.8291	0	3.4881	10.801
0	0	0	0	1.7044	0	1.0817	0	3.3176	25.964	2.2502	0	0	9.3312	0	3.9312	0.89989	0	1.1555	4.3675	0	0.96233	12.034	4.0962	11.77	0	0	8.8633	0.21056	0.61271	9.9279	0	12.116	0	0	0	0.55125	19.228	2.7165	0	2.491	0	0.1366	8.6556
0	0	0	0	2.0402	1.7981	4.7846	0.47601	3.1781	24.167	1.4691	0	0	9.3775	0	3.2179	0.86758	0	4.1595	6.0718	0	0.71045	10.806	4.0521	7.2999	0	0	6.0258	2.119	8.0881	16.169	0	14.164	3.444	0	0	1.2293	20.642	0	0	7.6114	0	0.25498	11.774
0.034961	0	0	0	2.9034	1.4212	4.0775	0	4.0274	22.647	2.9996	0	0	8.7214	0.85527	2.3647	2.3824	0.81509	1.9469	5.2503	0	0.88403	12.22	7.1517	5.4753	0	0	4.8245	2.0786	2.7799	10.353	0	13.525	2.5037	0.53929	0	0	16.951	4.8552	0	2.585	0	0.34301	7.9903
0	0	0	0	1.4684	1.4314	5.3002	0	6.9081	21.12	1.9497	0	0	8.1353	1.0116	1.4069	2.1621	0	0.58477	4.855	0	2.7678	12.549	13.952	6.2932	0	0	7.3357	2.3382	4.8379	6.8997	0	14.795	2.1139	0.64982	0	0.2285	17.685	3.9591	0	2.3733	0	0	8.1307
0	0	0	0	3.4852	2.215	4.0643	0	10.15	23.5	1.9183	0.20901	0	8.1674	0.78085	4.8428	0	0	0.41685	2.032	0	0.67993	12.082	18.423	1.5589	0	0	5.8055	5.8142	2.6071	8.3781	0	11.441	1.3834	3.5979	0	0	15.99	2.0124	0	2.9971	0	0.40322	6.3812
0	0	0	0	3.4679	2.2009	2.7017	1.0806	7.88	27.044	1.1207	1.1351	0	7.4336	0	5.4013	0.84547	0	1.1811	1.9382	0	2.4935	7.9249	21.701	0	0	0	6.669	6.6455	0	8.5948	0	9.1781	0	4.9621	0	0	16.949	3.6906	0	1.2404	0	0.99012	4.5201
0	0	0	0	6.7578	0.57027	3.0364	0.27894	8.5693	25.691	0.45059	0	0	7.1078	0	4.3633	0.26366	0	0.1583	2.7706	0	1.7872	12.959	25.92	3.447	0	0	5.7148	0	4.0599	7.1307	0	5.5943	0	2.0397	0	0	18.641	10.547	0	6.9385	0	5.0357	5.7055
0.49599	0	0	0	5.5593	3.6423	3.6759	1.9466	9.4897	23.133	1.3528	0	0	5.3612	0	2.6906	2.1825	0	0	7.3517	0	1.6138	10.567	27.322	5.983	1.7111	0	8.0086	5.806	10.126	11.32	1.4061	5.0776	4.7692	0	0	2.3279	20.878	5.6468	0	3.9159	0	3.8592	6.9906
0.49857	0	0	0	6.692	2.3896	4.6424	0	8.7013	22.274	2.1345	0	0	5.8049	0	3.9601	2.6626	0.99559	0.70998	3.6403	1.6363	0.6621	6.7795	34.567	8.4377	3.0962	0	9.2362	0.39807	14.864	14.763	0	7.1567	4.0498	0.6627	0	3.5594	22.995	9.1514	0	5.9181	0	8.3812	7.9799
0	0	0	0	5.5205	0	4.1866	0.77063	5.9582	25.857	2.1874	0	0	4.0778	0	4.9891	2.671	1.8534	1.47	3.7364	6.4488	0	4.1579	33.266	6.7141	0	0	7.8191	2.6645	14.333	14.788	0	7.5925	2.1421	4.2153	0	5.2483	23.007	11.73	0	8.8819	0	10.067	9.8669
0	0	0	0	5.7581	1.3004	1.2494	2.3703	6.137	25.286	1.9322	0	0.096138	4.6579	0	2.9077	2.2394	0	0.33184	3.5692	11.456	0	5.3902	33.198	4.3947	1.5386	0	7.0443	4.5625	16.849	9.2617	1.1795	6.4954	2.476	9.6451	0.7704	1.7627	23.906	10.442	0	6.9759	0	11.383	9.9671
0	0	0	0	5.0632	0.65909	1.9626	0.66618	5.9916	23.313	1.3468	0	0	3.6882	0	1.0175	0.57672	0	0	2.1747	10.623	0.12931	2.8951	31.848	6.1327	0.081541	0.6333	8.6333	5.1919	18.052	7.8976	0	7.4261	2.6279	9.6655	1.4227	1.9039	20.669	9.6375	0	6.1118	0	8.149	9.9143
0	0.095122	0	0	5.1272	0	2.3308	0.93691	8.1849	23.289	1.8441	0	0	4.9711	0	2.2614	0.54427	1.5025	1.7379	5.7413	10.144	0	3.9276	31.986	2.0143	0	0	6.7863	6.3974	16.981	9.235	0	4.5923	4.6047	9.056	5.2213	2.2285	19.941	9.5942	0	3.5271	0	9.3417	9.1608
0	0	0	0	4.2291	0	2.0727	1.5026	8.1345	19.853	3.0505	0.51544	0.02535	17.575	0	3.8222	1.2319	0	1.8485	6.998	8.4137	1.146	5.0599	33.577	4.6191	1.2055	0	7.2615	4.3746	12.002	15.591	2.0395	4.9095	0.47072	9.794	3.7766	5.8655	16.988	4.0468	0	8.3842	0	13.891	8.5883
0	0	0	0	5.0617	0.79602	2.0619	0	8.6535	17.585	4.3404	0	0	31.023	0	2.1603	0.75366	0	3.9525	9.8655	8.6836	2.768	1.9632	33.439	7.5204	2.5808	0	9.3252	0.43573	14.797	10.104	0	7.5987	2.2413	7.7499	0	6.0037	19.929	7.319	0	9.6755	0	16.854	9.8821
0	0	0.46583	0	4.7085	0.088831	0.39615	0.10319	7.882	16.497	1.4193	0	0	37.894	0	2.3489	1.1106	0	1.5918	11.689	6.8614	0.27613	3.227	30.823	11.829	1.0562	0	10.812	3.6971	14.231	11.687	4.8173	1.5249	0.46212	4.554	1.1221	5.1598	22.679	5.2783	0	10.837	0	16.965	9.6844
0	0	0	0	5.515	0	3.4621	0.32529	9.1601	15.917	2.5519	0	0	37.125	0	4.8518	0.25803	0	2.1167	8.0541	8.3546	0	0.93991	30.138	10.892	1.0913	0	9.159	3.9731	13.676	12.164	0	2.9388	0	6.187	0	4.2612	18.173	5.5856	0	9.0952	0	16.039	9.6733
0	0	1.4058	0	4.0127	0	3.0666	0	7.1753	12.388	2.8338	0.81495	0	36.067	0	5.6698	2.2328	0	0.68552	9.1001	9.1204	0	0.21337	30.223	9.6546	3.8964	0	8.475	0	14.392	8.7929	1.4433	0.70789	2.9557	5.4892	0	4.2902	20.555	3.317	0	10.869	0	13.482	9.4065
0	0	0	0	4.4433	0	2.8274	0	4.6903	11.435	0.85618	0	0	33.988	0	1.1665	1.1729	0	1.611	5.6708	9.478	3.2149	0	28.271	7.0859	4.3143	0	10.918	2.3426	20.931	14.052	0	3.458	0	6.2544	0	2.1388	21.685	2.5265	0	9.6874	0	17.893	11.251
0.11515	0	0	0	3.779	0.22293	0.86327	0	5.6703	9.7703	2.2597	0	0	32.253	0	3.0948	1.2927	0	1.069	7.9977	13.833	0	0	28.189	8.5353	4.1351	0	9.0381	2.4322	28.933	9.3942	0	13.785	3.0403	12.055	0.38417	1.9471	20.895	8.44	0	7.3607	0	18.895	9.2538
0	0	0	0	4.3212	0	1.6799	0	2.28	7.1218	3.3041	0	0	30.329	0	0	1.514	0	2.4201	8.1147	16.039	0.48121	0	26.089	5.89	10.336	2.4303	10.731	4.9834	41.379	9.118	0	17.913	1.8349	14.623	0.62276	2.2343	19.684	3.9979	0	10.076	0	14.382	10.424
0	0	0	0	4.6645	0	1.2037	0	2.8833	7.8083	4.4363	0	0.074074	28.308	0	1.3899	1.15	0	0.27715	6.8818	15.261	0	0	25.413	6.2687	0	0.84359	7.2783	0.82584	48.733	7.8404	0	14.995	1.1369	11.912	0	1.3521	20.855	0.74841	0	6.6133	0	12.395	13.264
0	0	0	0	5.2274	0	0	0	2.4846	6.2007	2.6991	0	0.15257	25.495	0	2.6335	0.18552	0	2.2709	9.1688	14.527	0	0	24.345	11.729	6.2594	1.4463	10.165	0.95251	43.114	3.2912	0.80741	17.146	0	10.509	0	0	22.785	0	0	7.9947	0	13.584	11.243
0	0	0.26955	0	4.8252	0	0	0	1.6244	4.9901	1.5869	0	0.10597	24.318	0	0	0.76325	1.0899	1.3835	4.9695	12.672	0	0	23.149	6.1314	2.7018	1.4131	11.235	2.3197	39.243	3.7686	5.4765	17.591	1.6494	8.9464	0	0	21.694	0	0	7.7632	0	11.572	13.275
0	0	0	0	4.2282	0	0	0	2.0613	5.9757	0.063328	0	0	25.715	0	1.5503	1.1485	0.0091645	2.8964	4.5699	10.897	0	0	21.921	5.988	4.3346	1.3103	7.2214	0.83697	39.948	2.6588	0.8548	14.563	0.093482	8.5429	0	0	23.831	0	0	7.7467	0	12.99	10.695
0	0	0	0	2.5369	0	1.8392	0	1.1101	3.584	2.627	0	0	25.681	0	0.49894	0.090237	0	0	4.2015	11.129	0	0	20.439	10.18	2.8978	0.68663	8.824	0	35.107	7.2705	2.5016	12.695	0	8.1202	0	0	23.845	0	0	7.282	0	9.7005	9.9072
0	0	0	0	4.1397	0	2.0312	0	2.8125	4.0652	3.706	0	0	23.194	0	0.26229	1.2666	0	0	4.7742	8.8733	0	0	21.546	7.4542	11.136	0.08893	7.4957	0	33.249	6.047	0	9.4014	0	8.115	0	1.3852	23.088	0	0	4.5714	0	9.3317	9.3822
0	0	0	0	3.4638	0	1.9182	0	1.6047	2.4722	4.6128	0	0	21.091	0	0	0.054979	0.41347	1.1342	7.4588	6.4307	0	0	16.756	10.824	1.5637	1.0708	11.439	0.10836	29.014	7.4355	0	9.1229	1.7123	6.764	0	0	23.628	0	0	7.59	0	8.0902	6.4904
0	0.18662	0	0	3.2806	0	3.2904	1.4026	0	2.6134	4.6949	0	0	20.818	0	0.89735	0.64915	0	1.5155	5.3793	6.9539	0	0	16.405	7.522	4.167	0.64969	9.5028	0	22.43	11.7	0	6.8709	1.5641	5.5372	0	0	22.247	0	0	6.5854	0	9.3052	9.6362
0	0.10817	0	0	3.2776	0	0.33122	0.44972	2.0287	2.2269	4.9801	0	0	18.024	0	1.3363	0	0	1.5648	5.6013	6.2885	0	0	15.173	6.2158	3.0913	0	10.759	1.1379	22.691	11.154	0	3.3318	1.3654	2.9442	0	0.44662	23.776	2.537	0	3.1502	0	10.061	8.7988
0	0	0	0	2.4752	0	2.1032	2.5927	0	1.4313	6.587	0	0	17.871	0	0.31903	0	0	1.8077	6.2108	5.7412	0	0	12.44	8.7891	7.2042	0	7.8914	0	20.807	11.972	0.05252	2.9929	0.624	2.2133	0	0.47453	24.772	3.3893	0	4.6414	0	10.776	8.8611
0	0	0	0	3.2549	0	2.12	2.0805	0.30352	2.2298	4.4692	0	0	15.645	0	2.2747	1.9912	0	0.010809	4.9068	4.7363	0	0	10.836	9.2613	3.6747	0.24369	6.852	0.22593	13.326	7.0295	0	4.321	2.7064	5.6805	0	1.6185	22.586	4.5092	0	4.8425	0	5.8363	6.014
0	0	0	0	2.2535	0	2.156	3.2267	1.5535	2.7365	7.1713	0	0	15.139	0	0.15416	0.51985	0	2.5507	3.8993	3.0742	0	0.42009	12.108	4.1713	1.8285	0	6.9594	4.5362	17.16	12.221	0.71533	5.4478	2.8775	6.2764	0	0.25151	18.718	0	0	7.0593	0	5.7618	5.8265
0	0.45016	0	0	1.474	0	0	3.3202	0.86323	0.11366	6.1605	0	0	13.99	0	0.63789	0	0	1.5413	6.5999	2.9318	0	3.3293	14.118	8.2989	0.0097452	0	7.2357	3.1544	16.405	9.3157	5.7665	5.3657	0.030337	3.7959	0	0.080529	21.423	0	0	4.7383	0	8.3387	7.4043
0	0	0	0	2.6308	0.99563	0	6.2303	0.8775	1.3171	5.6027	0	0	12.689	0	0	0	0	2.5062	3.3799	1.9518	0	0.58318	10.2	9.8436	0	0.44751	7.0334	3.4498	17.398	5.5868	0	3.308	0.38876	2.776	0.03836	0	21.796	0	0	3.2855	0	9.758	5.0365
0.16671	0	0.15154	0	2.7279	0	0	3.8269	0	0	5.7727	0	0	11.934	0	0.61779	0	0	2.0184	7.0375	2.3982	0	2.8316	9.761	7.9242	0	0	6.4956	2.8639	16.866	5.1379	1.5228	0.48185	2.7437	3.2371	0	0	22.442	0.79284	0	6.8659	0	8.1596	5.8769
0	0	0	0	1.7644	0	0	3.9884	0.98636	0.23295	7.9391	0	0	10.796	0	0.099563	0.03741	0	1.987	3.5765	2.8606	0	3.7087	7.9179	9.5997	1.833	0	6.1528	3.6963	13.168	4.7097	2.0792	0	0.37123	2.3516	0	0.2162	25.526	1.7669	0	0.93597	0	7.4549	7.0937
0.15485	0	0	0	0.7541	0.13512	0.82001	6.0625	0	2.3278	5.8493	0	0	8.4243	0	0	0	0	1.4796	5.4297	6.5658	0	2.4323	9.6972	10.434	4.0883	1.6921	9.1326	0	8.9474	7.1287	0	0	3.1943	3.8342	0.24901	0.49516	24.311	0	0	2.7977	0	10.926	11.193
0	0.31936	0	0	3.3123	0	1.4229	1.276	1.6535	0	4.6636	0	0	9.8623	0	0.70249	0	0	2.743	5.7595	11.445	0	0	6.2564	9.8584	6.2286	4.6953	8.6881	2.6755	21.615	4.3323	1.701	6.2232	2.8837	7.9705	0	0.55156	24.841	6.1074	0	3.8634	2.3868	11.806	9.6194
0	0	0	0	0	0	1.7043	3.5742	0	0.56219	4.3484	0	0.33775	8.9506	1.2094	1.8505	0	0	0	9.8371	11.872	0.011386	1.195	5.6168	6.1491	1.6663	5.6176	11.098	2.1956	33.926	4.1344	5.2138	10.357	3.0219	12.736	4.1704	0	19.724	10.993	0	3.1096	11.063	6.5977	9.3732
0	0	0	0	0	1.9232	3.9232	1.8556	0	0	5.34	0	0.76672	7.4039	0.39248	3.2287	0	1.1979	0	3.9933	13.882	0	4.1682	3.8884	7.5214	0	5.9187	9.3616	3.4158	46.721	4.8621	3.4857	13.768	3.876	14.641	2.2869	5.1727	18.424	8.4264	0	2.7006	19.576	10.654	12.109
0	0	0	0	0	1.1382	1.5218	1.3923	0	0	5.7362	0	1.0018	5.4223	0	0	0.6402	0	1.203	5.0112	13.097	0	4.0923	2.9751	9.98	5.5171	5.5641	9.1396	6.3987	61.926	7.3641	3.1081	8.2827	6.4345	15.017	3.2182	5.056	17.525	9.3516	0	5.7979	21.807	11.908	14.317
0	0.5947	0	0	0	0	0.5063	0.54342	0	0	4.4685	0	0.63378	5.1416	0	0	0	0.81555	0.13703	9.0599	13.748	0	4.725	4.0671	10.284	0.25059	4.8536	11.109	4.3337	56.319	5.2913	2.5805	6.6339	4.2574	12.921	2.9334	3.3497	16.377	6.6387	0	4.6216	24.219	8.9612	10.754
0	0.062575	0	0	0	0.48931	0	0.53897	0	0	3.708	0	0.49332	4.1454	0.39525	0	0	0.98053	0	7.4072	16.145	0	4.8661	3.4508	9.195	2.9163	3.3781	8.4346	0	68.665	3.3733	3.562	5.1235	5.3963	10.207	0.49801	1.4824	20.74	9.673	0	2.8709	21.672	6.5415	11.557
0	0	0	0	0	1.213	2.6072	0	0	0.32217	4.5391	0	0.34105	4.3871	0	0	0.34747	0	1.3156	5.0075	15.96	0	2.0094	5.5621	10.299	0.79893	4.0683	8.4856	0	71.469	6.3864	0	8.9489	6.8884	9.5609	2.3511	1.7935	19.821	14.775	0	1.0652	24.398	10.899	13.236
0	0	0	0	0.16122	0	0.74394	0.40609	1.3567	0	4.3877	0	0.38672	3.1039	0.21742	0	0	0	0.032401	5.0331	14.557	0	9.0637	2.4955	12.24	1.769	3.243	8.7816	1.832	74.6	0	0	9.5912	1.1995	13.453	0.36846	1.1862	18.364	3.4982	0	4.5841	22.389	6.6951	15.216
0	0	0	0	0	0.62972	0	0	1.1648	0	4.0388	0	0.70407	2.7519	0	0	0	0	2.8749	6.323	13.847	0	2.3235	3.7095	12.317	0.59001	2.9805	7.7484	5.9297	73.204	0	0.74431	9.1592	3.2428	15.293	5.698	0.91449	15.874	0.79185	0	0	19.339	4.4441	11.401
0	0	0	0	0	2.0036	0	0	0	0	4.26	0	0.26996	3.5281	0	6.2719	1.7375	0	4.7203	7.1445	13.069	0	9.3941	3.041	14.368	4.2902	2.1542	9.1412	3.3402	73.124	0.85003	0	8.3105	0.98284	16.902	4.6759	0	16.45	6.4575	0	4.4497	16.252	8.7047	9.2177
0	0	0.31609	0	0.40737	2.8707	3.3514	2.0152	0	0	5.2428	0	0.21973	2.3096	0	6.8494	0	0	5.1175	8.0432	14.994	0	13.104	4.2572	16.612	3.7582	3.4819	10.472	4.0288	70.395	2.1046	0	3.2632	0	14.08	3.781	0.24397	18.259	8.3771	0	2.3778	14.638	5.7785	8.7081
0	0	0	0	0	0.8698	0	0	0.020223	0.18225	5.5476	0	0.62552	2.3835	0	9.3541	0.75637	0	5.1445	9.2587	15.135	0	13.15	3.236	16.554	0	3.9936	10.51	6.4933	71.956	7.8137	0.18842	6.95	2.6036	12.69	2.7311	3.9799	18.771	9.7371	0	2.1318	12.278	3.8636	9.5174
0	0	0	0	0.010549	1.678	0.9451	1.2847	1.4419	0	6.1917	0	0.59692	2.4202	0	10.189	2.7298	0	7.9548	6.9656	12.196	0.39776	15.524	3.4468	14.331	0	2.7102	9.8503	4.4595	57.963	9.515	2.5894	2.3408	4.0529	12.574	0	2.844	17.283	6.2374	0	0	10.507	5.1675	8.0041
0.014277	0.026323	0	0	0.18357	0.79221	0	0.63065	0	0	6.4437	0	0.99634	2.7809	0	5.7117	1.7044	0	3.6407	5.8376	13.353	1.2103	10.435	0.12793	17.639	0	3.302	12.724	8.7059	60.842	5.1457	0	1.431	0.83327	13.191	2.9047	4.5167	15.649	7.9304	0	0	8.4697	8.3541	7.3746
0	0	0	0	0.18003	1.3382	0	0	0	0.25186	4.6856	0	0.62731	3.673	0	5.8104	1.9516	0	6.2191	5.1085	13.032	0	11.82	3.4567	15.364	0	1.4384	12.161	5.7359	53.974	11.451	1.1613	5.6386	2.701	14.48	5.8471	2.1278	17.113	9.7242	0	0	6.3203	6.2514	6.319
0.35176	0	0	0	0	0	1.8723	1.9668	0	0.55814	6.7575	0	0.75349	2.9757	0	6.3355	3.9516	0	2.6752	6.8424	12.422	0	13.703	1.8155	15.412	0	1.2511	13.348	4.1543	48.634	3.9323	0	2.1529	1.9221	9.7764	0.81579	0	15.057	11.853	0	0.68017	4.0014	5.1833	9.9089
0.34788	0	0	0	0	0.029713	1.4137	4.2671	0	0.43559	7.4148	0	0.27996	4.788	0	5.754	2.407	0	5.8681	3.4535	10.163	0	9.666	2.0343	13.13	0	1.7315	11.394	3.5218	39.37	4.6534	0	5.1499	2.3211	12.347	1.9996	0	13.456	4.6951	0	1.4922	0.85572	0	6.7055
0.20556	0.19277	0	0	0	1.8471	0	3.7979	0.49742	0	6.616	0.74607	0.73306	3.17	0	1.8278	1.0147	0	4.7501	4.5576	7.8586	0	8.266	0	13.465	0	2.1522	11.199	5.1053	37.98	8.4007	0.51156	0.61572	2.4882	10.93	0.40772	0	15.137	2.7269	0	3.3563	0	0.62785	9.3986
0.22788	0	0.17663	0	0.27563	0.42685	0.81474	4.4382	0	0	9.5071	0	0.3976	2.9911	0	4.9025	1.351	1.0314	4.0183	4.4199	7.9144	0	7.8028	2.0465	10.119	0	0.52874	10.91	6.458	38.563	8.8878	1.4151	3.0218	3.0094	9.5509	0	0	15.705	1.3763	0	1.8623	0	1.8666	6.5264
0.40335	0	0	0	0	0.80258	0	5.0986	0	0.79188	9.9936	0	0.64075	2.438	0	2.8957	1.9404	0	3.6848	8.8732	8.0813	0	4.2213	0.69666	12.705	0	1.5259	11.187	4.8989	40.012	1.7994	2.8449	1.4052	4.2211	8.1547	0	0	14.722	3.4224	0	2.5432	0	3.5982	6.3899
0.060221	0	0	0	0	0	0	3.6749	0	1.5807	9.2918	0	0.35961	1.7955	0	3.6891	0.52614	0	4.4923	7.2828	7.0061	0	6.9822	0.46241	11.871	0.6225	1.989	8.9273	4.477	26.399	0	0.38964	1.2816	0	6.7921	0	0	15.83	0	0	3.4957	0	2.0347	7.69
0	0	0	0	0	0	0	7.118	0	0	8.5803	0	0.46074	1.0061	0	0.3201	1.3952	3.755	3.9505	6.0373	6.0328	0	0.11517	0.61818	12.808	0	1.3109	9.5563	2.0275	28.568	3.8623	0	4.0439	1.5583	5.8492	0	0	14.503	2.841	0	0.47975	0	0.82164	7.7433
0	0	0	0	0	0	0	3.6345	0	0	6.593	0	0.27069	0.90827	0	0	0	2.0483	4.4093	1.1537	6.844	0	0.25055	0	16.604	0	0.38813	9.9413	0	27.358	9.5604	0	4.576	2.2458	1.3467	0	0.019319	16.597	3.7393	0	1.1634	0	2.5821	4.8487
0.035785	0	0	0	0.013235	0	1.6925	2.1231	0	0.064092	9.0948	0	0	1.0788	0	0.40964	0.668	0	0.70298	6.993	5.8247	0	0	0.66304	15.304	0	0	10.458	0	19.527	4.7651	0.34701	10.293	2.8133	2.5254	0	0	18.056	5.3517	0	3.4596	0	4.0695	6.5039
0.80911	0	0	0	0	0.19842	0.44646	1.0835	0	2.6266	7.8551	0	0	0	0	3.116	1.0271	0	0.97828	7.8519	4.503	0	1.3356	1.3363	14.12	3.2367	0	8.1978	0	18.745	4.6775	0	20.737	1.5795	1.1505	0	0	20.626	0	0	1.9557	0	1.9432	5.4105
0	0	0	0	0.78178	0.27024	1.3336	1.2188	0	4.7214	7.9146	0	0	0.93447	1.0497	2.0287	0.59532	2.3405	0	7.0045	4.114	0	3.497	0.26913	13.595	0	0	7.1288	0	19.533	7.9837	0	23.137	3.8851	0.071883	0	0	18.375	14.79	0	0.047325	0	2.8097	6.9727
0	0	0	0	0	0	0.36851	1.4442	0.8298	5.3271	6.0338	1.0483	0	1.3712	0	0.95754	0	0	0.91265	4.6054	2.1919	1.3503	0	1.064	12.278	0	0	9.4939	6.5605	13.619	3.6981	0	19.633	1.6862	0.9028	0	0	15.311	7.6486	0	3.4134	0	3.4494	6.7119
0	0	0	0	1.0167	1.9793	0	2.7606	2.156	4.9326	6.2169	0	0	2.2734	0	0.90293	2.2961	0	0.65748	5.9166	1.1505	1.9306	0.72375	3.0902	12.254	0	0	8.7903	5.1352	6.8863	5.4755	0	18.833	2.292	1.7132	0	0	15.487	8.0515	0	0.63231	0	0.1968	5.7284
0	0	0	0	0.093024	2.1154	0	0.11293	1.7851	4.2129	4.3406	0	0	0	0	2.518	0	0.17628	0	3.4857	0.93066	0	0	3.3667	10.909	0	0	11.806	6.8349	10.981	2.4484	0	20.378	0	1.5444	0	1.1505	15.504	6.3167	0	0.40716	0	0	4.7307
0	0	0	0	0	0	0	1.9876	1.7443	3.6831	3.3427	0	0	0	0.31938	0	0.76485	0	0	2.6512	0.48164	0	0	2.5554	11.803	0	0	11.098	4.2262	10.612	3.4083	0	22.159	1.5187	1.8441	0	0	18.129	0.71583	0	0	0	1.4342	6.2803
0.41954	0	0	0	0.95651	0	0	0	1.7167	3.7135	4.2776	0	0	0.56823	0	0	0.50471	0	0	1.8471	1.5406	0	0	4.4823	9.1367	0	0	7.9646	0.19519	17.683	6.7549	0	14.813	0.58067	0.27107	0	0	18.265	7.0417	0	0.17944	0	2.7419	5.8313
0.14717	0	0	0	0	0	0	3.6713	0.53894	2.8172	3.8182	0	0	0.076652	0	0.27621	1.6724	0	0	1.7968	0.2517	0	0	4.6707	9.5723	3.7101	0	6.6022	6.1949	13.252	2.8143	0	13.315	0	1.8778	0	0	16.334	6.4504	0	0.35021	0	1.9183	4.9652
0.68702	0	0	0	0.5286	0	0	0.90208	1.1846	1.9784	4.3162	1.0023	0	0	0	0	0	0	0	1.2398	0.66953	0	0	5.9432	8.0859	0	0	7.4711	3.4916	6.1779	0	0	11.127	0	2.4479	0	0	14.764	1.1638	0	0	0	2.2422	7.3286
0.29661	0	0	0	0	0.47747	0	0	0.4902	1.2435	4.2673	0	0	0	0	0	1.526	0	0	0	1.0815	0	0	4.7187	8.2204	0	0	7.0927	6.7832	5.6099	2.9568	0	10.63	0	2.7018	0	0	15.531	1.9937	0	0	0	1.7522	6.917
0	0	0	0	1.9938	0	0	0.60176	0	0.89258	1.5874	0	0	0	0	0	0	0	0	0	0.78959	0	0	5.783	12.004	0	0	4.887	0.37425	5.8751	1.6801	0	13.776	0	1.6072	0	0	13.934	0	0	1.8392	0	0	5.3635
0.30064	0	0	0	0	0.27092	0	1.0009	0	0.77529	3.8468	0	0	0	0	0	0.41243	0	0	0	0.73232	0	0	6.2367	7.5387	0	0	4.4558	0.45725	1.7045	0.51108	0	14.592	0	1.5116	0	0	13.827	1.2342	0	0	0	0.81895	5.1233
0.003368	0	0	0	1.0734	0.19366	0	1.2742	0	0	5.2731	0.11695	0	0	0	0	0	1.4443	0	0	0	0.31391	0	5.2901	10.848	0	0	5.9438	3.6283	7.761	0	0	13.485	0	0	0	0	13.812	3.6864	0	0	0	2.7447	5.3194
0	0	0	0	0.66203	0	0	2.1879	1.3092	0.50071	4.688	0	0	0.81354	0	0	0	0	0	0.58476	0	0.77733	0	4.6544	9.0503	0	0	6.6347	2.4957	1.3011	0	0	10.15	0	1.1505	0	0	13.317	4.7576	0	0	0	0.30709	3.6367
0.3102	0.017481	0	0	0.27364	0	0	0.75895	0	0.26963	5.5955	0.057426	0	0	0	0	1.6027	0.32614	0	0	0	0	0	4.132	6.2221	0.76208	0	9.016	0	4.7699	0	0	12.014	0	0	0	0	14.425	4.48	0	0	0	0.10017	8.3523
0.31418	0.22089	0	0	0.98083	0	0	2.9796	0	0	7.5933	0	0	1.9509	0	0	0	0.75374	0.58147	0	0	0	0	2.6366	9.9057	0	0	13.083	2.3095	2.6412	1.6693	0	7.8055	0	0	0	0	13.869	5.7423	0	1.403	0	2.3396	6.1549
0.27683	0.028203	0	0	0.27342	1.8917	0	6.8571	0.30528	0	8.7595	0.42879	0	1.7803	0	0.49666	0	0.61817	0	0.78254	0	0.48561	0	2.708	10.087	0	1.5148	12.979	0	0.19388	0	0	3.8798	0.25034	0	0	0	13.362	8.6855	0	1.2403	0	0.36072	6.8506
0.36554	0.11989	0	0	2	0.1712	0	6.779	0.27672	0	10.163	1.0422	0	1.9268	0	0	1.1474	0	0	5.0065	0	0	0	2.008	9.2255	0	0.1809	12.543	1.8758	1.5292	2.8438	0	3.671	1.5044	0	0	0	13.451	11.766	0	2.5473	0	1.0867	7.2228
0.22413	0	0	0	1.0804	0.66772	0	8.1871	0	0	9.6227	0.0042779	0	2.511	0	1.0101	0.97473	0	0	0	0	0	0	3.0342	11.106	0	0.99772	11.468	2.7812	0.21869	0.28334	0	5.1558	0	0	0	0	15.072	6.1204	0	0	0	0	2.4191
0	0	0.3066	0	0	0	0	9.1721	0	0.94322	9.9177	0	0	0.36436	0	0	0	0	0	1.8017	0.63188	0	0	1.564	33.306	0	0.69152	8.8629	5.4454	0	0	0	4.1534	0.21887	0	0	0	12.471	4.6152	0	1.4369	0	0.39614	6.6276
0	0	0	0	0	0.39366	0	7.383	0	2.3646	9.9911	0	0	1.3795	0	1.048	0	1.0266	0	0.9742	0.613	0	0.46195	0	39.437	2.0005	0	9.5796	1.2684	0	0	0	1.7803	1.2811	0	0	0	10.543	4.5513	0	0	0	0	3.5962
0.20213	0	0	0	0	0	0	7.3507	0	1.7453	8.8251	0	0	1.0125	0	0	0	0	0	0	0.073218	0	0	0	35.602	0.41632	0	8.8514	1.3567	0	0	0	2.5352	0.6054	0	0	0	12.076	8.0266	0	0.23189	0	0.82475	4.7517
0.1506	0	0	0	0	0	0.85129	7.8484	0	1.2689	8.4461	0	0	2.7125	0	0	0	1.1951	0	0	0	0	0	0	42.297	0	0	6.9209	1.3969	0	0	0	1.0808	0	0	0	0	11.618	7.2435	0	0	0	0	5.3481
0.46875	0	0	0	0	0	0	4.3594	0	1.7116	8.3314	0	0	0.50542	0	0	0	0	0	0.30778	1.0957	0	0	0	61.13	0	0	6.1135	0	0	0	0	0	0	0	0	0	12.983	2.0636	0	0	0	0	4.3927
0	0	0	0	0	1.7261	0.051767	4.9807	0	1.7601	6.1293	0	0	0	0	0	0	0	0	0	1.3311	0	0	0	61.926	0	0.73994	8.1045	1.5452	0	0	0	0	0	0.027977	0	0	11.551	3.4659	0	0.48748	0	0	5.6608
0	0	0	0	0	0	0.1417	5.6849	0	0.54154	7.4306	0	0	0	0	0	0	0	0	0	0.96988	0	0	0	61.295	0	0	8.3428	0	0	0	0	0	1.5505	0	0	0	11.364	2.2847	0	0	0	0	4.2553
0	0	0	0	0	0	0	4.7513	0	0.61922	5.3342	0	0	0	0	0	0	0	0	0	0.63901	0	0	0	60.174	0	0	7.6233	0	0	0	0	0	0	0	0	0	11.026	2.7413	0	0	0	0	4.8604
0	0	0	0	0	0	0	4.1369	0	0.65639	4.3642	0	0	0	0	0	0	0	0	0.66571	0	0	0	0	58.618	0	0	6.2162	0	0	0	0	0	0	0	0	0	10.497	0	0	0.59558	0	0	5.7033
0	0	0	0	0	0	0	0.65253	0	0.64883	4.4553	0	0	0	0	0	0	0	0	0	0.38732	0	0	0	54.378	0	0	6.675	0	0	0	0	0	0	0	0	0	10.632	0	0	0	0	0	5.2956
0	0	0	0	0.4813	0	0	2.1153	0	0	5.6988	0	0	0	0	0	0	0	0	0	0	0	0	0	53.454	0	0	6.5172	0	0	0.68232	0	0	0	0	0	0	10.101	3.8397	0	0	0	0	5.7325
0	0	0	0	0.43965	0	0	0.27492	0	0.81313	3.8074	0	0	0	0	0	0	0.73845	0	0	0	0	0	0	54.328	0	0	7.4441	0	0	0	0	0	0	0	0	0	9.1324	0.06013	0	0	0	0	3.3602
0	0	0	0	0	0	0	2.129	0	0	3.2599	0	0	0	0	0	0	1.4927	0	0	0	0	0	0	53.012	0	0	5.0103	0	0	0	0	0	0	0	0	0	7.9634	0	0	0	0	0	3.4064
0	0	0	0	0	0	0	1.5037	0	0	3.226	0	0	0	0	0	0	0	0	0	0	0	0	0	60.983	0	0	4.5851	0	0	3.0709	0	0	0	0	0	0	7.7734	0	0	0	0	0	5.2756
0	0	0	0	0	0	0	0.92755	0.36186	0	1.0621	0	0	0	0	0	0	0	0	0	0	0	0	0	61.339	0	0	2.2317	0.69547	0	0	0	0	0	0	0	0	8.2756	0	0	0	0	0	7.6898
0	0	0	0	0	0	0	2.669	0	0	1.985	0	0	0	0	0	0	0	0	0	0	0	0	0	59.663	0	0	4.6263	0	0	2.4002	0	0	0	0	0	0	9.1695	0	0	0	0	0	2.8479
0	0	0	0	0.028251	0	0	0.35573	0	0	0.56675	0	0	0	0	0	0	0	0	0	0	0	0	0	55.744	0	0	3.4084	3.5823	0	0.78912	0	0	0	0	0	0	9.9639	0	0	0	0	0	6.8593
0.16221	0	0	0	0	0	0	0	0	0	0.51459	0	0	0	0	0	0	0	0	0	0	1.4274	0	0	51.553	0	0	3.2812	0	0	0.26481	0	0	0	1.6554	0	0	8.2315	0	0	0	0	0	3.456
0	0	0	0	0	0	0	1.4895	0	0.21599	0	0	0	0	0	0	0	0	0	0	0	0	0	0	51.091	0	0	3.1966	0.89217	0	2.38	0	2.2686	0	0	0	0	8.538	0	0	0	0	0	6.3291
0.36484	0	0	0	0	0	2.2435	0	0	0.36742	2.4114	0	0	0	0	0	0	0	0	0	0	0	0	0	46.139	0	0	4.1837	0	0	0.83679	0	0	0	0	0	0	8.5636	0	0	0	0	0	7.1114
0	0	0	0	0	0	0	0.73264	0.82447	0	2.0146	0	0	1.0865	0	0	0	0	0	0	0	0	0.78573	0	43.494	0	0	2.6677	0	0	1.3447	0	1.3491	0	0	0	0	9.981	0	0	0	0	0	5.4335
0	0	0	0	0.30845	0	0	0.22779	0	0.28862	3.7681	0	0	1.5097	0	0	0	0	0	1.8654	0	0.32524	1.8971	0	41.578	0	0	5.3424	1.4251	0	1.8831	0	0.79816	0	0.32592	0	0	8.804	0	0	1.8732	0	0.42244	4.6694
0	0	0	0	0.71097	0	0	0.79378	0	1.236	2.0736	0	0	1.6381	0	0	0	0	0.87318	3.3917	0	0	6.6883	0	40.809	0	0	8.1327	2.8109	0.14541	4.5632	0	4.416	0	0	0	0	11.381	0	0	1.9727	0	0	5.3782
0	0.30023	0	0	0.73322	0	0.2233	1.7706	0	1.4265	2.6182	0.49861	0	1.8938	0	0.4058	0	0	0	4.986	0	0	7.2682	0	41.477	0	0	6.3752	1.9259	0	5.1907	0	4.1608	0.6178	1.2629	0	0	11.242	0	0	0.11792	0	2.3041	8.2776
0	0.19442	0	0	0	0	0	0.72454	0.90269	0.66894	3.9885	0	0	1.179	0	0	0	0	0	1.9716	0	0	5.9371	0	37.879	0	0	4.6141	2.2131	0	6.1868	0.84918	1.6396	2.1946	0	0	0.30744	8.8129	0	0	3.3904	0	0	3.6203
0.27372	0.069492	0	0	0	0	0	0.047162	0	0.81673	3.3946	0	0	4.3772	0	0	0.41915	0	0.63748	0.66817	0	0	3.9935	0	36.574	0	0	6.452	2.4159	1.6303	4.5605	0	0	0.30472	0	0	0	9.6271	0	0	0	0	0	2.4268
0	0.33997	0	0	0.86098	0	0	0	0.49221	0.48233	2.5859	0	0	4.9987	0	0	0	0	1.9636	0	0	0	6.3945	0	30.177	0	0	4.1434	3.4795	0	4.2951	0	1.2016	1.898	0.02328	0	0	8.2125	0	0	3.8429	0	1.1614	3.8491
0.34957	0	0	0	0.7159	0	0	0	0	1.2445	4.432	1.7517	0	5.5154	0	0	0	0	0	3.9368	0	0.17149	7.9341	0	30.819	0	0	7.0688	4.4873	0	5.8205	0	2.0733	0	3.3398	0.15927	0	9.9474	0	0	1.9639	0	0.069311	7.5867
0	0	0.024929	0	0	0.19774	0	1.6267	0.0014989	0.57857	2.8447	0	0	4.1508	0	0	0.47447	0	0	5.1735	0	0.77434	4.11	0	27.5	0	0	8.9578	0.39961	0	11.806	0	1.1672	0	1.3992	0	0	7.2148	0	0	0.51005	0	5.6866	5.4322
0.1782	0	0	0	0.32319	0	0	0	0.067913	0.62121	3.9469	1.0644	0	3.3214	0	0	2.2539	0	0.11946	2.6351	0	0	5.2066	0	26.452	2.2603	0	10.397	6.8421	2.2872	14.689	0	4.2159	0	3.0051	0	0	9.9672	0	0	0.27528	0	6.51	6.8524
0	0	0	0	0	0.4534	0	0.87317	1.0146	0.47208	2.5977	2.0752	0	2.7721	0	0	1.5216	0	0.30145	1.391	0	0	7.8721	0.29222	25.952	0.34075	0	10.194	4.1936	0	15.186	0	1.0022	0	3.7691	0	2.8501	6.2327	0	0	0.23387	0	4.9905	5.047
0.57357	0	0	0	0	0.66709	0	0	0	0	2.4245	3.5973	0	3.4149	0	0	2.5134	0	0	1.6595	0	0	5.949	0.4435	20.656	0	0	11.799	1.7632	0	28.302	0	0	0	5.6777	0	0	8.3012	0.75038	0	2.6565	0	0.39614	5.943
0	0.36473	0.11027	0	0	1.6535	0	0	0	0	3.9281	5.8032	0	4.0518	0	0	2.6118	0	0	0.78976	0	0	7.9342	0	20.816	0	0	10.367	0.9398	6.2263	32.865	0.49792	3.2433	0	4.8974	0	0	11.249	0	0	2.497	0	6.0334	3.5193
0	0.01621	0	0	0	0.71178	0	2.4791	0	1.47	0.94465	3.4349	0	3.1314	0	0	3.3379	0	0	0.83484	0	0.81863	4.7352	0	21.088	3.6571	0	10.345	0	14.69	35.856	0	3.664	1.0516	5.1218	0	0	10.03	2.4193	0	3.4297	0	7.1088	6.9376
0	0	0	0	0.54099	0.91463	0	0.26699	0	0	0.63516	4.6094	0	3.7228	0	2.4044	3.2187	0	0	0	0	0	4.1599	0	17.815	0	0	12.624	0	11.218	34.67	0	0	0	5.176	0	0	7.9305	0	0	0.20942	0	5.0523	6.6349
0	0	0	0	0	0	0	0.16182	0	0	1.0266	4.186	0	3.2202	0	0	3.0049	2.3412	0	0	0	0	3.6607	0	16.915	0	0	13.249	0.34505	6.1582	36.203	0	0.17095	0.57721	3.3716	0	0	10.184	0	0	1.3482	0	2.8866	4.1365
0.10251	0	0	0	0	0	0	0.13716	0	0	1.9722	3.4502	0	1.5293	0	0	3.4566	0	0	0	0	1.3371	0	0	15.317	0	0	13.27	0	3.5832	30	0	2.2978	1.0252	2.1815	0	0	7.9102	0	0	4.7516	0	8.057	7.3902
0	0	0	0	0	1.5141	0	0	0	0	2.1123	3.702	0	2.435	0	0	3.5638	0	0	0	0	1.3877	1.0919	0	14.223	0	0.3264	13.34	3.7597	8.9712	31.28	0	4.7642	0.38427	2.8829	0	0	9.4656	3.4839	0	0	0	5.9468	8.2655
0	0.014228	0	0	0.49953	0.30632	0	0	0	0	0	4.0028	0	1.5845	0	0	4.5738	0	0	0	0	1.4125	0.53783	0	14.388	0	0.4254	12.195	1.9435	0	29.117	0	9.4056	0	2.5079	0	0	10.345	0	0	4.478	0	10.016	6.3979
0	0.28916	0	0	0	0.32061	0	0.48272	0	0	2.1581	0.50188	0	1.406	0	0	3.4708	0.038706	0	0	0	1.88	0	0	14.973	0	0.37713	11.157	1.5401	1.4799	28.565	0	7.5407	0	1.1376	0	0	9.2839	2.9372	0	0.9181	0	8.0163	6.1933
0	0	0	0	0	0.69138	0	0	0	0	3.1813	2.1927	0	0	0	1.2756	2.2318	0	0	0	0	1.4385	0	0	14.811	2.797	0	13.16	2.053	3.816	26.285	0	10.572	0	0	0	0	9.594	4.6181	0	2.387	0	14.139	8.482
0	0	0	0	0	0.9428	0.56513	0	0	0	3.5479	0.93392	0	0.29961	0	0	1.7614	0	0	0	0	0.19293	0	0	13.523	0.53565	0.18413	7.4102	0.40499	4.3153	22.846	0	10.542	0	0.27528	0	0	8.2694	0	0	1.4687	0	12.231	6.406
0	0.11349	0	0	0.43615	0	0	0	0	0	2.9724	0.46211	0	0	0	0	3.0411	0	0	0.92851	0	3.6832	0	0	14.229	1.2134	0	12.314	0	0	21.314	0	12.008	0	0.38005	0	0	11.223	0	0	0.96693	0	10.45	5.0357
0	0	0	0	0.55417	0	0	0	0	0	2.185	2.0368	0	0	0	0	3.4636	0	0	0	0	2.2658	0	0	12.247	0	0	10.8	0	1.2987	22.006	0	13.315	0	0.57605	0	0.12218	9.9615	0	0	1.4118	0	7.452	8.5372
0	0	0	0	0	0	0.68866	0	0	0	0.75689	2.7015	0	0	0	0	3.9453	0	0	0	0	2.5788	0	0	13.334	9.8707	0	9.6076	0	1.0459	19.073	0	14.242	0	0.54536	1.1723	0	10.928	0	0	2.3418	0	9.2041	9.7311
0	0	0	0	0	0.45056	0	0	0.51678	0	3.3994	1.5685	0	0	0	0	4.109	0.64785	0	0	0.70652	3.4452	0	0	11.581	0	0	12.158	0	0	17.021	0	14.625	0	3.7091	0	0	8.8838	0	0	2.9483	0	4.9164	10.743
0.1642	0	0	0	0	0	1.788	0	0	0	1.8452	1.0656	0	0.15022	0	0	3.9658	0	0	0	0.62306	4.0359	0	0	10.107	0	0	8.9042	0	0	17.714	0	13.476	0	4.0708	0	0	11.5	0	0	1.7422	0	8.3716	11.413
0	0	0	0	0	0	0.59395	0	0	0	3.1679	1.3164	0	0	0	0	3.975	0	0	0	0.42746	2.3579	0	0	10.688	0	0	11.605	0.40576	0	16.502	0	18.912	0	4.9897	0	0	10.396	0	0	0	0	8.5176	9.2818
0	0.14119	0	0	0	0	0	0	0.78062	0	2.2441	0.43639	0	0	0	0	2.7197	0	0	0	0.74215	0.16803	0	0	8.0746	0	0	11.113	0	0	18.861	0	17.926	0	4.4121	0	0	8.9814	0	0	1.1127	0	6.7158	10.304
0	0	0	0	0	0	1.3391	0	0	0	2.3102	0	0	0	0	0	2.4161	0	0	0	0	1.4846	0	0	8.2274	0	0	7.8227	0	0	12.868	0	20.499	0	3.3069	0	0	9.0452	0	0	0	0	8.5497	9.1317
0	0	0	0	0	0	0	0	0	0.17693	3.507	0.78812	0	0	0	0	3.0593	0	0	1.9808	0.97068	0.22935	0	0	12.458	2.6973	0.096548	9.3851	0.58712	0	13.963	0	16.004	0	1.6318	0	0	10.867	0	0	1.1815	0	4.5268	6.8836
0.25129	0	0	0	0	0	0	0	0	0	1.9295	0	0	0	0	0	3.5658	0	0	0	1.0404	0.99328	0	0	11.809	7.5498	0	11.328	1.5636	0	13.478	0	12.931	0.25168	0	0	0	13.611	0	0	3.1538	0	10.054	8.9907
0	0	0	0	0	0.41844	0.28823	0	0	0	1.5199	0	0	0	0	0.62411	1.2572	0	0.15137	0	0.39992	0	0	0	7.4435	0	0	9.9051	0	0	11.825	0	11.144	0	2.3064	0.35332	0	8.59	1.0271	0	3.1327	0	10.199	8.7486
0	0	6.5782e-05	0	1.6172	0	0	0	0	0	1.5374	0	0	0	0	0	3.5974	0	0	0.49759	0	0	0	0	7.7995	0	0	9.2428	3.0522	0	13.445	0	11.336	0	0.78207	0	0	10.596	0	0	0.94449	0	6.8379	9.016
0.058939	0	0	0	0.045048	0	0	1.4759	0.88195	0	2.813	0.9779	0	0	0	0	3.3675	0	0	0	0	0	0	1.0242	10.273	2.5489	0.84621	10.904	4.3809	0	15.597	0	9.2775	0.40449	0	0.76511	0	10.403	0	0	0.43646	0	9.0781	7.9806
0	0	0	0	1.0464	0	0	0.4855	0	0	3.6321	0.95263	0	1.8311	0	1.5771	2.4346	0	0	0.3748	0.50095	0.011917	0	1.9979	9.3485	0	0	12.924	1.2668	0	15.66	0	9.8598	0	0	0	0	12.549	0	0	4.842	0	9.974	8.7271
0	0	0.35247	0	1.8961	0.80771	0.96418	0	0.14361	0	4.2194	2.1282	0	4.3705	0	0	2.4183	0	0	0	0	0	0	11.934	5.2622	0	0	10.881	0.0072701	0	10.706	0	7.2223	0	1.9597	0	0	7.7365	0	0	0	0	3.7125	6.451
0.21763	0.009096	0	0	4.3835	0	0.40361	0.21758	0	0	3.8491	0	0	6.9252	0	2.0613	1.1598	0	0	0	0	0	0	22.62	5.2487	0	0	8.8082	3.3638	0	7.7674	0	5.1746	0	2.2389	0	0	11.405	1.9941	0	0	0	4.4032	8.1608
0.47708	0.020733	0	0.16142	4.7846	2.023	1.6196	0	0	0	3.3181	0	0	7.9532	0	1.8224	2.5585	0	0	0	0	0	0	32.596	3.1082	0	0	9.6764	3.8694	0	8.8796	0	1.9436	0	1.8243	0	0	8.4218	0	0	2.1168	0	2.6984	6.0665
0	0	0	0	7.6817	0	0	0	0	0	3.6386	0.30736	0	10.496	0	3.42	2.9287	0	0	0	0	0	0	36.966	4.3392	0	0	13.052	3.2267	0	7.3902	0	3.7683	0	1.6065	0	0	8.4452	3.7259	0	0.16406	0	2.5938	8.7009
0	0	0	0	4.5214	1.4331	0	0	0	0	5.699	0	0	9.5025	0	3.0742	2.4726	0	0	0	0	0	0	37.622	4.5093	0	0	10.924	3.5536	0	6.2933	0	5.1902	2.0381	0.29059	0	0	7.6218	3.3605	0	0.96643	0	1.8388	9.6331
0.10197	0	0	0	5.3979	0	1.509	1.5512	0	0	5.6575	0	0	8.2433	0	3.4143	2.6504	0	0	0	0	0	0	42.06	4.2732	1.4266	0	12.152	6.3111	0	9.8547	0	4.4114	1.0608	0.80637	0	0	7.1209	2.5218	0	1.0712	0	1.1446	9.5332
0	0	0	0	6.6988	0	1.0534	1.3081	0	0	4.5811	0	0	8.3529	0	1.5286	1.7528	1.0499	0	0.65694	0	0	0	44.639	3.9076	0	0	11.529	1.646	0	5.8045	0	3.8508	0	0	0	0	9.0552	3.7475	0	1.7856	0	3.7745	5.8374
0	0	0	0	4.9277	0	0	2.5638	0	0	5.8849	0	0	8.373	0	1.8835	4.0487	0	0	0	0	0	0	40.524	3.9082	0	0	15.167	4.8635	0	4.4448	0	1.0083	0	0	0	0	8.395	0.85998	0	3.0884	0	0	5.1037
0	0	0	0	6.0785	0.39544	1.4514	3.6565	0	0	6.4347	0	0	6.6371	0	2.2778	2.8774	0	0	0	0	0	0	39.304	6.8807	0	0	13.011	2.4578	0	2.6617	0	0	0.43191	0	0	0	10.516	7.4881	0	4.4595	0	3.9944	5.2881
0	0	0	0	5.6809	0	0	2.8228	0	0	7.1603	0	0	4.161	0	3.2644	3.1413	1.0308	0	1.3393	0	0	0	35.381	7.5722	0	0	12.656	0.2121	0	6.2858	0	1.3963	0	0	0	0	10.554	4.4789	0	4.8041	0	2.1678	5.1953
0	0	0	0	7.504	0	0.3321	2.6897	0	0	6.2518	0	0	4.6623	0	1.9332	3.3531	0	0	2.4883	0	0	0	38.831	8.9866	0	0	15.737	0	0	10.607	0	0.24808	1.4427	0	0	0	11.526	6.3072	0	1.6228	0	2.6346	6.8155
0	0	0	0	6.9399	0	1.3164	1.9729	0	0	5.8359	0	0	4.318	0	4.5214	3.5064	0	0	2.2691	0	0	0	35.539	9.8406	2.1195	0	12.78	0	0	5.7235	0	0.93794	0.29348	0	0	0	12.655	0	0	6.3617	0	2.8742	7.516
0	0	0	0	4.8406	0	0.29876	3.0224	0	0	6.4042	0	0	2.2839	0	0.71812	3.059	0	0	0	0	0	0	34.735	9.5361	0	0	14.809	0	0	5.7152	0	0	0	0	0	0	11.968	0	0	2.2563	0	0	5.5974
0	0	0	0	6.5455	0	0	1.1701	0	0	5.1353	0	0	1.531	0	0.83274	3.513	0	0	0	0	0	0	33.988	7.5887	0.17899	0	16.198	0	0	9.2455	0	0	0.86955	0	0	0	9.8459	4.8676	0	2.9082	0	1.9367	6.8635
0	0	0	0	5.7118	0	2.0254	1.7266	0	0	3.3954	0	0	2.3252	0	1.6552	1.7217	0	0	0	0	0	0	32.237	8.4949	0.39179	0	13.064	0	0	8.2884	0	0	0	0	0	0	12.981	4.2254	0	3.4284	0	0.27977	5.6796
0	0	0	0	7.005	0	0	2.3099	0	0	3.2092	0	0	2.5268	0	3.781	4.488	0	0	0	0	0	0	28.3	6.4693	0	0	13.964	0	0	1.6373	0	1.1602	0	0	0	0	10.378	0	0	3.023	0	0	7.3439
0	0	0	0	4.6177	0	0	3.951	0	0	3.8251	0	0	1.5659	0	3.3946	4.6556	0	0	2.4448	0	0	0	28.148	4.4355	0	0	11.193	0.18828	0	1.7415	0	3.1133	0	0	0	0	8.9624	0	0	2.9023	0	0	7.8195
0	0	0	0	3.4858	0	0	0.58249	0	1.6977	3.154	0	0	1.337	0	2.1279	3.5984	1.032	0	0	0.96712	0	0	26.467	7.2118	0	0	12.585	0.30124	0	5.4716	0	4.7272	3.1464	0	0	0	12.533	0	0	2.489	0	0.45634	7.6489
0.033588	0	0	0	3.4083	0	0	0.54133	0	1.6989	4.3915	0	0	1.702	0	2.7836	3.1452	0	0	0	2.244	0	0	23.393	6.516	0.32683	0	13.75	1.719	0	3.3585	0	2.2812	0.48231	1.8394	0	0	8.1753	0	0	2.3249	0	1.3819	11.923
0.28244	0	0	0	3.2192	0	0	0.15793	0	2.1051	3.5607	0	0	1.8153	0	1.4425	3.64	0	0	0	4.4299	0	0	21.08	8.6803	0.92279	1.3398	13.029	1.9528	0	6.7695	0	6.9317	0	3.0585	0	0	9.6018	0	0	1.3607	0	2.2522	8.2294
0.034229	0	0	0	1.6247	0	0	1.6492	0	0	4.0085	0	0	1.7062	0	0	3.0143	0	0	1.5932	6.0828	0	0	20.336	8.9255	0	1.5347	13.842	0	0	4.9281	1.9319	15.14	1.5022	3.951	0	0	12.156	0	0	5.4415	0	7.374	13.997
0	0	0	0	2.581	0	0	0.36668	0	1.0996	3.6587	0	0	2.586	0	1.8789	2.8207	0	0	0	7.2432	0	0	22.053	8.3306	2.1397	1.5631	11.229	0	0	0	1.8394	13.083	0.1627	2.7929	0	0	15.229	1.9946	0	3.8301	0	7.5871	10.452
0	0	0	0	2.8796	0	0	0.038076	0	0.19169	4.0533	0	0	3.8614	0	1.8909	2.9954	0	0	1.6022	6.2753	0	0	17.86	9.9402	0	1.3871	9.644	0	0	9.4164	0	10.629	2.9549	3.0064	0	0	14.961	3.2968	0	5.1855	0	2.984	11.923
0	0	0	0	2.1353	0	0.77793	1.682	0	0	3.6768	0	0	1.5832	0	1.1606	3.0888	0	0	0.76758	5.2946	0	0	18.093	6.5987	3.5202	1.4383	9.3214	0	0	0.49342	0	11.222	1.4557	2.886	0	0	19.223	0	0	4.3217	0	2.3289	10.539
0	0	0	0	2.9686	0	0	0	0	0	1.8302	0	0	0.94904	0	0	1.4101	0	0	0	2.9513	0	0	17.586	6.1475	0	1.9046	9.3991	0.23669	0	2.8165	0	13.621	0.40179	2.3807	0	0	16.539	0.53909	0	3.8736	0	1.2859	11.483
0	0.28983	0	0	1.4903	2.2213	1.863	0	0	0	3.6128	0	0	1.724	0	0.0051389	0.81134	1.0913	0	0.13949	3.4431	0	0	17.103	5.5397	0	1.1877	7.9427	0	0	2.777	0	9.7077	0	2.5507	0	0	16.512	1.3185	0	0.59059	0	3.4768	11.823
0	0	0	0	1.9571	3.9709	0	0	0	0	2.3981	0	0	0.78422	0	0.38272	0.17094	0	0	0	3.5412	0	0	12.526	5.4373	0	0.71054	6.6882	0	0	1.3642	0	17.321	0	1.3495	0	0	15.874	0	0	0	0	0.96274	9.0805
0	0	0	0	2.9819	3.4956	0	0.62662	0	0	2.1034	0	0	2.3591	0	0	1.7024	0	0	0	2.5176	0	0	13.101	7.9776	1.2883	0.20186	8.6689	0	0	3.3099	0	24.76	0	2.3432	0	0	17.161	0	0	0	0	0	6.6633
0	0	0	0	2.5512	4.9342	0.0033123	0	0	0	3.1013	0	0	0.1426	0	0.61379	1.173	0	0	0	3.5717	0	0	11.277	5.0356	0	0	4.3008	0	0	4.0888	0	28.037	0	2.7393	0	0	19.552	3.1659	0	3.4313	0	0	10.415
0.0065071	0	0	0	1.7483	2.2113	0	0	0	0	3.6129	0	0	0	0	1.5376	0.064541	2.5346	0	0	2.412	0	0	11.368	4.9685	0	0	4.0126	0	0	5.8658	0	30.498	1.2962	2.9006	0	0	18.323	0	0	0	0	0	12.773
0	0	0	0	0.78774	3.2649	0	0	0	0	3.3495	0	0	0.86108	0	0	0.59391	0	0	0	4.8511	0	0	9.3058	6.542	0	0.60186	5.4669	0	0	7.3136	0	36.419	0.92976	5.513	0	0	18.986	0	0	0	0	0	10.627
0	0	0	0	1.9009	2.9298	0	0	0	0	3.5784	0	0	0	0	0.20876	0	1.4692	0	0	5.526	0	0	8.685	4.7352	0	0	4.4963	0	0	8.3735	0	32.761	1.8175	3.7416	0	0	20.441	1.0129	0	0.032773	0	0	11.296
0.017664	0	0	0	1.673	1.0645	0	0	0	0	4.0172	0	0	0	0	0.61102	0	0	0	0	4.5614	0	0	9.6983	5.2128	0.25059	0	5.4815	3.0433	0	4.0831	0	31.302	0	2.8067	0	0	20.999	0.7257	0	0	0	0	10.144
0	0	0	0	2.8797	3.1837	0	0	0	0	4.5295	0	0	0	0	0	0.87421	0	0	0	4.3122	0	0	7.1559	6.5312	0	0	5.2095	0	0	6.2071	0	24.812	1.4311	1.4558	0	0	23.419	0	0	1.7068	0	2.2171	8.6944
0	0	0	0	0.74669	0.69032	0	0	0	0	2.6801	0	0	0	0	0	0.8451	1.4511	0	0	4.6359	0	0	7.84	7.1236	0	0	5.7374	0.014217	0	4.3626	0	23.651	0.89061	2.1353	0	0	25.114	3.5809	0	2.2398	0	0	10.904
0	0	0	0	2.3551	0	1.2611	0	0	0	4.2575	0	0	1.0853	0	3.3451	0	0	0	0	4.3287	0	0	6.5925	6.7539	0.25921	0	3.5881	1.2289	0	4.2767	0	20.059	1.4343	3.2474	0	0	23.406	0	0	0	0	0.96521	7.4099
0	0	0	0	0.51919	0	0	0	0	0	4.1745	0	0	0	0	0	0	0	0	0	2.4879	0	0	5.4809	7.7401	0	0	3.0295	3.5553	0	2.9364	0	16.947	3.2141	3.4765	0	0	26.119	0	0	0	0	0.7396	6.4408
0.042008	0	0	0	1.3107	0	0.16715	0	0	0	4.4046	0	0	0	0	0.37229	0	0	0	0	1.9917	0	0	6.4226	9.7621	0	0	3.393	0.32891	0	2.2049	0	11.227	1.3524	1.2013	0	0	26.258	0.17772	0	0.81709	0	1.0055	5.5211
0.10652	0	0	0	0.89995	2.4796	0.79924	0	0	0	2.7383	0	0	0	0	0	0	0	0	0	1.0375	0	0	3.1647	5.6817	0	0	1.4107	0.28126	0	3.2953	0	8.7247	0.606	1.6913	0	0	26.213	0.88071	0	0	0	0	3.1431
0	0	0	0	0	0.93894	0	0.6011	0	0	4.4785	0	0	0	0	0	0	0	0	0	0.54428	0	0	3.4638	6.4165	0	0	3.0731	0	0	3.9905	0	11.17	0	0.49304	0	0	24.183	0	0	0.10017	0	3.5614	6.5314
0.27786	0	0	0	0.56333	0	0	0	0	0	1.9964	0	0	0	0	0.06138	0	0	0	0	1.5915	0	0	3.0909	6.3644	0	0	3.3551	0	0	5.687	0	6.2544	1.0396	0	0	0	26.183	1.1383	0	1.5335	0	0.76702	6.5385
0.44195	0	0	0	2.459	0	0	0	0	0	3.5507	0	0	0	0	0	0	4.7249	0	0	0.83864	0	0	2.3945	5.9081	0	0.82165	2.3368	0	0	1.2362	0	6.3206	1.6634	0.16235	0	0	25.24	0.78198	0	0	0	0	4.1002
0.30515	0	0	0	1.4275	0	0	0	0	0	4.2534	0	0	0	0	0	0	0	0	0.0078436	0	0	0	2.1754	6.6541	0	1.9399	2.0594	0	0	7.9799	0	3.1104	0	0	0	0	25.254	0.1323	0	0.39083	0	0	6.0111
0.55181	0	0	0	2.0767	1.2972	0.35535	0	0	0.025487	3.0649	0	0	0	0	0	0	0.69963	0	0	0.16672	0	0	3.3888	7.9084	0	0.40335	2.4948	0.82918	0	3.3253	0	8.0342	0	0	0	0	26.159	3.119	0	0	0	0	8.0625
0.82744	0	0	0	0	2.7118	0	0.80504	0	0.78331	3.6878	0	0	0	0	0	0	0	0	0	0	0	0	2.4485	5.5714	0	1.0838	4.0131	0	0	2.8604	0	6.9018	0	0	0	0	24.525	0	0	0.63805	0	0	5.7702
0.70347	0	0	0	0	0.48748	0	0.14516	0	0.81306	2.73	0	0	0	0	1.2584	0	1.0666	0	0	0	0	0	0	7.2476	0	1.3923	1.4446	1.0953	0	3.6758	0	3.4694	1.876	0	0	0	23.798	1.6507	0	0	0	1.3975	8.1656
0.70867	0	0	0	1.2095	0.53643	0	0.59029	0	0	3.8963	0	0	0	0	0.24909	0	0.22048	0	0	0	0	0	0.64324	7.0022	0	0	0.74498	0	0	0	0	1.5954	2.072	0	0	0	22.378	0	0	0	0	0	2.8599
0.46298	0	0	0	1.1315	2.3154	0	0.29477	0	2.5408	4.8563	0	0	0.52934	0	0.67791	0	0	0.46992	0	0	0	0	0	5.1323	1.693	0.3054	2.3576	0.79735	0	5.9687	0	7.6405	0.69241	0	0	0	21.14	0.84221	0	0	0	0	2.8869
1.0316	0	0	0	1.0716	1.4531	0	0	0	1.2003	4.835	0	0	0	0	1.5224	0	0	0	0.35991	0	0	0	0.77761	5.2581	4.1893	0	2.0505	0.55792	0	1.3468	0	5.7863	0	0	0	0	24.489	0	0	0.78332	0	3.0305	4.2675
0.87722	0	0	0	1.5033	2.4042	0	0	0	1.1646	4.8861	0	0	0	0	0	0	0	0	0.97272	0	0	0	0	9.0954	6.4458	0.48353	3.5257	0	0	6.5237	0	0.54845	1.0708	0	0	0	24.061	0	0	1.9955	0	2.6148	5.5537
0.64836	0	0	0	0.72513	0.10245	0	1.5856	0	14.525	4.2302	0	0	0	0	3.4783	0.72349	0	0	0.84149	0	0	0	0	7.5563	0	0.73291	3.1503	0	0	4.2297	0	7.0235	3.5999	0	0	0	23.855	1.1046	0	3.2398	0	1.2723	5.0597
0.24411	0	0	0	2.2713	0	0.7517	1.768	0	34.676	6.8987	0.15856	0	0	0	2.7559	0	0	3.1227	2.4107	4.1857	0	0	0	7.6503	0	4.0983	0	0	0.91319	4.8927	0	15.101	4.9297	0	3.4992	0	24.643	10.412	0	5.3107	0	1.434	8.2129
0.7251	0	0	0	2.5619	0.3683	0.73907	0	0	39.929	5.6256	1.4853	0	0	0	0.68654	0	0	2.1171	0	4.5961	0	0	0.27051	10.632	0	5.3436	0	0	0.81998	1.9893	0	25.068	3.388	2.5821	5.1726	0	24.04	8.6341	0	3.0449	0	1.5753	12.424
1.1412	0	0	0	1.8376	0	0	0	0	39.982	7.1834	0	0	0	0	2.1237	0	0	3.9062	0.23431	5.8985	0	0.13174	0	25.668	0	6.492	0	0	0	4.148	1.3738	30.503	5.6648	1.7509	3.0623	0	24.216	10.389	0	5.1361	0	0.2054	12.235
0	0	0	0	2.1812	0	0.30095	0	0	37.029	6.2118	1.5752	0	0	0	0	0	0	3.8894	0	5.986	0	0.90157	0	30.796	0	6.0292	0	0	0	2.2238	0	41.544	1.9032	0.80049	3.3147	0	22.595	12.539	0	2.632	0	2.2664	14.579
0.45869	0	0	0	1.0285	0	0	0	0	33.519	7.5156	0.55469	0	0	0	0.63677	0	0	4.9786	0	2.6438	0	2.254	0	28.17	0	4.7307	0	0	0	0	3.0575	50.579	4.0866	4.1952	0	0.89682	19.094	5.6675	0	0.77882	0	0	16.843
0	0	0	0	0.12369	0	0	0	0	30.618	6.7953	0	0	0	0	0.22875	0	0	1.1169	0	1.4618	0	0	0	24.658	0	4.2145	0	3.2774	0	0	3.0156	48.348	4.655	1.0418	0	0.43538	18.182	7.2199	0	1.1442	0.99127	0	11.27
0	0	0	0	0	0	0	0	0	28.108	4.4668	0	0	0	0	2.9104	0	0	3.2143	0	2.321	0	0	0	24.448	0	4.4924	0	0	2.4332	0	0	50.12	2.6356	0.047377	1.1013	0	17.144	3.5648	0	2.1635	0	0	11.864
0	0	0	0	0	0	0	0	0	24.685	6.3329	0	0	0	0	3.4914	0	0.16496	2.3452	0	3.5853	0	0.27561	0	25.14	0	6.1887	0	0	0	0.32395	2.0427	50.356	2.5861	0	0	0	19.779	6.1512	0	0	3.6347	0	13.223
0.41151	0	0	0	0	0	0	0	0	22.751	5.7511	0	0	0	0	0.9755	0	2.1145	6.8527	2.8733	4.3892	0	0	0	23.939	0	5.1211	0	0	0	0	0	47.608	3.7544	1.8588	0	0	20.453	7.0714	0	4.6604	3.5676	3.3413	16.096
0.19403	0	0	0	1.185	0	0.18689	0	0	22.257	3.6431	0	0	0	0	2.9389	0	0	5.6452	0.70856	4.8484	0	0	0	25.508	1.2665	4.8659	0	0.0239	0	0	0	50.063	5.2924	1.4238	0.65489	0	19.528	3.3883	0	2.0548	2.8134	1.4022	12.834
0.05235	0	0	0	0.068082	0	0	0	0	23.37	5.0331	0	0	0	0	0.32296	0	0	7.4186	0.63405	3.5555	0	0	0	25.112	0	4.7349	0	0	1.0025	0.28069	2.9328	46.711	0.89948	2.7951	0	0	17.429	0	0	3.3205	3.9227	3.4013	12.813
0	0	0	0	0	0	0.1825	0	0	21.387	5.1966	0	0	0	0	0.15202	1.9754	0	5.7418	0.32416	4.469	0	0	0	23.19	0.44483	3.5629	0	0	0	2.2041	1.3605	44.39	2.6497	0.75906	0	0.081323	17.437	3.1889	0	0	0	0	12.797
0.29575	0	0	0	1.3158	0	0.049574	0	0	21.549	6.1944	0	0	0	0	2.4879	0	0	6.1183	4.8848	2.7092	0	0.17781	0	25.887	0	3.937	0.42926	0	0	3.7872	2.5905	39.056	4.4857	1.4433	0	0	18.152	2.0293	0	4.3965	0	0	13.85
0	0	0	0	0.087043	0	1.8977	0	0	21.531	6.5101	0	0	0	0	1.2863	0.21306	0	2.701	4.0271	2.8258	0	1.6793	0	23.104	4.2382	2.7748	1.0306	0	0.1131	3.1152	0.86587	35.533	4.4603	0	0	0	16.861	3.3502	0	3.8246	0	1.0434	11.395
0	0	0	0	1.7772	0	0	0	0	18.304	5.352	0	0	0	0	1.875	0	0	3.4148	3.2056	4.1086	0	5.1911	0	22.655	3.3378	2.7202	0.68831	0	0.18176	0	2.7036	32.294	3.306	3.9783	0	0	18.011	0	0	8.3267	1.2356	2.1836	12.788
0	0	0	0	1.9514	0.59029	0.70797	0	0	16.604	5.2066	0	0	0	0	0.466	2.0832	0	4.9881	4.2558	4.035	0	27.048	0	22.206	3.1572	1.3956	5.8686	0	2.1509	2.2941	2.6977	35.204	3.4058	3.9017	0	0.062678	17.771	0.34952	0	7.3603	0	0	10.137
0	0	0	0	0.70516	0	0.1303	0	1.1795	15.837	6.4892	0.24579	0	0	0	3.0869	0.063345	0	2.8634	3.4196	4.0097	0	39.331	0	19.562	0	1.7318	1.1624	0	2.1384	0	3.5362	29.468	0	4.9396	0	2.5126	16.643	0	0	4.6359	0	0	12.298
0	0.13738	0	0	0	0	0	0	1.4089	13.982	6.9448	0.27013	0	0	0	2.0392	1.6029	0	4.2703	6.219	2.0751	0	40.842	0	20.559	0.86812	1.569	1.6999	0	0	2.24	2.1609	26.916	1.2961	5.9158	1.7362	0	14.121	0	0	3.6718	0	0	10.557
0	0	0	0	0.011847	0	1.7348	0.21773	0	12.262	7.5259	0	0	0	0	0	0	0	4.3476	5.3423	2.2249	0	40.782	0	19.724	0.42163	0	5.6554	0	0.76425	0.12622	0.61046	21.194	3.4653	5.1322	1.2041	0.50255	16.371	0	0.19749	7.2863	0	5.9481	11.572
0	0	0	0	0	0	0	0	0	11.714	9.183	0	0	0	0	1.2043	0	0	4.6766	5.7666	3.1568	0	37.42	0.38009	22.331	2.3548	1.962	5.5236	0	0	1.0313	1.938	23.286	5.1743	1.1118	0	2.1659	16.214	3.3025	0.37909	8.2774	0	2.4648	12.401
0	0	0	0	0.36701	0	0	4.7131	0	21.51	8.8861	0	0	0	0	2.1808	0	0	4.3827	8.5059	5.4794	0	31.028	0	30.455	1.1106	1.9951	3.814	0	1.1248	4.9193	3.1103	20.18	7.3265	2.2403	0	0.072992	14.93	2.051	0	7.8799	0	1.0193	11.749
0.076511	0	1.1488	0	0.075844	0	0.82594	2.8097	0	35.342	10.368	0	0	0	0	1.9063	0	0	5.3347	6.78	5.1853	0	31.136	0	41.233	0	2.3889	4.7157	0	1.871	0	1.0536	19.195	9.5037	4.2829	0	0	16.356	7.0897	1.2888	5.4592	0	2.3888	8.2013
0	0.01123	0	0	1.7978	0	0	3.7139	0	42.646	8.5642	1.3284	0	0	0	3.1247	0	0	5.881	10.394	6.3629	0	25.547	0	36.338	0	1.5772	1.9476	0	0	6.2863	0.30097	16.011	7.5067	5.6022	0	1.7066	14.726	6.2548	1.5632	4.6038	0	1.2436	6.4473
0	0	0.69317	0	0	0	0	4.2704	0	41.281	8.3117	0.65445	0	0	0	2.7352	0	0	5.7266	8.4187	5.6767	0	28.179	0	38.409	0	1.4288	1.7519	0	0	1.1241	1.5269	15.977	5.7651	5.4261	1.6089	0	12.777	3.9825	0.9847	4.7992	0	0	7.082
0.55136	0	0	0	0	0	0	3.8932	0	38.88	7.0469	0	0	0	0	2.2255	0	0	3.4153	6.582	6.5656	0	28.143	0	35.459	0.29766	4.1113	5.6076	0	0	5.8921	2.5025	11.403	7.3517	2.665	0	1.8716	14.668	10.471	1.9875	4.376	0	1.6467	7.2823
0	0	0	0	0	0	0	3.362	0	37.058	8.323	0	0	0	0	2.3598	0	0	2.4075	2.7807	6.1456	0	25.451	0	33.13	0	3.4064	1.8071	0	0	4.1361	1.8861	9.1991	6.2157	1.9909	0	0.73511	14.409	9.9585	2.1842	2.6306	0	3.0802	8.4167
0	0	0.26984	0	0	0	0	3.4031	0	32.686	9.3	0	0	0	0	0.28513	0	0	2.9349	7.9871	5.9899	0	27.67	0	31.109	0	2.8659	4.2395	0	0	8.4228	2.2846	10.478	6.3332	3.3182	0	0.23167	14.114	8.8157	2.1007	5.9434	0	0	7.8102
0.4489	0	0	0	0	0	1.5719	2.9979	0	29.987	8.4274	0	0	0	0	0.49376	0	0	1.803	3.7551	6.3623	0	25.234	0	27.126	4.2363	3.0083	5.4198	0	0	8.484	3.4727	4.4969	5.7417	3.1683	0	1.6363	16.338	11.044	3.0503	1.7522	0	0.040625	6.2007
0.70714	0	0	0	0	0	0	3.0263	0	26.758	8.169	0	0	0	0.65599	0	0	0	1.471	4.8422	4.8483	0	31.065	0	31.246	1.1295	3.0283	5.183	0	0	8.3897	1.1858	3.8539	5.3475	1.9086	0	1.1706	15.408	10.035	2.438	3.1527	0	0	9.5299
0.74368	0	0.3611	0	0	0	0	2.575	0	22.357	6.3695	0	0	0	0	0.56147	0	0	2.7699	5.3194	3.6306	0	27.746	0	35.578	0	2.3342	4.6233	0	0	7.9248	0	3.4085	4.5007	1.3547	0	0	14.947	6.8673	1.6913	5.2278	0	0.99585	7.8637
0.35498	0	0	0	0	0	0	4.1368	0	21.924	6.7051	0	0	0	0	2.5175	0	0	1.3137	4.1988	2.1991	0	28.273	0	35.793	0	2.0299	4.396	0	0	3.7803	0	4.9393	3.6518	0.7929	0	1.6722	15.086	4.5249	0	2.6391	0	0.019781	8.0114
0.60273	0	0.30724	0	0	0	0.64111	3.5322	0	19.039	7.4031	0.30086	0	0	0	0.32438	0	0	0.41357	2.0163	2.5558	0	25.26	0	34.396	0.086182	2.8723	5.2461	0	0	7.0968	0	3.3723	4.7449	1.3879	0	0	14.679	8.0322	0.082592	4.3718	0	0	6.9925
0	0	0.82458	0	0.13114	0	0.47939	3.6738	0	17.71	6.8471	0	0	0	0	0	0	0	0	3.2339	4.2837	0	24.903	0	35.525	0	0.15966	6.267	0	3.4374	6.8176	0	0	5.6726	0	0	1.1733	16.703	12.467	0.25432	5.6772	0	4.686	5.9457
0	0	0	0	0	0	1.4118	3.0154	0	17.43	7.9546	0	0	0	0	0	0	0	2.7363	6.4376	3.016	0	30.296	0	34.832	5.8091	2.4666	5.7064	0	1.3738	7.2953	0	0.81119	7.6598	0	0	2.8583	18.643	12.689	0.28998	5.6056	0	0.98099	7.3517
0.80901	0	0.59313	0	0.29977	0.82038	0	6.9753	0.96282	19.752	7.575	1.9162	0	0	0	1.7798	0	0	0	4.4217	2.0344	0	28.734	0	35.03	1.9492	3.9675	7.8075	0	0.24177	6.6178	1.6458	1.8781	4.9491	2.0804	0.33762	1.3225	18.051	10.876	0.70632	3.6436	0	0	9.0626
0.28239	0	0.90662	0	0	0	4.8787	8.8964	0	24.884	9.0329	0.50652	0	0.41916	0.58794	3.0409	0.35174	0	0.26242	5.0901	0.81913	0	31.205	0	32.898	6.6428	2.575	6.2117	0	0	11.247	0.53031	2.2884	3.8417	1.0523	0	0	17.02	15.358	0	8.8483	0	1.3953	9.0009
0	0	1.2145	0	0	0	2.8623	9.7687	0	27.413	10.685	0.82479	0	0	0.71268	1.1147	0	0	0.14544	7.5095	1.133	0	30.489	0	33.486	5.4758	2.9818	6.075	0	5.7943	5.867	0	0.78667	5.3067	0	0	1.1384	18.942	12.523	0	5.1793	0	3.0399	7.0464
0	0	0.35821	0	0	1.0187	1.249	12.404	0	28.12	10.119	0.59968	0	0	0.068046	5.4862	0.3353	0	2.8637	5.3472	1.1169	0	34.119	0	35.45	6.1584	3.5945	7.8694	0	4.6035	9.2886	0	5.3666	4.0635	0	0	3.6888	19.442	21.674	0.14433	8.0093	0	3.6471	11.02
0	0	1.3781	0	0.37556	1.0343	3.8781	9.86	0	26.587	9.9468	1.151	0	0	2.7927	2.0124	0	0	1.8086	8.3246	1.5836	0	37.784	0	38.599	7.627	4.6374	7.4128	0	5.3123	7.6154	0	2.8157	7.9566	0	0	2.6476	17.485	13.18	0	8.4051	0	5.2552	10.443
0	0	1.2596	0	0	2.2868	5.2827	10.248	0	25.834	8.9934	0.73215	0	0	0.9284	2.7652	0	0	1.9827	5.155	0.48828	0	35.414	0	38.657	3.5168	3.7766	6.9647	0	1.0301	3.6735	3.8493	0	6.3181	0.68382	2.717	2.0486	18.748	12.85	0	8.2123	0	4.4224	8.0214
0.014826	0	0.29048	0	0	1.3713	2.7694	11.822	0	25.105	10.382	0	0	0	0.25538	2.8253	0.53332	0	0.51794	8.7317	1.8278	0	36.954	0	32.073	5.2407	4.5289	6.2812	0	2.3264	6.832	0	0	10.013	0.91413	2.79	0.72358	20.943	12.216	0	7.422	0	3.8605	7.6158
0	0	0.78158	0	1.0083	1.965	3.7754	12.137	0	29.566	11.915	0.93406	0	0	1.6329	1.469	0	0	2.2731	9.7446	0	0	39.357	0	33.078	6.8741	3.0469	7.3089	0	1.5644	9.3301	1.35	0.811	9.6526	0	0	3.7732	23.825	18.864	0	10.424	0	7.7289	8.7272
0	0	1.0475	0	0.16022	4.3405	1.3442	14.608	1.3509	37.112	12.861	0	0	0	0	1.8548	0	0	2.8442	5.6099	0.31161	0	40.285	0	28.162	3.4366	5.083	6.1965	0	6.4168	4.3352	0	0	10.801	0.21861	0.019741	0.14202	19.905	17.703	0	9.1504	2.2796	4.2975	10.237
0.03368	0	0.88597	0	0	1.1562	1.1232	15.332	1.5105	36.725	14.352	1.6735	0	0	0	0	0	0	3.2844	9.7961	0.62544	0	42.396	0	28.33	0.32683	4.5484	8.7485	0	0	5.5854	5.0251	1.2871	8.4934	2.8387	7.5854	1.1765	19.906	11.706	0	8.4785	0	9.6859	13.137
0	0	2.1107	0	0	2.001	4.4841	17.455	3.1047	40.94	13.696	0.46299	0	0	0	0	0	0	2.4623	9.2853	0.80928	0	36.444	0	28.587	1.4187	5.8527	10.699	0	2.0638	9.3129	1.746	5.8518	10.709	1.8529	2.5664	6.044	20.739	19.349	0	5.5108	0	10.292	12.342
0.50466	0	1.6903	0	1.2607	1.2055	2.5436	15.443	0.52919	43.772	14.208	0.26974	0	0	0.50858	1.4291	0	0	1.2885	10.074	1.8933	0	38.864	0	25.822	0.22606	3.5598	8.6393	0	3.6928	4.0939	1.973	0	9.1401	2.2836	0.42062	2.0992	21.518	23.643	0	11.832	2.6565	16.3	10.167
0.76579	0	3.0795	0	0.059047	2.8317	3.0098	18.121	0.70648	42.352	13.097	0	0	0	0	3.0362	0	0	1.9176	7.8058	1.16	0	39.927	0	28.908	2.2429	3.8289	8.1616	0.75157	2.1864	6.6146	0	0.79864	8.4416	0.86743	3.6967	1.4858	19.142	21.504	0	6.605	0	13.734	9.4088
0	0	0.93582	0	1.4134	0	2.4909	17.989	0.4468	46.532	14.197	0.35266	0	0.50134	0.68119	2.6266	0	0	1.7253	3.6317	0	0	34.373	0	30.426	0	3.5683	8.1051	4.0722	2.2695	6.7693	1.3908	0	7.9205	0.49785	2.2401	1.4692	18.636	23.954	0	7.6258	0	14.373	8.6854
0	0	2.4841	0	0.82246	1.4367	3.5997	16.062	0	48.044	12.059	0.79056	0	0	0	1.3696	0	0	1.8893	7.3393	0	0	30.588	0	29.086	3.7707	2.5729	7.9974	0	0	3.7118	3.636	0.20261	8.6146	0.81951	3.7264	3.8431	19.493	21.931	0	3.8891	0	17.923	5.079
0	0	0.49525	0	0	3.5367	4.0249	14.685	0.45498	44.297	13.536	0	0	0	0	2.1112	0	0	0	3.1789	0	0	29.089	0	24.604	5.9958	2.5748	8.5369	0	0	5.049	0	0.28906	8.4233	1.096	1.4422	2.721	18.87	15.86	0	5.6065	0	17.496	11.826
0	0	0.37538	0	1.7725	3.9022	4.485	15.491	0	42.003	14.695	0	0	0	0	3.7251	0	0.89976	1.477	5.6757	0	0	27.216	0	24.535	0.48328	2.3729	11.108	0	3.1786	3.7977	1.4826	0	3.9735	0	0	0.46189	19.444	21.888	0	1.6625	0	14.57	7.3927
0.16845	0	0.44161	0	0	0	2.5016	14.132	0	42.807	13.004	0	0	0	0	1.9937	0	0	0.54992	6.4032	1.2653	0	21.563	0	22.134	2.4883	0.88893	11.596	0	4.9014	1.6855	0	0	7.5265	0	0	0.60351	20.301	18.312	0	6.4452	0	18.528	8.7244
0.51596	0	0.66219	0	0	5.3775	0	11.588	0	40.815	11.639	0	0	1.176	0	0.007173	0.769	0	0.40761	5.7531	1.3261	0	19.213	0	19.69	0	1.0381	11.773	0	1.5646	0.30276	0	0	5.3043	1.2062	1.331	1.2954	19.618	21.551	0	2.1377	0	8.0445	9.6708
0	0	0.85975	0	0	1.3039	0	11.951	0	47.582	10.889	0	0	18.663	0.13501	1.4993	0	0	2.3184	5.5315	0.31443	0	15.54	0	19.218	0.20551	0.58674	11.157	0	5.8455	3.7219	0	0	3.6086	0	0	1.8537	20.184	19.923	0	0.28869	0	11.726	9.0342
0	0	0.87263	0	0.26809	0.3298	0	11.318	0	49.618	11.378	0	0	35.1	0	6.3956	0	0	2.5322	10.366	1.9426	0	18.435	0	17.62	0	1.122	15.294	0	2.9882	7.637	0.82702	0	1.3893	0	0	2.6671	19.198	21.398	0	4.4839	0	13.623	9.6148
0.088775	0	1.3209	0	0.40969	2.3601	0	7.6537	0	45.171	10.577	0	0	50.061	0	7.3202	0	0	4.4939	4.3506	2.6144	0	19.642	0	18.512	0	0	10.77	0	2.9025	7.7857	0	2.7921	0.39011	0	0	4.3037	19.826	21.255	0	0	0	12.572	8.2645
0.30465	0	1.7814	0	0.62476	0.51119	0.83494	7.4233	0	43.011	10.227	0	0	64.122	1.9753	7.5484	0	0	8.2715	6.5524	4.0661	0	12.306	0	19.432	0	0	10.966	0	8.7846	10.443	0	3.9367	0.75548	0	0	5.7905	19.584	19.131	0	5.0515	0	12.294	7.5529
0	0	2.6839	0	0	1.5683	0	5.4952	0	38.077	6.8948	0	0	73.791	0.65889	9.2922	0	0	3.6817	2.8694	2.46	0	14.542	0	20.459	0	0	11.564	0	9.5508	17.974	3.0263	3.1889	2.5294	0	0	3.0306	17.26	15.014	0	0	0	17.163	8.106
0	0	1.9555	0	0	0.94583	0	7.6715	0	35.199	8.4909	0	0	80.27	0	6.2567	0	0	4.9451	3.4038	2.6329	0	11.779	0	19.002	0	0	12.456	0	10.4	13.473	0.30608	1.3476	0	0	0	5.106	18.933	15.435	0	1.3065	0	14.351	8.899
0	0	1.3412	0	0.7239	0	0.5668	5.8003	0	31.308	6.9665	0	0	78.433	0	8.1779	0	0	5.7412	2.7375	1.7649	0	8.9204	0	17.453	0	0	12.67	0	8.7634	15.215	0	2.7104	0	0	0	5.4626	17.76	14.475	0	4.094	0	13.02	9.3053
0	0	2.1758	0	1.1311	1.1511	0	4.794	0	29.961	4.876	0	0	74.214	0	7.2703	0	0	5.2233	2.794	1.2856	0	10.54	0	15.764	0	0	14.116	0	4.9371	14.26	0	0	0	0	0	3.6004	17.474	15.877	0	0	0	12.8	4.3585
0	0	0.75218	0	0	0	0.63325	5.2455	0	26.415	5.9747	0	0	70.526	0	5.0541	0	0	1.7462	0.24573	3.0556	0	9.8638	0	14.492	0	0	13.157	0	3.4904	11.23	0	2.2557	0	0	0	1.4394	16.163	13.259	0	0	0	11.914	6.2581
0	0	1.1183	0	0	0	0.79731	5.9179	0	22.593	7.9839	0	0	67.867	0	5.0224	0	0	2.2651	1.7908	1.9313	0	7.7894	0	17.71	0	0	14.304	0	0.47085	10.717	0	0	0	0	0	1.7384	16.322	8.6013	0	0	0	8.7344	3.8456
0	0	0.61838	0	0	0	0	2.4727	0	20.835	7.4334	0	0	65.368	0	5.4595	0	0.18113	1.6212	4.0504	4.0433	0	5.1875	0	14.042	0	0	13.674	0	0.57702	6.5044	0	0	2.0157	0	0	2.4346	19.084	12.689	0	1.4743	0	11.864	5.7488
0	0	1.8184	0	0.49016	0	0	3.6388	0	17.437	6.4143	0	0	61.939	0.86317	2.2279	0	0	1.7556	3.5554	2.9655	0	7.5931	0	15.718	0	0	11.677	0	1.1101	8.9819	0	0	0	0	0	2.336	20.275	9.4938	0	1.0253	0	9.7814	3.3517
0	0	0	0	0	0	0	3.5209	0	15.982	5.1112	0	0	58.708	0	2.928	0	0	1.4712	0	1.1235	0	2.3227	0	15.747	0	0	14.171	0	0.13272	10.325	0	0	0	0	0	0.99302	18.961	6.8936	0	0	0	10.319	5.8077
0	0	0.70105	0	0	0	0	1.2689	0	14.367	5.0196	0	0	57.134	0	0.45238	0	2.9924	1.8114	1.9378	0	0	2.7975	0	15.086	0.38052	0	12.926	0	0	6.7449	0.018757	0	0	0	0	0	18.429	9.3216	0	0.33286	0	9.7468	2.998
0	0	0.69772	0	0.95917	0	0	2.8714	0	11.934	4.8589	0	0	51.651	0	4.4054	0	0	0	0	0	0	0	0	11.628	0.61189	0	11.592	0	0	6.1083	2.1636	0	0	0	0	0.32331	16.853	8.2072	0	3.822	0	9.7844	2.1271
0	0	0	0	0	0	0	2.8026	0	11.195	5.2601	0	0	48.906	0	1.8201	0	0	0	3.5145	0	0	1.1643	0	10.771	2.3171	0	12.064	0	4.0604	8.1429	0	0	0	0	0	0	16.994	8.1603	0	0	0	4.4422	6.7485
0	0	0	0	1.2093	0	1.1122	1.3951	0	9.7758	6.3374	0	0	46.618	0	3.9339	0	0.22318	0	0	0	0	0	0	13.341	0.72204	0	9.6038	0	1.8653	3.171	0	0	0.060674	0	0	0	16.048	3.2419	0	0.82768	0	5.7157	3.1647
0.43184	0	0	0	0.85671	0	0	3.2857	0	10.513	3.8368	0	0	45.105	0	1.3733	0	0	0.116	0.48997	0	0	3.8535	0	10.724	2.2398	0	10.553	0	0	1.3765	0	0	0	0	0	0	13.576	8.2929	0	0	0	5.5634	5.834
0	0	0	0	1.0931	0	0	3.2243	0	16.51	5.8054	0	0	41.525	0	1.9795	0	0	0	0	0	0	0	0	10.847	0	0	13.653	0	0	5.7463	0.67525	0	1.387	0	0	0.70118	15.168	7.3051	0	0	0	3.7435	3.8985
0	0	0	0	0.28416	0	0.010002	2.6211	0	20.293	4.7829	0	0	40.012	0	0.11669	2.1221	0	0	0	0	0	1.0799	0	12.902	0	0	12.007	0	1.9562	6.4556	0	1.9201	2.4558	0	0	0.32807	16.381	6.6821	0	0	0	6.3833	4.8021
0	0	0.46847	0	0.25259	0	1.8368	0.91812	0	25.478	5.3816	0	0	38.448	0	0	0	0	1.7626	6.2208	0	0	0.56032	0	11.856	0	0	13.625	0	0	6.8202	0	0	4.269	0	0	0	16.277	8.8699	0	1.672	0	3.938	5.8705
0	0	0	0	2.1932	0	0	3.9411	0	24.249	4.2575	0	0	35.131	0	0	0	0	0	0.89818	0	0	3.5242	0	13.115	0	0	10.003	0	0	8.5248	2.4608	0	2.998	0	0	0	13.524	9.8655	0	0.87881	0	5.7921	5.2875
0	0	0.65001	0	0	0	0	3.1249	0	23.24	4.4881	0	0	32.885	0	0	0	0	0	3.037	0	0	0	0	12.429	0	0	8.6627	0	0	6.5781	0	0	3.4837	0	0	0	13.226	5.8821	0	0	0	0.94046	4.148
0	0	0	0	0.78382	0	0	2.4759	0	19.061	4.2616	0	0	31.699	0	0.73566	0.74576	0	0	0	0	0	0	0	10.22	2.4054	0	8.4002	1.8483	0	6.4577	0	0	1.6394	0	0	0	15.776	5.3479	0	1.4435	0	5.1483	6.6148
0	0	0.31014	0	0	0	0	1.6793	0	18.733	3.4438	0	0	30.107	0	1.4217	0	0	0.9647	0	0	0	0	0	12.288	3.402	0	9.0857	0	0	4.7148	0	0	2.8288	0	0	0	16.731	7.7653	0	0	0	1.4673	7.5504
0	0	0	0	0	0	0	2.0955	0	17.663	5.6891	0	0	27.324	0	0	0	0	0.55507	4.0942	0	0	0	0	11.49	0	0	10.331	0	0	6.1465	0.31802	0	4.2015	0	0	0	16.374	5.0011	0	0.61293	0	3.5686	8.818
0	0	0	0	0.78396	0	1.173	1.9021	0	23.688	4.4464	0	0	26.233	0	0	0	0	2.1257	3.2378	0	0	1.9774	0	9.7303	0	0	11.426	0	1.636	8.8908	0	0	0.42696	0.61048	0	0	15.006	4.142	0	1.7231	0	0	5.9507
0	0	0	0	0.0035632	0	0	2.1088	0	25.279	1.0227	0	0	27.753	0	0.12454	0.98229	0	2.5036	1.6173	0	0	0.63451	0	8.2402	0	0	7.9277	0	0	5.8199	0	0.81707	0	0	0	0	13.942	0	0	2.0188	0	1.0618	7.4238
0	0	0	0	0	0	0	3.0734	0	33.588	3.9831	0	0	35.882	0	1.0284	0	0	1.1673	0	0.76696	0	0	0	10.476	0.89777	0	10.463	0	0	2.3613	0	1.713	1.6507	0	0	0	15.54	3.851	0	1.4022	0	0.256	4.003
0	0	0	0	0.74125	0	0	1.5407	0	33.956	3.1953	0.38846	0	37.925	0	0	1.0821	0	0.55181	3.115	0.38826	0	0	0	8.5909	0	0	8.6961	0	0	5.3608	0	0.98849	0.25034	2.2404	0	0	14.173	2.6283	0	0	0	0	6.2793
0	0	0	0	0.67645	0	2.0119	3.2386	0	33.947	4.1399	0	0	37.839	0	2.1576	0	0	2.3349	0	0	0	0	0	6.4625	0	0.17343	8.0969	0	0	0.97458	0	1.5407	0.093932	1.7046	0	0	11.8	0	0	0	0	0	5.8113
0	0	0	0	0	0	0.16934	3.244	0.62803	31.085	2.5847	0	0	35.264	0	2.7042	0	0	0.13703	1.633	0	0	0	0	14.22	0	0	7.581	0	0	2.5467	0	0.51245	1.0149	0.95454	0	0	12.13	1.4247	0	0	0	4.0789	5.1379
0	0	0	0	0	0	0	2.0123	0	27.353	3.8118	0	0	33.674	0	1.1474	0.38282	0	0.94732	3.4441	0	0	0	0	16.34	0	0	7.5448	0	0	7.5115	0	0	2.7561	0	0	0	13.631	4.0668	0	0	0	2.8121	5.9768
0	0	0	0	0	2.1322	0.10134	2.9025	0	24.955	4.383	0	0	32.762	0	1.5156	0	0	1.0432	0.73997	0.60162	0	0.23843	0	18.922	0	0	9.1235	0	0	4.1458	0	0	0	0.84285	0	0	15.252	2.7748	0	1.0629	0	0	7.0018
0	0	0.11058	0	0	0.43831	0	0.66145	0	21.514	1.4356	0	0	35.285	0	4.773	0	0	1.936	1.1632	0	0	2.8207	0	16.232	0	0.12916	8.214	0	0	4.5941	1.2138	0.071662	0.59808	0	0	0	12.798	2.9071	0	1.4667	0	2.4691	9.992
0	0	0	0	0	0	0	3.9416	0	22.678	3.6804	0	0	33.594	0	0	0.98339	0	0.97046	3.801	0	0	3.7225	0	13.801	0	0.99268	10.212	0	0	4.7293	1.023	0	0.62791	0.61088	0	0	14.638	3.5311	0	0.71855	0	2.127	8.3749
0	0	0	0	0	0	0	0	0	20.889	3.943	0	0	32.799	0	0.78364	0.28032	1.1351	1.8574	5.6971	0	0	3.1148	0	20.132	1.3475	0.087251	7.2826	0	0	9.2125	0	0	0.61476	0	0	0	15.274	4.0009	0	1.5039	0	2.2193	9.0165
0	0	0.046998	0	0	0	0	2.4732	0	25.224	1.4949	0	0	31.674	0	2.1098	0	0	0	2.9046	0	0	5.3695	0	25.198	0	1.291	10.071	0	0	4.6929	0.050303	0.32319	1.3534	0	0	0	14.148	4.2807	0	0	0	5.6805	7.8444
0	0	0	0	0	0.25016	0.19698	2.5118	0	26.004	3.5624	0	0	28.79	0	1.6223	1.3276	0	0.99455	4.2395	0	0	5.2707	0	26.448	0	0.89649	7.3541	0.97633	0	7.51	0	0	1.6756	0	0	0	14.871	6.1245	0	3.4804	0	7.8633	8.5919
0	0	0	0	0.35401	0	0	3.5229	0	27.308	4.6311	0	0	26.888	0	0.09885	0	0	0	4.5958	0	0	0.38027	0	30.47	0	0.6815	12.106	0	0	8.2859	0	0	3.7367	0	0	0	14.094	4.2132	0	5.3894	0	4.2744	7.9915
0	0	1.1908	0	0	0	2.0393	2.8991	0	28.35	3.9831	0	0	23.513	0	0.50651	0	0	0	4.1531	0.7019	0	5.9621	0	31.489	0	0.32604	8.3496	0	4.1112	7.3828	0	0	6.1606	0	0	0	15.062	6.8885	0	4.4656	0	3.901	7.3035
0	0	0.40993	0	0	0	0	2.3299	0	26.15	2.4839	0	0	21.663	0	2.1265	0	0	2.454	2.1905	0	0	2.0081	0	30.137	2.2768	0.46189	9.6282	0	1.1801	6.5834	2.129	0	3.6784	0	0	0	16.574	9.9855	0	2.7576	0	5.58	3.6062
0.22756	0	0.41844	0	0.62595	0	0.15223	4.5476	0	22.231	3.8169	0	0	21.693	0	1.5366	0.10171	1.2906	0.009473	2.9134	0	0	5.0947	0	30.196	3.535	0.41164	10.02	0	0	6.2844	3.7465	0	3.9202	0	0	0	16.814	6.8214	0	3.9284	0	7.4889	6.8538
0	0	0.56975	0	0	0	0	1.4009	0	19.407	3.0406	0	0	21.055	0	3.3666	0	0	0.39248	2.3594	0	0	1.4609	0	26.171	0.59067	0.31587	7.9713	0	0.81628	6.7246	4.0601	0	5.1485	0	0	0	17.566	6.0201	0	0.60286	0	2.1651	6.5011
0	0	0.33481	0	0	1.3429	0	1.3941	0	18.506	1.3932	0	0	18.831	0	3.5912	0	0	0	0	0	0	4.1333	0	25.773	0	0	10.126	0	0	7.7565	0	0	2.0993	0	0	0	14.803	5.7586	0	0.31432	0	0	4.9988
0	0	0	0	0.16369	0	0	2.1581	0	17.616	1.7497	0	0	17.114	0	1.9373	0	0	1.4546	1.9655	0	0	2.8628	0	23.525	4.4229	0	8.6364	0	0	6.0637	3.7868	0	4.7902	0	0	0.99904	16.333	3.8234	0	3.0332	0	3.4691	7.054
0	0	0.12907	0	1.1199	0	0	2.2956	1.208	14.282	2.0046	0	0	16.868	0	2.8746	0	0	3.6883	2.5477	0	0	0	0	23.77	0.90168	0	7.5962	0	0	5.479	0.27368	0	2.181	0	0	0	16.95	2.1542	0	2.11	0	3.7905	5.4982
0	0	0	0	0.19347	0	1.9841	3.5552	0	18.61	1.9087	0	0	14.642	0	3.8626	0.097289	0	0.96502	1.0882	0	0	3.2879	0	23.142	0	0	6.7287	2.5494	0	5.4817	0.48257	0.051516	1.705	0	0	0	16.411	4.0823	0	1.5142	0	0.77891	3.5423
0	0	0	0	0	1.6838	0	4.0105	0	20.754	1.8168	0	0	13.449	0	3.3368	0	0	0.47369	2.0115	0	0	4.7954	0	27.225	0	0	7.8823	0	0	6.6048	0	0	2.0951	0	0	0	15.929	0	0	0.77583	0	0	3.695
0.0069281	0	0	0	0	0	0	2.0643	0	17.5	3.3326	0	0	11.978	0	1.2787	0	0	0	3.4036	1.647	0	1.8621	0	27.709	0	0	7.1464	1.5449	0	1.2097	0	0	2.9948	2.9413	0	0	14.933	1.5068	0	0	0	0.87352	8.2804
0	0	0	0	0	0	0	4.2748	0	17.341	1.6158	0	0	11.983	0	5.7874	0	0	0.48901	0	0.53493	0	0	0	24.737	0	0.043226	7.0918	0	0	0.4996	0	0.24981	5.7406	2.0767	0	0	12.488	3.4812	0	1.4634	0	0	8.2828
0	0	0	0	0	0.0582	0.8576	3.7082	0	13.733	2.3264	0	0	10.925	0	0	0	0	0	0	0	0	0.18589	0	26.219	0.047532	0.063106	6.5996	0.86272	2.777	0.13858	0	3.7043	5.6664	4.081	0	0	12.714	3.7008	0	0.8783	0	3.867	7.8324
0	0	0	0	0	2.2335	0	2.9964	1.3873	12.483	1.9198	0	0	9.8898	0	0	0	1.4649	2.6231	2.2658	0.94273	0	0.38067	0	25.506	0	0	4.9431	0	0	5.5129	0	2.1211	5.0182	2.5306	0	0	11.748	3.2871	0	1.3537	0	0	9.6385
0.12801	0	0	0	0	0	0	1.4686	0.73255	13.964	1.3819	0	0	8.4673	0	1.2681	0	3.918	0	1.6265	0.13357	0	7.0785	0	24.166	0	0	8.4678	0	0	3.1465	0	0.97558	0	0.68985	0	0	11.466	0.91626	0	0	0	0.015329	7.6166
0	0	0	0	0	0	0	2.6559	0	10.848	2.1869	0	0	7.6086	0	0	0	0	1.349	3.0603	0.19238	0	2.4059	0	25.975	1.8721	0	7.8902	0	0	1.4395	0	3.5756	3.0835	1.4409	0	0	13.688	0	0	0.038097	0	0	7.4028
0.38036	0	0	0	0	0	0	1.5377	0	9.9307	1.339	0	0	6.9707	0	0	0	0	0	1.9487	0	0	4.2109	0	23.66	0	0	9.5392	0	0	2.294	0	4.9718	0.53507	0	0	0	12.753	1.1695	0	0.61415	0.040434	0	9.5446
0	0	0	0	0	0	0	0.19081	0	8.4903	2.128	0	0	6.4862	0	0	0.67677	0	0.69847	1.2291	0.38316	0	5.0069	0	23.896	0	0	9.3837	0	0.40276	3.2762	1.3321	3.8364	1.4659	0.51415	0	0	11.311	1.9999	0	2.4546	1.3118	1.9439	11.461
0	0	0	0	0	1.317	1.0783	1.9972	0	8.1598	3.3958	0	0	4.6655	0	0.74273	0.94525	0	0.69086	0.38721	0	0	4.4042	0	19.902	1.814	0	8.0476	0	0	3.9013	0	2.6465	0.63696	1.1007	0	0	11.226	0.90244	0	2.8413	0	0	9.7978
0	0	0	0	0	0	0	0.93901	0	7.9992	1.192	0	0	5.226	0	0	1.3152	0	0	1.3777	0	0	2.7851	0	23.276	0	0	8.1116	1.8772	1.5779	2.9138	0	3.9823	0.1582	1.9341	0	0	10.504	0.21623	0	1.8529	0.82533	0.043206	10.897
0	0	0	0	0	0	0	0.43164	0	5.24	0.15401	0	0	3.8653	0	1.9331	0	0	0	0.97859	0	0	1.1954	0	35.605	0	0.028542	5.5768	0	0	1.9302	0.082787	3.4187	0.0051685	0.47088	0	0	8.4349	0	0	0.17234	0	0	10.8
0.054089	0	0	0	0	0	0	1.4915	0	5.0607	0	0	0	3.8884	0	0	0	0	0	0	0	0	3.2361	0	40.98	0	0	3.753	0	0	0.3672	0	6.5588	0	0	0	0	9.1076	0.71385	0	4.0908	0	0	11.664
0	0	0	0	0	0	0	0	0	3.8976	1.4022	0	0	4.0369	0	3.1807	0	1.4073	0	1.6987	0	0	4.4282	0	39.181	0	0	6.6771	0	0	0.94361	0	5.5773	3.4733	0	0	0	12.254	0	0	0.77056	0	0	13.284
0	0	0.12651	0	0	0	0	0.74849	0	8.5497	1.6764	0	0	4.0754	0	0	0	0	0	3.1023	0	0	1.6127	0	40.256	0	0	6.706	0	0	4.8843	0	3.8692	0	0	0	0	11.438	2.8668	0	2.3815	0	0.4103	13.736
0	0	0	0	0	2.8709	0	0	0	10.188	2.5051	0	0	1.3914	0	0.91847	0	0	0	4.2512	0	0	2.6051	0	39.297	2.6403	0	9.2368	0	0	0	0	4.7096	2.4392	0	0	0	12.224	3.6315	0	2.2996	0.97926	0	13.05
0	0	0	0	0	0	0	0.72669	0	10.808	2.8241	0	0	1.3389	0	2.8618	0	0.5638	0	2.5784	0	0	4.3814	0	39.997	0	0	6.9245	0	0	3.8149	0	2.3871	5.8557	0	0	0	12.014	6.4323	0	2.201	0	0	10.215
0	0	0.11144	0	0	0	0	0.91111	0	12.893	1.5548	0	0	1.9451	0.71248	0	0.027609	0	0	1.8827	0	0	8.5802	0	39.337	0	0	8.7123	0	0	2.9675	0.30779	4.5206	3.8353	0	0	0	8.0586	0	0	4.8546	0	0.076394	11.055
0	0	0.5272	0	0	0	0	3.0906	0	14.261	1.4068	0	0	2.5061	0	1.0886	0	0	1.2494	1.4931	0	0	5.2338	0	40.418	0	0	7.8086	0	0	6.3498	0	0	3.3939	0	0	0	9.0598	2.0745	0	4.709	0	0.56528	10.493
0	0	0	0	0	0	0	1.1587	0	14.752	1.918	0	0	1.568	0	3.4017	0	0.43072	0	2.3313	0	0	9.4858	0	38.011	0	0	9.5156	0	0	5.4554	0.92583	1.5552	1.108	0	0	0.25944	9.7381	5.6595	0	2.7784	0	2.1152	6.3291
0	0	0.30709	0	0	0	0.23427	0	0	15.938	0.78974	0	0	0.38506	0	0	0	4.2413	0	3.3365	0	0	7.7439	0	34.566	0	0	7.2251	0	0	5.1759	0	1.8455	0.35505	0	0	0	6.0005	2.9855	0	2.6174	0	0	9.0973
0	0	0.73311	0	0	0	0.23558	1.2015	0	14.912	1.9666	0	0	0.83245	0	1.1955	0	0	0	3.6687	0	0	6.9377	0	34.238	0	0	8.1928	0.27204	0	3.3223	0	3.2172	2.0299	0	0	0	7.3264	0	0	3.2371	0	1.3337	8.9959
0	0	0.85594	0	0	0	0	0.033749	0	14.314	3.5286	0	0	1.7761	0	0	0	0.47061	0	0	0	0	10.192	0	32.214	0	0	7.0686	0	0	2.8388	0	11.575	4.878	0	0	0	8.5459	3.0027	0	5.9209	0	2.8817	11.583
0	0	0	0	0.034868	0	0	1.1277	0	12.75	3.3012	0	0	1.344	0	2.6781	0	0.14016	0	2.7334	0	0	8.6665	0	31.005	3.6966	0	9.3094	0	0	1.0444	0	16.143	3.7982	0	0	0	10.616	6.3752	0	5.8765	0	6.38	8.8386
0	0	0	0	0	0	0	0	0	13.734	4.6929	0.069051	0	1.1975	0	0.94672	0	0	0	4.4231	0	0	10.641	0	29.926	2.4797	0.26039	8.315	0	0	6.6134	0	17.529	4.5401	0	0	0	9.3277	1.7574	0	8.0787	0	0.44217	10.944
0	0	0.023867	0	0	0	1.0947	1.0402	0	22.88	2.257	0.52127	0	1.3391	0	2.2846	0	2.2258	0	4.351	0	0.014498	9.7977	0	29.757	5.1638	1.1719	7.243	0	0	7.1726	2.4335	17.097	3.8703	0	0	0	10.291	5.4629	0	5.1631	0	3.9814	9.4404
0	0	0	0	0.52912	0	1.3937	2.1389	0	31.78	3.9003	0.65235	0	1.905	0	2.2526	0	0.9912	0	3.8332	0	0	7.868	0	26.905	2.0278	1.0499	9.3749	0	0	4.7747	0.15858	13.23	2.4459	0	0	0.39692	10.198	10.734	0	2.735	0	4.4361	9.5819
0	0	0	0	3.0141	0	0.77932	3.806	0	41.708	4.6283	0.58636	0	5.6487	0	0.64913	0.51698	0	0	4.7111	0	0	13.006	0	27.896	0.19093	1.9772	6.0774	0.54101	7.1486	8.3501	0	13.936	4.8423	0	0	1.0329	12.427	13.701	0	2.539	0	4.196	9.5054
0	0	0	0	1.8588	1.8461	5.4524	5.009	0	48.814	4.7465	1.9525	0	4.6064	0	0.70257	0.050318	0	2.0419	8.096	0	0	18.445	0	30.557	0	3.1896	8.6516	0	5.4193	3.1607	2.74	15.236	2.0052	0	0	0	14.401	6.6271	0	1.3063	0	4.8655	10.485
0	0	0.13807	0	1.3812	0.33218	4.3358	6.0046	0	53.885	4.0955	1.9052	0	4.4958	0	1.1866	0.42307	0	1.9557	6.7388	0	0	16.173	0	27.339	0	3.0905	9.3354	0	1.0262	3.3673	2.9454	13.029	1.7349	0	0	0.75301	15.034	7.943	0	3.328	0	3.8031	5.7404
0	0	1.5774	0	1.1062	1.5478	5.2542	5.1446	0	64.952	2.8003	1.1042	0	5.0839	0	3.2256	0	0	2.563	5.7464	0	0	11.589	0	22.974	0	1.9609	6.8685	0	0	7.3873	0	11.434	5.8807	0	0	0	11.487	18.812	0	2.378	0	8.5429	8.486
0	0	0.52439	0	2.7125	0.51586	5.336	6.3576	0	70.237	1.9551	2.6437	0	4.8137	0	3.2132	1.4806	0	1.6418	2.4853	0	0	13.594	0	21.12	0	2.2944	7.1895	0	0	8.4367	0.42459	8.9174	2.3893	0	0	0.92126	13.067	12.32	0	0.5468	0	5.2023	8.2998
0.26868	0	0.43512	0	2.7675	0	3.5085	5.4362	0	77.019	3.4464	3.9073	0	4.9483	0	6.3426	0	0	1.1894	9.1221	0	0	11.176	0	22.921	0	2.789	4.7542	0.86579	1.5163	2.513	0	11.81	4.1021	0	0	0.93081	13.644	11.383	0	0.90821	0	6.485	4.3275
0	0	0	0	1.5796	0	2.0762	6.5013	0	78.526	5.1739	2.6096	0	2.4469	0	3.1116	0.48169	0	1.094	7.9962	0	0	12.66	0	22.258	0	3.0437	7.4494	0	4.7715	2.8197	0	13.984	3.9397	0	0	2.2746	12.961	8.701	0	2.2836	0	5.4023	5.5606
0	0	0.55293	0	2.7276	0	4.1314	7.3087	0	75.256	2.4018	2.2763	0	5.9582	0	2.1902	0.62096	0	0	6.2535	0	0	11.91	0	22.103	0	2.7892	9.9076	0	4.3454	7.0618	4.5013	10.327	3.1746	0	0	0.56406	14.216	7.0879	0	0.30407	0	5.7179	3.1705
0	0	1.4608	0	2.5375	0	3.1946	5.2786	0	70.9	3.5258	0.52342	0	7.1467	0	2.0363	2.3367	0	0	5.6263	2.2524	0	9.1305	0	21.611	0	3.6723	10.657	0	4.894	6.2384	0.0027113	12.411	0.8764	0.4234	0	0	16.233	13.246	0	1.7689	0	10.006	5.1992
0	0	0.33916	0	2.4444	0	0.30402	5.098	0	66.407	2.9658	0	0	14.53	0	1.1748	0.8906	0	0.14197	8.2969	2.8194	0	10.417	0	21.449	0	3.5347	10.728	0	4.6357	7.6695	0.096343	5.0811	1.2989	0	0	0.48922	15.847	1.6782	0	3.514	0	10.685	5.3381
0	0	2.326	0	3.6121	0	1.6684	3.6377	0	62.209	2.1339	0	0	13.703	0	3.6786	0	0	1.1472	9.5581	2.3483	0	7.098	0	20.121	7.0059	2.9772	9.1876	0	1.4335	2.3566	0.62069	5.6451	2.179	0	0	0	14.857	0	0	5.4919	0	6.9229	7.8846
0	0	0.40104	0	0.85532	0	0	4.3702	0	58.21	1.0263	0.017181	0	14.687	0	0	1.3231	0	0.11155	7.2848	2.6789	0	8.8951	0	19.35	1.2851	3.7431	9.6939	0	0.89543	8.4488	0.32825	5.5479	1.4173	0	0	0	14.494	0	0	3.1998	0	7.8294	8.6484
0	0	0	0	0.90576	0	0	1.9025	0	52.447	3.3277	0.2732	0	11.32	0	0.59628	0.44252	0	0	5.8005	1.7749	0	6.8348	0	23.598	6.4742	2.7086	9.165	0	0	7.1015	0	3.4404	2.6462	0	0	0	14.064	0	0	3.0325	0	4.377	7.8419
0	0	0.42679	0	0.77768	0	1.7235	2.583	0	49.335	0	0	0	9.8892	0	2.4145	0.44456	0	0	6.1158	1.5256	0	5.245	0	22.789	6.2199	2.4512	9.4388	0	0	2.2544	1.7703	4.9759	0	0	0	0	13.484	0	0	0.056002	0	2.5973	8.6466
0	0	0	0	0.3344	0	0	1.6036	0	45.199	2.0831	0	0	10.48	0	2.4798	1.6172	0	0	5.4449	2.4419	0	10.297	0	19.741	8.6134	2.3956	8.2872	0	0	4.8072	0.46722	11.772	0	0	0	0	13.68	0	0	0.53042	0	5.3624	11.937
0	0	0.93464	0	1.011	0	2.7489	2.0867	0	48.042	0.36047	0	0	9.9628	0	0	0.84611	0.23288	0	2.6118	2.3034	0	2.8262	0	15.729	1.482	2.4094	7.3088	0	0	5.1744	0	13.657	0.99923	0	0	0	12.951	4.6409	0	1.1744	0	0.37944	13.931
0	0	0	0	0.73316	0	0	0.23589	0	47.194	0.39028	0	0	18.027	0	0	1.3085	0	0	0.88097	1.0982	0	10.105	0.23363	14.778	0	1.9723	7.8542	0	0	2.3561	0	19.067	0	0	0	0	8.9119	2.4188	0	0	0	2.9859	17.998
0	0	0.13726	0	0.13396	0	0.082915	0	0	44.242	0	0	0	38.37	0	0	0	0	0	7.98	1.6833	0	9.7527	0	11.595	0	2.6589	10.586	0	0	7.4178	0	17.777	0	2.171	0	0	9.8255	0	0	1.1668	0	5.8504	16.191
0	0	0	0	0	1.1384	0	0.52162	0	41.273	1.504	0	0	48.965	0	0.46609	0.8276	0	0	2.5263	2.8541	0	5.8293	0	14.212	0	1.2705	9.8715	3.0176	1.6042	9.2725	0	18.701	0	2.9722	0	0	9.2449	0	0	0.47348	0	1.8108	9.6643
0	0	0.14479	0	0.97981	0	0	1.5054	0	37.471	1.3803	0	0	49.88	0	0	0	0	0.01578	5.4642	3.7716	0	3.5623	0	15.359	0	1.3418	10.707	0	3.5296	1.2641	0	16.582	0	2.0012	0	0	9.9153	0.94292	0	1.576	0	6.3744	15.966
0	0	0.36185	0	1.505	0	0	2.4359	0	34.404	0	0	0	49.568	0	0	0	0	0	3.4302	3.8309	0	0.75414	0	13.91	4.0696	0.2523	12.424	0	4.7988	7.5299	0	17.316	0	2.3293	0	0	13.686	0	0	0	0	4.4892	13.797
0	0	0	0	0.61601	0	0	0.45287	0	31.792	1.7281	0	0	48.158	0	0	0.71259	0	0	5.2359	5.3784	0	0	0	16.232	0.35997	2.2584	12.43	0	13.035	8.7727	0	20.323	0	2.1118	0	0	13.619	0	0	1.4435	0	4.2669	11.951
0	0	0	0	0	0	1.4781	1.2927	0	35.861	1.6249	0	0	44.911	0	0	0	0	0	5.4596	4.4075	0	1.2855	0	13.548	1.1591	1.8604	10.856	0	17.112	3.6448	0	26.085	0	2.2974	0	0	21.425	0	0	0	0	2.5736	10.764
0	0	0	0	0.035123	0	0	1.8653	0	37.57	0	0	0	41.84	0	0	0	0	2.7042	4.4762	5.7291	0	3.8488	0	12.486	0	0.82012	7.0887	0	29.491	5.1014	0	29.258	0	3.0508	0	0	23.034	0.26757	0	0.82976	0	3.1144	13.874
0	0	0.13079	0	0	0	0	0	0	35.893	3.9886	0	0	40.265	0	0	0	0	1.3067	3.2755	4.4938	0	2.6349	0	11.96	0	1.1724	7.8111	0	34.422	3.0962	0	27.111	0	2.9352	0	0	23.474	0	0	0.52258	0	4.3463	11.252
0	0	0	0	0	0	0	0	0	33.073	4.0693	0	0	38.343	0	0	1.2861	0	0	3.2813	4.7353	0	4.7868	0	9.4708	0	1.7071	6.8889	0	43.574	9.016	0	30.235	0	6.0263	0	0	21.922	0	0	0.24136	0	7.1154	11.397
0	0	0	0	0	0	0	0	0	29.901	2.7597	0	0	34.929	0	0	0	0	0	4.462	7.758	0	0	0	9.3087	0	2.8102	8.6118	0	61.423	10.421	0	38.85	0	8.43	0	0	25.437	0	0	2.5377	0	3.7866	15.474
0	0	0	0	0.13153	0	0	0	0	26.52	3.8313	0	0	34.081	0	0	0	0	0	4.8561	11.269	0	0	0	15.937	0	6.5365	10.371	0	71.076	11.211	0.295	47.644	0	9.3317	0	0	28.692	0	0	0.038334	1.1811	4.8302	20.18
0	0	0	0.12187	0	0	0	0	0	23.578	3.3769	0	0	31.202	0	0	0	0	0	6.0269	11.16	0	0	0	26.744	0	5.9967	10.925	6.302	72.747	9.8197	0	46.108	0	11.046	0.26864	0	31.844	0	0	0	0	4.013	18.051
0	0	0	0	0	0	0	0	0	21.698	2.6302	0	0	31.09	0	0	0.28626	0	0	4.435	10.697	0	1.5497	0	33.216	4.7164	5.4538	8.2792	0	68.471	7.8643	0	46.255	0	8.7351	0	0	34.729	1.4245	0	1.7031	1.4527	3.3226	17.61
0	0	0	0	0	0	0	0	0	22.621	2.1667	0	0	35.823	0	0	0	0	1.3111	4.7475	11.504	0	0	0	35.08	0	5.593	8.7247	0	67.974	5.9188	0	46.804	0	8.4543	0	0	34.01	0	0	5.0819	0.18554	1.349	19.125
0	0	0.012097	0	0	0	0	0	0	25.138	3.0545	0	0	45.674	0	0	0.20165	0	0	6.1777	11.523	0	0	0	32.8	0	4.4757	10.443	0	62.107	9.2245	0	42.227	0	8.3492	0	0	32.692	0	0	2.3037	0	2.827	17.043
0	0	0	0	0	0	0	0	0	22.537	2.5131	0	0	55.884	0	0	0	0	1.0298	6.0321	10.446	0	0	0	30.645	0	4.0018	10.205	0	67.073	7.5506	1.0385	36.165	0	7.3722	0	0	34.704	2.9792	0	3.1911	0	2.8654	13.669
0	0	0	0	0	0	0	0	0	20.659	3.4987	0	0	62.599	0	0	1.5868	0	0.53865	6.5377	9.4327	0	0	0	29.978	4.3349	3.5834	10.512	0	66.065	9.2203	0	33.602	0	6.3735	0	0	31.872	0.1402	0	1.8769	0	3.7861	13.29
0	0	0	0	0	0	0	0.56117	0	22.243	4.7112	0	0	65.038	0	0	0	0	1.8336	7.4607	9.2077	0	0.062233	0	29.685	2.4903	3.1295	12.589	0	71.707	7.6636	0	32.054	0	5.5033	0	0	31.223	0	0	5.8861	0	1.7046	14.424
0	0	0.54013	0	0.12178	0	0	3.193	0	19.627	4.9441	0	0	68.209	0	0	0	0	1.185	7.353	9.9345	0	0.60158	0	30.947	0	3.0571	12.227	0	67.651	7.8755	2.0732	26.391	0	6.1012	0	0	33.458	0	0	2.8098	0	5.4303	12.816
0	0	1.1013	0	0	0	0	6.9157	0	26.608	5.7106	0	0	64.524	0	0	2.0527	0	0	8.2085	9.6006	0	0	0	30.046	5.5452	2.7513	11.848	0	68.918	9.7418	2.4687	28.693	0	3.9193	0	0	30.694	0	0	4.3832	0	2.2158	11.042
0	0	1.2509	0	0.23079	0	0	4.5689	0	38.97	4.0836	0	0	64.632	0	0	2.0686	0	0	10.083	8.2596	0	0.24813	0	28.593	0	2.8814	12.237	0	66.37	9.5756	2.2139	28.269	0	4.7102	0	0	32.473	1.8039	0	3.8926	0	4.2956	9.0132
0	0	0.30417	0	1.577	0	0	4.8967	0	42.113	4.3824	0.21994	0	65.113	0	0	1.5871	0	0	8.7591	8.1293	0	0	0	26.381	0	3.4753	13.236	0	71.25	10.6	3.8812	26.405	0.14427	2.3656	0	0	34.556	2.347	0	4.7323	0	3.131	10.418
0	0	1.1811	0	1.9233	0	0	2.226	0	42.642	4.1048	0	0	69.732	0	0	0.10589	0	1.4951	9.526	8.5523	0	0	0	27.354	7.1471	3.8861	12.148	0	81.725	10.687	2.426	29.613	2.3678	2.8161	0	0	36.382	0.6793	0	3.5343	0	0.36477	10.124
0	0	1.8474	0	0.68892	0	0	3.9202	0	40.891	4.7459	0	0	78.459	0	0	0	0	1.3963	11.553	8.8018	0	0	0	27.388	0	2.8713	12.927	0	86.444	9.5997	5.604	34.627	0	2.8555	0	0.22691	38.262	0	0	3.6653	0	0.76874	10.166
0	0	0.97568	0	0	0	0	1.3631	0	40.432	6.1088	1.3506	0	78.08	0	0	0	0	0.91575	12.781	13.311	0.27686	0	0	27.992	0	5.1203	14.899	0	94.75	9.0116	4.0537	47.53	0	7.3116	0	0	38.476	0.54107	0	4.5845	0	0	13.027
0	0	0.69745	0	2.1943	0	0.16759	1.3057	0	40.557	8.5706	1.0474	0	82.493	0	0	0	0	3.9723	11.716	16.861	0	0.95808	0	48.383	1.3752	7.8993	10.842	0	93.917	14.686	6.3498	56.003	0	8.9638	8.3277	1.8807	42.479	5.7973	0	7.9153	6.8713	1.2941	16.42
0	0	0.856	0.13659	5.0349	0	0.056593	2.5011	0	47.73	8.9242	0	0	85.593	0	0	0	1.6975	4.7611	11.88	20.677	0	2.4996	0	64.611	0	9.3697	11.239	0	97.147	5.59	6.0538	56.452	0.47922	11.328	16.358	4.3019	46.402	15.038	0	7.6714	11.956	5.1789	18.878
0	0	0.069311	1.5212	5.822	0	0.5772	0	0	50.946	12.344	1.6997	0	89.026	0	0	0	0	6.782	10.988	25.021	0	0.84582	0	72.321	0	13.648	11.929	0	94.607	11.777	6.5347	61.097	1.6757	15.359	20.68	6.0242	48.223	10.568	0	7.2113	17.304	5.6379	20.642
0	0	0.90611	1.0197	4.4045	0	1.7269	0	0	51.507	12.729	3.7933	0	91.732	0	0	0	0	7.955	10.283	24.783	0	0.40088	0	75.486	0	16.438	10.385	0	90.186	11.574	9.1015	61.227	6.5322	16.952	27.367	10.676	45.762	15.725	0	5.9047	22.994	7.8634	18.429
0	0	1.2725	1.4444	5.0007	0	0	0	0	52.312	12.476	3.8933	0	90.994	0	0.12918	0	0	14.344	13.08	28.742	0	0	0	76.148	1.1147	19.906	11.307	0	92.352	7.3267	8.1407	63.591	6.7687	19.77	25.131	13.208	50.24	13.58	0	8.1329	25.573	9.6714	22.361
0	0	0	0.6591	8.336	1.2873	3.4581	1.5161	0	61.361	13.285	3.7226	0	92.515	0	0	0	0	13.21	11.967	34.6	0	0.76577	0	75.8	0	23.131	12.143	0	88.794	13.614	12.696	60.415	5.9987	26.261	31.515	11.22	48.197	17.608	0	8.9739	20.852	10.741	20.651
0	0	0	0.73386	15.088	0	2.7735	0.74069	0	62.447	13.589	3.5357	0	92.011	0	0.83354	0	0	15.406	9.7126	43.209	0	0	0	73.676	4.9329	27.693	11.905	2.5017	92.075	13.514	8.8557	62.048	10.944	36.507	35.104	13.662	47.549	22.431	0	7.8829	29.395	16.129	22.146
0	0	0	1.0229	18.124	0	4.9654	0	0	66.51	15.79	4.9923	0.42752	89.537	0	0.80508	0	0	16.331	9.3014	45.542	0	0	1.1088	65.224	14.909	30.775	10.656	4.7925	92.142	10.534	8.5945	65.233	9.2528	40.595	36.484	10.583	48.272	19.853	0	7.741	25.752	20.177	20.984
0	0	0	1.3715	17.748	0	3.8068	0	0	71.331	15.777	4.7745	0.24476	88.326	0	1.5946	0	0	16.839	10.857	47.745	0	0	0.6255	62.073	6.8846	33.614	9.2354	5.3489	88.881	10.479	13.065	73.797	9.5245	41.309	41.452	10.216	50.412	20.297	0	4.8859	29.932	21.03	26.775
0	0	0	1.2136	17.239	0	3.4309	0	0	73.136	16.099	2.3651	0.38369	84.183	0	0.94877	0	2.5925	13.266	10.32	51.035	0	1.4031	0	62.123	3.3576	33.192	7.6868	4.4784	97.468	6.9665	13.541	76.261	10.956	41.395	46.98	11.435	49.619	22.719	0	6.5156	29.691	23.118	29.911
0	0	0	2.1415	16.497	0	3.8895	0	0	72.684	17.687	2.8931	0.15015	84.086	0	0	0	0	15.489	12.516	50.507	0	1.0826	0.9309	59.689	5.0935	30.732	6.5593	5.8747	90.558	7.7382	7.9951	76.181	10.385	41.824	43.061	7.006	52.826	21.477	0	5.2844	29.565	22.357	27.01
0	0	0	1.9425	17.527	0	0.96683	0	0	69.946	13.877	1.7104	0	80.891	0	0	0	0	14.407	8.3086	47.367	0	3.6117	0	56.189	5.0825	30.357	9.5294	5.4343	92.854	9.2333	6.6585	74.479	7.3994	41.971	39.978	5.1447	50.788	17.462	0	7.6082	26.679	18.133	26.196
0	0	0	1.7536	19.288	0	0	0	0	65.076	15.018	2.0869	0	77.657	0	0	0	0	14.096	9.8512	49.169	0	3.5233	1.0852	52.857	6.912	28.257	10.039	6.973	95.924	5.4175	7.8703	69.901	3.11	43.21	42.651	8.1379	54.332	15.938	0	7.1837	30.135	17.913	24.892
0	0	0	3.4621	18.121	0	2.1324	0	0	62.717	14.569	0.63617	0	74.656	0	0	0	0	12.973	13.897	50.667	0	3.5078	0.94804	52.329	9.962	29.657	8.5661	1.8964	90.142	4.7132	6.411	68.466	3.4499	43.989	40.816	9.2488	53.996	17.096	0	7.5475	31.334	16.524	27.006
0	0	0	4.7209	17.705	0	1.6117	0	0	63.795	11.099	3.3339	0	76.236	0	0	0	0	11.993	11.747	50.955	0	1.7938	2.7272	47.106	3.6998	30.529	9.5133	5.8123	91.671	5.7188	6.1663	68.388	3.3673	43.775	37.902	8.0586	55.574	15.192	0	7.2009	32.342	18.555	22.838
0	0	0	5.3364	17.899	0	2.8809	0	0	62.024	15.608	0.67287	0.49618	78.094	0	0	0	0	8.9206	12.258	49.969	0	5.081	3.6039	42.129	10.633	32.058	7.8781	3.7821	97.871	8.5734	12.117	64.666	5.9645	45.112	42.261	7.3562	59.648	22.409	0	5.6235	36.051	13.742	25.745
0	0	0	5.4214	18.041	0	1.0475	0	0	64.292	13.891	1.0443	0.91614	77.828	0	0	0	0	10.86	14.208	51.778	0	5.1535	3.2707	44.006	9.0996	30.505	6.8988	7.3899	94.327	4.4376	6.6446	61.909	1.0121	45.027	40.543	9.0085	58.369	18.993	0	8.4221	41.555	17.226	22.184
0	0	0	4.5898	16.475	0	4.6049	0	0	71.584	14.75	3.3763	0.9737	78.043	0	0	0	0	9.0756	17.759	50.505	0	4.5901	2.9803	43.586	25.934	32.382	11.081	2.965	100	13.143	6.3955	60.729	2.1959	44.757	39.003	11.249	57.849	19.924	0	4.6543	47.642	16.457	21.04
0	0	0	4.4266	14.629	0	3.5897	0	0	69.058	12.64	2.5164	0.39636	76.188	0	0	0	0	8.5549	17.087	47.578	0	2.3691	1.5952	44.004	34.73	30.416	9.2101	2.642	98.287	11.075	11.516	59.211	1.2762	40.746	32.763	8.2347	58.271	16.285	0	7.6141	46.439	11.346	19.896
0	0	0	4.1878	15.805	0	3.2422	0	0	65.833	11.388	1.333	0.41827	72.944	0	0	0	0	8.009	18.024	44.673	0	5.1052	0	42.618	40.626	29.62	9.5672	2.2899	91.829	11.954	8.2363	56.84	2.1225	35.372	28.239	7.0837	57.694	13.752	0	7.8915	38.943	16.755	17.421
0	0	0	3.8502	14.655	0	0	0	0	59.988	11.15	0	0.75427	69.348	0	0	0	0	7.2897	13.552	41.621	0	2.5569	1.316	38.761	41.098	26.357	6.8039	1.2475	86.953	14.278	4.13	47.202	0.1564	32.759	28.582	2.3636	57.546	9.6698	0	8.0545	36.316	10.318	16.013
0	0	0	3.1654	12.077	0	3.5328	0	0	55.908	10.481	0	0.65316	67.246	0	0	0	0	6.0418	10.588	38.26	0	4.641	0	36.344	40.212	23.269	10.211	2.9977	86.933	10.226	2.6497	44.242	2.5807	31.549	24.611	0	55.088	7.0629	0	6.609	32.291	8.6409	15.949
0	0	0	3.1559	13.323	0	0	0	0	52.703	9.7751	0	0.43681	65.336	0	0	0	0	4.9003	9.4468	34.121	0	5.014	0	33.493	34.893	20.334	6.3307	0.9308	82.54	9.6154	0.14153	40.526	1.1699	31.492	20.451	1.2335	53.02	6.9237	0	3.5599	27.504	10.618	10.467
0	0	0	2.0477	10.493	0	2.356	0	0	50.018	9.5277	0.38144	0.54079	62.896	0	0	0	0	5.1305	11.434	28.656	0	7.6958	0	27.994	24.486	20.051	6.4496	3.8417	76.528	12.332	1.1181	35.932	0.50232	31.918	16.554	1.1944	49.563	4.7316	0	2.077	24.537	8.3858	11.071
0	0	0	1.6154	8.2397	0	0.95685	0	0	46.809	7.6915	0	0.42481	60.173	0	0	0	0	6.5322	9.6435	27.29	0	7.46	0	28.908	17.809	17.469	5.2421	0	73.147	12.237	0.17137	32.665	0	30.298	15.648	0	48.836	0	0	3.2566	22.865	10.588	10.415
0	0	0	1.8302	8.1349	0	0	0	0	43.732	7.5692	0	0	57.673	0	0	0	0	6.758	6.5272	25.81	0	9.3918	1.8548	28.965	18.81	16.035	7.3201	0	72.763	7.9277	0	28.618	0	27.23	11.461	0	51.049	1.5996	0	3.3322	19.075	8.4839	9.5406
0	0	0	1.9322	8.9357	0	1.4541	0	0	41.992	7.7775	0	0	56.225	0	0	0	0	5.8868	10.728	22.678	0	5.5684	0	27.388	17.642	14.434	12.078	0	72.353	8.1278	0.8219	25.486	0.98278	24.326	10.845	2.2571	50.68	0	0	5.2535	14.434	7.2783	10.015
0	0	0	0.99702	8.9055	0	2.018	0	0	37.326	5.5431	0	0	51.98	0	0	0.22991	0	2.6543	8.4024	21.703	0	7.4566	0	24.638	14.581	12.844	13.172	0	61.423	7.2649	0	22.859	0.91253	24.004	7.6263	0	50.347	0	0	2.0323	11.7	7.8762	9.4626
0.21009	0	0	0.69927	6.2539	0	0.24611	0	0	32.79	6.2779	0	0	49.454	0	0	2.0344	0	6.156	6.9397	18.904	0	6.0137	0	21.908	10.812	11.038	10.836	2.0322	61.657	12.98	0	22.161	0	23.323	8.3531	0	45.51	0	0	2.4317	9.0916	7.859	8.1837
0.25483	0	0	0.59144	5.538	0	0.34658	0	0	30.831	5.3381	0	0	47.558	0	0	2.8489	0	2.6151	5.8731	14.968	0	8.7719	0	16.951	12.614	8.4051	12.286	5.5938	53.4	15.616	0	17.5	0	24.722	3.6638	0	41.736	0	0	0.91385	8.9417	6.697	8.0147
0	0	0	1.341	3.9427	0	0.1689	0	0	28.884	5.1631	0	0.19201	45.682	0	0	3.1689	0	1.6644	7.169	13.75	0	8.7303	0	17.268	8.2517	8.1084	15.424	0	47.086	10.278	0	13.234	0	20.214	1.9523	0	41.003	0	0	0	6.1933	4.1257	8.938
0	0	0	0.45322	3.7971	0	0	0	0	25.478	4.2312	0	0	42.849	0	0	1.8148	0	2.3076	5.7346	13.26	0	5.4385	0	14.839	6.9308	6.1837	12.603	2.436	49.835	10.242	0	12.61	0	19.613	2.6846	0	41.538	0	0	0.76534	7.3668	4.6391	7.5028
0	0	0	0.45862	5.5146	0	0	1.5393	0	22.14	3.9646	0	0	40.809	0	0	3.0798	0	0	5.5421	13.349	0	5.2997	0	15.022	10.134	5.071	14.802	2.729	50.1	11.472	0	13.043	0	17.472	3.3765	0	42.027	0	0	4.394	4.4745	5.2817	8.0787
0	0.020631	0	0.91857	4.3839	0	0	1.3937	0	22.292	5.3845	0	0	38.59	0	0	2.5809	0	0	4.8096	13.855	0	12.52	0	15.265	9.6532	5.6928	14.087	2.964	49.425	11.64	0	13.888	0	16.45	0.50026	0	40.935	1.0161	0	1.5193	0.54105	1.8658	6.8423
0	0	0	0.74349	3.4862	0	0.84389	0	0.16546	22.683	5.2065	0	0	37.638	0	0	2.1546	0	0	6.6841	11.83	0	12.19	0	16.872	7.5813	4.1077	16.586	0	46.085	11.239	0	11.914	1.4854	15.743	3.6841	0	42.808	0	0	4.7411	1.2847	3.2354	9.2995
0	0	0	0.2946	4.2452	0	0	0	0.84094	22.615	5.1997	0	0	36.506	0	0	3.4379	0	0.90769	8.2609	11.847	0	14.336	0	16.149	4.8179	3.3456	15.501	0	40.946	4.3485	0	9.6985	2.1731	12.091	2.4887	0	42.727	2.611	0	5.1572	1.9195	5.4826	7.6703
0	0	0	0.051356	3.8773	0.88586	1.1173	1.1912	0	21.364	3.9275	0	0	34.104	0	0	1.8582	0	1.6657	6.1952	10.702	0	19.109	0	18.167	6.8715	3.6146	15.847	0	38.623	7.5295	0	11.851	1.7114	11.783	0	0	42.988	3.5424	0	3.3271	1.9704	7.9682	9.8421
0	0	0	0	2.0214	0	0.38562	0	0	19.253	6.6755	0	0	31.716	0	0	3.4155	0	1.2779	5.1773	8.7381	0	19.579	0	18.547	2.6246	2.7091	14.928	0	38.138	3.2075	0	7.755	0.55086	13.084	0.60553	0	41.39	0	0	3.613	0	6.212	9.7909
0.079257	0	0	0	2.68	0	1.0847	1.1691	0	17.855	4.7352	0	0	33.52	0	0	3.1225	0	1.9065	9.0581	7.4255	0	19.892	0	15.699	2.4998	2.1597	15.673	0	47.986	2.0603	0	9.0517	0	10.9	1.4487	0	40.641	0	0	5.6363	0	5.0579	7.1336
0	0	0	0	2.0505	0.19945	0	1.409	0	17.353	4.9925	0	0	33.25	0	0	2.9646	0	0	7.6202	7.8818	0	22.434	0	14.002	2.2668	1.7987	16.803	0	51.16	6.53	0	6.8904	2.5263	10.916	0	0	38.907	0	0	3.0557	0	2.6537	5.8546
0	0	0	0.38157	2.3326	0.1341	0	1.2282	0	14.305	5.0795	0	0	31.166	0	0	2.6992	0	2.0544	4.6665	7.9414	0	18.472	0	12.892	0.66434	0.36523	14.677	0	50.798	1.9159	0	8.982	0	10.078	0	0	42.418	0	0	4.2512	0	5.3897	7.4565
0.32541	0	0	0.074587	2.3176	0	0	2.0775	0	13.166	4.7173	0	0	30.006	0	0	3.9985	0	2.7005	9.6808	6.5125	0	17.214	0	14.252	7.9065	1.4309	12.328	0	46.19	0	0	12.514	0	9.6442	0	0	41.762	1.0462	0.26468	9.2797	0	1.4839	10.487
0.071478	0	0	0	0.34263	1.1594	0.47234	0	0	11.906	6.0316	0	0	29.224	0	0	3.4622	0	0	4.9001	4.7996	0	21.649	0	16.699	0	0.0069541	15.221	0	43.216	3.1795	0	7.4017	0	9.4648	0.04795	0	38.375	0	0	8.4239	0	8.6105	7.2376
0.1682	0.50355	0	0	2.0911	0	0	2.2996	0	11.177	8.1987	0	0	27.968	0	0	2.3487	0	0	7.4752	4.9582	0	19.392	0	13.901	2.8336	0.10196	14.6	0	39.015	0	0	3.0085	4.373	8.8254	1.8418	0	37.182	5.2895	0	5.428	0	5.9618	6.2782
0	0.095584	0	0	0	1.2452	0	3.8331	0	11.153	8.9509	0	0	25.007	0	2.7639	1.9062	0	2.2559	5.2224	6.1826	0	24.56	0	15.205	7.7608	3.0283	12.023	1.839	40.342	4.6909	2.4204	7.2485	2.6582	10.396	3.1321	0	35.161	9.5732	0	5.8926	0	9.2592	7.2928
0	0	0.21402	0	1.2722	1.1453	2.4568	6.3284	0	11.484	9.2394	0	0	22.243	0	0	1.1677	0	1.2235	5.3645	6.6738	0	28.213	0	23.555	4.4561	2.4955	14.228	4.0318	40.195	5.2889	3.641	3.8615	6.3528	9.2466	4.0869	1.0581	34.144	14.396	0	5.4374	0	15	8.6095
0.12094	0	0	0	0.31738	1.0582	1.3592	7.6881	0	11.34	9.3687	1.1634	0	22.951	0	0.94528	1.4552	1.0219	1.2811	3.2468	5.8484	0	29.334	0	30.647	2.3355	4.5095	14.391	4.3187	37.866	2.0215	1.4175	2.7342	4.352	9.6343	4.4284	0.3364	34.512	14.974	0	7.5895	0	11.103	8.6983
1.051	0	0.84575	0	0	1.3948	2.583	9.3877	1.155	10.919	11.445	0	0	21.418	0	0	0.6556	2.0207	2.3493	8.8364	6.6693	0	31.953	0	36.659	7.4303	3.1057	13.523	4.6888	30.729	4.4001	4.0695	2.3528	5.7459	8.6102	4.732	0.24397	32.985	17.253	0	8.7304	0	11.69	10.003
0.13829	0	1.4045	0	0	2.5924	2.6519	11.315	0	12.128	12.022	0	0	20.687	0	2.3196	0	0	3.8936	7.956	6.1381	0	31.117	0	36.981	3.1379	2.6848	14.337	3.2055	24.872	1.7301	4.7416	2.0858	8.2278	7.6632	7.1508	0	34.603	19.603	0	8.7703	0	7.8101	8.8649
0.79803	0	0.032612	0.16431	0.19486	2.7259	0.96464	10.046	0.86517	12.448	12.833	0.22831	0	19.242	0.16971	1.1573	0	0	4.0643	10.742	6.4605	0	31.782	0	36.979	3.2999	3.6776	13.83	4.4489	25.426	2.5184	4.1657	0	9.6738	7.0502	7.3963	2.8219	32.618	26.275	0	10.092	0	8.8003	9.6741
0.46217	0	0.41433	0	0	0.2522	2.5038	10.364	0.03201	12.92	13.372	1.386	0	18.238	0.47495	2.6733	0.51675	2.4432	4.1206	8.6912	5.4968	0	34.307	0	38.803	7.6755	5.5448	15.448	3.6058	23.258	5.0862	6.4244	3.964	13.282	6.1362	6.3641	1.0821	32.609	25.723	0	11.885	0	8.0439	9.1149
1.3507	0	1.8417	0	0	2.0052	3.7764	12.869	3.4432	12.835	14.021	1.0451	0	16.845	1.178	3.1539	0	1.6887	3.3226	12.321	5.8285	0	37.737	0	41.739	7.1364	3.4613	13.919	3.6471	28.626	7.6718	10.393	0	14.161	5.8041	5.3972	0.14876	33.406	29.633	0	10.614	0	10.027	9.821
0.62806	0	2.3041	0	0	1.948	2.8075	13.556	0.71099	14.152	13.565	1.2264	0	14.725	0	2.2587	0	0	4.1541	9.86	5.7945	0	41.716	0	40.284	4.9216	5.7359	13.664	2.9361	26.404	0.93541	6.3517	1.2763	14.075	6.8499	7.0003	0.32053	31.111	23.938	0	13.921	0	11.493	10.236
2.0089	0	2.218	0	0	0	1.568	10.396	2.0071	13.232	14.188	0.20157	0	15.487	0	0	0.66297	1.1799	4.6546	11.187	4.983	0	40.575	0	44.432	10.906	5.5553	13.745	3.7321	24.798	0.56492	12.059	3.2266	14.72	6.7573	9.7049	5.6071	31.342	21.199	0	13.359	0.59026	12.714	12.587
1.6703	0	1.4217	0	0	1.4176	0.898	14.039	0.98133	13.395	13.875	0	0	15.344	0.50273	0.94682	0	0	5.1976	10.711	6.2128	0	37.447	0	39.265	10.546	5.7536	16.493	9.5226	23.265	4.7033	11.052	2.7525	18.184	7.1519	9.9039	3.3435	31.042	24.315	0	16.516	0	12.042	13.914
0.47332	0	2.4776	0	0	0.6325	0	11.148	1.0751	11.448	13.235	0.31555	0	13.349	0	0	0.28813	0	5.262	12.116	4.9632	0	38.998	0	38.568	12.187	5.1093	17.466	1.4321	25.618	4.1331	11.996	3.3796	16.996	7.4301	12.564	5.729	31.836	16.427	0.823	12.854	2.2786	9.1792	10.297
1.5159	0	1.8471	0	0	0.096659	0	10.797	0.88594	10.009	12.352	1.4149	0	12.648	0.28236	0	0.85367	0	2.9239	7.5286	3.9572	0	38.982	0	35.109	6.6289	3.1532	19.044	7.8224	22.647	3.7796	10.504	0.20808	13.027	7.3149	9.6427	4.0575	29.793	17.073	0.59726	14.386	2.3172	9.7	12.201
1.8768	0	2.3287	0	0	0	2.6236	10.851	1.1473	10.002	10.658	0.067889	0	12.23	0.43719	0	0.87899	1.6427	0	9.343	4.5196	0	35.185	0	32.722	11.53	2.938	18.071	7.2661	15.585	3.2061	5.9127	0	11.676	5.1689	10.85	5.9726	30.617	16.638	0	13.963	0.81497	8.5502	10.123
0.89978	0	2.652	0	0	0	1.4895	9.3665	1.0808	8.5936	10.725	0	0	11.483	0	0	0	2.2465	1.2917	8.7627	3.4045	0	32.631	0	31.259	7.3027	3.4542	17.725	0.5241	15.645	6.4892	4.5451	2.8694	16.704	5.0522	7.7919	3.3689	31.265	17.127	0	11.575	0.85773	11.792	10.225
0.32948	0	1.8109	0	0	2.8571	1.3597	7.0374	0.92674	7.1856	11.397	0.19111	0	10.302	0	0	1.4101	0.7729	2.1859	10.911	2.1117	0	38.159	0	28.631	12.367	3.9456	16.119	4.5098	16.246	1.9552	7.1277	0.16261	8.9779	2.9672	10.597	4.3341	29.682	13.217	0	12.355	0	9.3863	8.5144
1.8518	0	1.4015	0	0	0	0.75363	10.978	0	15.71	9.9169	0.84953	0	9.6346	0.33582	0	0	0.11644	1.6462	11.257	1.4959	0	36.972	0	28.252	6.7825	3.1847	15.863	3.9919	15.773	2.7214	4.9322	0.71029	10.223	4.4474	3.6316	0.75911	29.128	15.228	0	11.183	0	6.862	9.0465
0.87172	0	1.8442	0	0	0.14363	1.7523	9.4491	0	23.376	9.6259	2.9536	0	9.3322	0	0.34294	0.71094	0	2.1982	9.7311	0.88526	0	35.017	0	29.504	13.401	3.3809	16.487	2.6293	16.285	3.4076	3.7072	4.1454	10.363	4.9674	7.847	1.5116	31.257	16.35	0	6.8466	0	8.0211	7.6132
0.798	0	0.71491	0	0.47236	2.1976	2.6385	9.9744	0	25.869	8.5085	1.414	0	8.8496	0	0	0.35396	3.7396	5.0652	9.1277	0.67215	0	40.558	0	28.943	4.1834	0.83824	14.121	2.3083	13.241	0.83679	5.5391	5.0996	11.36	2.2575	0.66904	3.9306	28.007	18.064	0	9.3716	0	8.1307	9.1083
0.37835	0	1.7821	0	0.9279	1.5419	2.1472	10.093	1.5325	26.234	7.9416	2.3054	0	7.1413	0	0.23731	0.56342	0	4.7569	8.5051	1.2595	0	39.566	0	28.373	7.5111	1.6319	15.083	0	3.955	5.2049	5.8777	1.6825	11.311	1.8543	4.4597	1.9601	28.008	15.494	0	10.053	0	6.3065	6.0689
0.99782	0	1.1051	0	0	0	5.0386	6.9452	0	23.752	8.422	0.32718	0	6.7171	0	1.7415	1.5259	0	3.2818	1.1586	1.0755	0	35.349	0	24.549	2.3217	0.27937	15.518	0	9.2323	0.8668	3.5558	1.7155	8.9434	0.43531	1.4485	2.0019	28.036	13.58	0	10.413	0	9.0101	8.1315
0.8106	0	0	0	0	0	4.9645	4.1816	0.52962	23.016	6.8917	0	0	7.216	0	0	1.7873	0	0.44541	6.0997	0.50625	0	38.167	0	24.926	5.3319	1.2576	18.02	0.4119	5.1722	2.8189	0	3.1848	6.4071	0	0.12282	2.6317	26.703	14.103	0	6.3526	0	8.5827	8.7422
0.05958	0	0.81233	0	0	0	2.6038	6.3761	0	20.128	6.4956	0.59172	0	6.0243	0	1.2772	3.8255	1.419	0.30231	5.9612	0.89556	0	35.471	0	25.584	4.0734	0.36052	20.051	0.84409	3.1924	7.0042	0	0	10.131	0	0	4.1874	26.92	17.172	0	9.3447	0	8.9694	6.1976
0.38186	0	0.6494	0	0.10702	0	1.2739	6.6831	0.62474	18.454	7.3392	0.40776	0	5.0791	0	0	4.555	0.66449	0.26217	8.7496	0.82198	0	38.737	0	22.031	5.3511	2.7665	17.494	0	1.8636	6.5657	1.7948	0.93882	8.0957	0	0	4.5178	24.901	16.853	0	6.8878	0	7.3411	7.1988
0.32452	0	0.23527	0	0	0	4.7475	7.0288	1.3546	17.988	7.0945	0	0	6.0916	0	0	5.981	2.8997	0.59887	8.0153	1.4987	0	57.452	0	23.884	1.0093	1.6048	24.548	0	5.5385	6.2846	0	0	8.2265	0	0.4896	1.8631	25.947	14.098	0	10.447	0	13.929	8.9089
0	0	1.1238	0	0	0.50717	4.6541	5.5134	0.99834	18.535	7.044	0	0	14.727	0	0	5.4964	1.252	0.29195	9.7025	2.3348	0	70.096	0	24.344	5.6827	1.3024	22.782	0	5.3115	11.835	0.7051	5.6412	6.3096	0	1.2281	1.6073	26.005	6.7656	0	10.466	0	16.025	9.6807
0.13282	0	1.0805	0	0.87423	1.1559	1.8514	3.5009	0.80864	16.051	7.07	1.5264	0	17.738	0	0	7.1478	0	0	9.1619	2.44	0	66.868	2.3335	22.544	10.266	0	22.847	0	4.0139	24.109	0.53458	2.5304	6.3267	0	0	5.9981	25.706	19.057	0	7.4008	0.16476	16.399	10.6
0	0	1.4477	0	0.74365	6.0819	0	5.4136	0.078295	14.46	5.0642	2.5268	0	18.051	0	0	8.8276	3.8209	0	8.2247	2.2156	0	66.252	3.7734	20	6.2077	0.47452	22.319	0	0	34.165	1.5598	5.0138	6.3702	0	0	2.8645	25.935	14.957	0	10.794	0	16.003	10.636
0	0	2.2329	0	0.74374	5.7934	0	5.3778	0	14.917	6.3993	4.3084	0	18.672	0	0	10.117	0	0	5.2985	1.5814	0	81.572	4.3553	19.06	15.798	0.22669	24.904	0	3.3148	58.6	3.4952	0	2.3262	2.0262	0	4.0642	26.137	14.735	0	13.433	0	14.632	8.0461
0.064431	0	2.7715	0	1.7136	8.0117	0	5.2911	0	16.517	4.5774	3.8421	0	17.52	0	0	8.1873	0.94609	0	4.7426	1.1153	0	89.541	2.1823	18.308	18.691	0.12148	22.876	0	3.5086	67.377	0.78439	8.6404	2.7176	3.7058	0	1.6301	26.646	13.091	0	10.206	0	14.809	8.6895
0	0	1.7555	0	0	6.6353	0	3.6264	0	19.418	6.3333	4.3658	0	17.817	0	0	9.5704	1.528	0	7.2268	1.3207	0	85.461	2.929	14.535	14.698	0	23.684	0	6.0428	74.891	0	6.7848	2.7893	1.2434	0	2.8519	24.387	19.008	0	8.5439	0	12.309	12.938
0.20729	0	1.8412	0	0	5.6322	0	6.1975	0	20.036	4.8315	4.7131	0	16.548	0	0	9.1177	0	0	6.639	0.19403	0	80.935	0.9898	16.895	22.785	0	23.997	0	0	67.451	0.92909	4.3152	0	5.1041	0	0.35346	23.191	11.923	0	8.4376	0	12.963	11.355
0	0	2.552	0	0	5.1488	0	6.8866	0	17.774	6.5895	1.2939	0	13.904	0	0	8.5126	4.9365	0	5.6805	0	0	84.335	2.6204	17.043	15.874	0	21.843	0	0	66.18	0	1.6184	1.4584	3.6309	0	0	23.974	9.8624	0	7.1134	0	10.1	12.474
0	0	1.8683	0	0	3.972	0	3.58	0	15.497	7.2793	3.6544	0	12.503	0	0	8.6866	0	0	6.9508	0	0	76.274	0	15.879	16.526	0	22.176	0	0	63.786	0	4.8843	0	3.0279	0	0	22.582	4.5757	0	10.052	0	8.0085	12.639
0	0	1.8538	0	0.33043	6.6634	0	5.8026	1.2572	14.28	5.4924	3.365	0	11.198	0	0	7.4904	0	0	10.231	0	0	72.646	1.1443	16.251	10.732	0	20.818	0	0	54.502	0	3.3988	0	3.0235	0.14638	0	23.158	5.8124	0	7.1443	0	1.9438	12.757
0	0	0.47284	0	0	0.84373	0	5.0238	0	12.676	4.8582	2.3372	0	10.196	0	0	6.6002	0	0	8.874	0	0	67.081	0	16.213	7.4107	0	20.256	0	0	52.338	0	4.2819	0	2.9025	0	1.2126	22.625	0	0	7.8434	0	5.6254	12.548
0	0	1.3348	0	0	3.9973	0.11538	3.8282	0	11.755	4.8445	4.2829	0	10.15	0	0	7.3608	0	0	7.3843	0	0	61.313	0	14.142	15.397	0.51181	18.514	0	3.2369	48.046	0	6.7012	0	3.1696	0	0.94302	23.509	0.16291	0	7.6101	0	10.387	15.466
0	0	1.0609	0	0	5.5308	2.541	0.93259	0	9.9299	7.0592	1.0385	0	10.558	0	0	5.7153	0.26954	0	7.0073	1.7796	0	52.153	0	11.517	10.741	1.6275	17.33	0	0	44.537	0	8.9353	0	3.0066	1.2306	2.0335	27.16	7.587	0	10.395	0	9.7989	20.587
0	0	0	0	1.3899	4.6566	0	0.85346	0	10.19	8.1955	2.3345	0	9.8936	0	0	6.2033	4.5676	0	6.2713	7.6003	0	48.405	0	14.508	8.0377	1.5427	17.885	0	1.2496	37.534	0	13.376	0.58396	5.3735	0	2.7533	27.958	9.7994	0	8.9771	1.531	9.9978	18.87
0	0	0	0	2.138	2.2379	0	0	0	8.359	7.3168	0.99651	0	13.453	0	0	6.1679	0	0	7.9747	10.621	0	44.486	2.5686	15.107	13.473	2.6175	16.593	0	5.6627	31.874	2.2925	20.312	0	9.3389	0.3909	2.2483	27.527	4.0782	0	12.173	0	8.582	23.489
0	0	0	0	4.7455	0	1.1358	1.6423	0	7.0515	6.8243	0.50792	0	16.558	0	0	5.3572	0	0	6.6876	10.57	0	38.846	0.883	12.679	2.7491	4.8746	17.7	0	8.5349	29.738	0	25.295	0	11.435	1.1882	2.6129	24.596	11.529	0	6.9385	1.7075	8.0538	23.885
0	0	0	0	3.5416	0.39812	3.9416	0	0	10.68	8.043	0.166	0	17.185	0	0	6.5268	0	0	9.2547	11.335	0	38.418	0.53267	12.362	3.68	4.9315	15.18	0	4.3444	24.829	2.3937	31.039	0	10.137	0	3.6408	24.445	8.9051	0	8.3022	3.5216	6.9072	21.994
0	0	0	0	5.1859	1.6116	2.1349	0	0	14.815	4.6549	1.0326	0	16.802	0	0	5.765	0	0	5.3522	10.397	0	34.341	0	15.022	10.704	6.3333	16.61	0	10.989	25.272	0	36.402	0	9.0433	0	1.1385	26.111	9.154	0	9.1326	5.3071	9.7172	19.386
0	0	0	0	3.2162	0	4.0727	0	0.43131	14.423	6.3163	0.99595	0	13.762	0	0	4.1207	7.0434	0	4.944	10.858	0	29.85	0	11.36	4.0564	5.2557	19.15	0	5.1752	22.225	0.88363	44.58	0	8.3788	0	0	31.145	11.2	0	9.2024	3.4354	8.2168	22.307
0.021141	0	0	0	3.4502	0	2.7008	0	0.72864	14.522	7.0891	1.3878	0	13.912	0	0	5.1925	0	0.3991	3.4217	11.19	0	28.648	0	15.109	5.4695	5.8361	17.37	0	13.258	21.783	1.7609	50.584	0	7.7925	0	0	33.157	8.4254	0	15.174	3.315	9.3748	21.835
0	0	0	0	3.9987	0	2.0959	0	0	12.057	7.0713	0	0	11.235	0	0	3.4751	2.2227	0	8.8297	9.4228	0	23.902	0	12.922	0	6.7236	15.746	0	16.521	20.849	0	51.781	0	8.6059	0	2.0345	33.432	6.3922	0	8.5954	5.738	6.8344	23.338
0	0	0	0	2.4791	0	5.8079	0	0	11.756	5.5703	1.4582	0	11.221	0	0	1.996	7.1686	0	6.9822	12.717	0	22.559	0	12.119	6.7361	7.4398	16.622	0	26.629	20.04	0	54.157	0	10.654	0	0	33.633	7.4795	0	5.9818	5.9355	7.7113	25.798
0	0	0	0	1.9201	0.68495	4.3682	0	0	10.731	8.537	0.63339	0	10.365	0	0	4.4005	0	1.6985	4.0119	15.364	0	22.177	0	10.75	4.3472	9.4924	13.474	0	30.365	22.524	0	53.878	0	14.798	3.4026	1.6468	35.026	8.3066	0	11.442	12.542	7.9587	24.903
0	0	0	0	1.171	0	2.5937	0	0	10.738	8.3989	2.3545	0	10.379	0	0	3.3046	0	0.99702	5.844	17.621	0	18.696	0	11.454	5.0503	9.6303	12.912	0	42.095	12.856	0	55.966	0	16.143	6.1931	0	36.369	11.372	0	11.754	18.002	7.2575	23.951
0	0	0	0	2.1816	0	0.62588	0	0	9.3608	6.7498	2.3563	0	10.229	0	0	1.0152	2.1149	0	6.217	17.654	0	15.562	0	11.404	6.1792	11.458	14.833	0	48.522	13.674	0	50.69	0	15.98	9.2204	0.3717	37.755	9.2387	0	11.156	20.824	6.4537	24.733
0.050336	0	0	0	1.0967	0	1.1155	0	0	12.708	7.0044	4.0854	0	7.7054	0	0	3.0106	1.8336	1.0174	8.0796	19.651	0	12.303	0	13.788	6.0878	13.504	14.91	0	55.889	19.259	7.5257	53.166	0.59046	17.157	5.2088	3.2274	36.617	12.32	0	9.6999	26.891	10.135	24.783
0	0	0	0	1.8779	0	3.5625	0	0.28207	15.117	7.1829	2.7876	0	8.6125	0	0	3.3623	0	0.21766	9.8262	19.725	0	10.972	0	10.981	6.2608	14.485	14.159	0.78979	62.075	14.669	7.8875	51.77	0	19.997	9.0588	2.9153	33.809	6.5062	0	9.2498	32.427	7.6641	23.155
0	0	0	0	0.51177	1.7036	5.5044	0	0.33284	16.1	6.7547	3.7268	0	7.1391	0	0	3.3938	0	0.89266	7.778	15.182	0	11.35	0	8.253	11.287	14.413	10.782	3.6579	65.224	17.591	6.7614	47.015	0	19.683	8.9836	1.9737	31.772	4.4405	0	9.3619	29.04	5.078	19.179
0	0	0	0	0	0.61746	4.6626	0	0	14.329	7.1393	1.0035	0	5.1016	0	0	0.40236	0	0	8.5158	14.211	0	14.838	0	6.5121	4.5512	11.516	10.935	1.3347	68.354	15.819	8.9795	40.874	0	19.729	1.9386	0	29.131	4.1375	0	9.3588	24.678	7.7074	19.476
0	0	0	0	0.065028	0.19332	3.9267	0	1.4324	12.962	6.1422	1.2187	0	6.0125	0	0	1.0388	0	0.44417	10.529	13.083	0	9.1884	0	5.4536	1.6396	10.674	9.4334	6.1677	69.012	18.261	7.0296	37.048	0	18.006	3.9009	0	28.575	0	0	7.4038	20.112	6.3196	16.893
0	0	0	0	0.26164	0.2505	4.0896	0	0.23703	11.161	4.1843	1.1005	0	5.8631	0	0	1.9864	0	0.32991	6.5705	11.058	0	10.01	0	6.4829	0	9.2997	8.5508	4.9781	64.516	15.871	0	30.937	0	16.412	0	0	28.738	0	0	7.3833	18.758	6.2244	16.586
0	0	0	0	0	0.71139	2.7017	0	0.0095598	10.385	3.0797	0	0	4.159	0	0	1.8996	0	1.5323	10.253	11.1	0	10.812	0	5.086	7.6739	8.164	10.137	5.2127	61.555	13.588	4.3427	29.393	0	16.032	2.1948	0	29.842	0	0	6.0586	17.819	5.3232	12.017
0	0	0	0	0.80479	3.3661	1.4302	0	2.4395	9.5413	3.8326	0	0	5.5711	0	0.18699	1.3457	0	0	2.8394	10.195	0	6.5142	0	3.9506	4.7922	7.7483	10.872	3.0772	55.616	17.639	2.0522	25.788	0	15.692	0	0	28.908	0	0	5.9027	15.209	2.8754	11.941
0	0	0	0	0.7466	1.9096	2.4678	0	0	8.8055	2.4598	0	0	3.8812	0	0	2.7527	2.4746	2.0647	7.609	8.9262	0	5.5866	0	7.0052	0	6.8176	10.353	4.2811	53.315	12.853	3.2118	27.501	1.1437	15.636	0	0	26.451	0	0	6.9687	10.684	5.608	13.305
0	0	0	0	0	1.2184	2.1676	0	0.25281	7.9909	3.6215	0.58942	0	3.0829	0	0	2.0666	0	0.39691	5.7167	7.2775	0	9.2756	0	7.3374	0	7.9343	6.9136	2.3845	47.339	11.976	1.8997	24.286	0	13.147	0	0	29.494	0	0	6.5239	9.0044	1.1293	11.926
0.015925	0	0	0	0.030541	0	0	0	1.7019	6.6334	1.6522	0	0	5.0455	0	0	0	0	3.273	1.8153	6.9519	0	5.9954	0	2.2927	0	6.0085	8.4596	1.9569	41.698	14.835	1.2251	14.908	0	14.431	0	0	28.037	5.0508	0	0.40213	4.9956	1.5473	11.37
0	0	0	0	0	0.67658	0.79099	1.0815	2.2391	6.4645	2.6463	0.48471	0	2.8069	0	0	0	0	0.39536	2.5519	7.2359	0	10.542	0	5.878	0	3.8732	10.067	4.7039	38.145	12.498	3.0824	11.606	0.94487	12.331	0	0	26.671	1.1362	0	0	5.3694	0.29748	9.9234
0	0	0	0	0	2.0106	1.5986	0.47192	1.0005	9.5536	2.2795	0.24209	0	3.6359	0	0	0.14778	0	0.65667	6.3251	5.9597	0	12.956	0	2.3327	2.5728	4.0706	8.7197	0	28.918	14.134	2.54	8.9202	2.1923	11.037	0	0	27.893	2.2686	0	1.4139	2.5825	0.73919	7.3039
0	0	0	0	0.15473	2.1403	2.0945	0	0.47485	9.314	1.4983	0.087883	0	3.2254	0	0	2.0762	0	1.9956	4.7319	6.2916	0	37.581	0	4.9215	0	3.5847	12.223	0	31.74	13.85	1.1463	8.8435	1.5211	8.3308	0	0	28.477	0	0	4.5709	4.6241	1.9651	10.184
0	0	0	0	0	3.2963	0	0	3.4198	9.104	1.5428	0	0	0.021755	0	0	1.7381	0	1.9235	8.0263	5.5228	0	62.351	0	5.4949	0	2.7693	11.668	0	37.321	17.151	0	10.214	0	9.7536	0	0	28.028	0	0	5.9445	0.31743	3.4656	10.228
0	0	0	0	0	2.1839	2.2896	0.036561	2.6178	7.39	1.3323	0	0	2.4819	0	3.334	0.84349	0	3.0222	8.6207	2.8648	0	65.946	0	4.2711	4.6365	3.3669	7.6357	0	25.95	14.39	0	9.6275	0	11.87	0	0	28.002	0	0	3.8161	0	3.9813	7.6348
0	0	0	0	0.29021	1.7972	3.2938	0	1.5579	5.8594	1.9588	0	0	1.1765	0	1.8205	1.6989	0	2.3021	7.452	2.7356	0	61.168	0	6.7498	0	2.1049	8.4725	0	29.297	9.4964	0	7.827	0	8.7299	0	0	31.23	0	0	1.9248	0	1.4026	6.2106
0.096811	0	0	0	0.93073	0	2.9717	0.3055	1.2346	4.5961	0.97061	0	0	1.4706	0	0	0.79748	0	2.1068	8.5277	2.9057	0	59.293	0	9.914	6.2489	1.6496	10.418	0	24.271	5.0575	3.2237	6.7343	0	6.0751	0	0	31.841	0	0	6.4813	0.8425	2.1477	8.3881
0	0	0	0	0	1.866	1.2443	1.8104	0	5.7183	1.7788	0	0	0.81763	0	0	0.8511	1.6348	3.7602	8.0608	3.1328	0	59.127	0	9.3911	4.1278	0.05098	8.3602	0	20.22	4.7043	1.4767	7.1737	0	4.6776	0	0	30.105	0	0	5.6905	0	2.0748	7.7519
0	0	0	0	1.6629	1.5204	0	0.70411	0.38231	5.5491	3.2557	0	0	0	0	0.47338	0.58845	0	4.731	9.5857	2.2142	0	54.278	0	7.7072	2.7562	2.1684	9.4983	0	14.712	6.0209	0.78098	5.1532	0	4.3261	0	0	30.998	0.57266	0	7.7593	0	2.3919	7.557
0	0	0	0	0	0.59513	1.092	1.5237	0	6.6703	1.1927	0	0	0.84062	0	2.0415	1.871	0	4.5551	7.8514	3.0256	0	54.54	0	9.589	1.6079	0.67144	12.327	0	18.724	10.432	0	8.6363	1.574	4.3353	0	0	30.17	2.4029	0	3.897	0	7.4014	9.8161
0	0	0	0	0	2.081	2.0444	2.7759	0	8.2689	2.3893	0.063704	0	0	0	0	1.6671	0	3.3294	7.4722	1.2024	0	47.697	0	7.1738	0.61255	0	11.8	0	15.714	16.573	0	6.8356	1.3556	4.4544	0	0	24.767	0	0	8.4367	0	3.5344	5.8356
0.14543	0	0	0	0	1.5144	0.34263	2.9688	0	12.302	2.5348	0	0	0.36246	0	0	3.8608	0	4.616	9.1407	1.2364	0	46.063	0	7.8857	4.3639	0.66711	6.8299	0	13.72	14.856	1.3898	5.1043	2.5563	3.8305	0	0	25.857	0	0	8.9087	0	4.4661	8.9293
0.30738	0	0	0	0.62535	1.4627	1.8349	3.0034	0	12.75	4.267	0	0	0.58284	0	0	5.3823	0	2.562	13.609	0.15287	0	38.677	0	6.3551	3.7621	1.0572	9.5656	3.3701	13.581	18.305	0.214	2.5694	2.3097	3.3779	0	0	22.498	0	0	5.618	0	6.056	6.3522
0	0	0	0	0.069482	1.1681	0	5.2009	2.6846	14.459	4.9527	0	0	0	0	0.52903	3.2392	0	3.7062	10.656	1.4049	0	37.699	0	6.5737	0	0	11.503	5.1041	8.0057	24.116	0	1.0917	3.17	6.0265	0	0	24.052	0	0	10.103	0	6.7179	5.8357
0.0079349	0	0	0	0	0.23518	0	4.686	1.3374	16.581	5.8044	0	0	1.1415	0	0	1.2667	0	3.3462	6.3966	1.0215	0	38.281	0	4.1398	0	1.3831	12.968	0.76003	13.152	19.184	0	4.6356	2.9939	4.9122	0	0	25.126	0	0	5.6297	0	6.4801	5.5715
0.052808	0	0.45556	0	0	0	2.8318	4.9783	0.40988	18.953	5.7277	0	0	0	0	0.41806	0.99567	0	2.8242	9.6796	0	0	36.416	0	7.2021	3.6722	1.1308	13.265	2.3456	3.8031	22.457	0.65053	2.7408	3.7508	6.1159	0	0	22.526	0	0	7.5194	0	6.7867	5.3151
0	0	0	0	0.33288	0	1.1307	6.2885	0	20.303	7.3288	0	0	0.804	0	0	2.3389	0	4.4142	10.532	0.5473	0	38.425	0	7.6623	3.7508	1.0197	12.075	2.9768	4.0758	23.471	0.46978	2.651	4.297	2.8929	0	0	23.265	2.9392	0	6.1681	0	8.3475	4.9149
0.63593	0	0	0	0	0.36855	2.3782	4.5692	0.76245	23.607	6.6379	1.61	0	0	0	1.2451	3.5217	0	0.78726	13.222	0.42194	0	40.731	0	7.2471	0.60658	3.5979	11.68	0.78909	10.135	18.573	5.4032	3.0288	8.0403	4.1037	0	0.8658	21.475	0	0	10.275	0	9.6415	8.5237
0.35531	0	0.85615	0	0	0	4.1826	6.9564	1.1512	31.461	7.6975	0.094858	0	1.934	0	2.0071	2.2305	0	2.5418	7.4984	0	0	38.264	0	9.0196	4.6361	4.448	10.323	1.9749	9.2518	18.225	5.0262	2.793	6.6382	3.5024	0	0.028165	19.632	0	0	6.8446	0	8.943	7.2687
0.036425	0	0.24949	0	0	0	1.7734	4.7238	2.435	33.677	9.5807	3.7491	0	0	0	2.7585	1.7943	0	3.5855	11.045	0.22715	0	36.084	0	7.1474	0	4.8244	10.925	2.5	8.1233	19.841	5.0601	4.3935	5.8064	5.1441	0	0	17.456	3.5907	0	4.596	0	7.1432	6.1846
0	0	0.59539	0	0	0.96833	1.4587	6.046	4.0645	32.682	8.7061	3.1279	0	0	0	2.1258	1.749	0	5.5027	10.789	1.3553	0	37.297	0	7.3545	0.97943	4.0999	9.7322	3.7772	8.2083	16.137	10.224	6.5012	5.8739	7.07	2.1995	0	17.694	6.108	0	8.6353	0	7.6555	9.228
0	0	0.29009	0	0	1.5939	0	4.8604	2.3301	32.085	10.879	3.0968	0	0	0	0.31475	3.6953	0	4.8284	9.4678	0.82747	0	38.224	0	10.449	0	4.8688	8.7039	5.8309	7.7402	18.779	6.2078	2.6742	4.9759	5.6439	2.8463	0	16.5	13.7	0	5.3668	0	5.6246	7.5289
1.0263	0	1.4069	0	0	2.9629	3.8836	5.602	2.7822	30.625	9.8825	0.62837	0	0.03304	0	0.34116	2.6133	0	3.674	9.6091	2.5614	0.6088	39.492	0	10.409	1.4543	4.1458	12.768	3.074	7.6723	14.56	5.6379	5.8899	9.2991	6.7968	5.5572	0	16.325	6.3755	0	9.6778	2.2226	8.6038	9.112
0.97259	0	0.07585	0	0	2.6364	0.8852	7.0638	3.6726	29.228	12.942	1.6596	0	0	0	4.4364	2.0146	0	4.0971	11.718	2.3705	0	37.566	0	6.5123	0.99957	2.9253	13.912	4.5168	4.4301	15.005	8.9569	6.0022	9.0147	5.9665	4.5688	0.22572	14.632	12.093	0	9.639	0.34123	11.353	8.9563
0.25211	0	1.1569	0	0	3.5166	3.672	8.6906	2.9837	27.828	13.897	0.63385	0	0	0	2.1746	2.0644	0	3.0337	12.784	1.7429	0.68667	41.088	0	8.9208	3.1696	4.0205	12.147	6.2411	9.4855	15.388	11.074	4.7038	9.8876	7.7728	6.986	0.013686	13.989	13.667	0	8.4976	0.19272	11.913	7.0419
1.1915	0	1.2111	0	0	3.4319	4.3382	9.1492	5.3269	25.407	16.556	3.4338	0	0	0.2036	0.49716	0.90462	0	5.3126	13.236	1.5752	1.5721	42.685	0	10.592	4.5689	4.4179	13.044	8.3667	9.9562	9.7971	9.1315	5.2633	11.518	9.1279	11.082	3.6268	13.874	15.838	0	12.572	1.162	20.98	8.1762
1.3422	0.39146	2.3872	0	0	4.3473	1.9256	14.196	4.9063	29.913	17.768	0.99111	0	0	0	4.1971	1.6231	0	3.6996	13.745	1.1935	2.781	42.178	0	12.55	8.2516	3.0735	12.978	11.915	8.3415	14.826	10.609	4.3853	10.89	7.8744	18.901	2.8458	13.557	25.226	0	13.921	0.20406	20.785	9.4477
1.5813	0	1.6386	0	0	3.8685	7.2245	12.626	3.9914	36.78	22.508	2.2659	0	0	2.3032	5.7758	0.89559	0	4.5613	14.331	2.8847	0.24829	43.581	0	10.503	8.2982	3.5563	15.831	11.955	14.668	13.721	13.45	0.46412	13.152	9.4203	17.127	1.4165	15.05	22.366	0	15.597	1.112	20.736	6.3107
1.3369	0	2.4362	0	0	3.5686	3.6962	14.517	3.1579	36.253	21.377	0.5771	0	0.51623	0	1.905	2.6809	0	4.4152	13.71	3.3371	0.7934	47.298	0	12.693	0.51709	2.8987	14.927	8.8653	7.5919	18.384	12.178	3.7559	15.353	7.6642	14.505	2.8696	12.787	25.58	0	15.05	0.59569	19.684	7.3942
1.7715	0	2.6711	0	0	2.8907	3.1413	15.431	2.9448	37.305	20.599	2.7816	0	3.765	0.22068	2.5471	0.77657	0	3.3089	17.185	4.6451	1.9095	48.665	0	14.822	7.0575	3.7222	16.572	10.496	8.5393	15.092	16.203	3.9831	18.338	6.5324	18.272	6.4892	16.292	20.489	0	16.982	2.2757	18.486	8.7631
0.89689	0	3.5125	0	0	0.63756	3.8265	15.269	0.24666	33.68	21.024	2.3103	0	12.334	0	1.0151	0.92028	0	4.5605	19.324	4.6211	0	37.898	0	19.924	9.2039	3.1918	16.337	7.354	10.422	9.6448	9.5659	0.96365	13.93	3.734	14.95	7.1942	12.452	21.213	0	17.337	0	16.407	5.2545
0.69928	0	2.5949	0	0	2.8281	1.6971	14.602	1.0141	29.983	17.765	1.6339	0	17.564	0	5.5008	2.0829	0	2.4418	15.809	4.0341	0.61281	40.987	0	17.59	6.7467	4.498	15.15	5.0793	9.7292	10.073	9.1861	2.249	12.257	2.6954	10.542	4.7302	15.026	25.55	0	13.203	0.89958	17.093	9.0045
0	0	2.0751	0	0	2.1088	4.2383	11.557	0.53414	28.756	17.263	2.7348	0	16.93	0	3.4025	0.36389	5.0015	2.6057	11.941	4.0577	0.33558	40.829	0	13.143	5.2992	1.9887	16.868	7.6358	5.4473	10.265	10.584	0	16.303	2.7735	11.344	5.805	15.414	29.105	0	12.991	0	15.461	7.2032
0	0	1.8332	0	0	3.1533	4.6682	12.73	0.72232	27.641	15.799	2.5323	0	17.396	0.17025	0	1.7569	0	3.4756	9.18	1.8992	0	38.175	0	11.834	0	1.6889	14.26	5.0922	3.1534	9.057	2.146	1.1058	9.4825	3.7015	10.745	2.2629	10.028	24.099	0	8.8486	0	10.581	2.865
0	0	1.1678	0	0	1.1188	1.8991	12.045	0	26.231	16.242	2.4449	0	14.87	0	0	0.65569	1.2009	5.6392	16.513	4.3375	1.9971	33.366	0	14.772	5.9196	1.974	12.508	3.8374	9.6981	7.9499	7.2714	0	12.113	0.3802	10.892	2.1191	13.678	17.423	0	8.136	0.61702	10.805	6.6003
0	0	3.7249	0	0.3973	0	3.6207	11.278	0	22.917	15.8	0	0	15.005	0	0	1.0349	0.62518	2.1701	11.863	3.325	0	34.375	0	15.728	7.6406	1.0371	13.885	4.1102	5.477	9.685	3.8073	0	12.652	0.18257	7.1102	4.0447	13.459	17.981	0	12.01	0	12.515	5.0694
0	0	2.8192	0	0.039067	2.3169	0	8.6271	0	19.727	14.95	0	0	12.9	0	0	2.0546	0	1.9222	13.642	3.0411	0	31.986	0	18.472	3.7557	0.79558	13.144	0.72237	5.6373	4.369	6.9643	0	12.075	0	3.8632	2.422	14.64	16.23	0	11.695	0	7.5838	7.2889
0	0	2.3819	0	0.7301	0	0	8.9136	0	18.679	13.951	0	0	12.462	0	0	3.1335	0.79605	0.57014	13.376	3.1865	0	29.961	0	17.933	5.0983	0	15.317	0	5.1142	6.995	7.7762	0	10.296	0	0.96044	0	13.88	12.811	0	15.886	0	4.1915	4.8953
0	0	2.5065	0	0	0	0.16276	6.401	0	17.723	13.127	0	0	10.744	0	0	1.0465	5.4927	0	11.404	2.993	0	26.873	0	14.963	7.271	0	15.448	1.4557	5.2346	2.9899	2.1967	0	11.754	0	1.6747	1.5721	14.118	5.3784	0	8.861	0	9.4175	5.3765
0	0	0.87362	0	0	0	1.9895	5.6144	0	15.279	10.034	0	0	8.2332	0	0	4.3397	5.3727	0.4758	12.146	3.372	0	23.414	0.48272	17.065	4.0882	0	16.725	0	0	5.7815	5.5723	0	7.8114	0	2.4372	0.94956	15.445	10.607	0	10.485	0	13.184	6.2997
0.30703	0	2.3757	0	0	0	0.40624	6.7809	0	15.388	10.348	0	0	8.0725	0	0	1.4927	7.2338	0.053178	9.9599	1.9793	0	24.437	0	14.227	5.2372	0.020376	12.602	0	2.7622	0	2.2294	0	6.4209	0	0.86846	3.07	14.681	6.5304	0	12.195	0	12.979	6.9419
0	0	0.63833	0	2.315	0	0.98645	4.7781	0	15.344	9.769	0	0	8.0658	0	0	0.66467	5.9392	1.524	12.358	1.3356	0	20.513	0	16.475	9.2404	0	11.958	0	6.2856	1.3508	1.6	0	6.4244	0	0	0.080926	12.751	5.4598	0	5.7053	0	13.37	5.7373
0.16197	0	0.079937	0	0.12089	0.14805	0.2505	6.7826	0	12.797	9.0559	0	0	7.1529	0	0	2.3302	7.595	1.6193	7.7962	1.1272	0	18.416	0	14.658	4.6519	0	12.855	1.0627	3.7845	9.1932	2.8937	0	6.1572	0	0	0.91859	11.093	10.586	0	6.378	0	6.7151	3.1172
0	0	0.87032	0	0	0	1.6353	2.8157	0	11.381	6.4395	0	0	6.0492	0	0	2.2389	2.2094	0	7.8431	0	0	15.886	0	14.523	6.9387	0	7.8986	0	2.0238	5.0724	1.7274	0	6.8045	0	0	0	13.649	5.8094	0	9.292	0	9.5377	4.9427
0	0	1.3849	0	0	0	1.9869	3.5224	0	9.7517	7.369	0	0	5.6925	0	0	0	8.5439	1.191	8.5878	0	0	21.528	0	10.81	0.48726	0	5.1016	1.687	0.17311	0	0.89344	0	3.0201	0	0	0.92358	11.018	8.5178	0	6.3168	0	7.422	3.592
0	0	1.0599	0	0	0	2.7666	3.2928	0	9.8644	6.5092	0	0	6.4036	0	0	0	2.7551	2.3295	7.8499	0	0	17.66	0	6.4902	2.7186	0	7.5643	3.3313	2.964	3.2432	0	0	2.0634	0	0	0	10.726	6.7995	0	6.7326	0	8.5503	2.3711
0	0	0	0	0	1.094	0	5.4495	1.6995	7.3065	4.2175	0	0	5.4806	0	0	0	9.052	0	4.9692	0	0	17.462	0	5.629	0.89692	0	6.9175	1.3927	0	2.4841	0	0	2.9503	0	0	0	8.6297	6.3884	0	4.8239	0	3.8552	0
0	0	0	0	0	1.4198	1.5443	2.5676	0	6.1101	5.5633	0	0	5.5854	0	0.44372	0.48658	5.0444	0	4.0124	0	0	16.669	0	1.507	0	0	5.2096	3.5602	0	3.0817	0	0	0.58296	0	0	0	5.5469	5.5638	0	3.8177	0	5.0033	0
0	0	0	0	0	0.51154	0	2.2017	2.0738	4.5604	4.8238	0	0	4.5124	0	0	0	0	0	1.3344	0	0	16.72	0	3.1113	0	0	3.7708	4.3577	0	0.090917	0	0	0	0	0	0	3.9395	7.7911	0	0.83833	0	0	0
0	0	0.14647	0	0	0	0	1.7122	2.1253	5.8216	3.84	0	0	3.9628	0	0	0	0.95716	0	5.6313	0	0	17.311	0	4.7969	0	0	7.0668	1.4039	0	2.9701	0	0	1.7658	0	0	0	5.8807	10.571	0	5.4818	0	2.3404	0
0	0	1.1792	0	0.18991	0.16507	1.5342	4.817	1.3077	3.6445	5.0074	0	0	2.7434	0	0	0.67277	0.21563	0	3.7167	0	0	20.738	0	4.2915	0	0	7.9929	0	0	9.0742	0	0	1.2033	0	0	0	7.5654	0	0	7.295	0	3.902	2.3714
0	0	0.56208	0	0	0	0.25884	2.1249	0	3.7755	5.9138	0	0	2.4375	0	0	0	1.981	2.1976	3.5534	0	0	26.602	0	8.3678	0	0	5.1639	0	0	7.1107	0	0	1.8822	0	0	0	5.43	0.47393	0	5.1552	0	4.3592	1.7889
0	0	0	0	1.0403	1.8637	3.5954	1.6336	0.73395	3.0979	6.1722	0	0	1.1685	0	0	0.46278	3.7108	1.2821	9.392	0	0	63.95	0	6.1791	0	0	6.3071	0	8.1641	7.0704	0	0	0.37977	0	0	0	6.2163	2.5024	0	7.1854	0	6.6148	2.7264
0	0	0.20508	0	0	0.64051	2.5894	0.4794	0.64634	1.8819	4.7158	0	0	3.8294	0	1.9628	0	3.4448	0.06505	5.4112	0	0	79.931	0	7.8678	0	0	6.1236	0	3.6569	8.4573	0	0	0	0	0	0	5.1302	3.4734	0	4.7541	0	3.9693	2.4385
0	0	0	0	0	2.2751	2.1608	1.8152	2.2028	2.5965	4.5598	0	0	7.8088	0	0	0	6.2209	1.8438	7.3255	0	0	82.463	0	6.1583	0	0	4.5214	0	0	11.21	0	0	0	0.25201	0	0	5.2028	3.1559	0	1.7396	0	7.4785	0.46881
0	0	0	0	0	1.3131	0	1.7344	2.7173	1.8635	4.6865	0	0	9.0732	0	0	0	3.1015	0	8.4241	0	0	79.644	0	1.8392	0	0	5.4853	0	0	10.899	0	0	0	0	0	0	3.1382	8.8429	0	4.5684	0	3.6761	2.0746
0	0	0	0	0	2.6093	0	3.4392	4.5984	1.1703	3.8044	0	0	9.0909	0	2.0491	0	0	1.8411	4.8824	0	0	75.142	0	3.6905	0	0	3.762	0	0	8.2795	0	0	0	0	0	0	3.0365	5.6506	0	2.9594	0	1.267	4.6055
0	0	0.13539	0	0	0	0	1.9396	1.782	0.87414	3.8208	0	0	9.2197	0	0.24302	0	0	0.27912	4.157	0	0	73.427	0	1.4416	0	0	3.6627	0	0	6.4072	0	0	0	0.89346	0.39594	0	2.8898	2.5726	0	4.7204	0	5.9847	4.5967
0	0	0.01226	0	0	1.9892	0	2.198	2.5716	2.1913	4.669	0	0	7.5238	0	0.3276	0	0	0	6.4002	0	0	66.183	0	3.5664	0	0	3.0346	0	0	7.8094	0	1.0971	0	0.6382	0	0	3.9729	0	0	4.844	0	6.901	4.8219
0	0	0	0	0	0.082705	0	1.2118	2.554	0	4.8956	0	0	7.1913	0	4.112	0.20698	0	0.047736	4.8772	0	0	64.119	0	3.4621	0	0	1.9314	0	0	6.9915	0	1.0658	0	3.9233	0	0	4.732	1.2978	0	4.4573	0	7.2114	6.9164
0.048506	0	0	0	0	0.53135	0	0	1.8996	0.54892	3.106	0	0	6.6887	0	0	0.16175	3.1251	0.016819	3.0592	0	0	55.494	0	0.47233	0	0	4.5456	0	1.4236	4.4987	0	2.0566	0	1.2502	0	0	5.0196	3.9152	0	2.2368	0	3.1446	9.7232
0.35721	0	0	0	0	2.2852	2.0387	1.0348	0.45567	0.15802	3.7813	0	0	5.6583	0	1.4113	0.59113	0	0.73079	4.2276	0	0	50.522	0	3.8902	0	0	5.5054	0	0	8.4014	0	0	0	0.76761	0	0	2.0324	2.3211	0	2.2995	0	8.2497	8.4707
0	0	0	0	0	1.9403	0	2.958	2.8397	0	5.2826	0	0	3.1066	0	0	0	0	0	3.8648	0	0	51.795	0	1.4207	0	0	0.50232	0	0	7.2414	0	2.9683	0	2.7127	0	0	1.7053	0	0	3.0392	0	5.5838	5.7475
0	0	0	0	0	1.3489	0	3.0942	1.589	0	5.6351	0	0	4.303	0	0	0	0	1.2251	2.2814	0	0	47.759	0	1.7998	0	0	1.8974	0	0	2.817	0	0.97378	0	2.1829	0	0	2.0308	0	0	2.485	0	4.7179	5.6808
0	0	0	0	0	3.9899	0	1.5787	0.33012	0.030667	4.3419	0	0	2.8607	0	1.1805	0	0	0	2.9726	0	0	46.57	0	4.796	0	0	5.2192	0	0	4.4983	0	2.579	0	2.694	0.59314	0	0.62856	10.261	0	0.59593	0	8.6729	6.1838
0	0	0	0	0	3.0632	0	0.96789	1.7348	0	3.1725	0	0	3.0819	0	0	0	0	0.63566	0	0	0	38.883	0	1.808	0	0	2.5795	1.2277	0	8.4431	0	0	0	3.1041	0	0	0.37754	0	0	0	0	5.7547	6.8152
0	0	0	0	0	0.73195	0.27945	3.1652	2.6942	0	3.1967	0.23684	0	5.0065	0	0	0	0	1.0097	0	0	0	40.115	0	1.9884	0	0	6.5122	7.4648	0	13.346	0	0	0	6.069	0	0	1.0703	0	0	0	0	2.2328	4.3258
0	0	0	0	0	0	0	1.9784	1.6491	0.93182	4.3931	0	0	4.2323	0	1.9468	0.21515	0	0	4.8677	0	0	38.869	0	2.9314	0	0	5.8076	4.6648	0	12.078	0	0	0	2.0528	0.19124	0	0.71026	6.5747	0	2.3974	0	4.2313	1.5711
0	0	0	0	0	0.41904	0	2.2697	0	0	3.4021	1.3662	0	2.9772	0	2.16	1.2941	0	0	1.9357	0	0	39.793	0	7.0604	0	0	10.155	5.4089	3.241	17.846	0	0	0	0	0	0	3.2334	5.4186	0	2.271	0	5.6816	1.8509
0	0	0	0	1.8301	0	0	4.6632	0.52984	1.1848	3.7307	0	0	3.4486	0	3.3693	1.2733	0	1.1878	6.6302	0.52174	0	37.558	0	7.0443	0	0	7.6747	4.2791	1.4714	24.51	0	0	0	0	0	0	4.7685	6.264	0	5.9929	0	8.8237	1.081
0	0	0.28302	0	1.6107	0	0	0.76887	1.0348	1.6375	4.7032	0	0	3.1252	0	4.2307	0.76409	0	0	3.2953	0	0	38.251	0	5.9492	0	0	6.2855	0	0.56894	25.765	0	0	0	0	0	0	3.9024	9.8582	0	7.9295	0	9.5884	0.80196
0	0	0	0	0.22977	0	0	0	0	0.63007	4.031	0	0	3.7545	0	4.9798	1.3931	0	2.0758	2.6319	0	0	39.554	0	7.5776	0	0	7.451	0.0089915	3.2925	29.559	0	0.27888	0	0	0	0	2.3838	10.011	0	2.928	0	8.2032	1.2856
0	0	0	0	0	0	0	0	0.88394	1.1572	3.5101	0	0	2.58	0	6.5037	0.498	0	2.935	2.9396	0	0	37.879	0	9.0314	0	0	4.6424	4.9291	4.2886	22.381	0	0	0	0	0	0	2.5445	2.3192	0	5.9854	0	5.1043	1.9646
0	0	0	0	0	0	0	0.955	2.5649	0.99598	2.2716	0	0	2.2556	0	3.4774	0.24003	1.3279	3.29	4.4613	0	0	34	0	6.9084	0	0	2.9392	2.4025	0	22.633	0	0	0	0	0	0	3.4543	1.1471	0	7.6798	0	10.501	4.481
0	0	0	0	0	0	0	1.4342	0.81622	2.3981	1.3693	0	0	1.9636	0	6.2609	0.050079	0.17358	3.6746	1.2985	0	0	31.525	0	4.7991	0	0	4.3308	4.3978	0.53259	23.418	0	0	0	0	0	0	5.5314	6.0886	0	5.4337	0	9.8006	1.7183
0	0	0.023867	0	0.10753	1.2745	0	0.78086	1.5487	5.1508	2.1051	0	0	3.7745	0	4.0295	0	0	3.4144	2.0358	0	0	29.412	0	4.1715	0	0	5.936	0.11527	1.1376	25.914	0	0	0	0	0	0	3.3798	6.0614	0	8.7209	0	9.7426	3.373
0	0	0.47246	0	1.2274	0	0	0.21591	0.82124	3.183	2.7646	0	0	4.9219	0	6.7418	0	0	1.7142	0.27452	0	0	26.227	0	5.0924	0	0	2.0137	3.906	0	23.325	0	0	0	0	0	0	3.6334	1.1434	0	4.0963	0	4.6551	2.48
0	0	0	0	0	0.92887	0	2.1155	1.4785	3.7559	1.5213	0	0	3.8469	0	2.5341	0	0	0.28996	4.0125	0	0	25.081	0	5.7493	0	0	2.8674	0.31277	4.5221	23.778	0	0	0	0	0	0	1.835	1.803	0	1.971	0	5.5609	2.0698
0	0	0	0	0	0	0	4.0637	0	1.1392	3.7706	0	0	5.1972	0	2.4873	0.19068	0	0.43417	4.2405	0	0	26.692	0	5.3935	0	0	5.1494	2.6805	2.4915	22.401	0	0	0	0	0	0	6.9453	0.9951	0	4.2741	0	4.7858	1.1727
0	0	0	0	0.76274	1.3119	0	2.2077	0	2.2185	1.4787	0	0	5.2165	0	3.0574	0	0.62229	0.20628	2.5413	0	0	22.581	0	5.3107	0	0	4.6794	1.3599	0	18.524	0	0	0	0	0	0	2.0381	1.2393	0	3.7574	0	1.7143	3.4033
0	0	0	0	0	1.0621	0	3.1767	0	0	4.4082	0	0	4.6196	0	2.4511	0	0	0.53073	6.0398	0	0	19.929	0	3.9383	0	0	2.7129	2.4554	0	20.471	0	0	0	0	0	0	3.4048	0.78395	0	0	0	2.8814	0
0	0	0	0	0	0.25594	0	3.6818	0	0.67302	4.2751	0	0	2.3306	0	0.69629	0	0.57144	0.92095	0.95705	0	0	14.598	0	5.3402	0	0	2.7226	2.6441	1.6045	15.502	0	0	0	0	0	0	2.1024	2.6253	0	3.4558	0	3.3973	2.0509
0	0	0	0	0	0	0	5.5899	0.41635	0	3.3947	0	0	3.9375	0	2.2519	0	1.1851	0	3.6909	0	0	13.745	0	3.7312	0	0	4.7601	1.7181	0	17.309	0	0	0	0	0	0	2.1856	3.1525	0	3.4648	0	4.9878	1.8482
0	0	0	0	0.17087	0.14397	0	4.4778	0	0	5.4372	0	0	2.783	0	0	0	2.4804	0.38263	1.5412	0	0	16.201	0	3.4503	0	0	3.9353	0	0	16.631	0	0	0	0	0	0	1.7248	0	0	0.27804	0	3.4318	0.19706
0	0	0	0	0	0.01392	0	5.7566	0	0.064176	4.9731	0	0	1.8355	0	0	0	0.55406	0.52418	3.1981	0	0	17.377	0	5.5165	0	0	9.1959	0	0	15.055	0	0	0	0	0	0	1.8091	0	0	0.23229	0	4.1121	0
0	0	0	0	0	0	0	4.0619	0	0	4.6173	0	0	2.8305	0	0	0	0.63688	0	1.4594	0	0	17.305	0	4.609	0	0	4.8057	0	0	12.66	0	0	0.17528	0	0	0	1.9209	0.64968	0	3.6402	0	4.8623	1.245
0	0	0	0	0	0	0	4.9626	0	0.21118	6.848	0	0	0.28566	0	0.96629	0	2.138	0	0.54242	0	0	17.085	0	6.3173	0	0	4.0259	0	0	8.2204	0	0	0	0	0	0	2.7288	5.6335	0	1.6582	0	6.1707	0
0	0	0	0	0	0	0	7.3223	0	0	6.4807	0	0	0	0	0	0	1.8523	0	0.22686	0	0	19.027	0	4.3684	0	0	4.5783	0.66473	0	10.289	0	0	0	0	0	0	0.38995	2.9103	0	2.5195	0	3.5043	0
0	0	0	0	0.45944	0	0	6.5478	0	1.4626	7.6302	0	0	1.6537	0	0	0	0	0	0	0	0	22.398	0	6.4199	0	0	3.5854	0	0	14.94	0	0	0	0	0	0	0.45326	1.2057	0	0	0	1.7252	0.17546
0	0	0	0	0	0	0	8.996	0	0	8.3661	0	0	0.80166	0	0	0	0	0	3.8803	0	0	17.022	0	3.0755	0	0	4.8434	0	0	12.332	0	0	0	0	0	0	0.41424	0.59833	0	0.43964	0	5.304	0
0	0	0	0	0.54075	0	0	7.2106	0	0	8.5144	0	0	0	0	0	0	1.8731	0	3.6826	0	0	22.28	0	3.03	0	0	7.6086	0	0	13.937	0	0	0	0	0	0	1.1871	0.8037	0	2.7725	0	4.8617	0.03375
0	0	0	0	0	0	0	5.3617	0	0	8.207	0	0	0	0	0.34187	0	2.281	0	0.77319	0	0	23.742	0	2.8615	0	0	6.8271	0	0	11.332	0	0	0	0	0	0	0	2.6553	0	0	0	2.3565	0
0	0	0	0	0	0	0.093444	6.7566	0	0	9.8218	0	0	0	0	0	0	0	0	0	0	0	26.67	0	4.6736	0	0	8.1177	0	0	11.112	0	0	0	0	0	0	2.0946	3.4371	0	0	0	0.35364	0.10095
0	0	0	0	0	0.86518	0	4.3636	0	0	8.737	0	0	0	0	0.59996	0	1.6114	0	0	0	0	21.928	0	2.2467	0	0	7.3257	0	0	9.4786	0	0	0	0	0	0	0	3.2107	0	2.2788	0	3.1509	1.7735
0.6117	0	0	0	0	0	0	3.2738	0	0	7.6249	0	0	0	0	0	0.26768	0	0	0.27254	0	0	22.914	0	4.9396	0	0	5.4233	2.7617	0	13.351	0	0	0.35236	0	0.78233	0	1.646	5.9593	0	0	0	3.6762	2.3052
0	0	0	0	0	0.57836	0	4.7505	0	0	8.2348	0	0	0	0	0	0	0	0	0	0	0	22.375	0	3.6121	0	0	6.7281	0	0	6.905	0	0	0	0	0.34939	0	0	5.1345	0	2.0349	0	7.1158	2.2535
0	0	0	0	0	0	0	5.7261	0	0.46662	8.5819	0	0	0	0	0	0	0	0	1.0959	0	0	19.306	0	4.1085	0	0	7.026	0.32199	0	9.1508	0	0	0	0	0	0	0	2.0299	0	3.6077	0	3.2097	2.2519
0	0	0	0	0	0	0	4.6159	0	0.72028	8.0377	0	0	0	0	0	0	1.0459	0	1.3094	0	0	19.632	0	5.4105	0	0	10.227	0.42036	0	6.1338	0	0	0	0	0	0	1.2672	0.56871	0	2.1459	0	6.214	0.39801
0	0	0	0	0.0050266	0	0	6.099	0	0.67168	7.8814	0	0	0	0	0	0	0.33638	0	1.3289	0	0	20.18	0	3.7945	0	0	7.7285	0	0.24177	9.3231	0	0	0	0	0	0	0	0.11453	0	1.3658	0	1.073	0.040605
0.22123	0	0	0	0	0	0.20312	3.9558	0	0.58225	6.842	0	0	0	0	0.32581	0	0	0	0	0	0	19.348	0	2.13	0	0	5.8359	0	0	5.9242	0	0	0	0	0	0	0	0	0	0	0	0.29748	0
0	0	0	0	0	0	0	3.8392	0.12523	0	6.7398	0	0	0	0	0	0	1.7262	0	0	0	0	18.55	0	3.3369	0	0	6.3245	0	0	10.146	0	0	0	0	0	0	0	0	0	1.4507	0	1.094	0
0	0	0	0	0	0	0	3.9215	0	0.37323	4.6658	0	0	0	0	0	0	3.1509	0	1.0927	0	0	17.436	0	2.4657	0	0	5.8901	0	0	3.6895	0	0	0	0	0	0	0	2.3186	0	0	0	0.65751	0
0	0	0	0	0	0	0	2.9092	0.25788	0	5.4761	0	0	0	0	0	0	0	0	0.63939	0	0	23.197	0	2.6425	0	0	5.6844	0	0	8.3903	0	0	0	0	0	0	0	2.2275	0	0	0	0.68945	3.268
0	0	0	0	0	0	0	1.8545	0.76008	0	5.7493	0	0	0	0	0	0	2.1347	0	1.0072	0	0	23.84	0	3.0455	0	0	6.1684	0	0	4.7404	0	0	0	0	0	0	0	3.5941	0	0	0	3.0171	0
0	0	0	0	0	0	0	3.2279	0	0	4.6387	0	0	0	0	0	0	3.1212	0	0.73793	0	0	22.148	0	2.3342	0	0	6.2688	0	1.5921	3.1462	0	0	0	0	0	0	0.45465	1.6239	0	0	0	0	2.3638
0	0	0	0	0	0	0	3.332	0	0	6.8141	0	0	0	0	0	0	0.77007	0	0	0	0	19.569	0	3.4335	0	0	6.9513	0	0	3.8725	0	0	0	0	0	0	0	1.5955	0	0	0	0	0
0	0	0	0	0	0	0	3.146	0	0	4.9972	0	0	0	0	0.27978	0	0	0	1.0757	0	0	17.558	0	3.0373	0	0	6.531	0	3.6237	5.0548	0	0	0	0	0	0	0	0.81358	0	1.2899	0	5.5528	3.5379
0	0	0	0	0	0	0	1.8116	0	0	2.9408	0	0	0	0	0	0	3.4336	0	0.24374	0	0	18.943	0	2.4954	0	0	7.4728	0	0	5.367	0	0	0	0	0	0	0	0.89158	0	0	0	1.1868	0
0	0	0	0	0	0	0	2.7565	0	0	5.3636	0	0	0	0	0	0	1.2147	0	0	0	0	18.933	0	0	0	0	5.1159	0.35734	0	3.3745	0	0	0	0	0	0	0	0	0	0	0	0	0
0	0	0	0	0	1.3636	0	3.098	0	0	4.32	0	0	0	0	0	0	0.46091	0	0	0	0	21.113	0	0.86289	0	0	4.201	0	0	11.675	0	0	0	0	0	0	0	0.13922	0	1.3754	0	0	0.0069658
0	0	0	0	0	0.15078	0	1.6646	0	0	3.2459	0	0	0	0	0	0	0	0	0	0	0	20.945	0	0	0	0	3.5385	0.15908	0	10.148	0	0	0	0	0	0	0	0	0	0	0	0	1.5315
0	0	0	0	0	0	0.52775	1.5769	0.27421	0	2.7387	0	0	0	0	0	0	4.3658	0	0	0	0	25.929	0	0	0	0	3.1264	0	0	12.65	0	2.3078	0	0	0	0	0	0	0	0	0	0	1.4871
0	0	0	0	0	0.66857	0	1.079	0	0	2.2884	0	0	0	0	0	0	0	0	0	0	0	23	0	1.6499	0	0	4.3327	0	0	11.002	0	0	0	0	0	0	0	3.4806	0	0	0	0	3.7485
0	0	0	0	0	0	0	1.6395	1.9474	0	1.1573	0	0	0	0	0	0	0	0	0	0	0	23.243	0	1.5886	0	0	8.6987	0	12.617	18.142	0	5.6401	0	0	0	0	0	4.8666	0	0	0	0.96735	0.80145
0	0	0	0	0	1.408	0	0.73969	0	0	3.3108	0	0	0	0	0	0	2.3765	0	0	0	0	20.409	0	2.4581	0	0	5.414	0	26.568	14.577	0	7.2168	0.016854	0	0	0	0	1.8661	0	0	0	0	0.47279
0	0	0	0	0	2.4009	1.1071	0	0	4.7694	1.2912	0	0	0	0	0	0	1.2976	0	0.3604	0	0	14.436	0	0.10106	0	0	3.9296	0	35.125	14.866	0	10.388	0	0	0	0	0	1.5676	0	0	0	0	0
0	0	0	0	0	2.1111	0	0.25862	0	3.6581	0.49421	0	0	0	0	0	0	0	0	0.37728	0	0	16.393	0	2.2857	0	0	3.6918	0	42.447	16.032	0	12.134	0	0	0	0	0	4.3624	0	0	0	0	1.2579
0	0	0	0	0	1.2457	0	0	0	1.5865	1.1226	0	0	0	0	0	0.27696	3.611	0	1.4058	0	0	14.163	0	2.0874	0	0	7.4091	0	47.645	19.049	0	6.4074	0	0	0	0	0	2.3429	0	0	0	0.64463	0.52492
0	0	0	0	0	0.18821	0	0	0	2.7988	1.0331	0	0	0	0	0	0	0	0	5.4644	0	0	14.667	0	2.0859	0	0	7.9947	0	45.949	16.081	0	4.8387	0	0	0	0	0	0.75335	0	0	0	0	3.1856
0	0	0	0	0	1.0676	0	0	0	0.85789	3.6939	0	0	0	0	0	0	1.0905	0	0	0	0	13.986	0	2.4299	0	0	4.1172	0	44.89	16.382	0	5.3749	0	0	0	0	0	0	0	1.1138	0	0	2.6127
0	0	0	0	0	0	0	1.3868	0	1.3796	1.3728	0	0	0	0	0	0	3.5398	0	0.42891	0	0	15.458	0	4.3192	0	0	4.236	0	45.688	17.506	0	6.038	0	0	0	0	0	0.23696	0	0	0	0.1624	2.6627
0	0	0	0	0	1.8589	0	0	0.88067	1.9277	0.021477	0	0	0	0	0	0	3.1891	0	0.40657	0	0	16.937	0	0	0	0	3.6197	0	47.215	12.315	0	6.2635	0	0	0	0	0	1.8065	0	0	0	0	0
0	0	0	0	0	0	0.19171	0.30589	0	0.58017	0.10848	0	0	0	0	0	0	4.2471	0	0.82439	0	0	17.418	0	2.7946	0	0	5.4634	0	43.514	13.6	0	5.7977	0	0	0	0	0	2.7419	0	0	0	0	0.58359
0	0	0.13709	0	0	0	0	0	0	0.27014	0.4051	0	0	0	0	0	0	1.502	0	2.143	0	0	12.017	0	4.0167	0	0	8.4548	0	40.332	12	0	2.1241	0	0	0	0	0	2.5846	0	0	0	0	0
0	0	0	0	2.2431	0	0	0.071392	0	0	2.6383	0	0	0	0	0	0	0	0	0	0	0	9.4211	0	6.1204	0	0	6.4372	0	35.152	12.584	0	2.9135	0	0	0	0	0	3.7993	0	0	0	0.21957	0.55825
0	0	0.43815	0	0	0	0	2.3626	0	0	0.12849	0	0	0	0	0	0	3.6736	0	2.9484	0	0	11.472	0	9.0954	2.1545	0	5.9697	0	36.649	14.596	0	0	0	0	0	0	0	3.2125	0	0	0	1.3454	0
0	0	0	0	0	0	0	0.51047	0	0	0.30338	0	0	0	0	0	0	0	0	1.3891	0	0	14.164	0	8.2257	0.67156	0	8.1268	0	33.74	14.742	0	0	0	0	0	0	0.13094	5.2936	0	0	0	1.5418	0
0	0	0	0	1.4086	0	0	1.1051	0	0	0.94403	0	0	0	0	0	0	0	0	0	0	0	14.734	0	10.685	1.2185	0	8.0824	0	30.622	16.87	0	0	0	0	0	0	0	4.0608	0	1.6762	0	0	0.67687
0	0	0	0	1.3547	0	0	0	0	0	1.4112	0	0	0	0	0	0.68895	0	0	0	0	0	15.707	0	5.6541	0	0	7.9574	0	33.694	16.253	0	0	0	0	0	0	0	1.6326	0	0	0	0	0.98654
0	0	0	0	0.77616	0	0	0.6165	0	0	1.3434	0	0	0	0	0	0	0	0	0	0	0	14.584	0	8.0299	0	0	6.8542	0	27.735	16.642	0	0.12433	0	0	0	0	0	0	0	0	0	0	0.2902
0	0	0	0	0	0	0	0.68285	0	0	1.5134	0	0	0	0	0	0	0	0	1.167	0	0	14.272	0	3.2587	0	0	5.4233	0	31.385	17.371	0	0	0	0	0	0	0	1.8124	0	0	0	1.4391	1.0992
0	0	0	0	0.85349	0.036418	0	0	0	0	0.12611	0	0	0	0	0	0	0	0	0	0	0	11.75	0	7.6706	0	0	6.4525	0	32.582	17.957	0	0.37216	0	0	0	0	0	2.7747	0	0	0	0.54972	0.29169
0	0	0	0	1.2104	0	0.59405	0	0	0	1.51	0	0	0	0	0.18913	0	0	0	0	0	0	14.487	0	5.3025	0	0	7.0403	0	31.225	17.364	0	0	0	0	0	0	0	4.2889	0	0	0	0.78247	0
0	0	0	0	1.1744	0	0	2.0136	0	0	1.6212	0	0	0	0	0	0.21465	0	0	0	0	0	43.625	0	6.6134	0	0	6.8533	0	31.818	18.165	0	0	0	0	0	0	0	2.2347	0	2.3239	0	0	0
0	0	0	0	0	0.17086	0	0	0	0	1.4332	0	0	0	0	0	0	0	0	1.1362	0	0	61.069	0	8.2252	0	0	6.2392	0	31.103	15.675	0	0	0	0	0	0	0	0.30805	0	1.4479	0	0.299	0
0	0	0	0	2.0441	0.15656	0	0	0	0	1.3458	0	0	0	0	0	0	0	0	1.0001	0	0	63.48	0	6.8019	0	0	5.0567	0	26.314	15.936	0	0	0	0	0	0	0	4.8977	0	4.8982	0	0	0
0	0	0	0	0	0	0	0.26006	0.83096	0	1.8244	0	0	0	0	0.55495	0	0	0	0	0	0	58.673	0	6.4884	1.318	0	3.6301	0	28.757	22.409	0	0	0	0	0	0	0	2.0036	0	4.5156	0	2.8533	0
0	0	0	0	1.1063	0	0	0	0.32756	0	2.9854	0	0	0	0	0	0.87238	0	0	0	0	0	50.162	0	4.6854	0	0	7.7754	0	28.353	17.641	0	0	0	0	0	0	0.3422	5.7403	0	4.3926	0	1.5324	0.68109
0	0	0	0	0.22433	0.034716	0	0	1.4735	0	1.881	0	0	0	0	0	0	0	0	0	0	0	52.498	0	4.9132	3.7424	0	7.3442	0	31.728	22.726	0	0	0	0	0	0	0	2.345	0	0	0	0	0
0	0	0	0	0	0	0	0.67684	0.81072	0	0.48979	0	0	0	0	0	0	0	0	0	0	0	44.68	0	7.4997	0	0	6.0291	0	27.335	22.341	0	0	0	0	0	0	2.4395	2.6725	0	1.5383	0	1.6698	0
0	0	0	0	1.0853	1.2174	0	0.80128	0	0	2.2304	0	0	0	0	0	0	0	0	0	0	0	46.833	0	6.6906	0	0	6.5448	0	24.535	27.306	0	0	0.031236	0	0	0	1.5797	0.80469	0	1.0195	0	0	0
0	0	0	0	0	0.022123	0	0.26818	0	0	1.0977	0	0	0	0	0	1.102	1.6142	0	0	0	0	36.109	0	7.3815	0	0	8.7296	0	25.567	31.617	0	0	0	0	0	0	0.47174	3.5927	0	0.68485	0	0	0
0.18485	0	0	0	0.15743	0.972	0	0	0	0	1.861	0	0	0	0	0	0	1.024	0	0	0	0	34.047	0	7.1299	7.0438	0	8.177	0	21.498	39.156	0	0	0	0	0	0	0.18045	0	0	0	0	3.2695	2.7354
0	0	0	0	0	0	0	1.0177	0	0	1.1266	0	0	0	0	0	1.1758	2.9478	0.29419	0	0	0	35.236	0	10.057	8.3534	0	6.4905	0	22.482	42.279	0	0	0	0	0	0	1.291	4.3353	0	0	0	2.0998	0
0	0	0	0	0.062101	2.092	0	0	0	0	1.9107	0	0	0	0	0	0	1.0465	0.41669	0	0	0	31.305	0	7.6536	0	0	9.4292	0	18.91	36.322	0	0	0	0	0	0	1.916	0	0	4.1249	0	4.3106	0
0.054546	0	0	0	0	0	0	1.2554	0	0	2.6585	0	0	0	0	0.77706	0.37433	2.1509	1.1972	2.0189	0	0	24.631	0	8.3484	0	0	6.1952	0	13.579	31.826	0	0	0.17079	0	0	0	0.88219	4.2909	0	3.2098	0	1.2302	0.26375
0	0	0	0	0	1.1412	0	0	0	0	2.031	0	0	0	0	0	0	2.275	0.54536	1.7611	0	0	26.224	0	8.5268	0	0	4.8992	0	17.134	35.115	0	0	1.7617	0	0	0	0.43431	0	0	1.3539	0	2.0102	1.5813
0	0	0	0	0.26979	1.832	0	0.47265	0	0	1.2437	0	0	0	0	2.795	0.0058207	0.20108	2.4756	0	0	0	25.285	0	9.2012	0	0	4.8693	0	16.46	33.309	0	0	0	0	0	0	2.8602	0	0	5.9091	0	2.6599	2.4811
0.13242	0	0.14029	0	0	0	0	0	0	0	1.249	0	0	0	0	0.18271	0	0	2.0608	0	0	0	20.27	0	8.2656	0	0	4.9483	0	11.396	29.987	0	0	2.8259	0	0	0	2.4367	0.25375	0	0.82693	0	2.2927	3.786
0	0	0.34869	0	0	0	0	0.80614	0	0	1.2966	0	0	0	0	0.44057	0	0	2.3081	4.3158	0	0	17.796	0	5.8151	0	0	7.3763	0	12.577	31.774	0	0.49821	1.0576	0	0	0	1.8472	0	0	4.6426	0	0	3.5349
0	0	0	0	0	0	0	1.464	0	0	2.0611	0	0	0	0	0	0	0	2.3088	5.3256	0	0	16.616	0	7.2603	0	0	5.9208	0	13.377	30.246	0	0	0.17528	0	0	0	0	0	0	0.40605	0	0	4.9367
0	0	0	0	0	0.72605	0	1.0088	0	0	2.4495	0	0	0	0	0.62838	1.0666	0	1.0526	0.86779	0.58185	0	13.167	0	8.4639	0	0	3.8918	0	16.666	27.464	0	0	1.6378	0	0	0	0.79886	0	0	0.57446	0	0.63917	5.9521
0	0	0	0	0	0	0	0	0	0	1.8591	0	0	0	0	0	0	0	2.4029	1.909	3.3078	0	14.088	0	8.5876	1.5168	0	6.6331	0	30.364	28.253	0	2.8703	1.369	2.2094	0	0	1.877	0	0	3.2509	0	0.52697	4.4129
0	0	0	0	0	0.19979	0	0	0	0	0.88393	0	0	0	0	0	1.3013	0	1.3906	4.2257	3.3857	0	11.911	0	5.5908	3.0043	0	5.5241	0	37.228	23.4	0	6.0073	0	0	0	0	3.1926	0	0	1.0009	0	0	6.6836
0	0	0	0	0	0.75631	0	0.91157	0	0	1.1868	0	0	0	0.13799	0	0.51725	0	2.9773	3.7637	8.7456	0	9.8484	0	6.2282	0	0.18536	4.9238	0.40576	38.383	22.558	0.24896	7.3719	1.2833	5.0649	0	0	6.109	3.7358	0	3.0202	0	3.7607	6.9796
0	0	0	0	0	0	0	0	0	0	1.7489	0	0	0	0	0	0.67274	1.7501	3.6238	1.5843	10.607	0	13.569	0	7.904	1.84	2.0486	6.1152	0	46.42	27.047	1.4734	6.5774	3.9483	4.4464	0	0	7.2527	8.2177	0	2.103	0	0.87977	7.0092
0	0	0	0	0	0	0	0	0	0	0.097654	0	0	0	0	0	0.099082	0	2.0626	0.97471	8.5063	0	7.5532	0	4.9665	0.76019	0	6.6965	0	55.001	24.393	0.54481	5.3228	1.9402	4.6987	0	0	7.9324	5.1324	0	0	0	0.70223	7.0787
0	0	0	0	0	0	0	0	0	0	0	0	0	0	0	0	0	0.2097	1.3201	0.5087	7.0796	0	6.5447	0	1.354	0	0	6.8243	4.661	60.959	25.341	0	5.3117	2.829	3.0613	0	0	8.5976	6.4061	0	0	0	0	6.1233
0.057384	0	0	0	0	0	0	0	0	0	1.926	0	0	0	0	0	0	0	1.6482	0	5.7159	0	7.9542	0	7.2899	0	0	7.4448	0	68.792	22.225	0	6.225	1.5657	1.9569	0	0	8.5004	6.8306	0	2.8936	0	0	6.3856
0	0	0	0	0	0	1.168	0	0	0	0	0	0	0	0	0	0	0	2.3913	0	6.9053	0	9.8925	0	5.4489	0	0	7.6345	0	76.3	21.878	0	4.0993	1.3501	0	0	0	10.362	5.66	0	0.26068	0	0	6.0552
0	0	0	0	0	0	0	0.25432	0	0	0.68384	0	0	0	0	0	0	1.2298	0.10067	1.1037	4.822	0	6.7962	0	6.8038	0	0	9.7204	0	71.975	22.88	0	0.34988	4.3546	0	0	0	8.1082	7.4769	0	0	0	1.0295	2.9974
0	0	0	0	0	1.1064	0	0	0	0	0.95437	0	0	0	0	0	0	0.14501	1.9159	0	2.5876	0	9.4974	0	4.7061	0	0	5.6561	0	71.503	18.557	0	0	1.4582	0.64021	0	0	7.7659	1.493	0	0	0	0	2.7823
0	0	0	0	0	0	0	1.6214	0	0	0.82761	0	0	0	0	0	0	0	1.4226	0	1.6704	0	9.4876	0	2.7855	0	0	4.2614	0	69.581	20.853	0	1.9651	0	0.43324	0	0	4.4476	0	0	0	0	0	2.5056
0.055645	0	0	0	0	0	0	1.3223	0	0	1.0169	0	0	0	0	0	0.12885	0	0	4.7435	3.1245	0	13.598	0	6.7367	0	0	6.6513	0	66.701	17.726	0	3.5089	0	0.58283	0	0	8.772	0	0	2.4737	0	0	1.5925
0	0	0	0	0	0	0	0.23403	0	0	0.042769	0	0	0	0	0	0	0	1.6418	0	3.195	0	9.6902	0	6.3489	0	0	5.5547	0	64.477	19.838	0	0.35664	0.13438	0	0	0	9.6201	3.9905	0	2.8073	0	0	0.76572
0	0	0	0	0	0	0	0.065767	0	0	0	0	0	0	0	0	0	0.52668	0	0	1.0104	0	7.9531	0	6.4558	0	0	4.1917	0	64.468	15.917	0	0	0.16449	0.30809	0	0	9.1564	0.69904	0	1.4446	0	0	1.3132
0.2211	0	0	0	0	0	0	0	0	0	0	0	0	0	0	0	0	0	0	0	1.2705	0	11.007	0	2.6166	0	0	2.6145	0	55.557	15.995	0	0	0	1.1242	0	0	8.0255	0	0	0	0	0	2.9976
0	0	0	0	0	0	0	0	0	0	0.54806	0	0	0	0	0	0	0	0	0	0	0	8.2004	0	4.2305	0	0	4.2941	0	52.913	11.651	0	0	0	1.303	0	0	7.0302	0	0	0	0	0	4.2701
0	0	0	0	0	0	0	0	0	0	0	0	0	0	0	0	0	0	0	0	0	0	7.405	0	3.7433	0	0	2.207	0	48.678	10.869	0	0	0	1.4159	0	0	6.378	0	0	0	0	0	4.2985
0	0	0	0	0	0	0	0.53936	0	0	0	0	0	0.45695	0	0	0	1.9987	0	0	0	0	7.6715	0	2.896	0	0	3.8444	0	40.971	13.782	0	0.39605	0	0	0	0	8.1478	0	0	0	0	0	2.1508
0	0	0	0	0	0	0	0.74446	0	0	1.2634	0	0	0	0	0	0	0	0	0	0	0	6.0521	0	2.0619	0	0	2.5158	0	43.235	8.5996	0	0.82641	0	0.44262	0	0	5.5624	0	0	0	0	0	4.9363
0	0	0	0	0	0	0	0.13889	0	0	2.7525	0	0	0	0	0	0	1.7196	0	0.27551	0	0	4.4916	0	3.4738	0	0	1.7593	0	37.676	7.8124	0	0	0	0	0	0	6.5664	1.0103	0	0.54873	0	0	1.77
0.11814	0	0	0	0	0	0	0.29551	0	0	2.1576	0	0	0	0	0	0	0	0	0	0.24158	0	8.9316	0	5.6008	0	0	4.2302	0	35.608	12.216	0	0	0	0	0	0	8.0304	0.041864	0	3.3476	0	0	1.2052
0	0	0	0	0.081062	0	0	0.67654	0	0	1.5501	0	0	0	0	0	0	0	0.45392	3.6925	0	0	7.0448	0	7.177	1.7256	0	3.7194	0	34.807	8.9079	0	0	2.1907	0	0	0	7.7806	5.2721	0	0	0	0.20894	1.5003
0	0	0	0	0.44835	0	0	0	0	0	1.9269	0	0	0	0	0	0	0.18598	0	1.025	0	0	8.1502	0	8.5448	6.182	0	4.066	0	30.682	12.352	0	0	0	0	0	0	10.643	3.2458	0	0	0	1.7009	0
0	0	0	0	0	0	0	0.4512	0	0	1.4244	0	0	0	0	0	0	0	0	0	0	0	11.855	0	7.933	0	0	5.1204	0	33.846	7.4448	0	0	0	0	0	0	8.5484	2.4767	0	2.5979	0	0.088536	3.5664
0	0	0	0	0	0.075558	0	0	0	0	1.9216	0	0	0	0	0	0	0	0	0	0	0	6.4597	0	3.7024	0	0	4.3148	1.7238	24.421	8.4651	0	0	0	0	0	0	5.2482	1.3105	0	0	0	0	1.817
0	0	0	0	0	0	0	0.39772	0	0	1.5452	0	0	0	0	0.91733	0	2.9749	0	0	0	0	9.1669	0	0.22646	0	0	2.3316	0	27.832	6.7565	0	0	0	0.87802	0	0	6.0744	0	0	0	0	0	4.4086
0	0	0	0	0	0	0	0.38836	0	0	1.0621	0	0	1.3976	0	0	0	0	0	0	0	0	6.3841	0	0.81198	0	0	3.3232	0.29202	33.361	9.1143	0	0	0	0	0	0	2.8591	1.6781	0	0	0	0	4.8562
0	0	0	0	0	0	0	0	0	0	1.9497	0	0	1.0653	0	0	0	4.2228	0	0	0	0	4.876	0	0.68546	0	0	2.6276	0	36.519	7.2976	0	0	0	1.4722	0	0	4.045	0	0	0	0	0	4.0724
0	0	0	0	0	0	0	0.052138	0	0	1.5102	0	0	1.241	0	0	0	0	0	0	0	0	7.853	0	0.56537	0	0	2.2438	1.1631	30.582	0.40251	0	0	0	1.8792	0	0	2.855	0.55292	0	0.78111	0	0	3.3205
0	0	0	0	0	0	0	0	0	0	3.0122	0	0	0	0	0	0	2.7118	0	0	0	0	11.758	0	0.67396	0	0	3.3169	3.2641	31.368	0	0	0	0	3.344	0	0	4.7979	0	0	0	0	0	3.2801
0	0	0	0	0	0	0	0	2.0701	0	1.1319	0	0	0	0	0	0	0	0	0	0	0	15.933	0	0.51647	0	0	3.112	2.9081	28.621	1.666	0	0	0.26786	5.8465	0.10095	0	3.7545	0	0	0	0	0	4.5649
0	0	0	0	0	1.6026	0	0	1.1711	0	0.71086	0	0	0	0	0	0	2.0822	0	0	0	0	13.222	0	0.46182	0	0	2.0422	3.0385	22.29	0	0	0	0	5.5299	0.037407	0	4.7605	0	0	0	0	0	5.4997
0	0	0	0	0	0	0	0	0	0	0.96482	0	0	0.14666	0	0	0	0	0	0	1.232	0	11.815	0	0	0	0	1.795	0.38731	21.908	0	4.254	2.6922	0	6.3496	0	0	2.567	0	0	0	0	0	3.6351
0	0	0	0	0	0	0	0	0	0	3.3589	0	0	0	0	0	0	0	0	0	0.0083071	0	13.56	0	0.22927	0	0	2.6279	5.3598	17.713	3.1022	1.8947	6.5105	0	5.3431	0.9725	0	4.0413	0	0	0	0	0.42447	4.6756
0	0	0	0	0	0	0	0	0	0.29491	3.3261	0	0	0	0	0	0	0	0	0	0	0	14.089	0	2.41	0	0	1.604	3.2724	14.525	0	0	2.8091	0	3.4094	0.15759	0	3.2277	0	0	0	0	0	7.1813
0	0	0	0	0	0	0	0	0	0.059496	3.15	0	0	0	0	0	0	0	0	0	0	0	8.4033	0	2.2753	0	0	0.94923	1.9474	14.116	0	0	5.8793	0	3.595	0	0	3.7599	0	0	0	0	0	4.5685
0	0	0	0	0	0	0	0	0	0	7.0237	0	0	0	0	0	0	0	0	0	0	0	7.7922	0	2.1694	0	0	4.0299	6.6391	13.172	0	1.0725	4.5078	0	1.801	0.29275	0	3.7456	0	0	0	0	0	4.5212
0	0	0	0	0	0.43857	0	0	0.20763	0	8.1029	0	0	0.54423	0	0	0	0	0	0	0	0	10.224	0	1.1634	0	0	2.589	3.9516	9.2741	0.32395	0.3939	6.0901	0	1.4457	0.18451	0	3.8894	0	0	0	0	0	1.5331
0	0	0	0	0	0	0	0.03721	1.4437	0	7.9338	0	0	1.3814	0	0	0	0	0	0.022488	0	0	10.081	0	1.3957	0	0	4.6587	5.1186	4.4071	0	0	1.1725	0	1.9652	0	0	2.9434	0	0	0	0	0.11535	5.0545
0	0	0	0	0	0	0	0	0	0	11.213	0	0	0.1348	0	0	0	0	0	0	0	0	16.813	0	0.51684	0	0	5.8435	1.5313	11.879	2.3508	0	0.63661	0	1.8597	0	0	3.8018	0	0	0	0	0	1.878
0	0	0	0	0	0	0	0	0	0	7.8001	0	0	1.4032	0	0	0	0	0	0	0	0	13.82	0	2.8341	0	0	4.5163	0	2.5415	4.217	0	1.7313	0	1.909	0	0	1.9952	0	0	0	0	0	3.3927
0	0	0	0	0	0	0	0.87812	0	0	9.6581	0	0	0.17583	0	0	0	0.31213	0	0	0	0	15.694	0	0.5794	0	0	4.7681	1.0049	0.16734	3.4743	0	0	1.1243	0.98471	3.7608	0	3.3801	0.48183	0	0	0	0	2.9808
0	0	0	0	0	0	0	0.67442	0.051043	0	8.8659	0	0	1.6339	0	0	0	0	0	0	0	0	9.8443	0	0.29909	0	0	5.5032	6.0819	6.4535	0.018007	0	0	0	0.93754	0	0	4.854	1.6541	0	0	0	0	2.1378
0	0	0	0	0	0.69743	0	1.8288	0	0	9.6169	0	0	0.16794	0	0	0	1.0548	0	0	0	0	13.605	0	1.2724	0	0	2.6555	0	2.6434	0.74852	0	0	0.53129	0.039413	0	0	4.7091	0	0	0	0	0	1.7609
0	0.090937	0	0	0	0	0.69269	2.5625	0	0	9.2236	0	0	0	0	0	0	0.46576	0	0	0	0	9.7279	0	1.0584	0	0	4.9861	2.9983	0	0	0	0	3.2725	0.20782	0.65024	0	6.3697	0	0	0	0	0.38551	0.77375
0	0.40191	0	0	0	0	0	1.3154	0	0	9.0859	0	0	0	0	0	0	1.4596	0	0	0	0	8.6417	0	3.2321	0	0	4.8567	0	0	0.47842	0	0	0.54557	1.0277	1.1002	0	3.4267	0.043838	0	0.66678	0	0	0.67754
0	0.23282	0	0	0	0	0	1.0736	0	0	8.2809	0	0	0	0	0	0	0	0	0	0	0	6.7053	0	0.94227	0.64901	0	7.2981	0	0	0	0	0	5.2514	0	0	0	2.4051	0	0	0	0	0	1.8493
0	0	0	0	0	0	0	1.9909	0	0	8.4985	0	0	0	0	0	0	0	0	0	0	0	6.8782	0	0	0	0	6.3317	0	0	0	0	0	1.8101	0	0	0	1.3057	0	0	0	0	0.39715	1.2508
0	0	0	0	0	0	0	0	0	0	9.3421	0	0	0	0	0	0	0	0	0.59762	0	0	7.0512	0	0.82064	0	0	5.6107	2.6999	1.0642	0	0	0	0	0	0	0	3.7895	0	0	0	0	0	0.0014227
0	0	0	0	0	0	0	1.4226	0	0	8.5429	0	0	0	0	0	0	1.0299	0	0	0	0	4.0581	0	0.31075	0	0	6.4593	1.1679	0	0.8465	0	0	0	0	0.81688	0	2.7025	0	0	0	0	0	0
0	0	0	0	0	0	0	1.292	0	0	6.3339	0	0	0	0	0	0	0	0	0.024523	0	0	7.7019	0	0	0	0	6.0569	1.9311	0	0	0	0	0.41078	0	2.6204	0	1.7296	0	0	0	0	2.6975	3.0308
0	0	0	0	0	0	0	0	0	0	8.7829	0	0	0	0	1.0999	0	3.5584	0	0	0	0	4.9789	0	1.8472	0	0	7.9548	0	0	0	0	0	0	0	0	0	4.1094	0	0	0	0	0	3.4823
0	0	0	0	0	0	0	1.0575	0	0	8.5599	0	0	0	0	0	0	1.3153	0	0	0	0	6.4719	0	0	0	0	5.732	0	0	0	0	0	0	0.65398	0	0	4.5294	0	0	0	0	1.493	0.45143
0	0	0	0	0	0	0	0.79903	0	0	7.1075	0	0	0	0	0	0	0	0	0	0	0	7.0153	0	1.2013	0	0	2.8047	0.61555	0	0	0	0	0	0.51602	0.18675	0	4.0431	0	0	0	0	0.94418	0.0032741
0	0	0	0	0	0	0	0	0	0	9.0674	0	0	0	0	0	0	2.6665	0	0	0	0	5.0176	0	0	0	0	9.5883	0	0	0	0	0	0	0	0.67343	0	5.6809	0	0	0	0	0	0.19297
0	0	0	0	0	0	0	0.67856	0	0	6.1555	0	0	0	0	0	0	1.3065	0	1.0339	0	0	3.3847	0	0.14551	0	0	7.4563	0	0	0	0	0	0	0	0	0	2.1219	0	0	0	0	0.99126	2.1473
0	0	0	0	0	0	0	1.293	0	0	7.3071	0	0	0	0	0	0	0.82872	0	0	0	0	6.4086	0	0	0	0	6.3444	0	0	0	0	0	0	0	0.78996	0	3.7254	0	0	0	0	0	2.4582
0	0	0	0	0	0	0	0.29323	0	0	5.6419	0	0	0	0	0	0	1.0508	0	0	0	0	2.8861	0	0	0	0	4.4104	0	0	0	0	0	0	1.1022	0	0	3.7099	0	0	0	0	0	4.5121
0	0	0	0	0	0	0	0	0	0	5.9382	0	0	0	0	0	0	0	0	0	0	0	5.4234	0	0	0	0	5.6068	0	0	0	0	0	0	0.39888	0	0	1.5903	0	0	0	0	0	3.1531
0	0	0	0	0	0	0	0.59727	0	0	5.2508	0	0	0	0	0	0	0	0	0	0	0	3.7147	0	2.0141	0	0	5.2806	0	0	0	0	0	0	0.22758	0	0	2.3212	0	0	0	0	0.53274	2.0477
0	0	0	0	0	0.026581	0	0	0	0	5.5751	0	0	0	0	0	0	0.72298	0	0	0	0	3.5625	0	1.3028	0	0	4.0922	0	0	0	0	0	0	1.0928	0	0	0.89724	0	0	0	0	0	1.2233
0	0	0	0	0	0	0	0	0	0	4.8096	0	0	0	0	0	0	0	0	0	0	0	4.6444	0	2.3875	0	0	6.6341	0	0	2.3468	0	0	0	0	0	0	3.3874	0	0	0	0	0	0
0	0	0	0	0	0	0	0	0	0	4.8355	0	0	0	0	0	0	0.92807	0	0.24523	0	0	4.1423	0	0.83308	0	0	3.748	0	0	0	0	0	0	0	0	0	2.6053	0	0	0	0	0	1.747
0	0	0	0	0	0	0	0	0	0	4.5179	0	0	0	0	0	0	1.273	0	1.3907	0	0	5.3435	0	1.4926	0	0	5.0141	3.8687	0	0	0	0	0	0	0	0	0.16503	0	0	0	0	0	2.8176
0	0	0	0	0	0	0	1.0093	0	0	6.1114	0	0	0	0	0	0	2.4006	0	0	0	0	6.1949	0	3.6006	0	0	6.7815	2.4806	0	2.7827	0	0	0	0	0	0	2.3633	1.051	0	0	0	0	1.1813
0	0	0	0	0.27517	0	0	0	0	0	2.6211	0	0	0	0	0.60769	0	1.6633	0	0	0	0	6.4472	0	1.1308	0	0	5.5658	0	0	1.2225	0	0	0	0	0	0	0.18207	0	0	0	0	0	0.22538
0	0	0	0	0	0	0	0	0	0	4.7095	0	0	0	0	0	0	4.8022	0	0	0	0	10.217	0	0.56953	0	0	2.6177	0	0	0.46341	0	0	0.80753	0	0	0	0.19262	0.91527	0	0	0	0	0
0	0	0	0	0	0	0	0	0	0	4.3277	0	0	0	0	0	0	2.1449	0	0	0	0	5.7475	0	2.246	0	0	2.2379	0	0	3.2554	0	0.0354	0	0	0	0	0	0	0	0	0	0	1.6915
0	0	0	0	0	0	0	0	0	0	2.8622	0	0	0	0	0	0	0	0	0	0	0	6.7633	0	1.8534	0	0	2.0016	0	0	2.2652	0	8.5736	0.11865	0	0	0	1.8571	0	0	0	0	0	3.5532
0	0	0	0	0	0.83512	0	0	0	0	3.5763	0	0	0	0	0	0	5.5822	0	0	0	0	8.8642	0	0	0	0	4.255	1.76	0	2.9881	0	9.67	0	0	0	0	0	0	0	0	0	0	3.4142
0	0	0	0	0	0	0	0	0	0	1.3085	0	0	0	0	0	0	2.3315	0	0	0	0	9.5257	0	1.7213	0	0	3.6267	0	0	7.5145	0	12.701	0	0	0	0	0.27863	0	0	0	0	0.76623	3.7029
0	0	0	0	0	0	0	0	0	0	4.8127	0	0	0	0	0	0	1.84	0	1.3015	0	0	6.4611	0	7.4972	0	0	4.391	0	0.39468	11.486	0	10.282	0	0	0	0	0.772	0	0	0	0	2.9478	4.0539
0	0	0	0	0	0	0	0	0	0	4.9019	0	0	0	0	0	0	1.4291	0	0	0	0	11.086	0	3.7615	1.8337	0	4.7701	0	0	8.3974	0	11.138	0	0	0	0	0	0	0	0	0	0	1.0814
0.074589	0	0	0	0	0	0	0	0	0	4.3921	0	0	0	0	0	0	0.55065	0	0	0	0	7.3886	0	0.79203	0	0	3.4938	0	0	10.783	0	16.039	0	0	0	0	0	0	0	0	0	0	2.1469
0.82453	0	0	0	0	0	0	0	0	0	4.363	0	0	0	0	0	0	3.321	0	0	0	0	10.907	0	1.2007	0	0	4.1881	0	0	12.816	0	15.662	0	0	0	0	0	0	0	0	0	0	4.2383
0.11773	0	0	0	0	0	0	0	0	0	2.1992	0	0	0	0	0	0	0	0	0	0	0	10.586	0	8.0107	0	0	5.7028	0	0	17.658	0	14.611	0	0	0	0	0.43884	0	0	0.44644	0	0	3.7686
0	0	0	0	0	0	0	0	0	0	3.2803	0	0	0	0	0	0	1.6992	0	0	0	0	9.2779	0	6.9512	0	0	7.0332	0	0.067512	17.443	0	13.037	0	0	0	0	0	0	0	8.0379	0	5.2835	3.3004
0	0	0	0	1.3047	0	0	0	0	0	2.0219	0	0	0	0	0	0	1.9951	0	0	0	0	8.8607	0	6.11	0	0	6.8301	0	0	19.018	0	9.2054	0	0	0	0	3.0251	0	0	11.218	0	3.0639	5.3183
0	0	0	0	0	0.8304	0	0	0	0	1.4106	0	0	0	0	0	0	2.4152	0	0	0	0	12.137	0	7.9922	0	0	5.582	0	0	20.85	0	9.4811	0	0	0	0	4.4065	0	0	9.7276	0	0.95688	2.4252
0	0	0	0	0.65227	0	0	0	0	0	1.7515	0	0	0	0	0	0	1.6825	0	2.8924	0	0	11.896	0	11.755	0	0	2.9838	0	4.1714	19.092	0	10.358	1.8099	0	0	0	3.3094	0	0	7.488	0	2.6108	3.3089
0.035419	0	0	0	0	0	0.25708	0	0	0	2.7725	0	0	0	0	1.1679	0.2043	0	0	0.13701	0	0	9.1887	0	3.1216	1.5284	0	5.1343	0	0	16.297	0	17.533	0.26247	0	0	0	2.1573	1.7353	0	6.6833	0	0.52811	2.9826
0	0	0	0	0	0.052074	0	0	0	0	1.2251	0.3658	0	0	0	0	0	0	0	0	0	0	8.3748	0	4.7756	0	0	2.4432	0	0	12.562	0	24.419	0	0	0	0	0	0	0	5.8779	0	0.59491	4.9421
0	0	0	0	0	0	0	0	0	0	0.67279	0	0	0	0	0	0.39493	0	0	0	0	0	9.5126	0	1.1543	0	0	2.5386	1.2796	0	16.117	0	24.274	0	0	0	0	0	0	0	3.5688	0	0	3.409
0	0	0	0	0	0	2.4526	0	0	0	0	0	0	0	0	0	0	2.6005	0	0	0	0	6.425	0	2.8676	0	0	1.9329	0	0	16.272	0	23.348	2.9607	0	0	0	0	2.4192	0	1.5801	0	0.39664	0.58846
0	0	0	0	0	0	0	0	0	0	0	0	0	0	0	0.059952	0	3.1846	0	0.97853	0.70587	0	8.1001	0	4.3513	0	0	1.8591	0	0	13.195	0	18.394	0	0	0	0	1.0675	6.7574	0	1.7895	0	0	2.9931
0	0	0	0	0	0	0.20926	0	0	0	0.1836	0	0	0	0	0	0	5.8161	0	0	2.6008	0	4.0425	0	9.2376	0	0	2.2988	0	5.6074	12.808	0	19.067	0	0	0	0	2.1515	4.2673	0	3.4624	0	3.1164	1.8285
0	0	0	0	1.692	0	0	0	0	0	0	0	0	0	0	1.7457	0	5.02	0	0	2.233	0	5.4769	0	8.9534	0.77295	0	2.7345	0	1.9461	13.564	0	29.846	0	0	0	0	3.4071	2.1568	0	4.0736	0	3.5122	2.5915
0	0	0	0	1.4301	1.1858	0.96876	0	0	0	0	0	0	0	0	0	0	4.342	0	0	2.4503	0	6.2067	0	8.3816	0	0	3.6333	0	7.1388	13.472	0	41.898	0	0	0	0	6.7363	2.6554	0	5.2193	0	3.9309	3.6903
0	0	0	0	0.24623	0	0.32903	0	0	0	0	0	0	0	0	0	0	6.2141	0	0	1.499	0	8.9055	0	7.4014	2.6804	0	1.6161	0	0	15.354	0	46.02	0	0	0	0	3.3629	7.8362	0	3.1246	0	2.417	4.9385
0	0	0	0	0	0.029508	1.5541	0	0	0	1.2611	0	0	0	0.025456	1.3991	0	6.1111	0	0	0	0	3.523	0	4.032	0	0	0	0	1.2226	7.1389	0	45.127	0	0	0	0	1.8188	3.6411	0	0	0	0	4.7404
0	0	0	0	0	0	2.4374	0	2.4472	0	0	0	0	0	0	0	0.1809	2.5497	0	0	0	0	12.398	0	2.1252	0	0	2.718	0	0.44373	9.5254	0	47.593	0	2.9519	0	0	1.456	4.9603	0	0	0	0	3.2779
0	0	0	0	0	0	0.29437	0	1.0776	0	0.21155	0	0	0	0	1.4691	0	4.4941	0	0	0	0	11.95	0	0.82879	0	0	0.054566	0	0	9.1128	0	46.419	0	2.8597	0	0	2.4543	4.6686	0	0.054424	0	0	3.6034
0	0	0	0	0	0	0	0	0	0	0	0	0	0	0.99088	0.051744	0	1.4055	0	0	0	0	11.021	0	5.4718	0	0	0.26368	0	2.9538	8.1339	0	44.107	0	0.74615	0	0	3.9067	5.5978	0	0.30328	0	0	3.8167
0	0	0	0	0	0	0.83911	0	0	0	0.13932	0	0	0	0	0.68137	0	3.6673	0	0	0	0	5.3538	0	3.6118	0	0	0.049665	0	0	13.497	0	41.78	0.73518	0.99173	0	0	3.6817	4.8927	0	1.4243	0	0.73043	5.4355
0	0	0	0	0	1.1963	1.0014	0	0	0	0	0.23133	0	0	0	1.7894	0	4.8954	0	0	0	0	8.2834	0	4.3808	0	0	1.9777	0	0.87583	14.11	0	38.725	0.97605	0.25186	0	0	3.9598	1.9672	0	1.8807	0	0	2.3904
0	0	0	0	0	0	0	0	0.53099	0	0	0	0	0	0	0	0	0.83968	0	1.1353	0	0	3.725	0	8.2745	0	0	3.9163	0	4.7186	19.719	0	32.022	1.0915	0	0	0	5.8422	4.9329	0	3.7299	0	1.5643	1.9015
0	0	0	0	0	0.38632	2.3939	0	0	0	1.3061	0	0	0	0	0	0	1.3576	0	1.0321	0	0	0	0	10.7	0	0	5.2904	0	2.1517	18.41	0	31.085	0	0	0	0	9.477	0	0	4.01	0	0.83602	3.2891
0	0	0	0	0	1.1613	0	0	0	0	0.10334	0	0	0	0	0	0	0.79079	0	0	0	0	0.089309	0	9.436	0	0	2.3329	0	0.27582	19.564	0	29.205	0	0	0	0	9.1299	0	0	3.5125	0	0	3.1782
0.10842	0	0	0	0	0	1.3343	0	0	0	0.70684	0	0	0	0	0	0	2.2259	0	0	0	0	1.9525	0	7.0466	0	0	0.90809	0	1.1762	18.994	0	24.155	0	0	0	0	8.8948	0	0	3.8001	0	0	3.3323
0	0	0	0	0	0	0	0	0	0	3.6676	0	0	0	0	0	0	1.5707	0	0	0	0	1.6462	0	11.136	4.4914	0	3.2114	0	2.5326	23.361	0	24.504	0	0	0	0	6.5209	0	0	5.3829	0	0.34908	2.7067
0	0	0	0	0	0	0	0	0	0	0.93674	0	0	0	0	0	0	4.9628	0	0.66058	0	0	0	0	8.7443	0	0	0.66382	0	2.7521	18.384	0	22.044	0	0	0	0	7.0151	0	0	3.1127	0	0	3.3803
0	0	0	0	0	0	0	0	0	0	0	1.2802	0	0	0	0.49281	0.43333	3.0175	0	0	0	0	0.23115	0	6.5274	0	0	1.7876	1.2567	4.6392	23.643	0	15.811	0	0	0	0	5.4894	1.6275	0	0	0	0.38703	3.8475
0	0	0	0	0	0	0	0	0.46873	0	0	0.31692	0	0	1.7989	0	0	0.93422	0	0	0	0	0	0	0.97985	0	0	0	1.8238	0	17.14	0	20.512	0	0.4076	0	0	2.804	2.0221	0	0.58066	0	0	3.59
0	0	0	0	0	0	1.2638	0	1.7032	0	0	0	0	0	0.28256	0.056741	0	0	0	0	0	0	0	0	2.3557	0	0	0	3.5761	0	15.15	0	19.279	0	0.80641	0	0	3.2916	0	0	0	0	0	3.9759
0	0	0	0	0	0.10959	2.5552	0	0.69667	0	0.45103	0	0	0	0	0	0	0.39191	0	0	0	0	0	0	4.1429	0	0	0.97035	0	0	15.468	0	17.523	0	0.2036	0	0	3.1953	0	0	1.7153	0	2.5615	2.8697
0	0	0	0	0	0.59167	1.2031	0	1.862	0	0	0	0	0	0	1.184	0	0	0	0	0	0	0	0	5.1434	0	0	0	0.88896	0.88018	13.999	0	20.102	0	0	0	0	3.7311	0	0	0.23702	0	0.22513	2.5851
0	0	0	0	0	0	0	0	3.5626	0	0	0.80826	0	0	0	0	0.025816	0	0	0	0	0	0	0	0	0	0	1.0271	1.0016	0	10.221	0	21.429	0	2.4502	0	0	1.1222	2.9953	0	0	0	3.3662	6.2953
0	0	0	0	0	0.56051	0	0	0.91747	1.4834	0	0.63541	0	0	0	0	0	0	0.078406	0	0	0	0.23519	0	0.86553	0	0	0	0	0	14.51	0	20.103	0	0.69219	0	0	0	0	0	0	0	2.5043	1.7329
0	0	0	0	0	0	0	0	2.344	3.5102	0	1.8336	0	0	0.014179	0.87937	0.054142	0	0	0	0	0	0	0	1.3791	0	0	0	0.099903	0	8.051	0	19.848	0	2.1461	0	0	1.347	0	0	0	0	4.2747	2.4274
0	0	0.12034	0	0	0.30461	3.2224	0	2.7202	4.4313	0	0	0	0	0	0.87221	0	0	0	0.07496	0	0	0	0	1.4736	0	0	0	0	0.70108	17.178	0	19.57	0	0.59618	0	0	1.8072	0	0	0	0	2.9638	3.9163
0	0	0	0	0	0	0	0	0	2.9218	0	0	0	0	0	0	0.28124	0	0	1.8294	0	0	0	0	5.2835	0	0	0	0	3.0953	14.456	0	15.547	0	0	0	0	2.2129	0	0	3.6993	0	3.0084	4.4296
0	0	0	0	0	0	2.9546	0	0	4.2838	0.65809	0	0	0	0	0	0	1.2204	0	0.57072	0	0	0	0	2.7556	0	0	2.628	0	7.04	16.304	0	11.003	0	0	0	0	5.4824	0	0	1.8391	0	4.7973	5.8662
0	0	0	0	0	0	0.066244	0	2.3509	10.102	1.2196	0	0	0	0	0	0	0	0	0.66148	1.6456	0	0	0	1.413	0	1.4863	0.44344	3.752	5.2178	12.743	0.98731	16.855	0	1.8964	0	0	6.8235	0	0	1.7971	0	8.6415	6.048
0	0	0	0	0	0	1.4595	0.37533	1.4455	23.024	0.75314	0	0	0	0	0	0	0	0	3.4394	6.8777	0	0	0	0	0	5.8137	1.8232	1.1463	4.4737	17.975	0	19.285	0	8.7667	0	0	8.3055	0.15205	0	1.8406	2.8625	11.977	7.9405
0	0	0	0	0	0	3.1296	0.39497	0	26.641	0	1.7201	0	0	0	0	0.91026	0	1.582	3.543	16.587	0	1.902	0	0	0	7.6262	1.0286	4.865	7.426	14.682	2.0178	18.161	0	18.777	3.4945	0	11.492	8.6258	0	0	4.7322	19.735	13.757
0	0	0	0	0	0	4.5173	0	0	36.745	0.42569	0	0	0	0	1.4272	0	0	6.0047	3.5677	23.91	0	0	0	2.0852	0	9.5769	0	5.864	18.266	12.154	4.2381	26.127	1.6844	25.037	3.1194	0	13.914	15.711	0	1.8389	10.251	29.054	14.225
0	0	0	0	0	0	6.9041	0	0	38.221	2.7817	1.2583	0.095794	0	0	0	0.33019	0	6.5687	6.6448	29.921	0	0	0	3.2624	0	14.259	0.68899	6.4051	33	10.805	6.2102	25.817	1.9948	26.595	6.7992	1.5126	16.793	20.457	0	4.5131	19.663	25.221	21.789
0	0	0	0	0	2.8882	6.6404	0.52317	0	38.163	2.031	0.33171	0.41908	0	0	0	0	0	9.0116	6.1622	31.103	0	0	0	7.092	0	16.248	2.5713	4.1623	50.771	16.343	9.9669	34.113	3.1526	25.542	8.86	5.7509	18.084	25.725	0	6.2234	22.421	24.931	22.995
0	0	0	0	0.37272	4.3851	8.4917	0	0	37.388	2.1411	1.0846	0	0	0	0	0.1102	1.5234	13.383	8.3746	34.113	0	0	0	6.1498	0	18.322	2.427	3.9799	57.442	17.647	15.529	45.654	4.1555	28.243	8.9772	8.9181	19.884	22.485	0	8.6334	28.537	26.876	27.037
0	0	0	0	0	6.3722	11.156	0	0	33.585	1.9365	2.5006	0.13493	0	0	0	1.6521	0	13.146	10.628	34.658	0	4.5875	0	4.6976	4.4771	18.586	2.4536	7.4026	64.984	16.734	14.453	57.341	2.7147	31.711	10.648	6.933	17.678	22.014	0	10.64	33.11	25.17	28.811
0	0	0	0	0	4.8583	8.3116	0	0	30.928	2.4037	3.3291	0.33239	0	0	0	0.72947	0.71148	14.07	12.423	37.706	0	7.0786	0	5.9418	0	19.572	4.2804	8.0786	72.571	12.591	20.721	62.64	5.8298	32.544	11.778	7.6498	19.33	22.51	0	8.713	27.761	28.814	31.463
0	0	0	0	0	3.9883	10.579	0	0	27.437	4.7061	4.3222	1.4887	0	0	0	0.95162	0.17197	15.703	11.536	39.06	0	6.9218	0	5.3997	5.1374	19.056	3.3788	1.8958	72.015	13.264	33.656	59.291	7.3705	34.107	12.659	7.1701	20.965	21.891	0	11.63	30.517	27.748	27.377
0	0	0	0	0	4.6819	9.9085	0	0	24.676	6.6194	3.7007	1.9659	0	0	0	1.8623	0	20.913	9.4594	39.531	0	8.2624	0	5.311	7.8744	20.747	3.1084	7.1858	73.104	14.266	29.34	55.787	7.7834	36.633	16.991	8.5633	21.472	21.375	0	10.908	34.928	25.033	28.127
0	0	0	0	0	7.1377	13.522	0	0	22.549	9.4545	3.3753	1.912	0	0	0	0.55874	0	19.973	7.23	35.845	0	9.2236	0	0	3.9305	18.506	2.3074	7.0059	66.915	17.681	28.736	59.241	9.6634	39.033	10.095	8.7378	16.028	23.676	0	8.5727	34.53	22.661	24.952
0	0	0	0	0	7.201	10.62	0	0	19.629	4.0434	3.1818	2.4134	0	0	0	1.3098	0	18.764	4.827	35.414	0	7.6971	0	0	7.4921	17.529	0.81174	5.5193	78.928	16.882	28.8	56.26	10.939	40.468	14.045	5.4427	17.77	20.925	0	6.8661	35	26.18	27.014
0	0	0	0	0	3.8837	9.3233	0	0	17.528	5.2625	2.6012	2.2368	0	0	0	0.37528	1.5962	16.762	8.1767	35.213	0	7.3159	0	0	11.361	17.857	3.8812	6.0942	74.251	18.756	24.39	53.984	11.224	36.148	10.642	6.0923	22.234	17.167	0	9.0347	33.068	24.236	24.12
0	0	0	0	0	5.3747	6.0726	0	0	14.557	4.9533	2.2709	1.5955	0	0	0	0	0	16.429	5.5149	32.569	0	3.9263	0	0.77804	7.9297	16.283	0	5.4362	74.33	20.962	24.64	52.251	8.1237	31.879	9.3004	3.2474	22.666	14.81	0	6.6719	33.058	20.249	21.268
0	0	0	0	0	5.3494	6.3179	0	0	13.331	4.189	2.1445	1.7572	0	0	0	0	0	13.537	6.0687	28.346	0	4.287	0	0.43271	2.2524	14.192	1.1242	1.887	60.853	15.774	19.16	47.467	9.9202	33.402	7.8225	1.6103	24.145	9.5935	0	5.2157	21.413	20.714	19.718
0	0	0	0	0	4.4487	4.4743	0	0	12.854	2.1241	3.3758	1.7584	0	0	0	0	0	13.303	6.5986	23.209	0	0.69523	0	0	1.827	13.619	1.6992	5.0252	55.224	17.848	15.844	45.301	12.078	32.477	8.8671	0	23.277	6.8595	0	4.8872	24.018	18.799	17.435
0	0	0	0	0	4.1801	4.2965	0	0	10.783	1.889	1.9265	1.5508	0	0	0	0	0	11.424	5.743	22.034	0	3.128	0	0	4.3542	12.075	0	5.8867	61.584	14.685	13.198	38.742	7.1402	29.175	5.9347	0	24.893	10.752	0	4.9287	22.087	19.398	15.873
0	0	0	0	0	4.0533	5.8567	0	0	9.7794	0.82002	1.0815	0.77861	0	0	0	0	0.96094	11.303	6.7773	22.189	0	0	0	1.4494	2.7515	11.263	1.3772	5.8654	68.959	19.61	14.855	36.857	7.621	23.301	5.9307	0	25.585	2.8639	0	6.1933	19.187	17.789	12.348
0	0	0	0	0	1.44	5.4326	0	0	6.7533	2.2214	0.81343	0.97109	0	0	0	0.043266	0	11.589	6.9633	21.236	0	0	0	1.9159	6.1871	9.8912	4.9051	3.6977	64.401	22.332	9.8854	36.294	6.1579	23.042	1.3605	0	26.596	1.3855	0	7.1853	16.674	15.965	13.334
0	0	0	0	0	4.3914	3.5235	0	0	6.5666	1.0713	1.2245	1.1693	0	0	0	0	0.98346	12.284	5.6625	18.409	0	0	0	0	4.9737	7.1646	3.2446	5.3789	66.192	19.966	10.381	36.257	6.776	21.565	2.3755	0	23.373	5.0245	0	3.3967	10.947	9.0553	12.092
0	0	0	0	0	1.6521	5.7226	0	0	4.9243	2.6031	1.1791	0.70341	0	0	0	0	0	9.536	3.133	17.291	0	0	0	3.8484	2.2771	6.2492	1.5341	5.7626	62.528	18.266	6.7474	32.887	7.3481	17.913	0.74145	1.5732	22.697	0.58056	0	5.3028	11.598	10.515	10.526
0	0	0	0	0	1.7507	3.3422	0	1.5539	4.2847	1.7555	1.133	0.35096	0	0	0	0	0	8.2984	4.1381	13.702	0	0	0	0.89034	2.6695	4.8337	1.1205	2.8528	59.597	10.392	7.5443	31.754	5.0404	18.386	0.70125	0	22.845	1.463	0	5.6245	8.6467	10.525	8.2442
0	0	0	0	0	0.56315	4.1986	0	0	4.1503	0.6539	0.58505	0.4992	0	0	0	0	0.91327	8.6724	4.8481	13.087	0	0	0	3.8518	0.24131	6.0195	4.38	3.7065	63.916	16.943	4.9165	29.331	5.6068	16	0.67458	0	26.862	1.3757	0	4.7901	9.9647	9.2095	8.5755
0	0	0	0	0	0.57783	3.8246	0	0	2.3657	0.036896	0.47917	0.75614	0	0	0	0	2.3312	8.2486	7.289	12.753	0	0	0	3.9541	2.4794	6.2917	5.5364	0	72.563	12.935	5.3662	23.416	3.3694	13.142	0	0	29.85	3.6497	0	4.7661	9.8016	8.2631	7.213
0	0	0	0	0	0.57294	3.8549	0	0	3.0433	0.64511	0	0.45207	0	0	0	0	0	6.2647	5.3738	14.274	0	0	0	5.9564	2.526	4.799	5.1575	0.83644	73.632	17.955	4.7473	22.881	6.8192	11.831	0	0	28.529	5.0537	0	7.244	4.8767	9.3434	9.5913
0	0	0	0.28043	0	0.4142	3.2847	0	0	1.8288	1.5957	0	0.2012	0	0	0	0.30035	2.3545	9.1984	8.1953	11.786	0	0	0	7.3865	1.9247	3.4128	6.9353	0.3243	73.957	19.447	7.2361	18.131	3.6771	9.5657	0	0	30.418	0.8738	0	6.8644	5.5127	5.6859	7.8684
0	0	0	0.078434	0	0	2.1802	0	0	1.214	0.015621	0	0.3707	0	0	0	0	0	8.7082	5.9114	11.18	0	0	0	6.5268	6.7669	3.5169	6.3858	0	77.967	19.832	1.2193	17.968	6.0812	10.04	0	0	31.084	0	0	4.3556	2.7031	6.5489	9.9376
0	0	0	0	0	1.3728	2.1489	0	0	0.7661	0.16722	0	0	0	0	0	0	0.7551	7.7368	6.8095	8.1407	0	0	0	7.2921	8.2989	2.0289	7.1765	0.091449	73.658	19.146	0.52946	20.388	7.5892	7.8542	0	0	30.607	0	0	4.1894	1.1533	7.3132	8.4647
0	0	0	0	0	1.3098	1.4811	0	0	0.87465	0.11124	0	0	0	0	0	0	0	8.6361	4.9303	7.9378	0	0	0	6.1567	0.098114	1.6092	5.1086	1.4384	78.609	17.546	1.5838	14.585	4.3264	7.8041	0	0	31.975	3.3747	0	4.1365	0.77712	6.1679	6.6165
0	0	0	0	0.147	0	1.8817	0	0	0.34547	1.62	0	0.064934	0	0	0	0	0	5.6062	3.946	6.7823	0	0	0	9.6365	2.9288	2.6277	6.0682	0	74.92	15.09	0.83043	17.334	5.1678	7.8686	0	0	34.66	0	0	7.9084	0	4.7309	5.9978
0	0	0	0	0	3.2564	0.60928	0	0	0	1.5583	0	0.33632	0	0	0	0	1.8382	7.3096	3.96	7.7716	0	0	0	4.8695	10.65	2.4441	5.9999	1.6241	78.756	11.974	3.0436	11.956	5.3918	7.1628	0	0	35.404	0	0	3.809	0	4.3372	4.4423
0.24973	0	0	0	0	0.51565	4.0475	0.20574	0	0.52331	3.1211	0	0.015438	0	0	0	0	1.0105	6.1821	5.7135	7.6088	0	0	0	5.8433	0	3.6656	4.4486	0	73.472	19.994	0	15.375	5.1749	7.0251	0	0	37.324	0.60722	0	1.9783	0	5.09	7.204
0	0	0	0	0	0	1.1116	0	0	0	1.6802	0	0	0	0	0	0	0	6.5192	3.396	6.6693	0	0	0	6.5467	1.8558	2.3015	5.0603	0.76771	75.826	18.804	2.8454	17.517	0.13888	7.1394	0	0	40.163	0	0	2.5182	0	3.8594	7.0564
0	0	0	0	0	1.1451	0	0	0	0	1.5155	0	0.23766	0	0	0	0	0.53207	4.2711	4.4424	6.3308	0	0	0	4.9227	2.0205	3.2893	6.332	2.6613	74.59	13.549	0	17.97	2.1597	6.3461	0	0	39.097	0	0	4.8752	0	1.1531	7.7732
0	0	0	0	0	0	0.77697	0	0	0	0.73241	0	0.81489	0	0	0	0.031553	0	4.0412	5.8854	6.5472	0	0	0	1.3929	1.2163	3.4646	3.1949	0.50412	71.904	19.223	1.9409	19.309	1.935	10.346	0	0	37.995	0	0	3.297	0	4.4149	6.8699
0	0	0	0	0	0	3.4692	0	0	0	0	0.39835	1.4468	0	0	0	0	0	3.1492	6.5012	7.8053	0	0	0.32315	2.3115	2.1625	5.4326	2.9458	4.003	68.065	15.719	3.511	18.895	0	8.8539	0	0	35.026	0	0	5.4709	1.1578	5.2877	6.1129
0	0	0	0	0	0	0.57265	0	0	0	1.1714	0	2.6971	0	0	0	0	2.3312	4.7058	2.4057	9.9997	0	0	0	5.6138	2.9129	9.7393	6.8503	4.2489	62.109	12.496	1.1564	18.651	2.1133	8.9613	0	0	38.48	0.12441	0.16623	5.2706	9.2325	1.1097	10.735
0	0	0	0	0	0.47716	2.5605	0	0	0	0.65413	0	3.2262	0	0	0	0	4.0071	3.6855	1.8915	10.061	0	0	0	3.6795	7.6666	11.184	7.7719	0	63.384	11.029	5.3405	26.877	0	9.9438	0	0	41.617	5.3697	0	3.7782	13.51	1.942	9.6399
0	0	0	0	0	0.18005	1.6822	0	0	0	0.47384	0.14112	3.5778	0	0	0	0	2.4994	3.028	8.163	11.75	0	1.8265	0	3.9376	8.8356	13.103	7.0966	3.5407	66.356	14.37	6.4523	27.761	1.1389	10.81	0.044361	2.3953	42.786	4.4987	0.82236	7.9545	14.675	3.3392	12.403
0.12155	0	0	0	0	0	2.1671	0	0	0	3.0596	0.96305	3.6835	0	0	0	0	0	6.6424	5.2162	11.874	0	2.3515	0	6.5648	0	11.831	5.6344	1.5325	68.334	9.4991	3.778	28.105	0.84016	12.68	1.8954	1.09	39.534	3.4062	1.6453	5.4076	15.486	3.8299	10.109
0	0	0	0	0	0	3.0165	0	0	0	1.9357	1.8026	3.2622	0	0	0	0	0	5.197	5.1571	11.969	0	1.7232	0	5.5114	5.6259	11.785	6.0735	6.2339	79.888	10.053	3.3412	25.43	1.2884	13.828	4.8908	1.6395	38.085	0	0.5939	8.111	17.738	1.7663	6.9037
0	0	0	0	0	0	2.7046	0	0	0	1.7543	0.42455	2.9239	0	0	0	0	0	6.6776	6.6796	10.432	0	2.3618	0	4.1812	2.7684	10.153	5.6801	2.6309	75.141	6.8191	4.6121	27.531	0.59421	11.786	0.34098	2.7623	36.924	0	0.50888	7.6191	19.506	4.8259	6.0674
0	0	0	0	0	0	1.7224	0	0	0	4.0301	0.11067	3.0632	0	0	0	0	0	7.4199	6.8981	8.9445	0	3.9517	0	3.7811	6.9156	10.365	1.1034	7.6852	72.818	9.8681	0.45443	25.306	2.3148	11.244	0	0.012099	38.005	0	0.127	8.0197	12.331	5.0458	11.007
0	0	0	0	0	0	2.2896	0	0	0	1.3971	0.86195	3.3679	0	0	0	0	0.84073	7.4877	4.3132	6.6782	0	0	0	1.6867	0.070934	8.3766	1.2291	1.9556	58.462	11.801	0	23.916	0.4355	11.833	0.57307	0	36.165	0	0.24152	4.3587	12.773	1.7514	10.619
0.035144	0	0	0	0	0.20489	0.805	0	0	0	4.867	0	3.0226	0	0	0	0	0	6.4611	5.9898	6.6338	0	0	0	1.4645	0.97124	8.8585	3.2709	1.3427	58.567	13.245	0	20.161	2.1759	12.396	0.54512	0	36.222	0.27251	0	4.7812	10.749	2.0204	8.684
0	0	0	0	0	0.65551	2.0316	0	0	0	2.2124	0.81662	2.9747	0	0	0	0	5.2199	5.4989	3.1803	5.8351	0	0.36087	0	0	3.7957	7.7093	5.2479	0	51.382	10.416	0	20.725	2.1922	10.074	0	0	35.713	1.7294	0.93269	2.1232	11.002	3.1412	8.0076
0	0	0	0	0	0	0.76697	0	0	0	3.4237	0	2.8668	0	1.0021	0	0	0	3.6755	2.4715	7.8688	0	0	0	1.4329	2.8424	6.4471	1.6852	2.9602	52.102	10.886	0	14.844	1.2137	7.374	5.2418	0	36.792	0	0.22894	4.8425	7.7038	1.9459	5.4393
0	0	0	0	0	0	1.3211	0	0	0	1.8055	0	2.4511	0	0	0	0	0	5.9386	2.4182	7.1907	0	0	0	1.2381	0.48527	6.8047	0	3.8014	51.493	2.8567	0.89161	15.149	0	8.62	2.2695	0	34.275	0	0	7.8108	7.2722	2.0007	5.1158
0	0	0	0	0	0	0.87312	0	0.38333	0	2.8788	0	2.6344	0	0	0	0	0	6.2795	7.3424	5.2922	0	0	0	2.4926	0.4614	6.2612	0.40702	4.2814	40.426	10.156	0	12.932	0	9.5503	0	0	36.035	0	1.0475	6.2882	6.3218	3.4311	9.7628
0	0	0	0	0	0	0	0	0	0	2.1673	0	2.7111	0	0	0	0	0	3.7939	4.2618	2.8485	0	0	0	0	0	5.9986	1.1232	1.8112	37.032	3.1099	0	14.636	2.78	6.6529	0	0	34.648	0	3.2919	3.588	1.352	1.2157	6.9786
0	0	0	0	0	0.42656	0	0	0	0	2.3471	0	2.9907	0	0	0	0	0	5.1244	4.9475	1.9429	0	0	0	0	0	3.3477	0.44695	0	32.89	5.4756	0	16.257	0	9.5761	0	0	34.812	0	3.6107	4.6948	0.42981	1.8782	4.4519
0	0	0	0	0	0	1.2103	0	0	0	3.2649	0	2.3834	0	0	0	0	0	1.8317	1.7019	0.8843	0	0	0	0.18879	1.4288	3.2385	1.2701	2.7813	26.83	10.223	0	13.499	0	7.8082	0	0	32.904	0	3.671	2.3394	0	4.0858	4.7885
0	0	0	0	0	0	1.3962	0	0	0	1.397	0	2.3777	0	0	0	0	0	2.3932	4.6404	2.3583	0	0	0	1.7719	7.2011	2.8766	0.79224	1.2749	32.685	6.9472	0	12.662	0	7.2179	0	0	37.254	0	4.3883	2.8542	0	0	5.3853
0	0	0	0	0	0	1.6374	0	0	0	2.4382	0	2.6351	0	0	0	0	0	3.1628	3.5528	3.6563	0	0	0	1.1554	6.5627	3.6803	0.31498	1.9681	33.353	7.6023	0.3615	12.618	0	7.8826	0.25854	0	38.871	0	3.033	2.1958	0	1.2378	8.871
0.050153	0	0	0	0	0	0	0	1.8206	0	4.9518	0.17181	2.3196	0	0	0.3176	0	0	2.0617	5.1342	2.5713	0	0	0	0.040473	0	2.8496	0.50977	1.6892	24.948	6.428	0	9.8003	0	9.1289	1.6992	0	33.544	0	0.57863	3.9684	0	4.2219	5.6302
0	0	0	0	0	0	0	0	0	0	1.8823	0	2.5311	0	0	0	0	0	1.4264	6.0634	2.0997	0	0	0	0	0.12994	3.0877	0	3.0903	27.58	4.2273	0	12.323	0	8.1082	0	0	32.603	0	1.5431	3.8286	0	0	4.9577
0	0	0	0	0	0.54907	0	0	0	0	2.5345	0	1.7362	0	0	0	0	0	3.2867	6.5831	0.16337	0	0	0	2.1024	1.5929	4.3038	0	0.48107	22.567	4.7189	0	12.716	0.18741	7.5612	0	0	32.683	0	1.9546	2.1442	0	3.9746	6.8882
0	0	0	0	0	0	0.63677	0	2.1294	0	2.0919	0	2.0206	0	0	0	0	0	2.3668	4.9927	0	0	0	0	1.5519	0	5.7521	0	0.53179	17.841	1.3184	0	8.8289	0	8.1379	0	0	33.285	0	1.4074	4.4538	0	0	5.5512
0	0	0	0	0	0	0	0	0	0	4.2101	0.51839	1.9236	0	0	0	0	0	2.2708	8.4117	0	0	0	0	0	0	4.6092	0	0.067473	19.063	2.2758	0	5.9033	0	8.7844	0	0	30.069	0	1.6235	0	0	3.4466	3.8354
0	0	0	0	0	0	0.18777	0.59269	0.73409	0	2.2281	0	1.7189	0	0	0	0	0	1.9319	3.5023	0	0	0	0	0	0.35334	4.4547	0	1.3652	22.58	2.6045	0	5.2829	0	6.9852	0	0	31.532	0	3.5078	4.1593	0	0	3.8772
0.16393	0	0	0	0	0.069772	1.2948	1.3038	0.56127	0	3.4547	0	1.4703	0	0	0	0	0	1.6707	3.9937	0	0	0	0	0	0	3.2357	0	6.8785	13.331	0	0	6.6046	0	6.8194	2.5694	0	30.416	0	2.5626	3.5294	0	0	6.2058
0	0	0	0	0	0.75328	0	0.6174	0	0	3.8285	0	1.9806	0	0	0	0	0	3.0617	4.4626	0	0	1.5838	0	0	0	2.7874	0.30027	2.5927	12.33	2.5669	0	4.6423	1.3634	8.7766	0	0	29.227	0	2.1781	4.4981	0	0	4.753
0	0.02058	0	0	0	0	0	0	0.16935	0	2.6546	0.97795	1.3951	0	0	0	0	0	1.7306	3.8958	0	0	0	0	0	0	1.9518	0.14638	4.9914	11.114	0	0	7.229	2.0465	9.4336	3.543	0	26.34	1.7279	3.8853	0	0	1.7425	7.0387
0	0	0	0	0	0.49544	1.3832	1.5018	0.10036	0	5.0072	0.84541	0.75219	0	0	0	0	0	2.5753	4.1537	0	0	0	0	0	0	0.44179	0.38671	3.3689	8.909	0	0	7.0221	1.7752	9.7442	0	0	25.637	5.5478	2.1789	2.8488	0	0	4.4303
0.23445	0	0	0	0	1.1194	0.00089499	2.2353	0.15443	0	4.3676	1.1018	1.3464	0	0	0	0	0	1.8832	2.1993	0	0	0	0	0	1.5108	0.43425	0	3.9108	4.9949	0	0	6.8224	1.364	10.97	2.1594	0	25.79	5.1856	2.7437	0	0	0.73728	7.3597
0	0	0	0	0	1.4768	0.3106	1.2606	2.848	0	3.9357	0.76477	1.282	0	0	0	0	0	1.3845	6.9255	0	0	0.84854	0	0	0	1.8158	0.38309	6.5195	9.7443	0	0	5.9487	1.6873	12.091	4.0214	0	24.574	4.6792	4.1237	1.7845	0	0	8.5522
0	0	0	0	0	1.3873	0	3.0529	0.40425	0	4.8703	0.57705	1.2719	0	0	0	0	0	2.3235	3.6991	0.0531	0	2.1321	0	0	0	2.199	0.81673	9.5098	5.1668	0	0	5.7118	3.9175	12.556	8.3974	0	25.848	4.5767	3.3133	0	0	0	9.5897
0	0	0	0	0	3.423	0.9201	3.2384	1.2169	0	5.8621	0	1.2642	0	0	0	0	0	3.4571	5.603	0	0	5.1692	0	0	0	6.3222	0.3006	6.7502	10.12	0	0	4.4533	4.8009	14.024	2.5222	0	23.218	3.4754	2.5953	0.28159	0	1.4449	11.524
0	0	0	0	0	0.03846	3.2887	3.9466	3.5224	0	8.3591	0.70213	1.014	0	0	0	0	0	3.8602	4.0036	0.8002	0	3.4843	0	0	0	5.5243	0.85914	17.578	1.1751	0	0.9107	4.0191	4.1951	17.533	8.8933	0	24.728	11.875	2.2116	2.7364	0	2.6581	11.702
0.7023	0	0	0	0	2.3157	3.1691	4.1459	2.1048	0	8.5218	0.82337	0.53597	0	0	0	0	0	5.4425	7.9878	1.3682	0	9.2771	0	0	0	6.8174	2.7475	12.979	6.9208	0	3.0808	4.8447	6.4158	16.294	8.6763	0	25.026	13.376	2.1084	4.2099	0	1.6796	11.584
0	0	0	0	0	0.65424	0.64928	5.8861	3.2036	0	8.8994	1.8732	0.5728	0.046561	0	4.3095	0	0	4.2556	8.0542	0.33266	0	8.9614	0	0	1.2709	5.7518	1.4058	14.201	7.9828	0	4.1397	5.6652	7.2478	16.867	11.819	0	23.71	14.207	1.694	3.2875	0	7.9547	14.228
0.12397	0	0	0	0	2.4173	2.5966	7.4323	2.8742	0	8.399	2.389	0.65155	0	0	0	0	0	4.1604	8.0085	0	0	10.295	0	0	1.1414	6.1406	3.8989	11.541	7.1739	0	2.9945	6.6642	8.1986	17.354	10.503	0	23.86	11.677	0.091136	3.0934	0	4.1242	11.392
0.1181	0	0	0	0	3.6158	5.0315	8.6031	4.9183	0	11.089	3.3293	0.25219	0	0	0.1481	0	0	4.7339	10.965	0.33176	0	18.225	0	0	0	4.6817	7.5011	9.4932	9.4457	0	7.1572	5.1201	8.7112	16.88	13.616	0	22.032	18.383	1.4941	2.2817	0	8.9002	8.28
0.01263	0.74129	0.47947	0	0	3.1283	0.19917	8.8329	6.0551	0	12.928	2.3988	0.36442	0	0	0.6013	0	0	6.2453	10.294	0	0	19.262	0	0	0	5.317	7.078	16.08	5.4153	1.1072	6.3143	6.882	9.8356	15.239	11.262	0	21.106	17.305	0.80862	5.6686	0	7.6415	12.994
0.26499	0	0.21314	0	0	1.4344	3.302	10.271	4.2185	0	14.532	1.1914	0.421	0	0	0	0	0	3.989	15.909	0	0	21.073	0	0.1261	0	2.8747	8.2449	8.6748	6.8575	0.030717	8.25	5.5616	10.593	15.067	11.984	0	20.404	18.25	0	9.3317	0	10.647	10.2
0.20982	0	0.36975	0	0	1.1814	3.9876	14.168	5.9615	1.5608	14.733	3.0585	0	0	0	1.19	0	0	4.4127	11.344	0	0	20.399	0	0	0	2.5863	10.099	9.3718	4.4788	0	7.2094	6.4282	12.78	16.911	15.162	0	17.857	18.058	0	8.2081	0	7.3068	9.4123
0	0.16757	0	0	0	1.7583	6.5868	12.685	4.6531	1.242	15.284	0.68888	0.20748	0	0.27056	0.61279	0	0	6.2354	8.8341	0	0	21.174	0	2.768	0	3.3715	8.0239	11.008	5.1844	0.80766	5.735	6.1871	13.151	14.749	13.043	0	18.57	22.991	0	7.4978	0	10.672	9.7514
1.075	0	0	0	0	2.9029	5.9768	14.436	5.3093	2.0521	15.584	1.7126	0.4424	0	0	2.2886	0	0	3.2907	9.3621	0	0	21.2	0	2.8668	0	1.6134	11.613	14.666	8.4916	0	9.113	7.5315	16.886	13.543	14.151	0	20.004	19.074	0	9.6123	0	12.172	6.8893
1.2062	0.059949	0	0	0	4.1505	2.1733	13.421	2.7813	0	17.778	1.1835	0.67826	0	0	1.2648	0	3.3066	3.2924	16.963	0	0	23.106	0	4.1825	0	1.6317	11.981	5.5011	3.4059	0	6.8264	6.0889	12.86	12.101	13.851	0	19.69	22.689	0	9.3671	0	12.591	9.9402
0.21099	0	0.179	0	0	2.7387	4.949	14.917	3.9714	1.0281	16.43	3.4069	0.12152	0	0	0.40003	0	0	6.1453	12.634	0	0	18.988	0	5.7798	4.9739	1.8938	11.511	10.042	2.8479	0	6.2968	2.8765	13.409	10.157	16.725	1.2775	19.606	24.744	0	11.512	0	13.993	7.6854
0.62506	0	0	0	0	2.1241	3.3366	12.529	3.4651	1.5048	16.993	4.4725	0.23475	0	0	0.33616	0	2.4796	5.6891	11.343	0.8222	0	21.444	0	5.8289	1.5808	1.1437	10.354	11.148	4.8772	2.526	6.573	1.5038	13.953	9.5384	13.744	0.9101	19.964	22.482	1.4214	10.474	0	12.022	8.4084
1.8534	0	0.51699	0	0	2.529	3.5302	11.25	2.1715	0.40367	13.872	1.1785	0	0	1.537	0.14274	0	3.0911	3.1382	13.093	0.85954	0	21.55	0	2.1379	0	1.1331	13.161	10.536	1.9006	5.035	5.1737	3.2323	11.551	7.3423	12.949	3.4329	21.308	18.648	0.91239	7.6702	0	10.643	9.1833
0.3247	0	0	0	0	2.6063	5.4181	11.265	1.8283	0	15.258	0	0	0	2.2995	0.11098	0	1.4287	3.5778	10.925	3.0199	0	20.061	0	4.5648	1.5226	2.0384	15.013	8.5062	7.8697	6.9705	6.3595	5.7415	10.983	9.4994	8.2414	3.8045	23.623	16.032	0	6.8308	0	10.4	8.6699
0.083009	0	0.71266	0	0	2.672	1.4891	10.164	1.6265	1.2006	13.873	0.29593	0	0	2.332	1.3149	0	2.2649	3.5707	14.101	0.8867	0	15.402	0	4.6452	2.8116	1.8433	13.004	10.922	0.64663	0.59758	6.0781	3.414	11.35	8.0555	7.2161	0.54427	23.122	15.23	0	7.8932	0	9.8849	5.5836
0.26788	0.00055893	0.2609	0	0	2.0617	4.1434	10.865	3.5881	0	12.433	1.6072	0	0	1.7648	0	0	0	3.1013	12.331	0.086767	0	19.015	0	2.32	0	0.18734	10.561	9.8347	0	0	3.1057	3.9703	8.5109	10.378	6.856	0	22.735	20.404	0	6.0847	0	6.5025	9.1477
0.34376	0	0.79962	0	0	2.4865	1.3207	8.8889	1.8481	0	11.133	1.0958	0	0	0	1.6492	0	0	4.1218	7.0945	0	0	9.5002	0	2.2206	9.8679	0.0061292	9.9717	11.086	3.0504	0.47312	0	3.8795	8.6082	9.2709	8.9705	0	20.215	13.591	0	5.4901	0	3.9394	7.2133
0	0	0	0	0	4.123	0.37509	9.7844	1.1352	0	11.752	1.7276	0	0	0	0	0	0	3.4563	7.9893	0	0	15.815	0	1.8396	0	0.37313	8.3183	9.2705	10.364	0	0	4.6137	6.5998	9.4036	7.9539	0	19.24	13.611	0	5.5528	0	4.8582	6.6962
0	0	0	0	0	0	0.2233	9.1589	3.286	0.12089	11.277	1.367	0.10079	0	0	0	0	2.5154	2.6201	8.3281	0	0	13.188	0	2.3146	0	0	7.6666	11.286	18.161	0	2.1761	3.068	5.8086	10.094	7.2771	0	19.804	11.626	0	3.849	0	5.563	5.69
0.33519	0.018395	0	0	0	3.7224	1.8649	11.964	4.6312	0	12.498	1.7926	0	0	0.075637	0	0	0	3.7713	7.6826	0	0	18.827	0	0.63433	0	0	7.8448	11.365	15.248	0	1.8859	2.3285	11.334	8.8177	8.8137	0	17.315	12.551	0	5.3872	0	7.3812	4.5379
0.12797	0	0	0	0	3.1348	0.91536	13.287	4.096	0.21598	12.805	2.8759	0	0	0	3.098	0	0	1.2689	9.905	0	0	16.816	0	3.0205	2.472	0	10.334	12.029	15.07	0	0	3.4931	10.273	8.2676	9.5453	0	14.876	16.946	0	4.9528	0	5.6001	9.7606
0.46989	0.22428	0	0	0	3.4696	1.4129	8.5808	4.4498	0	11.882	1.0473	0	0	0	0	0	0	4.4257	6.9403	0	0	16.636	0	4.0361	0	0	8.702	9.8063	16.099	0	0	2.6452	9.6169	9.2427	7.7677	0	14.998	13.852	0	4.5602	0	6.4678	7.4484
1.172	0	0	0	0	5.4146	0.21102	9.2795	3.9411	0	11.91	1.9195	0	0	0	0	0	0	1.6255	9.0505	0	0	18.014	0	4.6503	0.35865	0	9.2596	6.8707	10.916	0	1.6736	4.6668	12.954	6.9712	11.225	0	16.159	9.8827	0	5.8929	0	3.6463	9.2478
0.56694	0	0.084778	0	0	4.9895	0	10.322	4.5721	0	12.37	0	0	0	0	0	0	0	2.5903	5.2172	0	0	18.817	0	2.1009	4.2894	0	10.874	11.482	15.627	0	0	1.5213	9.0313	8.624	10.672	0	13.318	12.8	0	2.781	0	5.755	6.3943
0.92667	0.16241	1.3037	0	0	4.2998	0	10.175	0	1.1797	12.706	2.5187	0	0	0	0	0	0	3.8965	5.9123	0	0	22.746	0	0.84997	0	0	10.834	7.4979	13.915	1.0006	0	2.2854	10.027	6.7053	7.8995	1.5223	14.388	16.623	0	3.5904	0	6.7942	4.3879
0.79669	0	0	0	0	0.11504	0	9.1576	3.6648	0.41698	10.78	1.7155	0	0	1.2359	0.72992	0	0	3.2026	9.5894	0	0	22.55	0	3.2088	0	0	11.947	6.3312	6.5985	0.28069	0.91656	2.8653	11.242	4.8748	5.6557	0	16.23	11.149	0	7.5188	0	6.2094	7.1337
0.021233	0	0.44478	0	0	1.1012	0.021321	5.7942	0.47447	1.4211	9.687	0.76811	0	0	0	0.68541	0	0	1.936	7.4739	0	0	18.681	0	5.2571	0	0	11.052	6.1239	6.4947	0	3.111	1.8553	10.35	5.4024	8.0966	0	17.826	11.682	0	7.2013	0	6.8781	4.729
0.46656	0	0	0	0	0.96271	0	6.4784	2.8395	0.16456	7.2323	0	0	0	0	0	0	0	2.1288	7.2801	0	0	14.287	0	5.1014	0	0	10.625	3.004	4.5466	0	0.59255	0.63009	9.1572	6.1865	2.3544	0	16.021	6.2116	0	6.9854	0	4.7673	6.8752
0.030019	0	0	0	0	3.2767	0.08818	4.2713	0	0	8.4241	1.2072	0	0	0	0	0	0	2.7198	6.5912	0	0	16.45	0	3.0899	0	0.24531	8.9228	3.1698	1.6757	0	0.21912	0	6.5866	4.5665	5.6354	0	18.36	11.235	0	5.3166	0	4.2638	8.7525
0.30615	0	0	0	0	1.9798	0	4.4536	0.098625	0	6.7443	0.84255	0	0	0	0	0	0	3.5358	7.5697	0	0	12.072	0	4.8938	0	1.4059	8.467	6.461	4.9089	0	0	6.4487	7.5356	4.8977	2.959	0	19.764	10.255	0	5.3385	0	4.7475	5.2012
0	0	0	0	0	1.2342	0	4.4217	0	0	6.5951	1.399	0	0	0	0	0	0	1.8828	2.7369	0	0	11.1	0	3.4806	0	0.36546	7.4184	4.2376	3.7981	0	0	1.6408	3.1025	4.5831	3.4566	0	22.356	6.1429	0	4.3273	0	7.021	6.7087
0	0	0	0	0	1.2227	0	2.8388	2.4673	0	4.3177	0.25218	0	0	0	0	0	0	1.8423	1.7974	0	0	10.256	0	3.4069	0	0	6.5704	2.705	4.2024	0	0	0.65566	4.6115	3.3814	4.3789	0	22.789	6.8887	0	3.1331	0	0.85719	6.8457
0	0	0	0	0	0.82832	0	2.011	0	0	4.3484	0.53576	0	0	0	0	0	0	2.0653	5.8012	0	0	12.178	0	4.3062	0	0	10.379	3.054	1.9604	0	0.24384	4.055	2.9002	2.0964	0	0	27.477	11.325	0	3.0156	0	2.456	6.2539
0	0	0.22863	0	0	1.5208	0.90023	0.3855	0.13107	0	2.9179	0	0	0	0	0	0.95242	0	0.49395	4.2896	0	0	7.6058	0	5.6402	0.69048	0	5.7116	7.0526	8.4929	1.4571	0	1.8764	3.9019	1.4096	1.8467	0.28046	31.707	1.7924	0	5.0475	0	3.2596	11.045
0.068275	0	0	0	0	0	2.9544	0.69874	0	0	1.8341	0	0	0	0	0	0	0	1.9819	10.056	0	0	14.217	0	7.051	0	0.21877	5.6635	0	8.7424	0.7088	0	5.3213	2.4025	0.21905	0	0.59469	30.961	1.4143	0	6.4729	0	4.9595	10.131
0	0	0	0	0	0	0	2.5819	0	0	3.4141	0	0	0	0	0	0	0	1.9617	6.111	0	0	11.986	0	4.7222	0	0	8.6063	1.0341	13.201	0	0	2.7755	2.6966	0.85305	0.8676	0	32.492	0	0	5.8289	0	3.7785	11.841
0	0	0	0	0	0	0.096515	0.75708	0	0	2.3739	0	0	0	0	0	0	0	1.8854	5.8893	0	0	9.5413	0	5.7876	4.9407	1.8224	7.9888	2.8103	16.543	0	0	0.49708	1.33	0	1.4746	0	35.521	0	0	7.0853	0	2.4077	13.392
0	0	0	0	0	0	1.244	0.3009	0	0	2.1703	0	0	0	0	0	0	0.09326	0.1578	6.7339	1.2683	0	10.331	0	5.2519	1.6365	1.1856	7.1554	0.20595	26.66	0	0	4.3646	1.8916	1.9151	0	0	38.076	0	0	7.5294	0	6.455	13.826
0	0	0	0	0	0	0	1.8519	0	0	4.7424	0	0	0	0	0	0	0	0	7.5676	0.63484	0	8.6975	0	2.8329	6.3589	2.6248	8.6066	1.3509	35.836	2.852	0	4.1529	1.7271	3.1184	0	0	35.546	0	0	5.6888	0	7.4489	14.15
0	0	0	0	0	0.75646	0.65406	1.2868	0	0	2.9188	0	0	0	0	0	0	0	0.54483	8.0685	1.0235	0	5.012	0	1.8078	0	2.8686	7.0071	0	46.646	0	0	11.424	0	5.098	0	0	34.427	0	0	1.1543	0	8.4309	13.633
0	0	0	0	0	1.0008	0	0	0	0	2.8579	1.2572	0	0	0	0	0	0	1.2119	5.2049	0.19314	0	8.3536	0	1.4556	0.07226	2.9099	6.1591	0.51104	47.641	0	0	13.992	0.092134	3.7934	0.32528	0.16701	37.287	4.4096	0	6.2891	0	8.5191	12.815
0	0	0	0	0.13444	0	0	0.46394	0	0	3.1142	0.23769	0	0	0	0	0	0.4442	1.0485	5.7364	0	0	5.4333	0	0.74259	1.804	2.5684	9.0385	0	65.848	0	0	10.98	1.7876	2.6959	0	0	37.652	2.4722	0	2.1782	0	7.7808	11.722
0	0	0	0	0	0	0	0	0	0	2.4117	0	0	0	0	0	0	0	0	2.9416	0.6892	0	4.4156	0	1.0911	1.9024	1.6886	7.5007	0	68.209	0	0	16.954	1.6256	2.849	0	0	39.89	6.7947	0	2.8429	0	15.986	11.671
0	0	0.013078	0	0	0	0.63785	0	0	0	0	0	0	0	0	0	0	0.42318	1.5728	6.5227	0.51177	0	3.5309	0	4.1995	0	1.4817	9.2616	2.5589	61.335	0	0	18.78	1.7916	3.9153	0	1.6589	41.532	4.5785	0	2.4256	0	16.141	13.147
0	0	0	0	0	0.40892	2.0023	0	0	0	1.8523	1.1127	0	0	0	0	0	3.8614	1.6768	5.0541	1.2777	0	7.0471	0	2.7074	0	1.379	9.3505	0	67.863	0	0	15.571	0.925	3.6502	0	0	40.999	2.1883	0	5.3808	0	11.766	13.34
0	0	0	0	0	0	0	1.1527	0	0	1.9779	0	0	0	0	0	0	0	0.28803	3.6748	1.7422	0	5.7078	0	3.5705	7.3827	0.38574	7.2244	2.2402	70.8	0	0	13.496	0.37528	1.2692	0	0	42.775	1.9115	0	7.3837	0	12.771	9.8179
0	0	0	0	0	0	0	0.24648	0	0	1.2554	0	0	0	0	0	0	0.030458	0.7577	2.6273	1.0248	0	4.8185	0	5.3742	0	0.39801	7.3364	5.3659	62.917	0	0	14.966	0.68137	0	0	0	44.812	2.3064	0	7.564	0	10.446	11.321
0	0	0	0	0	1.5116	0	0	0	0	1.9138	0	0	0	0	0	0	2.3822	1.5785	2.5805	1.209	0	10.217	0	7.1753	2.8164	0.66115	6.4568	2.9414	66.521	1.1947	0	9.3379	2.2746	0	0	0	44.329	5.3104	0	5.8551	0	14.769	10.061
0	0	0	0	0	0	0	0	0	0	1.0891	0	0	0	0	0	0	0.28895	0	6.0252	0	0	11.755	0	6.2656	0	0	9.6131	3.4293	64.505	0.316	0	11.116	2.5143	0	0.48175	0	44.026	3.7974	0	6.4549	0	17.713	8.8059
0	0	0	0	0	0	0	0	0	0	1.6638	0	0	0	0	0	0	0	0.27576	3.2145	0	0	11.109	0	4.0792	0	0	7.8549	0	65.143	0.58169	0	7.3761	1.1776	0	0	0	44.974	0.63684	0	3.3606	0	17.617	11.023
0	0	0	0	0	0.96422	0	0	0	0	1.7933	0	0	0	0	0	0	0	0.9995	6.6582	0	0	12.05	0	5.5846	1.142	0	7.3968	0.23823	53.6	0	0	3.2551	0.14562	0	0	0	45.408	4.6129	0	4.1014	0	20.951	9.078
0	0	0.58259	0	0	1.4954	0	0.088699	0	0	2.0158	0	0	0	0	0	0	0	0	6.1902	0	0	10.677	0	5.5031	0	0	7.5565	1.6605	57.253	0.27187	0	5.982	0	0	0	0	50.536	4.3784	0	6.8211	0	19.309	9.7536
0	0	0	0	0	0.63459	0	0	0	0	0.60686	0	0	0	0	0	0	0.91405	0	3.655	0	0	11.01	0	8.7304	3.9462	0	7.9187	4.0663	62.336	5.7638	0	11.769	0.79221	0	0	0	55.692	3.4712	0	4.7101	0	25.801	9.8202
0	0	0	0	0.39502	1.0747	0	1.1685	0	0	0.87153	0	0	0	0	0	0	0	0.12862	7.2492	0	0	9.5513	0	7.1755	0	0	7.6248	4.8604	65.414	0	0	9.0862	3.0036	0	0	0	54.8	6.4423	0	5.1437	0	28.174	10.866
0	0	0	0	1.8441	0.99026	0	0	0	0	1.1031	0	0	0	0	0	0	0	0.509	2.9589	0	0	9.8448	0	7.5252	0	0	11.1	0	62.162	0.1527	0	7.0835	0.73489	0	0	0	56.006	0	0	5.8358	0	23.082	9.632
0	0	0	0	0	0	0	1.096	0	0	1.8024	0	0	0	0	0	0.28724	0	1.3303	3.3752	0	0	8.059	0	7.0566	3.7559	0	9.94	4.3266	56.717	6.8925	0	6.8852	2.0447	0	0	0	57.44	4.4318	0	4.1001	0	24.769	9.4444
0	0	0.23813	0	0.15153	0	0	1.8041	0	0	0.87814	0	0	0	0	0	0	0.4787	0.92318	1.4533	0	0	6.2803	0	7.9952	0	0	12.652	1.3803	51.969	0	0	4.3128	2.6526	0	0	0	55.591	5.7681	0	5.687	0	24.738	8.9037
0	0	0	0	0	0	0.58221	0	0	0	1.8956	0	0	0	0	0	0	1.7932	0.74316	1.4176	0	0	2.8712	0.59282	6.9092	4.2993	0	13.517	2.4454	51.915	2.5934	0	4.4462	0.73418	0	0	0	54.266	3.4524	0	3.7368	0	21.705	10.846
0	0	0	0	0.16094	1.069	0	0	0	0	0.47245	0	0	0	0	0	0	4.9969	0.88054	0	0	0	6.969	0	9.8027	6.623	0	12.532	0.19519	48.447	0.69114	0	1.0514	0	0	0	0	55.866	6.6362	0	4.4601	0	21.531	7.7204
0	0	0	0	0.21858	1.3966	0	0	0	0	0.92327	0	0	0	0	0	0	0	0.23374	0	0	0	4.2708	0	8.707	1.2849	0	13.444	0.93409	41.937	0.42104	0	6.656	0	0	0	0	57.521	5.1414	0	8.9294	0	17.038	8.2463
0	0	0	0	0.96436	0.75476	0	0	0	0	1.8445	0	0	0	0	0	0	0.90466	2.6127	2.1909	0	0	2.4037	0	8.565	1.8023	0	16.315	0	49.372	0.11563	0	3.9893	0	0	0	0	57.606	7.6591	0	6.8123	0	19.31	4.6618
0	0	0	0	0	0.67285	0	0.97	0	0	1.4159	0	0	0	0.28294	0	0	0	1.0242	0	0	0	1.8424	0	7.8491	0	0	13.602	0.1291	46.365	2.6754	0	3.9166	0.56957	0	0	0	55.334	4.5662	0	5.5733	0	19.433	7.9954
0	0	0	0	0	2.3498	0	1.8674	0	0	1.3766	0	0	0	0	0	0.15595	1.1189	2.102	4.0261	0	0	0.37623	0	6.7828	2.0099	0	11.729	5.3734	38.704	4.7168	0	0	0.46777	0	0	0.31418	54.593	3.8824	0	3.9939	0	17.88	7.9323
0.36793	0	0	0	0	0.3315	0.16715	0.21439	0	0	1.3574	0	0	0	0	0	0	0.33423	2.1549	2.7251	0	0	2.6129	0	7.1338	4.27	0	12.029	1.9417	41.44	1.7617	0	2.111	0	0	0	0	56.359	5.923	0	4.828	0	20.003	8.1966
0	0	0	0	0.29885	2.2135	0	3.1707	0	0	1.0911	0	0	0	0	0	0	0	1.6609	3.9114	0	0	3.3371	0	6.0479	1.2356	0	12.18	2.7627	46.715	6.545	0	0	0	0	0	0	53.807	5.2826	0	3.6301	0	15.684	9.5287
0.31047	0	0	0	0	0.39068	0.60765	2.006	0	0	1.7642	0	0	0	0.78291	0	0	0	1.7652	2.7108	0	0	3.9895	0	7.6864	4.584	0	12.812	3.5213	39.651	1.8636	0	0	4.2618	0	0	0	52.923	8.4645	0	5.6482	0	11.229	9.1591
0.084474	0	0.6443	0	0	0	0.62444	4.5272	0.50528	0	4.4574	0	0	0	1.321	0	0	0	0.21741	4.0841	0	0	6.2013	0	7.4663	2.5767	0	10.847	0.70239	41.495	3.1008	0	1.5215	0	0	0	0	54.334	5.5227	0	5.426	0	12.923	7.8095
0	0	0	0	0	4.3555	0.97155	5.6307	0	0	1.502	0	0	0	0	0	0	0	1.8563	6.0977	0	0	4.0214	0	5.2008	1.1568	0	13.19	4.703	46.329	0	0	0.34868	1.6363	0	0	0	53.833	4.7787	0	6.0366	0	10.541	6.6902
0	0	0.23638	0	0	0	0	4.0649	0	0	2.4041	0	0	0	0	0	0	0	0.73418	5.5017	0	0	3.2429	0	6.6786	0	0	11.008	1.9449	56.01	1.933	0	0	2.9261	0	0	0	55.498	5.3286	0	5.8686	0	12.697	11.393
0	0	0	0	0.81795	0	0.60589	4.9112	0	0	1.8565	0	0	0	0	0	0	1.8108	0.99121	8.6388	0	0	3.8776	0	7.322	2.9761	0	11.428	3.6156	64.46	0	0	0	1.3921	0	0	0	57.222	4.8324	0	3.3483	0	12.98	6.1444
0	0	0.12793	0	0	0	0	3.0087	0	0	0.45303	0	0	0	0	0	0	0	3.0892	3.8836	0	0	3.5726	0	6.266	0.66848	0	11.264	3.5775	62.615	1.8538	0	0	2.0318	0	0	0	55.096	7.3383	0	4.8609	0	12.742	8.5763
0.39902	0	0	0	0.45421	0	1.3039	4.2309	0	0	1.1922	0	0	0	0	0	0	2.5401	1.8939	4.7741	0	0	0	0	5.4716	2.3459	0	11.189	0	63.992	5.6117	0	0	0	0	0	0	55.724	9.031	0	3.7071	0	16.832	7.6304
0	0.37563	0	0	0	0	1.7708	4.6085	0	0	3.103	0	0	0	0	0	0	2.9536	2.7191	1.83	0	0	5.8209	0	5.7895	4.1119	0	10.478	4.1903	56.777	0.77677	0	0.65578	0.67367	0	0	0	55.343	4.6356	0	5.6474	0	16.003	8.9645
0	0.4142	0	0	0.51707	0.76285	0.29086	5.4766	0	0	1.9585	0	0	0.56749	0.22664	0	1.1803	3.0862	1.2258	2.0876	0	0	4.1473	0	8.3838	7.1305	0	12.92	3.7416	58.415	5.0297	0	0	0.32045	0	0	0	56.666	4.633	0	4.8137	0	14.759	6.5194
0.73345	0.41106	0.014385	0	0.57115	0.98149	0.51876	6.7619	0	0	1.8978	0	0	0	0	0	0.47361	1.7063	5.2669	1.3638	0	0	1.7531	0	8.1931	4.8126	0	12.785	5.5757	56.829	7.3358	0	0	0	0	0	0	56.918	5.6385	0	5.8879	0	14.43	6.5329
0.88235	0.38403	0	0	0.80709	0	0	7.5985	0	0	1.2649	0	0	0.35996	0.48992	0	1.0981	2.8893	6.4347	1.3418	0	0	3.2266	0	8.9129	0.65896	0	15.308	3.1086	55.287	7.4052	0	0	3.2134	0	0	0	56.617	7.5265	0	7.932	0	15.374	8.6097
0.48719	1.0154	0.37602	0	0.55627	0	0	8.0858	0	0	2.2481	0	0	1.4257	0	0	1.7096	2.3768	3.0894	0.75949	0	0	0.64667	0	6.3224	9.0977	0	13.072	5.6877	57.023	5.7075	0	0	2.5005	0	0	0	56.488	5.9852	0	5.2734	0	11.973	6.4443
0.4448	1.3547	0.21883	0	0.98708	0	0.32508	6.4739	0	0	1.5742	0	0	0	0.23477	0	1.215	0.097034	3.9997	0.067513	0	0	2.6521	0	10.066	5.3038	0	14.106	5.4373	55.635	4.5565	0	0	2.4038	0	0	0	53.695	5.1713	0	5.0235	0	12.908	6.6605
0.76261	1.1699	0	0	0.98434	3.2732	0	10.43	0	0	2.2924	0	0	0.55949	1.0168	0	0.78312	1.1296	3.0905	3.1498	0	0	7.8	0.89029	5.4177	5.4191	0	12.996	2.15	48.341	4.0928	0	0	2.538	0	0	0	53.259	8.8379	0	4.9079	0	8.5212	7.1452
0.61395	1.287	0.22039	0	1.0586	0	0	9.5408	0.23953	0	0.23812	0	0	0	0.16808	0	0.16812	2.068	1.8589	1.8275	0	0	4.7768	0.94315	4.0389	0	0	11.835	8.6232	55.248	1.1119	0	0	2.2942	0	0	0	51.442	4.1911	0	2.7503	0	6.8146	4.9627
0.80631	1.36	0	0	0.14476	0	0	9.9867	0	0	0.38271	0	0	0	0	0	0	2.0136	3.299	1.2969	0	0	4.4461	1.8281	1.6192	0	0	9.7504	7.7631	61.566	6.374	0	0	2.5599	0	0	0	49.353	4.4968	0	4.2181	0	6.3274	4.8311
0.72196	0.82948	0	0	0	0.25526	1.6048	7.2196	0	0	0.91729	0	0	0	0.23233	0	1.857	0	2.4805	3.0846	0	0	2.0989	0.049838	2.0707	3.5694	0	12.821	6.4695	64.959	4.388	0	0.63211	1.7683	0.023076	0	0	48.569	0	0	8.0855	0	7.1564	4.9605
0.42502	0.4264	0.1467	0	0	0	0	5.3741	0	0	1.2105	0	0	0	1.2501	0	0	1.1721	3.8973	2.6443	0	0	2.411	0	3.3306	0	0	11.502	4.2408	71.351	0.0033098	0	0	0.64964	0	0	0	47.721	0	0	7.5733	0	6.7775	8.0579
0.29297	1.1306	0	0	0	0	0.41458	6.3463	0	0	0.68104	0	0	0	0	0	0.36679	0	1.5129	3.3588	0	0	0	0	4.1122	3.3656	0	11.998	6.0684	73.999	2.3885	0	2.1929	0.22382	0	0	0	47.676	0	0	3.814	0	11.859	6.8865
1.178	0.61419	0	0	0	0.54764	0	6.6622	0	0	0.96673	0	0	0	0	0	1.734	0	1.5013	5.1401	0.37688	0	1.9854	1.509	4.7549	0	0	12.312	1.572	73.179	0.5711	0	2.6722	1.1071	0.27391	0	0	50.153	0	0	6.1951	0	13.876	10.183
0.98352	0	0.26798	0	0	0	0	4.6971	0	0	0	0	0	0	0	0	1.4526	0	2.0861	5.1151	0.80628	0	0.20852	0.47379	8.1785	3.3616	0	13.833	0	78.919	0.55168	0	5.6997	0	0	0	0	48.669	0.25671	0	8.195	0	15.033	8.9636
1.4741	0	0	0	1.3679	0	0	7.7764	0	0	0.41273	0	0	0	0	0	0.47351	0	3.4772	4.2182	1.2961	0	0	2.7942	7.7833	5.5208	0	12.194	4.1512	75.293	0	0	0.8092	0	0	0	0.37091	49.735	0.61512	0	3.7131	0	14.419	11.162
0.22281	0	0	0	0	0	0	5.2043	0	0	1.0622	0	0	0	0	0	1.6295	0	0.87498	4.003	0.35347	0	0	3.2684	8.2901	0.15115	0	8.5827	0	79.85	0.089151	0	2.6527	0.11056	0	0	0.02039	49.222	0	0	7.3732	0	8.9485	12.103
0.19973	0	0	0	0.026087	0	1.1112	6.3364	0	0	0.28947	0	0	0	0	0	0	0	1.6314	2.106	0.59478	0	0.14427	3.3355	8.2963	4.6968	0	12.893	0	80.155	0	0	0.70546	0	0	0	0.24635	49.026	0	0	8.5172	0	10.97	15.541
0.61788	0	0	0	0	0	0	2.7036	0	0	2.1012	0	0	0	0	0	1.2305	0	1.7985	4.1328	0.33817	0	0	4.5066	8.1531	2.5019	0	10.833	0	84.756	1.7755	0	2.7713	0	0	0	0	49.032	0	0	8.2552	0	10.941	13.211
0.2511	0	0	0	0	0	0	4.4778	0	0	2.0331	0	0	0	0	0	0.94001	0	2.4683	7.0341	1.4095	0	0.44536	4.135	4.746	4.5721	0	8.9647	0	78.693	0	0	3.3639	0	0	1.085	0	50.867	0	0	6.8684	0	12.148	12.054
0	0	0	0	0.64859	0	1.3927	2.8611	0	0	1.5543	0	0	0	0	0	0	0	0	5.3197	0.41268	0	0	5.4401	3.0163	5.6125	0	10.587	1.203	77.604	1.8637	0	3.6476	0	0	0	0	52.928	0	0	5.8514	0	13.063	11.25
0	0	0	0	1.1072	0.27977	0	1.5773	0	0	1.4328	0	0	0	0	0	0	1.0405	1.6571	5.95	2.5182	0	0	5.6643	3.3721	4.5573	0.07482	9.8543	1.9163	76.849	0	0	3.5094	0	1.2735	0	0	54.031	0	0	4.2012	1.3023	14.789	13.499
0.53866	0	0	0	0	0	0	3.4745	0	0	2.3335	0	0	0	0	0	0	0	0.89811	1.643	3.323	0	0.28652	3.142	7.5197	0	0.42297	11.077	0	66.32	0	0	3.3833	0	4.0251	0	0	56.74	0	0	7.973	0	13.043	14.36
0.03551	0	0	0	0	0.4901	0	0.74191	0	0	1.6347	0	0	0	0	0	0.51328	0	1.7098	3.5862	1.6217	0	0	0.98227	2.2154	0	0	6.4347	3.7464	62.458	0	0	6.9628	0	4.8941	0	0	55.312	0	0	7.0721	0	15.245	14.406
0	0	0	0	0	0.079302	0	2.4881	0	0	2.4022	0	0	0	0	0	0	0	1.3928	1.6843	0.8549	0	0	2.6931	1.1252	0	0	5.4872	7.7603	64.51	0	0	6.8374	0	3.7359	0	0	54.383	0	0	4.72	0	15.334	13.745
0	0	0.51578	0	0	0	1.0694	0.16918	0	0	1.9919	0	0	0	0	0	0	0	2.9605	1.8471	1.2334	0	0	0	4.7355	0.46472	0	8.7836	3.6191	60.362	1.5653	0	10.312	0	3.7301	0	0	56.902	0	0.053206	5.1105	0	16.728	15.02
0	0	0	0	0	0.55705	0	0.48223	0	0	0.036712	0	0	0	0	0	0	0	1.4385	2.0744	1.2533	0	0	0	2.3175	0.30097	0	7.286	2.3081	63.385	1.2918	0	10.329	0	2.5653	0	0	58.819	0	0.5611	6.4499	0	14.184	14.587
0	0	0	0	0	0	0	0.35267	0	0	1.398	0	0	0	0	0	0	0	1.4389	2.6304	0.61023	0	0	0	4.4396	1.1023	0	6.7305	3.4347	59.334	0	0	10.643	0	1.6719	0	0	60.919	0	0	5.2325	0	13.41	15.26
0	0	0.43034	0	0	0	0	1.3024	0	0	0.11601	0	0	0	0	0	0	0	2.2126	3.524	1.8287	0	0	0	3.4901	0	0	7.1483	1.6739	65.949	0	0	9.419	0	1.5042	0	0	61.347	0	0.44447	6.9244	0	11.076	14.385
0	0	0	0	0	0	0	0	0	0	1.4493	0	0	0	0	0	0	0	1.2874	0.88906	0	0	0	0	3.1452	0.10077	0	6.3493	7.2266	61.379	1.927	0	10.38	0	0.23825	0	0	63.204	0	0	5.2196	0	9.3508	11.724
0	0	0	0	0	0	0	0.51322	0	0	1.6353	0	0	0	0	0	0.65551	0	0.88731	3.653	0.30705	0	0	0	3.3577	1.9177	0	8.4319	3.1107	64.84	4.0697	0	9.6345	0	1.0219	0	0	64.893	0	0	5.6804	0	6.5752	12.213
0	0	0	0	0	0	0.015355	2.2017	0.98935	0	3.0308	0	0	0	0	0	0	0	1.4764	2.3688	0	0	0	0	3.9538	3.3361	0	8.7766	8.3019	61.706	0	0	12.256	0	0	0	0	65.009	0	0.78504	4.3237	0	9.9413	11.706
0	0	0	0	0.064646	1.4659	0	1.7891	0	1.4781	3.0958	0	0	0	0	0	0	0	0	4.8954	0	0	0	0.2368	3.2165	0	0	9.013	5.955	55.847	1.9225	0	8.3103	0	0.076784	0	0	64.86	0	1.5821	4.685	0	5.2577	8.538
0	0	0.13119	0	1.0772	0	0	1.7767	0	1.6633	1.5193	0	0	0	0	0	0	0.39083	0	0.22935	0	0	0	0	3.1754	4.4829	0	6.6575	6.6033	52.714	3.8534	0	7.7529	0	0	0	0	65.683	0	0	4.5512	0	8.1886	9.7204
0	0	0.80269	0	0	0.60217	0	0	0	1.1691	3.6675	0	0	0	0	0	0.17312	0	0	6.7701	0	0	0	1.5191	3.7025	0	0	5.811	6.2887	47.12	0	0	9.438	0	0.09843	0	0	65.447	0	0	4.5414	0	8.7032	8.5129
0	0	0	0	0	0	0	3.1136	0.77033	1.0174	4.4683	0	0	0	0	0	0	0	1.4548	8.925	0	0	0	0.65509	4.1303	0	0	5.3715	4.7984	43.439	3.3588	0	10.063	0	0	0	0	67.376	0	0	6.3587	0	8.345	8.4059
0	0	0	0	0.76894	0	0	2.806	0	0	2.8792	0	0	0	0	0	0	0	1.5518	5.2051	0	0	0	1.4259	5.837	0.23733	0	6.0667	0	42.234	0	0	8.0793	0	0	0	0	67.269	0	0	5.0598	0	8.4355	12.007
0	0	0	0	0	0	0	3.0187	0	0	2.3302	0	0	0	0	0	0	0	3.5047	5.7648	0	0	0	2.3211	11.066	6.9483	0	5.9543	0.51104	50.108	0	0	9.7969	0	0	0	0	72.43	0	0.25262	6.2205	0	5.7315	8.9331
0	0	0.047651	0	0.73999	0	0	2.8604	0	0	3.8654	0	0	0	0	0	0	0	1.5527	6.156	0	0	0	0.14111	7.4453	0.59067	0	7.7968	2.1474	36.353	0	0	9.8	0	0	0	0	69.252	0	0	6.8982	0	11.957	10.302
0	0	0	0	0	0	0	2.7041	0	1.6134	3.6965	0	0	0	0	0	0.15477	0	2.0142	5.8557	0	0	0	2.541	9.535	0	0	7.7529	0.30739	32.06	0	0	4.8269	0	0	0	0	70.131	0	0.93833	6.2952	0	8.8252	10.309
0	0	0	0	1.7504	0	0	1.3317	0	5.1746	5.4359	0	0	0	0	0	0.50553	0	1.9421	8.2491	0	0	0	1.4391	10.778	2.3006	0	8.8309	1.2993	30.305	0.98275	0	11.783	0	0	0	0.13646	72.189	0.17377	1.8765	6.4579	0	8.7896	9.2725
0	0	0	0	0	0.70086	1.0322	2.5525	0	12.625	7.8305	2.1876	0.024411	0	0	0	0	0	1.6267	1.8601	0	0	0	2.0483	8.6551	0	0	8.8049	3.3149	29.872	0	0	23.48	0	0	0	0	71.433	2.4766	6.312	7.2478	0	9.032	10.165
0	0	0.5927	0	0.34424	0	1.7197	2.8783	0	16.606	5.7463	1.9527	0.20424	0	0	0	0	0	0.24684	6.3856	0	0	0	0	7.8971	0.6759	0	9.7279	10.647	35.283	0	0	28.824	0	0	0	0.32807	72.965	5.0132	9.0859	9.8985	0	7.3849	11.281
0	0	1.7701	0	0.67519	0	1.1368	3.4773	0	15.876	7.4411	1.1886	0.45505	0	0	0	0	0	4.3962	5.3494	0	0	0	0.8008	9.5266	4.7473	0	10.303	6.1196	26.737	0	0	36.25	0	0	0	1.906	73.618	5.7932	10.35	10.892	0	6.4722	9.9161
0.034412	0	1.3544	0	0	0	2.8724	1.5579	0	14.881	6.5438	3.5324	1.3616	0	0	0.4293	0.41081	0	2.695	7.5683	0	0	0	1.9995	6.635	4.6792	0	9.6041	2.2197	23.121	0.59758	0	37.267	0	0	0	0.6712	71.62	3.7616	12.826	7.7724	0	6.8927	10.588
0	0	0.79821	0	0	0	3.9979	3.5412	0	13.198	5.9485	1.473	2.6644	0	0	0	0	0	1.4081	8.3888	0	0	0	0	6.8564	3.7878	0	9.0955	6.0897	23.783	0	0	47.571	0.2	0	0	1.2272	70.4	4.3288	20.668	8.2751	0	4.8067	11.839
0	0	0.15355	0	0	0	1.7164	1.3461	0	11.837	6.2206	1.1275	3.9557	0	0	0.883	0	0.33908	3.3439	3.9629	0.82642	0	0	0.99306	4.3666	4.6921	0	9.2693	6.0025	21.943	0	0	54.072	0	0	0	0	67.389	4.0394	27.001	8.5413	0	6.1045	8.5908
0	0	0	0	0	0.28555	1.9359	2.0002	0	8.1333	4.8401	0.41808	3.423	0	0	0.59798	0.27549	0	2.5526	1.3643	0.87975	0	0	0	4.1135	4.0487	0	6.1703	8.6142	15.814	0	0	55.872	0	0	0	4.1737	67.116	4.139	29.58	6.0414	0	9.7332	10.881
0	0	0	0	0	0	0.2834	0	0	7.2333	5.0308	0.72468	3.7031	0	0	0	0	0	2.3153	9.5286	4.184	0	0	0	5.6512	2.1158	0.20564	7.6483	6.9109	15.688	1.7559	0	64.304	0	2.9576	0	0	67.335	5.9523	28.531	8.6809	0	8.6909	13.686
0	0	0	0	0	0	0	0	0	7.8594	6.0631	0.88425	3.7294	0	0	0	0	0	5.2274	6.4859	11.381	0	0	0	7.0716	0	0.76467	7.5482	12.55	14.552	0	0	61.794	0	8.1684	0	2.634	68.409	3.6536	29.509	8.6604	0	9.5092	16.822
0	0	0	0	0	0	2.2324	0	0	8.941	5.3874	0	3.7717	0	0	0	0	0	11.717	2.817	16.775	0	0	0	5.2286	0	4.757	6.0158	8.4825	16.945	0	0	65.946	0	13.685	0	3.7298	67.342	13.535	27.281	8.2865	0	12.365	18.18
0	0	0	0	0	0	1.4141	0	0	12.086	3.9359	2.4057	4.2287	0	0	1.3746	0	0	11.701	5.7176	21.798	0	0	0	3.1152	0	6.8769	7.0448	13.65	16.317	0	0	69.531	0.60704	18.636	0	1.6605	65.555	12.663	25.721	11.275	5.2912	14.69	19.703
0	0	0	0	0	0	0.97604	0	0	20.072	5.6678	2.7585	4.3722	0	0	0.63305	0	0	9.1779	8.9819	25.885	0	0	0	1.1875	0	9.1151	4.2062	14.479	13.431	0	0	70.885	3.1992	23.977	1.5699	1.9527	63.827	4.8924	26.498	10.694	10.718	13.069	20.105
0	0	0	0	0	0	2.4686	0.5448	0	22.291	6.3516	2.4077	5.1092	0	0	1.5978	0	0	12.426	4.3969	32.058	0	0	0	2.7858	0	12.583	5.6455	14.872	16.502	0	0	70.689	2.3486	27.807	3.8395	7.524	62.357	11.109	24.472	8.262	10.467	13.676	21.766
0	0	0	0	0	0	4.9949	0	0.052341	20.627	7.0616	3.593	6.6467	0	0	2.0989	0	0	13.521	0.81039	36.893	0	0	0	0	0	12.302	4.6074	18.646	13.986	0	0	70.466	6.5067	37.19	5.9131	3.1931	57.3	12.901	26.248	8.8226	14.928	12.737	24.923
0	0	0	0	0	0	4.5262	0	0	25.33	6.5187	5.7019	15.712	0	0	0.84679	0	0.65107	12.249	2.3018	46.657	0	0	7.994	0	0	14.076	1.8631	14.934	12.594	0	0	71.02	6.2944	50.947	12.449	5.2763	54.759	18.768	30.46	10.001	13.278	11.283	17.875
0	0	0	0	0	0	6.9019	0	0	26.285	5.9504	7.8493	31.653	0	0	0.90067	0	1.6393	20.075	0	50.925	0	0	25.675	0	0	15.149	2.1407	17.316	3.1272	0	0	62.98	12.712	46.515	11.218	12.733	57.808	2.7322	40.435	13.074	2.2392	11.302	15.592
0	0	0	0	0	1.876	3.378	0	0	27.933	6.0822	14.47	46.43	0	0	2.0326	0	2.9562	22.232	0.59906	57.741	0	0	34.719	0	0	17.6	2.0594	13.025	6.4471	0	0	64.437	18.175	48.462	10.46	18.165	61.532	5.7268	51.357	15.243	0	9.8811	18.128
0	0	0	0	0	0	6.8456	0.361	0	26.798	4.3673	14.836	52.249	0	0	0	0	10.72	23.727	0	58.733	0	0	38.509	0	0	20.118	0	14.219	2.5872	0	0	56.119	19.284	48.092	13.457	24.773	59.146	4.8667	55.87	18.781	0	13.986	20.467
0	0	0	0	0	0	5.0071	0	0	32.428	5.4617	16.752	54.733	0	0	0	0	1.2405	20.19	2.1431	60.127	0	0	36.326	0	0.53366	22.601	1.3797	10.216	5.3364	0	0	60.111	17.592	48.784	18.537	21.19	58.247	10.243	59.446	22.342	0	13.379	20.679
0	0	0	0	0	1.3358	7.8377	0	0	35.418	6.4379	16.396	55.997	0	0	1.7166	0	7.2269	20.268	1.6362	57.889	0	0	35.518	0	3.7343	23.427	0	14.22	0	0	0.11084	55.346	15.946	47.767	17.757	23.624	57.781	11.692	60.493	18.553	2.6672	14.303	18.399
0	0	0	0	0	1.9459	7.9587	0	0	38.437	6.3128	15.794	56.919	0	0	0	0	4.7463	19.652	0	57.01	0	0	36.916	0	6.0078	26.196	0	11.876	6.6647	0	0	48.464	17.657	44.069	22.123	24.009	58.083	8.8774	60.586	20.153	0	18.421	15.822
0	0	0	0	0	0	7.3997	0	0	37.207	6.4575	14.925	56.638	0	0	0	0	3.0571	21.061	0	54.044	0	0	34.799	0	18.368	28.259	1.0673	10.907	0	0	0	55.313	15.42	47.295	17.808	21.505	55.926	2.9329	60.775	18.617	3.8634	15.445	17.395
0	0	0	0	0	0.066709	5.4629	0	0	34.214	8.0561	15.43	56.073	0	0	0.77494	0	3.134	24.145	0	48.088	0	0	32.156	0	16.369	25.625	0	9.0633	0	0	0.034104	51.58	20.246	47.394	16.767	21.779	52.004	9.2588	56.955	14.637	6.8045	16.874	17.641
0	0	0	0	0	0.84267	3.7198	0.29999	0	30.668	7.8562	15.996	55.981	0	0	0.9614	0	3.1796	20.302	0	41.821	0	0	26.047	0	16.031	26.189	0	16.566	0	0	0	46.461	22.739	52.961	10.634	14.778	47.426	0	61.405	13.323	4.4054	15.452	22.403
0	0	0	0	0	2.5699	4.9055	0	0	27.12	7.856	14.598	56.944	0	0	0.86838	0	4.6971	24.144	0	41.781	0	0	28.602	0	17.539	24.709	0	14.549	0	0	0	50.77	26.023	52.117	10.211	19.113	45.804	0	61.57	12.85	1.1639	15.104	21.567
0	0	0	0	0	1.7491	5.4345	0	0	24.305	7.0054	14.761	58.697	0	0	3.5663	0	3.2626	32.034	0	42.216	0	0	32.919	0	15.732	25.49	0	10.927	0	0	2.8599	43.228	28.122	46.934	11.589	16.002	47.859	0	61.967	10.554	0.66952	18.155	21.226
0	0	0	0	0	1.7008	5.6412	0	0	22.968	5.9378	13.734	58.565	0	0	9.0002	0	1.0086	31.417	0	40.558	0	0	29.358	0	25.674	24.773	0	9.7576	0	0	0.057891	43.174	26.643	45.354	11.883	14.921	49.421	3.7401	63.958	12.623	0	17.12	21.023
0	0	0	0	0	0	2.9257	0	0	20.213	6.4895	12.765	57.216	0	0	6.8243	0	4.5811	31.385	0	41.044	0	0	32.456	0	27.908	25.775	0	7.9734	5.2563	0	0.76392	37.095	21.971	41.513	19.945	15.422	49.937	3.9724	60.801	11.372	2.0783	16.291	18.151
0	0	0	0	0	1.5554	1.1044	0	0	17.056	8.0619	13.127	55.903	0	0	5.3874	0	0.07601	28.652	0	36.193	0	0	27.355	0	20.144	25.055	0	7.4681	5.6181	0	3.6631	37.37	26.706	43.257	15.247	12.497	47.559	0	60.604	12.937	5.2526	16.833	22.747
0	0	0	0	0	0.39532	5.9136	0	0	15.07	8.5279	10.345	54.251	0	0	3.666	0	3.4026	27.704	0	30.737	0	0	24.47	0	21.231	22.692	0	7.0639	5.303	0	3.7728	32.988	24.477	44.921	8.8735	9.1552	46.069	0	61.469	11.696	5.6865	14.278	21.356
0	0	0	0	0	1.7869	5.058	0	0	13.733	7.1939	11.772	53.61	0	0	1.5849	0	6.0671	28.321	0	30.291	0	0	25.859	0	22.402	22.516	0	12.84	1.4804	0	2.4047	34.145	26.265	38.916	14.112	12.15	45.359	0	57.045	11.956	3.7184	13.41	19.79
0.0999	0	0	0	0	0.65697	5.4073	0	0	12.397	7.9538	11.666	52.37	0	0	2.1293	0	4.8169	25.642	0	29.497	0	0	22.636	0	22.75	21.903	0.51677	12.338	5.3492	0	11.885	32.091	25.327	41.063	17.448	9.0196	43.707	0	56.374	11.824	2.9076	14.397	19.361
0	0	0	0	0	0.22837	6.2353	0	0	9.7333	8.0011	11.219	51.644	0	0	7.3656	0	3.121	30.264	1.5165	33.872	0	0	23.274	0	25.904	24.025	0	8.4115	8.9216	0	11.275	35.414	25.051	40.369	15.773	6.608	46.757	1.0492	55.121	12.544	9.5227	17.74	21.29
0	0	0	0	0	3.3138	5.4024	0	0	8.1785	8.9959	11.055	49.834	0	0	9.0092	0	0.79759	29.34	2.6351	32.122	0	0	20.262	0	24.929	24.63	0	8.4685	10.942	0	15.423	39.789	26.739	44.494	14.366	8.1341	42.715	0	53.48	12.994	14.096	19.096	22.265
0	0	0	0	0	0	6.8823	0	0	7.6339	9.0201	10.311	49.017	0	0	15.824	0	0	30.802	0	30.28	0	0	17.956	0	32.791	24.778	0	12.949	2.8533	0	16.81	42.158	26.699	45.401	19.764	9.3109	40.55	1.9685	52.197	11.438	14.698	18.449	21.258
0	0	0	0	0	0	11.1	0	0	7.1694	8.632	11.115	47.5	0	0	17.478	0	0	32.493	0	28.505	0	3.8947	16.67	0	31.293	24.61	0	11.583	0.24062	0	16.235	44.632	29.615	48.124	13.54	4.9599	41.557	0.33669	51.236	12.724	20.948	13.03	20.857
0	0	0	0	0	2.2826	19.774	0	0	5.2127	8.3277	9.3106	45.568	0	0	16.871	0	0	30.083	0	25.632	0	4.34	20.393	0	27.891	24.705	0	8.7053	0	0	18.683	47.451	28.339	43.948	15.189	6.4793	41.344	0	49.048	10.948	19.215	10.547	16.991
0	0	0	0	0	2.2466	25.61	0	0	3.6663	9.0288	9.0705	45.8	0	0	14.265	0	0	33.037	0.77152	25.485	0	4.081	19.777	0	34.705	25.058	0	13.469	0	0	15.847	43.835	29.902	43.656	14.749	4.1471	40.069	0.80568	47.554	12.282	18.206	12.787	17.898
0	0	0	0	0	7.3323	26.359	0	0	2.8574	8.6035	6.9081	43.938	0	0	11.269	0	0	34.304	0	27.192	0	5.0338	16.709	0	24.912	25.263	0	9.7731	0	0	15.124	41.167	32.19	44.4	11.146	1.6945	40.964	0	45.917	10.576	17.051	15.229	18.077
0	0	0	0	0	5.4484	32.085	0	0	1.4005	8.9384	8.6397	43.354	0	0	7.1414	0	0	33.741	0.056096	26.779	0	1.0201	18.282	0	24.33	22.748	0	11.768	0	0	18.215	38.919	31.037	45.019	15.281	2.6239	39.626	0	43.684	8.914	17.086	14.464	18.341
0	0	0	0	0	5.6975	28.005	0	0	1.9444	7.9185	7.1711	42.209	0	0	7.0958	0	0	36.167	0	28.861	0	6.929	16.234	0	25.499	24.065	0	11.44	0	0	21.888	38.527	28.138	44.483	12.87	1.9605	39.285	0	43.29	6.1803	18.798	12.48	16.711
0	0	0	0	0	6.2325	30.603	0	0	1.2709	7.3324	6.1778	41.414	0	0	8.256	0	0	30.716	0.78027	27.814	0	3.2135	14.997	0	26.419	23.766	0	11.253	0	0	24.978	33.007	25.125	42.746	13.161	0.82989	39.508	0	41.538	10.811	13.948	17.758	17.064
0	0	0	0	0	5.8922	27.989	0	0	0.65761	8.8582	5.5068	39.982	0	0	3.7821	0	0	32.135	1.0253	26.248	0	4.7899	11.4	0	24.262	22.672	0	13.094	0	0	35.447	37.62	24.783	44.222	12.595	4.3393	37.047	0	40.622	10.13	21.51	16.321	16.58
0	0	0	0	0	5.3348	27.822	0	0	4.2193	8.2039	6.3988	39.014	0	0	6.5713	0	0	30.591	0	26.223	0	9.8833	12.734	0	24.968	23.1	0	13.155	0	0	34.035	37.181	21.123	42.787	17.339	0.55308	37.373	0	37.896	13.568	16.972	16.166	14.854
0	0	0	0	0	3.7351	26.178	0	0	7.4629	8.635	5.098	38.216	0	0	1.2013	0	0.042372	31.968	0	24.222	0	8.2962	12.935	0	18.019	23.183	0	12.685	0	0	34.833	39.542	22.899	42.824	12.824	0	35.247	0	38.75	12.083	15.044	19.564	16.13
0	0	0	0	0	6.7687	23.868	0	0	8.0939	7.3422	4.2245	37.325	0	0	3.8668	0	0	28.758	0.3058	23.402	0	8.0152	13.443	0	20.038	21.65	0	10.263	0	0	30.548	39.06	22.575	42.174	14.69	1.5396	36.546	0	37.958	12.984	11.797	17.235	16.489
0	0	0	0	0	6.0492	23.992	0	0	11.157	9.3499	5.7932	37.024	0	0	8.0338	0	0	26.815	0	23.316	0	3.8581	13.489	0	18.626	20.395	0	14.199	0	0	27.097	26.684	20.96	41.833	14.46	0	33.548	0	35.287	8.4242	11.072	17.837	16.02
0	0	0	0	0	2.3434	19.559	0	0	11.535	5.6958	7.5558	36.191	0	0	3.7953	0	0	27.284	0.43685	26.288	0	2.6154	20.371	0	17.437	21.665	0	8.2438	0	0	27.111	28.759	17.058	36.278	19.827	2.0952	37.257	2.8012	35.379	11.777	9.5645	14.045	14.615
0	0	0	0	0	2.2987	17.784	0	0	12.171	8.6142	5.8592	35.702	0	0	2.8653	0	0	28.978	6.3594	29.632	0	6.0129	20.938	0	35.799	21.939	0	8.1028	0	0	26.245	27.002	14.788	34.154	21.292	2.9603	39.498	7.4743	33.406	10.228	12.153	16.753	13.499
0	0.13742	0	0	0	3.9506	14.175	0	0	14.407	7.5714	6.8303	37.778	0	0	2.6495	0	0	28.112	3.5459	30.687	0	0	25.153	0	36.136	21.493	0	9.2264	0	0	26.743	25.832	19.95	35.959	22.196	1.6001	38.682	6.2925	35.258	11.664	6.6101	19.288	12.526
0	0	0	0	0	3.6567	15.825	0	0	15.076	8.6662	8.4246	38.576	0	0	4.4401	0	0	33.818	2.5776	29.207	0	1.6924	25.325	0	45.359	20.174	0	6.9289	0	2.0262	30.437	24.963	24.543	38.364	28.422	4.3148	34.849	0	37.361	9.1202	5.6724	20.98	14.379
0	0	0	0	0	5.2039	15.614	0	0	14.356	9.4978	7.292	38.155	0	0	11.27	0	0	33.746	0.23381	28.205	0	1.0155	27.599	0	55.27	21.339	0	8.9839	0	0	35.718	24.827	20.586	35.136	30.045	1.8282	33.852	6.1628	37.366	10.905	5.6288	25.795	13.16
0	0.021495	0	0	0	3.902	14.307	0	0	14.233	10.886	8.1144	37.898	0	0	8.9666	0	0	32.253	4.4423	27.725	0	2.2829	30.633	0	59.051	20.73	0	9.8894	0	0	34.081	31.743	21.144	34.428	27.96	2.9148	34.302	6.3904	37.134	10.911	6.3883	22.324	15.861
0	0	0	0	0	4.7796	10.904	0	0	11.963	9.0265	7.4392	39.027	0	0	14.762	0	1.0093	37.981	3.4318	31.073	0	2.1866	29.317	0	65.964	22.802	0	9.5792	0	2.1713	25.306	24.997	23.105	33.234	33.106	6.7301	37.349	6.9019	37.593	12.688	3.4366	22.885	17.718
0	0.1963	0	0	0	4.2995	11.711	0	0	10.816	11.326	7.7802	40.605	0	0	22.124	0	0	43.421	1.6095	31.119	0	0	33.108	0	71.355	23.981	0	10.573	0	0	35.828	33.645	25.531	32.933	37.671	10.223	33.475	10.854	39.339	11.143	7.2321	25.111	16.43
0	0	0	0	0.86902	4.5513	13.42	0	0	8.7742	13.422	6.8198	44.215	0	0	26.178	0	7.0589	43.999	3.6153	34.604	0	0	36.696	0	69.265	23.881	0	14.092	0	6.3218	32.408	45	25.745	32.442	46.326	15.778	35.044	20.088	41.151	14.164	6.5614	25.156	18.566
0	0	0	0	6.1308	7.073	11.42	0	0	10.757	12.063	8.3719	46.912	0	0	24.937	0	1.7437	42.75	1.8881	34.292	0	0	40.052	0	74.454	25.379	0.48491	11.071	15.134	2.8634	43.73	51.366	24.851	33.488	48.247	14.182	33.929	21.689	44.912	15.892	5.9283	24.287	17.541
0	0	0	0	10.426	4.4587	8.4175	0	0	10.79	13.709	9.8755	48.041	0	0	23.16	0	1.2848	41.723	4.2684	35.169	0	0	41.457	0	73.029	25.976	0	17.57	22.518	6.8684	50.789	54.191	24.429	35.596	45.734	12.888	33.239	14.89	44.882	12.655	4.0654	22.829	20.373
0	0	0	0	16.513	4.6993	9.3903	0	0	10.983	11.809	7.9217	48.047	0	0	26.631	0	3.7083	40.039	4.0308	35.779	0	0	41.104	0	74.293	25.931	0.17775	11.269	40.702	5.1251	52.17	56.446	22.809	33.661	45.231	16.377	34.666	21.64	45.406	16.457	8.8595	24.017	19.844
0	0	0	0	24.475	3.1834	10.81	0	0	11.764	11.688	7.3986	48.147	0	0	28.336	0	5.6094	37.978	2.0089	35.393	0	0	45.502	0	82.494	26.143	0.14181	11.754	46.902	2.7039	51.673	58.664	22.191	28.09	48.222	18.971	34.095	23.376	48.614	14.478	11.012	25.576	21.401
0	0	0	0	26.059	2.1298	8.536	0	0	9.2212	12.831	8.3447	48.996	0	0	26.956	0	2.5196	31.152	2.4622	33.073	0	0	43.008	0	76.265	25.703	0.66089	15.034	48.078	3.1047	50.912	58.767	14.982	32.871	43.914	15.301	29.959	15.956	51.344	13.293	7.4068	23.819	18.912
0	0	0	0	29.478	1.8186	8.2555	0	0	8.4219	10.668	6.0309	48.964	0	0	26.86	0	0	33.628	2.6371	35.594	0	0	41.257	0	77.68	26.435	0	11.698	54.54	0	55.018	62.162	17.604	28.98	46.105	16.602	31.646	21.486	56.515	16.575	2.3879	21.56	19.501
0	0	0	0	29.634	1.8582	7.8634	0	0	6.7614	13.798	7.3207	48.979	0	0	27.143	0	3.0544	32.028	1.134	32.223	0	0	42.68	0	77.983	26.323	0.70844	11.217	50.804	6.5526	57.683	68.4	15.853	32.123	55.486	16.404	28.405	16.905	60.109	15.651	2.4513	18.818	28.226
0	0	0	0	35.411	0	10.21	0	0	9.2197	14.059	5.8183	51.384	0	0	26.305	0	1.8449	29.071	7.5251	34.697	0	0	45.337	0	81.704	26.953	0.8328	15.786	57.057	0	58.064	65.891	18.765	27.402	60.705	15.924	32.23	22.875	68.64	18.447	0	22.694	28.279
0	0	0	0	40.176	0	9.3159	0	0	5.9288	13.744	5.3072	51.61	0	0	23.044	0	3.3197	31.253	1.9192	33.615	0	0	46.67	0	79.403	26.309	0.84144	9.8391	62.309	3.6795	66.01	68.123	14.388	28.539	61.447	20.086	30.735	22.307	71.319	17.166	3.2086	21.274	29.103
0	0	0	0	41.368	0.36015	10.451	0	0	6.3744	14.053	6.0225	51.584	0	0	19.475	0	10.215	28.551	2.7373	32.644	0	0	45.478	0	77.983	28.54	2.7348	13.96	62.678	0	63.575	66.453	15.345	24.792	63.834	19.542	27.902	20.95	73.62	18.242	2.2824	22.212	29.62
0	0	0	0	50.391	0	7.4879	0	0	6.5527	12.49	4.4413	52.173	0	0	25.782	0	3.6102	26.78	3.8996	36.446	0	0	52.119	0	79.956	26.762	2.0655	8.9163	73.331	0.0077232	69.065	63.617	11.554	25.802	65.428	20.668	28.92	23.695	73.59	21.05	2.4694	23.297	25.224
0	0	0	0	62.719	0	7.0466	0	0	4.1952	14.57	4.7259	51.776	0	0	36.007	0	7.0926	22.668	3.9676	34.337	0	0	65.68	0	76.287	25.267	5.8781	17.826	73.102	8.9346	71.616	59.26	13.364	29.311	60.11	18.822	27.814	30.048	73.716	16.733	0	20.822	23.352
0	0	0	0	76.847	0.35343	6.6167	0	0	5.2704	14.392	4.8252	51.598	0	0	50.212	0	3.8674	22.434	0	34.779	0	0	75.25	0	79.134	26.746	1.5737	15.178	76.42	2.667	75.135	53.848	10.235	29.808	66.112	20.199	25.5	28.904	72.409	13.826	0	20.639	24.403
0	0	0	0	81.885	0	8.5098	0	0	3.5103	17.924	7.2286	51.802	0	0	58.592	0	6.1032	23.134	4.953	34.092	0	0	77.945	0	80.948	28.345	0.88598	15.49	73.154	3.6029	84.145	55.489	9.0552	31.995	70.418	21.272	22.61	22.425	73.279	11.546	0	18.409	24.105
0	0	0	0	79.687	0	7.2408	0	0	2.6783	17.441	5.236	50.922	0	0	60.508	0	3.2513	19.6	0.76521	30.713	0	1.422	75.564	0	78.755	28.892	1.7571	17.108	70.346	4.6691	80.645	54.112	7.1956	35.242	66.478	20.077	20.435	12.879	72.851	12.466	0	15.487	20.511
0	0	0	0	83.179	0	12.187	0	0	3.7465	15.822	5.414	50.717	0	0	61.838	0	4.4772	19.984	2.5813	32.931	0	2.4648	72.049	0	83.159	28.871	1.9184	9.4557	79.61	1.2039	80.975	50.112	10.984	28.843	69.458	18.503	24.215	18.675	74.71	11.923	0	19.604	20.237
0	0	0	0	82.851	0	12.098	0	0	2.7242	15.158	6.5761	49.125	0	0	58.475	0	4.1186	20.58	1.1225	30.993	0	0.41701	75.795	0	82.5	27.886	2.2337	12.996	79.457	0	82.248	43.272	8.4892	31.377	64.755	15.284	20.604	13.839	71.667	8.8678	0	18.027	19.888
0	0	0	0	83.129	0	7.6098	0	0	3.4263	14.833	3.7553	47.78	0	0	55.374	0	10.332	23.959	2.3977	31.919	0	0	68.722	0	80.328	31.122	0.32413	6.2655	79.78	0	81.978	45.138	10.385	25.209	68.386	16.375	19.552	14.003	71.125	16.355	0	18.573	19.265
0	0	0	0	83.958	0	8.9136	0	0	2.7459	13.686	3.5636	47.483	0	0	57.049	0	9.1969	28.52	3.5057	31.688	0	0	69.518	0	74.275	31.453	0	12.222	75.592	0.25686	85.391	42.585	13.997	27.43	69.873	15.488	19.172	14.358	70.372	11.263	0	19.364	22.427
0	0	0	0	83.128	0	8.0067	0	0	2.4244	13.655	2.9737	48.173	0	0	57.993	0	4.726	27.794	0.046813	33.864	0	0	71.753	0	72.617	32.009	0	7.6042	80.453	5.5774	84.624	40.627	14.408	26.003	67.018	14.588	18.172	16.874	72.212	14.758	0.71924	18.283	21.1
0	0	0	0	81.755	0	4.9996	0	0	1.9458	12.798	4.3793	47.859	0	0	56.312	0	8.0155	29.374	0.39863	32.452	0	0	71.694	0	76.771	33.518	0	9.3941	81.07	6.3719	83.847	42.355	15.068	26.364	63.783	12.126	17.258	17.958	70.295	11.221	0	20.151	20.557
0	0	0	0	82.165	0	8.0077	0	0	3.1999	13.997	2.6463	48.009	0	0	52.68	0	4.3147	27.693	1.4495	32.771	0	0	70.183	0	70.411	30.539	0	13.651	84.319	5.9166	85.873	41.511	14.765	26.521	66.379	13.485	15.889	20.332	71.434	11.033	0	19.885	21.823
0	0	0	0	85.812	1.7746	6.9187	0	0	2.667	16.172	3.3047	50.981	0	0	53.936	0	6.1427	23.879	1.661	32.497	0	0	70.013	0	82.77	32.744	0	10.015	74.763	0.75823	88.6	40.191	14.778	25.799	68.849	14.651	16.613	19.982	74.337	13.591	0	21.215	19.762
0	0	0	0	87.252	8.3384	5.3052	0	0	2.2549	13.287	5.6557	54.37	0	0	60.707	0	4.3212	22.065	0.69816	33.815	0	0	72.681	0	85.261	34.103	0	13.743	76.663	2.1969	83.376	49.811	12.116	23.835	73.375	16.472	17.309	26.364	76.046	18.263	0	20.581	20.259
0	0	0	0	89.462	11.376	7.5348	0	0	3.0401	13.748	6.4584	57.498	0	0	60.052	0	5.7137	21.227	5.6671	34.077	0	0	76.627	0	79.498	31.428	0	18.747	76.105	0.55168	80.938	54.266	14.338	23.843	72.56	17.678	15.07	31.426	77.194	17.789	0	21.609	22.241
0	0	0	0	90.526	10.119	2.0259	0	0	2.4197	12.185	7.9498	59.843	0	0	56.876	0	11.006	28.489	6.7942	35.818	0	0	83.857	0	83.992	31.01	0	16.525	73.691	0	77.071	61.126	11.422	22.688	72.806	20.914	17.153	30.767	81.33	17.418	0	25.078	21.212
0	0	0	0	93.408	8.3357	1.6509	0	0	1.7664	13.052	7.1067	59.846	0	0	56.912	0	5.573	25.089	3.2913	32.764	0	0	89.118	0	81.591	28.442	0	13.623	64.84	3.2255	72.967	62.635	13.38	24.498	70.838	18.402	14.09	32.702	80.596	19.386	0	18.984	19.034
0	0	0	0	92.585	10.111	2.5359	0	0	1.5645	14.25	6.5069	59.004	0	0	55.068	0	12.636	24.529	3.5311	30.804	0	0.86344	89.407	0	83.873	29.039	0.86613	14.296	67.202	4.7581	69.482	67.709	14.592	21.497	70.721	17.861	13.363	31.821	81.402	20.753	0	22.401	19.96
0	0	0	0	95.048	7.3303	2.8633	0	0	2.8546	14.084	5.3409	58.556	1.2769	0	57.267	0	12.792	25.771	7.6623	31.113	0	2.2146	87.474	0	81.147	27.933	0	9.3554	61.366	0.075999	69.233	63.591	11.985	18.411	72.765	20.818	14.149	33.412	81.906	18.037	0	21.076	18.553
0	0	0	0	96.36	7.7523	2.6944	0	0	1.8995	13.915	8.426	57.94	3.6005	0	60.253	0	5.8094	22.722	11.34	30.039	0	0	92.439	0	85.218	27.45	0.15782	11.11	64.858	1.9499	69.717	69.159	10.065	20.903	67.493	18.613	13.235	27.233	82.757	14.932	0	21.379	18.864
0	0	0	0	99.097	3.9454	1.2433	0	0	3.1415	12.744	6.2575	56.654	4.6102	0	54.481	0	3.4548	22.456	4.9068	29.789	0	0	98.96	0	82.056	27.916	0	16.301	62.14	2.0693	65.988	67.729	7.111	17.426	68.517	15.869	11.354	33.478	79.267	18.506	0	21.497	17.592
0	0	0	0	96.154	4.1349	2.7074	0	0	2.6183	11.572	4.7438	57.422	2.4125	0	59.28	0	4.6176	22.282	8.7093	30.836	0	2.1428	97.66	0	74.781	27.967	1.2633	17.502	60.142	7.4153	72.934	64.128	10.01	19.478	67.574	18.022	13.907	32.478	79.496	19.496	0	19.657	19.718
0	0	0	0	95.015	3.9828	2.1052	0	0	1.4081	12.813	7.8078	55.994	4.8126	0	56.416	0	1.7108	22.77	4.6828	30.127	0	0.67445	100	0	65.606	25.546	0	23.288	54.559	7.8932	70.722	58.253	8.5786	26.443	70.05	15.108	10.26	31.574	78.526	9.8584	0	21.367	24.714
0	0	0	0	94.858	5.4961	3.0283	0	0	2.5832	14.852	4.2579	55.309	5.4664	0	52.081	0	5.9888	22.256	8.8994	33.572	0	0	97.54	0	71.38	27.252	0	24.827	56.583	0.91814	77.257	58.806	10.521	26.989	71.838	13.74	9.3094	31.839	78.055	13.988	0	22.416	22.381
0	0	0	0	95.669	3.9503	2.1406	0	0	2.8518	16.088	2.9333	54.735	3.3041	0	48.342	0	3.9502	19.665	8.5403	33.264	0	0	93.724	0	68.509	26.017	0	26.779	52.926	4.4994	80.285	60.05	7.6823	26.788	74.085	11.872	9.8271	28.045	77.007	15.533	0	20.502	24.586
0	0	0	0	94.998	0.39913	0.52747	0	0	3.2141	14.378	4.8871	54.044	0.96861	0	46.043	0	5.7494	19.529	7.0798	34.253	0	0	85.059	0	74.224	27.337	0.98675	12.326	51.461	0	83.678	58.399	4.5341	21.185	75.164	13.83	10.065	29.731	76.371	19.386	0	21.543	23.651
0	0	0	0	93.418	0	1.8933	0	0	3.0658	12.874	1.1925	53.339	0	0	37.517	0	5.3874	20.038	12.876	33.189	0	0	81.702	0	72.732	27.181	0	8.3976	43.983	1.8558	82.421	62.86	2.0761	17.568	74.717	14.055	11.275	23.818	74.146	17.736	0	23.306	24.654
0	0	0	0	94.459	0.71384	2.6365	0	0	2.6266	13.731	5.8524	52.598	0.44262	0	38.05	0	3.9139	17.746	7.0463	30.788	0	0	78.55	0	74.024	28.216	0	10.91	52.09	0	78.195	62.102	6.3404	19.737	72.458	11.542	8.8013	30.536	75.661	12.265	0	19.355	21.532
0	0	0	0	95.049	0	3.3005	0	0	3.0413	14.064	2.1534	51.979	2.9296	0	34.084	0	1.0019	15.766	11.03	29.826	0	0	80.207	0	72.388	26.111	0	12.414	48.944	0.022243	72.562	57.995	3.5078	19.668	69.669	12.331	8.6632	24.605	76.279	17.356	0	21.827	21.448
0	0	0	0	93.548	0	2.3965	0	0	1.5313	13.584	3.2435	51.782	5.1494	0	28.765	0	3.9355	19.302	7.2709	28.991	0	0	80.441	0	68.261	26.321	0	6.7335	47.665	0.0020387	73.201	53.508	3.5495	18.878	67.353	13.238	8.4136	26.163	75.903	16.562	0	22.668	23.575
0	0	0	0	93.031	0	3.7338	0	0	1.2945	13.791	2.8911	51.601	5.2566	0	26.893	0	7.5677	17.006	10.907	28.406	0	0	75.9	0	68.174	26.806	0	11.734	44.997	1.5144	73.992	53.489	7.5129	18.137	63.739	12.243	8.0108	24.262	76.133	11.798	0	14.587	21.569
0	0	0	0	90.972	0	1.1959	0	0	2.5662	13.214	3.8029	50.311	4.8311	0	25.683	0	3.3263	19.243	7.3967	26.211	0	0	72.843	0	64.861	26.629	0	9.7088	41.19	0	77.584	52.387	3.7863	18.327	61.236	8.0023	6.1182	20.016	77.066	13.021	0	16.15	20.472
0	0	0	0	86.946	0	2.1487	0	0	0.68743	13.816	2.6113	49.416	6.2693	0	21.418	0	3.1167	17.274	4.2242	25.326	0	0.28409	76.799	0	67.263	24.435	0	17.06	33.03	4.8384	75.511	48.614	7.1793	21.807	61.585	7.8728	4.4482	16.369	74.278	12.239	0	14.471	20.133
0	0	0	0	88.715	0	1.8643	0	0	1.9185	15.572	5.1648	48.071	3.7933	0	22.499	0	2.2567	15.213	2.8752	25.116	0	0	71.848	0	57.564	24.892	0	13.506	30.749	0	81.442	48.193	3.9686	21.894	63.613	10.242	3.204	15.085	70.559	7.8651	0	13.329	22.191
0	0	0	0	92.453	0	1.2128	0	0	0.37731	13.606	3.9551	48.286	4.8224	0	20.31	0	3.3672	13.404	7.1045	25.66	0	0	69.211	0	64.449	28.728	0	19.284	36.032	2.6496	83.121	49.488	4.2433	21.96	63.117	10.71	3.5689	14.17	73.501	10.337	0	17.029	22.971
0	0	0	0	93.766	0	3.075	0	0	2.0578	13.49	3.4836	48.015	2.4873	0	19.544	0	1.4887	12.415	1.3345	23.906	0	0	72.52	0	70.957	28.017	0	20.618	28.097	1.0774	80.847	48.832	4.5671	22.707	60.903	12.371	5.7879	16.309	73.603	10.721	0	14.7	22.705
0	0	0	0	95.12	0	1.303	0	0	2.3738	11.229	4.9409	47.878	0.76703	0	16.716	0	1.4133	12.076	1.6496	25.754	0	0	67.575	0	75.896	29.714	0.19049	18.352	31.061	0	83.105	52.899	2.9607	18.649	59.055	13.746	5.5001	18.297	72.005	15.41	0	14.364	18.684
0	0	0	0	93.55	0	4.0593	0	0	0.11263	12.327	5.0653	47.757	1.21	0	17.137	0	0	10.607	0.77345	25.712	0	1.1386	68.306	0	73.632	27.198	0	20.209	29.474	0	78.08	48.29	3.6605	19.806	58.369	11.653	2.8694	16.034	72.795	13.512	0	14.751	16.458
0	0	0	0	94.889	0.2294	2.3924	0	0	1.679	12.029	4.0276	47.374	0	0	23.822	0	2.6413	11.191	2.5926	29.252	0	0	68.041	0	73.881	30.641	0	11.493	28.623	0.89358	85.314	54.03	2.3792	19.079	57.765	12.484	4.6021	18.72	70.705	14.715	0	16.643	19.459
0	0	0	0	94.5	2.8213	1.9921	0	0	0.75507	11.882	4.6824	47.282	0	0	23.013	0	3.0858	8.6552	0	31.809	0	0	66.748	0	67.868	28.868	0.67027	13.241	21.271	0	82.604	51.537	1.5357	22.775	58.347	10.915	3.3977	17.66	73.209	17.049	0	18.577	17.476
0	0	0	0	97.934	3.8257	1.4402	0	0	2.8952	14.595	6.2215	47.955	0	0	34.264	0	0.16011	10.683	5.1588	36.436	0	0	66.336	0	74.856	30.957	2.149	16.339	20.705	0	87.823	57.056	1.587	23.089	68.114	14.234	4.3536	19.114	71.403	21.068	0	17.676	22.991
0	0	0	0	98.867	2.4936	0	0	0	0.95461	15.843	6.2586	47.936	0	0	37.124	0	4.2746	5.9223	4.8156	38.888	0	0	67.677	0	75.106	32.498	0.048031	15.337	28.123	0	85.626	62.736	0	25.897	65.721	18.131	4.1624	24.01	71.928	19.75	0	25.973	24.377
0	0	0	0	99.616	3.7268	1.3031	0	0	0.47594	13.1	6.1206	49.411	0	0	40.86	0	5.1541	5.6574	1.4169	39.254	0	0	66.816	0	74.802	36.004	1.9476	17.866	27.93	0	88.76	60.566	0	23.793	68.566	20.185	4.2897	17.984	71.267	22.516	0	22.062	27.015
0	0	0	0	100	6.6879	0.93621	0	0	2.6245	14.533	6.7666	49.442	0	0	38.61	0	8.989	8.3454	0	39.754	0	0	66.982	0	76.554	37.666	0.21205	14.278	29.331	0	91.101	62.417	0	26.127	70.771	17.709	5.4782	21.354	72.902	17.88	0.75718	22.18	24.909
0	0	0	0	96.553	9.339	0	0	0	2.357	12.8	2.3733	48.572	0	0	34.236	0	3.0637	8.9837	0	40.168	0	0	67.418	0	80.38	34.903	0	13.347	25.364	0	90.276	56.781	0	25	67.293	17.365	2.6791	23.677	72.853	18.465	2.0945	23.074	25.112
0	0	0	0	97.737	9.7602	0.72356	0	0	1.0448	14.182	5.1172	47.494	0	0	33.187	0	0	6.0804	0	37.526	0	0	67.17	0	73.881	37.504	0	16.259	24.578	0.9104	89.502	53.292	1.6877	29.63	65.392	13.699	1.5307	20.281	72.913	16.081	2.6229	19.921	24.575
0	0	0	0	98.453	6.2809	3.4318	0	0	1.0086	10.756	4.33	46.314	0	0	33.37	0	0	5.3308	0	38.343	0	0	68.157	0	71.352	39.079	1.8933	19.161	22.02	0.035484	89.377	45.422	2.7048	28.561	69.187	14.871	2.0828	24.795	70.88	13.155	4.2374	18.872	22.043
0	0	0	0	97.014	11.226	3.5262	0	0	0.90781	14.536	3.6425	46.243	0	0	32.081	0	0	6.0941	0	40.474	0	0	67.067	0	69.08	36.962	1.3109	23.017	20.771	1.3881	92.474	51.305	0.92044	30.704	65.842	11.769	0	16.634	70.376	15.574	8.0357	17.195	25.69
0	0	0	0	95.174	12.094	0.46173	0	0	1.865	13.693	4.373	45.128	0	0	30.006	0	0	7.1884	0	38.561	0	0	69.756	0	71.761	38.021	0	15.397	20.683	4.491	91.76	50.406	0.63776	29.855	62.588	14.241	0	14.714	69.478	15.328	2.9479	19.118	22.739
0	0	0	0	94.612	9.8176	3.0903	0	0	2.5054	9.9721	1.5722	45.19	0	0	28.493	0	0	8.4166	2.0787	41.043	0	0	69.624	0	73.528	38.327	0	15.24	23.232	0	93.918	48.463	1.1292	26.749	60.59	11.57	1.1233	17.029	70.224	13.53	0.9155	16.137	20.782
0	0	0	0	94.062	10.547	0	0	0	1.2033	9.2897	1.9152	44.772	0	0	29.825	0	0	8.306	0.70103	40.055	0	0	71.601	0	69.411	38.38	0	16.068	19.883	1.841	88.443	44.958	0	24.645	62.262	13.406	0	16.353	66.774	13.201	1.9525	18.132	18.286
0	0	0	0	90.967	8.1491	3.3388	0	0	1.0155	9.3266	3.4296	44.512	0	0	27.509	0	0	10.444	1.2042	37.129	0	0	72.116	0	71.759	39.686	0	13.099	15.965	0.25774	88.342	38.053	0.18382	23.732	58.713	11.83	0.10199	12.943	66.729	9.1236	0.3144	14.697	16.252
0	0	0	0	89.877	11.531	4.0496	0	0	1.2017	10.593	2.3904	43.513	0	0	25.78	0	0	10.379	0	33.33	0	0	74.158	0	66.875	38.429	0	15.382	16.053	5.2655	85.958	43.632	1.9276	27.558	51.166	7.9313	0	15.017	66.698	11.556	2.0174	12.906	17.978
0	0	0	0	89.792	11.073	1.7905	0	0	1.4629	9.6774	2.4729	42.218	0	0	25.033	0	0	14.098	0	31.599	0	0	77.406	0	63.615	37.56	0	18.382	17.764	5.2391	90.759	40.124	3.7905	26.807	55.34	7.5819	0	12.3	66.9	8.4888	0	11.804	16.774
0	0	0	0	87.508	13.607	0	0	0	1.6996	10.285	2.8064	43.527	0	0	25.196	0	0	15.252	0	31.895	0	0	77.471	0	60.966	38.204	0	21.013	11.728	8.3055	93.084	41.445	2.017	28.458	55.274	7.1562	0	5.6197	66.82	6.8794	0.80791	10.322	18.877
0	0	0	0	88.924	12.042	5.0844	0	0	1.6068	9.1832	4.7199	42.911	0	0	22.663	0	0	23.024	0	34.105	0	0	70.858	0	62.607	38.818	0	15.097	11.41	2.1569	93.295	42.846	6.7817	24.6	57.224	10.628	0	19.313	65.594	12.803	0	17.461	16.802
0	0	0	0	88.827	7.4007	2.2734	0	0	1.2696	9.6506	2.6883	42.454	0	0	20.995	0	0	27.711	5.3194	35.058	0	0	65.613	0	68.415	41.141	0	10.6	13.95	1.7914	96.222	42.905	4.6899	20.621	61.308	9.771	0	8.3241	63.59	16.69	4.2818	21.292	14.34
0	0	0	0	90.651	8.837	3.0275	0	0	4.2648	10.298	3.8173	41.362	0	0	18.742	0	0	23.975	4.4773	34.699	0	0	67.147	0	61.391	39.394	0	7.9986	16.783	0	100	45.64	4.5407	20.767	58.014	9.9257	0.047614	9.0271	63.403	17.722	2.8012	14.373	13.97
0	0	0	0	88.792	6.4297	0.21847	0	0	1.3018	10.263	2.8749	40.776	0	0	21.163	0	1.5925	23.351	3.9015	32.888	0	0	69.406	0	63.124	37.256	0	14.161	20.082	0	95.789	43.246	5.3677	23.305	56.905	9.9344	0	10.449	65.741	19.206	1.8349	12.635	18.384
0	0	0	0	90.724	6.9233	3.0824	0	0	1.2457	12.141	3.9296	40.079	5.1213	0	22.874	0	0.18383	28.4	10.956	31.736	0	0	71.415	0	63.532	35.735	0	17.059	27.011	5.8264	94.626	43.872	11.195	23.644	52.809	9.2	0	11.32	65.409	15.108	0	16.455	14.173
0	0	0	0	92.989	6.7648	2.7748	0	0	2.6481	11.79	1.9411	41.007	4.1994	0	18.888	0	1.4306	34.763	12.792	32.576	0	0	65.556	0	63.634	37.015	0	15.199	35.134	0.79265	93.741	39.065	8.2487	19.14	55.099	12.028	0	10.425	64.424	19.906	0	16.669	14.894
0	0	0	0	93.302	5.7904	3.0575	0	0	1.8647	13.599	2.5431	39.393	5.7214	0	18.048	0	0.59263	35.633	10.704	31.86	0	0	66.535	0	57.366	34.352	0	12.639	35.73	1.1818	92.546	41.247	12.127	24.288	55.548	10.679	0	9.2715	62.408	16.613	0	14.105	14.551
0	0	0	0	90.847	3.6107	1.0529	0	0	3.6313	13.647	4.2204	38.511	6.7689	0	17.396	0	0	36.294	6.644	30.001	0	0	66.47	0	54.723	33.129	0	21.582	38.29	4.004	86.523	38.546	13.58	27.542	55.979	5.572	0	8.893	64.2	16.419	0	13.225	15.769
0	0	0	0	94.552	3.2813	0.82612	0	0	1.5955	10.902	2.3622	38.409	3.7831	0	17.865	0	0	34.993	14.502	32.267	0	0	62.223	0	56.628	33.347	0	20.359	45.326	2.4114	89.616	39.993	9.0415	17.091	62.802	8.9456	0	9.9687	61.8	18.52	0	12.355	12.294
0	0	0	0	95.194	1.7843	0.408	0	0	2.3129	11.418	2.9887	37.628	4.299	0	14.019	0	4.7294	34.321	12.102	32.07	0	0	61.892	0	51.184	32.589	0	22.765	39.61	0.43516	87.992	41.161	8.0735	14.138	60.091	10.854	0	12.044	58.318	19.664	0	15.222	13.25
0	0	0	0	94.933	0	1.6461	0	0	1.6675	11.039	2.8481	38.156	0.73529	0	10.835	0	0	35.244	7.1958	32.156	0	0	60.795	0	52.256	33.955	0	21.62	45.691	0	83.391	39.315	7.7235	13.446	62.763	9.448	0	11.521	60.564	18.197	0	18.23	14.286
0	0	0	0	94.015	0	0	0	0	2.8965	11.691	2.8602	37.863	1.007	0	12.275	0	3.7359	36.1	10.758	32.88	0	0	57.675	1.3765	56.72	35.167	0	21.058	38.391	3.3005	84.659	47.191	9.529	15.87	61.494	6.8486	0	10.889	60.634	18.649	0	19.018	14.447
0	0	0	0	90.777	0	0	0	0	2.6552	10.666	4.3971	37.291	1.9483	0	10.192	0	0	35.372	7.8214	32.944	0	0	57.122	0	52.92	34.691	0	23.909	35.821	0	84.42	46.595	12.931	21.682	55.177	7.4472	0	13.297	61.545	15.169	0	16.128	15.911
0	0	0	0	89.612	2.1672	0	0	0	3.0876	10.795	2.8389	37.464	0.17276	0	12.288	0	0	35.181	7.3856	34.805	0	0	56.615	0	64.037	35.247	0	24.356	31.002	0.90366	86.268	41.847	10.344	22.408	55.955	5.0878	0	7.0572	62.722	18.022	0	17.187	17.552
0	0	0	0	89.698	0.59094	1.6674	0	0	3.4561	8.8214	3.4022	36.911	0.14452	0	8.8827	0	0	34.105	7.6846	37.939	0	0	55.153	0	67.487	31.866	0	24.164	32.134	0.7291	86.051	37.135	8.6833	23.117	55.374	4.6121	0	16.541	61.411	18.21	0	15.617	12.651
0	0	0	0	88.502	0	1.1223	0	0	3.2027	9.439	3.8725	36.465	0	0	6.7526	0	0	38.105	7.4164	41.517	0	0	55.131	0	72.146	32.397	0	25.565	26.149	2.3781	84.619	43.617	9.5733	26.458	52.863	4.2513	0	15.225	59.094	19.958	0	16.562	13.089
0	0	0	0	87.428	0	2.8135	0	0	0.96725	7.7999	2.1173	36.031	0	0	5.9803	0	0	36.72	9.0262	43.175	0	0	52.013	0	68.258	31.959	0	30.269	29.37	1.536	81.6	35.529	9.3034	26.732	54.736	5.0115	0	14.416	58.426	16.599	0	16.946	14.129
0	0	0	0	85.774	0	0.80596	0	0	3.5952	9.1509	1.8326	35.394	0	0	11.544	0	0	41.256	7.9585	42.072	0	0	50.805	0	66.42	31.106	0	29.015	19.137	0	79.99	31.224	11.671	28.404	49.755	3.9412	0	18.495	58.991	16.085	0	17.789	15.127
0	0	0	0	83.618	0	1.7682	0	0	1.7046	7.4519	0.93602	34.911	0	0	6.0452	0	0	44.382	10.455	42.373	0	0	48.24	0	66.475	29.061	0	24.799	24.621	1.7378	80.574	35.092	12.843	25.817	51.387	5.9968	0	19.875	57.997	16.647	0	17.82	14.58
0	0	0	0	80.773	0	0.16934	0	0	2.1082	8.3237	1.29	34.388	0	0	7.3468	0	0	47.453	10.099	41.724	0	0	46.163	0	68.845	30.602	0	21.974	17.982	0	76.603	31.986	16.117	28.221	50.789	0.79248	0	12.773	59.089	19.291	0	17.519	16.681
0	0	0	0	79.163	0	2.7491	0	0	2.4005	9.095	1.1815	34.137	0	0	14.859	0	0	52.529	12.843	39.875	0	0	45.994	0	62.426	30.084	0	26.247	11.941	3.4349	78.066	33.31	21.265	33.385	52.881	3.6598	0	14.73	59.378	17.212	0	15.601	21.165
0	0	0	0	84.479	0	1.1675	0	0	2.8432	9.8641	0.45715	34.451	0	0	14.073	0	1.505	57.304	10.134	45.671	0	0	44.887	0	68.103	28.893	0	25.544	16.691	4.7423	84.49	33.403	19.283	28.732	58.81	4.6702	0	22.33	56.415	14.854	0	16.009	21.35
0	0	0	0	83.787	0	4.1025	0	0	3.6545	10.355	0.18483	34.288	0	0	16.245	0	0	57.547	11.339	45.908	0	0	43.874	1.494	70.082	29.669	0	22.854	15.534	7.5231	87.259	37.226	14.908	24.285	60.136	4.7003	0	18.85	54.739	17.063	0	17.1	21.755
0	0	0	0	82.532	0	1.3436	0	0	3.3919	9.1072	2.1024	33.303	0	0	17.531	0	2.6239	59.864	14.061	44.932	0	0	45.131	0	61.222	27.367	0	20.921	17.996	3.0805	96.974	47.456	19.841	29.424	62.424	4.8557	0	22.84	58.53	13.486	0	18.64	28.5
0	0	0	0	80.991	0	1.4264	0	0	1.9562	8.9123	1.9523	33.749	0	0	17.939	0	2.3015	59.986	12.825	44.937	0	0	40.851	0	64.007	28.881	0	19.884	10.411	2.4149	91.99	51.563	21.336	26.135	62.052	4.0542	0	22.508	55.836	17.095	0	21.257	27.635
0	0	0	0	78.46	0	0.89135	0	0	2.9856	8.8356	0.76469	33.583	0	0	18.419	0	0	56.808	14.034	48.351	0	0	41.949	3.714	60.166	28.967	0	22.159	11.403	2.6414	92.948	57.047	19.592	28.237	61.871	8.2104	0	21.93	55.449	19.369	0.71228	18.182	26.89
0	0	0	0	76.745	0.10585	0.99649	0	0	2.6903	11.232	1.6899	35.727	0	0	19.982	0	2.3579	58.393	12.081	49.189	0	0	44.987	3.322	62.634	30.273	0	16.932	11.637	1.1207	97.017	58.666	19.997	30.067	61.56	6.0099	0	20.297	55.83	18.956	0.22107	22.998	31.954
0	0	0	0	76.547	3.9788	1.3643	0	0	4.7289	9.9156	1.4269	36.156	0	0	22.269	0	0.35363	60.329	15.139	58.837	0	0	43.32	3.8153	58.226	29.211	0	22.822	8.7832	3.9766	86.97	62.795	16.422	32.542	68.92	5.5745	0	29.905	54.714	20.202	0.54796	21.147	31.356
0	0	0	0	75.646	11.015	0.9129	0	0	5.4799	9.8688	0.32362	36.847	0	0	23.185	0	0	60.407	12.71	62.802	0	0	42.798	3.7782	59.386	28.663	0	27.221	14.364	0	88.866	60.841	14.177	34.501	75.386	4.275	0	27.793	57.792	17.79	0	20.191	40.321
0	0	0	0	75.801	13.64	0	0	0	5.053	10.115	0	37.919	0	0	23.842	0	7.1592	56.363	15.512	62.235	0	0	42.362	2.7917	58.189	29.375	0	19.257	6.3395	0	92.351	63.814	15.489	35.423	79.869	6.3046	0	24.658	58.825	23.331	0	23.039	36.693
0	0	0	0	77.804	14.433	0.51221	0	0	3.9088	11.754	0	38.128	0	0	24.808	0	2.9475	55.098	16.314	60.383	0	0	43.78	3.3953	57.437	28.084	0	20.552	9.5239	0	83.546	64.703	15.764	35.358	75.982	4.0218	0	20.608	59.582	20.306	0	24.591	34.164
0	0	0	0	73.925	11.744	0	0	0	2.2479	15.069	0	37.302	0	0	25.107	0	4.5089	52.335	15.58	53.981	0	0	42.283	1.524	57.133	28.219	0	19.302	5.1542	1.2333	80.228	57.918	16.415	37.762	69.412	2.581	0	23.832	61.695	16.706	0	25.864	32.246
0	0	0	0	73.051	11.503	0	0	0	4.4983	11.25	0	36.892	0	0	18.353	0	3.9698	49.251	16.469	54.948	0	0	40.216	0.50477	58.06	28.914	0	21.865	6.8463	0	79.497	56.407	14.88	33.686	68.833	2.4282	0	19.245	58.86	19.158	0	23.117	29.811
0	0	0	0	72.512	12.518	0	0	0	3.9533	10.48	0	36.221	0	0	17.128	0	5.8214	49.801	14.213	53.151	0	0	41.85	2.2591	53.358	27.044	0	20.09	9.7326	0.84915	77.702	54.681	12.688	30.787	65.466	2.7225	0	19.2	59.047	13.45	0	22.123	27.266
0	0	0	0	71.444	9.2924	0	0	0	3.794	10.818	0	35.712	0	0	17.74	0	5.8827	45.11	17.68	53.201	0	0	39.016	2.7745	55.865	26.743	0	21.205	6.8519	0	74.398	52.027	11.387	31.938	61.393	0	0	14.497	58.937	20.024	0	22.199	25.709
0	0	0	0	68.503	6.8723	0	0	0	2.9033	9.7116	0	35.038	0	0	17.1	0	7.8578	44.426	14.797	49.822	0	0	39.76	0.58427	54.164	26.137	0	16.653	5.3252	0	75.516	48.928	10.542	29.348	58.835	1.0559	0	19.839	56.781	14.08	0	18.948	23.667
0	0	0	0	66.894	10.199	0	0	0	1.7575	11.908	0.66155	34.103	0	0	13.588	0	12.042	43.797	12.769	45.256	0	0	41.116	0	45.697	22.326	0	21.39	3.4415	0	68.529	46.524	18.42	36.297	57.803	0	0	16.236	60.875	9.5673	0	16.845	19.537
0	0	0	0	64.804	10.111	0	0	0	1.7027	10.848	0	33.982	0	0	12.073	0	8.7833	39.437	17.968	44.278	0	0	37.807	0	45.006	21.587	0	13.206	0	0	68.699	41.636	15.771	31.577	56.263	0	0	11.185	57.268	12.969	0	20.76	19.22
0	0	0	0	64.275	5.0194	0	0	0	2.0303	11.041	0	34.335	0	0	11.707	0	6.0998	41.413	19.027	45.865	0	0	35.87	0	41.391	22.748	0	15.935	5.8981	1.2824	71.774	41.598	14.542	30.745	54.132	0	0	12.392	57.152	13.507	0	21.588	17.099
0	0	0	0	63.411	7.1554	0	0	0	2.2743	10.04	0	33.84	0	0	14.49	0	6.362	39.129	16.459	47.614	0	0	39.558	0	48.009	21.591	0	17.392	5.4301	0	72.502	36.332	10.47	29.852	52.538	0	0	10.521	56.202	13.702	0	20.182	16.542
0	0	0	0	59.999	3.9878	0	0	0	2.0904	10.194	0.1846	33.083	0	0	14.203	0	9.3077	36.894	15.342	44.541	0	0	36.981	0	47.205	21.324	0	15.702	6.02	0	75.591	32.987	13.971	34.772	52.84	0	0	10.291	55.567	9.9333	0	17.828	9.7012
0	0	0	0	57.376	5.4516	0.35316	0	0	0.2904	10.295	0	33.304	0	0	12.866	0	13.875	34.999	13.534	43.671	0	0	36.616	0	41.748	20.319	0	22.748	2.9429	0	69.837	31.192	13.596	36.008	51.158	0	0	9.281	58.745	9.783	0	18.034	8.7626
0	0	0	0	57.067	3.2551	0	0	0	2.2304	8.6523	0.47719	32.794	0	0	15.127	0	19.356	30.144	17.354	44.223	0	0	36.432	0	37.144	21.31	0	30.567	5.8266	0	72.544	32.224	9.7834	34.816	47.053	0.1682	0	5.5136	56.54	14.104	0	19.349	10.003
0	0	0	0	55.563	3.6449	0	0	0	0.48312	7.3496	0	32.579	0	0	14.459	0	28.994	32.287	8.9584	40.845	0	0	34.439	0	49.66	20.394	0	34.792	4.8316	1.2177	75.227	22.719	15.283	37.595	48.609	0	0	8.4063	58.555	4.4996	0	23.363	9.8444
0	0	0	0	55.87	1.6863	0.063612	0	0	0.32187	8.1422	0	31.945	0	0	12.165	0	46.742	30.765	14.375	41.592	0	0	33.663	0	53.815	21.761	0	33.065	1.6935	0	71.391	19.631	14.337	33.441	48.635	0	0	9.1534	55.853	9.8878	0	18.782	10.022
0	0	0	0	52.977	2.3945	0	0	0	0.91465	8.1978	0	31.615	0	0	13.91	0	49.789	31.383	10.698	40.576	0	0	34.804	0	51.349	20.858	0	42.748	1.8424	0	73.367	24.894	12.465	36.015	40.808	0	0	7.5257	57.372	7.8019	0	21.534	8.4691
0	0	0	0	55.183	1.7588	0	0	0	1.8514	7.1922	0	31.155	0	0	15.318	0	55.481	28.67	17.705	40.875	0	0	32.554	0	54.503	19.308	0	34.143	3.8942	0.30453	71.599	19.06	7.4938	29.785	43.584	0	0	9.158	55.902	10.846	0	19.176	8.1728
0	0	0	0	51.484	0	0	0	0	1.6353	4.7202	0	31.052	0	0	15.842	0	57.968	28.96	8.7622	37.739	0	0	29.472	0	51.503	17.161	0	39.011	0	0	67.514	14.189	12.637	28.861	40.954	0	0	7.6455	56.716	4.4816	0	19.508	4.7435
0	0	0	0	50.531	0	0	0	0	0.63306	5.2517	0.10765	30.721	0	0	9.8408	0	66.429	26.492	11.543	38.839	0	0	26.937	0	48.375	19.967	0	33.516	1.9073	0	68.104	20.154	6.576	27.977	43.105	0	0	12.583	55.321	10.205	0	17.477	10.033
0	0	0	0	53.251	0.57893	0	0	0	1.3439	5.6323	0	30.749	0	0	14.603	0	52.498	29.451	8.2448	37.671	0	0	34.103	0	55.01	18.34	0	43.232	6.7014	0	65.14	14.257	14.736	31.952	43.401	0	0	17.172	57.535	9.7007	0	21.264	8.4473
0	0	0	0	54.199	5.2898	0	0	0	0	6.9779	0.01195	31.439	0.3789	0	16.891	0	51.095	30.453	2.197	37.218	0	0	32.955	0	55.947	17.511	0	49.86	0	0	68.56	16.723	12.833	31.626	47.458	1.653	0	19.769	59.094	11.122	0	18.683	9.7706
0	0	0	0	59.109	0	0	0	0	2.3501	5.8395	0.33074	32.041	0.15508	0	19.997	0	41.848	34.472	9.0783	43.311	0	0	33.472	0	55.976	18.971	0	50.005	0	0	73.915	25.367	7.405	30.024	49.69	4.8409	0	19.266	58.193	16.573	0	25.784	10.561
0	0	0	0	64.887	0	0	0	0	1.9749	10.034	0.56304	32.551	0	0	20.756	0	45.611	40.007	13.291	43.181	0	0	34.229	0	65.001	19.467	0	50.846	2.1642	0	70.982	26.278	12.255	31.141	52.323	3.3332	0	27.907	59.114	16.141	0	23.781	10.781
0	0	0	0	69.809	0	0	0	0	1.2213	11.462	1.7682	31.994	0	0	23.399	0	43.496	43.706	11.06	39.8	0	0	35.054	0	55.397	17.614	0	53.14	0	4.3993	73.085	31.515	18.213	33.57	56.541	6.3534	0	28.238	60.031	18.91	1.8012	23.577	10.375
0	0	0	0	77.276	0	0	0	0	3.7097	6.6935	0.98904	31.424	0	0	21.521	0	50.764	47.178	20.765	43.313	0	0	40.104	1.287	56.256	18.757	0	49.4	0	0	73.474	35.311	14.054	27.916	57.598	12.016	0	26.457	57.059	15.717	0	29.82	14.242
0	0	0	0	76.836	0	0	0	0	1.8116	6.3061	2.3298	31.604	0	0	25.192	0	67.211	48.705	13.944	42.585	0	0	37.493	0	63.317	19.395	0	47.177	0	0	71.197	28.513	12.375	27.9	54.669	7.2087	0	27.555	56.553	16.771	0	25.88	13.987
0	0	0	0	76.927	0	0	0	0	1.0402	8.3285	2.7086	30.615	0	0	21.934	0	77.382	43.603	12.102	37.66	0	0	37.078	0	60.704	17.637	0	44.843	0	0	73.357	30.33	20.895	28.625	47.66	4.2146	0	33.698	57.87	13.231	0	24.872	12.633
0	0	0	0	74.353	0	0	0	0	1.1139	7.3536	0.56975	30.719	0	0	22.502	0	80.587	43.832	12.546	39.209	0	0	35.85	0	56.28	17.933	0	40.767	0.39757	0	70.009	28.001	17.184	26.285	51.151	5.9009	0	26.739	56.254	15.484	0	24.755	11.568
0	0	0	0	74.23	0	0	0	0	1.9254	7.9725	1.4951	29.718	0	0	22.964	0	79.374	42.372	11.23	38.085	0	0	37.301	0	62.521	17.173	0	43.577	0	0	71.858	24.826	14.658	27.156	48.51	4.9523	0	22.351	56.521	14.717	0	22.073	9.0516
0	0	0	0	70.706	0	0	0	0	1.2572	9.2033	1.2269	28.742	0	0	19.433	0	79.449	38.998	9.7318	33.902	0	0	37.03	0	62.05	14.929	0	51.28	0	0.94333	66.137	19.822	16.657	30.888	49.347	2.4265	0	15.041	61.73	12.763	0	21.325	8.8945
0	0	0	0	70.65	0.26275	0	0	0	1.1722	5.8577	1.2041	29.273	0	0	20.069	0	65.221	40.694	14.12	36.893	0	0	33.047	0	66.703	16.962	0	34.207	0	0.050931	69.803	18.446	14.051	25.201	45.323	3.0651	0	16.058	55.906	11.784	0	23.263	9.0054
0	0	0	0	70.875	0	0	0	0	2.2614	8.0115	1.6393	28.723	0	0	22.967	0	64.95	39.533	10.476	32.727	0	0	31.936	0	66.964	18.478	0	32.843	0	0	68.176	15.808	17.486	26.022	39.715	0	0	16.567	58.194	11.675	0	21.585	8.0991
0	0	0	0	67.235	0	0	0	0	1.0146	6.7233	1.6425	28.225	0	0	20.671	0	57.264	37.633	7.903	33.003	0	0	34.544	0	60.178	17.104	0	36.534	0	0	58.215	17.172	16.215	25.725	43.801	4.0747	0	21.462	55.911	15.826	0	20.94	9.8584
0	0	0	0	62.154	0	0.30622	0	0	0	5.8812	0.49579	26.781	0	0	18.392	0	47.568	31.532	4.3483	26.494	0	0	37.802	0	63.153	15.574	0	42.895	0	4.5058	54.517	9.3808	20.365	34.703	38.506	0	0	10.176	56.468	12.35	0	17.805	13.157
0	0	0	0	63.723	0	0	0	0	1.4553	8.3248	0.80885	27.845	0	0	21.92	0	49.084	36.677	3.9267	32.372	0	0	33.269	0	59.424	16.099	0	36.664	0	0.73969	55.877	12.921	16.577	31.233	45.343	0	0	20.209	55.628	11.136	0	17.75	10.99
0	0	0	0	62.468	0	0	0	0	2.3887	6.3054	0.75269	28.373	0	0	28.843	0	46.127	39.953	8.9336	33.498	0	0	33.749	0	62.386	16.603	0	37.243	0	0	58.291	14.777	18.707	27.892	45.395	0	0	31.765	55.662	8.9856	0	22.799	10.914
0	0	0	0	63.191	0	0	0	0	2.7681	5.7508	1.5977	28.539	0	0	32.822	0	41.339	48.582	10.693	35.279	0	0	34.031	0	64.367	16.163	0	33.651	0	4.5845	60.353	15.393	23.382	26.78	46.51	0	0	31.669	55.41	12.754	0	21.357	11.774
0	0	0	0	63.694	0.21272	0	0	0	1.2629	8.0412	1.9012	27.365	0	0	36.065	0	38.331	48.38	13.724	34.835	0	0	32.766	0	59.641	15.839	0	37.042	0	0	64.202	21.054	21.084	26.556	49.587	2.7977	0	29.277	56.309	12.329	0	22.751	13.072
0	0	0	0	63.524	1.0935	0	0	0	1.7329	8.5381	3.7019	28.105	0	0	42.017	0	30.279	46.863	14.957	34.616	0	0	31.387	0	71.203	15.66	0	39.01	6.5464	0	62.674	22.807	22.483	25.666	51.729	0.5833	0	27.655	57.668	14.939	1.1007	24.278	15.855
0	0	0	0	62.7	1.7512	2.3206	0	0	2.0434	7.5489	4.1958	28.172	0	0	47.458	0	30.892	46.452	15.197	33.992	0	0	33.86	0	64.642	17.669	0	43.79	9.3454	0	63.186	21.71	24.05	26.986	53.847	1.1416	0	23.066	58.364	15.298	0	28.553	17.182
0	0	0	0	61.67	5.0168	0	0	0	2.1328	11.631	4.0656	27.309	1.6704	0	42.924	0	32.514	45.724	16.091	32.52	0	0	32.924	0	64.794	14.775	0	46.005	6.2248	0	61.783	17.574	22.809	27.89	50.953	0.0012018	0	11.831	55.43	15.347	0	22.257	24.08
0	0	0	0	62.975	0	1.5767	0	0	1.1203	8.6674	1.7672	27.527	0.59819	0	39.805	0	28.557	46.458	14.033	33.327	0	0	32.907	0	64.127	15.868	0	36.764	10.663	0	68.039	20.169	22.438	23.424	52.879	4.7821	0	16.84	56.818	13.714	0	22.21	21.728
0	0	0	0	61.433	3.3363	1.5974	0	0	0.46876	9.6031	4.2208	26.118	1.3897	0	38.166	0	22.563	45.855	14.049	28.83	0	0	33.659	0	64.134	14.951	0	33.123	5.1408	0	62.238	20.586	20.878	26.803	53.369	1.3682	0	6.186	56.633	13.253	0	25.978	21.792
0	0	0	0	60.604	0	2.232	0	0	1.9542	8.4579	1.3305	26.388	0.034056	0	35.128	0	20.957	45.494	12.457	31.3	0	0	30.105	0	64.566	15.98	0	28.82	9.5116	0	63.549	18.554	16.929	19.576	49.135	1.1535	0	20.381	54.862	16.396	0	21.164	20.377
0	0	0	0	60.84	0	0	0	0	1.5568	7.8712	1.9218	25.688	0	0	34.693	0	19.065	44.157	12.242	32.748	0	0	29.212	0	66.225	17.223	0	24.871	8.2563	0	70.651	23.864	16.105	20.778	46.288	0	0	12.741	52.841	16.228	0	21.472	21.266
0	0	0	0	59.824	0	0	0	0	1.1634	6.3986	1.0012	25.814	0.35311	0	29.474	0	15.474	44.891	11.861	33.776	0	0	30.027	2.2505	61.231	15.51	0	35.669	4.8795	0	71.791	25.324	16.696	22.412	49.147	0	0	16.751	51.266	18.07	0	24.43	20.651
0	0	0	0	59.101	0	0	0	0	2.0714	8.3519	0.44707	25.29	1.0752	0	28.725	0	17.868	44.767	14.163	32.181	0	0	29.625	0	56.991	15.451	0	30.47	8.0589	0	67.897	27.028	18.457	22.346	45.199	0	0	15.141	54.252	15.73	0	27.466	17.06
0	0	0	0	59.99	0	1.4117	0	0	1.712	7.8082	0.44887	24.704	2.4476	0	25.472	0	17.802	42.039	12.475	32.61	0	0	26.709	0	60.156	15.795	0	28.725	5.2447	0	66.706	25.252	17.872	21.097	46.847	0	0	11.137	51.403	14.912	0	21.212	19.87
[truncated: 1,950 more rows]

## Sheet: Panel C data
0.37793	0.20005	0	0	0	0	0	0	0	0	0	0	0	0.72314	1.246	0	0.37295	0	0	0	0.90255	0	1.8902	0	2.0551	0	5.1658	0	0	0	0	0	0	0	7.2894	0	0	0	0	0	0	0	0	4.1057
[truncated: 1,899 more rows]

[truncated: 3 more sheets: Panel A data, Panel B data, Panel I]
