# Supplementary material for: Activity dynamics of amygdala GABAergic neurons during cataplexy of narcolepsy
Source: eLife. 2019 Aug 14;8:e48311. doi: 10.7554/eLife.48311 (PMC6703899; doi:10.7554/eLife.48311)
Supplement: Figure 5—source data 1. [file elife-48311-fig5-data1.xlsx]

## Sheet: SC
	C1	C2	C3	C4	C5	C6	C7	C8	C9	C10	C11	C12	C13	C14	C15	C16	C17	C18	C19	C20	C21	C22	C23	C24	C25	C26	C27	C28	C29	C30	C31	C32	C33	C34	C35	C36	C37	C38	C39	C40	C41	C42	C43	C44
C1	1	0.463931	0.143539	0.186269	0.297457	0.389117	0.493278	0.831024	-0.231366	-0.22758	0.392013	-0.227717	0.607316	0.65055	0.546928	0.049744	0.748665	0.354862	0.222389	0.76855	0.338706	-0.00779305	0.827346	0.63984	0.66548	0.490013	0.341109	0.665149	0.34198	0.818812	0.462327	-0.317966	-0.427239	0.478612	0.215709	0.528904	0.294235	0.849614	0.674243	0.454894	0.303923	-0.0408149	0.550332	-0.105773
C2	0.463931	1	0.164655	0.336311	0.141542	0.220694	0.298704	0.407544	-0.0342442	0.0230322	0.0298619	-0.0204846	0.265802	0.303629	0.2873	0.11516	0.362369	0.080383	0.337092	0.410072	0.0946274	-0.073394	0.434761	0.30114	0.344947	0.25122	0.138632	0.258589	0.259918	0.499377	0.27417	-0.288669	-0.206959	0.252197	0.0470874	0.198261	0.323671	0.439836	0.311229	0.203817	0.299379	-0.0209594	0.330438	0.029114
C3	0.143539	0.164655	1	0.100862	-0.0674699	-0.0295932	0.150541	0.0593396	0.0763687	0.210722	-0.307198	0.0749778	-0.0845764	-0.0690805	-0.0754008	0.19164	0.215811	-0.146439	0.298299	0.0322436	-0.378091	-0.189295	0.0859556	-0.14095	0.159133	0.00523406	-0.310543	-0.208591	0.0958369	0.206476	0.050453	0.265671	0.064303	-0.308222	-0.259412	-0.259945	0.283944	0.0414995	-0.197803	-0.16011	0.161467	-0.170765	0.00171124	0.0724251
C4	0.186269	0.336311	0.100862	1	0.0470102	0.313935	0.0958219	0.184482	0.116014	0.0883835	0.0400373	0.0448013	0.064399	0.269844	0.145993	0.134861	0.223609	-0.0495037	0.191853	0.135938	-0.0144954	0.104063	0.220874	0.0102146	0.184825	0.128111	-0.0767412	0.09139	0.361692	0.22207	0.153432	-0.0362498	-0.0912218	0.158172	0.0538648	0.0166973	0.111277	0.20546	0.106024	0.0683096	0.136804	-0.102301	0.0364983	0.106512
C5	0.297457	0.141542	-0.0674699	0.0470102	1	-0.127428	0.161624	0.278792	-0.0906148	-0.219677	0.151561	-0.143669	0.302644	0.12876	0.0691039	-0.0875165	0.210706	0.185845	0.0606836	0.281899	0.0280435	-0.205964	0.243472	0.52631	0.235213	0.291269	0.0792427	0.280647	-0.0211624	0.36356	0.309195	-0.369109	-0.207694	0.189085	-0.0421418	0.246199	0.191915	0.368915	0.220301	0.128732	0.162865	-0.232389	0.359883	-0.454839
C6	0.389117	0.220694	-0.0295932	0.313935	-0.127428	1	0.143646	0.500962	0.0159154	-0.0783326	0.415968	-0.0389797	0.288858	0.458967	0.509339	0.0787807	0.364083	0.0461404	-0.0448932	0.32314	0.346754	0.333113	0.51246	0.154843	0.244623	0.159944	0.119664	0.444632	0.298951	0.405487	0.149833	0.0724667	-0.285067	0.28453	0.402863	0.370378	0.0469955	0.349203	0.359401	0.328841	0.0135495	0.045993	0.233946	0.148643
C7	0.493278	0.298704	0.150541	0.0958219	0.161624	0.143646	1	0.471302	-0.126606	0.00684809	0.1073	-0.0931626	0.381325	0.360346	0.247487	0.0889146	0.482326	0.191791	0.261348	0.494118	0.230849	-0.067107	0.453188	0.306563	0.47319	0.455484	0.017084	0.299418	0.211824	0.543509	0.282845	-0.0477909	-0.039827	0.172269	0.266552	0.105844	0.25305	0.583637	0.314618	0.234489	0.31765	0.0914531	0.398716	-0.0487897
C8	0.831024	0.407544	0.0593396	0.184482	0.278792	0.500962	0.471302	1	-0.255647	-0.413286	0.702783	-0.413419	0.693682	0.685263	0.754418	-0.0106659	0.680629	0.367559	0.0221463	0.721538	0.480438	0.135791	0.870746	0.715897	0.586006	0.502666	0.429856	0.870175	0.291777	0.851013	0.448486	-0.202854	-0.607266	0.520165	0.376993	0.71381	0.151805	0.831358	0.784948	0.547816	0.128677	-0.0565136	0.616205	-0.13896
C9	-0.231366	-0.0342442	0.0763687	0.116014	-0.0906148	0.0159154	-0.126606	-0.255647	1	0.229019	-0.314159	0.243008	-0.204811	-0.210518	-0.221057	0.0805866	-0.134244	-0.231756	0.0676527	-0.134468	-0.222251	-0.025345	-0.175471	-0.357394	-0.187802	-0.160738	-0.364908	-0.333247	0.104343	-0.214665	-0.117238	0.0278916	0.323243	-0.240239	-0.0624291	-0.337092	0.0433043	-0.267875	-0.350275	-0.260656	-0.0167722	-0.145425	-0.258998	0.0489324
C10	-0.22758	0.0230322	0.210722	0.0883835	-0.219677	-0.0783326	0.00684809	-0.413286	0.229019	1	-0.601971	0.488394	-0.336092	-0.403568	-0.518909	0.165117	-0.190613	-0.335494	0.502062	-0.140785	-0.399464	-0.192783	-0.276473	-0.44317	-0.148653	-0.172645	-0.439533	-0.595605	0.0870637	-0.229496	-0.00623715	0.241665	0.544454	-0.371125	-0.194509	-0.654241	0.151868	-0.3154	-0.518846	-0.292682	0.267674	0.0586015	-0.192424	0.450416
C11	0.392013	0.0298619	-0.307198	0.0400373	0.151561	0.415968	0.1073	0.702783	-0.314159	-0.601971	1	-0.487405	0.442736	0.477095	0.728603	-0.262825	0.254928	0.360316	-0.385839	0.315596	0.634386	0.411796	0.601033	0.55263	0.0939961	0.213852	0.524028	0.87052	0.112196	0.352885	0.116679	-0.0289725	-0.692512	0.520298	0.539289	0.832025	-0.268929	0.436887	0.699655	0.424002	-0.302193	0.0454134	0.315965	-0.196947
C12	-0.227717	-0.0204846	0.0749778	0.0448013	-0.143669	-0.0389797	-0.0931626	-0.413419	0.243008	0.488394	-0.487405	1	-0.27642	-0.192411	-0.339181	0.0644149	-0.211598	-0.233845	0.116744	-0.123614	-0.342641	-0.0822392	-0.239928	-0.422413	-0.181954	-0.297266	-0.337179	-0.484954	0.188573	-0.245834	-0.116873	0.0396812	0.325688	-0.216692	-0.155797	-0.388194	0.0741062	-0.291623	-0.397331	-0.196592	0.038018	-0.089214	-0.249632	0.165817
C13	0.607316	0.265802	-0.0845764	0.064399	0.302644	0.288858	0.381325	0.693682	-0.204811	-0.336092	0.442736	-0.27642	1	0.48866	0.436159	0.0225322	0.473802	0.273908	0.0437445	0.577016	0.388878	-0.063758	0.581609	0.652619	0.468769	0.524818	0.372416	0.623946	0.134012	0.621975	0.384546	-0.291798	-0.317938	0.496137	0.268972	0.511374	0.177075	0.673158	0.591138	0.481149	0.208486	-0.0193534	0.577095	-0.170262
C14	0.65055	0.303629	-0.0690805	0.269844	0.12876	0.458967	0.360346	0.685263	-0.210518	-0.403568	0.477095	-0.192411	0.48866	1	0.597668	-0.0103362	0.592033	0.369219	-0.0650973	0.570043	0.373228	0.144455	0.684729	0.442684	0.632093	0.283815	0.316338	0.662864	0.341365	0.636486	0.348532	-0.280247	-0.44773	0.651711	0.285669	0.560423	0.0783229	0.754245	0.715453	0.527234	0.0741626	-0.119602	0.327781	-0.0986554
C15	0.546928	0.2873	-0.0754008	0.145993	0.0691039	0.509339	0.247487	0.754418	-0.221057	-0.518909	0.728603	-0.339181	0.436159	0.597668	1	-0.092729	0.499855	0.26396	-0.235909	0.47092	0.563251	0.245521	0.69042	0.519817	0.293967	0.264849	0.479519	0.785862	0.262403	0.602023	0.251722	-0.0187315	-0.649064	0.415295	0.456824	0.755504	-0.032129	0.520448	0.708595	0.435099	-0.183607	-0.00373848	0.433322	-0.0697499
C16	0.049744	0.11516	0.19164	0.134861	-0.0875165	0.0787807	0.0889146	-0.0106659	0.0805866	0.165117	-0.262825	0.0644149	0.0225322	-0.0103362	-0.092729	1	0.079612	-0.0507062	0.142086	0.0303793	-0.149616	-0.0886597	-0.00888068	-0.0769368	0.15713	-0.0243059	-0.10311	-0.170858	0.0220109	0.0729317	-0.0130848	0.0870212	0.195539	-0.197505	-0.144195	-0.226504	0.184097	0.0288898	-0.135934	-0.0463333	0.269274	0.0989314	-0.0356082	0.240565
C17	0.748665	0.362369	0.215811	0.223609	0.210706	0.364083	0.482326	0.680629	-0.134244	-0.190613	0.254928	-0.211598	0.473802	0.592033	0.499855	0.079612	1	0.239111	0.17648	0.638268	0.352274	0.0134871	0.684785	0.478132	0.608496	0.447696	0.242427	0.543488	0.255007	0.734918	0.423339	-0.105643	-0.307886	0.289237	0.295091	0.383804	0.28084	0.692889	0.50937	0.363647	0.268129	0.0160772	0.568357	-0.0710603
C18	0.354862	0.080383	-0.146439	-0.0495037	0.185845	0.0461404	0.191791	0.367559	-0.231756	-0.335494	0.360316	-0.233845	0.273908	0.369219	0.26396	-0.0507062	0.239111	1	-0.102575	0.321327	0.281556	0.0494055	0.37121	0.414472	0.296413	0.21617	0.385642	0.475436	-0.0780289	0.269998	0.280661	-0.274943	-0.285065	0.366234	0.115726	0.465592	-0.0592096	0.382261	0.481376	0.210927	0.00884718	0.0364223	0.27968	-0.178677
C19	0.222389	0.337092	0.298299	0.191853	0.0606836	-0.0448932	0.261348	0.0221463	0.0676527	0.502062	-0.385839	0.116744	0.0437445	-0.0650973	-0.235909	0.142086	0.17648	-0.102575	1	0.235822	-0.202154	-0.204704	0.0605948	0.0162006	0.262432	0.182096	-0.168614	-0.238939	0.103623	0.219565	0.204452	0.0289667	0.267912	-0.0175699	-0.150622	-0.324517	0.346403	0.175951	-0.146582	-0.0248697	0.537128	0.0722713	0.144798	0.268014
C20	0.76855	0.410072	0.0322436	0.135938	0.281899	0.32314	0.494118	0.721538	-0.134468	-0.140785	0.315596	-0.123614	0.577016	0.570043	0.47092	0.0303793	0.638268	0.321327	0.235822	1	0.314887	-0.00892411	0.717253	0.544349	0.63273	0.460778	0.248576	0.589026	0.321521	0.754498	0.511557	-0.333992	-0.223819	0.483591	0.237158	0.401557	0.319129	0.781413	0.608766	0.446127	0.33129	0.0251934	0.558353	-0.0984062
C21	0.338706	0.0946274	-0.378091	-0.0144954	0.0280435	0.346754	0.230849	0.480438	-0.222251	-0.399464	0.634386	-0.342641	0.388878	0.373228	0.563251	-0.149616	0.352274	0.281556	-0.202154	0.314887	1	0.384862	0.466251	0.355215	0.166108	0.287677	0.596366	0.669022	0.153269	0.270416	0.109739	0.0725158	-0.272969	0.348427	0.854119	0.542317	-0.0539896	0.3737	0.577234	0.36845	-0.135172	0.612681	0.400726	0.17487
C22	-0.00779305	-0.073394	-0.189295	0.104063	-0.205964	0.333113	-0.067107	0.135791	-0.025345	-0.192783	0.411796	-0.0822392	-0.063758	0.144455	0.245521	-0.0886597	0.0134871	0.0494055	-0.204704	-0.00892411	0.384862	1	0.133296	-0.132915	-0.109139	-0.0675214	0.117633	0.255133	0.132193	-0.10157	-0.195628	0.209312	-0.165739	0.139394	0.47026	0.254685	-0.293004	0.00140937	0.167296	0.135648	-0.28735	0.191418	-0.133952	0.0955243
C23	0.827346	0.434761	0.0859556	0.220874	0.243472	0.51246	0.453188	0.870746	-0.175471	-0.276473	0.601033	-0.239928	0.581609	0.684729	0.69042	-0.00888068	0.684785	0.37121	0.0605948	0.717253	0.466251	0.133296	1	0.589039	0.551384	0.454981	0.337453	0.790294	0.355045	0.751427	0.474804	-0.210183	-0.521558	0.544286	0.405821	0.635757	0.212345	0.795395	0.751261	0.500551	0.103559	-0.0210339	0.492922	-0.0966874
C24	0.63984	0.30114	-0.14095	0.0102146	0.52631	0.154843	0.306563	0.715897	-0.357394	-0.44317	0.55263	-0.422413	0.652619	0.442684	0.519817	-0.0769368	0.478132	0.414472	0.0162006	0.544349	0.355215	-0.132915	0.589039	1	0.424281	0.485173	0.576975	0.737552	-0.0631882	0.668422	0.456497	-0.328962	-0.589851	0.45182	0.108607	0.65106	0.113119	0.641013	0.652991	0.280481	0.171957	-0.130967	0.710232	-0.256354
C25	0.66548	0.344947	0.159133	0.184825	0.235213	0.244623	0.47319	0.586006	-0.187802	-0.148653	0.0939961	-0.181954	0.468769	0.632093	0.293967	0.15713	0.608496	0.296413	0.262432	0.63273	0.166108	-0.109139	0.551384	0.424281	1	0.525256	0.0909615	0.435646	0.256539	0.735924	0.472009	-0.314764	-0.15815	0.42443	0.026773	0.238598	0.403611	0.762341	0.497415	0.4475	0.35865	-0.0840398	0.47043	-0.105986
C26	0.490013	0.25122	0.00523406	0.128111	0.291269	0.159944	0.455484	0.502666	-0.160738	-0.172645	0.213852	-0.297266	0.524818	0.283815	0.264849	-0.0243059	0.447696	0.21617	0.182096	0.460778	0.287677	-0.0675214	0.454981	0.485173	0.525256	1	0.203622	0.447403	0.136007	0.549064	0.427282	-0.157917	-0.14227	0.220263	0.15595	0.272926	0.170787	0.585558	0.413574	0.230362	0.235326	0.0669945	0.455063	-0.21136
C27	0.341109	0.138632	-0.310543	-0.0767412	0.0792427	0.119664	0.017084	0.429856	-0.364908	-0.439533	0.524028	-0.337179	0.372416	0.316338	0.479519	-0.10311	0.242427	0.385642	-0.168614	0.248576	0.596366	0.117633	0.337453	0.576975	0.0909615	0.203622	1	0.612428	-0.145841	0.265541	0.185552	-0.163631	-0.466886	0.309923	0.314492	0.661532	-0.0542712	0.232613	0.55063	0.249989	0.00279214	0.351029	0.450449	0.212673
C28	0.665149	0.258589	-0.208591	0.09139	0.280647	0.444632	0.299418	0.870175	-0.333247	-0.595605	0.87052	-0.484954	0.623946	0.662864	0.785862	-0.170858	0.543488	0.475436	-0.238939	0.589026	0.669022	0.255133	0.790294	0.737552	0.435646	0.447403	0.612428	1	0.173311	0.652984	0.364038	-0.237736	-0.677771	0.619446	0.479676	0.853806	-0.0267625	0.697174	0.852838	0.531489	-0.0875356	0.0536247	0.557365	-0.191573
C29	0.34198	0.259918	0.0958369	0.361692	-0.0211624	0.298951	0.211824	0.291777	0.104343	0.0870637	0.112196	0.188573	0.134012	0.341365	0.262403	0.0220109	0.255007	-0.0780289	0.103623	0.321521	0.153269	0.132193	0.355045	-0.0631882	0.256539	0.136007	-0.145841	0.173311	1	0.345643	0.131724	-0.0345858	-0.0468832	0.184753	0.312967	0.0664287	0.140612	0.323584	0.237661	0.236289	0.0109909	-0.00600446	0.0495648	0.0700007
C30	0.818812	0.499377	0.206476	0.22207	0.36356	0.405487	0.543509	0.851013	-0.214665	-0.229496	0.352885	-0.245834	0.621975	0.636486	0.602023	0.0729317	0.734918	0.269998	0.219565	0.754498	0.270416	-0.10157	0.751427	0.668422	0.735924	0.549064	0.265541	0.652984	0.345643	1	0.560461	-0.270213	-0.400248	0.437042	0.142187	0.483822	0.363236	0.823997	0.668653	0.472233	0.333282	-0.103901	0.680768	-0.138478
C31	0.462327	0.27417	0.050453	0.153432	0.309195	0.149833	0.282845	0.448486	-0.117238	-0.00623715	0.116679	-0.116873	0.384546	0.348532	0.251722	-0.0130848	0.423339	0.280661	0.204452	0.511557	0.109739	-0.195628	0.474804	0.456497	0.472009	0.427282	0.185552	0.364038	0.131724	0.560461	1	-0.19618	-0.165377	0.227362	-0.01603	0.248774	0.208995	0.493837	0.423249	0.250854	0.303624	-0.100969	0.530241	-0.00586551
C32	-0.317966	-0.288669	0.265671	-0.0362498	-0.369109	0.0724667	-0.0477909	-0.202854	0.0278916	0.241665	-0.0289725	0.0396812	-0.291798	-0.280247	-0.0187315	0.0870212	-0.105643	-0.274943	0.0289667	-0.333992	0.0725158	0.209312	-0.210183	-0.328962	-0.314764	-0.157917	-0.163631	-0.237736	-0.0345858	-0.270213	-0.19618	1	0.15045	-0.482478	0.245081	-0.229706	-0.176737	-0.365302	-0.323628	-0.230777	-0.205146	0.217014	-0.110621	0.324514
C33	-0.427239	-0.206959	0.064303	-0.0912218	-0.207694	-0.285067	-0.039827	-0.607266	0.323243	0.544454	-0.692512	0.325688	-0.317938	-0.44773	-0.649064	0.195539	-0.307886	-0.285065	0.267912	-0.223819	-0.272969	-0.165739	-0.521558	-0.589851	-0.15815	-0.14227	-0.466886	-0.677771	-0.0468832	-0.400248	-0.165377	0.15045	1	-0.368625	-0.136714	-0.732967	0.159312	-0.377714	-0.526041	-0.351513	0.256143	0.263763	-0.363145	0.293457
C34	0.478612	0.252197	-0.308222	0.158172	0.189085	0.28453	0.172269	0.520165	-0.240239	-0.371125	0.520298	-0.216692	0.496137	0.651711	0.415295	-0.197505	0.289237	0.366234	-0.0175699	0.483591	0.348427	0.139394	0.544286	0.45182	0.42443	0.220263	0.309923	0.619446	0.184753	0.437042	0.227362	-0.482478	-0.368625	1	0.224702	0.542983	0.0414282	0.583639	0.684909	0.522391	0.016393	-0.0551511	0.237082	-0.202838
C35	0.215709	0.0470874	-0.259412	0.0538648	-0.0421418	0.402863	0.266552	0.376993	-0.0624291	-0.194509	0.539289	-0.155797	0.268972	0.285669	0.456824	-0.144195	0.295091	0.115726	-0.150622	0.237158	0.854119	0.47026	0.405821	0.108607	0.026773	0.15595	0.314492	0.479676	0.312967	0.142187	-0.01603	0.245081	-0.136714	0.224702	1	0.346938	-0.100731	0.265721	0.363254	0.297516	-0.173014	0.526403	0.235241	0.180118
C36	0.528904	0.198261	-0.259945	0.0166973	0.246199	0.370378	0.105844	0.71381	-0.337092	-0.654241	0.832025	-0.388194	0.511374	0.560423	0.755504	-0.226504	0.383804	0.465592	-0.324517	0.401557	0.542317	0.254685	0.635757	0.65106	0.238598	0.272926	0.661532	0.853806	0.0664287	0.483822	0.248774	-0.229706	-0.732967	0.542983	0.346938	1	-0.131923	0.496115	0.752485	0.450672	-0.157387	-0.0442588	0.47501	-0.219571
C37	0.294235	0.323671	0.283944	0.111277	0.191915	0.0469955	0.25305	0.151805	0.0433043	0.151868	-0.268929	0.0741062	0.177075	0.0783229	-0.032129	0.184097	0.28084	-0.0592096	0.346403	0.319129	-0.0539896	-0.293004	0.212345	0.113119	0.403611	0.170787	-0.0542712	-0.0267625	0.140612	0.363236	0.208995	-0.176737	0.159312	0.0414282	-0.100731	-0.131923	1	0.28729	0.0447985	0.141677	0.404831	0.0919833	0.323535	0.111314
C38	0.849614	0.439836	0.0414995	0.20546	0.368915	0.349203	0.583637	0.831358	-0.267875	-0.3154	0.436887	-0.291623	0.673158	0.754245	0.520448	0.0288898	0.692889	0.382261	0.175951	0.781413	0.3737	0.00140937	0.795395	0.641013	0.762341	0.585558	0.232613	0.697174	0.323584	0.823997	0.493837	-0.365302	-0.377714	0.583639	0.265721	0.496115	0.28729	1	0.729139	0.524496	0.247764	-0.0551051	0.534903	-0.269972
C39	0.674243	0.311229	-0.197803	0.106024	0.220301	0.359401	0.314618	0.784948	-0.350275	-0.518846	0.699655	-0.397331	0.591138	0.715453	0.708595	-0.135934	0.50937	0.481376	-0.146582	0.608766	0.577234	0.167296	0.751261	0.652991	0.497415	0.413574	0.55063	0.852838	0.237661	0.668653	0.423249	-0.323628	-0.526041	0.684909	0.363254	0.752485	0.0447985	0.729139	1	0.51336	0.0123245	0.0918538	0.508197	-0.133975
C40	0.454894	0.203817	-0.16011	0.0683096	0.128732	0.328841	0.234489	0.547816	-0.260656	-0.292682	0.424002	-0.196592	0.481149	0.527234	0.435099	-0.0463333	0.363647	0.210927	-0.0248697	0.446127	0.36845	0.135648	0.500551	0.280481	0.4475	0.230362	0.249989	0.531489	0.236289	0.472233	0.250854	-0.230777	-0.351513	0.522391	0.297516	0.450672	0.141677	0.524496	0.51336	1	0.0838597	0.0601897	0.322503	-0.0733506
C41	0.303923	0.299379	0.161467	0.136804	0.162865	0.0135495	0.31765	0.128677	-0.0167722	0.267674	-0.302193	0.038018	0.208486	0.0741626	-0.183607	0.269274	0.268129	0.00884718	0.537128	0.33129	-0.135172	-0.28735	0.103559	0.171957	0.35865	0.235326	0.00279214	-0.0875356	0.0109909	0.333282	0.303624	-0.205146	0.256143	0.016393	-0.173014	-0.157387	0.404831	0.247764	0.0123245	0.0838597	1	0.0796948	0.345443	0.18884
C42	-0.0408149	-0.0209594	-0.170765	-0.102301	-0.232389	0.045993	0.0914531	-0.0565136	-0.145425	0.0586015	0.0454134	-0.089214	-0.0193534	-0.119602	-0.00373848	0.0989314	0.0160772	0.0364223	0.0722713	0.0251934	0.612681	0.191418	-0.0210339	-0.130967	-0.0840398	0.0669945	0.351029	0.0536247	-0.00600446	-0.103901	-0.100969	0.217014	0.263763	-0.0551511	0.526403	-0.0442588	0.0919833	-0.0551051	0.0918538	0.0601897	0.0796948	1	0.104656	0.482338
C43	0.550332	0.330438	0.00171124	0.0364983	0.359883	0.233946	0.398716	0.616205	-0.258998	-0.192424	0.315965	-0.249632	0.577095	0.327781	0.433322	-0.0356082	0.568357	0.27968	0.144798	0.558353	0.400726	-0.133952	0.492922	0.710232	0.47043	0.455063	0.450449	0.557365	0.0495648	0.680768	0.530241	-0.110621	-0.363145	0.237082	0.235241	0.47501	0.323535	0.534903	0.508197	0.322503	0.345443	0.104656	1	-0.000582816
C44	-0.105773	0.029114	0.0724251	0.106512	-0.454839	0.148643	-0.0487897	-0.13896	0.0489324	0.450416	-0.196947	0.165817	-0.170262	-0.0986554	-0.0697499	0.240565	-0.0710603	-0.178677	0.268014	-0.0984062	0.17487	0.0955243	-0.0966874	-0.256354	-0.105986	-0.21136	0.212673	-0.191573	0.0700007	-0.138478	-0.00586551	0.324514	0.293457	-0.202838	0.180118	-0.219571	0.111314	-0.269972	-0.133975	-0.0733506	0.18884	0.482338	-0.000582816	1

## Sheet: EC
	C1	C2	C3	C4	C5	C6	C7	C8	C9	C10	C11	C12	C13	C14	C15	C16	C17	C18	C19	C20	C21	C22	C23	C24	C25	C26	C27	C28	C29	C30	C31	C32	C33	C34	C35	C36	C37	C38	C39	C40	C41	C42	C43	C44
C1	1	0.278937	0.327418	-0.367587	-0.622184	-0.374627	-0.0951193	0.54954	0.218917	-0.397874	-0.297938	-0.179472	-0.559825	-0.490178	0.143892	-0.535923	0.475675	-0.213767	-0.493374	-0.233345	-0.452438	0.247763	0.061505	-0.594939	0.452562	-0.579487	-0.396017	0.359237	-0.64786	-0.357238	-0.0271085	-0.317287	-0.455415	-0.451103	-0.464387	-0.524217	-0.346096	0.515747	-0.364173	-0.413251	0.197522	-0.536974	-0.414671	-0.385233
C2	0.278937	1	-0.360346	-0.439971	-0.1235	-0.247871	-0.027579	-0.089853	0.234401	-0.360937	-0.225332	-0.319672	-0.113269	-0.410348	-0.271846	-0.293811	0.312187	0.48175	-0.194439	-0.193741	0.217665	-0.0821469	-0.154118	-0.202881	-0.109712	-0.0534825	0.20315	0.0327211	-0.0366309	-0.298765	-0.175566	-0.0537428	0.280961	-0.249978	0.19359	-0.132982	-0.0687503	0.35105	0.193398	0.140875	-0.0823982	0.074075	0.164547	0.269217
C3	0.327418	-0.360346	1	0.183603	-0.561717	-0.348784	-0.189579	0.683418	-0.0444309	0.0444857	-0.0464905	0.21588	-0.479038	-0.116003	0.545315	-0.228156	0.213164	-0.811518	-0.292463	-0.0319795	-0.748242	0.587671	0.365445	-0.434028	0.600663	-0.654279	-0.748216	0.511339	-0.643016	0.137492	0.190724	-0.252674	-0.814951	-0.166674	-0.782673	-0.376137	-0.12809	0.281579	-0.465959	-0.714997	0.414686	-0.631267	-0.697607	-0.71947
C4	-0.367587	-0.439971	0.183603	1	0.621386	0.477822	-0.236346	-0.211717	-0.0701885	0.802957	0.854965	0.632831	0.704635	0.857956	0.437901	0.855852	-0.694897	-0.249627	0.753438	0.617802	0.344219	0.317454	0.677421	0.708736	-0.0934692	0.478131	-0.195555	-0.203402	0.35189	0.871629	0.642303	0.671562	0.141113	0.759078	0.337785	0.7538	0.54893	-0.650154	0.350826	0.270539	0.350157	0.314896	0.0519809	-0.190725
C5	-0.622184	-0.1235	-0.561717	0.621386	1	0.702908	-0.0511388	-0.801001	-0.0242791	0.589253	0.66327	0.37257	0.958471	0.818738	-0.160361	0.903678	-0.771993	0.446758	0.856612	0.491095	0.833473	-0.266891	0.204172	0.960779	-0.571876	0.924824	0.579186	-0.644468	0.889402	0.577412	0.286386	0.695888	0.806767	0.763271	0.858401	0.912094	0.639206	-0.781607	0.686518	0.757655	-0.0463653	0.840495	0.699359	0.549802
C6	-0.374627	-0.247871	-0.348784	0.477822	0.702908	1	-0.14398	-0.594528	0.0885836	0.452281	0.496018	0.340025	0.632508	0.776225	-0.181225	0.710097	-0.757422	0.110424	0.608877	0.354376	0.440317	-0.423716	0.03615	0.738519	-0.441506	0.746613	0.401966	-0.707424	0.564386	0.370489	0.168173	0.331808	0.452913	0.654676	0.584648	0.568956	0.343117	-0.776215	0.213192	0.520807	-0.212905	0.434882	0.379807	0.262288
C7	-0.0951193	-0.027579	-0.189579	-0.236346	-0.0511388	-0.14398	1	-0.0185211	-0.270939	-0.115886	-0.122885	-0.26418	-0.0822874	-0.205492	-0.170437	-0.132072	0.0655345	0.0645829	-0.0338058	0.0107003	0.0869491	-0.227877	-0.172565	-0.167501	0.112443	0.0114437	0.21266	0.0995554	0.110463	-0.0634531	-0.223844	0.0860773	0.0818689	-0.10648	-0.0181667	-0.0412438	0.020429	0.144823	0.0355668	0.00313417	0.0495492	0.118395	0.138086	0.159461
C8	0.54954	-0.089853	0.683418	-0.211717	-0.801001	-0.594528	-0.0185211	1	-0.050133	-0.200145	-0.303044	-0.143964	-0.725316	-0.526031	0.389564	-0.593393	0.567428	-0.661213	-0.578627	-0.206483	-0.725713	0.471996	0.13852	-0.731905	0.59064	-0.808644	-0.756999	0.610728	-0.801611	-0.201619	0.00210334	-0.412612	-0.841805	-0.495719	-0.771746	-0.642505	-0.441342	0.606237	-0.581372	-0.686008	0.368336	-0.785213	-0.750448	-0.758941
C9	0.218917	0.234401	-0.0444309	-0.0701885	-0.0242791	0.0885836	-0.270939	-0.050133	1	-0.1485	-0.0675218	0.173208	-0.0144925	0.0314473	-0.0619853	0.00186954	0.0602816	0.187216	-0.123331	-0.214223	-0.0792219	-0.00348681	-0.0400572	0.0485367	-0.177039	-0.111052	0.0790012	-0.00205706	-0.040169	-0.0924106	0.128733	-0.155288	0.109638	-0.00972368	0.0371956	-0.0444458	0.118543	-0.0678718	0.117649	-0.101405	-0.158838	0.0128846	0.0826774	0.142018
C10	-0.397874	-0.360937	0.0444857	0.802957	0.589253	0.452281	-0.115886	-0.200145	-0.1485	1	0.691168	0.439996	0.644916	0.712857	0.274677	0.717298	-0.64165	-0.249287	0.73776	0.572066	0.394314	0.0896513	0.575715	0.617033	-0.13007	0.47941	-0.0901286	-0.368203	0.352322	0.723911	0.363617	0.557427	0.175892	0.730607	0.390122	0.639006	0.440439	-0.615396	0.276037	0.368096	0.231856	0.319974	0.0936803	-0.110686
C11	-0.297938	-0.225332	-0.0464905	0.854965	0.66327	0.496018	-0.122885	-0.303044	-0.0675218	0.691168	1	0.627119	0.723711	0.779029	0.298241	0.849229	-0.618136	0.00705818	0.73747	0.625957	0.499803	0.231027	0.609782	0.703378	-0.144839	0.567495	0.040245	-0.183489	0.470494	0.85086	0.683977	0.845435	0.358378	0.7191	0.470682	0.830391	0.70324	-0.583125	0.554619	0.403437	0.382202	0.494202	0.300117	0.00295117
C12	-0.179472	-0.319672	0.21588	0.632831	0.37257	0.340025	-0.26418	-0.143964	0.173208	0.439996	0.627119	1	0.402031	0.593534	0.354202	0.60918	-0.4386	-0.193274	0.451041	0.314132	0.0870703	0.326305	0.483757	0.420052	-0.0101285	0.199315	0.000758488	-0.0291579	0.250015	0.630095	0.500774	0.445923	0.109623	0.508392	0.0961779	0.510707	0.648422	-0.380125	0.38391	-0.0261342	0.378619	0.325031	0.202179	0.0056534
C13	-0.559825	-0.113269	-0.479038	0.704635	0.958471	0.632508	-0.0822874	-0.725316	-0.0144925	0.644916	0.723711	0.402031	1	0.806585	-0.0670212	0.906795	-0.756536	0.394309	0.900475	0.585566	0.845273	-0.144153	0.363122	0.938304	-0.492343	0.862933	0.418314	-0.562478	0.786422	0.67143	0.365566	0.767254	0.75249	0.813531	0.846011	0.936048	0.625799	-0.754551	0.696142	0.751877	0.0445248	0.774022	0.607153	0.428599
C14	-0.490178	-0.410348	-0.116003	0.857956	0.818738	0.776225	-0.205492	-0.526031	0.0314473	0.712857	0.779029	0.593534	0.806585	1	0.120157	0.948173	-0.844943	-0.00360951	0.779772	0.508177	0.456922	-0.0282289	0.346825	0.881558	-0.347	0.726428	0.226841	-0.477397	0.634134	0.720157	0.530174	0.614807	0.409695	0.792731	0.528711	0.809345	0.618295	-0.856055	0.438539	0.429002	0.0656949	0.529028	0.35762	0.156897
C15	0.143892	-0.271846	0.545315	0.437901	-0.160361	-0.181225	-0.170437	0.389564	-0.0619853	0.274677	0.298241	0.354202	-0.0670212	0.120157	1	0.106029	0.0316661	-0.4351	0.0396	0.276942	-0.254997	0.579557	0.486903	-0.0823271	0.317979	-0.287827	-0.592528	0.383912	-0.307623	0.376557	0.352841	0.126756	-0.413982	0.0630557	-0.332875	0.0500062	0.0973034	0.0393744	-0.0696723	-0.321121	0.39192	-0.265377	-0.453067	-0.499917
C16	-0.535923	-0.293811	-0.228156	0.855852	0.903678	0.710097	-0.132072	-0.593393	0.00186954	0.717298	0.849229	0.60918	0.906795	0.948173	0.106029	1	-0.816834	0.146136	0.870038	0.604603	0.63554	0.00240608	0.423326	0.92804	-0.375174	0.799142	0.312063	-0.478482	0.72418	0.803241	0.538108	0.76702	0.57316	0.833335	0.65364	0.928549	0.743298	-0.790284	0.627572	0.542927	0.174128	0.687411	0.494326	0.271281
C17	0.475675	0.312187	0.213164	-0.694897	-0.771993	-0.757422	0.0655345	0.567428	0.0602816	-0.64165	-0.618136	-0.4386	-0.756536	-0.844943	0.0316661	-0.816834	1	-0.0206772	-0.795297	-0.514825	-0.49887	0.215434	-0.307118	-0.79518	0.369033	-0.745634	-0.271371	0.539132	-0.551493	-0.588141	-0.245613	-0.491022	-0.432257	-0.801637	-0.580495	-0.701501	-0.454666	0.754842	-0.293386	-0.5243	0.0093486	-0.49959	-0.367019	-0.193533
C18	-0.213767	0.48175	-0.811518	-0.249627	0.446758	0.110424	0.0645829	-0.661213	0.187216	-0.249287	0.00705818	-0.193274	0.394309	-0.00360951	-0.4351	0.146136	-0.0206772	1	0.120872	-0.069142	0.631434	-0.341122	-0.340183	0.351054	-0.52383	0.452558	0.753947	-0.251119	0.585226	-0.151378	-0.0290781	0.269295	0.836519	-0.0038533	0.62326	0.340991	0.260271	-0.133068	0.621648	0.533189	-0.371521	0.662125	0.731105	0.827099
C19	-0.493374	-0.194439	-0.292463	0.753438	0.856612	0.608877	-0.0338058	-0.578627	-0.123331	0.73776	0.73747	0.451041	0.900475	0.779772	0.0396	0.870038	-0.795297	0.120872	1	0.691093	0.750199	-0.0693461	0.549802	0.841324	-0.314018	0.775742	0.232963	-0.598363	0.610142	0.757857	0.295645	0.731328	0.572169	0.941721	0.743558	0.865056	0.590755	-0.675008	0.548038	0.67236	0.215267	0.647752	0.45849	0.235483
C20	-0.233345	-0.193741	-0.0319795	0.617802	0.491095	0.354376	0.0107003	-0.206483	-0.214223	0.572066	0.625957	0.314132	0.585566	0.508177	0.276942	0.604603	-0.514825	-0.069142	0.691093	1	0.509035	0.106345	0.451251	0.474278	0.00418021	0.497829	-0.0815909	-0.201636	0.234608	0.700851	0.297112	0.622166	0.258046	0.600845	0.422009	0.602861	0.345393	-0.282024	0.301073	0.409517	0.429982	0.27019	0.116551	-0.127372
C21	-0.452438	0.217665	-0.748242	0.344219	0.833473	0.440317	0.0869491	-0.725713	-0.0792219	0.394314	0.499803	0.0870703	0.845273	0.456922	-0.254997	0.63554	-0.49887	0.631434	0.750199	0.509035	1	-0.310274	0.161927	0.730553	-0.524268	0.828232	0.535776	-0.562615	0.737678	0.409776	0.120047	0.693748	0.868926	0.601541	0.959667	0.795308	0.431478	-0.489374	0.704017	0.869828	-0.0142962	0.777764	0.670943	0.552098
C22	0.247763	-0.0821469	0.587671	0.317454	-0.266891	-0.423716	-0.227877	0.471996	-0.00348681	0.0896513	0.231027	0.326305	-0.144153	-0.0282289	0.579557	0.00240608	0.215434	-0.341122	-0.0693461	0.106345	-0.310274	1	0.506473	-0.196147	0.41936	-0.426742	-0.556625	0.576184	-0.35775	0.35104	0.486332	0.159707	-0.37964	-0.0441702	-0.408363	-0.00798201	0.17281	0.248024	0.0900646	-0.489709	0.552542	-0.244429	-0.328623	-0.429826
C23	0.061505	-0.154118	0.365445	0.677421	0.204172	0.03615	-0.172565	0.13852	-0.0400572	0.575715	0.609782	0.483757	0.363122	0.346825	0.486903	0.423326	-0.307118	-0.340183	0.549802	0.451251	0.161927	0.506473	1	0.273742	0.17949	0.0213348	-0.444849	0.00296487	-0.0648593	0.657597	0.456506	0.516251	-0.0800697	0.602433	0.103911	0.44283	0.384969	-0.204477	0.21143	0.11922	0.560367	0.103201	-0.106408	-0.329045
C24	-0.594939	-0.202881	-0.434028	0.708736	0.960779	0.738519	-0.167501	-0.731905	0.0485367	0.617033	0.703378	0.420052	0.938304	0.881558	-0.0823271	0.92804	-0.79518	0.351054	0.841324	0.474278	0.730553	-0.196147	0.273742	1	-0.587006	0.864965	0.467127	-0.606194	0.828557	0.621532	0.380535	0.664028	0.710878	0.798828	0.791768	0.895601	0.628302	-0.843037	0.62355	0.682777	-0.0576196	0.761764	0.600537	0.448675
C25	0.452562	-0.109712	0.600663	-0.0934692	-0.571876	-0.441506	0.112443	0.59064	-0.177039	-0.13007	-0.144839	-0.0101285	-0.492343	-0.347	0.317979	-0.375174	0.369033	-0.52383	-0.314018	0.00418021	-0.524268	0.41936	0.17949	-0.587006	1	-0.563008	-0.553435	0.467251	-0.637726	-0.0277088	-0.0112899	-0.182	-0.623292	-0.344259	-0.664176	-0.432492	-0.154497	0.525217	-0.353189	-0.607918	0.466525	-0.546711	-0.466002	-0.555232
C26	-0.579487	-0.0534825	-0.654279	0.478131	0.924824	0.746613	0.0114437	-0.808644	-0.111052	0.47941	0.567495	0.199315	0.862933	0.726428	-0.287827	0.799142	-0.745634	0.452558	0.775742	0.497829	0.828232	-0.426742	0.0213348	0.864965	-0.563008	1	0.608489	-0.704079	0.819314	0.457342	0.15278	0.596492	0.784227	0.668531	0.864436	0.792849	0.481763	-0.697343	0.536541	0.788778	-0.126981	0.74817	0.646021	0.51029
C27	-0.396017	0.20315	-0.748216	-0.195555	0.579186	0.401966	0.21266	-0.756999	0.0790012	-0.0901286	0.040245	0.000758488	0.418314	0.226841	-0.592528	0.312063	-0.271371	0.753947	0.232963	-0.0815909	0.535776	-0.556625	-0.444849	0.467127	-0.553435	0.608489	1	-0.472523	0.79464	-0.0802571	-0.144296	0.238475	0.833159	0.14945	0.575997	0.396094	0.433435	-0.33451	0.572729	0.488773	-0.344893	0.788989	0.890635	0.942373
C28	0.359237	0.0327211	0.511339	-0.203402	-0.644468	-0.707424	0.0995554	0.610728	-0.00205706	-0.368203	-0.183489	-0.0291579	-0.562478	-0.477397	0.383912	-0.478482	0.539132	-0.251119	-0.598363	-0.201636	-0.562615	0.576184	0.00296487	-0.606194	0.467251	-0.704079	-0.472523	1	-0.534422	-0.146424	0.173799	-0.183379	-0.528311	-0.582744	-0.673528	-0.442735	-0.171226	0.57882	-0.185915	-0.672964	0.298804	-0.471558	-0.443293	-0.407791
C29	-0.64786	-0.0366309	-0.643016	0.35189	0.889402	0.564386	0.110463	-0.801611	-0.040169	0.352322	0.470494	0.250015	0.786422	0.634134	-0.307623	0.72418	-0.551493	0.585226	0.610142	0.234608	0.737678	-0.35775	-0.0648593	0.828557	-0.637726	0.819314	0.79464	-0.534422	1	0.367039	0.194809	0.611655	0.847186	0.519139	0.760021	0.790471	0.634206	-0.673171	0.736491	0.66897	-0.161604	0.899885	0.826999	0.756048
C30	-0.357238	-0.298765	0.137492	0.871629	0.577412	0.370489	-0.0634531	-0.201619	-0.0924106	0.723911	0.85086	0.630095	0.67143	0.720157	0.376557	0.803241	-0.588141	-0.151378	0.757857	0.700851	0.409776	0.35104	0.657597	0.621532	-0.0277088	0.457342	-0.0802571	-0.146424	0.367039	1	0.600058	0.787435	0.254739	0.743149	0.343459	0.760451	0.673032	-0.469538	0.538339	0.231411	0.509885	0.406521	0.186616	-0.0784155
C31	-0.0271085	-0.175566	0.190724	0.642303	0.286386	0.168173	-0.223844	0.00210334	0.128733	0.363617	0.683977	0.500774	0.365566	0.530174	0.352841	0.538108	-0.245613	-0.0290781	0.295645	0.297112	0.120047	0.486332	0.456506	0.380535	-0.0112899	0.15278	-0.144296	0.173799	0.194809	0.600058	1	0.61359	0.0932272	0.342367	0.102647	0.506562	0.524442	-0.32366	0.450391	0.0249154	0.404305	0.19412	0.0792394	-0.111601
C32	-0.317287	-0.0537428	-0.252674	0.671562	0.695888	0.331808	0.0860773	-0.412612	-0.155288	0.557427	0.845435	0.445923	0.767254	0.614807	0.126756	0.76702	-0.491022	0.269295	0.731328	0.622166	0.693748	0.159707	0.516251	0.664028	-0.182	0.596492	0.238475	-0.183379	0.611655	0.787435	0.61359	1	0.569179	0.645335	0.597813	0.882415	0.728808	-0.459216	0.772146	0.536577	0.421842	0.667376	0.519494	0.243842
C33	-0.455415	0.280961	-0.814951	0.141113	0.806767	0.452913	0.0818689	-0.841805	0.109638	0.175892	0.358378	0.109623	0.75249	0.409695	-0.413982	0.57316	-0.432257	0.836519	0.572169	0.258046	0.868926	-0.37964	-0.0800697	0.710878	-0.623292	0.784227	0.833159	-0.528311	0.847186	0.254739	0.0932272	0.569179	1	0.460507	0.870699	0.711152	0.55532	-0.46789	0.798314	0.748035	-0.183011	0.909468	0.891114	0.853906
C34	-0.451103	-0.249978	-0.166674	0.759078	0.763271	0.654676	-0.10648	-0.495719	-0.00972368	0.730607	0.7191	0.508392	0.813531	0.792731	0.0630557	0.833335	-0.801637	-0.0038533	0.941721	0.600845	0.601541	-0.0441702	0.602433	0.798828	-0.344259	0.668531	0.14945	-0.582744	0.519139	0.743149	0.342367	0.645335	0.460507	1	0.654434	0.795045	0.555016	-0.733247	0.450388	0.589757	0.179218	0.553314	0.369988	0.159358
C35	-0.464387	0.19359	-0.782673	0.337785	0.858401	0.584648	-0.0181667	-0.771746	0.0371956	0.390122	0.470682	0.0961779	0.846011	0.528711	-0.332875	0.65364	-0.580495	0.62326	0.743558	0.422009	0.959667	-0.408363	0.103911	0.791768	-0.664176	0.864436	0.575997	-0.673528	0.760021	0.343459	0.102647	0.597813	0.870699	0.654434	1	0.772161	0.380664	-0.616556	0.624021	0.908734	-0.164773	0.759992	0.665898	0.574444
C36	-0.524217	-0.132982	-0.376137	0.7538	0.912094	0.568956	-0.0412438	-0.642505	-0.0444458	0.639006	0.830391	0.510707	0.936048	0.809345	0.0500062	0.928549	-0.701501	0.340991	0.865056	0.602861	0.795308	-0.00798201	0.44283	0.895601	-0.432492	0.792849	0.396094	-0.442735	0.790471	0.760451	0.506562	0.882415	0.711152	0.795045	0.772161	1	0.74637	-0.720067	0.774311	0.676425	0.186071	0.804899	0.620473	0.408365
C37	-0.346096	-0.0687503	-0.12809	0.54893	0.639206	0.343117	0.020429	-0.441342	0.118543	0.440439	0.70324	0.648422	0.625799	0.618295	0.0973034	0.743298	-0.454666	0.260271	0.590755	0.345393	0.431478	0.17281	0.384969	0.628302	-0.154497	0.481763	0.433435	-0.171226	0.634206	0.673032	0.524442	0.728808	0.55532	0.555016	0.380664	0.74637	1	-0.423774	0.7843	0.24218	0.349476	0.725836	0.621875	0.434723
C38	0.515747	0.35105	0.281579	-0.650154	-0.781607	-0.776215	0.144823	0.606237	-0.0678718	-0.615396	-0.583125	-0.380125	-0.754551	-0.856055	0.0393744	-0.790284	0.754842	-0.133068	-0.675008	-0.282024	-0.489374	0.248024	-0.204477	-0.843037	0.525217	-0.697343	-0.33451	0.57882	-0.673171	-0.469538	-0.32366	-0.459216	-0.46789	-0.733247	-0.616556	-0.720067	-0.423774	1	-0.355181	-0.547167	0.2374	-0.548498	-0.395772	-0.303037
C39	-0.364173	0.193398	-0.465959	0.350826	0.686518	0.213192	0.0355668	-0.581372	0.117649	0.276037	0.554619	0.38391	0.696142	0.438539	-0.0696723	0.627572	-0.293386	0.621648	0.548038	0.301073	0.704017	0.0900646	0.21143	0.62355	-0.353189	0.536541	0.572729	-0.185915	0.736491	0.538339	0.450391	0.772146	0.798314	0.450388	0.624021	0.774311	0.7843	-0.355181	1	0.459714	0.198823	0.825326	0.768613	0.645526
C40	-0.413251	0.140875	-0.714997	0.270539	0.757655	0.520807	0.00313417	-0.686008	-0.101405	0.368096	0.403437	-0.0261342	0.751877	0.429002	-0.321121	0.542927	-0.5243	0.533189	0.67236	0.409517	0.869828	-0.489709	0.11922	0.682777	-0.607918	0.788778	0.488773	-0.672964	0.66897	0.231411	0.0249154	0.536577	0.748035	0.589757	0.908734	0.676425	0.24218	-0.547167	0.459714	1	-0.198949	0.635358	0.562841	0.467685
C41	0.197522	-0.0823982	0.414686	0.350157	-0.0463653	-0.212905	0.0495492	0.368336	-0.158838	0.231856	0.382202	0.378619	0.0445248	0.0656949	0.39192	0.174128	0.0093486	-0.371521	0.215267	0.429982	-0.0142962	0.552542	0.560367	-0.0576196	0.466525	-0.126981	-0.344893	0.298804	-0.161604	0.509885	0.404305	0.421842	-0.183011	0.179218	-0.164773	0.186071	0.349476	0.2374	0.198823	-0.198949	1	-0.038821	-0.111908	-0.360229
C42	-0.536974	0.074075	-0.631267	0.314896	0.840495	0.434882	0.118395	-0.785213	0.0128846	0.319974	0.494202	0.325031	0.774022	0.529028	-0.265377	0.687411	-0.49959	0.662125	0.647752	0.27019	0.777764	-0.244429	0.103201	0.761764	-0.546711	0.74817	0.788989	-0.471558	0.899885	0.406521	0.19412	0.667376	0.909468	0.553314	0.759992	0.804899	0.725836	-0.548498	0.825326	0.635358	-0.038821	1	0.902291	0.825248
C43	-0.414671	0.164547	-0.697607	0.0519809	0.699359	0.379807	0.138086	-0.750448	0.0826774	0.0936803	0.300117	0.202179	0.607153	0.35762	-0.453067	0.494326	-0.367019	0.731105	0.45849	0.116551	0.670943	-0.328623	-0.106408	0.600537	-0.466002	0.646021	0.890635	-0.443293	0.826999	0.186616	0.0792394	0.519494	0.891114	0.369988	0.665898	0.620473	0.621875	-0.395772	0.768613	0.562841	-0.111908	0.902291	1	0.89269
C44	-0.385233	0.269217	-0.71947	-0.190725	0.549802	0.262288	0.159461	-0.758941	0.142018	-0.110686	0.00295117	0.0056534	0.428599	0.156897	-0.499917	0.271281	-0.193533	0.827099	0.235483	-0.127372	0.552098	-0.429826	-0.329045	0.448675	-0.555232	0.51029	0.942373	-0.407791	0.756048	-0.0784155	-0.111601	0.243842	0.853906	0.159358	0.574444	0.408365	0.434723	-0.303037	0.645526	0.467685	-0.360229	0.825248	0.89269	1

## Sheet: HAW
	C1	C2	C3	C4	C5	C6	C7	C8	C9	C10	C11	C12	C13	C14	C15	C16	C17	C18	C19	C20	C21	C22	C23	C24	C25	C26	C27	C28	C29	C30	C31	C32	C33	C34	C35	C36	C37	C38	C39	C40	C41	C42	C43	C44
C1	1	-0.0421739	-0.0400622	0.0723366	-0.379252	-0.201799	-0.230196	-0.0309457	-0.127197	-0.20531	-0.570911	-0.443076	-0.656535	0.152184	0.544068	-0.0741901	0.208687	0.0380365	0.00189897	0.314561	0.344838	0.471232	-0.457317	-0.665032	0.509458	-0.578354	-0.334921	-0.29706	0.472695	-0.169305	-0.352267	-0.242315	-0.457517	-0.0338543	0.23282	-0.39596	-0.558029	-0.482415	0.195559	-0.614147	0.10186	0.30475	0.102884	0.0129921
C2	-0.0421739	1	0.175969	0.0191915	-0.464814	0.0399618	0.461832	0.15043	0.251459	0.37842	-0.0408008	0.443715	-0.0508951	0.0952928	0.321788	0.0435831	0.261072	-0.285681	-0.110584	-0.217727	-0.0587554	0.159095	0.209769	-0.161113	0.0508475	-0.0808777	-0.108162	0.271348	-0.0672734	0.173547	0.174689	-0.452241	0.0239434	0.138963	0.155272	-0.252235	0.096772	0.358902	0.137979	-0.283243	-0.112816	0.456262	0.0763753	0.180861
C3	-0.0400622	0.175969	1	-0.112817	-0.185339	-0.157503	0.0304405	0.529127	0.142431	0.199441	-0.198516	0.332216	0.148968	-0.00628596	0.0472743	-0.100255	0.183728	0.134269	-0.127637	-0.2302	-0.586486	-0.151693	0.164515	0.05879	-0.000239358	-0.119915	-0.141787	0.0038911	-0.210059	-0.138246	0.00355066	-0.103053	-0.307915	-0.0956547	-0.591749	-0.378249	0.216152	0.297117	-0.235952	0.00928851	1.72691e-05	-0.235326	-0.157907	-0.536471
C4	0.0723366	0.0191915	-0.112817	1	-0.0667975	-0.0482655	0.086843	0.051005	-0.00978403	0.087528	-0.0741386	0.0801083	-0.143024	0.17137	0.179313	0.30061	0.274367	-0.13047	0.0714423	-0.105897	0.320403	0.282303	0.279321	-0.0803816	-0.0184214	-0.106843	0.0990357	0.0527525	0.261792	0.0630873	0.0262613	-0.0947609	-0.0144422	0.0784661	0.371242	-0.0716353	0.0625193	0.0217056	0.239708	-0.169665	0.24916	0.219669	0.0245132	0.00452503
C5	-0.379252	-0.464814	-0.185339	-0.0667975	1	0.130834	-0.454092	-0.37944	-0.258819	-0.411304	0.509411	-0.0401477	0.493795	-0.140776	-0.822935	0.0983447	-0.490753	0.13115	0.0342037	0.0309052	-0.118013	-0.418489	0.0705548	0.762891	-0.182902	0.561589	0.507834	0.0600373	-0.209439	0.131644	0.274835	0.859941	0.440973	-0.183693	-0.360774	0.739196	0.445952	-0.207204	0.039266	0.768551	0.17127	-0.501243	-0.133705	0.0393895
C6	-0.201799	0.0399618	-0.157503	-0.0482655	0.130834	1	0.152464	-0.0741412	0.0991621	0.181273	0.337667	0.141381	0.323112	-0.0231188	-0.208065	0.0125895	-0.116788	-0.182098	-0.032918	-0.149055	0.023435	-0.263486	0.159025	0.291216	-0.250147	0.259307	0.412662	0.126624	-0.27526	0.0386677	0.199993	0.148643	0.410114	-0.00560725	0.0700971	0.294946	0.197334	0.181173	-0.167706	0.230795	-0.0697297	0.0562273	0.080348	0.206341
C7	-0.230196	0.461832	0.0304405	0.086843	-0.454092	0.152464	1	0.221632	0.456462	0.566232	0.292864	0.51517	0.235987	-0.0835771	0.0947093	-0.201689	0.298818	-0.347436	-0.00441261	-0.323911	-0.210929	0.0286633	0.496163	-0.00742707	-0.306626	0.113894	0.187359	0.340858	-0.40084	0.24953	0.171323	-0.421574	0.273172	0.261324	0.133798	-0.10317	0.223936	0.696011	-0.229664	-0.078425	-0.213308	0.427352	-0.0411595	0.180954
C8	-0.0309457	0.15043	0.529127	0.051005	-0.37944	-0.0741412	0.221632	1	0.333032	0.374825	-0.148041	0.334582	0.160806	-0.180022	0.127098	-0.164631	0.268657	0.19877	0.0179014	-0.325071	-0.524884	-0.188209	0.29939	-0.0434365	-0.223291	-0.163772	-0.194619	-0.144095	-0.166301	-0.470506	-0.0743821	-0.23981	-0.398388	0.0946255	-0.307713	-0.534547	0.0485808	0.414513	-0.503052	-0.0285473	-0.230434	-0.263564	-0.158767	-0.572155
C9	-0.127197	0.251459	0.142431	-0.00978403	-0.258819	0.0991621	0.456462	0.333032	1	0.282277	0.157178	0.374883	0.113621	-0.0271257	0.063665	-0.154414	0.121675	-0.08697	0.125705	-0.10942	-0.380969	-0.000548482	0.313632	-0.0253192	-0.366172	0.00959032	-0.0975134	0.0406277	-0.149543	-0.0931088	0.0685668	-0.224404	-0.0314957	0.310892	-0.0282642	-0.217034	0.020606	0.30672	-0.392543	-0.020948	-0.232304	0.0672566	-0.036463	-0.145167
C10	-0.20531	0.37842	0.199441	0.087528	-0.411304	0.181273	0.566232	0.374825	0.282277	1	0.29484	0.52037	0.400071	-0.293806	0.0323266	-0.161719	0.256143	-0.140569	0.218406	-0.234252	-0.193022	-0.255179	0.49807	0.103372	-0.362475	0.173203	0.0839798	0.0922651	-0.44695	-0.151841	0.156343	-0.324012	0.27278	0.313789	-0.00542788	-0.0589659	0.303193	0.773433	-0.258138	0.0549335	-0.0500729	0.0154418	0.124722	-0.0277333
C11	-0.570911	-0.0408008	-0.198516	-0.0741386	0.509411	0.337667	0.292864	-0.148041	0.157178	0.29484	1	0.445402	0.775549	-0.358064	-0.689763	0.034227	-0.296691	-0.0382953	0.226244	-0.108861	-0.234941	-0.464963	0.563719	0.744641	-0.564135	0.719353	0.475219	0.308875	-0.551078	0.224627	0.414544	0.442914	0.801221	0.247204	-0.145603	0.75765	0.672108	0.491681	-0.104472	0.751888	0.029813	-0.223722	0.113328	0.255345
C12	-0.443076	0.443715	0.332216	0.0801083	-0.0401477	0.141381	0.51517	0.334582	0.374883	0.52037	0.445402	1	0.556796	-0.138306	-0.248401	-0.00494462	0.173053	-0.219907	-0.0284454	-0.4926	-0.520164	-0.274047	0.625891	0.43478	-0.430549	0.349045	0.253088	0.37199	-0.472163	0.115963	0.328303	-0.0688766	0.34382	0.148635	-0.283699	0.0505106	0.640324	0.72578	-0.184144	0.328326	-0.0472106	-0.0452687	-0.0835031	-0.0956615
C13	-0.656535	-0.0508951	0.148968	-0.143024	0.493795	0.323112	0.235987	0.160806	0.113621	0.400071	0.775549	0.556796	1	-0.45441	-0.804595	-0.113876	-0.251367	0.0663833	0.0491007	-0.419182	-0.541798	-0.797262	0.63401	0.900863	-0.646309	0.686593	0.541058	0.242629	-0.75865	-0.0523011	0.383166	0.441433	0.645597	0.0206281	-0.487219	0.531386	0.796598	0.704567	-0.391139	0.89737	-0.0716481	-0.527544	-0.136654	-0.141018
C14	0.152184	0.0952928	-0.00628596	0.17137	-0.140776	-0.0231188	-0.0835771	-0.180022	-0.0271257	-0.293806	-0.358064	-0.138306	-0.45441	1	0.284952	0.00177687	0.0374346	-0.25707	-0.271131	0.0364857	0.22456	0.392317	-0.30238	-0.332528	0.357941	-0.106386	-0.172743	0.159346	0.460711	0.295575	0.0855266	-0.260808	-0.257847	-0.245432	0.274949	-0.310356	-0.352337	-0.328169	0.219569	-0.408051	-0.0703746	0.344522	0.0857581	0.0160912
C15	0.544068	0.321788	0.0472743	0.179313	-0.822935	-0.208065	0.0947093	0.127098	0.063665	0.0323266	-0.689763	-0.248401	-0.804595	0.284952	1	0.198318	0.445599	-0.0405398	-0.073868	0.180072	0.426735	0.67365	-0.313971	-0.887772	0.414129	-0.663715	-0.590938	-0.11033	0.568688	-0.0266182	-0.344299	-0.72542	-0.572419	0.0873492	0.528081	-0.651459	-0.604205	-0.238523	0.311557	-0.903168	0.0018887	0.590859	0.245796	0.0789047
C16	-0.0741901	0.0435831	-0.100255	0.30061	0.0983447	0.0125895	-0.201689	-0.164631	-0.154414	-0.161719	0.034227	-0.00494462	-0.113876	0.00177687	0.198318	1	0.0918359	-0.0448025	-0.0657315	0.0509188	0.411631	0.202	0.193509	0.0503755	-0.0840539	-0.0999822	-0.132495	0.141256	0.293495	0.243425	-0.16288	0.0339408	0.0841406	-0.0289718	0.370158	0.19814	0.174644	-0.0948418	0.518349	-0.00965663	0.351065	0.0287749	0.338217	0.250238
C17	0.208687	0.261072	0.183728	0.274367	-0.490753	-0.116788	0.298818	0.268657	0.121675	0.256143	-0.296691	0.173053	-0.251367	0.0374346	0.445599	0.0918359	1	-0.256563	-0.374787	-0.282612	0.0863071	0.34876	0.0106897	-0.332726	0.0990141	-0.344756	0.0554153	0.273572	0.080311	0.0921216	-0.250575	-0.392178	-0.192433	-0.240964	0.112301	-0.368353	0.035444	0.214043	0.0217788	-0.47338	0.171151	0.325957	-0.0170681	0.0433121
C18	0.0380365	-0.285681	0.134269	-0.13047	0.13115	-0.182098	-0.347436	0.19877	-0.08697	-0.140569	-0.0382953	-0.219907	0.0663833	-0.25707	-0.0405398	-0.0448025	-0.256563	1	0.273827	0.227316	-0.155753	-0.269606	-0.0116917	0.0118702	-0.125194	0.118164	-0.385214	-0.339384	0.206916	-0.391479	-0.1324	0.0774236	-0.26226	0.212012	-0.162061	0.0260882	-0.0932382	-0.161813	-0.0676374	0.217055	-0.138185	-0.344296	0.215937	-0.334592
C19	0.00189897	-0.110584	-0.127637	0.0714423	0.0342037	-0.032918	-0.00441261	0.0179014	0.125705	0.218406	0.226244	-0.0284454	0.0491007	-0.271131	-0.073868	-0.0657315	-0.374787	0.273827	1	0.572411	0.041178	-0.0693592	0.205033	-0.0345097	-0.221941	0.178336	-0.324586	-0.50483	0.0731734	-0.224076	0.0834818	0.070297	0.0867402	0.895082	0.126397	0.174542	-0.130053	-0.0533345	0.0176878	0.124702	0.129785	-0.136772	0.313716	-0.0149582
C20	0.314561	-0.217727	-0.2302	-0.105897	0.0309052	-0.149055	-0.323911	-0.325071	-0.10942	-0.234252	-0.108861	-0.4926	-0.419182	0.0364857	0.180072	0.0509188	-0.282612	0.227316	0.572411	1	0.375006	0.226231	-0.317498	-0.349223	0.25431	-0.141654	-0.454494	-0.437202	0.385104	-0.0130135	-0.204724	0.00088143	-0.10211	0.434291	0.236531	0.116739	-0.470879	-0.558981	0.273055	-0.228089	0.235686	0.0623625	0.381803	0.192907
C21	0.344838	-0.0587554	-0.586486	0.320403	-0.118013	0.023435	-0.210929	-0.524884	-0.380969	-0.193022	-0.234941	-0.520164	-0.541798	0.22456	0.426735	0.411631	0.0863071	-0.155753	0.041178	0.375006	1	0.459781	-0.329867	-0.435596	0.351426	-0.281157	-0.0983345	-0.0680623	0.566441	0.187708	-0.198833	-0.157751	0.0915611	-0.0330073	0.830556	0.15437	-0.359479	-0.45334	0.654476	-0.4462	0.310459	0.467092	0.409771	0.575286
C22	0.471232	0.159095	-0.151693	0.282303	-0.418489	-0.263486	0.0286633	-0.188209	-0.000548482	-0.255179	-0.464963	-0.274047	-0.797262	0.392317	0.67365	0.202	0.34876	-0.269606	-0.0693592	0.226231	0.459781	1	-0.380842	-0.695676	0.444419	-0.477183	-0.277326	0.0851542	0.559983	0.335672	-0.232781	-0.299978	-0.360821	0.0391571	0.471534	-0.337171	-0.464672	-0.446028	0.405956	-0.762048	0.12837	0.636363	0.0861013	0.26877
C23	-0.457317	0.209769	0.164515	0.279321	0.0705548	0.159025	0.496163	0.29939	0.313632	0.49807	0.563719	0.625891	0.63401	-0.30238	-0.313971	0.193509	0.0106897	-0.0116917	0.205033	-0.317498	-0.329867	-0.380842	1	0.497214	-0.608007	0.328996	0.171686	0.157265	-0.465627	-0.0631987	0.211803	0.0198146	0.409882	0.297363	-0.0891144	0.202585	0.584483	0.703551	-0.142806	0.469793	0.0451054	-0.162122	0.0853185	-0.102455
C24	-0.665032	-0.161113	0.05879	-0.0803816	0.762891	0.291216	-0.00742707	-0.0434365	-0.0253192	0.103372	0.744641	0.43478	0.900863	-0.332528	-0.887772	0.0503755	-0.332726	0.0118702	-0.0345097	-0.349223	-0.435596	-0.695676	0.497214	1	-0.554503	0.693821	0.626672	0.265091	-0.616288	0.101059	0.432423	0.645057	0.631045	-0.113745	-0.47965	0.66708	0.789387	0.428719	-0.218256	0.932735	0.0035826	-0.545739	-0.199431	-0.0802984
C25	0.509458	0.0508475	-0.000239358	-0.0184214	-0.182902	-0.250147	-0.306626	-0.223291	-0.366172	-0.362475	-0.564135	-0.430549	-0.646309	0.357941	0.414129	-0.0840539	0.0990141	-0.125194	-0.221941	0.25431	0.351426	0.444419	-0.608007	-0.554503	1	-0.463929	-0.161077	-0.112704	0.394246	0.0744619	-0.118811	-0.0694359	-0.385273	-0.33058	0.0549829	-0.281847	-0.428231	-0.550206	0.424464	-0.57731	0.186504	0.394716	0.00829729	0.148677
C26	-0.578354	-0.0808777	-0.119915	-0.106843	0.561589	0.259307	0.113894	-0.163772	0.00959032	0.173203	0.719353	0.349045	0.686593	-0.106386	-0.663715	-0.0999822	-0.344756	0.118164	0.178336	-0.141654	-0.281157	-0.477183	0.328996	0.693821	-0.463929	1	0.451364	0.314061	-0.435536	0.322526	0.467183	0.415018	0.622581	0.156103	-0.281139	0.673572	0.564934	0.343283	-0.117243	0.711217	-0.0417402	-0.245752	0.125187	0.108083
C27	-0.334921	-0.108162	-0.141787	0.0990357	0.507834	0.412662	0.187359	-0.194619	-0.0975134	0.0839798	0.475219	0.253088	0.541058	-0.172743	-0.590938	-0.132495	0.0554153	-0.385214	-0.324586	-0.454494	-0.0983345	-0.277326	0.171686	0.626672	-0.161077	0.451364	1	0.419525	-0.550538	0.311547	0.372471	0.536295	0.591163	-0.383209	-0.255619	0.531894	0.600119	0.294536	-0.157915	0.467478	0.120659	-0.0294421	-0.328432	0.19604
C28	-0.29706	0.271348	0.0038911	0.0527525	0.0600373	0.126624	0.340858	-0.144095	0.0406277	0.0922651	0.308875	0.37199	0.242629	0.159346	-0.11033	0.141256	0.273572	-0.339384	-0.50483	-0.437202	-0.0680623	0.0851542	0.157265	0.265091	-0.112704	0.314061	0.419525	1	-0.260012	0.58682	0.199708	0.0468755	0.407606	-0.340364	-0.041637	0.224372	0.487523	0.380123	0.109933	0.116861	0.0870117	0.25408	-0.0534106	0.315775
C29	0.472695	-0.0672734	-0.210059	0.261792	-0.209439	-0.27526	-0.40084	-0.166301	-0.149543	-0.44695	-0.551078	-0.472163	-0.75865	0.460711	0.568688	0.293495	0.080311	0.206916	0.0731734	0.385104	0.566441	0.559983	-0.465627	-0.616288	0.394246	-0.435536	-0.550538	-0.260012	1	-0.00574438	-0.268387	-0.230647	-0.465445	0.0570782	0.541456	-0.289099	-0.599025	-0.673742	0.532662	-0.564245	0.085309	0.310242	0.324092	0.156013
C30	-0.169305	0.173547	-0.138246	0.0630873	0.131644	0.0386677	0.24953	-0.470506	-0.0931088	-0.151841	0.224627	0.115963	-0.0523011	0.295575	-0.0266182	0.243425	0.0921216	-0.391479	-0.224076	-0.0130135	0.187708	0.335672	-0.0631987	0.101059	0.0744619	0.322526	0.311547	0.58682	-0.00574438	1	0.253578	0.0329091	0.379201	-0.0813135	0.142384	0.36519	0.248577	0.0174525	0.3797	-0.0352507	0.113345	0.452141	0.0831426	0.500217
C31	-0.352267	0.174689	0.00355066	0.0262613	0.274835	0.199993	0.171323	-0.0743821	0.0685668	0.156343	0.414544	0.328303	0.383166	0.0855266	-0.344299	-0.16288	-0.250575	-0.1324	0.0834818	-0.204724	-0.198833	-0.232781	0.211803	0.432423	-0.118811	0.467183	0.372471	0.199708	-0.268387	0.253578	1	0.200474	0.377856	0.127374	-0.0988422	0.304063	0.36689	0.242689	0.0430371	0.345551	-0.182531	0.0703793	-0.108636	0.0335134
C32	-0.242315	-0.452241	-0.103053	-0.0947609	0.859941	0.148643	-0.421574	-0.23981	-0.224404	-0.324012	0.442914	-0.0688766	0.441433	-0.260808	-0.72542	0.0339408	-0.392178	0.0774236	0.070297	0.00088143	-0.157751	-0.299978	0.0198146	0.645057	-0.0694359	0.415018	0.536295	0.0468755	-0.230647	0.0329091	0.200474	1	0.368646	-0.166548	-0.43924	0.628321	0.417877	-0.17251	-0.0325982	0.655986	0.205137	-0.472987	-0.178694	0.0584011
C33	-0.457517	0.0239434	-0.307915	-0.0144422	0.440973	0.410114	0.273172	-0.398388	-0.0314957	0.27278	0.801221	0.34382	0.645597	-0.257847	-0.572419	0.0841406	-0.192433	-0.26226	0.0867402	-0.10211	0.0915611	-0.360821	0.409882	0.631045	-0.385273	0.622581	0.591163	0.407606	-0.465445	0.379201	0.377856	0.368646	1	0.0739413	0.0457521	0.79124	0.650102	0.427679	0.137062	0.58417	0.210018	0.0114265	0.166451	0.534931
C34	-0.0338543	0.138963	-0.0956547	0.0784661	-0.183693	-0.00560725	0.261324	0.0946255	0.310892	0.313789	0.247204	0.148635	0.0206281	-0.245432	0.0873492	-0.0289718	-0.240964	0.212012	0.895082	0.434291	-0.0330073	0.0391571	0.297363	-0.113745	-0.33058	0.156103	-0.383209	-0.340364	0.0570782	-0.0813135	0.127374	-0.166548	0.0739413	1	0.225447	0.0672165	-0.119865	0.103296	0.0123176	0.0173556	-0.0277245	0.0645889	0.330576	0.0440558
C35	0.23282	0.155272	-0.591749	0.371242	-0.360774	0.0700971	0.133798	-0.307713	-0.0282642	-0.00542788	-0.145603	-0.283699	-0.487219	0.274949	0.528081	0.370158	0.112301	-0.162061	0.126397	0.236531	0.830556	0.471534	-0.0891144	-0.47965	0.0549829	-0.281139	-0.255619	-0.041637	0.541456	0.142384	-0.0988422	-0.43924	0.0457521	0.225447	1	-0.0361968	-0.397161	-0.213183	0.46214	-0.471986	0.0282529	0.559323	0.404744	0.480536
C36	-0.39596	-0.252235	-0.378249	-0.0716353	0.739196	0.294946	-0.10317	-0.534547	-0.217034	-0.0589659	0.75765	0.0505106	0.531386	-0.310356	-0.651459	0.19814	-0.368353	0.0260882	0.174542	0.116739	0.15437	-0.337171	0.202585	0.66708	-0.281847	0.673572	0.531894	0.224372	-0.289099	0.36519	0.304063	0.628321	0.79124	0.0672165	-0.0361968	1	0.544868	0.0525654	0.229523	0.671694	0.24846	-0.162242	0.211821	0.485644
C37	-0.558029	0.096772	0.216152	0.0625193	0.445952	0.197334	0.223936	0.0485808	0.020606	0.303193	0.672108	0.640324	0.796598	-0.352337	-0.604205	0.174644	0.035444	-0.0932382	-0.130053	-0.470879	-0.359479	-0.464672	0.584483	0.789387	-0.428231	0.564934	0.600119	0.487523	-0.599025	0.248577	0.36689	0.417877	0.650102	-0.119865	-0.397161	0.544868	1	0.634366	-0.0495797	0.701164	0.198084	-0.26158	-0.0606561	0.0494415
C38	-0.482415	0.358902	0.297117	0.0217056	-0.207204	0.181173	0.696011	0.414513	0.30672	0.773433	0.491681	0.72578	0.704567	-0.328169	-0.238523	-0.0948418	0.214043	-0.161813	-0.0533345	-0.558981	-0.45334	-0.446028	0.703551	0.428719	-0.550206	0.343283	0.294536	0.380123	-0.673742	0.0174525	0.242689	-0.17251	0.427679	0.103296	-0.213183	0.0525654	0.634366	1	-0.357743	0.364958	-0.127357	-0.0991557	-0.0579371	-0.0982383
C39	0.195559	0.137979	-0.235952	0.239708	0.039266	-0.167706	-0.229664	-0.503052	-0.392543	-0.258138	-0.104472	-0.184144	-0.391139	0.219569	0.311557	0.518349	0.0217788	-0.0676374	0.0176878	0.273055	0.654476	0.405956	-0.142806	-0.218256	0.424464	-0.117243	-0.157915	0.109933	0.532662	0.3797	0.0430371	-0.0325982	0.137062	0.0123176	0.46214	0.229523	-0.0495797	-0.357743	1	-0.265003	0.368714	0.487298	0.421105	0.522449
C40	-0.614147	-0.283243	0.00928851	-0.169665	0.768551	0.230795	-0.078425	-0.0285473	-0.020948	0.0549335	0.751888	0.328326	0.89737	-0.408051	-0.903168	-0.00965663	-0.47338	0.217055	0.124702	-0.228089	-0.4462	-0.762048	0.469793	0.932735	-0.57731	0.711217	0.467478	0.116861	-0.564245	-0.0352507	0.345551	0.655986	0.58417	0.0173556	-0.471986	0.671694	0.701164	0.364958	-0.265003	1	-0.0192705	-0.647148	-0.11795	-0.13118
C41	0.10186	-0.112816	1.72691e-05	0.24916	0.17127	-0.0697297	-0.213308	-0.230434	-0.232304	-0.0500729	0.029813	-0.0472106	-0.0716481	-0.0703746	0.0018887	0.351065	0.171151	-0.138185	0.129785	0.235686	0.310459	0.12837	0.0451054	0.0035826	0.186504	-0.0417402	0.120659	0.0870117	0.085309	0.113345	-0.182531	0.205137	0.210018	-0.0277245	0.0282529	0.24846	0.198084	-0.127357	0.368714	-0.0192705	1	0.018636	0.248219	0.229982
C42	0.30475	0.456262	-0.235326	0.219669	-0.501243	0.0562273	0.427352	-0.263564	0.0672566	0.0154418	-0.223722	-0.0452687	-0.527544	0.344522	0.590859	0.0287749	0.325957	-0.344296	-0.136772	0.0623625	0.467092	0.636363	-0.162122	-0.545739	0.394716	-0.245752	-0.0294421	0.25408	0.310242	0.452141	0.0703793	-0.472987	0.0114265	0.0645889	0.559323	-0.162242	-0.26158	-0.0991557	0.487298	-0.647148	0.018636	1	0.209185	0.514623
C43	0.102884	0.0763753	-0.157907	0.0245132	-0.133705	0.080348	-0.0411595	-0.158767	-0.036463	0.124722	0.113328	-0.0835031	-0.136654	0.0857581	0.245796	0.338217	-0.0170681	0.215937	0.313716	0.381803	0.409771	0.0861013	0.0853185	-0.199431	0.00829729	0.125187	-0.328432	-0.0534106	0.324092	0.0831426	-0.108636	-0.178694	0.166451	0.330576	0.404744	0.211821	-0.0606561	-0.0579371	0.421105	-0.11795	0.248219	0.209185	1	0.344018
C44	0.0129921	0.180861	-0.536471	0.00452503	0.0393895	0.206341	0.180954	-0.572155	-0.145167	-0.0277333	0.255345	-0.0956615	-0.141018	0.0160912	0.0789047	0.250238	0.0433121	-0.334592	-0.0149582	0.192907	0.575286	0.26877	-0.102455	-0.0802984	0.148677	0.108083	0.19604	0.315775	0.156013	0.500217	0.0335134	0.0584011	0.534931	0.0440558	0.480536	0.485644	0.0494415	-0.0982383	0.522449	-0.13118	0.229982	0.514623	0.344018	1

## Sheet: NREMS(control)
	C01	C02	C03	C04	C05	C06	C07	C08	C09	C10	C11	C12	C13	C14	C15	C16	C17	C18	C19	C20	C21	C22	C23	C24	C25	C26	C27	C28	C29	C30	C31	C32	C33	C34	C35	C36	C37	C38
C01	0	-0.0488795	-0.0525213	0.149019	0.202718	0.138163	0.162684	0.133126	0.394429	0.25448	0.124683	0.187638	0.050638	0.128826	0.301369	0.237377	0.201183	0.0276416	0.156897	0.120759	0.18304	0.153061	0.0355701	0.11208	0.0809474	0.0740824	-0.0960646	0.105476	0.125996	0.00700155	0.122348	0.184124	0.0571666	0.214046	0.266321	0.245416	0.235565	-0.193424
C02	-0.0488795	0	0.0717322	-0.0565351	-0.0136209	-0.060816	-0.0320702	-0.0115944	-0.055006	-0.0993137	0.0326727	-0.112842	0.0534503	0.0209882	-0.0158273	-0.0385155	-0.0593913	0.0619387	-0.0664813	0.0863588	-0.0564895	-0.111448	0.13988	-0.157678	-0.0299598	0.00860098	0.0971459	0.0733638	-0.0279826	0.116567	0.0459808	-0.0046469	0.102608	0.0175991	0.00109548	-0.00704637	0.0290913	-0.0195292
C03	-0.0525213	0.0717322	0	-0.0350759	-0.074235	-0.0393026	-0.00976005	-0.0623561	9.52736e-06	-0.0198826	0.108525	-0.069403	0.0910835	0.0493546	-0.00955235	-0.0601607	-0.028891	-0.126419	-0.0544689	0.026853	0.0107362	-0.037845	0.0901209	-0.0843115	-0.0937423	0.0726477	0.441267	-0.140077	-0.134495	0.0698828	0.0893503	-0.0594594	-0.0488371	0.0330192	-0.0665074	-0.0394631	0.0273108	-0.000154753
C04	0.149019	-0.0565351	-0.0350759	0	0.304542	0.296838	0.483718	0.168828	0.333149	0.283923	0.129631	0.396365	-0.0233572	0.303323	0.276951	0.206806	0.326272	-0.0515231	0.31542	-0.0814171	0.330708	0.465267	0.178846	0.183921	0.249776	-0.146915	-0.155328	0.0179837	0.247482	-0.0710698	0.154919	0.304052	-0.111379	0.112497	0.293571	0.335628	0.277004	-0.201984
C05	0.202718	-0.0136209	-0.074235	0.304542	0	0.257908	0.225899	0.169921	0.283155	0.272505	0.107052	0.344501	0.0894079	0.217887	0.313966	0.260781	0.508004	0.118184	0.324797	0.100793	0.236294	0.208347	0.175216	0.153373	0.249247	0.0326083	-0.108838	0.161763	0.264438	-0.0143528	0.0691118	0.26584	0.0309614	0.196514	0.239505	0.277447	0.247943	-0.175297
C06	0.138163	-0.060816	-0.0393026	0.296838	0.257908	0	0.223366	0.195752	0.26815	0.225458	0.182285	0.368016	-0.026613	0.237436	0.223037	0.214889	0.304544	-0.0557738	0.310879	0.0417233	0.159517	0.251945	0.209747	0.184162	0.311031	-0.0790767	-0.124553	-0.0376108	0.342524	-0.0519554	0.0584543	0.330368	-0.0147126	0.196849	0.329542	0.290337	0.245273	-0.159274
C07	0.162684	-0.0320702	-0.00976005	0.483718	0.225899	0.223366	0	0.225942	0.400719	0.263881	0.190187	0.278073	0.0461034	0.400309	0.310132	0.210213	0.235572	-0.0590744	0.254349	0.0146019	0.358053	0.443125	0.1361	0.112804	0.133097	-0.0780732	-0.105231	-0.00764095	0.248489	-0.0110475	0.277562	0.352455	-0.00436066	0.127429	0.283363	0.341935	0.400718	-0.251722
C08	0.133126	-0.0115944	-0.0623561	0.168828	0.169921	0.195752	0.225942	0	0.252325	0.212647	0.246418	0.253039	0.105844	0.270344	0.258065	0.303939	0.157998	0.0540248	0.18335	0.0941474	0.163172	0.150932	0.094635	0.111787	0.158405	0.0495517	-0.0549701	0.0506519	0.302434	0.11064	0.0811079	0.358608	0.166641	0.179519	0.275901	0.211877	0.346876	-0.135353
C09	0.394429	-0.055006	9.52736e-06	0.333149	0.283155	0.26815	0.400719	0.252325	0	0.326594	0.300242	0.294658	0.0882694	0.341468	0.431176	0.301951	0.31742	-0.0689722	0.270578	0.0625974	0.258509	0.313495	0.101656	0.121728	0.127935	0.0077874	-0.0729477	0.0330658	0.254273	0.0217427	0.219405	0.400782	0.0759565	0.26409	0.41457	0.503185	0.443417	-0.378834
C10	0.25448	-0.0993137	-0.0198826	0.283923	0.272505	0.225458	0.263881	0.212647	0.326594	0	0.107021	0.424825	0.0890162	0.222283	0.377207	0.348351	0.297165	0.0776861	0.287177	0.0734313	0.430328	0.316681	0.131769	0.260666	0.249262	0.0756436	-0.0653255	0.128982	0.238801	-0.00986849	0.144149	0.280303	-0.00518587	0.141898	0.196336	0.235189	0.314989	-0.21716
C11	0.124683	0.0326727	0.108525	0.129631	0.107052	0.182285	0.190187	0.246418	0.300242	0.107021	0	0.104709	0.0542412	0.41327	0.303051	0.279001	0.101064	-0.208681	0.0998992	0.0927009	0.0457556	0.0962129	0.136766	0.0193884	-0.0100779	-0.0176477	0.144265	0.00545454	0.207939	0.123576	0.256965	0.379923	0.272126	0.202581	0.247112	0.286928	0.305081	-0.156404
C12	0.187638	-0.112842	-0.069403	0.396365	0.344501	0.368016	0.278073	0.253039	0.294658	0.424825	0.104709	0	0.0736129	0.200101	0.305532	0.329596	0.44634	0.0394232	0.344759	-0.00868683	0.31657	0.383886	0.216253	0.371823	0.429425	0.0129023	-0.168682	0.026378	0.351986	-0.0429276	0.0442855	0.297986	-0.0754597	0.130644	0.284399	0.232072	0.258504	-0.165128
C13	0.050638	0.0534503	0.0910835	-0.0233572	0.0894079	-0.026613	0.0461034	0.105844	0.0882694	0.0890162	0.0542412	0.0736129	0	0.037629	0.129656	0.108937	0.138876	0.113217	0.0744684	0.144262	0.112538	0.0147753	0.0710108	0.0286838	-0.00329023	0.488477	0.123946	0.0489373	-0.0242613	0.213231	0.0994029	0.0197251	0.062518	0.0470572	0.0559222	0.0139333	0.117936	-0.0728997
C14	0.128826	0.0209882	0.0493546	0.303323	0.217887	0.237436	0.400309	0.270344	0.341468	0.222283	0.41327	0.200101	0.037629	0	0.401562	0.337419	0.186377	-0.105155	0.211045	0.104265	0.240536	0.264636	0.201827	0.0418301	0.1059	-0.054462	0.0579808	0.0281144	0.314036	0.0765321	0.323064	0.53776	0.187068	0.199392	0.228618	0.333545	0.448389	-0.171808
C15	0.301369	-0.0158273	-0.00955235	0.276951	0.313966	0.223037	0.310132	0.258065	0.431176	0.377207	0.303051	0.305532	0.129656	0.401562	0	0.4815	0.270512	0.016881	0.236682	0.121614	0.339402	0.265951	0.15422	0.171889	0.137885	0.0431434	-0.00523395	0.180986	0.250781	0.0826789	0.321163	0.46516	0.172217	0.159121	0.251182	0.368161	0.46421	-0.315821
C16	0.237377	-0.0385155	-0.0601607	0.206806	0.260781	0.214889	0.210213	0.303939	0.301951	0.348351	0.279001	0.329596	0.108937	0.337419	0.4815	0	0.231633	0.0188656	0.193989	0.134639	0.265852	0.225899	0.146001	0.213723	0.207528	0.0757598	-0.00369045	0.162781	0.310498	0.113357	0.205036	0.432756	0.167672	0.168515	0.220054	0.21307	0.357331	-0.138959
C17	0.201183	-0.0593913	-0.028891	0.326272	0.508004	0.304544	0.235572	0.157998	0.31742	0.297165	0.101064	0.44634	0.138876	0.186377	0.270512	0.231633	0	0.0379316	0.373645	0.0178801	0.219441	0.220312	0.223746	0.162277	0.312765	0.0694963	-0.124916	0.0286269	0.275438	-0.0454367	0.0388768	0.226573	-0.0707191	0.208035	0.306647	0.288161	0.203269	-0.179564
C18	0.0276416	0.0619387	-0.126419	-0.0515231	0.118184	-0.0557738	-0.0590744	0.0540248	-0.0689722	0.0776861	-0.208681	0.0394232	0.113217	-0.105155	0.016881	0.0188656	0.0379316	0	0.0709988	0.141986	0.117212	-0.0352169	-0.0328391	0.0370083	0.116821	0.17497	-0.0803323	0.253842	0.00451013	0.0688955	-0.134876	-0.0472668	0.0326718	0.0300371	-0.0562382	-0.0616243	0.0322779	-0.00449038
C19	0.156897	-0.0664813	-0.0544689	0.31542	0.324797	0.310879	0.254349	0.18335	0.270578	0.287177	0.0998992	0.344759	0.0744684	0.211045	0.236682	0.193989	0.373645	0.0709988	0	0.0479888	0.257948	0.260479	0.184644	0.140277	0.278874	0.0522808	-0.0975055	0.0791169	0.222053	-0.0152738	0.0247681	0.259579	-0.0329756	0.23619	0.27566	0.259181	0.237953	-0.132792
C20	0.120759	0.0863588	0.026853	-0.0814171	0.100793	0.0417233	0.0146019	0.0941474	0.0625974	0.0734313	0.0927009	-0.00868683	0.144262	0.104265	0.121614	0.134639	0.0178801	0.141986	0.0479888	0	0.0743288	-0.0101256	0.0732327	0.0317485	0.0174526	0.189713	0.128274	0.130025	0.0350395	0.188841	0.112082	0.0892174	0.243959	0.182759	0.014012	-0.000588087	0.186498	-0.0260395
C21	0.18304	-0.0564895	0.0107362	0.330708	0.236294	0.159517	0.358053	0.163172	0.258509	0.430328	0.0457556	0.31657	0.112538	0.240536	0.339402	0.265852	0.219441	0.117212	0.257948	0.0743288	0	0.396651	0.111322	0.226456	0.21586	0.0469313	-0.0508536	0.0960315	0.129408	0.0278886	0.225791	0.235963	-0.0430737	0.0786795	0.111342	0.169642	0.377689	-0.210622
C22	0.153061	-0.111448	-0.037845	0.465267	0.208347	0.251945	0.443125	0.150932	0.313495	0.316681	0.0962129	0.383886	0.0147753	0.264636	0.265951	0.225899	0.220312	-0.0352169	0.260479	-0.0101256	0.396651	0	0.115406	0.282708	0.222044	-0.0777053	-0.12715	-0.00972229	0.212117	-0.0230136	0.190182	0.289362	-0.0776037	0.0873841	0.190768	0.207607	0.315805	-0.219402
C23	0.0355701	0.13988	0.0901209	0.178846	0.175216	0.209747	0.1361	0.094635	0.101656	0.131769	0.136766	0.216253	0.0710108	0.201827	0.15422	0.146001	0.223746	-0.0328391	0.184644	0.0732327	0.111322	0.115406	0	0.0923207	0.209262	0.0109449	0.0274895	-0.0272377	0.188642	0.0279198	0.0729965	0.178949	-0.0115921	0.0980533	0.204307	0.139278	0.145849	-0.0410961
C24	0.11208	-0.157678	-0.0843115	0.183921	0.153373	0.184162	0.112804	0.111787	0.121728	0.260666	0.0193884	0.371823	0.0286838	0.0418301	0.171889	0.213723	0.162277	0.0370083	0.140277	0.0317485	0.226456	0.282708	0.0923207	0	0.230732	0.0246406	-0.111634	0.0317488	0.124079	0.0107639	0.0410016	0.114969	-0.0666814	0.0140049	0.10788	0.051103	0.143811	-0.10709
C25	0.0809474	-0.0299598	-0.0937423	0.249776	0.249247	0.311031	0.133097	0.158405	0.127935	0.249262	-0.0100779	0.429425	-0.00329023	0.1059	0.137885	0.207528	0.312765	0.116821	0.278874	0.0174526	0.21586	0.222044	0.209262	0.230732	0	-0.0276936	-0.177369	0.00941507	0.309101	-0.0452248	-0.0804599	0.189688	-0.10019	0.148393	0.16526	0.117658	0.161225	-0.0774985
C26	0.0740824	0.00860098	0.0726477	-0.146915	0.0326083	-0.0790767	-0.0780732	0.0495517	0.0077874	0.0756436	-0.0176477	0.0129023	0.488477	-0.054462	0.0431434	0.0757598	0.0694963	0.17497	0.0522808	0.189713	0.0469313	-0.0777053	0.0109449	0.0246406	-0.0276936	0	0.144809	0.0837217	-0.0545876	0.205832	-0.00324727	-0.0776662	0.076476	0.0493246	-0.00834474	-0.0873864	0.032306	0.0448833
C27	-0.0960646	0.0971459	0.441267	-0.155328	-0.108838	-0.124553	-0.105231	-0.0549701	-0.0729477	-0.0653255	0.144265	-0.168682	0.123946	0.0579808	-0.00523395	-0.00369045	-0.124916	-0.0803323	-0.0975055	0.128274	-0.0508536	-0.12715	0.0274895	-0.111634	-0.177369	0.144809	0	-0.0158208	-0.171124	0.208717	0.114361	-0.0496335	0.110478	0.030351	-0.146531	-0.106512	0.00866317	0.0634648
C28	0.105476	0.0733638	-0.140077	0.0179837	0.161763	-0.0376108	-0.00764095	0.0506519	0.0330658	0.128982	0.00545454	0.026378	0.0489373	0.0281144	0.180986	0.162781	0.0286269	0.253842	0.0791169	0.130025	0.0960315	-0.00972229	-0.0272377	0.0317488	0.00941507	0.0837217	-0.0158208	0	0.0275804	0.099697	0.0732761	0.0888043	0.182149	0.0204321	-0.00215112	0.0674264	0.0958626	-0.0578649
C29	0.125996	-0.0279826	-0.134495	0.247482	0.264438	0.342524	0.248489	0.302434	0.254273	0.238801	0.207939	0.351986	-0.0242613	0.314036	0.250781	0.310498	0.275438	0.00451013	0.222053	0.0350395	0.129408	0.212117	0.188642	0.124079	0.309101	-0.0545876	-0.171124	0.0275804	0	-0.034554	0.0451318	0.392574	0.101568	0.177556	0.302842	0.277898	0.257309	-0.119125
C30	0.00700155	0.116567	0.0698828	-0.0710698	-0.0143528	-0.0519554	-0.0110475	0.11064	0.0217427	-0.00986849	0.123576	-0.0429276	0.213231	0.0765321	0.0826789	0.113357	-0.0454367	0.0688955	-0.0152738	0.188841	0.0278886	-0.0230136	0.0279198	0.0107639	-0.0452248	0.205832	0.208717	0.099697	-0.034554	0	0.106631	0.05065	0.191608	0.0887201	0.0209145	-0.0380086	0.13303	0.00139893
C31	0.122348	0.0459808	0.0893503	0.154919	0.0691118	0.0584543	0.277562	0.0811079	0.219405	0.144149	0.256965	0.0442855	0.0994029	0.323064	0.321163	0.205036	0.0388768	-0.134876	0.0247681	0.112082	0.225791	0.190182	0.0729965	0.0410016	-0.0804599	-0.00324727	0.114361	0.0732761	0.0451318	0.106631	0	0.237883	0.127878	0.00922722	0.0806898	0.166477	0.2869	-0.188858
C32	0.184124	-0.0046469	-0.0594594	0.304052	0.26584	0.330368	0.352455	0.358608	0.400782	0.280303	0.379923	0.297986	0.0197251	0.53776	0.46516	0.432756	0.226573	-0.0472668	0.259579	0.0892174	0.235963	0.289362	0.178949	0.114969	0.189688	-0.0776662	-0.0496335	0.0888043	0.392574	0.05065	0.237883	0	0.186698	0.224366	0.307651	0.403711	0.476527	-0.263715
C33	0.0571666	0.102608	-0.0488371	-0.111379	0.0309614	-0.0147126	-0.00436066	0.166641	0.0759565	-0.00518587	0.272126	-0.0754597	0.062518	0.187068	0.172217	0.167672	-0.0707191	0.0326718	-0.0329756	0.243959	-0.0430737	-0.0776037	-0.0115921	-0.0666814	-0.10019	0.076476	0.110478	0.182149	0.101568	0.191608	0.127878	0.186698	0	0.112686	0.0233013	0.0791219	0.188309	-0.0675224
C34	0.214046	0.0175991	0.0330192	0.112497	0.196514	0.196849	0.127429	0.179519	0.26409	0.141898	0.202581	0.130644	0.0470572	0.199392	0.159121	0.168515	0.208035	0.0300371	0.23619	0.182759	0.0786795	0.0873841	0.0980533	0.0140049	0.148393	0.0493246	0.030351	0.0204321	0.177556	0.0887201	0.00922722	0.224366	0.112686	0	0.243582	0.219201	0.247351	-0.117535
C35	0.266321	0.00109548	-0.0665074	0.293571	0.239505	0.329542	0.283363	0.275901	0.41457	0.196336	0.247112	0.284399	0.0559222	0.228618	0.251182	0.220054	0.306647	-0.0562382	0.27566	0.014012	0.111342	0.190768	0.204307	0.10788	0.16526	-0.00834474	-0.146531	-0.00215112	0.302842	0.0209145	0.0806898	0.307651	0.0233013	0.243582	0	0.445045	0.26799	-0.199206
C36	0.245416	-0.00704637	-0.0394631	0.335628	0.277447	0.290337	0.341935	0.211877	0.503185	0.235189	0.286928	0.232072	0.0139333	0.333545	0.368161	0.21307	0.288161	-0.0616243	0.259181	-0.000588087	0.169642	0.207607	0.139278	0.051103	0.117658	-0.0873864	-0.106512	0.0674264	0.277898	-0.0380086	0.166477	0.403711	0.0791219	0.219201	0.445045	0	0.334549	-0.37784
C37	0.235565	0.0290913	0.0273108	0.277004	0.247943	0.245273	0.400718	0.346876	0.443417	0.314989	0.305081	0.258504	0.117936	0.448389	0.46421	0.357331	0.203269	0.0322779	0.237953	0.186498	0.377689	0.315805	0.145849	0.143811	0.161225	0.032306	0.00866317	0.0958626	0.257309	0.13303	0.2869	0.476527	0.188309	0.247351	0.26799	0.334549	0	-0.317175
C38	-0.193424	-0.0195292	-0.000154753	-0.201984	-0.175297	-0.159274	-0.251722	-0.135353	-0.378834	-0.21716	-0.156404	-0.165128	-0.0728997	-0.171808	-0.315821	-0.138959	-0.179564	-0.00449038	-0.132792	-0.0260395	-0.210622	-0.219402	-0.0410961	-0.10709	-0.0774985	0.0448833	0.0634648	-0.0578649	-0.119125	0.00139893	-0.188858	-0.263715	-0.0675224	-0.117535	-0.199206	-0.37784	-0.317175	0

## Sheet: REMS (control)
	C1	C2	C3	C4	C5	C6	C7	C8	C9	C10	C11	C12	C13	C14	C15	C16	C17	C18	C19	C20	C21	C22	C23	C24	C25	C26	C27	C28	C29	C30	C31	C32	C33	C34	C35	C36	C37	C38
C1	0	0.0052022	-0.05139	-0.0854253	0.0266965	-0.0182944	-0.0881317	0.179386	0.379446	0.204233	0.127606	0.159031	-0.152727	-0.104234	0.186786	0.0513171	-0.0492122	-0.0221026	-0.0320436	-0.00753163	-0.0774785	-0.00171432	0.237647	0.117874	-0.144614	0.0459871	-0.0646352	-0.0951271	0.0915649	0.086987	0.172593	0.14263	0.0549991	0.0403168	0.00597584	0.010585	-0.0541799	0.218979
C2	0.0052022	0	-0.0711676	-0.124812	0.0882876	-0.0479186	-0.123758	-0.0383579	-0.0567946	0.00996244	-0.0486293	0.103729	0.0574955	-0.0700067	-0.0359521	-0.128807	0.134994	-0.0354616	-0.0824908	-0.113673	-0.124983	-0.0341217	0.0959668	0.00645407	-0.0752114	-0.0812169	-0.0845866	-0.0731855	-0.126238	0.103408	-0.0666786	-0.133254	-0.115042	0.163989	0.00379805	-0.106546	-0.111519	-0.00556504
C3	-0.05139	-0.0711676	0	0.0907517	-0.0861798	0.0433367	0.0587777	-0.191446	0.16298	-0.0306636	0.309692	-0.355217	-0.0609247	0.118399	0.131312	0.250197	-0.14773	0.356687	-0.0152365	0.201639	0.273463	0.129742	-0.162496	0.0662639	0.478405	0.22349	0.865627	0.0847611	0.163411	-0.119835	-0.099353	0.105578	0.535681	0.0129321	0.316692	0.159287	0.40111	-0.0234095
C4	-0.0854253	-0.124812	0.0907517	0	-0.0580521	0.526613	0.615916	0.0225163	0.112732	0.0152315	0.20049	-0.126305	-0.132965	0.60641	-0.0380108	0.263168	-0.155796	0.159096	0.527754	0.372321	0.608885	-0.042752	-0.129545	0.0758706	0.274283	0.0794645	0.168405	0.284769	0.275279	-0.135345	0.10442	0.328497	0.178895	-0.109706	0.167374	0.575787	0.408066	0.055363
C5	0.0266965	0.0882876	-0.0861798	-0.0580521	0	0.0075639	-0.0583682	-0.0336631	-0.0102232	-0.0679695	-0.0293237	-0.0109837	0.0990383	-0.0570054	-0.0846451	-0.109364	0.340163	-0.0337784	0.028617	-0.108273	-0.0765196	0.0883512	0.0320139	0.0876576	-0.0867118	0.0444237	-0.0926769	-0.0718983	-0.0864973	-0.0229821	0.011122	-0.0842062	-0.115729	0.160277	-0.0446235	-0.0871971	-0.0945659	0.0206969
C6	-0.0182944	-0.0479186	0.0433367	0.526613	0.0075639	0	0.345347	0.0391992	0.130763	-0.0486474	0.231367	-0.039313	-0.112425	0.396961	-0.019017	0.24482	-0.0527903	0.159934	0.584598	0.249353	0.439445	0.00903851	-0.0101976	0.102752	0.229335	0.0577664	0.110964	0.112862	0.237051	-0.0570333	0.107436	0.277631	0.135373	0.00680734	0.159474	0.539392	0.315607	0.087839
C7	-0.0881317	-0.123758	0.0587777	0.615916	-0.0583682	0.345347	0	0.0525922	0.094836	0.0543249	0.131303	-0.0949874	-0.0975204	0.49977	-0.00617079	0.189186	-0.159459	0.0963906	0.331429	0.276786	0.431995	-0.0677285	-0.119434	0.0109639	0.172773	0.0314457	0.121427	0.332931	0.168389	-0.131203	0.180689	0.29956	0.140847	-0.120621	0.068095	0.361181	0.311334	0.0300104
C8	0.179386	-0.0383579	-0.191446	0.0225163	-0.0336631	0.0391992	0.0525922	0	0.165156	0.129098	0.05535	0.340611	0.0252043	0.0133147	0.257028	0.0650225	-0.0661394	-0.00540504	0.0764513	0.0532488	-0.0580575	0.000217649	0.295348	0.0792191	-0.223503	0.0319002	-0.195057	-0.0177971	0.156567	0.13126	0.324165	0.212003	-0.0516428	-0.0502866	-0.0177453	0.0413719	-0.0642263	0.0143498
C9	0.379446	-0.0567946	0.16298	0.112732	-0.0102232	0.130763	0.094836	0.165156	0	0.197717	0.402821	0.0255221	-0.123571	0.12328	0.316446	0.300807	-0.141034	0.197208	0.0822604	0.197082	0.174276	0.0989575	0.171109	0.167078	0.0987025	0.209362	0.178776	0.0459704	0.283737	0.0191302	0.232128	0.390408	0.337375	0.0681882	0.237089	0.215538	0.241719	0.118009
C10	0.204233	0.00996244	-0.0306636	0.0152315	-0.0679695	-0.0486474	0.0543249	0.129098	0.197717	0	0.0695065	0.109525	-0.0621039	0.0660376	0.0910446	0.0218554	-0.175746	-0.081852	-0.0672129	0.0831948	-0.00966401	-0.157746	0.0626087	-0.0928905	-0.0826944	-0.00338422	-0.0105086	0.208714	0.0397846	0.0251889	0.113329	0.148458	0.0421755	-0.0148584	0.0371174	-0.0026187	0.00445648	0.0492083
C11	0.127606	-0.0486293	0.309692	0.20049	-0.0293237	0.231367	0.131303	0.05535	0.402821	0.0695065	0	-0.0915694	-0.138827	0.229014	0.256239	0.345021	-0.155373	0.32258	0.167371	0.229314	0.297299	0.100656	0.0414541	0.142629	0.299688	0.192228	0.358045	0.0838892	0.374518	-0.0554254	0.0925815	0.324104	0.447047	0.0651645	0.372548	0.337034	0.430006	0.0369016
C12	0.159031	0.103729	-0.355217	-0.126305	-0.0109837	-0.039313	-0.0949874	0.340611	0.0255221	0.109525	-0.0915694	0	0.134393	-0.0865817	0.0632418	-0.119476	0.072723	-0.181523	-0.0335798	-0.120208	-0.241016	-0.0244246	0.442296	-0.0299144	-0.362708	-0.0460045	-0.349314	-0.133852	-0.0727269	0.286631	0.141378	-0.0103782	-0.24502	0.101116	-0.126894	-0.127306	-0.252019	-0.0528284
C13	-0.152727	0.0574955	-0.0609247	-0.132965	0.0990383	-0.112425	-0.0975204	0.0252043	-0.123571	-0.0621039	-0.138827	0.134393	0	-0.0746106	-0.0948463	-0.15055	0.261134	-0.0120325	-0.116884	-0.120069	-0.145392	0.17806	0.123974	-0.0783995	-0.0826926	0.140075	-0.0705988	-0.102514	-0.190053	0.274708	-0.127995	-0.202068	-0.17568	0.217245	0.00220678	-0.199791	-0.111525	-0.307797
C14	-0.104234	-0.0700067	0.118399	0.60641	-0.0570054	0.396961	0.49977	0.0133147	0.12328	0.0660376	0.229014	-0.0865817	-0.0746106	0	-0.00906604	0.254309	-0.154753	0.19072	0.33406	0.281063	0.480509	-0.0499154	-0.0859863	-0.00648639	0.280182	0.0539071	0.198895	0.313694	0.21098	-0.0842333	0.102826	0.269638	0.185893	-0.00388457	0.217832	0.398734	0.41602	-0.0221053
C15	0.186786	-0.0359521	0.131312	-0.0380108	-0.0846451	-0.019017	-0.00617079	0.257028	0.316446	0.0910446	0.256239	0.0632418	-0.0948463	-0.00906604	0	0.225006	-0.146549	0.16143	-0.0329065	0.0695138	0.0254258	0.111762	0.179498	0.112493	0.00442827	0.0865756	0.100121	-0.0393037	0.231627	0.0238452	0.29726	0.269481	0.267575	-0.00408521	0.12439	0.0860984	0.118867	0.029476
C16	0.0513171	-0.128807	0.250197	0.263168	-0.109364	0.24482	0.189186	0.0650225	0.300807	0.0218554	0.345021	-0.119476	-0.15055	0.254309	0.225006	0	-0.225918	0.324177	0.200274	0.352663	0.416279	0.0753163	-0.0234725	0.139311	0.288355	0.161852	0.266154	0.0800854	0.339392	-0.114945	0.136774	0.439668	0.438244	-0.0714832	0.292887	0.372009	0.406279	0.11664
C17	-0.0492122	0.134994	-0.14773	-0.155796	0.340163	-0.0527903	-0.159459	-0.0661394	-0.141034	-0.175746	-0.155373	0.072723	0.261134	-0.154753	-0.146549	-0.225918	0	-0.101528	-0.0349013	-0.222697	-0.193079	0.222895	0.0976449	0.0869732	-0.129641	0.00487308	-0.15744	-0.219629	-0.225473	0.176555	-0.0971709	-0.25031	-0.230389	0.233981	-0.101717	-0.184387	-0.178897	-0.10601
C18	-0.0221026	-0.0354616	0.356687	0.159096	-0.0337784	0.159934	0.0963906	-0.00540504	0.197208	-0.081852	0.32258	-0.181523	-0.0120325	0.19072	0.16143	0.324177	-0.101528	0	0.11233	0.207688	0.292387	0.136571	-0.0359633	0.116544	0.355965	0.194879	0.34818	0.0540745	0.271477	-0.0358489	-0.000674158	0.173352	0.337934	0.0784024	0.387078	0.251307	0.373582	-0.0067656
C19	-0.0320436	-0.0824908	-0.0152365	0.527754	0.028617	0.584598	0.331429	0.0764513	0.0822604	-0.0672129	0.167371	-0.0335798	-0.116884	0.33406	-0.0329065	0.200274	-0.0349013	0.11233	0	0.253621	0.363167	0.0220233	-0.0281584	0.143997	0.168749	0.086225	0.045486	0.091963	0.248577	-0.0669622	0.110793	0.260877	0.0790026	-0.0543074	0.0962284	0.507582	0.239306	0.108166
C20	-0.00753163	-0.113673	0.201639	0.372321	-0.108273	0.249353	0.276786	0.0532488	0.197082	0.0831948	0.229314	-0.120208	-0.120069	0.281063	0.0695138	0.352663	-0.222697	0.207688	0.253621	0	0.455813	-0.00629626	-0.123779	0.160848	0.26708	0.218533	0.235202	0.228086	0.33244	-0.159183	0.0539165	0.376839	0.268371	-0.15507	0.262259	0.373378	0.332899	0.079576
C21	-0.0774785	-0.124983	0.273463	0.608885	-0.0765196	0.439445	0.431995	-0.0580575	0.174276	-0.00966401	0.297299	-0.241016	-0.145392	0.480509	0.0254258	0.416279	-0.193079	0.292387	0.363167	0.455813	0	0.0200224	-0.164586	0.0966879	0.476825	0.153265	0.34998	0.223557	0.286925	-0.180389	0.0533939	0.343452	0.352278	-0.0742159	0.264694	0.586474	0.618932	0.0734828
C22	-0.00171432	-0.0341217	0.129742	-0.042752	0.0883512	0.00903851	-0.0677285	0.000217649	0.0989575	-0.157746	0.100656	-0.0244246	0.17806	-0.0499154	0.111762	0.0753163	0.222895	0.136571	0.0220233	-0.00629626	0.0200224	0	0.143818	0.234532	0.0918487	0.249619	0.119666	-0.198873	0.0239983	0.143168	-0.0181879	0.00994883	0.119627	0.166099	0.122702	0.0160263	0.108161	-0.142506
C23	0.237647	0.0959668	-0.162496	-0.129545	0.0320139	-0.0101976	-0.119434	0.295348	0.171109	0.0626087	0.0414541	0.442296	0.123974	-0.0859863	0.179498	-0.0234725	0.0976449	-0.0359633	-0.0281584	-0.123779	-0.164586	0.143818	0	0.0660876	-0.218539	0.0519447	-0.168829	-0.231593	-0.00889816	0.29325	0.17534	0.045623	-0.0742882	0.207145	-0.0156894	-0.0629114	-0.111837	-0.0391689
C24	0.117874	0.00645407	0.0662639	0.0758706	0.0876576	0.102752	0.0109639	0.0792191	0.167078	-0.0928905	0.142629	-0.0299144	-0.0783995	-0.00648639	0.112493	0.139311	0.0869732	0.116544	0.143997	0.160848	0.0966879	0.234532	0.0660876	0	0.0493325	0.186209	0.0534114	-0.0820809	0.240823	-0.0644524	0.0432593	0.155705	0.123029	-0.0607528	0.119694	0.126874	0.086136	0.0868503
C25	-0.144614	-0.0752114	0.478405	0.274283	-0.0867118	0.229335	0.172773	-0.223503	0.0987025	-0.0826944	0.299688	-0.362708	-0.0826926	0.280182	0.00442827	0.288355	-0.129641	0.355965	0.168749	0.26708	0.476825	0.0918487	-0.218539	0.0493325	0	0.151117	0.588406	0.138466	0.204636	-0.135347	-0.134815	0.133133	0.41375	0.0218391	0.346558	0.324808	0.56508	-0.0279208
C26	0.0459871	-0.0812169	0.22349	0.0794645	0.0444237	0.0577664	0.0314457	0.0319002	0.209362	-0.00338422	0.192228	-0.0460045	0.140075	0.0539071	0.0865756	0.161852	0.00487308	0.194879	0.086225	0.218533	0.153265	0.249619	0.0519447	0.186209	0.151117	0	0.225318	-0.024919	0.154138	0.0517378	-0.0255429	0.131251	0.18642	0.0690947	0.230315	0.118843	0.185024	-0.0373103
C27	-0.0646352	-0.0845866	0.865627	0.168405	-0.0926769	0.110964	0.121427	-0.195057	0.178776	-0.0105086	0.358045	-0.349314	-0.0705988	0.198895	0.100121	0.266154	-0.15744	0.34818	0.045486	0.235202	0.34998	0.119666	-0.168829	0.0534114	0.588406	0.225318	0	0.1346	0.192258	-0.113715	-0.086062	0.141147	0.558086	0.0274777	0.349254	0.22979	0.523811	-0.042022
C28	-0.0951271	-0.0731855	0.0847611	0.284769	-0.0718983	0.112862	0.332931	-0.0177971	0.0459704	0.208714	0.0838892	-0.133852	-0.102514	0.313694	-0.0393037	0.0800854	-0.219629	0.0540745	0.091963	0.228086	0.223557	-0.198873	-0.231593	-0.0820809	0.138466	-0.024919	0.1346	0	0.143234	-0.195307	0.0587572	0.173848	0.113039	-0.146096	0.111313	0.157396	0.201541	-0.0137376
C29	0.0915649	-0.126238	0.163411	0.275279	-0.0864973	0.237051	0.168389	0.156567	0.283737	0.0397846	0.374518	-0.0727269	-0.190053	0.21098	0.231627	0.339392	-0.225473	0.271477	0.248577	0.33244	0.286925	0.0239983	-0.00889816	0.240823	0.204636	0.154138	0.192258	0.143234	0	-0.129478	0.119385	0.423947	0.314015	-0.132211	0.320608	0.389943	0.314082	0.0729044
C30	0.086987	0.103408	-0.119835	-0.135345	-0.0229821	-0.0570333	-0.131203	0.13126	0.0191302	0.0251889	-0.0554254	0.286631	0.274708	-0.0842333	0.0238452	-0.114945	0.176555	-0.0358489	-0.0669622	-0.159183	-0.180389	0.143168	0.29325	-0.0644524	-0.135347	0.0517378	-0.113715	-0.195307	-0.129478	0	-0.0095254	-0.107271	-0.133046	0.246171	-0.00505207	-0.105514	-0.107578	-0.138107
C31	0.172593	-0.0666786	-0.099353	0.10442	0.011122	0.107436	0.180689	0.324165	0.232128	0.113329	0.0925815	0.141378	-0.127995	0.102826	0.29726	0.136774	-0.0971709	-0.000674158	0.110793	0.0539165	0.0533939	-0.0181879	0.17534	0.0432593	-0.134815	-0.0255429	-0.086062	0.0587572	0.119385	-0.0095254	0	0.318769	0.0671785	-0.0397501	-0.0550436	0.125045	0.0504326	0.109543
C32	0.14263	-0.133254	0.105578	0.328497	-0.0842062	0.277631	0.29956	0.212003	0.390408	0.148458	0.324104	-0.0103782	-0.202068	0.269638	0.269481	0.439668	-0.25031	0.173352	0.260877	0.376839	0.343452	0.00994883	0.045623	0.155705	0.133133	0.131251	0.141147	0.173848	0.423947	-0.107271	0.318769	0	0.312122	-0.116329	0.210984	0.414597	0.321412	0.136832
C33	0.0549991	-0.115042	0.535681	0.178895	-0.115729	0.135373	0.140847	-0.0516428	0.337375	0.0421755	0.447047	-0.24502	-0.17568	0.185893	0.267575	0.438244	-0.230389	0.337934	0.0790026	0.268371	0.352278	0.119627	-0.0742882	0.123029	0.41375	0.18642	0.558086	0.113039	0.314015	-0.133046	0.0671785	0.312122	0	-0.0320626	0.330138	0.296967	0.526672	0.051976
C34	0.0403168	0.163989	0.0129321	-0.109706	0.160277	0.00680734	-0.120621	-0.0502866	0.0681882	-0.0148584	0.0651645	0.101116	0.217245	-0.00388457	-0.00408521	-0.0714832	0.233981	0.0784024	-0.0543074	-0.15507	-0.0742159	0.166099	0.207145	-0.0607528	0.0218391	0.0690947	0.0274777	-0.146096	-0.132211	0.246171	-0.0397501	-0.116329	-0.0320626	0	0.0776485	-0.0666804	0.00181871	-0.148037
C35	0.00597584	0.00379805	0.316692	0.167374	-0.0446235	0.159474	0.068095	-0.0177453	0.237089	0.0371174	0.372548	-0.126894	0.00220678	0.217832	0.12439	0.292887	-0.101717	0.387078	0.0962284	0.262259	0.264694	0.122702	-0.0156894	0.119694	0.346558	0.230315	0.349254	0.111313	0.320608	-0.00505207	-0.0550436	0.210984	0.330138	0.0776485	0	0.238169	0.39002	-0.0625083
C36	0.010585	-0.106546	0.159287	0.575787	-0.0871971	0.539392	0.361181	0.0413719	0.215538	-0.0026187	0.337034	-0.127306	-0.199791	0.398734	0.0860984	0.372009	-0.184387	0.251307	0.507582	0.373378	0.586474	0.0160263	-0.0629114	0.126874	0.324808	0.118843	0.22979	0.157396	0.389943	-0.105514	0.125045	0.414597	0.296967	-0.0666804	0.238169	0	0.490541	0.129573
C37	-0.0541799	-0.111519	0.40111	0.408066	-0.0945659	0.315607	0.311334	-0.0642263	0.241719	0.00445648	0.430006	-0.252019	-0.111525	0.41602	0.118867	0.406279	-0.178897	0.373582	0.239306	0.332899	0.618932	0.108161	-0.111837	0.086136	0.56508	0.185024	0.523811	0.201541	0.314082	-0.107578	0.0504326	0.321412	0.526672	0.00181871	0.39002	0.490541	0	-0.0122676
C38	0.218979	-0.00556504	-0.0234095	0.055363	0.0206969	0.087839	0.0300104	0.0143498	0.118009	0.0492083	0.0369016	-0.0528284	-0.307797	-0.0221053	0.029476	0.11664	-0.10601	-0.0067656	0.108166	0.079576	0.0734828	-0.142506	-0.0391689	0.0868503	-0.0279208	-0.0373103	-0.042022	-0.0137376	0.0729044	-0.138107	0.109543	0.136832	0.051976	-0.148037	-0.0625083	0.129573	-0.0122676	0

## Sheet: AW(control)
	C1	C2	C3	C4	C5	C6	C7	C8	C9	C10	C11	C12	C13	C14	C15	C16	C17	C18	C19	C20	C21	C22	C23	C24	C25	C26	C27	C28	C29	C30	C31	C32	C33	C34	C35	C36	C37	C38
C1	0	0.231915	-0.10979	-0.0741341	0.0425853	0.257228	-0.0413708	-0.0397087	-0.00897335	-0.110101	0.0492596	-0.0549597	-0.144463	-0.0330735	0.00312675	0.0427839	0.154771	-0.0988161	-0.0933623	-0.0832361	-0.0586857	-0.213235	-0.0798724	0.00036318	-0.00835535	-0.00667747	-0.0134057	-0.204553	0.0431647	-0.0901142	-0.0766061	0.119452	0.0512729	-0.0770045	0.0529777	-0.107053	-0.0485238	0.13222
C2	0.231915	0	-0.0632239	-0.0150851	0.090732	-0.00771254	-0.160752	-0.164529	-0.107556	-0.0113508	-0.0995666	0.0113775	-0.0901503	-0.126304	-0.0951236	-0.123007	0.148725	0.00287193	-0.0192642	-0.14891	-0.137353	-0.161768	0.1518	0.0180565	-0.0796146	0.0441365	-0.101199	-0.0664888	-0.0853956	-0.024976	-0.0382556	-0.0219087	-0.107951	-0.14233	0.0188243	-0.104093	-0.10843	0.111832
C3	-0.10979	-0.0632239	0	0.251891	-0.1145	-0.0160721	0.190993	0.159167	0.0787183	0.263599	0.115137	0.0998257	0.0565865	0.305737	0.26016	0.0707257	-0.0222042	0.14138	0.178247	0.272876	0.337943	0.27253	0.0315613	0.111174	0.273247	0.0948583	0.178763	0.116684	0.152933	0.226526	0.215363	0.1724	0.13165	0.136824	-0.103928	0.133263	0.324893	-0.171783
C4	-0.0741341	-0.0150851	0.251891	0	0.0759326	-0.150454	0.0976353	0.094806	0.0365269	0.379947	-0.0303933	0.0563523	0.0511384	0.362658	0.29018	-0.0358254	0.144384	-0.0210713	0.501162	0.243209	0.29233	0.352681	0.0347623	0.0548541	0.378945	0.268341	0.0606655	0.184828	-0.00292391	0.12902	0.505946	0.173284	0.0486676	0.0699643	-0.249177	0.0584258	0.373696	-0.19809
C5	0.0425853	0.090732	-0.1145	0.0759326	0	-0.143722	-0.15607	-0.160474	-0.0636554	-0.0220794	-0.162002	-0.0377818	0.0737962	-0.0718878	-0.101301	-0.182693	0.408384	-0.0631999	0.0600134	-0.0960373	-0.129658	-0.0207076	0.0766306	-0.014607	-0.0891858	0.0682448	-0.177707	0.0540659	-0.13822	0.0302542	0.0447106	-0.146576	-0.129562	-0.0970168	-0.0601831	-0.04549	-0.104475	0.0611824
C6	0.257228	-0.00771254	-0.0160721	-0.150454	-0.143722	0	0.157372	0.169381	0.141849	-0.116895	0.298442	0.0897206	-0.00369771	0.0530608	0.100202	0.317956	-0.0564421	0.00795934	-0.142388	0.096445	0.0628995	-0.107841	-0.13953	0.0876331	0.0342499	-0.20255	0.186727	-0.111467	0.263606	-0.00688486	-0.138393	0.173759	0.259735	0.0947308	0.213447	0.0767789	0.0342771	0.0113165
C7	-0.0413708	-0.160752	0.190993	0.0976353	-0.15607	0.157372	0	0.446538	0.321432	0.0099023	0.553627	0.107938	-0.0242377	0.328664	0.473502	0.487232	-0.0892672	-0.0548319	-0.0239944	0.346616	0.376131	0.151112	-0.186519	0.195195	0.326965	-0.0956784	0.38659	0.0460343	0.453167	0.180845	0.0374637	0.272455	0.682588	0.180654	0.00731113	0.182279	0.345437	-0.270568
C8	-0.0397087	-0.164529	0.159167	0.094806	-0.160474	0.169381	0.446538	0	0.192043	0.0813725	0.426784	0.157944	0.022679	0.322928	0.432534	0.393607	-0.0970955	0.0213027	0.023732	0.348299	0.389921	0.104298	-0.108287	0.156627	0.35023	-0.0875452	0.400737	0.0620985	0.360261	0.0857781	0.0442043	0.320163	0.432382	0.148332	0.0458848	0.139247	0.315468	-0.187829
C9	-0.00897335	-0.107556	0.0787183	0.0365269	-0.0636554	0.141849	0.321432	0.192043	0	-0.0567142	0.328693	0.200597	0.125974	0.268105	0.233413	0.352527	-0.0674944	0.021341	-0.0228601	0.301138	0.145064	0.171203	-0.128325	0.275029	0.121418	-0.221902	0.183374	0.00966758	0.364286	0.218082	0.048967	0.0408028	0.294014	0.393477	0.0695499	0.389386	0.184204	-0.317927
C10	-0.110101	-0.0113508	0.263599	0.379947	-0.0220794	-0.116895	0.0099023	0.0813725	-0.0567142	0	-0.0739751	0.104283	0.0890745	0.225043	0.170269	-0.0753446	0.0730271	0.164101	0.401413	0.198675	0.226159	0.254591	0.161317	0.0578098	0.251591	0.211622	0.0747508	0.17609	-0.0249056	0.0911733	0.331973	0.129574	-0.0381609	0.0697026	-0.147614	0.0466611	0.246975	-0.11221
C11	0.0492596	-0.0995666	0.115137	-0.0303933	-0.162002	0.298442	0.553627	0.426784	0.328693	-0.0739751	0	0.163761	0.000666805	0.255933	0.352146	0.794923	-0.0836575	0.00451212	-0.124418	0.303437	0.268566	0.0370307	-0.190702	0.248626	0.237602	-0.212732	0.459252	-0.0373642	0.592125	0.112918	-0.0649637	0.287289	0.662287	0.17471	0.159664	0.173922	0.214593	-0.127829
C12	-0.0549597	0.0113775	0.0998257	0.0563523	-0.0377818	0.0897206	0.107938	0.157944	0.200597	0.104283	0.163761	0	0.293627	0.142864	0.0747483	0.174537	-0.0802985	0.274526	0.0380761	0.298	0.0421046	0.14128	0.135695	0.25029	0.0489404	-0.285436	0.227361	0.0281814	0.179895	0.151013	-0.032743	0.0281611	0.112542	0.343292	0.252579	0.344996	0.0754615	-0.13017
C13	-0.144463	-0.0901503	0.0565865	0.0511384	0.0737962	-0.00369771	-0.0242377	0.022679	0.125974	0.0890745	0.000666805	0.293627	0	0.0882711	-0.0340949	0.0364585	-0.0821609	0.278186	0.122857	0.198875	-0.0124201	0.193994	0.172863	0.111937	-0.060518	-0.223679	0.0317455	0.18348	0.0621516	0.183638	0.0522241	-0.154984	-0.00596673	0.349518	0.158794	0.417187	0.0264891	-0.052652
C14	-0.0330735	-0.126304	0.305737	0.362658	-0.0718878	0.0530608	0.328664	0.322928	0.268105	0.225043	0.255933	0.142864	0.0882711	0	0.590681	0.244069	0.0206047	0.0354515	0.244224	0.482538	0.510734	0.334893	-0.0628904	0.22322	0.535914	0.0590542	0.271325	0.117501	0.313156	0.16771	0.303467	0.301073	0.300202	0.223716	-0.110056	0.206808	0.568305	-0.26892
C15	0.00312675	-0.0951236	0.26016	0.29018	-0.101301	0.100202	0.473502	0.432534	0.233413	0.170269	0.352146	0.0747483	-0.0340949	0.590681	0	0.324131	0.027142	-0.0448842	0.150799	0.368928	0.594393	0.217329	-0.131166	0.18242	0.685453	0.080746	0.342989	0.0753155	0.374625	0.110039	0.252329	0.438909	0.424124	0.117606	-0.107367	0.100814	0.535067	-0.28113
C16	0.0427839	-0.123007	0.0707257	-0.0358254	-0.182693	0.317956	0.487232	0.393607	0.352527	-0.0753446	0.794923	0.174537	0.0364585	0.244069	0.324131	0	-0.123077	-0.00538331	-0.0993224	0.309831	0.23463	0.0527641	-0.189565	0.212666	0.21379	-0.237455	0.463307	-0.037725	0.528662	0.0635822	-0.045467	0.261032	0.598249	0.211972	0.18262	0.191567	0.192511	-0.13904
C17	0.154771	0.148725	-0.0222042	0.144384	0.408384	-0.0564421	-0.0892672	-0.0970955	-0.0674944	0.0730271	-0.0836575	-0.0802985	-0.0821609	0.0206047	0.027142	-0.123077	0	-0.103666	0.101158	-0.0564204	-0.00859692	-0.032382	-0.010398	0.0535779	0.0657039	0.202931	-0.0836724	-0.00654613	-0.0797812	-0.00535163	0.108241	0.0511737	-0.0613336	-0.156442	-0.122093	-0.1483	0.000316372	0.0635654
C18	-0.0988161	0.00287193	0.14138	-0.0210713	-0.0631999	0.00795934	-0.0548319	0.0213027	0.021341	0.164101	0.00451212	0.274526	0.278186	0.0354515	-0.0448842	-0.00538331	-0.103666	0	0.056437	0.123786	0.0256483	0.0867233	0.19461	0.119097	-0.0492252	-0.152963	0.0577943	0.0597093	0.0652528	0.154295	-0.0154535	-0.0791003	-0.0755472	0.226557	0.160242	0.229904	0.0193395	-0.00249413
C19	-0.0933623	-0.0192642	0.178247	0.501162	0.0600134	-0.142388	-0.0239944	0.023732	-0.0228601	0.401413	-0.124418	0.0380761	0.122857	0.244224	0.150799	-0.0993224	0.101158	0.056437	0	0.155421	0.20065	0.269591	0.0928959	0.0069488	0.215393	0.246065	-0.0151346	0.231115	-0.0840659	0.0783481	0.460144	0.0837994	-0.0554671	0.0755413	-0.227437	0.0608825	0.276808	-0.125362
C20	-0.0832361	-0.14891	0.272876	0.243209	-0.0960373	0.096445	0.346616	0.348299	0.301138	0.198675	0.303437	0.298	0.198875	0.482538	0.368928	0.309831	-0.0564204	0.123786	0.155421	0	0.355534	0.345745	-0.032396	0.22111	0.339849	-0.100288	0.374152	0.101685	0.284918	0.262726	0.163072	0.209504	0.304997	0.384234	0.0654619	0.354629	0.373253	-0.250915
C21	-0.0586857	-0.137353	0.337943	0.29233	-0.129658	0.0628995	0.376131	0.389921	0.145064	0.226159	0.268566	0.0421046	-0.0124201	0.510734	0.594393	0.23463	-0.00859692	0.0256483	0.20065	0.355534	0	0.238111	-0.104145	0.110659	0.539321	0.114247	0.302353	0.17065	0.264716	0.163108	0.260444	0.382359	0.321661	0.108325	-0.133356	0.0961139	0.631035	-0.205845
C22	-0.213235	-0.161768	0.27253	0.352681	-0.0207076	-0.107841	0.151112	0.104298	0.171203	0.254591	0.0370307	0.14128	0.193994	0.334893	0.217329	0.0527641	-0.032382	0.0867233	0.269591	0.345745	0.238111	0	0.0451756	0.109842	0.236726	0.0503536	0.0953741	0.191967	0.0940518	0.224356	0.271033	0.0392457	0.0975108	0.270533	-0.11478	0.256308	0.288473	-0.312016
C23	-0.0798724	0.1518	0.0315613	0.0347623	0.0766306	-0.13953	-0.186519	-0.108287	-0.128325	0.161317	-0.190702	0.135695	0.172863	-0.0628904	-0.131166	-0.189565	-0.010398	0.19461	0.0928959	-0.032396	-0.104145	0.0451756	0	0.00709147	-0.107311	-0.000444435	-0.0560102	0.123861	-0.0946774	0.0368458	0.000435967	-0.135783	-0.183734	0.0191627	0.0334457	0.0376517	-0.0759185	0.0446938
C24	0.00036318	0.0180565	0.111174	0.0548541	-0.014607	0.0876331	0.195195	0.156627	0.275029	0.0578098	0.248626	0.25029	0.111937	0.22322	0.18242	0.212666	0.0535779	0.119097	0.0069488	0.22111	0.110659	0.109842	0.00709147	0	0.145493	-0.163312	0.165621	0.0533138	0.287334	0.153288	-0.0170748	0.0902551	0.215755	0.215128	0.0916059	0.235794	0.142114	-0.125736
C25	-0.00835535	-0.0796146	0.273247	0.378945	-0.0891858	0.0342499	0.326965	0.35023	0.121418	0.251591	0.237602	0.0489404	-0.060518	0.535914	0.685453	0.21379	0.0657039	-0.0492252	0.215393	0.339849	0.539321	0.236726	-0.107311	0.145493	0	0.157375	0.285366	0.0648628	0.231882	0.0618664	0.293946	0.48294	0.29923	0.0568259	-0.148621	0.0365063	0.493604	-0.208673
C26	-0.00667747	0.0441365	0.0948583	0.268341	0.0682448	-0.20255	-0.0956784	-0.0875452	-0.221902	0.211622	-0.212732	-0.285436	-0.223679	0.0590542	0.080746	-0.237455	0.202931	-0.152963	0.246065	-0.100288	0.114247	0.0503536	-0.000444435	-0.163312	0.157375	0	-0.1144	0.0510974	-0.187691	-0.0797356	0.312195	0.11881	-0.143112	-0.259099	-0.440699	-0.313399	0.12117	0.0146721
C27	-0.0134057	-0.101199	0.178763	0.0606655	-0.177707	0.186727	0.38659	0.400737	0.183374	0.0747508	0.459252	0.227361	0.0317455	0.271325	0.342989	0.463307	-0.0836724	0.0577943	-0.0151346	0.374152	0.302353	0.0953741	-0.0560102	0.165621	0.285366	-0.1144	0	-0.0283674	0.362423	0.0744687	0.0157928	0.362276	0.379828	0.160571	0.147605	0.111135	0.221451	-0.126495
C28	-0.204553	-0.0664888	0.116684	0.184828	0.0540659	-0.111467	0.0460343	0.0620985	0.00966758	0.17609	-0.0373642	0.0281814	0.18348	0.117501	0.0753155	-0.037725	-0.00654613	0.0597093	0.231115	0.101685	0.17065	0.191967	0.123861	0.0533138	0.0648628	0.0510974	-0.0283674	0	-0.0098187	0.15521	0.158403	-0.0323451	0.0356461	0.0837661	-0.098901	0.144472	0.188274	-0.0596686
C29	0.0431647	-0.0853956	0.152933	-0.00292391	-0.13822	0.263606	0.453167	0.360261	0.364286	-0.0249056	0.592125	0.179895	0.0621516	0.313156	0.374625	0.528662	-0.0797812	0.0652528	-0.0840659	0.284918	0.264716	0.0940518	-0.0946774	0.287334	0.231882	-0.187691	0.362423	-0.0098187	0	0.138272	-0.0128298	0.216804	0.530481	0.222176	0.103719	0.222314	0.219844	-0.181468
C30	-0.0901142	-0.024976	0.226526	0.12902	0.0302542	-0.00688486	0.180845	0.0857781	0.218082	0.0911733	0.112918	0.151013	0.183638	0.16771	0.110039	0.0635822	-0.00535163	0.154295	0.0783481	0.262726	0.163108	0.224356	0.0368458	0.153288	0.0618664	-0.0797356	0.0744687	0.15521	0.138272	0	0.0658326	-0.056649	0.124494	0.288333	-0.0110532	0.332823	0.206936	-0.164242
C31	-0.0766061	-0.0382556	0.215363	0.505946	0.0447106	-0.138393	0.0374637	0.0442043	0.048967	0.331973	-0.0649637	-0.032743	0.0522241	0.303467	0.252329	-0.045467	0.108241	-0.0154535	0.460144	0.163072	0.260444	0.271033	0.000435967	-0.0170748	0.293946	0.312195	0.0157928	0.158403	-0.0128298	0.0658326	0	0.12844	-0.0136547	0.0445963	-0.28361	0.0341056	0.304242	-0.179092
C32	0.119452	-0.0219087	0.1724	0.173284	-0.146576	0.173759	0.272455	0.320163	0.0408028	0.129574	0.287289	0.0281611	-0.154984	0.301073	0.438909	0.261032	0.0511737	-0.0791003	0.0837994	0.209504	0.382359	0.0392457	-0.135783	0.0902551	0.48294	0.11881	0.362276	-0.0323451	0.216804	-0.056649	0.12844	0	0.298051	-0.0415993	-0.0333935	-0.0799886	0.307439	-0.0611479
C33	0.0512729	-0.107951	0.13165	0.0486676	-0.129562	0.259735	0.682588	0.432382	0.294014	-0.0381609	0.662287	0.112542	-0.00596673	0.300202	0.424124	0.598249	-0.0613336	-0.0755472	-0.0554671	0.304997	0.321661	0.0975108	-0.183734	0.215755	0.29923	-0.143112	0.379828	0.0356461	0.530481	0.124494	-0.0136547	0.298051	0	0.156343	0.064939	0.169017	0.280746	-0.182543
C34	-0.0770045	-0.14233	0.136824	0.0699643	-0.0970168	0.0947308	0.180654	0.148332	0.393477	0.0697026	0.17471	0.343292	0.349518	0.223716	0.117606	0.211972	-0.156442	0.226557	0.0755413	0.384234	0.108325	0.270533	0.0191627	0.215128	0.0568259	-0.259099	0.160571	0.0837661	0.222176	0.288333	0.0445963	-0.0415993	0.156343	0	0.1364	0.632724	0.164171	-0.228683
C35	0.0529777	0.0188243	-0.103928	-0.249177	-0.0601831	0.213447	0.00731113	0.0458848	0.0695499	-0.147614	0.159664	0.252579	0.158794	-0.110056	-0.107367	0.18262	-0.122093	0.160242	-0.227437	0.0654619	-0.133356	-0.11478	0.0334457	0.0916059	-0.148621	-0.440699	0.147605	-0.098901	0.103719	-0.0110532	-0.28361	-0.0333935	0.064939	0.1364	0	0.129173	-0.169677	0.109739
C36	-0.107053	-0.104093	0.133263	0.0584258	-0.04549	0.0767789	0.182279	0.139247	0.389386	0.0466611	0.173922	0.344996	0.417187	0.206808	0.100814	0.191567	-0.1483	0.229904	0.0608825	0.354629	0.0961139	0.256308	0.0376517	0.235794	0.0365063	-0.313399	0.111135	0.144472	0.222314	0.332823	0.0341056	-0.0799886	0.169017	0.632724	0.129173	0	0.155143	-0.240842
C37	-0.0485238	-0.10843	0.324893	0.373696	-0.104475	0.0342771	0.345437	0.315468	0.184204	0.246975	0.214593	0.0754615	0.0264891	0.568305	0.535067	0.192511	0.000316372	0.0193395	0.276808	0.373253	0.631035	0.288473	-0.0759185	0.142114	0.493604	0.12117	0.221451	0.188274	0.219844	0.206936	0.304242	0.307439	0.280746	0.164171	-0.169677	0.155143	0	-0.243131
C38	0.13222	0.111832	-0.171783	-0.19809	0.0611824	0.0113165	-0.270568	-0.187829	-0.317927	-0.11221	-0.127829	-0.13017	-0.052652	-0.26892	-0.28113	-0.13904	0.0635654	-0.00249413	-0.125362	-0.250915	-0.205845	-0.312016	0.0446938	-0.125736	-0.208673	0.0146721	-0.126495	-0.0596686	-0.181468	-0.164242	-0.179092	-0.0611479	-0.182543	-0.228683	0.109739	-0.240842	-0.243131	0

## Sheet: REMS
	C1	C2	C3	C4	C5	C6	C7	C8	C9	C10	C11	C12	C13	C14	C15	C16	C17	C18	C19	C20	C21	C22	C23	C24	C25	C26	C27	C28	C29	C30	C31	C32	C33	C34	C35	C36	C37	C38	C39	C40	C41	C42	C43	C44
C1	1	-0.337988	-0.0474534	0.292134	-0.0611863	0.0963688	-0.252403	0.22129	0.167599	-0.303805	-0.0407525	-0.263487	-0.158972	0.0433237	-0.0432257	0.00665238	-0.0643941	0.365469	0.050996	0.188476	-0.0444845	0.464689	-0.104238	-0.137446	0.0869336	-0.00494369	0.117692	0.41504	-0.264035	-0.137282	0.137932	-0.31873	0.0814406	0.286901	-0.292262	0.492351	-0.184813	0.00409762	0.211727	-0.276247	-0.0294489	0.277162	-0.0324159	-0.165152
C2	-0.337988	1	0.31773	0.207567	-0.403364	-0.139448	0.0700002	-0.265409	-0.257815	0.266959	0.359317	0.384577	-0.242178	-0.0607545	0.426458	-0.20122	0.642218	-0.0679533	-0.277613	0.0790796	0.204084	-0.094302	0.348432	0.00203027	-0.54052	-0.344001	-0.108979	-0.499886	0.65974	0.472094	-0.0710884	-0.00744782	0.291526	0.412821	0.218053	0.192033	0.141985	-0.373867	0.0603517	0.0392929	0.203664	-0.244158	-0.18992	0.506682
C3	-0.0474534	0.31773	1	-0.0241728	-0.07677	0.15708	0.0269178	0.07261	-0.285744	0.106931	0.210919	0.315658	0.190063	0.0539839	0.241999	0.0419841	0.388415	0.061188	0.0278043	0.0949149	0.0672185	-0.0492233	0.237263	0.248995	-0.270865	-0.018901	-0.0368818	-0.0370225	0.228677	0.211682	0.258635	0.0851377	0.169741	0.271261	0.0446133	0.196358	0.212139	-0.111647	0.135093	0.314166	0.20164	-0.00420709	-0.0763321	0.161854
C4	0.292134	0.207567	-0.0241728	1	-0.248844	0.219355	0.0617744	-0.0832082	0.280515	-0.0866236	0.392706	-0.0906506	-0.25103	0.053398	0.0280172	0.186935	0.32765	0.271923	0.0546627	0.428603	0.129088	0.527674	0.100747	-0.157875	-0.122005	-0.0338	0.024287	0.0218147	0.154726	0.234848	0.304217	0.169711	0.37382	0.36742	-0.207637	0.419652	0.0355487	-0.190958	0.308122	-0.217587	0.281069	0.176152	-0.0199071	0.302982
C5	-0.0611863	-0.403364	-0.07677	-0.248844	1	0.196144	0.0487514	0.26461	-0.0363068	0.00961516	-0.16192	-0.336784	0.191177	0.0106668	-0.465201	0.0820912	-0.410514	0.0307837	0.195975	-0.073246	0.0481119	-0.301827	-0.147084	0.271784	0.207886	0.183682	0.0672443	0.244857	-0.30735	-0.238265	-0.0455475	-0.0719384	-0.19881	-0.274546	0.101858	-0.304105	-0.229207	0.24649	0.00518693	0.01398	-0.251958	0.026083	0.0847995	-0.319209
C6	0.0963688	-0.139448	0.15708	0.219355	0.196144	1	0.165661	0.287383	0.357649	-0.033323	0.137513	-0.0629818	0.205825	-0.131189	-0.0887618	0.208934	-0.00972354	0.220268	0.158128	0.404934	-0.0130059	0.144546	0.34966	0.0891997	0.207065	0.197438	0.0252582	0.295133	-0.0585374	-0.0520674	0.396834	0.230274	0.371438	0.252952	-0.196112	0.207471	0.145291	-0.152111	0.500722	0.104943	0.282994	0.293235	0.0231358	-0.0431628
C7	-0.252403	0.0700002	0.0269178	0.0617744	0.0487514	0.165661	1	0.109186	-0.103774	0.270442	0.375924	-0.0650543	0.0854124	0.0635876	-0.0434338	0.311981	0.0348095	0.13458	0.180353	0.200614	0.282148	-0.218796	0.231198	0.0143874	-0.00339487	-0.225015	-0.0659784	-0.0933444	0.313999	0.10804	-0.222946	0.172044	0.142443	0.100084	0.186599	-0.0203523	0.0152947	-0.159821	0.290309	0.0888533	0.13126	0.259777	0.239396	0.118044
C8	0.22129	-0.265409	0.07261	-0.0832082	0.26461	0.287383	0.109186	1	0.0978941	-0.0162778	0.0664091	-0.223484	0.039606	0.156216	-0.101747	0.212959	-0.145103	0.14539	0.10828	0.0715643	0.110161	0.0132546	0.0368991	0.0697917	0.231111	0.0723073	-0.0405091	0.28496	-0.124202	-0.351646	0.0528851	-0.0689196	0.0999397	0.0971972	0.0132422	-0.0460786	-0.0713815	-0.0963367	0.264978	-0.128615	0.215315	0.271475	0.176926	-0.291829
C9	0.167599	-0.257815	-0.285744	0.280515	-0.0363068	0.357649	-0.103774	0.0978941	1	-0.251686	-0.160682	-0.170984	-0.0528798	-0.149143	-0.0897732	0.16426	-0.0453996	-0.0597016	-0.126059	0.335814	-0.333257	0.340547	0.0414097	-0.110169	0.299041	0.299048	-0.0611889	0.257006	-0.251627	-0.228275	0.305574	0.139134	0.300469	-0.0367139	-0.504016	0.0824376	0.300266	-0.084504	0.413175	-0.176388	0.303388	0.193898	0.0727419	-0.0846041
C10	-0.303805	0.266959	0.106931	-0.0866236	0.00961516	-0.033323	0.270442	-0.0162778	-0.251686	1	0.174266	-0.0887533	0.136466	0.0351818	0.0363592	0.0748284	0.0619916	-0.022792	0.171301	-0.0262397	0.240852	-0.243173	0.284708	0.0932119	-0.186846	-0.166391	-0.0141786	-0.288499	0.309132	0.147539	-0.244251	-0.0583343	0.0771073	0.0577558	0.285179	-0.108168	0.0343636	-0.160354	0.0857938	0.206756	0.0303148	-0.0398718	0.0957439	0.141247
C11	-0.0407525	0.359317	0.210919	0.392706	-0.16192	0.137513	0.375924	0.0664091	-0.160682	0.174266	1	-0.095986	-0.115371	0.0765388	0.0299799	0.264552	0.377052	0.336713	0.172909	0.282012	0.392161	0.0127944	0.260315	-0.0388111	-0.164664	-0.330495	-0.0416006	-0.148197	0.410316	0.201104	-0.132714	0.0672373	0.321974	0.445876	0.137851	0.309879	-0.0669055	-0.346517	0.325679	-0.0611325	0.189926	0.218719	0.191202	0.348665
C12	-0.263487	0.384577	0.315658	-0.0906506	-0.336784	-0.0629818	-0.0650543	-0.223484	-0.170984	-0.0887533	-0.095986	1	0.220886	0.0987975	0.437772	-0.22434	0.414037	-0.170523	-0.261447	-0.0279257	-0.164309	0.0412848	-0.000656505	0.243638	-0.330594	-0.0751517	-0.0292965	-0.173804	0.307725	0.223332	0.280704	0.346593	-0.0739132	0.0616451	-0.0727708	0.0606937	0.550394	-0.0279097	-0.223119	0.409164	0.321301	-0.157875	-0.261293	0.0908923
C13	-0.158972	-0.242178	0.190063	-0.25103	0.191177	0.205825	0.0854124	0.039606	-0.0528798	0.136466	-0.115371	0.220886	1	-0.0165984	-0.0416804	0.173785	-0.0238615	-0.0756118	0.155599	0.10764	-0.0462405	-0.174958	0.0254538	0.563018	-0.0437725	0.125554	-0.010847	0.0298944	-0.0814986	-0.0501056	0.139926	0.111382	-0.0810993	-0.0854737	-0.00377765	-0.0430144	0.256882	0.116784	-0.00413795	0.73501	0.149372	0.0431231	0.0555334	-0.194703
C14	0.0433237	-0.0607545	0.0539839	0.053398	0.0106668	-0.131189	0.0635876	0.156216	-0.149143	0.0351818	0.0765388	0.0987975	-0.0165984	1	-0.0477338	0.00126461	-0.031419	-0.0193152	0.105136	-0.175522	0.291355	0.229233	-0.0917962	-0.0432749	0.0245517	-0.055543	0.229115	0.160043	0.0128597	-0.019517	0.0684875	0.0956615	0.0303062	0.0620016	0.134296	-0.028988	0.114301	0.0181085	-0.0214275	-0.0554216	0.26483	0.117903	0.321903	0.0790569
C15	-0.0432257	0.426458	0.241999	0.0280172	-0.465201	-0.0887618	-0.0434338	-0.101747	-0.0897732	0.0363592	0.0299799	0.437772	-0.0416804	-0.0477338	1	-0.0517151	0.567373	-0.0169996	-0.193766	0.0955823	0.0712019	0.239548	0.137798	0.159219	-0.144822	-0.219904	0.0218187	-0.375875	0.411738	0.257924	0.00528259	0.154208	0.19497	0.24727	-0.030434	0.273587	0.289256	-0.233913	0.0595533	0.0140083	0.369551	-0.0785707	-0.0912904	0.266565
C16	0.00665238	-0.20122	0.0419841	0.186935	0.0820912	0.208934	0.311981	0.212959	0.16426	0.0748284	0.264552	-0.22434	0.173785	0.00126461	-0.0517151	1	0.114935	0.182887	0.206418	0.326016	0.161987	-0.0307559	-0.0851788	0.111389	0.164883	0.0403114	-0.01345	-0.00805876	-0.0928877	-0.0372787	0.0867067	0.106762	0.205891	0.0168223	-0.146311	0.107893	-0.0420386	-0.0390523	0.335674	0.0573896	0.128411	0.316444	0.291319	-0.0117694
C17	-0.0643941	0.642218	0.388415	0.32765	-0.410514	-0.00972354	0.0348095	-0.145103	-0.0453996	0.0619916	0.377052	0.414037	-0.0238615	-0.031419	0.567373	0.114935	1	0.0250822	-0.20565	0.319442	0.216972	0.141037	0.158996	0.277976	-0.39169	-0.158712	0.0406483	-0.368025	0.448287	0.415034	0.137706	0.104701	0.318417	0.417354	0.00471026	0.332555	0.29843	-0.403872	0.168001	0.133145	0.418778	-0.051878	-0.132069	0.408268
C18	0.365469	-0.0679533	0.061188	0.271923	0.0307837	0.220268	0.13458	0.14539	-0.0597016	-0.022792	0.336713	-0.170523	-0.0756118	-0.0193152	-0.0169996	0.182887	0.0250822	1	0.222062	0.292286	0.174007	0.167081	0.0889117	0.00846363	0.116886	-0.0992624	0.0489715	0.200206	-0.0082745	0.00619802	0.0845804	0.129292	0.237111	0.312319	-0.0694808	0.349633	-0.214535	0.0376557	0.326249	-0.184933	-0.0367552	0.321787	0.00254142	0.0547099
C19	0.050996	-0.277613	0.0278043	0.0546627	0.195975	0.158128	0.180353	0.10828	-0.126059	0.171301	0.172909	-0.261447	0.155599	0.105136	-0.193766	0.206418	-0.20565	0.222062	1	0.0584386	0.0671359	-0.145119	-0.019574	-0.0451198	0.144714	0.085808	0.0889855	0.0158085	-0.0729354	-0.088725	0.0628794	-0.0561622	-0.0557594	0.1614	0.00779337	-0.030033	-0.118739	0.164752	0.103411	0.12722	-0.203325	0.24576	0.317415	-0.0663072
C20	0.188476	0.0790796	0.0949149	0.428603	-0.073246	0.404934	0.200614	0.0715643	0.335814	-0.0262397	0.282012	-0.0279257	0.10764	-0.175522	0.0955823	0.326016	0.319442	0.292286	0.0584386	1	-0.0193686	0.124192	0.189704	0.132086	-0.0116234	-0.0224017	-0.206612	0.0592751	0.0709129	0.0580176	0.328241	0.127232	0.348145	0.382059	-0.339046	0.410592	0.077866	-0.177011	0.385819	0.0797866	0.269967	0.213619	0.00364321	0.0803088
C21	-0.0444845	0.204084	0.0672185	0.129088	0.0481119	-0.0130059	0.282148	0.110161	-0.333257	0.240852	0.392161	-0.164309	-0.0462405	0.291355	0.0712019	0.161987	0.216972	0.174007	0.0671359	-0.0193686	1	0.0916924	0.122032	0.0431155	0.0206368	-0.106243	0.347725	-0.119515	0.290341	0.311823	-0.183282	0.0571883	0.226406	0.189064	0.514069	0.0298176	-0.0518666	-0.195539	0.157365	-0.0753773	0.268162	0.15071	0.111996	0.226066
C22	0.464689	-0.094302	-0.0492233	0.527674	-0.301827	0.144546	-0.218796	0.0132546	0.340547	-0.243173	0.0127944	0.0412848	-0.174958	0.229233	0.239548	-0.0307559	0.141037	0.167081	-0.145119	0.124192	0.0916924	1	0.066933	-0.184769	0.159166	0.0887143	0.244084	0.286116	-0.0393369	0.0627245	0.323289	0.201382	0.304372	0.199828	-0.256167	0.480944	0.185215	-0.0938344	0.189789	-0.25748	0.507918	0.182636	-0.0601309	0.114234
C23	-0.104238	0.348432	0.237263	0.100747	-0.147084	0.34966	0.231198	0.0368991	0.0414097	0.284708	0.260315	-0.000656505	0.0254538	-0.0917962	0.137798	-0.0851788	0.158996	0.0889117	-0.019574	0.189704	0.122032	0.066933	1	-0.0172009	-0.165137	-0.244153	-0.0408694	-0.0666536	0.348659	0.0886129	-0.0565781	0.18602	0.507023	0.456355	0.162886	0.251115	0.12287	-0.407553	0.326623	0.0323192	0.313942	0.0966856	0.0112597	0.289191
C24	-0.137446	0.00203027	0.248995	-0.157875	0.271784	0.0891997	0.0143874	0.0697917	-0.110169	0.0932119	-0.0388111	0.243638	0.563018	-0.0432749	0.159219	0.111389	0.277976	0.00846363	-0.0451198	0.132086	0.0431155	-0.184769	-0.0172009	1	-0.224046	0.0330923	0.0302481	-0.12443	0.0669215	-0.0283367	0.0491861	0.155187	-0.0703457	-0.0141315	0.0954191	-0.0585642	0.219476	-0.0154476	-0.000843736	0.457494	0.183053	-0.0689295	-0.0987385	-0.0652363
C25	0.0869336	-0.54052	-0.270865	-0.122005	0.207886	0.207065	-0.00339487	0.231111	0.299041	-0.186846	-0.164664	-0.330594	-0.0437725	0.0245517	-0.144822	0.164883	-0.39169	0.116886	0.144714	-0.0116234	0.0206368	0.159166	-0.165137	-0.224046	1	0.350547	0.191066	0.3575	-0.41618	-0.253805	0.149763	0.0824714	-0.0516982	-0.222111	-0.166908	-0.222504	-0.0316209	0.253539	0.144184	-0.268247	0.000563104	0.21173	0.121071	-0.358229
C26	-0.00494369	-0.344001	-0.018901	-0.0338	0.183682	0.197438	-0.225015	0.0723073	0.299048	-0.166391	-0.330495	-0.0751517	0.125554	-0.055543	-0.219904	0.0403114	-0.158712	-0.0992624	0.085808	-0.0224017	-0.106243	0.0887143	-0.244153	0.0330923	0.350547	1	0.142177	0.261239	-0.405006	-0.0400432	0.460165	0.125604	-0.0949222	-0.188181	-0.14861	-0.250795	0.202348	0.207058	0.03256	0.064157	0.0190816	0.00955175	-0.0915464	-0.2795
C27	0.117692	-0.108979	-0.0368818	0.024287	0.0672443	0.0252582	-0.0659784	-0.0405091	-0.0611889	-0.0141786	-0.0416006	-0.0292965	-0.010847	0.229115	0.0218187	-0.01345	0.0406483	0.0489715	0.0889855	-0.206612	0.347725	0.244084	-0.0408694	0.0302481	0.191066	0.142177	1	0.12027	-0.0191807	0.0844717	0.11003	0.038802	0.0677212	0.0042217	0.174501	-0.0575113	0.0891436	0.0278156	0.0241296	-0.0978583	0.111132	0.221679	-0.0286037	0.0635054
C28	0.41504	-0.499886	-0.0370225	0.0218147	0.244857	0.295133	-0.0933444	0.28496	0.257006	-0.288499	-0.148197	-0.173804	0.0298944	0.160043	-0.375875	-0.00805876	-0.368025	0.200206	0.0158085	0.0592751	-0.119515	0.286116	-0.0666536	-0.12443	0.3575	0.261239	0.12027	1	-0.407381	-0.300308	0.371679	-0.0163159	-0.0457385	-0.131741	-0.287773	0.126988	-0.0341428	0.190121	0.134343	-0.154514	0.0493964	0.304589	0.133584	-0.361355
C29	-0.264035	0.65974	0.228677	0.154726	-0.30735	-0.0585374	0.313999	-0.124202	-0.251627	0.309132	0.410316	0.307725	-0.0814986	0.0128597	0.411738	-0.0928877	0.448287	-0.0082745	-0.0729354	0.0709129	0.290341	-0.0393369	0.348659	0.0669215	-0.41618	-0.405006	-0.0191807	-0.407381	1	0.348089	-0.275818	0.0857996	0.287831	0.311087	0.340348	0.186895	0.214458	-0.395133	0.0561251	0.0698495	0.230955	0.0297224	-0.105014	0.543167
C30	-0.137282	0.472094	0.211682	0.234848	-0.238265	-0.0520674	0.10804	-0.351646	-0.228275	0.147539	0.201104	0.223332	-0.0501056	-0.019517	0.257924	-0.0372787	0.415034	0.00619802	-0.088725	0.0580176	0.311823	0.0627245	0.0886129	-0.0283367	-0.253805	-0.0400432	0.0844717	-0.300308	0.348089	1	0.00770932	0.0788447	0.0801527	0.174022	0.178546	0.107558	0.126359	-0.0651459	0.0713404	0.127492	0.0992365	-0.137958	-0.205559	0.30673
C31	0.137932	-0.0710884	0.258635	0.304217	-0.0455475	0.396834	-0.222946	0.0528851	0.305574	-0.244251	-0.132714	0.280704	0.139926	0.0684875	0.00528259	0.0867067	0.137706	0.0845804	0.0628794	0.328241	-0.183282	0.323289	-0.0565781	0.0491861	0.149763	0.460165	0.11003	0.371679	-0.275818	0.00770932	1	0.275341	0.197277	0.15919	-0.4653	0.121054	0.293615	0.176709	0.144047	0.135264	0.3196	0.112404	-0.0688683	-0.162644
C32	-0.31873	-0.00744782	0.0851377	0.169711	-0.0719384	0.230274	0.172044	-0.0689196	0.139134	-0.0583343	0.0672373	0.346593	0.111382	0.0956615	0.154208	0.106762	0.104701	0.129292	-0.0561622	0.127232	0.0571883	0.201382	0.18602	0.155187	0.0824714	0.125604	0.038802	-0.0163159	0.0857996	0.0788447	0.275341	1	0.236963	-0.043042	0.026123	-0.00437714	0.359174	-0.0234656	0.073326	0.0261048	0.35515	0.0614261	-0.0172182	0.1628
C33	0.0814406	0.291526	0.169741	0.37382	-0.19881	0.371438	0.142443	0.0999397	0.300469	0.0771073	0.321974	-0.0739132	-0.0810993	0.0303062	0.19497	0.205891	0.318417	0.237111	-0.0557594	0.348145	0.226406	0.304372	0.507023	-0.0703457	-0.0516982	-0.0949222	0.0677212	-0.0457385	0.287831	0.0801527	0.197277	0.236963	1	0.484215	-0.0222081	0.395555	0.140985	-0.425544	0.488945	-0.137709	0.487803	0.205006	0.101866	0.562604
C34	0.286901	0.412821	0.271261	0.36742	-0.274546	0.252952	0.100084	0.0971972	-0.0367139	0.0577558	0.445876	0.0616451	-0.0854737	0.0620016	0.24727	0.0168223	0.417354	0.312319	0.1614	0.382059	0.189064	0.199828	0.456355	-0.0141315	-0.222111	-0.188181	0.0042217	-0.131741	0.311087	0.174022	0.15919	-0.043042	0.484215	1	-0.0657399	0.522697	0.00822365	-0.350164	0.390311	-0.0216142	0.289579	0.196406	0.0556679	0.26268
C35	-0.292262	0.218053	0.0446133	-0.207637	0.101858	-0.196112	0.186599	0.0132422	-0.504016	0.285179	0.137851	-0.0727708	-0.00377765	0.134296	-0.030434	-0.146311	0.00471026	-0.0694808	0.00779337	-0.339046	0.514069	-0.256167	0.162886	0.0954191	-0.166908	-0.14861	0.174501	-0.287773	0.340348	0.178546	-0.4653	0.026123	-0.0222081	-0.0657399	1	-0.214129	-0.0830049	-0.160968	-0.227583	0.0229897	-0.0733696	-0.147388	-0.0492967	0.235291
C36	0.492351	0.192033	0.196358	0.419652	-0.304105	0.207471	-0.0203523	-0.0460786	0.0824376	-0.108168	0.309879	0.0606937	-0.0430144	-0.028988	0.273587	0.107893	0.332555	0.349633	-0.030033	0.410592	0.0298176	0.480944	0.251115	-0.0585642	-0.222504	-0.250795	-0.0575113	0.126988	0.186895	0.107558	0.121054	-0.00437714	0.395555	0.522697	-0.214129	1	-0.0247535	-0.267136	0.318897	-0.0428371	0.23501	0.327758	0.169095	0.26947
C37	-0.184813	0.141985	0.212139	0.0355487	-0.229207	0.145291	0.0152947	-0.0713815	0.300266	0.0343636	-0.0669055	0.550394	0.256882	0.114301	0.289256	-0.0420386	0.29843	-0.214535	-0.118739	0.077866	-0.0518666	0.185215	0.12287	0.219476	-0.0316209	0.202348	0.0891436	-0.0341428	0.214458	0.126359	0.293615	0.359174	0.140985	0.00822365	-0.0830049	-0.0247535	1	-0.0800321	0.120772	0.346096	0.526807	0.0993425	-0.0168761	0.054259
C38	0.00409762	-0.373867	-0.111647	-0.190958	0.24649	-0.152111	-0.159821	-0.0963367	-0.084504	-0.160354	-0.346517	-0.0279097	0.116784	0.0181085	-0.233913	-0.0390523	-0.403872	0.0376557	0.164752	-0.177011	-0.195539	-0.0938344	-0.407553	-0.0154476	0.253539	0.207058	0.0278156	0.190121	-0.395133	-0.0651459	0.176709	-0.0234656	-0.425544	-0.350164	-0.160968	-0.267136	-0.0800321	1	-0.261809	0.08566	-0.341237	-0.0299877	-0.038067	-0.374393
C39	0.211727	0.0603517	0.135093	0.308122	0.00518693	0.500722	0.290309	0.264978	0.413175	0.0857938	0.325679	-0.223119	-0.00413795	-0.0214275	0.0595533	0.335674	0.168001	0.326249	0.103411	0.385819	0.157365	0.189789	0.326623	-0.000843736	0.144184	0.03256	0.0241296	0.134343	0.0561251	0.0713404	0.144047	0.073326	0.488945	0.390311	-0.227583	0.318897	0.120772	-0.261809	1	-0.0996802	0.360725	0.442278	0.258103	0.0626096
C40	-0.276247	0.0392929	0.314166	-0.217587	0.01398	0.104943	0.0888533	-0.128615	-0.176388	0.206756	-0.0611325	0.409164	0.73501	-0.0554216	0.0140083	0.0573896	0.133145	-0.184933	0.12722	0.0797866	-0.0753773	-0.25748	0.0323192	0.457494	-0.268247	0.064157	-0.0978583	-0.154514	0.0698495	0.127492	0.135264	0.0261048	-0.137709	-0.0216142	0.0229897	-0.0428371	0.346096	0.08566	-0.0996802	1	0.130349	-0.0677427	-0.0405839	-0.0939327
C41	-0.0294489	0.203664	0.20164	0.281069	-0.251958	0.282994	0.13126	0.215315	0.303388	0.0303148	0.189926	0.321301	0.149372	0.26483	0.369551	0.128411	0.418778	-0.0367552	-0.203325	0.269967	0.268162	0.507918	0.313942	0.183053	0.000563104	0.0190816	0.111132	0.0493964	0.230955	0.0992365	0.3196	0.35515	0.487803	0.289579	-0.0733696	0.23501	0.526807	-0.341237	0.360725	0.130349	1	0.18452	0.0922957	0.157619
C42	0.277162	-0.244158	-0.00420709	0.176152	0.026083	0.293235	0.259777	0.271475	0.193898	-0.0398718	0.218719	-0.157875	0.0431231	0.117903	-0.0785707	0.316444	-0.051878	0.321787	0.24576	0.213619	0.15071	0.182636	0.0966856	-0.0689295	0.21173	0.00955175	0.221679	0.304589	0.0297224	-0.137958	0.112404	0.0614261	0.205006	0.196406	-0.147388	0.327758	0.0993425	-0.0299877	0.442278	-0.0677427	0.18452	1	0.351146	-0.0767768
C43	-0.0324159	-0.18992	-0.0763321	-0.0199071	0.0847995	0.0231358	0.239396	0.176926	0.0727419	0.0957439	0.191202	-0.261293	0.0555334	0.321903	-0.0912904	0.291319	-0.132069	0.00254142	0.317415	0.00364321	0.111996	-0.0601309	0.0112597	-0.0987385	0.121071	-0.0915464	-0.0286037	0.133584	-0.105014	-0.205559	-0.0688683	-0.0172182	0.101866	0.0556679	-0.0492967	0.169095	-0.0168761	-0.038067	0.258103	-0.0405839	0.0922957	0.351146	1	-0.0047609
C44	-0.165152	0.506682	0.161854	0.302982	-0.319209	-0.0431628	0.118044	-0.291829	-0.0846041	0.141247	0.348665	0.0908923	-0.194703	0.0790569	0.266565	-0.0117694	0.408268	0.0547099	-0.0663072	0.0803088	0.226066	0.114234	0.289191	-0.0652363	-0.358229	-0.2795	0.0635054	-0.361355	0.543167	0.30673	-0.162644	0.1628	0.562604	0.26268	0.235291	0.26947	0.054259	-0.374393	0.0626096	-0.0939327	0.157619	-0.0767768	-0.0047609	1

## Sheet: GRAPH DATA
WT	QW	0.095
WT	QW	0.099
WT	QW	0.068
WT	QW	0.087
WT	QW	0.074
WT	QW	0.099
WT	NREMS	0.096
WT	NREMS	0.046
WT	NREMS	0.16
WT	NREMS	0.14
WT	NREMS	0.13
WT	NREMS	0.15
WT	REMS	0.081
WT	REMS	0.068
WT	REMS	0.091
WT	REMS	0.15
WT	REMS	0.089
WT	REMS	0.099
WT	AWO	0.17
WT	AWO	0.098
WT	AWO	0.098
WT	AWO	0.12
WT	AWO	0.16
NC	QW	0.024
NC	QW	0.036
NC	QW	0.025
NC	QW	0.026
NC	NREMS	0.039
NC	NREMS	0.042
NC	NREMS	0.024
NC	NREMS	0.057
NC	NREMS	0.039
NC	NREMS	0.028
NC	REMS	0.031
NC	REMS	0.026
NC	REMS	0.029
NC	REMS	0.037
NC	REMS	0.039
NC	REMS	0.048
NC	HAW	0.025
NC	HAW	0.022
NC	HAW	0.034
NC	HAW	0.026
NC	HAW	0.027
NC	AW	0.045
NC	AW	0.029
NC	AW	0.019
NC	AW	0.026
NC	AW	0.037
NC	AW	0.034
NC	SC	0.092
NC	SC	0.12
NC	SC	0.13
NC	SC	0.098
NC	SC	0.078
NC	SC	0.18
NC	SC	0.17
NC	SC	0.175
NC	SC	0.21
NC	SC	0.17
NC	EC	0.39
NC	EC	0.13
NC	EC	0.24
NC	EC	0.27
NC	EC	0.48
NC	EC	0.46
NC	EC	0.61
NC	EC	0.39
NC	EC	0.67
NC	EC	0.11
NC	EC	0.37
NC	EC	0.49
NC	EC	0.2
NC	EC	0.37
