# Supplementary material for: Activity dynamics of amygdala GABAergic neurons during cataplexy of narcolepsy
Source: eLife. 2019 Aug 14;8:e48311. doi: 10.7554/eLife.48311 (PMC6703899; doi:10.7554/eLife.48311)
Supplement: Figure 6—source data 1. [file elife-48311-fig6-data1.xlsx]

## Sheet: Sheet1
cataplexy duration (second)
SC		EC
9.21		14.62
18.03		12.33
13.45		8.49
14.2		9.12
7.82		10.85
24.92		20.1
27.08		12.05
17.5		13.98
12.05		18.45
21.35		12.22
		11.67
		13.23
		10.38
		15.69
